# Supplementary material for: LncRNA-Based Classification of Triple Negative Breast Cancer Revealed Inherent Tumor Heterogeneity and Vulnerabilities
Source: Noncoding RNA. 2022 Jun 21;8(4):44. doi: 10.3390/ncrna8040044 (PMC9326727; doi:10.3390/ncrna8040044)
Supplement: Supplementary file 1 [file ncrna-08-00044-s001.zip]

Archive with 13 entries (13 files):
- Supplementary figure S1.pdf
- Supplementary figure S2.pdf
- Supplementary figure S3.pdf
- Supplementary figure S4.pdf
- Supplementary figure S5.pdf
- Supplementary figure S6.pdf
- supplementary table S1.xlsx
- Supplementary table S2.xlsx
- Supplementary table S3.xlsx
- Supplementary table S4.xlsx
- Supplementary table S5.xlsx
- Supplementary table S6.xlsx
- Supplementary table S7.xlsx
