# Supplementary material for: LncRNA-Based Classification of Triple Negative Breast Cancer Revealed Inherent Tumor Heterogeneity and Vulnerabilities
Source: Noncoding RNA. 2022 Jun 21;8(4):44. doi: 10.3390/ncrna8040044 (PMC9326727; doi:10.3390/ncrna8040044)
Supplement: Supplementary file 1 [file ncrna-08-00044-s001.zip › supplementary table S1.xlsx]

## Sheet: GE.TNBC_vs_NT-fold2.0_adjp0.05
Supplementary table S1. Differentially expressed lncRNA transcripts in TNBC (n=360) vs controls (n=88)
GeneID (Regulation criterion: fold > 2.0 and adjp p-value < 0.05)	TNBC_vs_NT-log_fold	TNBC_vs_NT-p_value
LINC01614-201	3.23769	4.57593e-61
AC007991.2-201	2.81756	2.31695e-19
AL354864.1-201	2.48081	1.01723e-61
AC145207.4-201	2.35584	3.04466e-60
DIAPH3-AS1-202	2.32518	1.02699e-39
AC099063.1-201	2.30956	2.95693e-27
SGO1-AS1-202	2.29916	1.25357e-55
AC126696.2-201	2.26071	1.13816e-39
LINC00511-259	2.25271	4.09983e-26
SLC12A5-AS1-202	2.22895	1.30669e-32
AL356218.2-203	2.20927	4.48697e-23
LINC01956-201	2.20341	2.78195e-12
LINC00511-207	2.18738	4.57671e-21
LINC00511-300	2.15442	3.21512e-21
LINC00511-305	2.09568	7.50918e-14
AC131944.1-201	2.07077	2.19279e-23
AC126407.1-201	2.04491	1.46034e-19
LINC01956-202	2.03925	2.57799e-14
ST8SIA6-AS1-203	1.97854	1.88184e-15
AC008870.3-201	1.94517	7.14675e-40
AC009022.1-205	1.90803	3.52533e-14
IDI2-AS1-202	1.90226	6.32274e-22
LINC00511-242	1.8804	7.45016e-20
PRC1-AS1-202	1.87654	9.80289e-42
AL138789.1-201	1.85536	6.13602e-45
AC112721.2-201	1.84683	1.41889e-35
LINC00511-301	1.82072	3.41994e-21
SNHG12-202	1.7962	5.92065e-35
AC020656.1-201	1.77884	9.29457e-25
HMMR-AS1-202	1.75475	1.23004e-52
U62317.1-201	1.73966	9.83109e-26
CCDC144NL-AS1-206	1.72394	1.46211e-21
AL049569.2-201	1.71704	2.46261e-28
BX119904.2-201	1.6996	1.487e-11
AC125611.3-201	1.69752	1.72304e-46
LINC01943-203	1.69062	1.0325e-14
AD000090.1-201	1.67808	8.09765e-07
LINC01857-201	1.65211	1.06619e-31
AL513318.2-202	1.65136	4.41123e-35
AC012645.3-202	1.63468	2.24574e-24
AL807752.3-201	1.61149	1.30835e-28
GAS5-207	1.58453	2.15872e-22
SNHG3-203	1.5832	1.61577e-22
AC123768.5-201	1.57441	3.67676e-46
SNHG6-205	1.5661	7.73819e-25
AC084125.4-201	1.56051	6.91315e-27
AC140658.1-201	1.52864	4.42579e-08
KIF26B-AS1-201	1.52611	8.2499e-25
TYMSOS-201	1.52115	3.56151e-29
SMIM25-203	1.51958	4.15253e-31
MUC5B-AS1-201	1.51326	1.32416e-08
MIR4435-2HG-203	1.51014	1.52282e-33
SNHG6-202	1.49895	1.40316e-19
AC097460.1-201	1.49183	4.56371e-48
AL355075.3-201	1.48343	2.76515e-42
SNHG16-204	1.48279	5.62261e-18
AL356417.2-202	1.46317	9.46558e-20
AC092069.1-201	1.45407	1.56511e-47
NIFK-AS1-207	1.45247	5.44204e-13
PRC1-AS1-203	1.44748	3.03542e-32
AC008115.2-201	1.44483	4.40989e-20
MMP2-AS1-201	1.44469	1.81998e-22
AL592166.1-201	1.44322	1.05888e-25
AL162413.1-201	1.4357	3.94607e-07
LINC00511-263	1.43249	7.54844e-20
AL355483.1-201	1.43243	2.68955e-27
LINC00511-303	1.43229	1.35889e-18
PPP1R14B-AS1-202	1.40496	2.1577e-19
AC023593.1-201	1.3909	8.90334e-34
AL137857.1-201	1.38662	3.97365e-25
AC246680.1-201	1.38282	7.89552e-11
AC006064.4-201	1.38154	2.19513e-32
MALAT1-203	1.38125	0.000512213
LINC00511-293	1.38109	1.2099e-15
PSMB8-AS1-207	1.36617	1.50044e-21
LYPLAL1-AS1-207	1.36502	1.35514e-25
Z84488.1-201	1.35605	1.42538e-18
AL109914.1-201	1.34336	1.77367e-08
GAS5-204	1.33959	6.88895e-17
LINC00511-248	1.33746	2.0514e-20
AC134312.5-203	1.32532	1.38696e-25
AC110767.1-201	1.32375	5.11401e-10
MAGEA10-MAGEA5-203	1.31647	5.49032e-07
AL606760.1-202	1.30613	9.49857e-31
AC112721.1-201	1.3011	1.96933e-23
AC119427.2-202	1.30102	3.41324e-14
AL022316.1-201	1.28895	3.50984e-16
TUG1-201	1.27373	4.27553e-10
AC015909.1-211	1.27024	3.83647e-11
DIAPH3-AS2-201	1.25105	4.56336e-30
KIRREL3-AS1-201	1.24983	4.58616e-10
MIR3142HG-201	1.24863	2.40119e-20
AC104462.2-201	1.24702	1.11147e-13
LINC00511-277	1.24606	9.91714e-17
AP000697.1-201	1.24358	2.28998e-13
AL355483.3-201	1.24345	9.41858e-23
LINC00511-251	1.23519	1.84855e-13
AP000763.4-201	1.23418	1.1963e-32
AC007639.1-201	1.22948	3.94765e-20
AC027601.1-205	1.2278	8.273e-09
AP003465.1-201	1.22149	6.4467e-26
AC105105.1-201	1.22125	7.07038e-23
FNDC1-IT1-201	1.21941	8.94959e-18
HCP5-204	1.21581	1.0546e-08
CYTOR-201	1.2075	4.82431e-22
LINC00511-210	1.20301	2.67947e-18
LINC02446-201	1.19411	1.32613e-14
LINC00511-256	1.19013	1.07004e-18
NEAT1-206	1.18527	1.82779e-05
AC091117.1-201	1.18197	1.21595e-11
LINC01138-214	1.18193	3.57438e-12
ST8SIA6-AS1-204	1.18037	1.09575e-08
AC145207.3-201	1.17431	9.02353e-30
AC002563.1-201	1.17428	4.58367e-22
AC011603.2-204	1.17396	1.35286e-38
AL355483.2-201	1.17369	5.58492e-24
AL356417.2-201	1.16919	3.7065e-18
KCNQ5-IT1-201	1.16493	3.30648e-13
AC111152.2-201	1.15825	8.91198e-29
AC034238.1-203	1.15674	3.18379e-11
AC026782.2-201	1.15311	1.10576e-30
HLA-DQB1-AS1-201	1.15278	3.25149e-17
LINC01705-202	1.14748	9.54913e-23
Z84484.1-201	1.14461	5.53903e-16
AC027020.1-202	1.14248	4.89752e-10
PPP1R14B-AS1-204	1.14122	3.68685e-27
AC011352.3-201	1.13829	1.07997e-10
AC023796.2-201	1.13743	4.14703e-15
AL445288.1-201	1.13432	5.49154e-21
LINC00511-249	1.13408	1.00145e-17
MALAT1-215	1.13083	0.033575
AC024230.1-202	1.12938	5.1051e-15
WT1-AS-208	1.12891	1.52981e-07
INHBA-AS1-205	1.12766	1.12618e-26
LINC02700-203	1.12268	1.54432e-23
AC004687.1-201	1.12203	3.14634e-14
MIF-AS1-201	1.1146	1.04088e-27
AL136131.3-201	1.11396	8.30051e-11
AC010729.2-201	1.11138	1.3877e-19
AC087318.1-201	1.10746	1.59954e-13
GAS5-203	1.10476	7.72757e-13
LINC02195-201	1.1024	1.74084e-14
TRBV11-2-201	1.10138	8.92681e-12
AC106820.6-201	1.1004	6.30226e-27
AL050404.1-201	1.09828	5.50716e-09
AC023194.3-201	1.09075	6.23379e-11
AC068580.1-201	1.09049	9.76434e-17
LINC00426-206	1.08749	2.9902e-10
FP236383.9-201	1.087	0.000356728
SNHG28-201	1.08597	2.37363e-19
AC012358.3-225	1.0858	4.77967e-08
STEAP3-AS1-202	1.08155	4.28824e-14
AL157955.1-201	1.07336	3.73084e-13
RAB30-DT-203	1.07028	3.7548e-19
ARNTL2-AS1-201	1.06959	1.44251e-14
CPB2-AS1-212	1.06434	1.29262e-18
AC099850.3-201	1.06315	1.25781e-19
AC133644.3-201	1.06201	9.62789e-20
PRC1-AS1-205	1.06155	9.62018e-19
AC068580.3-201	1.06105	3.34244e-21
HOTAIR-201	1.0596	1.37625e-11
MAL2-AS1-201	1.05694	1.83098e-10
MIAT-221	1.05616	8.79349e-15
DIAPH3-AS1-204	1.0555	3.70852e-25
AP001783.1-201	1.05422	3.66451e-09
AC124276.2-201	1.05134	9.3613e-16
LINC00511-220	1.04918	1.39523e-19
IL21R-AS1-201	1.04699	2.61001e-23
AC106820.5-201	1.04629	5.06495e-18
AC078883.1-204	1.04621	9.21604e-11
AL354707.1-203	1.04576	1.34019e-09
DIAPH3-AS1-201	1.04078	4.11674e-12
LINC02161-201	1.04062	2.14346e-13
AL592166.1-202	1.03648	3.01883e-22
AP001610.2-201	1.0357	2.94989e-08
AC013437.1-201	1.0355	4.38447e-12
COPDA1-201	1.02724	1.0526e-06
AC004707.1-201	1.02677	4.85272e-28
AC109322.1-201	1.01793	1.26939e-24
AC027627.1-201	1.01238	1.62936e-34
AC009630.2-202	1.01003	9.35421e-20
U62317.2-201	1.00917	4.19873e-24
AC025580.2-201	1.00807	1.21395e-16
MIR762HG-204	1.00508	1.54284e-06
AL137191.1-201	1.00166	2.64548e-29
AP003392.3-201	1.0001	8.78904e-25
AC025917.1-201	-1.00016	2.23801e-18
ADAMTS9-AS1-214	-1.00033	5.48128e-19
AL161457.2-201	-1.00074	5.39141e-19
AC073651.1-201	-1.00123	3.12324e-21
AP000897.2-202	-1.00133	4.85329e-23
AC011611.4-201	-1.0017	1.19889e-25
NAV2-AS4-201	-1.00185	1.08653e-32
MEF2C-AS1-205	-1.00195	2.38451e-17
LINC01906-201	-1.00224	3.92174e-12
AC110772.1-201	-1.00233	8.55543e-40
AC079193.2-201	-1.00287	4.15445e-50
AC104126.1-201	-1.00293	2.01246e-19
AC105233.5-202	-1.00312	2.01421e-30
AL136164.3-201	-1.00313	2.08338e-17
MAST4-IT1-201	-1.00339	1.27631e-24
AC117498.1-201	-1.00343	3.20221e-23
AL157770.1-201	-1.00351	5.29789e-22
AC025809.1-201	-1.00372	1.39207e-22
NFIA-AS1-203	-1.00378	9.79258e-14
AL133372.2-203	-1.00384	1.06125e-30
AC090844.2-201	-1.00414	6.13531e-25
AL845552.2-201	-1.00428	2.4937e-16
AC046134.2-215	-1.00468	1.15153e-15
AC004982.2-203	-1.00474	1.86718e-08
ETV5-AS1-201	-1.00485	8.08626e-18
UST-AS1-201	-1.00558	8.24877e-24
IQCJ-SCHIP1-AS1-201	-1.00575	3.02131e-12
AL355612.1-202	-1.00598	1.10256e-21
CCND2-AS1-207	-1.00601	6.75545e-14
AC114488.2-222	-1.00612	3.96254e-19
AC010776.1-201	-1.00614	3.95422e-28
AL138828.1-208	-1.0062	4.94224e-23
AC007098.1-203	-1.00623	4.00545e-24
TCEAL3-AS1-201	-1.00626	3.5181e-19
LINC-PINT-201	-1.00627	6.38904e-19
AC007036.1-201	-1.00629	3.15894e-27
AP005901.2-201	-1.0067	8.51807e-25
AC012625.1-201	-1.0067	3.56151e-29
AC093801.1-202	-1.00672	2.01951e-15
TTC28-AS1-223	-1.00716	9.86821e-41
CD27-AS1-202	-1.00743	3.84734e-14
AC136698.1-201	-1.00803	2.67283e-29
AC048382.4-201	-1.00803	2.67283e-29
AC092535.4-201	-1.00818	5.72873e-15
LINC01235-206	-1.00828	1.7031e-09
AC022196.1-201	-1.00875	2.09865e-13
AC093866.1-207	-1.00919	1.70852e-31
AC022382.1-201	-1.00983	3.50214e-18
AC130895.1-201	-1.00986	8.41244e-27
AC112211.1-201	-1.00995	1.17358e-18
GOLGA8M-203	-1.00996	9.06273e-23
AL161457.2-204	-1.01043	1.80812e-18
BX664727.3-205	-1.01044	2.26896e-13
LINC02202-201	-1.01125	2.35573e-28
Z73429.1-201	-1.01144	1.41066e-27
AP003774.1-203	-1.01149	7.27379e-20
LINC02284-203	-1.01192	1.3515e-64
AL360181.1-201	-1.01248	6.06067e-11
STARD13-AS-234	-1.01253	2.20386e-33
AC130371.2-201	-1.01261	8.74351e-20
THUMPD3-AS1-217	-1.01268	7.61631e-10
LINC02607-202	-1.01269	1.18937e-17
AC010735.1-201	-1.01273	5.66226e-22
AL020997.3-201	-1.01357	1.78504e-22
MEG8-235	-1.01359	4.12416e-38
AC078925.2-201	-1.01362	8.41832e-52
LINC00937-203	-1.01391	3.15951e-13
AC106897.1-202	-1.01431	7.293e-26
MRVI1-AS1-201	-1.01482	2.43827e-22
AL356652.1-201	-1.01509	9.51322e-20
NAV2-AS2-201	-1.01514	4.51179e-09
TMEM246-AS1-204	-1.0152	8.99397e-37
LINC-PINT-214	-1.01628	2.91838e-27
AC015563.2-201	-1.01647	2.72244e-19
GARS-DT-216	-1.01668	3.65345e-17
HOXA-AS2-205	-1.0174	2.7624e-16
AC012321.1-201	-1.01774	2.76776e-23
MUC20-OT1-243	-1.01781	1.55875e-14
AC126768.1-201	-1.01787	7.0495e-29
AC026329.1-201	-1.01863	2.79928e-26
AC019270.1-201	-1.0192	5.38782e-52
LINC02021-201	-1.01923	1.57294e-23
AC110792.3-201	-1.0194	7.42475e-20
AL353803.5-201	-1.02016	3.12955e-05
AC093158.1-201	-1.02034	1.78437e-44
AP005242.1-201	-1.02068	1.60498e-22
AC079177.1-201	-1.02087	1.82217e-56
AP000757.2-201	-1.02106	3.72344e-26
MYLK-AS1-203	-1.02163	5.38738e-19
AC021517.1-205	-1.02168	1.83585e-32
AC093382.1-201	-1.02233	6.94098e-17
AC022966.1-201	-1.02239	3.70833e-13
AC010776.2-201	-1.02241	3.66498e-46
AC067969.2-201	-1.02246	9.89563e-30
AC006013.1-201	-1.02295	4.60377e-29
RMST-221	-1.02335	2.7692e-42
AC008080.3-201	-1.02444	7.44094e-21
AC007342.4-202	-1.02485	1.4498e-08
AL391427.1-201	-1.02489	1.5437e-08
RMST-211	-1.02503	6.52042e-34
AC007193.2-201	-1.02537	9.00502e-25
LINC01643-203	-1.02578	1.76662e-26
LINC01905-219	-1.02589	2.3251e-26
MCTP1-AS1-201	-1.02597	5.30273e-18
AC073525.1-201	-1.02643	8.01629e-19
AL109811.2-201	-1.02647	1.95624e-29
AC096541.1-201	-1.02727	8.31181e-43
LINC01697-202	-1.02756	1.82755e-36
LINC-PINT-211	-1.02784	5.20147e-31
LINC02614-201	-1.02817	4.24227e-24
MIR205HG-205	-1.02879	3.27038e-06
AC120024.1-201	-1.02914	3.5621e-27
AC244517.4-201	-1.03	6.07956e-12
AC026316.2-201	-1.03	5.89852e-21
AC138123.2-201	-1.03004	1.66456e-25
AL356134.1-201	-1.0301	3.71405e-08
AC097500.1-201	-1.03022	6.7767e-26
AC128687.3-201	-1.0308	5.2297e-13
CA3-AS1-208	-1.03099	8.10103e-27
AC044810.2-201	-1.03145	2.6383e-19
AC067747.1-201	-1.03147	6.17862e-12
LINC01352-201	-1.03247	2.27073e-40
TPT1-AS1-208	-1.03286	3.13609e-12
AL161457.2-203	-1.03309	6.50046e-23
AL589990.1-201	-1.03311	1.04494e-19
AC105450.1-201	-1.03329	1.93625e-31
NAV2-AS3-201	-1.03333	8.46085e-16
AC020659.2-201	-1.03406	1.56038e-25
ARHGEF7-IT1-201	-1.03493	1.88249e-44
CYB561D2-207	-1.03527	4.75108e-21
AC037459.4-201	-1.03534	9.5332e-26
AL513548.4-201	-1.0355	1.58726e-16
AC105046.1-201	-1.03623	9.16236e-52
AC003973.2-201	-1.03662	5.03054e-17
SNHG7-202	-1.03699	1.32317e-14
LINC02021-204	-1.03812	4.6051e-12
BEAN1-AS1-203	-1.03816	5.2986e-24
AL356124.1-203	-1.03824	4.88431e-39
AL356356.1-201	-1.03863	3.64767e-14
MALAT1-206	-1.03864	2.71451e-09
FAM13A-AS1-205	-1.03868	2.23607e-20
AL357972.1-201	-1.03898	3.53382e-16
LINC02614-217	-1.03926	3.13788e-12
AL450163.1-202	-1.03932	4.24732e-23
AL096870.1-201	-1.03944	1.80925e-18
AC130352.1-201	-1.03987	3.4213e-23
TTN-AS1-262	-1.04008	5.9013e-20
AC009560.1-201	-1.0407	5.42959e-25
AL139317.5-208	-1.04083	1.07468e-41
LINC00989-207	-1.04152	2.63353e-72
LINC02021-202	-1.04253	7.8941e-22
NR2F1-AS1-253	-1.04258	4.57291e-32
AC103876.1-201	-1.04273	4.39995e-19
AC019055.1-201	-1.04274	4.56878e-22
MUC20-OT1-305	-1.04277	1.09038e-17
OSER1-DT-203	-1.04283	3.0665e-15
TUSC8-201	-1.04344	5.8483e-15
HOXA-AS3-202	-1.04352	5.23726e-22
COL4A2-AS2-201	-1.04377	6.88507e-20
DUBR-211	-1.04557	1.09096e-21
LINC02018-216	-1.04562	1.85123e-31
PCDH9-AS3-201	-1.04601	1.78905e-40
LINC01197-219	-1.04784	6.52042e-34
AC010261.2-202	-1.04785	5.26628e-17
AC003992.1-201	-1.0479	3.28049e-31
AC008080.4-201	-1.04815	5.72999e-30
BEAN1-AS1-201	-1.04831	1.16624e-29
LINC01060-214	-1.0484	9.01495e-23
TTN-AS1-252	-1.04847	1.52887e-22
AL354766.2-201	-1.04888	1.1638e-12
LINC02568-202	-1.0489	1.40463e-20
GARS-DT-203	-1.04944	1.86515e-30
SNHG29-221	-1.04963	9.58748e-14
AL109809.5-203	-1.04974	4.83478e-17
AC064836.2-201	-1.04977	2.81246e-23
AL049780.3-201	-1.04989	5.61361e-33
AC117489.1-201	-1.05007	2.06153e-28
AC010542.2-201	-1.05035	2.57027e-27
AC110760.2-201	-1.0509	6.18038e-42
MAP3K20-AS1-203	-1.05118	2.47251e-24
CYB561D2-211	-1.05189	5.56935e-19
MIR22HG-208	-1.05227	3.97118e-22
TMEM147-AS1-201	-1.05244	2.10248e-12
AL158835.1-205	-1.05259	2.82555e-19
AL353138.1-201	-1.0527	9.2731e-21
AC012467.1-201	-1.05472	2.59582e-08
MAP3K20-AS1-202	-1.05565	1.70052e-21
MUC20-OT1-251	-1.05606	2.01072e-09
AL589935.1-216	-1.05679	9.38304e-16
NFIA-AS1-204	-1.05712	6.02948e-09
AC006387.1-206	-1.05713	5.11058e-16
MUC20-OT1-268	-1.0575	2.45872e-12
AL161908.1-202	-1.05816	4.63317e-12
AC022509.1-204	-1.05818	5.06437e-17
AP006248.4-201	-1.05821	5.72863e-28
AC110772.2-205	-1.05888	1.29002e-42
AL132657.2-201	-1.05982	5.59331e-20
AL139383.1-202	-1.05991	1.33028e-24
PLCB1-IT1-202	-1.06014	2.67538e-11
AL445423.1-201	-1.06023	1.84618e-35
AC093866.1-208	-1.06059	1.47999e-18
AC107976.1-201	-1.06066	2.0025e-26
AL138828.1-214	-1.06153	4.27553e-10
AP002840.2-201	-1.06227	9.1519e-23
LIFR-AS1-202	-1.06256	1.48051e-40
FAM85B-201	-1.0634	7.59392e-22
TPRG1-AS2-201	-1.06443	4.92511e-26
AL162426.1-201	-1.06452	2.3076e-23
STARD13-AS-230	-1.06498	3.02132e-32
XIST-227	-1.06523	1.06484e-20
CHL1-AS2-203	-1.06528	1.2036e-46
AC005906.2-204	-1.06548	4.90604e-42
AC005695.3-201	-1.06569	1.32031e-13
LINC00498-201	-1.06618	6.36365e-21
AL391005.1-201	-1.06662	6.83017e-61
TMEM220-AS1-207	-1.06665	2.89697e-23
AC008440.1-201	-1.06694	8.29426e-27
HOXA-AS3-205	-1.06761	8.42566e-22
AC137056.1-202	-1.06782	1.74477e-37
AC110285.2-203	-1.06834	9.53258e-20
AC004466.2-201	-1.06862	2.86509e-23
AC003991.1-209	-1.06888	3.72241e-16
AC092111.1-201	-1.0693	6.41104e-29
AL163192.1-201	-1.06985	1.39847e-24
MUC20-OT1-253	-1.07021	5.29286e-15
AP002360.1-201	-1.07065	5.93804e-08
AC084064.1-201	-1.07185	3.35619e-25
LNX1-AS2-201	-1.07229	1.09039e-26
ZBTB20-AS5-201	-1.0723	5.54743e-26
MRPL23-AS1-201	-1.07354	2.84281e-39
HAND2-AS1-225	-1.07433	1.48559e-45
LINC01197-207	-1.07435	1.17705e-62
AL391421.1-201	-1.07436	1.08908e-18
LINC02685-203	-1.07497	2.62754e-31
LINC-ROR-208	-1.07524	4.41732e-15
AC012363.1-201	-1.07556	1.07691e-27
AL358790.1-204	-1.07607	2.37363e-16
EPB41L4A-AS1-203	-1.0762	3.73265e-11
MIR99AHG-228	-1.07655	5.94518e-32
AC010261.2-203	-1.07655	1.09608e-18
MYLK-AS2-202	-1.07732	1.2429e-27
SLC25A21-AS1-201	-1.07745	2.96174e-40
MYLK-AS2-201	-1.07803	2.07311e-19
AC011625.1-201	-1.07849	4.55325e-25
AC026765.3-203	-1.07906	1.63324e-20
AC007319.1-202	-1.07917	4.61944e-32
AC134043.3-201	-1.07947	1.29317e-44
LINC00173-202	-1.07996	1.79438e-17
AL590822.1-201	-1.0801	4.00055e-24
AC123768.3-204	-1.08029	8.06662e-40
AL117335.1-202	-1.08073	9.64665e-18
AL512598.1-201	-1.08077	2.4277e-16
TAT-AS1-204	-1.08142	1.51161e-28
AC010754.1-201	-1.08154	8.80474e-61
C1QTNF9-AS1-201	-1.08157	3.0513e-40
MEG8-229	-1.08253	8.06317e-37
CERS3-AS1-202	-1.08258	2.19794e-31
AC004241.4-201	-1.08262	3.11832e-51
AC114488.2-204	-1.08299	5.05619e-26
STARD13-AS-231	-1.08316	6.48277e-31
AC107896.1-202	-1.08327	4.22963e-14
CYP1B1-AS1-240	-1.08336	2.16984e-33
FAM66C-210	-1.08357	3.43154e-30
MEG8-241	-1.08369	7.08203e-40
AC002094.4-201	-1.08394	9.52054e-16
AC009119.2-202	-1.08503	2.17835e-10
AL358333.3-201	-1.08509	1.31501e-15
WDR86-AS1-204	-1.08532	7.7818e-24
AC080188.2-201	-1.08548	1.82319e-23
AL451064.1-201	-1.08561	4.00752e-32
AC026124.1-201	-1.08566	3.49905e-37
AC025271.2-201	-1.08576	3.99822e-16
MIR99AHG-274	-1.08599	3.29099e-28
LINC00893-213	-1.08645	4.62519e-30
ROCR-201	-1.08815	0.000177805
AC004784.1-201	-1.08835	9.49592e-41
CNTN4-AS1-201	-1.08871	5.59849e-33
HAND2-AS1-246	-1.08888	1.6142e-41
SPRY4-AS1-203	-1.08901	4.41967e-20
SNHG14-213	-1.08911	3.5725e-28
GAS1RR-201	-1.08978	1.43214e-55
SNHG29-243	-1.09061	5.95231e-17
PCAT19-210	-1.09128	7.45531e-17
LINC00710-205	-1.09214	1.99303e-74
AC103853.1-201	-1.09229	1.54237e-21
ZBTB20-AS5-203	-1.09247	4.788e-25
AC110760.1-201	-1.09255	1.63982e-21
AL135790.1-201	-1.09311	2.61117e-13
LINC01359-219	-1.09313	2.72095e-22
AC006435.5-201	-1.09334	3.75638e-09
AC087286.2-201	-1.09394	9.46177e-24
AC090617.5-201	-1.09419	2.11663e-23
FAM66B-207	-1.09425	2.52305e-37
AL731566.3-201	-1.09468	5.9746e-16
FP236383.3-201	-1.09483	4.09282e-08
AC098617.1-214	-1.09514	2.0755e-59
AL021937.3-203	-1.09521	4.79053e-11
AC091946.2-201	-1.09531	2.13077e-17
AP000477.1-201	-1.09535	1.22384e-16
FTX-221	-1.09547	6.57848e-23
AC005674.2-201	-1.09606	1.007e-30
AC091057.3-201	-1.09655	6.41326e-32
AC010618.3-203	-1.09678	4.34989e-24
AC104938.1-201	-1.09713	1.46431e-23
ADAMTS9-AS1-213	-1.09718	4.42801e-17
AC073571.1-201	-1.09719	7.61922e-23
AC003991.1-213	-1.09829	9.40801e-23
LINC01967-201	-1.09863	1.1828e-22
SNHG26-202	-1.09928	1.04616e-22
TBX2-AS1-206	-1.09941	3.78072e-20
AC018659.8-201	-1.09945	2.34132e-30
XIST-204	-1.10019	5.27548e-14
GNG12-AS1-201	-1.10066	2.33823e-35
LUCAT1-248	-1.10092	1.47748e-26
AC015908.2-201	-1.10129	2.806e-11
AC110760.2-202	-1.10143	1.69752e-32
AC007938.2-201	-1.1019	1.56482e-18
CYP4F26P-207	-1.10252	2.61202e-23
AC244517.11-204	-1.10265	1.31251e-19
AC010201.2-201	-1.10337	1.73523e-33
AC012370.1-201	-1.10356	1.10678e-21
AL589935.1-217	-1.10369	3.81117e-11
AL121890.2-201	-1.10389	1.82514e-31
MEG8-212	-1.10419	1.44917e-32
MIR99AHG-216	-1.1043	1.66093e-43
SOX5-AS1-215	-1.1044	9.38732e-40
AC018521.6-201	-1.10504	1.6988e-19
Z98752.1-201	-1.10533	3.08273e-21
LINC01028-201	-1.10611	1.73643e-58
ADAMTS9-AS1-205	-1.10723	5.5489e-16
AC110772.2-201	-1.10727	1.2831e-61
SNHG26-203	-1.10765	8.24653e-17
FAM66C-203	-1.10787	6.43332e-25
COL18A1-AS2-201	-1.10827	1.69815e-15
AC011373.1-201	-1.10827	6.76245e-12
AC022467.1-201	-1.1088	1.44722e-21
AL158847.1-201	-1.109	1.8959e-09
LINC00472-207	-1.11	2.75402e-19
AC008669.1-201	-1.1105	8.05383e-41
AC074033.1-201	-1.11177	2.3485e-23
SEMA6A-AS1-204	-1.1138	5.56308e-30
AC106845.1-201	-1.11423	3.28943e-38
AP002761.2-201	-1.11424	2.28529e-13
MIR100HG-217	-1.11511	3.92517e-32
TTN-AS1-202	-1.11518	5.66073e-23
AC019197.1-212	-1.11525	4.20931e-23
AL353651.1-201	-1.11723	1.86867e-24
LINC02802-203	-1.11832	4.66795e-21
AC064874.1-201	-1.11834	4.72872e-25
KAZN-AS1-206	-1.11861	2.72206e-15
NAV2-AS1-201	-1.11905	9.48596e-12
AC015727.1-201	-1.11944	2.92413e-25
AC010261.2-201	-1.11983	1.72455e-21
MIR99AHG-299	-1.11994	5.75536e-30
AC239809.3-203	-1.12043	3.20104e-16
AC112250.2-201	-1.12081	1.53665e-28
MIR205HG-201	-1.12097	5.805e-14
AL157832.1-201	-1.12115	6.0639e-24
AL121890.5-201	-1.12155	1.15346e-20
STARD13-AS-242	-1.12158	2.91557e-34
AC093827.4-202	-1.12364	2.86753e-15
STARD13-AS-248	-1.12383	3.79306e-34
AL158141.1-201	-1.12385	7.59741e-36
LINC02660-205	-1.12389	1.95406e-66
MUC20-OT1-229	-1.12424	4.80769e-23
LINC01359-205	-1.12504	8.83889e-48
AL589935.1-209	-1.12577	4.72843e-16
AC004889.1-210	-1.1271	2.89211e-30
AC090825.1-214	-1.12716	6.22191e-28
LINC00622-201	-1.12734	3.36391e-21
AL109659.2-201	-1.12793	3.20074e-39
AL390208.1-201	-1.12839	2.28102e-22
AC004889.1-209	-1.12857	4.50977e-17
PCDH9-AS2-201	-1.13023	5.28674e-37
FAM198B-AS1-202	-1.13042	3.8782e-27
ITGA9-AS1-209	-1.13054	4.02124e-23
AC092296.2-202	-1.13115	7.22336e-08
AC130456.4-201	-1.13135	1.59283e-11
AC002066.1-203	-1.13141	6.98888e-29
AC073862.3-201	-1.13145	3.6782e-65
AL161908.2-201	-1.13153	1.45283e-13
AC092902.2-201	-1.1322	3.75643e-18
AC073862.4-201	-1.13222	3.06279e-49
AC069029.1-201	-1.13293	2.99708e-11
AC004828.1-201	-1.13297	9.2374e-36
AC012378.1-201	-1.1343	3.22633e-18
PTPRG-AS1-215	-1.13435	2.54388e-37
VIPR1-AS1-227	-1.13436	7.25126e-22
ABCA9-AS1-207	-1.13497	3.58291e-55
MIR99AHG-313	-1.13517	4.39756e-30
AC009560.3-201	-1.13525	1.83874e-38
AC004982.2-202	-1.13603	4.40603e-16
AC103853.2-201	-1.13619	2.14167e-21
AC104825.1-201	-1.13631	1.31697e-25
MEG3-208	-1.13665	2.2573e-29
AC093585.1-201	-1.13673	2.91244e-18
GATA3-AS1-201	-1.13674	1.207e-30
AC091564.5-201	-1.13742	1.17898e-35
AC127526.2-202	-1.13753	3.1861e-25
RMST-212	-1.13798	2.0126e-43
AC093866.1-205	-1.13799	1.96315e-31
CR382285.2-201	-1.13809	2.68955e-27
AL359880.1-201	-1.13828	1.42857e-18
AC004889.1-201	-1.13859	2.46911e-32
CARMN-214	-1.1386	1.62654e-42
COLCA1-202	-1.13935	4.36761e-22
AC073862.5-201	-1.1395	5.29746e-43
ZNF385D-AS2-201	-1.14084	2.15988e-32
AL139383.1-201	-1.14114	2.26396e-37
AP002383.2-201	-1.14132	2.96285e-24
ARHGEF38-IT1-201	-1.14143	1.97504e-07
LINC02490-201	-1.14175	2.23071e-40
LINC02847-201	-1.14272	3.405e-36
AL161430.1-201	-1.14296	9.80198e-30
AP001528.1-202	-1.14312	1.56636e-12
KLF3-AS1-208	-1.14351	8.26089e-46
DIO3OS-212	-1.14374	4.31368e-36
AC008892.1-201	-1.14414	3.49466e-23
AC113349.1-201	-1.14419	5.0479e-29
MIR205HG-207	-1.14462	5.20551e-10
AC051619.10-201	-1.14524	1.34181e-17
LINC02700-201	-1.14526	1.80606e-50
ZBTB20-AS5-202	-1.14586	8.10012e-26
AL356266.1-201	-1.146	1.42828e-36
VIPR1-AS1-233	-1.14672	6.8323e-18
AC011503.1-202	-1.14696	4.16565e-37
AC112484.1-201	-1.1471	1.26607e-31
JPX-213	-1.14789	1.1915e-47
AC069272.1-201	-1.14858	5.02907e-33
LINC02256-201	-1.1487	6.42151e-35
AC008873.1-201	-1.14872	1.61061e-10
AC114808.2-201	-1.15008	5.69751e-21
H19-211	-1.15038	4.92297e-13
NR2F2-AS1-202	-1.1507	1.67807e-18
STARD13-IT1-201	-1.15111	2.35207e-23
STARD13-AS-237	-1.15202	3.78756e-33
AL591721.1-201	-1.15371	3.1137e-19
RBMS3-AS2-206	-1.15504	4.96564e-11
AC127526.1-201	-1.15589	7.56542e-20
MAMDC2-AS1-208	-1.15632	6.73854e-36
AC012613.1-202	-1.15642	4.35987e-22
AL161945.1-201	-1.15652	1.47748e-24
AC087260.1-201	-1.15729	3.72816e-21
AC021491.3-201	-1.15848	1.73068e-15
PXN-AS1-206	-1.15871	2.10797e-11
LINC02613-211	-1.15935	3.79408e-07
ADAMTS9-AS1-207	-1.15992	1.25371e-28
Z98884.1-201	-1.16103	2.92725e-20
AC009065.2-201	-1.16125	5.00032e-17
AC090617.6-201	-1.16145	1.252e-10
TMEM220-AS1-208	-1.16298	4.30627e-57
AC061709.3-201	-1.16305	6.01356e-39
AC019131.2-201	-1.16361	3.02829e-36
LINC00893-205	-1.16408	8.60837e-12
Z99289.1-202	-1.16586	8.6053e-19
SLC14A2-AS1-201	-1.1675	6.37515e-40
AC090625.2-201	-1.16877	3.3831e-51
AC021517.1-204	-1.16934	1.48894e-22
AP005062.1-201	-1.17018	1.52848e-18
AC129102.1-201	-1.17258	3.45084e-20
LINC02237-203	-1.17273	5.51119e-51
AC110048.2-201	-1.17369	9.0769e-44
AC131953.1-201	-1.17449	2.78638e-26
SNHG14-220	-1.17462	2.76011e-29
RBMS3-AS2-207	-1.17517	5.49132e-15
AC093766.1-203	-1.17597	2.20759e-30
MAGI2-AS3-206	-1.17673	2.05104e-38
LINC00511-209	-1.17709	1.68821e-23
AL136164.1-201	-1.17735	8.94456e-16
MEIS1-AS2-203	-1.17928	7.9455e-29
AC107072.1-201	-1.17934	1.67536e-06
PXN-AS1-203	-1.18081	2.86484e-15
MIR99AHG-306	-1.18143	1.27678e-30
AC005753.2-201	-1.1817	5.6189e-46
AC010638.1-202	-1.18227	2.87382e-32
AC022272.1-201	-1.18248	4.25131e-35
AC073862.2-201	-1.18336	3.05238e-44
AP003032.2-201	-1.18338	9.52843e-11
MIR100HG-253	-1.18379	3.73466e-10
AL512358.1-201	-1.18437	2.53322e-56
AP001554.1-201	-1.18438	4.04255e-39
MIR205HG-214	-1.1848	1.62321e-31
PCAT19-211	-1.18494	8.66744e-41
DNMBP-AS1-202	-1.18503	2.67051e-29
AC095056.1-201	-1.18529	5.934e-21
AC013549.3-201	-1.18565	3.07137e-27
LINC00113-203	-1.18622	3.2701e-16
SOCS2-AS1-206	-1.18623	1.29268e-20
AC009951.6-201	-1.18695	2.85325e-35
AC005495.2-201	-1.18832	1.56911e-40
AC011825.3-201	-1.18856	2.19836e-24
AC021517.2-201	-1.18868	3.84857e-43
ITGA9-AS1-224	-1.18913	2.65169e-41
AP000662.1-204	-1.19069	3.03403e-15
ADAMTS9-AS1-209	-1.19132	3.85497e-20
MAGI2-AS3-235	-1.19169	1.74702e-45
LINC02344-201	-1.19176	8.69515e-25
SLIT2-IT1-201	-1.19207	4.446e-30
MEG8-216	-1.19232	5.33472e-18
AC073323.1-201	-1.19346	2.50785e-30
LIVAR-201	-1.19355	8.37778e-23
AC098617.1-204	-1.1936	2.4412e-75
AL662889.1-201	-1.19461	2.74158e-16
AC009480.1-201	-1.19527	8.7418e-27
AL390783.1-203	-1.19728	5.68892e-13
MAMDC2-AS1-209	-1.19743	7.32481e-38
AC008250.1-201	-1.19758	3.92793e-26
LINC02498-201	-1.19871	3.07197e-47
TTC28-AS1-209	-1.19883	2.38155e-33
AC010201.1-201	-1.1989	1.41034e-33
AC018643.1-201	-1.19905	2.42892e-22
PLCB1-IT1-201	-1.19925	1.43462e-16
DIRC3-201	-1.19956	1.49523e-21
AC105233.5-203	-1.19958	4.99998e-32
AC008080.1-201	-1.19969	2.77332e-37
AC118658.1-201	-1.20011	2.73508e-16
AC109454.2-201	-1.20104	1.48992e-35
AL662884.5-201	-1.2012	2.506e-41
U51244.1-201	-1.20194	4.03624e-24
MIR99AHG-270	-1.20209	2.80773e-52
LINC01060-211	-1.20284	3.53622e-33
LINC00893-210	-1.20316	1.15883e-22
AL121894.2-201	-1.20318	9.68946e-28
AC092691.1-201	-1.20353	5.25451e-45
AC093903.1-201	-1.20354	5.43998e-25
LINC00472-209	-1.20365	6.35851e-17
AC007743.1-205	-1.20414	2.50844e-40
LINC00652-201	-1.20419	1.38397e-18
LINC01087-201	-1.20448	6.52694e-21
SNHG5-263	-1.20458	1.03417e-16
ADAMTS9-AS1-208	-1.20501	2.10265e-26
VIPR1-AS1-201	-1.20529	1.70868e-29
ADAMTS9-AS1-210	-1.20538	4.71132e-28
AL627232.1-201	-1.20597	2.05542e-29
AL133444.1-201	-1.20634	3.97216e-24
AC093278.2-201	-1.20637	5.78761e-32
MAMDC2-AS1-223	-1.20673	3.35121e-55
LINC00710-219	-1.20673	1.62605e-81
AL158206.1-201	-1.20684	1.08687e-40
AC004951.4-201	-1.20685	3.59486e-31
SNHG5-282	-1.20692	8.9073e-26
DNMBP-AS1-201	-1.20696	4.75027e-18
AL450345.2-203	-1.20759	6.95103e-13
LINC01152-201	-1.20767	1.71055e-05
AL589935.1-218	-1.2085	3.23574e-18
AC004080.6-201	-1.20901	5.73863e-25
AL359237.1-202	-1.20927	1.3313e-17
AC026894.1-201	-1.21071	1.25757e-28
AC108673.3-201	-1.21076	1.16616e-29
MAGI2-AS3-212	-1.21078	6.96869e-57
AC010680.5-201	-1.21098	1.2831e-25
AC091564.4-201	-1.21211	1.39573e-20
AC093766.1-212	-1.21295	1.86897e-27
PSMA3-AS1-215	-1.21385	1.90355e-07
AC015712.7-201	-1.21413	1.62975e-18
AC025165.1-203	-1.21531	5.29967e-23
MIR29B2CHG-202	-1.21562	4.59467e-32
AC012499.1-201	-1.21775	1.22841e-54
AP003059.2-201	-1.2178	1.6423e-26
AL354993.2-201	-1.21812	2.74249e-34
AL162497.1-201	-1.21898	1.66654e-19
LINC-PINT-206	-1.21899	1.1114e-27
AC092376.1-201	-1.21908	3.74207e-30
AC008268.1-201	-1.21913	1.02748e-25
MIR99AHG-284	-1.22023	7.43146e-21
FAM13A-AS1-202	-1.22027	1.63122e-33
OR2A1-AS1-205	-1.22064	1.47615e-26
LINC01402-201	-1.22073	2.70682e-22
AC078845.1-202	-1.22098	4.22534e-39
ZNF385D-AS1-201	-1.22238	2.70528e-37
AC091563.1-201	-1.22321	2.95143e-32
AC004846.2-201	-1.22414	5.49583e-22
HAND2-AS1-232	-1.22482	2.30094e-26
TBX2-AS1-201	-1.22498	1.00764e-27
C18orf12-201	-1.22577	5.73319e-22
AP003059.1-201	-1.22654	3.11224e-26
SEMA6A-AS1-203	-1.22749	5.23785e-38
AC098617.1-205	-1.22822	1.9502e-74
AC015922.2-201	-1.22832	3.32556e-27
MIR99AHG-227	-1.2284	4.94617e-25
AC026461.1-201	-1.22868	5.38074e-17
AC110491.2-201	-1.22928	1.0348e-33
MAMDC2-AS1-215	-1.22936	3.99255e-51
AC136475.1-201	-1.2294	2.61081e-18
AC016831.7-207	-1.23144	4.35783e-35
MRPS30-DT-201	-1.23154	1.98951e-27
AL592158.1-201	-1.23157	1.36554e-54
AC021766.1-201	-1.23161	2.86583e-26
AC013451.1-201	-1.23247	3.58847e-17
LINC-PINT-204	-1.2329	1.71304e-27
AC009955.4-201	-1.23337	1.53888e-16
AL450306.1-202	-1.23376	1.01155e-28
AC006115.2-221	-1.23389	7.0545e-08
AL049838.1-201	-1.23393	1.40254e-36
MUC20-OT1-311	-1.23398	1.03156e-15
AC084880.3-201	-1.23464	1.04092e-34
AP001972.5-201	-1.23471	3.92084e-30
SNHG26-205	-1.23481	8.21003e-34
AL590999.1-202	-1.23545	1.82759e-50
AC078925.1-201	-1.23558	3.35121e-55
AC093110.1-202	-1.23617	3.69174e-29
AC104407.1-201	-1.23685	1.65425e-47
AP001972.2-201	-1.23916	1.55905e-21
TEX26-AS1-206	-1.23966	2.03427e-31
AL159978.1-201	-1.24112	1.29479e-34
FGF14-AS2-201	-1.24201	2.25129e-41
AC104393.1-201	-1.24212	6.31381e-07
EGOT-201	-1.24228	5.31036e-23
AC022898.1-203	-1.24257	5.84083e-40
TBX18-AS1-210	-1.24357	1.53834e-34
AL354863.1-204	-1.2437	4.26883e-21
AC005323.2-201	-1.2442	7.92181e-23
MIR100HG-215	-1.24433	3.04334e-30
AC018635.2-201	-1.24449	3.19793e-34
MAMDC2-AS1-202	-1.24462	1.61339e-68
AC004522.3-201	-1.2449	6.32808e-17
AP003037.1-201	-1.24567	5.01123e-10
AL450344.3-201	-1.24657	1.76607e-20
AC008687.3-201	-1.2468	4.50266e-26
AC104463.2-201	-1.24748	9.40825e-19
HOXA-AS2-211	-1.24757	1.34525e-20
AC024337.2-201	-1.24778	2.77572e-94
AC007638.2-201	-1.248	1.02869e-40
SOX5-AS1-218	-1.24814	6.21851e-27
HOXD-AS2-202	-1.24851	3.50156e-26
AC110285.2-201	-1.24861	2.79358e-31
AC005237.1-201	-1.24928	4.65357e-23
PCDH9-AS4-201	-1.24975	1.88984e-46
AL355140.1-201	-1.25001	1.20694e-13
AL138999.2-201	-1.25063	4.88353e-37
LINC00337-202	-1.25217	2.19211e-27
AC008147.1-201	-1.25315	1.26616e-22
MIR29B2CHG-206	-1.25399	1.78718e-28
AL139220.2-202	-1.25439	1.24338e-08
GPC3-AS1-201	-1.25586	9.72703e-60
AC244033.2-203	-1.25711	3.20131e-22
AL589986.2-201	-1.25721	2.26022e-20
AC108519.1-201	-1.25748	5.06851e-32
AC018816.1-207	-1.25755	7.82124e-16
THSD4-AS1-202	-1.25785	1.67742e-36
AC007317.1-201	-1.25839	2.19659e-24
MIR99AHG-336	-1.25855	1.64325e-41
AL392023.2-202	-1.25862	2.4116e-30
AC063965.2-201	-1.26111	5.74324e-29
RAB11B-AS1-202	-1.26158	3.49588e-16
NAV2-IT1-201	-1.2617	2.49781e-33
AC091564.5-202	-1.26239	2.36344e-22
AC092535.4-202	-1.2641	2.12169e-14
AC036108.3-201	-1.26461	2.46605e-22
MIR100HG-209	-1.26508	2.05463e-27
STARD13-AS-221	-1.26547	9.00824e-32
LINC02381-205	-1.26563	7.28632e-19
AP000648.9-201	-1.26621	7.32811e-24
AC003991.1-210	-1.26736	7.47068e-28
LINC00893-216	-1.26778	5.64977e-25
AP000662.1-203	-1.26842	1.92889e-20
AP000962.3-201	-1.26884	1.2728e-17
AC018761.1-201	-1.26975	1.09703e-06
AC130650.1-201	-1.2704	1.54095e-24
AP001970.1-201	-1.27046	3.63023e-36
LINC02614-203	-1.27231	1.32308e-31
AC011365.1-201	-1.27246	4.79126e-42
AC110597.3-201	-1.27322	3.62604e-34
AC074024.1-201	-1.27332	2.94114e-58
AC012409.2-201	-1.27428	2.53032e-39
AP000915.1-201	-1.27506	5.55045e-32
AC008440.2-201	-1.27592	1.08075e-25
AL391883.1-201	-1.27609	5.91938e-44
TBX2-AS1-203	-1.27752	3.91589e-33
AC025271.3-201	-1.278	1.04218e-15
AC009242.1-202	-1.27857	6.16622e-44
AC018866.1-202	-1.27868	8.49907e-29
AC009034.1-201	-1.27923	7.54166e-42
UPP2-IT1-201	-1.27944	2.51658e-17
AC078842.2-202	-1.28006	3.42079e-37
SEMA5A-AS1-201	-1.28009	4.70749e-35
AL020997.2-201	-1.28032	6.10783e-26
TPT1-AS1-234	-1.28094	5.73288e-22
LINC01949-205	-1.28149	2.82238e-23
TPM1-AS-202	-1.28164	3.64339e-25
AC087427.1-201	-1.2817	3.29623e-25
AL135902.2-201	-1.28231	1.62487e-36
AC023137.1-201	-1.2835	5.35019e-19
GRK5-IT1-201	-1.28362	2.97462e-26
MAGI2-AS3-243	-1.28425	4.54224e-61
AL353586.1-201	-1.28441	5.82236e-32
AC009803.1-201	-1.28473	2.45968e-16
HOXD-AS2-203	-1.28488	2.34207e-31
Z99289.1-201	-1.28522	1.38787e-25
AC006547.1-210	-1.28742	6.56017e-07
AL021368.3-201	-1.28862	6.0035e-30
AP003306.1-201	-1.28901	2.37077e-23
LINC02753-201	-1.2896	3.80632e-51
AC008840.1-201	-1.29077	4.76668e-16
AL035447.1-201	-1.29237	3.50695e-21
AC109454.4-201	-1.2927	1.33337e-42
AC005837.4-201	-1.29438	3.81627e-19
AC022509.1-203	-1.29442	9.02137e-22
AC120498.6-201	-1.29445	1.8868e-19
ZBTB20-AS1-210	-1.29459	2.26424e-29
AL139383.1-203	-1.29473	7.4538e-25
AC004982.1-201	-1.29548	5.5297e-31
AL160153.1-201	-1.29557	3.36237e-16
ARHGAP26-AS1-202	-1.29575	5.87346e-35
WDR86-AS1-201	-1.29589	7.84068e-25
STARD13-AS-247	-1.29592	1.82475e-37
LINC02237-202	-1.29707	1.71084e-55
AC145124.1-201	-1.29759	9.20785e-28
AC090617.8-201	-1.29805	2.37282e-12
AL353763.1-201	-1.29827	2.03383e-37
SOCS2-AS1-203	-1.29849	3.57556e-23
HYMAI-201	-1.29887	3.73991e-42
AL161747.2-201	-1.29921	1.49931e-22
AC026894.1-203	-1.29948	4.70442e-30
SNHG26-201	-1.30005	4.85308e-29
AZIN1-AS1-206	-1.30008	5.08841e-16
AC084036.1-201	-1.30063	1.64612e-31
SMIM25-205	-1.30072	8.83885e-19
AC008663.3-201	-1.30148	1.07207e-42
AP000426.1-201	-1.3016	6.17748e-16
CYP4F26P-202	-1.30203	3.20885e-28
LINC02018-206	-1.30285	8.27338e-34
MIR99AHG-302	-1.30383	1.91509e-33
AP003031.1-201	-1.30419	3.65461e-14
AP003501.1-201	-1.3055	6.17765e-36
LINC01359-203	-1.30554	3.07955e-51
AL355102.1-201	-1.30664	1.15001e-19
AC100793.2-201	-1.30703	4.13312e-36
AL138963.1-201	-1.30733	1.52877e-26
AC055807.1-201	-1.30886	3.09229e-20
AC069079.1-201	-1.30986	1.51824e-22
AC005703.6-201	-1.31009	2.0732e-28
AL359233.1-201	-1.31041	6.15174e-32
AC002064.1-201	-1.31094	7.15824e-40
MAGI2-AS3-222	-1.31266	6.02452e-44
LINC01563-209	-1.31297	1.14137e-18
NR2F2-AS1-211	-1.3146	3.36004e-29
LINC01697-206	-1.31507	2.71424e-35
LINC02237-205	-1.31542	2.51154e-58
AL512643.2-201	-1.31576	3.54734e-76
AC083843.3-201	-1.3174	1.96233e-33
CALML3-AS1-201	-1.31769	2.29775e-18
ZEB2-AS1-207	-1.31829	5.96263e-24
AC008250.2-201	-1.31854	1.62705e-13
AC022898.1-202	-1.31883	3.70492e-40
AC012613.1-201	-1.31901	3.17703e-26
AL139081.1-201	-1.3191	4.83528e-27
LINC02018-203	-1.31943	5.04757e-31
AC008533.1-201	-1.32177	2.07913e-27
AC018816.1-203	-1.32204	1.36178e-19
AL355300.1-201	-1.32233	3.39693e-20
AP003117.1-201	-1.32248	2.93921e-26
SLC7A14-AS1-205	-1.32279	2.61256e-100
AL157834.2-201	-1.32313	3.26251e-27
MRPS30-DT-207	-1.32424	8.5812e-23
FLG-AS1-215	-1.3259	8.78374e-23
AC005323.2-202	-1.32659	1.88393e-21
AC103740.1-202	-1.32701	2.66662e-34
AL590999.1-201	-1.3294	2.57494e-52
THUMPD3-AS1-204	-1.32953	9.32074e-12
NR2F2-AS1-201	-1.32969	5.32155e-38
AC017067.1-201	-1.33151	1.22122e-17
AC254633.1-201	-1.33308	1.0371e-21
LINC01226-207	-1.334	5.67368e-20
SNHG14-214	-1.334	1.40215e-30
MIR100HG-275	-1.33436	7.99769e-35
AC073525.1-203	-1.3348	2.85509e-41
FAM66B-203	-1.33494	1.25736e-33
INHBA-AS1-203	-1.33513	1.12867e-25
LINC02794-203	-1.3379	7.44148e-54
AL162171.2-201	-1.33846	4.0054e-33
LINC01291-202	-1.33988	1.30312e-26
LINC00710-208	-1.34061	2.61696e-84
ARHGEF7-AS1-201	-1.34212	3.17036e-32
STARD13-AS-225	-1.34216	3.95519e-33
AC022537.1-201	-1.34235	8.14081e-23
AL445426.1-201	-1.3424	2.58373e-53
AC068587.4-207	-1.34249	1.74857e-42
AL451064.2-201	-1.34274	8.73192e-43
AC083843.4-201	-1.34275	8.0588e-37
AL354950.1-201	-1.34463	3.31254e-39
AC092645.1-201	-1.34471	1.14481e-40
AC092040.1-201	-1.34483	7.20875e-39
VIPR1-AS1-209	-1.34486	2.97528e-20
AC078909.1-201	-1.3455	1.43053e-24
AL117335.1-201	-1.34581	8.35251e-20
ARHGEF7-AS2-201	-1.34661	4.37509e-62
AC025265.1-201	-1.34749	5.60476e-35
MEG8-233	-1.34796	2.15326e-35
Z82198.2-201	-1.34801	9.92812e-39
LINC02580-205	-1.34894	4.85191e-48
AC120498.2-201	-1.34985	2.99073e-26
CHL1-AS2-202	-1.35003	1.22344e-44
LINC02157-202	-1.35023	5.76762e-47
LINC02510-201	-1.35037	1.47415e-60
AL121902.1-201	-1.35052	1.50921e-26
KLF3-AS1-215	-1.35086	4.48462e-41
AC024909.1-201	-1.35108	2.68955e-27
HOXD-AS2-201	-1.35221	1.33099e-38
AC026150.1-201	-1.35378	3.98054e-37
AC092053.2-201	-1.35399	1.92645e-56
LINC00710-201	-1.35437	3.12502e-99
LINC01482-204	-1.35592	3.69418e-36
ROCR-202	-1.35646	8.09319e-05
AC009242.1-201	-1.35653	3.60426e-58
AC119424.1-201	-1.35822	8.51955e-15
LINC02613-212	-1.36034	8.02639e-13
AL031846.2-201	-1.36314	7.16779e-45
AC025431.1-201	-1.36327	4.54224e-61
H19-202	-1.36388	1.94783e-07
LINC02761-201	-1.36395	9.49171e-26
AC068888.1-205	-1.36407	4.59643e-35
FAM198B-AS1-201	-1.36434	7.52435e-27
AC025265.3-201	-1.36568	8.22623e-46
MEG8-215	-1.36734	1.31437e-32
LINC01883-201	-1.36759	5.83971e-07
AP001528.2-201	-1.37006	4.36308e-50
AC093110.1-201	-1.37039	1.03107e-29
CCDC39-AS1-201	-1.37114	7.77534e-37
THSD4-AS1-208	-1.37176	2.55362e-42
DIO3OS-205	-1.37279	1.75042e-41
AC051619.7-201	-1.37391	1.03111e-24
ARHGAP26-AS1-203	-1.37488	2.55033e-28
LINC02018-215	-1.37496	4.41069e-30
LINC02006-203	-1.37557	7.10458e-39
AC121247.1-201	-1.37562	1.55332e-21
LINC01359-212	-1.37651	5.62782e-55
MEG3-222	-1.37686	3.16853e-28
AP000857.2-201	-1.37687	8.69702e-35
LINC00504-202	-1.37775	2.95454e-33
GAS1RR-202	-1.37801	7.14675e-40
AC093297.1-201	-1.37847	7.64258e-32
AC090517.3-201	-1.3792	7.25226e-10
AC138150.1-202	-1.37949	1.06361e-29
KAZN-AS1-203	-1.38018	2.24574e-24
ELN-AS1-201	-1.38024	1.3534e-14
AL034374.1-201	-1.38079	1.19138e-42
AC026333.3-201	-1.38167	3.36811e-25
STARD13-AS-249	-1.38415	8.72405e-40
AP001094.1-201	-1.38513	1.41006e-13
AL445465.1-205	-1.38541	7.82431e-38
CRIM1-DT-201	-1.38587	1.47273e-27
AP005212.4-201	-1.3861	7.22591e-43
AC091151.5-201	-1.38667	8.42895e-13
LINC00472-213	-1.38727	6.25889e-18
AL358053.1-201	-1.38808	8.14847e-40
TBX18-AS1-201	-1.38833	1.90319e-42
NR2F2-AS1-203	-1.38881	1.4657e-36
LINC02456-201	-1.38991	1.05823e-34
AC093575.1-201	-1.3901	1.74411e-46
SLC7A14-AS1-202	-1.39172	2.20278e-94
AC010136.1-201	-1.39332	2.71749e-31
SEMA6A-AS1-205	-1.39627	2.36886e-33
MIR99AHG-292	-1.39629	2.21344e-47
Z99289.1-206	-1.39738	5.69188e-22
AP000915.2-201	-1.39745	2.50801e-23
MUC20-OT1-328	-1.39798	9.69639e-27
AL354993.1-201	-1.3995	9.24011e-48
MAMDC2-AS1-206	-1.39968	5.12593e-67
ARMC2-AS1-201	-1.39973	1.49437e-09
PTPRG-AS1-207	-1.40016	6.28362e-36
AC008080.2-201	-1.40112	7.52095e-39
AC069444.1-201	-1.40136	4.52837e-34
AC073573.1-201	-1.40149	1.40668e-31
MYLK-AS1-201	-1.40208	7.4225e-30
MYLK-AS1-207	-1.40341	7.64177e-35
TMEM26-AS1-201	-1.40351	1.15893e-30
THSD4-AS1-204	-1.40363	7.65342e-37
AL356218.2-201	-1.40513	8.73189e-17
AL365271.1-201	-1.4056	2.52017e-38
AC091906.1-201	-1.40719	7.59909e-31
AC106897.1-204	-1.40823	3.73069e-24
AC097515.1-201	-1.40975	1.86617e-43
SMC5-AS1-201	-1.41216	3.30924e-47
FP671120.11-201	-1.41253	9.64808e-06
MIR100HG-212	-1.41362	4.45939e-33
AC027279.3-201	-1.41585	1.54193e-10
AL358612.1-201	-1.41765	5.86381e-41
AL031386.1-201	-1.41799	2.5883e-12
AC007849.1-201	-1.4185	2.66401e-24
PTPRG-AS1-208	-1.41877	1.84827e-19
AC093535.1-204	-1.41883	1.15796e-32
PTPRG-AS1-216	-1.42018	6.95268e-22
AC012613.2-201	-1.42183	3.55471e-36
AP001825.1-201	-1.42183	4.29744e-30
MEG8-202	-1.42318	9.66493e-25
AC027335.1-201	-1.4251	2.27351e-28
MEG8-249	-1.42674	3.07366e-36
AC005486.1-201	-1.42939	2.06262e-16
ZBTB20-AS2-201	-1.4308	7.99734e-31
FAM198B-AS1-204	-1.43088	4.03674e-23
SOX9-AS1-203	-1.43098	3.30315e-06
IQCJ-SCHIP1-AS1-202	-1.43157	1.39347e-15
MAMDC2-AS1-217	-1.43212	9.66144e-56
AC131025.2-201	-1.43256	8.64497e-16
NR2F1-AS1-231	-1.43398	4.36237e-59
AC078993.1-202	-1.43411	5.91744e-38
AC084082.1-209	-1.43572	6.42068e-17
AC023595.1-201	-1.43607	7.28164e-73
AC060234.1-201	-1.43661	1.78125e-28
AC003991.1-211	-1.43689	3.8681e-22
AP000926.2-201	-1.43795	7.79536e-35
LINC00710-210	-1.43967	1.5095e-79
MAMDC2-AS1-201	-1.44278	1.33923e-46
AC007563.2-201	-1.44352	3.40019e-15
AC098859.2-201	-1.44456	3.31264e-31
AC106845.1-202	-1.44657	2.90139e-51
MIR381HG-201	-1.45021	8.23559e-36
AC141002.1-201	-1.45227	5.7782e-27
AC027335.2-201	-1.45311	2.47473e-27
AC244100.2-202	-1.45543	6.18101e-44
RORA-AS1-205	-1.45552	1.02829e-36
AL109741.1-201	-1.45864	6.51931e-26
STARD13-AS-227	-1.45932	7.0669e-39
AP005233.2-201	-1.4603	5.32362e-13
AC010638.1-203	-1.46086	2.09997e-39
MEG3-213	-1.46098	3.06008e-56
AC010638.1-201	-1.46193	2.86569e-28
AL161773.1-201	-1.46314	1.30657e-29
MAMDC2-AS1-207	-1.46426	7.47827e-64
AC074124.1-201	-1.46689	4.36737e-24
AC018816.1-206	-1.46801	7.63525e-32
AC011389.1-206	-1.46878	1.74807e-39
RAMP2-AS1-204	-1.46942	1.84379e-66
AL158147.1-201	-1.46999	1.20693e-10
AC090371.2-205	-1.47145	2.29527e-51
AC096921.2-201	-1.47247	4.89967e-36
LINC01891-201	-1.47292	9.67131e-33
NR2F2-AS1-209	-1.47411	1.41089e-58
AC006355.2-201	-1.47694	1.76369e-30
PABPC5-AS1-201	-1.47751	1.52366e-43
MIR29B2CHG-207	-1.47822	9.87936e-64
AL590807.1-204	-1.47975	9.70624e-93
AL512310.11-201	-1.47977	4.89471e-08
AL121957.1-202	-1.48093	2.29526e-27
MAGI2-AS1-201	-1.48313	1.12036e-48
AC004241.2-201	-1.48343	3.56403e-38
AC110597.3-202	-1.48474	1.71641e-35
AC009806.1-201	-1.48478	9.19811e-52
LINC00710-224	-1.48522	9.46658e-97
MEG8-201	-1.48571	2.84246e-33
MIR99AHG-337	-1.48772	3.17339e-47
AC009560.4-201	-1.48885	3.17373e-48
SEMA6A-AS2-201	-1.48908	2.09232e-33
FAM66D-201	-1.48955	5.89606e-41
MIR100HG-221	-1.4901	7.17991e-30
SOCS2-AS1-204	-1.49194	2.79844e-29
AC073140.1-201	-1.49297	4.202e-10
CELF2-AS2-214	-1.49379	7.893e-70
H19-201	-1.49464	1.60524e-14
AC104407.1-202	-1.4947	1.9024e-53
AC096733.1-201	-1.4954	8.92966e-26
AL161668.4-201	-1.49577	7.09252e-17
MEG3-219	-1.49581	1.00147e-31
AL391840.3-201	-1.49624	1.26981e-44
AC055736.1-201	-1.49755	5.55132e-08
LINC00710-245	-1.49897	2.11608e-101
AP003043.1-201	-1.49901	1.2704e-45
LRP1-AS-202	-1.49953	9.21378e-27
Z82249.1-201	-1.49995	1.13152e-33
AC025569.1-207	-1.50302	1.86353e-32
AC005495.1-201	-1.50483	5.85124e-63
AC093010.3-201	-1.50551	3.43125e-34
LINC02614-208	-1.50763	1.13531e-23
AC117509.1-201	-1.50783	2.05588e-21
AL117190.1-201	-1.51151	2.65751e-63
AC095030.1-201	-1.51586	1.1679e-28
MEG8-226	-1.51689	7.52938e-44
LINC01140-207	-1.51707	5.75347e-31
AC044810.2-202	-1.51783	1.3041e-34
LINC01151-201	-1.5188	1.49662e-30
MALAT1-212	-1.51967	1.06851e-18
AP006248.2-201	-1.51999	3.98054e-37
EPB41L4A-AS1-204	-1.5225	1.0595e-23
MIR99AHG-251	-1.52284	1.7263e-34
AC079296.1-204	-1.52299	3.92944e-30
AC020891.1-201	-1.52363	2.49929e-15
MIR497HG-201	-1.52794	7.30989e-51
AC093535.1-203	-1.52871	8.93638e-35
FLNC-AS1-201	-1.53014	5.55221e-31
AC051649.1-201	-1.53362	1.9838e-24
AC108058.1-201	-1.53362	2.919e-40
MIR205HG-202	-1.53391	2.27533e-11
AC002546.1-201	-1.53429	3.36507e-31
RBMS3-AS2-201	-1.53452	5.03535e-31
AL590807.1-202	-1.53466	5.02667e-98
LAMC1-AS1-201	-1.53522	9.46934e-38
AC116456.1-201	-1.53545	2.61256e-100
MIR205HG-206	-1.53686	2.1733e-12
MALAT1-201	-1.538	2.61907e-11
AC015922.3-201	-1.53833	3.20816e-35
MIR99AHG-294	-1.53856	2.94839e-44
LINC02396-201	-1.54077	2.80169e-30
LYPLAL1-AS1-205	-1.54111	1.10332e-31
AC008914.1-201	-1.54124	3.49489e-39
AP000527.1-202	-1.54922	1.81809e-20
AC124854.1-201	-1.55033	4.62235e-42
RBMS3-AS2-202	-1.55049	1.20194e-47
AC022726.2-201	-1.55231	2.1724e-27
AL590999.1-204	-1.55267	1.6693e-46
AL357500.1-201	-1.55353	3.32998e-27
LINC02607-206	-1.5537	5.84986e-35
AC092667.1-201	-1.55406	1.42358e-40
AC116456.1-202	-1.55483	5.89986e-91
AC073957.2-201	-1.55593	1.02746e-47
AP006621.1-202	-1.55706	4.60737e-27
AC091563.1-202	-1.55797	8.14346e-34
FAM198B-AS1-203	-1.55819	7.26756e-37
AL020994.3-201	-1.55865	2.51433e-27
AC078925.4-201	-1.55919	5.64953e-55
AC108477.1-201	-1.55969	8.21632e-67
AC079848.1-202	-1.55975	9.44458e-40
MIR205HG-211	-1.55995	1.22644e-12
Z69667.1-202	-1.56202	7.60731e-21
SLC7A14-AS1-201	-1.56462	2.58526e-85
AL355073.2-201	-1.56492	3.09782e-64
SEMA6A-AS1-202	-1.56522	6.87061e-39
CNTN4-AS2-201	-1.56872	2.19446e-22
AC114488.1-202	-1.56938	1.07224e-26
MIR99AHG-289	-1.57053	1.91043e-36
FGF14-AS1-201	-1.57288	3.45186e-34
XIST-218	-1.57483	5.11663e-15
AC005753.1-201	-1.57488	4.69543e-37
AC135178.2-201	-1.57497	1.41031e-38
AC022726.1-201	-1.57771	4.02013e-18
AC245060.5-201	-1.57782	1.45665e-27
AL161457.1-201	-1.58033	4.54871e-71
AL355073.1-201	-1.58041	2.38095e-45
AC025280.1-201	-1.5809	2.48226e-20
LINC00710-249	-1.58983	2.51096e-109
AL445465.2-201	-1.59043	9.70303e-38
FGF14-AS1-202	-1.59066	1.34912e-36
MEG8-210	-1.59113	3.02428e-26
AL353693.1-201	-1.59128	1.18297e-30
AC068888.1-208	-1.59146	5.71636e-37
MEG8-239	-1.59159	8.92993e-31
AC011389.1-202	-1.59651	5.14606e-36
VIPR1-AS1-211	-1.59772	2.34784e-24
AL929601.1-202	-1.59817	5.62668e-19
LINC00113-201	-1.59879	1.92225e-13
AC114808.1-201	-1.59974	2.11892e-34
AL590999.1-205	-1.60004	2.80965e-38
AL590999.1-203	-1.60047	9.12024e-45
AL133383.1-203	-1.60141	3.92838e-33
AC103740.1-203	-1.60272	6.04903e-36
MIR99AHG-308	-1.60347	6.96634e-52
LINC01482-203	-1.60506	8.5334e-40
AC092839.1-201	-1.60633	2.20718e-35
AC025165.1-201	-1.60654	2.40312e-46
AC092839.2-201	-1.6067	1.93413e-31
RAMP2-AS1-201	-1.60682	4.96299e-41
AL050320.1-201	-1.60699	7.01106e-31
AC090236.1-201	-1.60712	1.14384e-38
AC092053.3-201	-1.60713	2.72556e-54
GARS-DT-210	-1.6075	3.28329e-18
MEG3-201	-1.6075	6.94583e-63
AC087242.1-201	-1.6084	2.68307e-44
MIR99AHG-339	-1.60886	1.09483e-42
AP001363.2-201	-1.60941	4.60401e-46
LINC00989-209	-1.61141	1.38779e-44
AC062004.1-201	-1.61233	5.93404e-54
LINC02202-203	-1.61435	3.10552e-42
AL357078.2-201	-1.61594	2.78861e-46
AC010480.1-201	-1.61647	9.03614e-36
AC092683.1-215	-1.62093	1.25923e-24
AC092111.2-201	-1.62359	4.11695e-37
LINC00504-203	-1.62467	2.8753e-27
AL357873.1-201	-1.62633	7.38786e-43
LINC01060-206	-1.63114	9.32666e-20
AC095055.1-201	-1.63273	2.46259e-65
MRGPRF-AS1-202	-1.63568	1.34924e-45
AC118282.4-201	-1.63801	1.1526e-30
AC016825.1-201	-1.63821	8.51808e-33
AC005301.1-201	-1.64075	5.10346e-34
AP000785.1-201	-1.6411	4.06424e-25
AC021088.1-201	-1.64142	8.35756e-30
AC004054.1-201	-1.64167	3.83642e-24
SNHG5-256	-1.64217	8.95497e-42
MIR99AHG-263	-1.64332	1.4784e-46
SLC16A12-AS1-202	-1.64477	3.83816e-70
AC008945.1-201	-1.64544	1.02562e-17
MEG3-220	-1.64713	1.71496e-56
MIR29B2CHG-203	-1.6474	8.90797e-44
AC005726.4-201	-1.65177	1.69518e-25
TRHDE-AS1-207	-1.65269	1.5054e-65
AL354863.1-206	-1.6541	5.58659e-23
MAMDC2-AS1-204	-1.65578	6.73241e-55
CARMN-208	-1.65854	9.43615e-31
NR2F2-AS1-208	-1.65979	5.98086e-37
LINC01226-204	-1.66	6.12061e-23
AC011389.1-203	-1.66018	1.66581e-34
MEG8-208	-1.6604	1.23166e-40
AP000962.1-201	-1.66306	3.34435e-45
PRICKLE2-AS2-201	-1.66332	2.95917e-40
NEAT1-208	-1.66352	6.92478e-07
AC005550.2-201	-1.66366	7.15712e-57
AC005753.3-201	-1.6641	6.47034e-46
MAMDC2-AS1-212	-1.66493	7.51021e-68
AC007744.1-201	-1.66706	9.13568e-70
AC051619.8-201	-1.66708	1.70239e-16
MIR99AHG-231	-1.66805	4.69495e-56
AL356218.2-206	-1.66952	4.72872e-25
AC055854.1-201	-1.67581	1.09122e-30
LINC02607-203	-1.67863	1.15432e-57
NR2F2-AS1-214	-1.67934	4.54959e-52
AC098617.1-215	-1.67946	1.06398e-91
AUXG01000058.1-201	-1.67973	2.6852e-48
AC011389.1-205	-1.68027	6.01711e-49
XIST-219	-1.68075	1.04423e-20
HOXB-AS1-202	-1.68114	2.49464e-32
AC011389.1-201	-1.6823	6.95218e-43
AC007319.1-201	-1.68283	9.03653e-44
AC011239.2-201	-1.69651	1.75364e-68
AC007637.1-201	-1.6969	2.07021e-46
AC011389.1-209	-1.69691	9.75014e-47
AC078842.2-201	-1.69713	6.47034e-46
NR2F2-AS1-215	-1.70605	7.96306e-68
MEG8-209	-1.70749	1.87176e-35
ARMCX5-GPRASP2-207	-1.71346	7.33411e-56
SNHG5-240	-1.71466	2.60903e-29
AL133481.1-201	-1.71794	8.61154e-33
AC011389.3-201	-1.71806	1.71931e-46
AC093535.1-202	-1.7188	2.11942e-52
MIR99AHG-293	-1.7212	1.61145e-42
AC006487.1-201	-1.72188	4.62193e-50
AL354950.3-201	-1.72944	8.05821e-50
MIR99AHG-212	-1.73148	2.75109e-35
AL445426.1-203	-1.73597	1.39018e-74
AL121957.1-201	-1.73757	3.94116e-26
MAGI2-AS3-213	-1.73837	3.86324e-64
MIR100HG-214	-1.7388	1.30521e-37
AL357873.1-202	-1.74171	2.69815e-43
ISM1-AS1-201	-1.74852	6.80979e-34
AL163636.1-201	-1.75116	2.07677e-50
MIR99AHG-303	-1.75184	1.63401e-47
AC007036.3-201	-1.75237	3.57374e-48
AC036108.1-201	-1.75436	1.48233e-17
LYPLAL1-AS1-201	-1.75625	3.51748e-35
AC064799.2-202	-1.75778	5.68632e-34
AC069023.1-201	-1.75802	7.75001e-17
NLGN1-AS1-201	-1.76062	3.47442e-60
AC000050.1-201	-1.76158	1.48168e-23
AC012409.4-201	-1.76228	2.19513e-32
AC109927.1-203	-1.76327	7.70491e-33
MAGI2-AS3-215	-1.76738	1.1407e-52
NR2F2-AS1-213	-1.77151	1.63108e-64
AC108734.4-201	-1.77152	1.83228e-55
AC007378.1-201	-1.77197	8.50005e-50
RBMS3-AS2-205	-1.77432	3.9583e-51
MAGI2-AS3-220	-1.77451	1.32411e-54
GNG12-AS1-204	-1.77551	7.11253e-32
AC062004.1-202	-1.77856	5.57389e-22
MIR99AHG-326	-1.77947	4.21921e-42
EGFLAM-AS1-201	-1.78533	1.04013e-38
AC067817.1-201	-1.78546	9.22666e-39
MYLK-AS1-204	-1.78823	2.32303e-31
XIST-216	-1.78907	1.31488e-14
AL078645.1-201	-1.78949	1.92356e-34
MIR205HG-204	-1.79054	6.34449e-41
AC087623.1-201	-1.79681	2.43532e-31
AC087482.1-207	-1.79748	3.48364e-41
ANO1-AS1-201	-1.79896	9.74804e-24
PCDH9-AS2-202	-1.80016	7.60915e-31
SEMA6A-AS1-201	-1.80208	6.77813e-42
AC102945.2-201	-1.80512	5.00084e-41
CHL1-AS2-201	-1.80978	1.56037e-61
AC025038.1-201	-1.8123	4.19175e-38
CHL1-AS1-201	-1.81539	3.07955e-51
AC011389.1-210	-1.81943	1.66621e-40
AC000032.1-201	-1.82099	1.42254e-22
AL445426.1-205	-1.82318	3.92699e-71
RBPMS-AS1-201	-1.82407	1.62872e-57
AC104237.3-201	-1.82758	6.63378e-39
AC083809.1-201	-1.82764	1.1176e-39
BX664727.3-202	-1.82824	7.93318e-44
AL391097.1-201	-1.82824	8.50592e-56
AC025259.3-201	-1.82954	1.48095e-25
TRHDE-AS1-201	-1.82968	7.63089e-68
AGAP11-201	-1.83687	3.26488e-60
AC137056.1-201	-1.83737	5.06851e-32
AC026461.2-201	-1.83864	1.57966e-21
MAMDC2-AS1-214	-1.83867	1.48628e-87
AC026461.3-201	-1.84312	6.66602e-32
AP003501.2-201	-1.8437	2.54481e-35
MAMDC2-AS1-203	-1.84557	3.38653e-35
AL353699.1-201	-1.84723	2.31083e-27
AC117505.1-202	-1.84808	1.53116e-08
AP001172.2-201	-1.84824	1.0021e-35
LIFR-AS1-213	-1.85078	1.402e-75
ADGRD1-AS1-202	-1.85172	1.07814e-48
KCNIP2-AS1-201	-1.85467	9.38913e-49
AC012409.3-201	-1.85481	5.12442e-62
AL354949.1-201	-1.85516	2.46153e-18
TRHDE-AS1-218	-1.85529	5.51195e-64
AC012404.2-201	-1.85777	2.19693e-40
AL157996.1-201	-1.8602	5.08238e-90
MIR99AHG-266	-1.86123	2.52017e-38
AC008667.2-201	-1.86375	1.6802e-35
AP006565.1-201	-1.86449	5.78369e-21
MIR100HG-201	-1.86487	2.1026e-30
LINC02224-203	-1.87059	8.1296e-76
MAMDC2-AS1-210	-1.87151	9.95956e-62
hsa-mir-423.1-201	-1.87191	9.52288e-13
AC092542.1-201	-1.8729	9.61362e-46
AP001599.1-201	-1.87558	3.53862e-48
LINC02511-202	-1.87698	3.554e-43
AC003991.1-214	-1.88746	3.1628e-27
SYNE1-AS1-201	-1.89282	6.05808e-46
AC008011.2-201	-1.9028	1.4433e-30
AC012404.1-201	-1.90414	1.68161e-39
AC098617.1-203	-1.9077	9.04639e-60
AC112503.1-201	-1.9117	1.15538e-45
MIR99AHG-321	-1.91245	3.8429e-50
LINC01359-220	-1.91287	1.91555e-56
AC073591.1-201	-1.92193	2.7771e-47
CELF2-AS2-213	-1.92348	1.43202e-63
AL356124.1-201	-1.93281	9.52091e-62
MEG8-207	-1.93405	1.35963e-34
RBMS3-AS1-201	-1.93455	3.96517e-56
LINC02753-202	-1.93515	2.2153e-53
AC073050.1-201	-1.93542	2.50975e-64
AC011444.1-201	-1.9443	2.41211e-52
AC100793.4-201	-1.94614	3.48323e-68
AL513164.1-201	-1.94745	4.26199e-37
HSD11B1-AS1-202	-1.95228	1.85943e-40
MIR99AHG-256	-1.95534	3.89922e-51
LMO7DN-IT1-201	-1.95661	6.43035e-52
AC009320.1-201	-1.95691	2.66084e-44
AC087623.3-201	-1.96169	2.61616e-49
AL391097.2-201	-1.96484	3.19229e-43
LINC02580-203	-1.96518	7.66276e-64
AC025259.3-202	-1.96693	5.67892e-33
AC010457.1-201	-1.96756	1.0143e-65
AC003991.1-212	-1.96804	4.86422e-23
CELF2-AS2-211	-1.96819	3.38257e-70
AC064799.2-201	-1.96914	2.11217e-35
AC098679.6-201	-1.9734	1.18202e-33
MIR99AHG-248	-1.97718	6.47639e-49
AL732437.1-201	-1.98446	8.59121e-22
AL033504.1-203	-1.99071	1.10959e-42
AL162591.2-201	-1.99145	1.88477e-49
AC004241.1-201	-1.99163	9.37045e-73
AC011389.2-201	-1.99837	5.42625e-35
AL033504.1-201	-2.00536	1.67384e-54
AC078993.1-201	-2.00625	1.31434e-35
MIR205HG-203	-2.00638	1.20867e-24
AC011444.3-201	-2.0112	4.95003e-52
AC136424.2-201	-2.01561	1.69619e-44
C11orf40-201	-2.01684	1.6988e-57
LINC01359-213	-2.02743	1.50001e-54
AC100823.1-201	-2.02759	1.52283e-31
AC004597.1-201	-2.03214	3.1447e-58
AC009570.2-201	-2.0367	5.7734e-15
AL590999.1-206	-2.03878	2.62847e-48
FAM198B-AS1-205	-2.04747	4.10345e-38
AP001172.1-201	-2.04865	8.66102e-48
MEG3-202	-2.05184	1.06539e-39
KCNAB1-AS2-201	-2.05218	4.22684e-64
AL445426.1-204	-2.05574	9.51718e-61
CADM3-AS1-201	-2.05903	3.3348e-57
LINC02066-201	-2.06153	5.10045e-54
AL359382.1-201	-2.07333	1.25605e-46
NR2F2-AS1-205	-2.07494	1.89944e-69
AC002064.2-201	-2.08712	4.71594e-38
CARMN-201	-2.0899	1.1291e-53
AC104237.1-201	-2.09162	1.29514e-42
AC003688.2-201	-2.0959	2.23427e-46
AL513217.1-201	-2.10406	5.29291e-31
AC068888.1-220	-2.10449	6.14137e-56
AC109927.1-201	-2.11018	7.28254e-24
AL391097.3-201	-2.11252	1.07165e-50
TAT-AS1-202	-2.1312	2.85862e-32
AC018680.1-202	-2.13786	8.92504e-28
MRPS30-DT-205	-2.14167	8.90615e-31
AP003071.3-201	-2.14167	2.79082e-36
LIFR-AS1-203	-2.14416	3.06191e-66
CELF2-AS2-209	-2.14421	1.49144e-72
PGR-AS1-202	-2.14483	1.97234e-65
ABCA9-AS1-205	-2.14494	1.41473e-59
AC002398.2-201	-2.14615	2.71588e-51
AC012409.1-202	-2.15117	9.382e-51
CARMN-205	-2.15794	5.51347e-48
ACTA2-AS1-203	-2.15845	4.44234e-36
CADM3-AS1-202	-2.16339	2.093e-40
AC097713.1-201	-2.16568	1.02935e-62
AL359382.2-201	-2.16865	3.83413e-39
AL691459.1-201	-2.17418	2.64721e-53
LINC02224-202	-2.1743	1.8055e-74
AC012409.1-201	-2.18421	1.30935e-54
CELF2-AS2-212	-2.19201	1.39097e-69
AC003991.1-201	-2.19708	6.77597e-23
AC021491.1-201	-2.2021	5.22941e-44
CARMN-211	-2.20309	2.5081e-46
AC044810.2-203	-2.20424	9.26507e-36
AC036108.2-201	-2.2058	2.70918e-20
ADAMTS9-AS2-204	-2.22319	7.36108e-78
LINC01359-202	-2.22452	6.60775e-64
AADACL2-AS1-202	-2.23995	5.32225e-39
AC079296.2-201	-2.24186	5.33726e-41
MEG3-212	-2.24679	9.61362e-46
AC016595.1-201	-2.24784	2.38561e-15
AC104237.2-201	-2.24863	1.43379e-37
MEG3-210	-2.25217	6.62471e-36
AL445123.1-201	-2.26789	5.17098e-45
UBL7-AS1-203	-2.27425	5.83705e-30
LINC00377-202	-2.27572	5.9613e-106
CARMN-209	-2.28335	1.76151e-48
CARMN-210	-2.28919	6.57584e-48
AC010457.1-202	-2.29034	1.67337e-62
AL445183.1-201	-2.2911	3.61595e-33
AL121904.1-202	-2.2943	9.44636e-28
AL356124.2-201	-2.30476	2.76202e-50
AC044810.3-201	-2.31362	1.8489e-41
DMD-AS3-201	-2.32408	6.62511e-53
AL033504.1-204	-2.32598	4.16724e-47
AC007319.1-203	-2.3299	2.081e-41
RBMS3-AS3-201	-2.34779	2.90045e-76
RERG-AS1-201	-2.35032	2.10779e-30
AL355994.3-201	-2.36108	3.04735e-25
AL136369.2-201	-2.37793	1.02398e-87
CELF2-AS2-210	-2.38139	6.16556e-69
AL445123.2-201	-2.3882	1.80822e-43
MIR205HG-208	-2.38855	1.07425e-43
AC138331.1-201	-2.39282	1.99377e-48
AL354950.2-201	-2.39445	7.45311e-44
AC136424.1-201	-2.39813	1.54298e-49
AP001528.1-201	-2.40103	3.67292e-57
AP005019.1-201	-2.40704	8.65619e-72
RERG-IT1-201	-2.41181	1.71067e-34
AL078582.2-201	-2.43028	3.11832e-51
AL512643.1-201	-2.43135	1.87274e-69
AF181450.1-201	-2.43138	2.0545e-46
AL356218.2-204	-2.43863	1.70924e-42
AC093838.1-201	-2.44849	4.80898e-27
ADAMTS9-AS2-202	-2.46232	2.50281e-94
AC011239.1-201	-2.46792	3.10047e-67
AL109930.1-201	-2.47567	9.10562e-48
AC008663.1-201	-2.47778	8.96947e-44
CARMN-207	-2.48309	4.47347e-50
AL135926.1-201	-2.50773	8.50005e-50
LINC01589-201	-2.53829	2.59952e-72
AF001548.2-201	-2.58794	1.01707e-44
AC011365.2-201	-2.58835	3.07452e-50
ACTA2-AS1-202	-2.61438	8.1027e-59
NEAT1-209	-2.62317	1.75955e-22
AL359317.1-201	-2.63107	1.01761e-72
AC006159.1-201	-2.63834	6.57474e-59
TAT-AS1-201	-2.65341	6.49156e-40
AC011444.2-201	-2.65858	8.62005e-67
AC108861.1-201	-2.68284	1.84328e-48
MME-AS1-201	-2.68363	2.22103e-58
LINC00632-226	-2.69707	1.1789e-35
LINCADL-201	-2.71914	5.73534e-53
ADIRF-AS1-203	-2.72848	4.60442e-56
BX927359.1-201	-2.7291	1.57306e-57
AC011632.1-203	-2.75677	7.16903e-40
FGF10-AS1-201	-2.75853	2.27526e-91
ABCA9-AS1-206	-2.7679	5.89792e-69
AL136369.1-201	-2.7881	8.99077e-64
ADAMTS9-AS2-203	-2.82957	4.02138e-90
AP003555.2-201	-2.8452	2.08476e-54
CARMN-215	-2.88482	1.6549e-59
LINC00632-206	-2.89153	3.7514e-34
AL162408.1-201	-2.89668	2.33777e-62
ADAMTS9-AS2-205	-2.92268	8.8178e-95
AL513217.1-202	-2.95777	4.75565e-59
AP002518.2-201	-2.97921	1.11134e-40
LINC00632-211	-2.98179	1.05136e-35
AL079343.1-201	-3.01138	1.42357e-109
AC008040.1-202	-3.10203	1.04975e-67
AP002755.1-201	-3.11552	4.26199e-37
ABCA9-AS1-203	-3.11656	7.33529e-74
AL356311.1-201	-3.15239	5.29493e-43
AC132217.1-201	-3.17454	1.18738e-37
ABCA9-AS1-204	-3.2071	2.24378e-70
AC244100.2-201	-3.27101	1.30276e-27
ADIPOQ-AS1-201	-3.2741	6.52094e-55
ABCA9-AS1-201	-3.34958	1.16562e-74
AF001548.1-201	-3.54382	4.51315e-49
LIPE-AS1-208	-3.84409	2.9427e-51
NEAT1-205	-3.84959	6.58561e-34
AC098617.1-201	-3.8994	2.03397e-81
AL021026.1-202	-3.90147	2.79893e-35
AC020907.2-201	-4.11592	6.89268e-92
AP002026.1-209	-4.19087	1.9502e-74
AL157387.1-201	-4.97762	3.58912e-34
