# Supplementary material for: LncRNA-Based Classification of Triple Negative Breast Cancer Revealed Inherent Tumor Heterogeneity and Vulnerabilities
Source: Noncoding RNA. 2022 Jun 21;8(4):44. doi: 10.3390/ncrna8040044 (PMC9326727; doi:10.3390/ncrna8040044)
Supplement: Supplementary file 1 [file ncrna-08-00044-s001.zip › Supplementary table S2.xlsx]

## Sheet: FinalMarkerHeatmap
Supplementary table S2. Iterative Clustering and Guide-gene Selection (ICGS) classification of TNBC and normal BC
UID	row_clusters-flat
column_clusters-flat
LINC00511-263	0
LINC00511-259	0
LINC00511-277	0
LINC00511-248	0
LINC00511-303	0
LINC00511-301	0
LINC00511-220	0
LINC00511-210	0
LINC00511-249	0
LINC00511-276	0
LINC00511-235	0
LINC00511-293	0
LINC00511-242	0
LINC00511-278	0
LINC00511-207	0
LINC00511-300	0
AC007639.1-201	0
LINC00511-256	0
LINC00511-257	0
LINC00511-305	0
LINC00511-215	0
LINC00511-289	0
LINC00511-218	0
LINC00511-251	0
LINC00511-275	0
LINC00511-238	0
LINC00511-304	0
LINC00511-250	0
LINC00511-296	0
LINC00511-260	0
LINC00511-279	0
LINC00511-236	0
SNHG16-204	0
AP000697.1-201	0
DIAPH3-AS1-202	0
FOXC2-AS1-201	0
FOXCUT-202	0
PRC1-AS1-203	0
AL354864.1-201	0
AL049629.1-201	0
TYMSOS-201	0
PRC1-AS1-205	0
FOXCUT-201	0
DIAPH3-AS1-204	0
AC005540.1-201	0
PRC1-AS1-202	0
YEATS2-AS1-201	0
PRC1-AS1-206	0
AC123768.5-201	0
INHBA-AS1-205	0
SGO1-AS1-202	0
AL133477.2-201	0
AC008870.3-201	0
AC090673.1-201	0
AC002563.1-201	0
AC020907.1-203	0
AL049569.2-201	0
AC112721.2-201	0
E2F3-IT1-201	0
DIAPH3-AS2-201	0
LINC00393-206	2
LINC00393-204	2
LINC00393-205	2
LINC00393-210	2
LINC00393-202	2
LINC00393-201	2
LINC00393-209	2
AL162376.1-201	2
LINC00392-203	2
LINC01956-202	2
AP001783.1-202	2
AP001783.1-201	2
LINC01956-201	2
AL360007.1-201	2
AC007132.1-201	2
KIRREL3-AS1-201	2
AC012456.2-201	2
LINC02473-202	2
AC245884.1-201	2
AC034234.1-201	2
AC073342.1-201	2
LINC01833-202	2
HULC-276	2
AC009041.2-206	2
AC073342.1-202	2
AC021087.4-201	2
PART1-203	2
AC009041.2-205	2
AF130417.1-201	2
AL122034.1-201	2
AL050404.1-201	2
LINC02188-206	2
LINC02188-204	2
AL357562.1-201	2
AC105094.1-201	2
CASC8-201	2
PKN2-AS1-206	2
LINC01143-201	2
SERTAD4-AS1-201	2
AL583785.1-204	2
AL161725.1-207	2
PICSAR-201	2
AC034234.1-202	2
AC009970.1-201	2
AC074050.4-201	2
PKN2-AS1-212	2
AC124248.1-201	2
AC090506.1-201	2
SNHG6-202	2
AC015712.4-203	2
LINC02771-202	2
AL359555.4-202	2
AC036176.3-201	2
AC011270.2-201	2
AC015574.1-204	2
AC092969.1-203	2
AC020659.1-201	2
AC053513.1-204	2
AC012354.10-201	2
AC004130.2-202	2
FIRRE-213	3
FIRRE-210	3
FIRRE-202	3
FIRRE-208	3
CHODL-AS1-201	3
C21orf91-OT1-201	3
C21orf91-OT1-203	3
SNHG3-203	3
C21orf91-OT1-202	3
AC006329.1-202	3
FIRRE-211	3
AL592166.1-202	3
FIRRE-214	3
AL606760.1-202	3
AC009630.2-202	3
Z84488.1-201	3
U62317.1-201	3
PSMB8-AS1-207	3
AP000873.3-201	3
DSCR9-203	3
AC099063.1-201	3
LINC02446-201	3
FIRRE-204	3
AL591468.1-201	3
AL391069.2-201	3
SNHG17-211	3
SNHG6-205	3
AC078883.1-204	3
LINC02195-201	3
LINC02367-210	3
PANDAR-201	3
FIRRE-207	3
AC079354.2-201	3
AP000695.3-201	3
NIFK-AS1-207	3
C1RL-AS1-204	3
AL022724.2-201	3
LINC02367-202	3
AL391069.1-201	3
PCBP1-AS1-233	3
AC244453.1-201	3
PSMB8-AS1-204	3
AC097460.1-201	3
AL109761.1-202	3
AC092821.3-203	3
AC012379.2-201	3
AC012236.1-205	3
AC007991.2-201	3
LINC02446-202	3
AC022217.2-201	3
AC004540.2-204	3
AL589765.7-201	3
LINC02532-241	3
AL109761.1-201	3
AC012236.1-202	3
SNHG17-244	3
AC012640.4-201	3
AL713965.1-201	3
FIRRE-215	3
LINC02637-201	3
AL157387.1-201	1
AC079296.2-201	1
AC018680.1-202	1
AL133383.1-203	1
FAM198B-AS1-205	1
AC108861.1-201	1
UBL7-AS1-203	1
AP006565.1-201	1
AC064799.2-201	1
FAM198B-AS1-203	1
AP002518.2-201	1
AC008663.1-201	1
AP002755.1-201	1
MEG8-202	1
AL355994.3-201	1
AL357972.1-201	1
LINC00517-202	1
AP001528.1-201	1
AC064799.2-202	1
KAZN-AS1-206	1
AC105450.1-201	1
KAZN-AS1-203	1
ADIRF-AS1-203	1
AC025917.1-201	1
AC007317.1-201	1
AC098679.6-201	1
THSD4-AS1-208	1
AC008268.1-201	1
AC079296.1-204	1
AC012613.2-201	1
ARHGEF38-IT1-201	1
AC010378.2-201	1
MIR29B2CHG-203	1
AL392023.2-202	1
AL359233.1-201	1
AC139720.2-201	1
AC022196.1-201	1
FGF10-AS1-201	1
AC003991.1-212	1
AC009560.4-201	1
TAT-AS1-202	1
AF181450.1-201	1
ABCA9-AS1-201	1
AL158206.1-201	1
AC025917.1-202	1
AP006248.2-201	1
AL079343.1-201	1
NR2F1-AS1-231	1
THSD4-AS1-202	1
AL158847.1-201	1
FAM198B-AS1-201	1
AC003991.1-211	1
AC003991.1-201	1
THSD4-AS1-204	1
SOCS2-AS1-204	1
PGR-AS1-202	1
AL121790.1-201	1
AC092667.1-201	1
LINC02284-206	1
LINC02224-203	1
