# Supplementary material for: LncRNA-Based Classification of Triple Negative Breast Cancer Revealed Inherent Tumor Heterogeneity and Vulnerabilities
Source: Noncoding RNA. 2022 Jun 21;8(4):44. doi: 10.3390/ncrna8040044 (PMC9326727; doi:10.3390/ncrna8040044)
Supplement: Supplementary file 1 [file ncrna-08-00044-s001.zip › Supplementary table S3.xlsx]

## Sheet: Clustering-MarkerGenes_correlat
Supplenetary table S3. Gene enrichment in the indicated TNBC or normal breast cluster
Cluster	ENSEMBL ID	Gene Symbol
LINC00511-enriched	ENSG00000169696	ASPSCR1
LINC00511-enriched	ENSG00000198700	IPO9
LINC00511-enriched	ENSG00000013810	TACC3
LINC00511-enriched	ENSG00000120334	CENPL
LINC00511-enriched	ENSG00000143228	NUF2
LINC00511-enriched	ENSG00000163872	YEATS2
LINC00511-enriched	ENSG00000198176	TFDP1
LINC00511-enriched	ENSG00000089685	BIRC5
LINC00511-enriched	ENSG00000102384	CENPI
LINC00511-enriched	ENSG00000039560	RAI14
LINC00511-enriched	ENSG00000171877	FRMD5
LINC00511-enriched	ENSG00000119403	PHF19
LINC00511-enriched	ENSG00000161800	RACGAP1
LINC00511-enriched	ENSG00000204764	RANBP17
LINC00511-enriched	ENSG00000110427	KIAA1549L
LINC00511-enriched	ENSG00000176915	ANKLE2
LINC00511-enriched	ENSG00000168496	FEN1
LINC00511-enriched	ENSG00000112984	KIF20A
LINC00511-enriched	ENSG00000233885	YEATS2-AS1
LINC00511-enriched	ENSG00000128595	CALU
LINC00511-enriched	ENSG00000109805	NCAPG
LINC00511-enriched	ENSG00000112118	MCM3
LINC00511-enriched	ENSG00000136603	SKIL
LINC00511-enriched	ENSG00000121621	KIF18A
LINC00511-enriched	ENSG00000224531	SMIM13
LINC00511-enriched	ENSG00000182481	KPNA2
LINC00511-enriched	ENSG00000141577	AZI1
LINC00511-enriched	ENSG00000137404	NRM
LINC00511-enriched	ENSG00000183856	IQGAP3
LINC00511-enriched	ENSG00000137168	PPIL1
LINC00511-enriched	ENSG00000165244	ZNF367
LINC00511-enriched	ENSG00000165138	ANKS6
LINC00511-enriched	ENSG00000113810	SMC4
LINC00511-enriched	ENSG00000198554	WDHD1
LINC00511-enriched	ENSG00000140534	TICRR
LINC00511-enriched	ENSG00000198901	PRC1
LINC00511-enriched	ENSG00000136492	BRIP1
LINC00511-enriched	ENSG00000237649	KIFC1
LINC00511-enriched	ENSG00000123485	HJURP
LINC00511-enriched	ENSG00000113368	LMNB1
LINC00511-enriched	ENSG00000185359	HGS
LINC00511-enriched	ENSG00000164932	CTHRC1
LINC00511-enriched	ENSG00000100297	MCM5
LINC00511-enriched	ENSG00000122641	INHBA
LINC00511-enriched	ENSG00000183684	ALYREF
LINC00511-enriched	ENSG00000198937	CCDC167
LINC00511-enriched	ENSG00000137807	KIF23
LINC00511-enriched	ENSG00000090889	KIF4A
LINC00511-enriched	ENSG00000122966	CIT
LINC00511-enriched	ENSG00000213186	TRIM59
LINC00511-enriched	ENSG00000182446	NPLOC4
LINC00511-enriched	ENSG00000148773	MKI67
LINC00511-enriched	ENSG00000124795	DEK
LINC00511-enriched	ENSG00000197299	BLM
LINC00511-enriched	ENSG00000112242	E2F3
LINC00511-enriched	ENSG00000140525	FANCI
LINC00511-enriched	ENSG00000253966	CTC-455F18.3
LINC00511-enriched	ENSG00000165891	E2F7
LINC00511-enriched	ENSG00000227036	LINC00511
LINC00393-enriched	ENSG00000133627	ACTR3B
LINC00393-enriched	ENSG00000163064	EN1
LINC00393-enriched	ENSG00000140950	TLDC1
LINC00393-enriched	ENSG00000122136	OBP2A
LINC00393-enriched	ENSG00000225472	RP11-120J1.1
LINC00393-enriched	ENSG00000069998	CECR5
LINC00393-enriched	ENSG00000246203	RP11-29H23.5
LINC00393-enriched	ENSG00000233716	AC074367.1
LINC00393-enriched	ENSG00000239322	AC007040.7
LINC00393-enriched	ENSG00000164758	MED30
LINC00393-enriched	ENSG00000250215	CIR1P2
LINC00393-enriched	ENSG00000101425	BPI
LINC00393-enriched	ENSG00000143452	HORMAD1
LINC00393-enriched	ENSG00000005513	SOX8
LINC00393-enriched	ENSG00000145365	TIFA
LINC00393-enriched	ENSG00000137563	GGH
LINC00393-enriched	ENSG00000254607	RP11-115C10.1
LINC00393-enriched	ENSG00000164626	KCNK5
LINC00393-enriched	ENSG00000171102	OBP2B
LINC00393-enriched	ENSG00000213064	SFT2D2
LINC00393-enriched	ENSG00000180739	S1PR5
LINC00393-enriched	ENSG00000165794	SLC39A2
LINC00393-enriched	ENSG00000233388	RP4-569D19.5
LINC00393-enriched	ENSG00000231386	AC007395.4
LINC00393-enriched	ENSG00000166682	TMPRSS5
LINC00393-enriched	ENSG00000158457	TSPAN33
LINC00393-enriched	ENSG00000164695	CHMP4C
LINC00393-enriched	ENSG00000259001	RPPH1
LINC00393-enriched	ENSG00000172382	PRSS27
LINC00393-enriched	ENSG00000119866	BCL11A
LINC00393-enriched	ENSG00000174607	UGT8
LINC00393-enriched	ENSG00000158008	EXTL1
LINC00393-enriched	ENSG00000235605	RP5-827C21.1
LINC00393-enriched	ENSG00000156219	ART3
LINC00393-enriched	ENSG00000184860	SDR42E1
LINC00393-enriched	ENSG00000177788	RP5-1061H20.4
LINC00393-enriched	ENSG00000236502	SIX3-AS1
LINC00393-enriched	ENSG00000179673	RPRML
LINC00393-enriched	ENSG00000203706	SERTAD4-AS1
LINC00393-enriched	ENSG00000116039	ATP6V1B1
LINC00393-enriched	ENSG00000228034	HMGN2P21
LINC00393-enriched	ENSG00000108244	KRT23
LINC00393-enriched	ENSG00000157368	IL34
LINC00393-enriched	ENSG00000226186	TCEB1P21
LINC00393-enriched	ENSG00000133742	CA1
LINC00393-enriched	ENSG00000167757	KLK11
LINC00393-enriched	ENSG00000196196	HRCT1
LINC00393-enriched	ENSG00000082497	SERTAD4
LINC00393-enriched	ENSG00000183780	SLC35F3
LINC00393-enriched	ENSG00000188883	KLRG2
LINC00393-enriched	ENSG00000253349	COX6B1P6
LINC00393-enriched	ENSG00000174514	MFSD4
LINC00393-enriched	ENSG00000162873	KLHDC8A
LINC00393-enriched	ENSG00000102554	KLF5
LINC00393-enriched	ENSG00000007038	PRSS21
LINC00393-enriched	ENSG00000178826	TMEM139
LINC00393-enriched	ENSG00000114547	ROPN1B
LINC00393-enriched	ENSG00000161574	CCL15-CCL14
LINC00393-enriched	ENSG00000102854	MSLN
LINC00393-enriched	ENSG00000229708	MARK2P12
FIRRE-enriched	ENSG00000103121	CMC2
FIRRE-enriched	ENSG00000134690	CDCA8
FIRRE-enriched	ENSG00000184678	HIST2H2BE
FIRRE-enriched	ENSG00000185130	HIST1H2BL
FIRRE-enriched	ENSG00000169627	BOLA2B
FIRRE-enriched	ENSG00000183336	BOLA2
FIRRE-enriched	ENSG00000077152	UBE2T
FIRRE-enriched	ENSG00000151465	CDC123
FIRRE-enriched	ENSG00000126787	DLGAP5
FIRRE-enriched	ENSG00000198374	HIST1H2AL
FIRRE-enriched	ENSG00000163507	KIAA1524
FIRRE-enriched	ENSG00000134057	CCNB1
FIRRE-enriched	ENSG00000182572	HIST1H3I
FIRRE-enriched	ENSG00000146410	MTFR2
FIRRE-enriched	ENSG00000101447	FAM83D
FIRRE-enriched	ENSG00000177602	GSG2
FIRRE-enriched	ENSG00000065328	MCM10
FIRRE-enriched	ENSG00000198826	ARHGAP11A
FIRRE-enriched	ENSG00000125835	SNRPB
FIRRE-enriched	ENSG00000196226	HIST1H2BB
FIRRE-enriched	ENSG00000166451	CENPN
FIRRE-enriched	ENSG00000197153	HIST1H3J
FIRRE-enriched	ENSG00000197459	HIST1H2BH
FIRRE-enriched	ENSG00000117450	PRDX1
FIRRE-enriched	ENSG00000196331	HIST1H2BO
FIRRE-enriched	ENSG00000124575	HIST1H1D
FIRRE-enriched	ENSG00000203812	HIST2H2AA4
FIRRE-enriched	ENSG00000164109	MAD2L1
FIRRE-enriched	ENSG00000175063	UBE2C
FIRRE-enriched	ENSG00000184348	HIST1H2AK
FIRRE-enriched	ENSG00000203814	HIST2H2BF
FIRRE-enriched	ENSG00000215369	RPL37P3
FIRRE-enriched	ENSG00000188987	HIST1H4D
FIRRE-enriched	ENSG00000173207	CKS1B
FIRRE-enriched	ENSG00000188820	FAM26F
FIRRE-enriched	ENSG00000203813	HIST1H3H
FIRRE-enriched	ENSG00000152455	SUV39H2
FIRRE-enriched	ENSG00000240770	C21orf91-OT1
FIRRE-enriched	ENSG00000134028	ADAMDEC1
FIRRE-enriched	ENSG00000109861	CTSC
FIRRE-enriched	ENSG00000051523	CYBA
FIRRE-enriched	ENSG00000123975	CKS2
FIRRE-enriched	ENSG00000137259	HIST1H2AB
FIRRE-enriched	ENSG00000198558	HIST1H4L
FIRRE-enriched	ENSG00000203811	HIST2H3C
FIRRE-enriched	ENSG00000203852	HIST2H3A
FIRRE-enriched	ENSG00000172243	CLEC7A
FIRRE-enriched	ENSG00000184270	HIST2H2AB
FIRRE-enriched	ENSG00000170312	CDK1
FIRRE-enriched	ENSG00000180879	SSR4
FIRRE-enriched	ENSG00000071539	TRIP13
FIRRE-enriched	ENSG00000101084	C20orf24
FIRRE-enriched	ENSG00000232445	RP11-132A1.4
FIRRE-enriched	ENSG00000241418	RP11-512H23.2
FIRRE-enriched	ENSG00000182217	HIST2H4B
FIRRE-enriched	ENSG00000183941	HIST2H4A
FIRRE-enriched	ENSG00000183598	HIST2H3D
FIRRE-enriched	ENSG00000197697	HIST1H2BE
FIRRE-enriched	ENSG00000213468	RP11-453F18__B.1
FIRRE-enriched	ENSG00000168242	HIST1H2BI
NT-like	ENSG00000257542	OR7E47P
NT-like	ENSG00000226054	MEMO1P1
NT-like	ENSG00000140798	ABCC12
NT-like	ENSG00000143845	ETNK2
NT-like	ENSG00000235350	AF196972.3
NT-like	ENSG00000183077	AFMID
NT-like	ENSG00000164120	HPGD
NT-like	ENSG00000256683	ZNF350
NT-like	ENSG00000230052	MTND3P2
NT-like	ENSG00000156564	LRFN2
NT-like	ENSG00000226653	OR13Z1P
NT-like	ENSG00000165548	TMEM63C
NT-like	ENSG00000116171	SCP2
NT-like	ENSG00000183569	SERHL2
NT-like	ENSG00000152503	TRIM36
NT-like	ENSG00000115648	MLPH
NT-like	ENSG00000088002	SULT2B1
NT-like	ENSG00000133328	HRASLS2
NT-like	ENSG00000225497	RP11-180I22.2
NT-like	ENSG00000125508	SRMS
NT-like	ENSG00000257971	ENSG00000257971
NT-like	ENSG00000171236	LRG1
NT-like	ENSG00000169026	MFSD7
NT-like	ENSG00000258560	CTD-2376I20.1
NT-like	ENSG00000227769	AC072062.3
NT-like	ENSG00000154198	CYP4Z2P
NT-like	ENSG00000244162	RP11-206M11.4
NT-like	ENSG00000163762	TM4SF18
NT-like	ENSG00000100031	GGT1
NT-like	ENSG00000239453	SIDT1-AS1
NT-like	ENSG00000137842	TMEM62
NT-like	ENSG00000135698	MPHOSPH6
NT-like	ENSG00000144452	ABCA12
NT-like	ENSG00000236830	CBR3-AS1
NT-like	ENSG00000162949	CAPN13
NT-like	ENSG00000172551	MUCL1
NT-like	ENSG00000117009	KMO
NT-like	ENSG00000156968	MPV17L
NT-like	ENSG00000172602	RND1
NT-like	ENSG00000179057	IGSF22
NT-like	ENSG00000115919	KYNU
NT-like	ENSG00000072858	SIDT1
NT-like	ENSG00000008196	TFAP2B
NT-like	ENSG00000121270	ABCC11
NT-like	ENSG00000115255	REEP6
NT-like	ENSG00000129514	FOXA1
NT-like	ENSG00000151117	TMEM86A
NT-like	ENSG00000230118	AC092569.2
NT-like	ENSG00000170017	ALCAM
NT-like	ENSG00000229453	SPINK8
NT-like	ENSG00000163683	SMIM14
NT-like	ENSG00000244468	RP11-206M11.7
NT-like	ENSG00000255065	RP11-680E19.2
NT-like	ENSG00000169083	AR
NT-like	ENSG00000254811	RP11-680E19.1
NT-like	ENSG00000005469	CROT
NT-like	ENSG00000151715	TMEM45B
NT-like	ENSG00000236699	ARHGEF38
NT-like	ENSG00000182165	TP53TG1
NT-like	ENSG00000248778	RP11-311D14.1
NT	ENSG00000164330	EBF1
NT	ENSG00000197776	KLHDC1
NT	ENSG00000106511	MEOX2
NT	ENSG00000130528	HRC
NT	ENSG00000185585	OLFML2A
NT	ENSG00000224530	PPIAP10
NT	ENSG00000228027	RP1-251M9.3
NT	ENSG00000116678	LEPR
NT	ENSG00000070193	FGF10
NT	ENSG00000185031	RP11-182I10.4
NT	ENSG00000232607	ENSG00000232607
NT	ENSG00000152580	IGSF10
NT	ENSG00000071967	CYBRD1
NT	ENSG00000109686	SH3D19
NT	ENSG00000107562	CXCL12
NT	ENSG00000168874	ATOH8
NT	ENSG00000110318	KIAA1377
NT	ENSG00000078596	ITM2A
NT	ENSG00000008311	AASS
NT	ENSG00000079337	RAPGEF3
NT	ENSG00000129757	CDKN1C
NT	ENSG00000141338	ABCA8
NT	ENSG00000196569	LAMA2
NT	ENSG00000152583	SPARCL1
NT	ENSG00000047648	ARHGAP6
NT	ENSG00000168477	TNXB
NT	ENSG00000148180	GSN
NT	ENSG00000154721	JAM2
NT	ENSG00000234456	MAGI2-AS3
NT	ENSG00000113594	LIFR
NT	ENSG00000165197	FIGF
NT	ENSG00000114698	PLSCR4
NT	ENSG00000124942	AHNAK
NT	ENSG00000020181	GPR124
NT	ENSG00000136158	SPRY2
NT	ENSG00000168497	SDPR
NT	ENSG00000149090	PAMR1
NT	ENSG00000159433	STARD9
NT	ENSG00000169744	LDB2
NT	ENSG00000154263	ABCA10
NT	ENSG00000177363	LRRN4CL
NT	ENSG00000154258	ABCA9
NT	ENSG00000132326	PER2
NT	ENSG00000100626	GALNT16
NT	ENSG00000078549	ADCYAP1R1
NT	ENSG00000146966	DENND2A
NT	ENSG00000137727	ARHGAP20
NT	ENSG00000170962	PDGFD
NT	ENSG00000133116	KL
NT	ENSG00000144642	RBMS3
NT	ENSG00000108924	HLF
NT	ENSG00000241684	ADAMTS9-AS2
NT	ENSG00000147257	GPC3
NT	ENSG00000229240	LINC00710
NT	ENSG00000177098	SCN4B
NT	ENSG00000154262	ABCA6
NT	ENSG00000183722	LHFP
NT	ENSG00000139910	NOVA1
NT	ENSG00000221857	CTD-2527I21.4
NT	ENSG00000149451	ADAM33

## Sheet: Sheet1
LINC00511-enriched	ENSG00000169696	ASPSCR1
LINC00511-enriched	ENSG00000198700	IPO9
LINC00511-enriched	ENSG00000013810	TACC3
LINC00511-enriched	ENSG00000120334	CENPL
LINC00511-enriched	ENSG00000143228	NUF2
LINC00511-enriched	ENSG00000163872	YEATS2
LINC00511-enriched	ENSG00000198176	TFDP1
LINC00511-enriched	ENSG00000089685	BIRC5
LINC00511-enriched	ENSG00000102384	CENPI
LINC00511-enriched	ENSG00000039560	RAI14
LINC00511-enriched	ENSG00000171877	FRMD5
LINC00511-enriched	ENSG00000119403	PHF19
LINC00511-enriched	ENSG00000161800	RACGAP1
LINC00511-enriched	ENSG00000204764	RANBP17
LINC00511-enriched	ENSG00000110427	KIAA1549L
LINC00511-enriched	ENSG00000176915	ANKLE2
LINC00511-enriched	ENSG00000168496	FEN1
LINC00511-enriched	ENSG00000112984	KIF20A
LINC00511-enriched	ENSG00000233885	YEATS2-AS1
LINC00511-enriched	ENSG00000128595	CALU
LINC00511-enriched	ENSG00000109805	NCAPG
LINC00511-enriched	ENSG00000112118	MCM3
LINC00511-enriched	ENSG00000136603	SKIL
LINC00511-enriched	ENSG00000121621	KIF18A
LINC00511-enriched	ENSG00000224531	SMIM13
LINC00511-enriched	ENSG00000182481	KPNA2
LINC00511-enriched	ENSG00000141577	AZI1
LINC00511-enriched	ENSG00000137404	NRM
LINC00511-enriched	ENSG00000183856	IQGAP3
LINC00511-enriched	ENSG00000137168	PPIL1
LINC00511-enriched	ENSG00000165244	ZNF367
LINC00511-enriched	ENSG00000165138	ANKS6
LINC00511-enriched	ENSG00000113810	SMC4
LINC00511-enriched	ENSG00000198554	WDHD1
LINC00511-enriched	ENSG00000140534	TICRR
LINC00511-enriched	ENSG00000198901	PRC1
LINC00511-enriched	ENSG00000136492	BRIP1
LINC00511-enriched	ENSG00000237649	KIFC1
LINC00511-enriched	ENSG00000123485	HJURP
LINC00511-enriched	ENSG00000113368	LMNB1
LINC00511-enriched	ENSG00000185359	HGS
LINC00511-enriched	ENSG00000164932	CTHRC1
LINC00511-enriched	ENSG00000100297	MCM5
LINC00511-enriched	ENSG00000122641	INHBA
LINC00511-enriched	ENSG00000183684	ALYREF
LINC00511-enriched	ENSG00000198937	CCDC167
LINC00511-enriched	ENSG00000137807	KIF23
LINC00511-enriched	ENSG00000090889	KIF4A
LINC00511-enriched	ENSG00000122966	CIT
LINC00511-enriched	ENSG00000213186	TRIM59
LINC00511-enriched	ENSG00000182446	NPLOC4
LINC00511-enriched	ENSG00000148773	MKI67
LINC00511-enriched	ENSG00000124795	DEK
LINC00511-enriched	ENSG00000197299	BLM
LINC00511-enriched	ENSG00000112242	E2F3
LINC00511-enriched	ENSG00000140525	FANCI
LINC00511-enriched	ENSG00000253966	CTC-455F18.3
LINC00511-enriched	ENSG00000165891	E2F7
LINC00511-enriched	ENSG00000227036	LINC00511
LINC00393-enriched	ENSG00000133627	ACTR3B
LINC00393-enriched	ENSG00000163064	EN1
LINC00393-enriched	ENSG00000140950	TLDC1
LINC00393-enriched	ENSG00000122136	OBP2A
LINC00393-enriched	ENSG00000225472	RP11-120J1.1
LINC00393-enriched	ENSG00000069998	CECR5
LINC00393-enriched	ENSG00000246203	RP11-29H23.5
LINC00393-enriched	ENSG00000233716	AC074367.1
LINC00393-enriched	ENSG00000239322	AC007040.7
LINC00393-enriched	ENSG00000164758	MED30
LINC00393-enriched	ENSG00000250215	CIR1P2
LINC00393-enriched	ENSG00000101425	BPI
LINC00393-enriched	ENSG00000143452	HORMAD1
LINC00393-enriched	ENSG00000005513	SOX8
LINC00393-enriched	ENSG00000145365	TIFA
LINC00393-enriched	ENSG00000137563	GGH
LINC00393-enriched	ENSG00000254607	RP11-115C10.1
LINC00393-enriched	ENSG00000164626	KCNK5
LINC00393-enriched	ENSG00000171102	OBP2B
LINC00393-enriched	ENSG00000213064	SFT2D2
LINC00393-enriched	ENSG00000180739	S1PR5
LINC00393-enriched	ENSG00000165794	SLC39A2
LINC00393-enriched	ENSG00000233388	RP4-569D19.5
LINC00393-enriched	ENSG00000231386	AC007395.4
LINC00393-enriched	ENSG00000166682	TMPRSS5
LINC00393-enriched	ENSG00000158457	TSPAN33
LINC00393-enriched	ENSG00000164695	CHMP4C
LINC00393-enriched	ENSG00000259001	RPPH1
LINC00393-enriched	ENSG00000172382	PRSS27
LINC00393-enriched	ENSG00000119866	BCL11A
LINC00393-enriched	ENSG00000174607	UGT8
LINC00393-enriched	ENSG00000158008	EXTL1
LINC00393-enriched	ENSG00000235605	RP5-827C21.1
LINC00393-enriched	ENSG00000156219	ART3
LINC00393-enriched	ENSG00000184860	SDR42E1
LINC00393-enriched	ENSG00000177788	RP5-1061H20.4
LINC00393-enriched	ENSG00000236502	SIX3-AS1
LINC00393-enriched	ENSG00000179673	RPRML
LINC00393-enriched	ENSG00000203706	SERTAD4-AS1
LINC00393-enriched	ENSG00000116039	ATP6V1B1
LINC00393-enriched	ENSG00000228034	HMGN2P21
LINC00393-enriched	ENSG00000108244	KRT23
LINC00393-enriched	ENSG00000157368	IL34
LINC00393-enriched	ENSG00000226186	TCEB1P21
LINC00393-enriched	ENSG00000133742	CA1
LINC00393-enriched	ENSG00000167757	KLK11
LINC00393-enriched	ENSG00000196196	HRCT1
LINC00393-enriched	ENSG00000082497	SERTAD4
LINC00393-enriched	ENSG00000183780	SLC35F3
LINC00393-enriched	ENSG00000188883	KLRG2
LINC00393-enriched	ENSG00000253349	COX6B1P6
LINC00393-enriched	ENSG00000174514	MFSD4
LINC00393-enriched	ENSG00000162873	KLHDC8A
LINC00393-enriched	ENSG00000102554	KLF5
LINC00393-enriched	ENSG00000007038	PRSS21
LINC00393-enriched	ENSG00000178826	TMEM139
LINC00393-enriched	ENSG00000114547	ROPN1B
LINC00393-enriched	ENSG00000161574	CCL15-CCL14
LINC00393-enriched	ENSG00000102854	MSLN
LINC00393-enriched	ENSG00000229708	MARK2P12
FIRRE-enriched	ENSG00000103121	CMC2
FIRRE-enriched	ENSG00000134690	CDCA8
FIRRE-enriched	ENSG00000184678	HIST2H2BE
FIRRE-enriched	ENSG00000185130	HIST1H2BL
FIRRE-enriched	ENSG00000169627	BOLA2B
FIRRE-enriched	ENSG00000183336	BOLA2
FIRRE-enriched	ENSG00000077152	UBE2T
FIRRE-enriched	ENSG00000151465	CDC123
FIRRE-enriched	ENSG00000126787	DLGAP5
FIRRE-enriched	ENSG00000198374	HIST1H2AL
FIRRE-enriched	ENSG00000163507	KIAA1524
FIRRE-enriched	ENSG00000134057	CCNB1
FIRRE-enriched	ENSG00000182572	HIST1H3I
FIRRE-enriched	ENSG00000146410	MTFR2
FIRRE-enriched	ENSG00000101447	FAM83D
FIRRE-enriched	ENSG00000177602	GSG2
FIRRE-enriched	ENSG00000065328	MCM10
FIRRE-enriched	ENSG00000198826	ARHGAP11A
FIRRE-enriched	ENSG00000125835	SNRPB
FIRRE-enriched	ENSG00000196226	HIST1H2BB
FIRRE-enriched	ENSG00000166451	CENPN
FIRRE-enriched	ENSG00000197153	HIST1H3J
FIRRE-enriched	ENSG00000197459	HIST1H2BH
FIRRE-enriched	ENSG00000117450	PRDX1
FIRRE-enriched	ENSG00000196331	HIST1H2BO
FIRRE-enriched	ENSG00000124575	HIST1H1D
FIRRE-enriched	ENSG00000203812	HIST2H2AA4
FIRRE-enriched	ENSG00000164109	MAD2L1
FIRRE-enriched	ENSG00000175063	UBE2C
FIRRE-enriched	ENSG00000184348	HIST1H2AK
FIRRE-enriched	ENSG00000203814	HIST2H2BF
FIRRE-enriched	ENSG00000215369	RPL37P3
FIRRE-enriched	ENSG00000188987	HIST1H4D
FIRRE-enriched	ENSG00000173207	CKS1B
FIRRE-enriched	ENSG00000188820	FAM26F
FIRRE-enriched	ENSG00000203813	HIST1H3H
FIRRE-enriched	ENSG00000152455	SUV39H2
FIRRE-enriched	ENSG00000240770	C21orf91-OT1
FIRRE-enriched	ENSG00000134028	ADAMDEC1
FIRRE-enriched	ENSG00000109861	CTSC
FIRRE-enriched	ENSG00000051523	CYBA
FIRRE-enriched	ENSG00000123975	CKS2
FIRRE-enriched	ENSG00000137259	HIST1H2AB
FIRRE-enriched	ENSG00000198558	HIST1H4L
FIRRE-enriched	ENSG00000203811	HIST2H3C
FIRRE-enriched	ENSG00000203852	HIST2H3A
FIRRE-enriched	ENSG00000172243	CLEC7A
FIRRE-enriched	ENSG00000184270	HIST2H2AB
FIRRE-enriched	ENSG00000170312	CDK1
FIRRE-enriched	ENSG00000180879	SSR4
FIRRE-enriched	ENSG00000071539	TRIP13
FIRRE-enriched	ENSG00000101084	C20orf24
FIRRE-enriched	ENSG00000232445	RP11-132A1.4
FIRRE-enriched	ENSG00000241418	RP11-512H23.2
FIRRE-enriched	ENSG00000182217	HIST2H4B
FIRRE-enriched	ENSG00000183941	HIST2H4A
FIRRE-enriched	ENSG00000183598	HIST2H3D
FIRRE-enriched	ENSG00000197697	HIST1H2BE
FIRRE-enriched	ENSG00000213468	RP11-453F18__B.1
FIRRE-enriched	ENSG00000168242	HIST1H2BI
NT-like	ENSG00000257542	OR7E47P
NT-like	ENSG00000226054	MEMO1P1
NT-like	ENSG00000140798	ABCC12
NT-like	ENSG00000143845	ETNK2
NT-like	ENSG00000235350	AF196972.3
NT-like	ENSG00000183077	AFMID
NT-like	ENSG00000164120	HPGD
NT-like	ENSG00000256683	ZNF350
NT-like	ENSG00000230052	MTND3P2
NT-like	ENSG00000156564	LRFN2
NT-like	ENSG00000226653	OR13Z1P
NT-like	ENSG00000165548	TMEM63C
NT-like	ENSG00000116171	SCP2
NT-like	ENSG00000183569	SERHL2
NT-like	ENSG00000152503	TRIM36
NT-like	ENSG00000115648	MLPH
NT-like	ENSG00000088002	SULT2B1
NT-like	ENSG00000133328	HRASLS2
NT-like	ENSG00000225497	RP11-180I22.2
NT-like	ENSG00000125508	SRMS
NT-like	ENSG00000257971	ENSG00000257971
NT-like	ENSG00000171236	LRG1
NT-like	ENSG00000169026	MFSD7
NT-like	ENSG00000258560	CTD-2376I20.1
NT-like	ENSG00000227769	AC072062.3
NT-like	ENSG00000154198	CYP4Z2P
NT-like	ENSG00000244162	RP11-206M11.4
NT-like	ENSG00000163762	TM4SF18
NT-like	ENSG00000100031	GGT1
NT-like	ENSG00000239453	SIDT1-AS1
NT-like	ENSG00000137842	TMEM62
NT-like	ENSG00000135698	MPHOSPH6
NT-like	ENSG00000144452	ABCA12
NT-like	ENSG00000236830	CBR3-AS1
NT-like	ENSG00000162949	CAPN13
NT-like	ENSG00000172551	MUCL1
NT-like	ENSG00000117009	KMO
NT-like	ENSG00000156968	MPV17L
NT-like	ENSG00000172602	RND1
NT-like	ENSG00000179057	IGSF22
NT-like	ENSG00000115919	KYNU
NT-like	ENSG00000072858	SIDT1
NT-like	ENSG00000008196	TFAP2B
NT-like	ENSG00000121270	ABCC11
NT-like	ENSG00000115255	REEP6
NT-like	ENSG00000129514	FOXA1
NT-like	ENSG00000151117	TMEM86A
NT-like	ENSG00000230118	AC092569.2
NT-like	ENSG00000170017	ALCAM
NT-like	ENSG00000229453	SPINK8
NT-like	ENSG00000163683	SMIM14
NT-like	ENSG00000244468	RP11-206M11.7
NT-like	ENSG00000255065	RP11-680E19.2
NT-like	ENSG00000169083	AR
NT-like	ENSG00000254811	RP11-680E19.1
NT-like	ENSG00000005469	CROT
NT-like	ENSG00000151715	TMEM45B
NT-like	ENSG00000236699	ARHGEF38
NT-like	ENSG00000182165	TP53TG1
NT-like	ENSG00000248778	RP11-311D14.1
NT	ENSG00000164330	EBF1
NT	ENSG00000197776	KLHDC1
NT	ENSG00000106511	MEOX2
NT	ENSG00000130528	HRC
NT	ENSG00000185585	OLFML2A
NT	ENSG00000224530	PPIAP10
NT	ENSG00000228027	RP1-251M9.3
NT	ENSG00000116678	LEPR
NT	ENSG00000070193	FGF10
NT	ENSG00000185031	RP11-182I10.4
NT	ENSG00000232607	ENSG00000232607
NT	ENSG00000152580	IGSF10
NT	ENSG00000071967	CYBRD1
NT	ENSG00000109686	SH3D19
NT	ENSG00000107562	CXCL12
NT	ENSG00000168874	ATOH8
NT	ENSG00000110318	KIAA1377
NT	ENSG00000078596	ITM2A
NT	ENSG00000008311	AASS
NT	ENSG00000079337	RAPGEF3
NT	ENSG00000129757	CDKN1C
NT	ENSG00000141338	ABCA8
NT	ENSG00000196569	LAMA2
NT	ENSG00000152583	SPARCL1
NT	ENSG00000047648	ARHGAP6
NT	ENSG00000168477	TNXB
NT	ENSG00000148180	GSN
NT	ENSG00000154721	JAM2
NT	ENSG00000234456	MAGI2-AS3
NT	ENSG00000113594	LIFR
NT	ENSG00000165197	FIGF
NT	ENSG00000114698	PLSCR4
NT	ENSG00000124942	AHNAK
NT	ENSG00000020181	GPR124
NT	ENSG00000136158	SPRY2
NT	ENSG00000168497	SDPR
NT	ENSG00000149090	PAMR1
NT	ENSG00000159433	STARD9
NT	ENSG00000169744	LDB2
NT	ENSG00000154263	ABCA10
NT	ENSG00000177363	LRRN4CL
NT	ENSG00000154258	ABCA9
NT	ENSG00000132326	PER2
NT	ENSG00000100626	GALNT16
NT	ENSG00000078549	ADCYAP1R1
NT	ENSG00000146966	DENND2A
NT	ENSG00000137727	ARHGAP20
NT	ENSG00000170962	PDGFD
NT	ENSG00000133116	KL
NT	ENSG00000144642	RBMS3
NT	ENSG00000108924	HLF
NT	ENSG00000241684	ADAMTS9-AS2
NT	ENSG00000147257	GPC3
NT	ENSG00000229240	LINC00710
NT	ENSG00000177098	SCN4B
NT	ENSG00000154262	ABCA6
NT	ENSG00000183722	LHFP
NT	ENSG00000139910	NOVA1
NT	ENSG00000221857	CTD-2527I21.4
NT	ENSG00000149451	ADAM33
