# Supplementary material for: LncRNA-Based Classification of Triple Negative Breast Cancer Revealed Inherent Tumor Heterogeneity and Vulnerabilities
Source: Noncoding RNA. 2022 Jun 21;8(4):44. doi: 10.3390/ncrna8040044 (PMC9326727; doi:10.3390/ncrna8040044)
Supplement: Supplementary file 1 [file ncrna-08-00044-s001.zip › Supplementary table S4.xlsx]

## Sheet: enrichment.Process (2)
Supplemetary table S4. Enriched gene ontology (GO) terms in FIRRE-Enr TNBC cluster based on STRING analysis
#term ID	term description	observed gene count	background gene count	strength	false discovery rate	matching proteins in your network (IDs)	matching proteins in your network (labels)
GO:0000278	Mitotic cell cycle	102	695	0.83	3.03e-46	9606.ENSP00000166345,9606.ENSP00000209728,9606.ENSP00000216911,9606.ENSP00000217026,9606.ENSP00000219097,9606.ENSP00000240423,9606.ENSP00000242208,9606.ENSP00000247191,9606.ENSP00000251496,9606.ENSP00000256442,9606.ENSP00000257934,9606.ENSP00000260363,9606.ENSP00000260731,9606.ENSP00000261597,9606.ENSP00000262105,9606.ENSP00000262300,9606.ENSP00000262643,9606.ENSP00000263181,9606.ENSP00000263753,…	TRIP13,CDC6,AURKA,MYBL2,ORC6,NCAPH,INHBA,DLGAP5,NCAPG,CCNB1,ESPL1,KIF23,KIF11,NDC80,MCM4,PKMYT1,CCNE1,KIF18A,SGOL1,UBE2S,MCM2,CENPE,DBF4,ANLN,PLK4,NUF2,CCNA2,CDCA5,BUB1B,CCNB2,POC1A,MAD2L1,MELK,PLK1,TPX2,TUBA1C,BIRC5,BUB1,CDC25A,CKS1B,CLSPN,AURKB,SKA3,CDC25C,E2F7,SPAG5,KIF15,NCAPD2,TACC3,CDKN3,CENPA,EIF4EBP1,FOXM1,E2F1,BLM,UBE2C,SMC4,RRM2,WDHD1,IQGAP3,CENPF,NEK2,KIF14,CENPW,TTK,PSRC1,CEP55,ORC1,S…
GO:0007049	Cell cycle	130	1313	0.65	1.09e-43	9606.ENSP00000166345,9606.ENSP00000209728,9606.ENSP00000216911,9606.ENSP00000217026,9606.ENSP00000219097,9606.ENSP00000240423,9606.ENSP00000240488,9606.ENSP00000242208,9606.ENSP00000247191,9606.ENSP00000251496,9606.ENSP00000256442,9606.ENSP00000257934,9606.ENSP00000260363,9606.ENSP00000260731,9606.ENSP00000261597,9606.ENSP00000262105,9606.ENSP00000262300,9606.ENSP00000262643,9606.ENSP00000263181,…	TRIP13,CDC6,AURKA,MYBL2,ORC6,NCAPH,MND1,INHBA,DLGAP5,NCAPG,CCNB1,ESPL1,KIF23,KIF11,NDC80,MCM4,PKMYT1,CCNE1,KIF18A,SGOL1,UBE2S,MCM2,CENPE,DBF4,ANLN,PLK4,NUF2,CCNA2,CDCA5,BUB1B,CCNB2,POC1A,MAD2L1,MELK,KIAA0101,PLK1,TPX2,TUBA1C,BIRC5,BUB1,CDC25A,FEN1,CXCL8,FANCI,CKS1B,CLSPN,AURKB,SKA3,EZH2,CDC25C,E2F7,SPAG5,KIF15,NCAPD2,TACC3,CDCA2,LIN9,CDKN3,CASC5,CENPA,EIF4EBP1,FOXM1,E2F1,SUV39H2,BLM,UBE2C,SMC4,RR…
GO:1903047	Mitotic cell cycle process	94	616	0.84	1.09e-43	9606.ENSP00000166345,9606.ENSP00000209728,9606.ENSP00000216911,9606.ENSP00000217026,9606.ENSP00000219097,9606.ENSP00000240423,9606.ENSP00000242208,9606.ENSP00000247191,9606.ENSP00000251496,9606.ENSP00000256442,9606.ENSP00000257934,9606.ENSP00000260363,9606.ENSP00000260731,9606.ENSP00000261597,9606.ENSP00000262105,9606.ENSP00000262300,9606.ENSP00000262643,9606.ENSP00000263181,9606.ENSP00000263753,…	TRIP13,CDC6,AURKA,MYBL2,ORC6,NCAPH,INHBA,DLGAP5,NCAPG,CCNB1,ESPL1,KIF23,KIF11,NDC80,MCM4,PKMYT1,CCNE1,KIF18A,SGOL1,UBE2S,MCM2,CENPE,DBF4,ANLN,PLK4,NUF2,CCNA2,CDCA5,BUB1B,CCNB2,POC1A,MAD2L1,MELK,PLK1,TPX2,BIRC5,BUB1,CDC25A,CKS1B,CLSPN,AURKB,CDC25C,E2F7,SPAG5,NCAPD2,TACC3,CDKN3,CENPA,EIF4EBP1,FOXM1,E2F1,BLM,UBE2C,SMC4,RRM2,IQGAP3,CENPF,NEK2,KIF14,TTK,PSRC1,CEP55,ORC1,STIL,KIF2C,CDC20,CDCA8,RCC1,ZWI…
GO:0022402	Cell cycle process	112	976	0.72	2.02e-42	9606.ENSP00000166345,9606.ENSP00000209728,9606.ENSP00000216911,9606.ENSP00000217026,9606.ENSP00000219097,9606.ENSP00000240423,9606.ENSP00000240488,9606.ENSP00000242208,9606.ENSP00000247191,9606.ENSP00000251496,9606.ENSP00000256442,9606.ENSP00000257934,9606.ENSP00000260363,9606.ENSP00000260731,9606.ENSP00000261597,9606.ENSP00000262105,9606.ENSP00000262300,9606.ENSP00000262643,9606.ENSP00000263181,…	TRIP13,CDC6,AURKA,MYBL2,ORC6,NCAPH,MND1,INHBA,DLGAP5,NCAPG,CCNB1,ESPL1,KIF23,KIF11,NDC80,MCM4,PKMYT1,CCNE1,KIF18A,SGOL1,UBE2S,MCM2,CENPE,DBF4,ANLN,PLK4,NUF2,CCNA2,CDCA5,BUB1B,CCNB2,POC1A,MAD2L1,MELK,KIAA0101,PLK1,TPX2,BIRC5,BUB1,CDC25A,FEN1,CXCL8,CKS1B,CLSPN,AURKB,EZH2,CDC25C,E2F7,SPAG5,NCAPD2,TACC3,CDKN3,CASC5,CENPA,EIF4EBP1,FOXM1,E2F1,BLM,UBE2C,SMC4,RRM2,IQGAP3,HORMAD1,CENPF,NEK2,KIF14,ASPM,LAM…
GO:0051301	Cell division	74	493	0.84	2.95e-33	9606.ENSP00000209728,9606.ENSP00000216911,9606.ENSP00000240423,9606.ENSP00000251496,9606.ENSP00000256442,9606.ENSP00000257934,9606.ENSP00000260363,9606.ENSP00000260731,9606.ENSP00000261597,9606.ENSP00000262643,9606.ENSP00000263753,9606.ENSP00000264552,9606.ENSP00000265148,9606.ENSP00000265748,9606.ENSP00000271452,9606.ENSP00000274026,9606.ENSP00000275517,9606.ENSP00000287598,9606.ENSP00000288207,…	CDC6,AURKA,NCAPH,NCAPG,CCNB1,ESPL1,KIF23,KIF11,NDC80,CCNE1,SGOL1,UBE2S,CENPE,ANLN,NUF2,CCNA2,CDCA5,BUB1B,CCNB2,MAD2L1,PLK1,TPX2,TUBA1C,BIRC5,BUB1,CDC25A,CKS1B,AURKB,SKA3,CDC25C,SPAG5,NCAPD2,TACC3,CDCA2,CASC5,CENPA,UBE2C,SMC4,CENPF,NEK2,KIF14,ASPM,CENPW,PSRC1,CEP55,KIF2C,CDC20,CDCA8,RCC1,ZWINT,KIF4A,CKS2,CKAP2,CIT,PTTG1,HELLS,PRC1,INCENP,KIF20A,CDK1,SAPCD2,CDC7,KIFC1,RACGAP1,STMN1,TOP2A,CDKN2A,CCN…
GO:0051276	Chromosome organization	103	1066	0.64	1.34e-32	9606.ENSP00000166345,9606.ENSP00000216911,9606.ENSP00000240423,9606.ENSP00000244534,9606.ENSP00000244573,9606.ENSP00000247191,9606.ENSP00000251496,9606.ENSP00000256442,9606.ENSP00000257934,9606.ENSP00000260363,9606.ENSP00000261597,9606.ENSP00000262105,9606.ENSP00000262643,9606.ENSP00000263181,9606.ENSP00000263382,9606.ENSP00000263753,9606.ENSP00000264233,9606.ENSP00000265056,9606.ENSP00000265148,…	TRIP13,AURKA,NCAPH,HIST1H1D,HIST1H1A,DLGAP5,NCAPG,CCNB1,ESPL1,KIF23,NDC80,MCM4,CCNE1,KIF18A,ASF1B,SGOL1,POLQ,MCM2,CENPE,NUF2,CCNA2,CDCA5,CENPU,ATAD2,BUB1B,HIST1H2BD,H2AFZ,HMGB2,MAD2L1,PLK1,BUB1,FEN1,HIST1H1E,CBX2,AURKB,EZH2,HIST1H2BC,SPAG5,NCAPD2,PIF1,HIST1H1B,HIST2H2AB,HIST2H3D,CASC5,CENPA,HIST1H2AD,SUV39H2,HIST1H4J,BLM,HIST1H2BK,SMC4,HIST1H2AI,HIST1H2AG,HIST1H3J,HORMAD1,EXO1,HIST3H2A,CENPF,NEK2…
GO:0000280	Nuclear division	57	291	0.95	2.5e-30	9606.ENSP00000166345,9606.ENSP00000216911,9606.ENSP00000217026,9606.ENSP00000240423,9606.ENSP00000240488,9606.ENSP00000247191,9606.ENSP00000251496,9606.ENSP00000256442,9606.ENSP00000257934,9606.ENSP00000260363,9606.ENSP00000260731,9606.ENSP00000261597,9606.ENSP00000262643,9606.ENSP00000263181,9606.ENSP00000263753,9606.ENSP00000264552,9606.ENSP00000265148,9606.ENSP00000271452,9606.ENSP00000275517,…	TRIP13,AURKA,MYBL2,NCAPH,MND1,DLGAP5,NCAPG,CCNB1,ESPL1,KIF23,KIF11,NDC80,CCNE1,KIF18A,SGOL1,UBE2S,CENPE,NUF2,CDCA5,BUB1B,CCNB2,MAD2L1,PLK1,TPX2,BIRC5,BUB1,AURKB,SPAG5,NCAPD2,UBE2C,SMC4,HORMAD1,NEK2,KIF14,ASPM,TTK,PSRC1,RAD54L,KIF2C,CDC20,CDCA8,ZWINT,KIF4A,CKS2,RAD51,FANCA,PTTG1,PRC1,INCENP,CDK1,KIFC1,RACGAP1,TOP2A,CCNE2,MYBL1,NUSAP1,KIF18B
GO:0048285	Organelle fission	59	318	0.93	2.5e-30	9606.ENSP00000166345,9606.ENSP00000216911,9606.ENSP00000217026,9606.ENSP00000240423,9606.ENSP00000240488,9606.ENSP00000247191,9606.ENSP00000251496,9606.ENSP00000256442,9606.ENSP00000257934,9606.ENSP00000260363,9606.ENSP00000260731,9606.ENSP00000261597,9606.ENSP00000262643,9606.ENSP00000263181,9606.ENSP00000263753,9606.ENSP00000264552,9606.ENSP00000265148,9606.ENSP00000266263,9606.ENSP00000271452,…	TRIP13,AURKA,MYBL2,NCAPH,MND1,DLGAP5,NCAPG,CCNB1,ESPL1,KIF23,KIF11,NDC80,CCNE1,KIF18A,SGOL1,UBE2S,CENPE,MTFP1,NUF2,CDCA5,BUB1B,CCNB2,MAD2L1,PLK1,TPX2,BIRC5,BUB1,AURKB,SPAG5,NCAPD2,UBE2C,SMC4,HORMAD1,NEK2,KIF14,ASPM,TTK,PSRC1,RAD54L,KIF2C,CDC20,CDCA8,ZWINT,KIF4A,CKS2,RAD51,FANCA,PTTG1,PRC1,INCENP,CDK1,KIFC1,MTFR2,RACGAP1,TOP2A,CCNE2,MYBL1,NUSAP1,KIF18B
GO:0007059	Chromosome segregation	54	268	0.96	3.49e-29	9606.ENSP00000166345,9606.ENSP00000240423,9606.ENSP00000247191,9606.ENSP00000251496,9606.ENSP00000256442,9606.ENSP00000257934,9606.ENSP00000260363,9606.ENSP00000261597,9606.ENSP00000262643,9606.ENSP00000263181,9606.ENSP00000263753,9606.ENSP00000265148,9606.ENSP00000271452,9606.ENSP00000275517,9606.ENSP00000287598,9606.ENSP00000296509,9606.ENSP00000300093,9606.ENSP00000301633,9606.ENSP00000302530,…	TRIP13,NCAPH,DLGAP5,NCAPG,CCNB1,ESPL1,KIF23,NDC80,CCNE1,KIF18A,SGOL1,CENPE,NUF2,CDCA5,BUB1B,MAD2L1,PLK1,BIRC5,BUB1,AURKB,SKA3,SPAG5,NCAPD2,CDCA2,CASC5,SMC4,HORMAD1,CENPF,NEK2,KIF14,CENPW,TTK,PSRC1,SLC25A5,KIF2C,CDC20,CDCA8,SRPK1,RCC1,ZWINT,KIF4A,CENPN,PTTG1,PRC1,INCENP,KIFC1,RACGAP1,TOP2A,HJURP,CCNE2,DDX11,NUSAP1,KIF18B,FAM83D
GO:0140014	Mitotic nuclear division	41	156	1.08	1.98e-25	9606.ENSP00000216911,9606.ENSP00000217026,9606.ENSP00000240423,9606.ENSP00000247191,9606.ENSP00000251496,9606.ENSP00000256442,9606.ENSP00000257934,9606.ENSP00000260363,9606.ENSP00000260731,9606.ENSP00000261597,9606.ENSP00000263181,9606.ENSP00000263753,9606.ENSP00000264552,9606.ENSP00000265148,9606.ENSP00000271452,9606.ENSP00000275517,9606.ENSP00000288207,9606.ENSP00000296509,9606.ENSP00000300093,…	AURKA,MYBL2,NCAPH,DLGAP5,NCAPG,CCNB1,ESPL1,KIF23,KIF11,NDC80,KIF18A,SGOL1,UBE2S,CENPE,NUF2,CDCA5,CCNB2,MAD2L1,PLK1,TPX2,BIRC5,AURKB,SPAG5,NCAPD2,UBE2C,SMC4,NEK2,KIF14,PSRC1,KIF2C,CDC20,CDCA8,ZWINT,KIF4A,PRC1,INCENP,CDK1,KIFC1,RACGAP1,NUSAP1,KIF18B
GO:0071103	DNA conformation change	54	328	0.88	2.04e-25	9606.ENSP00000240423,9606.ENSP00000244534,9606.ENSP00000244573,9606.ENSP00000251496,9606.ENSP00000256442,9606.ENSP00000262105,9606.ENSP00000263382,9606.ENSP00000264233,9606.ENSP00000265056,9606.ENSP00000275517,9606.ENSP00000281453,9606.ENSP00000289316,9606.ENSP00000296503,9606.ENSP00000307705,9606.ENSP00000321744,9606.ENSP00000325017,9606.ENSP00000328174,9606.ENSP00000330074,9606.ENSP00000333277,…	NCAPH,HIST1H1D,HIST1H1A,NCAPG,CCNB1,MCM4,ASF1B,POLQ,MCM2,CDCA5,CENPU,HIST1H2BD,HMGB2,HIST1H1E,HIST1H2BC,NCAPD2,PIF1,HIST1H1B,HIST2H3D,CASC5,CENPA,HIST1H4J,BLM,HIST1H2BK,SMC4,HIST1H3J,CENPW,HIST2H2BE,HIST2H3C,HMGB3,RAD54L,SRPK1,HIST1H2BL,HIST1H4H,HIST1H3D,HIST1H4C,RAD51,CENPN,HELLS,INCENP,CDK1,HIST2H3A,HMGA1,TOP2A,HJURP,CDKN2A,H2AFX,DDX11,HIST2H2BF,NUSAP1,HIST1H2BJ,HIST3H2BB,RECQL4,HIST1H2BN
GO:0098813	Nuclear chromosome segregation	45	209	0.99	4.7e-25	9606.ENSP00000166345,9606.ENSP00000240423,9606.ENSP00000247191,9606.ENSP00000251496,9606.ENSP00000256442,9606.ENSP00000257934,9606.ENSP00000260363,9606.ENSP00000261597,9606.ENSP00000262643,9606.ENSP00000263181,9606.ENSP00000263753,9606.ENSP00000265148,9606.ENSP00000271452,9606.ENSP00000275517,9606.ENSP00000287598,9606.ENSP00000296509,9606.ENSP00000300093,9606.ENSP00000302530,9606.ENSP00000313950,…	TRIP13,NCAPH,DLGAP5,NCAPG,CCNB1,ESPL1,KIF23,NDC80,CCNE1,KIF18A,SGOL1,CENPE,NUF2,CDCA5,BUB1B,MAD2L1,PLK1,BUB1,AURKB,SPAG5,NCAPD2,CASC5,SMC4,HORMAD1,CENPF,NEK2,KIF14,TTK,PSRC1,KIF2C,CDC20,CDCA8,ZWINT,KIF4A,PTTG1,PRC1,INCENP,KIFC1,RACGAP1,TOP2A,CCNE2,DDX11,NUSAP1,KIF18B,FAM83D
GO:0006323	DNA packaging	45	215	0.98	1.22e-24	9606.ENSP00000240423,9606.ENSP00000244534,9606.ENSP00000244573,9606.ENSP00000251496,9606.ENSP00000256442,9606.ENSP00000263382,9606.ENSP00000265056,9606.ENSP00000275517,9606.ENSP00000281453,9606.ENSP00000289316,9606.ENSP00000296503,9606.ENSP00000307705,9606.ENSP00000321744,9606.ENSP00000325017,9606.ENSP00000330074,9606.ENSP00000333277,9606.ENSP00000335463,9606.ENSP00000336868,9606.ENSP00000347168,…	NCAPH,HIST1H1D,HIST1H1A,NCAPG,CCNB1,ASF1B,MCM2,CDCA5,CENPU,HIST1H2BD,HMGB2,HIST1H1E,HIST1H2BC,NCAPD2,HIST1H1B,HIST2H3D,CASC5,CENPA,HIST1H4J,HIST1H2BK,SMC4,HIST1H3J,CENPW,HIST2H2BE,HIST2H3C,SRPK1,HIST1H2BL,HIST1H4H,HIST1H3D,HIST1H4C,CENPN,HELLS,INCENP,CDK1,HIST2H3A,HMGA1,TOP2A,HJURP,CDKN2A,H2AFX,HIST2H2BF,NUSAP1,HIST1H2BJ,HIST3H2BB,HIST1H2BN
GO:0000819	Sister chromatid segregation	37	133	1.1	1.31e-23	9606.ENSP00000240423,9606.ENSP00000247191,9606.ENSP00000251496,9606.ENSP00000256442,9606.ENSP00000257934,9606.ENSP00000260363,9606.ENSP00000261597,9606.ENSP00000263181,9606.ENSP00000263753,9606.ENSP00000265148,9606.ENSP00000271452,9606.ENSP00000275517,9606.ENSP00000287598,9606.ENSP00000296509,9606.ENSP00000300093,9606.ENSP00000302530,9606.ENSP00000313950,9606.ENSP00000323300,9606.ENSP00000325017,…	NCAPH,DLGAP5,NCAPG,CCNB1,ESPL1,KIF23,NDC80,KIF18A,SGOL1,CENPE,NUF2,CDCA5,BUB1B,MAD2L1,PLK1,BUB1,AURKB,SPAG5,NCAPD2,SMC4,HORMAD1,NEK2,KIF14,PSRC1,KIF2C,CDC20,CDCA8,ZWINT,KIF4A,PRC1,INCENP,KIFC1,RACGAP1,TOP2A,DDX11,NUSAP1,KIF18B
GO:0051726	Regulation of cell cycle	95	1230	0.55	4.39e-23	9606.ENSP00000166345,9606.ENSP00000209728,9606.ENSP00000216802,9606.ENSP00000216911,9606.ENSP00000217026,9606.ENSP00000242208,9606.ENSP00000247191,9606.ENSP00000256442,9606.ENSP00000257934,9606.ENSP00000260363,9606.ENSP00000260731,9606.ENSP00000261597,9606.ENSP00000261600,9606.ENSP00000262300,9606.ENSP00000262643,9606.ENSP00000265148,9606.ENSP00000265728,9606.ENSP00000265748,9606.ENSP00000270861,…	TRIP13,CDC6,PSME2,AURKA,MYBL2,INHBA,DLGAP5,CCNB1,ESPL1,KIF23,KIF11,NDC80,THOC1,PKMYT1,CCNE1,CENPE,DBF4,ANLN,PLK4,CCNA2,CDCA5,BUB1B,CCNB2,POC1A,MAD2L1,KIAA0101,PLK1,TPX2,BIRC5,BUB1,CDC25A,FEN1,CXCL8,CKS1B,CLSPN,AURKB,GEN1,EZH2,CALR,CDC25C,SOX11,E2F7,SPAG5,TACC3,LIN9,CDKN3,EIF4EBP1,FOXM1,E2F1,BLM,UBE2C,RRM2,HORMAD1,E2F2,CENPF,DTL,NEK2,KIF14,ASPM,LAMTOR2,MKI67,TTK,PSRC1,ORC1,STIL,CDC20,RCC1,ZWINT,PS…
GO:0002376	Immune system process	136	2481	0.4	4.13e-21	9606.ENSP00000216117,9606.ENSP00000216341,9606.ENSP00000216802,9606.ENSP00000219150,9606.ENSP00000226279,9606.ENSP00000229239,9606.ENSP00000236147,9606.ENSP00000236671,9606.ENSP00000242208,9606.ENSP00000250092,9606.ENSP00000250160,9606.ENSP00000256412,9606.ENSP00000257570,9606.ENSP00000259396,9606.ENSP00000260118,9606.ENSP00000260363,9606.ENSP00000260731,9606.ENSP00000261267,9606.ENSP00000261622,…	HMOX1,GZMB,PSME2,CORO1A,CD38,GAPDH,SELL,CTSD,INHBA,CD68,WISP1,ADAMDEC1,OASL,ORM1,GGH,KIF23,KIF11,LYZ,SLC7A5,CYBA,COTL1,TYROBP,PRDX1,KIF18A,EPCAM,POLQ,CD80,ICAM1,CENPE,ANLN,CD53,S100A11,GZMA,CXCL13,CCNB2,SLAMF8,FCER1G,CSTB,CCR5,S100P,HMGB2,MELK,CD3D,LY6D,KRT16,CLEC7A,CTLA4,CXCL10,CXCL8,ISG20,CXCL11,PPP1R14B,TRIM59,C1QB,MARCO,ICOS,CALR,HIST1H2BC,MMP1,KIF15,PMAIP1,APOBEC3B,CD86,SHMT2,PLAUR,FPR3,OAS2…
GO:0000070	Mitotic sister chromatid segregation	32	108	1.13	6.16e-21	9606.ENSP00000240423,9606.ENSP00000247191,9606.ENSP00000251496,9606.ENSP00000256442,9606.ENSP00000257934,9606.ENSP00000260363,9606.ENSP00000261597,9606.ENSP00000263181,9606.ENSP00000263753,9606.ENSP00000265148,9606.ENSP00000271452,9606.ENSP00000275517,9606.ENSP00000296509,9606.ENSP00000300093,9606.ENSP00000313950,9606.ENSP00000323300,9606.ENSP00000325017,9606.ENSP00000349961,9606.ENSP00000355966,…	NCAPH,DLGAP5,NCAPG,CCNB1,ESPL1,KIF23,NDC80,KIF18A,SGOL1,CENPE,NUF2,CDCA5,MAD2L1,PLK1,AURKB,SPAG5,NCAPD2,SMC4,NEK2,KIF14,PSRC1,KIF2C,CDC20,CDCA8,ZWINT,KIF4A,PRC1,INCENP,KIFC1,RACGAP1,NUSAP1,KIF18B
GO:0016043	Cellular component organization	219	5447	0.26	1.09e-20	9606.ENSP00000166345,9606.ENSP00000215743,9606.ENSP00000216341,9606.ENSP00000216911,9606.ENSP00000217026,9606.ENSP00000219150,9606.ENSP00000225655,9606.ENSP00000229238,9606.ENSP00000229239,9606.ENSP00000233143,9606.ENSP00000240423,9606.ENSP00000240488,9606.ENSP00000244534,9606.ENSP00000244573,9606.ENSP00000247191,9606.ENSP00000251496,9606.ENSP00000256442,9606.ENSP00000257934,9606.ENSP00000260102,…	TRIP13,MMP11,GZMB,AURKA,MYBL2,CORO1A,PFN1,MRPL51,GAPDH,TMSB10,NCAPH,MND1,HIST1H1D,HIST1H1A,DLGAP5,NCAPG,CCNB1,ESPL1,MRPL15,KIF23,KIF11,NDC80,CYBA,MCM4,COTL1,TYROBP,CCNE1,KIF18A,ASF1B,SGOL1,CAPG,POLQ,UBE2S,ICAM1,MCM2,CENPE,ANLN,SQLE,MTFP1,PLK4,NUF2,SNRPG,CCNA2,PLA2G7,GGCT,CDCA5,CENPU,UCHL1,ATAD2,BUB1B,CCNB2,HIST1H2BD,SLAMF8,FCER1G,CCR5,H2AFZ,POC1A,HMGB2,MAD2L1,KIAA0101,PLK1,TPX2,CD3D,TUBA1C,BIRC5,…
GO:0006996	Organelle organization	164	3450	0.34	2.16e-20	9606.ENSP00000166345,9606.ENSP00000216341,9606.ENSP00000216911,9606.ENSP00000217026,9606.ENSP00000219150,9606.ENSP00000225655,9606.ENSP00000229239,9606.ENSP00000233143,9606.ENSP00000240423,9606.ENSP00000240488,9606.ENSP00000244534,9606.ENSP00000244573,9606.ENSP00000247191,9606.ENSP00000251496,9606.ENSP00000256442,9606.ENSP00000257934,9606.ENSP00000260363,9606.ENSP00000260731,9606.ENSP00000261597,…	TRIP13,GZMB,AURKA,MYBL2,CORO1A,PFN1,GAPDH,TMSB10,NCAPH,MND1,HIST1H1D,HIST1H1A,DLGAP5,NCAPG,CCNB1,ESPL1,KIF23,KIF11,NDC80,MCM4,TYROBP,CCNE1,KIF18A,ASF1B,SGOL1,CAPG,POLQ,UBE2S,MCM2,CENPE,ANLN,SQLE,MTFP1,PLK4,NUF2,CCNA2,GGCT,CDCA5,CENPU,ATAD2,BUB1B,CCNB2,HIST1H2BD,SLAMF8,H2AFZ,POC1A,HMGB2,MAD2L1,KIAA0101,PLK1,TPX2,TUBA1C,BIRC5,KRT16,BUB1,FEN1,HIST1H1E,CBX2,AURKB,EZH2,CALR,HIST1H2BC,SPAG5,NCAPD2,PMAI…
GO:0010564	Regulation of cell cycle process	70	760	0.62	3.54e-20	9606.ENSP00000166345,9606.ENSP00000209728,9606.ENSP00000216802,9606.ENSP00000216911,9606.ENSP00000247191,9606.ENSP00000256442,9606.ENSP00000257934,9606.ENSP00000260363,9606.ENSP00000260731,9606.ENSP00000261597,9606.ENSP00000262300,9606.ENSP00000265148,9606.ENSP00000265728,9606.ENSP00000265748,9606.ENSP00000270861,9606.ENSP00000275517,9606.ENSP00000287598,9606.ENSP00000296484,9606.ENSP00000296509,…	TRIP13,CDC6,PSME2,AURKA,DLGAP5,CCNB1,ESPL1,KIF23,KIF11,NDC80,PKMYT1,CENPE,DBF4,ANLN,PLK4,CDCA5,BUB1B,POC1A,MAD2L1,PLK1,TPX2,BIRC5,BUB1,CDC25A,FEN1,CLSPN,AURKB,GEN1,EZH2,CALR,CDC25C,E2F7,SPAG5,TACC3,FOXM1,E2F1,BLM,UBE2C,RRM2,HORMAD1,CENPF,DTL,NEK2,KIF14,MKI67,TTK,PSRC1,ORC1,STIL,CDC20,RCC1,PSMB9,UBD,PCNA,RAD51,CIT,HMMR,PTTG1,PRC1,INCENP,KIF20A,CDK1,CDC7,RACGAP1,CDC45,CDKN2A,DDX11,NUSAP1,E2F8,FAM83D
GO:0071840	Cellular component organization or biogenesis	220	5633	0.25	3.21e-19	9606.ENSP00000166345,9606.ENSP00000215743,9606.ENSP00000216341,9606.ENSP00000216911,9606.ENSP00000217026,9606.ENSP00000219150,9606.ENSP00000225655,9606.ENSP00000229238,9606.ENSP00000229239,9606.ENSP00000233143,9606.ENSP00000240423,9606.ENSP00000240488,9606.ENSP00000244534,9606.ENSP00000244573,9606.ENSP00000247191,9606.ENSP00000251496,9606.ENSP00000256442,9606.ENSP00000257934,9606.ENSP00000260102,…	TRIP13,MMP11,GZMB,AURKA,MYBL2,CORO1A,PFN1,MRPL51,GAPDH,TMSB10,NCAPH,MND1,HIST1H1D,HIST1H1A,DLGAP5,NCAPG,CCNB1,ESPL1,MRPL15,KIF23,KIF11,NDC80,CYBA,MCM4,COTL1,TYROBP,CCNE1,KIF18A,ASF1B,SGOL1,CAPG,POLQ,UBE2S,ICAM1,MCM2,CENPE,ANLN,SQLE,MTFP1,PLK4,NUF2,SNRPG,CCNA2,PLA2G7,GGCT,CDCA5,CENPU,UCHL1,ATAD2,BUB1B,CCNB2,HIST1H2BD,SLAMF8,FCER1G,CCR5,H2AFZ,POC1A,HMGB2,MAD2L1,KIAA0101,PLK1,TPX2,CD3D,TUBA1C,BIRC5,…
GO:1902850	Microtubule cytoskeleton organization involved in mitosis	30	112	1.09	1.46e-18	9606.ENSP00000216911,9606.ENSP00000217026,9606.ENSP00000256442,9606.ENSP00000257934,9606.ENSP00000260363,9606.ENSP00000260731,9606.ENSP00000261597,9606.ENSP00000265148,9606.ENSP00000271452,9606.ENSP00000296484,9606.ENSP00000296509,9606.ENSP00000300093,9606.ENSP00000300403,9606.ENSP00000301633,9606.ENSP00000313950,9606.ENSP00000326550,9606.ENSP00000336868,9606.ENSP00000355966,9606.ENSP00000358813,…	AURKA,MYBL2,CCNB1,ESPL1,KIF23,KIF11,NDC80,CENPE,NUF2,POC1A,MAD2L1,PLK1,TPX2,BIRC5,AURKB,TACC3,CENPA,NEK2,TTK,STIL,CDC20,RCC1,KIF4A,PRC1,WDR62,SAPCD2,KIFC1,RACGAP1,STMN1,NUSAP1
GO:0044770	Cell cycle phase transition	43	289	0.83	1.57e-18	9606.ENSP00000209728,9606.ENSP00000216911,9606.ENSP00000219097,9606.ENSP00000242208,9606.ENSP00000256442,9606.ENSP00000262105,9606.ENSP00000262300,9606.ENSP00000262643,9606.ENSP00000264552,9606.ENSP00000265056,9606.ENSP00000265728,9606.ENSP00000270861,9606.ENSP00000274026,9606.ENSP00000288207,9606.ENSP00000298048,9606.ENSP00000300093,9606.ENSP00000301633,9606.ENSP00000303706,9606.ENSP00000311083,…	CDC6,AURKA,ORC6,INHBA,CCNB1,MCM4,PKMYT1,CCNE1,UBE2S,MCM2,DBF4,PLK4,CCNA2,CCNB2,MELK,PLK1,BIRC5,CDC25A,CKS1B,CDC25C,E2F7,TACC3,CDKN3,EIF4EBP1,FOXM1,E2F1,UBE2C,RRM2,IQGAP3,NEK2,ORC1,RCC1,CKS2,PIM2,PCNA,CDK1,CDC7,CDC45,PTPRC,MCM10,CDKN2A,CCNE2,TIMELESS
GO:0051983	Regulation of chromosome segregation	29	104	1.1	2.48e-18	9606.ENSP00000166345,9606.ENSP00000209728,9606.ENSP00000247191,9606.ENSP00000256442,9606.ENSP00000257934,9606.ENSP00000261597,9606.ENSP00000265148,9606.ENSP00000275517,9606.ENSP00000287598,9606.ENSP00000296509,9606.ENSP00000300093,9606.ENSP00000301633,9606.ENSP00000302530,9606.ENSP00000305480,9606.ENSP00000313950,9606.ENSP00000318977,9606.ENSP00000323300,9606.ENSP00000326550,9606.ENSP00000348838,…	TRIP13,CDC6,DLGAP5,CCNB1,ESPL1,NDC80,CENPE,CDCA5,BUB1B,MAD2L1,PLK1,BIRC5,BUB1,FEN1,AURKB,GEN1,SPAG5,TACC3,UBE2C,HORMAD1,CENPF,NEK2,MKI67,TTK,KIF2C,CDC20,PTTG1,RACGAP1,DDX11
GO:0006333	Chromatin assembly or disassembly	36	193	0.93	4.3e-18	9606.ENSP00000244534,9606.ENSP00000244573,9606.ENSP00000263382,9606.ENSP00000265056,9606.ENSP00000281453,9606.ENSP00000289316,9606.ENSP00000296503,9606.ENSP00000307705,9606.ENSP00000321744,9606.ENSP00000330074,9606.ENSP00000333277,9606.ENSP00000335463,9606.ENSP00000336868,9606.ENSP00000346997,9606.ENSP00000347168,9606.ENSP00000349430,9606.ENSP00000352252,9606.ENSP00000355656,9606.ENSP00000357308,…	HIST1H1D,HIST1H1A,ASF1B,MCM2,CENPU,HIST1H2BD,HMGB2,HIST1H1E,HIST1H2BC,HIST1H1B,HIST2H3D,CASC5,CENPA,SUV39H2,HIST1H4J,HIST1H2BK,HIST1H3J,HIST3H2A,CENPW,HIST2H2BE,HIST2H3C,HIST1H2BL,HIST1H4H,HIST1H3D,HIST1H4C,CENPN,HELLS,HIST2H3A,HMGA1,HJURP,CDKN2A,H2AFX,HIST2H2BF,HIST1H2BJ,HIST3H2BB,HIST1H2BN
GO:0006955	Immune response	99	1588	0.45	6.07e-18	9606.ENSP00000216341,9606.ENSP00000219150,9606.ENSP00000229239,9606.ENSP00000236147,9606.ENSP00000236671,9606.ENSP00000250092,9606.ENSP00000256412,9606.ENSP00000257570,9606.ENSP00000259396,9606.ENSP00000260118,9606.ENSP00000261267,9606.ENSP00000261623,9606.ENSP00000262428,9606.ENSP00000262629,9606.ENSP00000262746,9606.ENSP00000264246,9606.ENSP00000264832,9606.ENSP00000271324,9606.ENSP00000271638,…	GZMB,CORO1A,GAPDH,SELL,CTSD,CD68,ADAMDEC1,OASL,ORM1,GGH,LYZ,CYBA,COTL1,TYROBP,PRDX1,CD80,ICAM1,CD53,S100A11,GZMA,CXCL13,FCER1G,CSTB,CCR5,S100P,HMGB2,CD3D,KRT16,CLEC7A,CTLA4,CXCL10,CXCL8,ISG20,CXCL11,PPP1R14B,TRIM59,C1QB,MARCO,ICOS,HIST1H2BC,APOBEC3B,CD86,SHMT2,PLAUR,OAS2,IFI6,CTSL,CTSB,TAP1,HIST1H2BK,CCL20,STAT1,PNP,CXCL9,ILF2,EXO1,RGS1,FCGR3A,SLAMF7,LAMTOR2,S100A7,S100A8,S100A9,CTSS,HIST2H2BE,FC…
GO:0071824	protein-DNA complex subunit organization	40	255	0.85	6.56e-18	9606.ENSP00000244534,9606.ENSP00000244573,9606.ENSP00000262105,9606.ENSP00000263382,9606.ENSP00000265056,9606.ENSP00000265148,9606.ENSP00000281453,9606.ENSP00000289316,9606.ENSP00000296503,9606.ENSP00000307705,9606.ENSP00000321744,9606.ENSP00000330074,9606.ENSP00000333277,9606.ENSP00000335463,9606.ENSP00000336868,9606.ENSP00000347168,9606.ENSP00000349430,9606.ENSP00000352252,9606.ENSP00000355656,…	HIST1H1D,HIST1H1A,MCM4,ASF1B,MCM2,CENPE,CENPU,HIST1H2BD,HMGB2,HIST1H1E,HIST1H2BC,HIST1H1B,HIST2H3D,CASC5,CENPA,HIST1H4J,HIST1H2BK,HIST1H3J,HIST3H2A,CENPF,CENPW,HIST2H2BE,HIST2H3C,HIST1H2BL,HIST1H4H,HIST1H3D,HIST1H4C,RAD51,CENPN,HELLS,HIST2H3A,HMGA1,CDC45,HJURP,H2AFX,HIST2H2BF,ANP32E,HIST1H2BJ,HIST3H2BB,HIST1H2BN
GO:0065004	protein-DNA complex assembly	37	213	0.9	9.07e-18	9606.ENSP00000244534,9606.ENSP00000244573,9606.ENSP00000262105,9606.ENSP00000263382,9606.ENSP00000265056,9606.ENSP00000265148,9606.ENSP00000281453,9606.ENSP00000289316,9606.ENSP00000296503,9606.ENSP00000307705,9606.ENSP00000321744,9606.ENSP00000330074,9606.ENSP00000333277,9606.ENSP00000335463,9606.ENSP00000336868,9606.ENSP00000347168,9606.ENSP00000349430,9606.ENSP00000352252,9606.ENSP00000355922,…	HIST1H1D,HIST1H1A,MCM4,ASF1B,MCM2,CENPE,CENPU,HIST1H2BD,HMGB2,HIST1H1E,HIST1H2BC,HIST1H1B,HIST2H3D,CASC5,CENPA,HIST1H4J,HIST1H2BK,HIST1H3J,CENPF,CENPW,HIST2H2BE,HIST2H3C,HIST1H2BL,HIST1H4H,HIST1H3D,HIST1H4C,RAD51,CENPN,HELLS,HIST2H3A,CDC45,HJURP,H2AFX,HIST2H2BF,HIST1H2BJ,HIST3H2BB,HIST1H2BN
GO:0031497	Chromatin assembly	34	172	0.95	9.48e-18	9606.ENSP00000244534,9606.ENSP00000244573,9606.ENSP00000263382,9606.ENSP00000265056,9606.ENSP00000281453,9606.ENSP00000289316,9606.ENSP00000296503,9606.ENSP00000307705,9606.ENSP00000321744,9606.ENSP00000330074,9606.ENSP00000333277,9606.ENSP00000335463,9606.ENSP00000336868,9606.ENSP00000347168,9606.ENSP00000349430,9606.ENSP00000352252,9606.ENSP00000357308,9606.ENSP00000358151,9606.ENSP00000358154,…	HIST1H1D,HIST1H1A,ASF1B,MCM2,CENPU,HIST1H2BD,HMGB2,HIST1H1E,HIST1H2BC,HIST1H1B,HIST2H3D,CASC5,CENPA,HIST1H4J,HIST1H2BK,HIST1H3J,CENPW,HIST2H2BE,HIST2H3C,HIST1H2BL,HIST1H4H,HIST1H3D,HIST1H4C,CENPN,HELLS,HIST2H3A,HMGA1,HJURP,CDKN2A,H2AFX,HIST2H2BF,HIST1H2BJ,HIST3H2BB,HIST1H2BN
GO:0006334	Nucleosome assembly	31	135	1.02	1.09e-17	9606.ENSP00000244534,9606.ENSP00000244573,9606.ENSP00000263382,9606.ENSP00000265056,9606.ENSP00000281453,9606.ENSP00000289316,9606.ENSP00000296503,9606.ENSP00000307705,9606.ENSP00000321744,9606.ENSP00000330074,9606.ENSP00000333277,9606.ENSP00000335463,9606.ENSP00000336868,9606.ENSP00000347168,9606.ENSP00000349430,9606.ENSP00000352252,9606.ENSP00000357308,9606.ENSP00000358151,9606.ENSP00000358154,…	HIST1H1D,HIST1H1A,ASF1B,MCM2,CENPU,HIST1H2BD,HMGB2,HIST1H1E,HIST1H2BC,HIST1H1B,HIST2H3D,CASC5,CENPA,HIST1H4J,HIST1H2BK,HIST1H3J,CENPW,HIST2H2BE,HIST2H3C,HIST1H2BL,HIST1H4H,HIST1H3D,HIST1H4C,CENPN,HIST2H3A,HJURP,H2AFX,HIST2H2BF,HIST1H2BJ,HIST3H2BB,HIST1H2BN
GO:0006950	Response to stress	158	3485	0.32	1.5e-17	9606.ENSP00000166345,9606.ENSP00000216117,9606.ENSP00000216341,9606.ENSP00000216802,9606.ENSP00000216911,9606.ENSP00000219150,9606.ENSP00000219919,9606.ENSP00000221486,9606.ENSP00000226279,9606.ENSP00000228843,9606.ENSP00000229239,9606.ENSP00000233893,9606.ENSP00000242208,9606.ENSP00000250092,9606.ENSP00000256442,9606.ENSP00000257570,9606.ENSP00000259396,9606.ENSP00000261267,9606.ENSP00000261623,…	TRIP13,HMOX1,GZMB,PSME2,AURKA,CORO1A,AQP9,RNASEH2A,CD38,RAD51AP1,GAPDH,HSPE1,INHBA,CD68,CCNB1,OASL,ORM1,LYZ,CYBA,MCM4,COTL1,TYROBP,PRDX1,POLQ,NEIL3,ICAM1,MCM2,TFEC,GAL,BCL2A1,CCNA2,CDCA5,GSDMC,UCHL1,PDIA4,CXCL13,SLAMF8,FCER1G,CCR5,HMGB2,MELK,KIAA0101,PLK1,KRT16,CLEC7A,CTLA4,FEN1,CXCL10,CXCL8,ISG20,CXCL11,PPP1R14B,FANCI,TRIM59,CLSPN,C1QB,MARCO,GEN1,EZH2,CALR,CDC25C,HIST1H2BC,DCTPP1,E2F7,PMAIP1,APO…
GO:0034728	Nucleosome organization	34	176	0.95	1.62e-17	9606.ENSP00000244534,9606.ENSP00000244573,9606.ENSP00000263382,9606.ENSP00000265056,9606.ENSP00000281453,9606.ENSP00000289316,9606.ENSP00000296503,9606.ENSP00000307705,9606.ENSP00000321744,9606.ENSP00000330074,9606.ENSP00000333277,9606.ENSP00000335463,9606.ENSP00000336868,9606.ENSP00000347168,9606.ENSP00000349430,9606.ENSP00000352252,9606.ENSP00000355656,9606.ENSP00000357308,9606.ENSP00000358151,…	HIST1H1D,HIST1H1A,ASF1B,MCM2,CENPU,HIST1H2BD,HMGB2,HIST1H1E,HIST1H2BC,HIST1H1B,HIST2H3D,CASC5,CENPA,HIST1H4J,HIST1H2BK,HIST1H3J,HIST3H2A,CENPW,HIST2H2BE,HIST2H3C,HIST1H2BL,HIST1H4H,HIST1H3D,HIST1H4C,CENPN,HIST2H3A,HMGA1,HJURP,H2AFX,HIST2H2BF,ANP32E,HIST1H2BJ,HIST3H2BB,HIST1H2BN
GO:0044772	Mitotic cell cycle phase transition	41	280	0.82	1.65e-17	9606.ENSP00000209728,9606.ENSP00000216911,9606.ENSP00000219097,9606.ENSP00000242208,9606.ENSP00000256442,9606.ENSP00000262105,9606.ENSP00000262300,9606.ENSP00000262643,9606.ENSP00000264552,9606.ENSP00000265056,9606.ENSP00000265728,9606.ENSP00000270861,9606.ENSP00000274026,9606.ENSP00000288207,9606.ENSP00000298048,9606.ENSP00000300093,9606.ENSP00000301633,9606.ENSP00000303706,9606.ENSP00000311083,…	CDC6,AURKA,ORC6,INHBA,CCNB1,MCM4,PKMYT1,CCNE1,UBE2S,MCM2,DBF4,PLK4,CCNA2,CCNB2,MELK,PLK1,BIRC5,CDC25A,CKS1B,CDC25C,E2F7,TACC3,CDKN3,EIF4EBP1,FOXM1,E2F1,UBE2C,RRM2,IQGAP3,NEK2,ORC1,RCC1,CKS2,PIM2,PCNA,CDK1,CDC7,CDC45,MCM10,CDKN2A,CCNE2
GO:0007346	Regulation of mitotic cell cycle	60	676	0.61	2.02e-16	9606.ENSP00000166345,9606.ENSP00000209728,9606.ENSP00000216802,9606.ENSP00000216911,9606.ENSP00000247191,9606.ENSP00000256442,9606.ENSP00000257934,9606.ENSP00000260731,9606.ENSP00000261597,9606.ENSP00000262300,9606.ENSP00000265148,9606.ENSP00000265748,9606.ENSP00000270861,9606.ENSP00000275517,9606.ENSP00000287598,9606.ENSP00000296509,9606.ENSP00000300093,9606.ENSP00000300403,9606.ENSP00000301633,…	TRIP13,CDC6,PSME2,AURKA,DLGAP5,CCNB1,ESPL1,KIF11,NDC80,PKMYT1,CENPE,ANLN,PLK4,CDCA5,BUB1B,MAD2L1,PLK1,TPX2,BIRC5,BUB1,CDC25A,CKS1B,CLSPN,AURKB,GEN1,EZH2,CDC25C,E2F7,TACC3,EIF4EBP1,E2F1,BLM,UBE2C,CENPF,DTL,NEK2,KIF14,MKI67,TTK,PSRC1,ORC1,CDC20,RCC1,ZWINT,PSMB9,CKS2,PIM2,UBD,PCNA,HMMR,PTTG1,MST4,INCENP,CDK1,CDC7,CDC45,TOP2A,CDKN2A,NUSAP1,E2F8
GO:0007052	Mitotic spindle organization	24	81	1.13	1.46e-15	9606.ENSP00000216911,9606.ENSP00000217026,9606.ENSP00000256442,9606.ENSP00000260363,9606.ENSP00000260731,9606.ENSP00000261597,9606.ENSP00000265148,9606.ENSP00000271452,9606.ENSP00000296484,9606.ENSP00000300403,9606.ENSP00000301633,9606.ENSP00000313950,9606.ENSP00000326550,9606.ENSP00000355966,9606.ENSP00000358813,9606.ENSP00000360944,9606.ENSP00000361540,9606.ENSP00000362937,9606.ENSP00000363524,…	AURKA,MYBL2,CCNB1,KIF23,KIF11,NDC80,CENPE,NUF2,POC1A,TPX2,BIRC5,AURKB,TACC3,NEK2,TTK,STIL,CDC20,RCC1,KIF4A,PRC1,WDR62,KIFC1,RACGAP1,STMN1
GO:0051783	Regulation of nuclear division	32	186	0.89	3.85e-15	9606.ENSP00000166345,9606.ENSP00000209728,9606.ENSP00000216911,9606.ENSP00000247191,9606.ENSP00000256442,9606.ENSP00000257934,9606.ENSP00000260731,9606.ENSP00000261597,9606.ENSP00000262300,9606.ENSP00000265148,9606.ENSP00000265748,9606.ENSP00000275517,9606.ENSP00000287598,9606.ENSP00000296509,9606.ENSP00000300093,9606.ENSP00000301633,9606.ENSP00000302530,9606.ENSP00000313950,9606.ENSP00000318977,…	TRIP13,CDC6,AURKA,DLGAP5,CCNB1,ESPL1,KIF11,NDC80,PKMYT1,CENPE,ANLN,CDCA5,BUB1B,MAD2L1,PLK1,BIRC5,BUB1,AURKB,GEN1,CALR,CDC25C,TACC3,UBE2C,HORMAD1,CENPF,NEK2,MKI67,TTK,CDC20,RCC1,PTTG1,NUSAP1
GO:0007051	Spindle organization	29	145	0.96	3.98e-15	9606.ENSP00000216911,9606.ENSP00000217026,9606.ENSP00000256442,9606.ENSP00000257934,9606.ENSP00000260363,9606.ENSP00000260731,9606.ENSP00000261597,9606.ENSP00000265148,9606.ENSP00000271452,9606.ENSP00000296484,9606.ENSP00000300403,9606.ENSP00000301633,9606.ENSP00000313950,9606.ENSP00000323300,9606.ENSP00000326550,9606.ENSP00000355966,9606.ENSP00000356379,9606.ENSP00000357308,9606.ENSP00000358813,…	AURKA,MYBL2,CCNB1,ESPL1,KIF23,KIF11,NDC80,CENPE,NUF2,POC1A,TPX2,BIRC5,AURKB,SPAG5,TACC3,NEK2,ASPM,CENPW,TTK,STIL,CDC20,RCC1,KIF4A,PRC1,INCENP,WDR62,KIFC1,RACGAP1,STMN1
GO:0006259	DNA metabolic process	61	750	0.57	4.46e-15	9606.ENSP00000166345,9606.ENSP00000209728,9606.ENSP00000219097,9606.ENSP00000221486,9606.ENSP00000228843,9606.ENSP00000240488,9606.ENSP00000261600,9606.ENSP00000262105,9606.ENSP00000262643,9606.ENSP00000264233,9606.ENSP00000264596,9606.ENSP00000265056,9606.ENSP00000275517,9606.ENSP00000296503,9606.ENSP00000300035,9606.ENSP00000301634,9606.ENSP00000305480,9606.ENSP00000306565,9606.ENSP00000310842,…	TRIP13,CDC6,ORC6,RNASEH2A,RAD51AP1,MND1,THOC1,MCM4,CCNE1,POLQ,NEIL3,MCM2,CDCA5,HMGB2,KIAA0101,TK1,FEN1,ISG20,FANCI,CLSPN,GEN1,EZH2,DCTPP1,APOBEC3B,PIF1,LIN9,NME1,FOXM1,HIST1H4J,BLM,WDHD1,EXO1,HIST3H2A,CENPF,DTL,UBE2T,HMGB3,ORC1,RAD54L,HIST1H4H,HIST1H4C,PCNA,ISG15,RAD51,FANCA,PTTG1,HELLS,CDK1,CBSL,TONSL,CDC7,HMGA1,CDC45,TOP2A,MCM10,CCNE2,H2AFX,KPNA2,DDX11,TIMELESS,RECQL4
GO:0007088	Regulation of mitotic nuclear division	30	162	0.93	6.56e-15	9606.ENSP00000166345,9606.ENSP00000209728,9606.ENSP00000216911,9606.ENSP00000247191,9606.ENSP00000256442,9606.ENSP00000257934,9606.ENSP00000260731,9606.ENSP00000261597,9606.ENSP00000262300,9606.ENSP00000265148,9606.ENSP00000265748,9606.ENSP00000275517,9606.ENSP00000287598,9606.ENSP00000296509,9606.ENSP00000300093,9606.ENSP00000301633,9606.ENSP00000302530,9606.ENSP00000313950,9606.ENSP00000318977,…	TRIP13,CDC6,AURKA,DLGAP5,CCNB1,ESPL1,KIF11,NDC80,PKMYT1,CENPE,ANLN,CDCA5,BUB1B,MAD2L1,PLK1,BIRC5,BUB1,AURKB,GEN1,CDC25C,TACC3,UBE2C,CENPF,NEK2,MKI67,TTK,CDC20,RCC1,PTTG1,NUSAP1
GO:0044419	Interspecies interaction between organisms	102	1899	0.39	2e-14	9606.ENSP00000216341,9606.ENSP00000219150,9606.ENSP00000229239,9606.ENSP00000250092,9606.ENSP00000256722,9606.ENSP00000257570,9606.ENSP00000259938,9606.ENSP00000261267,9606.ENSP00000261600,9606.ENSP00000261623,9606.ENSP00000262428,9606.ENSP00000262629,9606.ENSP00000262746,9606.ENSP00000264246,9606.ENSP00000264832,9606.ENSP00000274026,9606.ENSP00000274306,9606.ENSP00000276708,9606.ENSP00000280326,…	GZMB,CORO1A,GAPDH,CD68,CMPK2,OASL,CLPS,LYZ,THOC1,CYBA,COTL1,TYROBP,PRDX1,CD80,ICAM1,CCNA2,GZMA,GSDMC,CCT5,CENPU,CXCL13,SLAMF8,FCER1G,CCR5,HMGB2,KRT16,BUB1,CLEC7A,CXCL10,CXCL8,ISG20,CXCL11,PPP1R14B,TRIM59,C1QB,MARCO,CDC25C,HIST1H2BC,MMP1,PMAIP1,APOBEC3B,CD86,SHMT2,CENPA,C15orf48,OAS2,IFI6,IKZF3,E2F1,CTSB,TAP1,FN1,HIST1H2BK,CCL20,STAT1,CXCL9,RGS1,SLAMF7,S100A7,S100A8,S100A9,HIST2H2BE,FCGR1A,IRAK1,H…
GO:0033045	Regulation of sister chromatid segregation	23	83	1.1	2.2e-14	9606.ENSP00000166345,9606.ENSP00000209728,9606.ENSP00000247191,9606.ENSP00000256442,9606.ENSP00000257934,9606.ENSP00000261597,9606.ENSP00000265148,9606.ENSP00000275517,9606.ENSP00000287598,9606.ENSP00000296509,9606.ENSP00000300093,9606.ENSP00000301633,9606.ENSP00000302530,9606.ENSP00000305480,9606.ENSP00000313950,9606.ENSP00000318977,9606.ENSP00000326550,9606.ENSP00000348838,9606.ENSP00000355922,…	TRIP13,CDC6,DLGAP5,CCNB1,ESPL1,NDC80,CENPE,CDCA5,BUB1B,MAD2L1,PLK1,BIRC5,BUB1,FEN1,AURKB,GEN1,TACC3,UBE2C,CENPF,TTK,CDC20,PTTG1,DDX11
GO:0000226	Microtubule cytoskeleton organization	48	492	0.65	2.64e-14	9606.ENSP00000216911,9606.ENSP00000217026,9606.ENSP00000229239,9606.ENSP00000256442,9606.ENSP00000257934,9606.ENSP00000260363,9606.ENSP00000260731,9606.ENSP00000261597,9606.ENSP00000263181,9606.ENSP00000263753,9606.ENSP00000265148,9606.ENSP00000270861,9606.ENSP00000271452,9606.ENSP00000296484,9606.ENSP00000296509,9606.ENSP00000300035,9606.ENSP00000300093,9606.ENSP00000300403,9606.ENSP00000301072,…	AURKA,MYBL2,GAPDH,CCNB1,ESPL1,KIF23,KIF11,NDC80,KIF18A,SGOL1,CENPE,PLK4,NUF2,POC1A,MAD2L1,KIAA0101,PLK1,TPX2,TUBA1C,BIRC5,AURKB,SPAG5,TACC3,CENPA,NEK2,ASPM,CENPW,TTK,PSRC1,STIL,KIF2C,CDC20,RCC1,KIF4A,CALML5,PRC1,INCENP,KIF20A,CDK1,WDR62,SAPCD2,KIFC1,RACGAP1,STMN1,GAS2L3,ENSG00000258947,NUSAP1,KIF18B
GO:1901987	Regulation of cell cycle phase transition	46	452	0.67	2.75e-14	9606.ENSP00000166345,9606.ENSP00000209728,9606.ENSP00000216802,9606.ENSP00000216911,9606.ENSP00000247191,9606.ENSP00000256442,9606.ENSP00000257934,9606.ENSP00000261597,9606.ENSP00000265148,9606.ENSP00000265728,9606.ENSP00000265748,9606.ENSP00000270861,9606.ENSP00000275517,9606.ENSP00000287598,9606.ENSP00000296509,9606.ENSP00000300093,9606.ENSP00000300403,9606.ENSP00000301633,9606.ENSP00000302530,…	TRIP13,CDC6,PSME2,AURKA,DLGAP5,CCNB1,ESPL1,NDC80,CENPE,DBF4,ANLN,PLK4,CDCA5,BUB1B,MAD2L1,PLK1,TPX2,BIRC5,BUB1,CDC25A,CLSPN,AURKB,GEN1,EZH2,CDC25C,E2F7,E2F1,BLM,UBE2C,CENPF,DTL,NEK2,KIF14,TTK,ORC1,CDC20,PSMB9,UBD,PCNA,HMMR,CDK1,CDC7,CDC45,CDKN2A,E2F8,FAM83D
GO:1901990	Regulation of mitotic cell cycle phase transition	44	416	0.68	3.64e-14	9606.ENSP00000166345,9606.ENSP00000209728,9606.ENSP00000216802,9606.ENSP00000216911,9606.ENSP00000247191,9606.ENSP00000256442,9606.ENSP00000257934,9606.ENSP00000261597,9606.ENSP00000265148,9606.ENSP00000265748,9606.ENSP00000270861,9606.ENSP00000275517,9606.ENSP00000287598,9606.ENSP00000296509,9606.ENSP00000300093,9606.ENSP00000300403,9606.ENSP00000301633,9606.ENSP00000302530,9606.ENSP00000303706,…	TRIP13,CDC6,PSME2,AURKA,DLGAP5,CCNB1,ESPL1,NDC80,CENPE,ANLN,PLK4,CDCA5,BUB1B,MAD2L1,PLK1,TPX2,BIRC5,BUB1,CDC25A,CLSPN,AURKB,GEN1,EZH2,CDC25C,E2F7,E2F1,BLM,UBE2C,CENPF,DTL,NEK2,KIF14,TTK,ORC1,CDC20,PSMB9,UBD,PCNA,HMMR,CDK1,CDC7,CDC45,CDKN2A,E2F8
GO:0006260	DNA replication	32	205	0.85	3.77e-14	9606.ENSP00000209728,9606.ENSP00000219097,9606.ENSP00000221486,9606.ENSP00000261600,9606.ENSP00000262105,9606.ENSP00000262643,9606.ENSP00000264233,9606.ENSP00000265056,9606.ENSP00000265728,9606.ENSP00000300035,9606.ENSP00000305480,9606.ENSP00000312995,9606.ENSP00000318977,9606.ENSP00000328174,9606.ENSP00000347232,9606.ENSP00000353770,9606.ENSP00000353793,9606.ENSP00000355506,9606.ENSP00000355958,…	CDC6,ORC6,RNASEH2A,THOC1,MCM4,CCNE1,POLQ,MCM2,DBF4,KIAA0101,FEN1,CLSPN,GEN1,PIF1,BLM,RRM2,WDHD1,EXO1,DTL,ORC1,PCNA,RAD51,CDK1,TONSL,CDC7,HMGA1,CDC45,MCM10,CCNE2,DDX11,TIMELESS,RECQL4
GO:0051707	Response to other organism	79	1256	0.46	4.07e-14	9606.ENSP00000216341,9606.ENSP00000219150,9606.ENSP00000229239,9606.ENSP00000250092,9606.ENSP00000256722,9606.ENSP00000257570,9606.ENSP00000259938,9606.ENSP00000261267,9606.ENSP00000261623,9606.ENSP00000262428,9606.ENSP00000262629,9606.ENSP00000262746,9606.ENSP00000264246,9606.ENSP00000264832,9606.ENSP00000274306,9606.ENSP00000276708,9606.ENSP00000280326,9606.ENSP00000286758,9606.ENSP00000289707,…	GZMB,CORO1A,GAPDH,CD68,CMPK2,OASL,CLPS,LYZ,CYBA,COTL1,TYROBP,PRDX1,CD80,ICAM1,GZMA,GSDMC,CCT5,CXCL13,SLAMF8,FCER1G,CCR5,HMGB2,KRT16,CLEC7A,CXCL10,CXCL8,ISG20,CXCL11,PPP1R14B,TRIM59,C1QB,MARCO,HIST1H2BC,PMAIP1,APOBEC3B,CD86,SHMT2,C15orf48,OAS2,IFI6,IKZF3,HIST1H2BK,CCL20,STAT1,CXCL9,RGS1,SLAMF7,S100A7,S100A8,S100A9,HIST2H2BE,FCGR1A,IRAK1,HMGB3,GBP5,IFI44L,SRPK1,C1QA,HLA-DQA2,HLA-DQB1,PIM2,UBD,CYBB,…
GO:0045787	Positive regulation of cell cycle	42	388	0.69	8.25e-14	9606.ENSP00000209728,9606.ENSP00000216911,9606.ENSP00000247191,9606.ENSP00000256442,9606.ENSP00000257934,9606.ENSP00000260363,9606.ENSP00000261597,9606.ENSP00000261600,9606.ENSP00000265728,9606.ENSP00000270861,9606.ENSP00000275517,9606.ENSP00000296484,9606.ENSP00000296509,9606.ENSP00000301633,9606.ENSP00000303706,9606.ENSP00000305480,9606.ENSP00000311083,9606.ENSP00000313950,9606.ENSP00000318977,…	CDC6,AURKA,DLGAP5,CCNB1,ESPL1,KIF23,NDC80,THOC1,DBF4,PLK4,CDCA5,POC1A,MAD2L1,BIRC5,CDC25A,FEN1,CKS1B,AURKB,GEN1,EZH2,CALR,CDC25C,E2F7,SPAG5,EIF4EBP1,E2F1,UBE2C,DTL,KIF14,PSRC1,CKS2,PCNA,CIT,CDK1,CDC7,RACGAP1,CDC45,CDKN2A,DDX11,NUSAP1,E2F8,FAM83D
GO:0010965	Regulation of mitotic sister chromatid separation	20	60	1.18	1.07e-13	9606.ENSP00000166345,9606.ENSP00000209728,9606.ENSP00000247191,9606.ENSP00000256442,9606.ENSP00000257934,9606.ENSP00000261597,9606.ENSP00000265148,9606.ENSP00000287598,9606.ENSP00000296509,9606.ENSP00000300093,9606.ENSP00000301633,9606.ENSP00000302530,9606.ENSP00000313950,9606.ENSP00000318977,9606.ENSP00000326550,9606.ENSP00000348838,9606.ENSP00000355922,9606.ENSP00000358813,9606.ENSP00000361540,…	TRIP13,CDC6,DLGAP5,CCNB1,ESPL1,NDC80,CENPE,BUB1B,MAD2L1,PLK1,BIRC5,BUB1,AURKB,GEN1,TACC3,UBE2C,CENPF,TTK,CDC20,PTTG1
GO:0090068	Positive regulation of cell cycle process	36	294	0.75	3.75e-13	9606.ENSP00000209728,9606.ENSP00000216911,9606.ENSP00000247191,9606.ENSP00000256442,9606.ENSP00000257934,9606.ENSP00000260363,9606.ENSP00000261597,9606.ENSP00000265728,9606.ENSP00000270861,9606.ENSP00000275517,9606.ENSP00000296484,9606.ENSP00000296509,9606.ENSP00000301633,9606.ENSP00000303706,9606.ENSP00000305480,9606.ENSP00000313950,9606.ENSP00000318977,9606.ENSP00000320147,9606.ENSP00000321656,…	CDC6,AURKA,DLGAP5,CCNB1,ESPL1,KIF23,NDC80,DBF4,PLK4,CDCA5,POC1A,MAD2L1,BIRC5,CDC25A,FEN1,AURKB,GEN1,EZH2,CDC25C,E2F7,SPAG5,E2F1,UBE2C,DTL,KIF14,PCNA,CIT,CDK1,CDC7,RACGAP1,CDC45,CDKN2A,DDX11,NUSAP1,E2F8,FAM83D
GO:0000075	Cell cycle checkpoint	30	198	0.84	6.13e-13	9606.ENSP00000166345,9606.ENSP00000209728,9606.ENSP00000216911,9606.ENSP00000256442,9606.ENSP00000287598,9606.ENSP00000296509,9606.ENSP00000300093,9606.ENSP00000301633,9606.ENSP00000302530,9606.ENSP00000312995,9606.ENSP00000313950,9606.ENSP00000321656,9606.ENSP00000322568,9606.ENSP00000323246,9606.ENSP00000345571,9606.ENSP00000347232,9606.ENSP00000355167,9606.ENSP00000355922,9606.ENSP00000355958,…	TRIP13,CDC6,AURKA,CCNB1,BUB1B,MAD2L1,PLK1,BIRC5,BUB1,CLSPN,AURKB,CDC25C,SOX11,E2F7,E2F1,BLM,HORMAD1,CENPF,DTL,TTK,ORC1,CDC20,ZWINT,PCNA,CDK1,CDC45,TOP2A,H2AFX,TIMELESS,E2F8
GO:0006325	Chromatin organization	55	713	0.55	1.23e-12	9606.ENSP00000216911,9606.ENSP00000244534,9606.ENSP00000244573,9606.ENSP00000256442,9606.ENSP00000263382,9606.ENSP00000265056,9606.ENSP00000274026,9606.ENSP00000281453,9606.ENSP00000287394,9606.ENSP00000289316,9606.ENSP00000296417,9606.ENSP00000296503,9606.ENSP00000307705,9606.ENSP00000308750,9606.ENSP00000313950,9606.ENSP00000320147,9606.ENSP00000321744,9606.ENSP00000330074,9606.ENSP00000332790,…	AURKA,HIST1H1D,HIST1H1A,CCNB1,ASF1B,MCM2,CCNA2,CENPU,ATAD2,HIST1H2BD,H2AFZ,HMGB2,HIST1H1E,CBX2,AURKB,EZH2,HIST1H2BC,HIST1H1B,HIST2H2AB,HIST2H3D,CASC5,CENPA,HIST1H2AD,SUV39H2,HIST1H4J,HIST1H2BK,HIST1H2AI,HIST1H2AG,HIST1H3J,HIST3H2A,CENPW,HIST2H2BE,HIST2H3C,HIST2H2AA,HMGB3,SRPK1,HIST1H2BL,HIST1H4H,HIST1H3D,HIST1H4C,CENPN,HELLS,INCENP,CDK1,HIST2H3A,HMGA1,HJURP,CDKN2A,H2AFX,DDX11,HIST2H2BF,ANP32E,HIS…
GO:0006952	Defense response	77	1296	0.43	1.63e-12	9606.ENSP00000216117,9606.ENSP00000216341,9606.ENSP00000219150,9606.ENSP00000229239,9606.ENSP00000242208,9606.ENSP00000250092,9606.ENSP00000257570,9606.ENSP00000259396,9606.ENSP00000261267,9606.ENSP00000261623,9606.ENSP00000262428,9606.ENSP00000262629,9606.ENSP00000262746,9606.ENSP00000264832,9606.ENSP00000265643,9606.ENSP00000276708,9606.ENSP00000286758,9606.ENSP00000289707,9606.ENSP00000289902,…	HMOX1,GZMB,CORO1A,GAPDH,INHBA,CD68,OASL,ORM1,LYZ,CYBA,COTL1,TYROBP,PRDX1,ICAM1,GAL,GSDMC,CXCL13,SLAMF8,FCER1G,CCR5,HMGB2,KRT16,CLEC7A,CXCL10,CXCL8,ISG20,CXCL11,PPP1R14B,TRIM59,C1QB,MARCO,HIST1H2BC,PMAIP1,APOBEC3B,SHMT2,FPR3,OAS2,IFI6,TAP1,FN1,HIST1H2BK,CCL20,STAT1,CXCL9,SLAMF7,S100A7,S100A8,S100A9,HIST2H2BE,FCGR1A,IRAK1,HMGB3,GBP5,IFI44L,SRPK1,C1QA,HLA-DQA2,HLA-DQB1,UBD,CYBB,ISG15,SDC1,RSAD2,SP14…
GO:0030071	Regulation of mitotic metaphase/anaphase transition	18	56	1.17	4.83e-12	9606.ENSP00000166345,9606.ENSP00000209728,9606.ENSP00000247191,9606.ENSP00000256442,9606.ENSP00000257934,9606.ENSP00000261597,9606.ENSP00000265148,9606.ENSP00000287598,9606.ENSP00000296509,9606.ENSP00000300093,9606.ENSP00000301633,9606.ENSP00000302530,9606.ENSP00000313950,9606.ENSP00000318977,9606.ENSP00000348838,9606.ENSP00000355922,9606.ENSP00000358813,9606.ENSP00000361540	TRIP13,CDC6,DLGAP5,CCNB1,ESPL1,NDC80,CENPE,BUB1B,MAD2L1,PLK1,BIRC5,BUB1,AURKB,GEN1,UBE2C,CENPF,TTK,CDC20
GO:0033043	Regulation of organelle organization	76	1306	0.42	6.87e-12	9606.ENSP00000166345,9606.ENSP00000209728,9606.ENSP00000216341,9606.ENSP00000216911,9606.ENSP00000219150,9606.ENSP00000225655,9606.ENSP00000233143,9606.ENSP00000244534,9606.ENSP00000244573,9606.ENSP00000247191,9606.ENSP00000256442,9606.ENSP00000257934,9606.ENSP00000260731,9606.ENSP00000261597,9606.ENSP00000262300,9606.ENSP00000262428,9606.ENSP00000263181,9606.ENSP00000263867,9606.ENSP00000264832,…	TRIP13,CDC6,GZMB,AURKA,CORO1A,PFN1,TMSB10,HIST1H1D,HIST1H1A,DLGAP5,CCNB1,ESPL1,KIF11,NDC80,PKMYT1,COTL1,KIF18A,CAPG,ICAM1,MCM2,CENPE,ANLN,PLK4,CDCA5,CCT5,ATAD2,BUB1B,POC1A,MAD2L1,PLK1,TPX2,BIRC5,BUB1,FEN1,HIST1H1E,AURKB,GEN1,SKA3,CALR,CDC25C,SPAG5,PMAIP1,TACC3,PIF1,HIST1H1B,PLAUR,E2F1,UBE2C,IQGAP3,HORMAD1,CENPF,NEK2,PFDN2,MKI67,S100A8,S100A9,TTK,PSRC1,SLC25A5,STIL,MMP9,CDC20,RCC1,CKAP2,SDC1,PTTG1…
GO:0044843	Cell cycle g1/s phase transition	24	130	0.93	8.3e-12	9606.ENSP00000209728,9606.ENSP00000219097,9606.ENSP00000242208,9606.ENSP00000262105,9606.ENSP00000262643,9606.ENSP00000265056,9606.ENSP00000265728,9606.ENSP00000274026,9606.ENSP00000303706,9606.ENSP00000323246,9606.ENSP00000335357,9606.ENSP00000340691,9606.ENSP00000345571,9606.ENSP00000353770,9606.ENSP00000354451,9606.ENSP00000360623,9606.ENSP00000362937,9606.ENSP00000365692,9606.ENSP00000368458,…	CDC6,ORC6,INHBA,MCM4,CCNE1,MCM2,DBF4,CCNA2,CDC25A,E2F7,CDKN3,EIF4EBP1,E2F1,RRM2,IQGAP3,ORC1,RCC1,PIM2,PCNA,CDC7,CDC45,MCM10,CDKN2A,CCNE2
GO:0009987	Cellular process	390	15024	0.07	9.19e-12	9606.ENSP00000005286,9606.ENSP00000166345,9606.ENSP00000209728,9606.ENSP00000215743,9606.ENSP00000216117,9606.ENSP00000216341,9606.ENSP00000216802,9606.ENSP00000216911,9606.ENSP00000217026,9606.ENSP00000219097,9606.ENSP00000219150,9606.ENSP00000219919,9606.ENSP00000221486,9606.ENSP00000225655,9606.ENSP00000226279,9606.ENSP00000228843,9606.ENSP00000229238,9606.ENSP00000229239,9606.ENSP00000229270,…	TMEM132A,TRIP13,CDC6,MMP11,HMOX1,GZMB,PSME2,AURKA,MYBL2,ORC6,CORO1A,AQP9,RNASEH2A,PFN1,CD38,RAD51AP1,MRPL51,GAPDH,TPI1,TMSB10,HSPE1,SELL,CTSD,RDH10,NCAPH,MND1,INHBA,DDX39A,HIST1H1D,HIST1H1A,DLGAP5,CD68,WISP1,NCAPG,CCNB1,CMPK2,OASL,TROAP,ESPL1,ORM1,CLPS,MRPL15,GGH,KIF23,KIF11,LYZ,LMNB1,NDC80,THOC1,SLC7A5,CYBA,MCM4,PKMYT1,COTL1,TYROBP,CCNE1,PRDX1,KIF18A,ASF1B,EPCAM,SGOL1,CAPG,POLQ,CD80,UBE2S,NEIL3,…
GO:1903046	Meiotic cell cycle process	26	165	0.86	1.82e-11	9606.ENSP00000166345,9606.ENSP00000216911,9606.ENSP00000240423,9606.ENSP00000240488,9606.ENSP00000257934,9606.ENSP00000262643,9606.ENSP00000263181,9606.ENSP00000263753,9606.ENSP00000271452,9606.ENSP00000287598,9606.ENSP00000300093,9606.ENSP00000302530,9606.ENSP00000325017,9606.ENSP00000349961,9606.ENSP00000355167,9606.ENSP00000356379,9606.ENSP00000358813,9606.ENSP00000361043,9606.ENSP00000364976,…	TRIP13,AURKA,NCAPH,MND1,ESPL1,CCNE1,KIF18A,SGOL1,NUF2,BUB1B,PLK1,BUB1,NCAPD2,SMC4,HORMAD1,ASPM,TTK,RAD54L,CKS2,RAD51,FANCA,PTTG1,INCENP,TOP2A,CCNE2,MYBL1
GO:0050896	Response to stimulus	254	8046	0.16	1.88e-11	9606.ENSP00000166345,9606.ENSP00000209728,9606.ENSP00000216117,9606.ENSP00000216341,9606.ENSP00000216802,9606.ENSP00000216911,9606.ENSP00000217026,9606.ENSP00000219150,9606.ENSP00000219919,9606.ENSP00000221486,9606.ENSP00000225655,9606.ENSP00000226279,9606.ENSP00000228843,9606.ENSP00000229239,9606.ENSP00000233893,9606.ENSP00000236147,9606.ENSP00000236671,9606.ENSP00000242208,9606.ENSP00000247191,…	TRIP13,CDC6,HMOX1,GZMB,PSME2,AURKA,MYBL2,CORO1A,AQP9,RNASEH2A,PFN1,CD38,RAD51AP1,GAPDH,HSPE1,SELL,CTSD,INHBA,DLGAP5,CD68,WISP1,ADAMDEC1,CCNB1,CMPK2,OASL,ORM1,CLPS,MRPL15,GGH,LYZ,LMNB1,THOC1,CYBA,MCM4,COTL1,TYROBP,CCNE1,PRDX1,KIF18A,EPCAM,POLQ,CD80,NEIL3,ICAM1,MCM2,TFEC,GAL,SQLE,MTFP1,ARNTL2,BCL2A1,CD53,S100A11,CCNA2,GZMA,GGCT,CDCA5,GSDMC,PPP4C,CCT5,UCHL1,PDIA4,CXCL13,SLAMF8,FCER1G,CSTB,CCR5,LAPTM…
GO:0140013	Meiotic nuclear division	25	152	0.88	2.29e-11	9606.ENSP00000166345,9606.ENSP00000216911,9606.ENSP00000240423,9606.ENSP00000240488,9606.ENSP00000257934,9606.ENSP00000262643,9606.ENSP00000263181,9606.ENSP00000263753,9606.ENSP00000271452,9606.ENSP00000287598,9606.ENSP00000300093,9606.ENSP00000302530,9606.ENSP00000349961,9606.ENSP00000355167,9606.ENSP00000356379,9606.ENSP00000358813,9606.ENSP00000361043,9606.ENSP00000364976,9606.ENSP00000372088,…	TRIP13,AURKA,NCAPH,MND1,ESPL1,CCNE1,KIF18A,SGOL1,NUF2,BUB1B,PLK1,BUB1,SMC4,HORMAD1,ASPM,TTK,RAD54L,CKS2,RAD51,FANCA,PTTG1,INCENP,TOP2A,CCNE2,MYBL1
GO:0010948	Negative regulation of cell cycle process	35	328	0.69	3.16e-11	9606.ENSP00000166345,9606.ENSP00000209728,9606.ENSP00000216802,9606.ENSP00000216911,9606.ENSP00000256442,9606.ENSP00000257934,9606.ENSP00000287598,9606.ENSP00000296509,9606.ENSP00000300093,9606.ENSP00000301633,9606.ENSP00000302530,9606.ENSP00000312995,9606.ENSP00000313950,9606.ENSP00000320147,9606.ENSP00000320866,9606.ENSP00000321656,9606.ENSP00000323246,9606.ENSP00000345571,9606.ENSP00000347232,…	TRIP13,CDC6,PSME2,AURKA,CCNB1,ESPL1,BUB1B,MAD2L1,PLK1,BIRC5,BUB1,CLSPN,AURKB,EZH2,CALR,CDC25C,E2F7,E2F1,BLM,RRM2,HORMAD1,CENPF,DTL,NEK2,TTK,ORC1,CDC20,PSMB9,PCNA,RAD51,PTTG1,CDK1,CDC7,CDKN2A,E2F8
GO:0051321	Meiotic cell cycle	29	220	0.78	3.63e-11	9606.ENSP00000166345,9606.ENSP00000216911,9606.ENSP00000240423,9606.ENSP00000240488,9606.ENSP00000257934,9606.ENSP00000262643,9606.ENSP00000263181,9606.ENSP00000263753,9606.ENSP00000271452,9606.ENSP00000287598,9606.ENSP00000300093,9606.ENSP00000302530,9606.ENSP00000325017,9606.ENSP00000349961,9606.ENSP00000355167,9606.ENSP00000355506,9606.ENSP00000355966,9606.ENSP00000356379,9606.ENSP00000358813,…	TRIP13,AURKA,NCAPH,MND1,ESPL1,CCNE1,KIF18A,SGOL1,NUF2,BUB1B,PLK1,BUB1,NCAPD2,SMC4,HORMAD1,EXO1,NEK2,ASPM,TTK,RAD54L,CKS2,RAD51,FANCA,PTTG1,INCENP,TOP2A,CCNE2,MYBL1,H2AFX
GO:0000082	G1/S transition of mitotic cell cycle	23	128	0.91	4.27e-11	9606.ENSP00000209728,9606.ENSP00000219097,9606.ENSP00000242208,9606.ENSP00000262105,9606.ENSP00000262643,9606.ENSP00000265056,9606.ENSP00000265728,9606.ENSP00000303706,9606.ENSP00000323246,9606.ENSP00000335357,9606.ENSP00000340691,9606.ENSP00000345571,9606.ENSP00000353770,9606.ENSP00000354451,9606.ENSP00000360623,9606.ENSP00000362937,9606.ENSP00000365692,9606.ENSP00000368458,9606.ENSP00000393139,…	CDC6,ORC6,INHBA,MCM4,CCNE1,MCM2,DBF4,CDC25A,E2F7,CDKN3,EIF4EBP1,E2F1,RRM2,IQGAP3,ORC1,RCC1,PIM2,PCNA,CDC7,CDC45,MCM10,CDKN2A,CCNE2
GO:0002478	Antigen processing and presentation of exogenous peptide antigen	26	174	0.83	5.01e-11	9606.ENSP00000216802,9606.ENSP00000236671,9606.ENSP00000260363,9606.ENSP00000260731,9606.ENSP00000261623,9606.ENSP00000263181,9606.ENSP00000265148,9606.ENSP00000289902,9606.ENSP00000320866,9606.ENSP00000324020,9606.ENSP00000345344,9606.ENSP00000346206,9606.ENSP00000357981,9606.ENSP00000358165,9606.ENSP00000361298,9606.ENSP00000363524,9606.ENSP00000363993,9606.ENSP00000364034,9606.ENSP00000364076,…	PSME2,CTSD,KIF23,KIF11,CYBA,KIF18A,CENPE,FCER1G,CALR,KIF15,CTSL,TAP1,CTSS,FCGR1A,KIF2C,KIF4A,PSMB9,TAP2,HLA-DQA2,HLA-DQB1,CYBB,HLA-DRA,IFI30,HLA-DMB,HLA-B,RACGAP1
GO:0033044	Regulation of chromosome organization	36	359	0.66	7.18e-11	9606.ENSP00000166345,9606.ENSP00000209728,9606.ENSP00000244534,9606.ENSP00000244573,9606.ENSP00000247191,9606.ENSP00000256442,9606.ENSP00000257934,9606.ENSP00000261597,9606.ENSP00000265056,9606.ENSP00000265148,9606.ENSP00000275517,9606.ENSP00000280326,9606.ENSP00000287394,9606.ENSP00000287598,9606.ENSP00000296509,9606.ENSP00000300093,9606.ENSP00000301633,9606.ENSP00000302530,9606.ENSP00000305480,…	TRIP13,CDC6,HIST1H1D,HIST1H1A,DLGAP5,CCNB1,ESPL1,NDC80,MCM2,CENPE,CDCA5,CCT5,ATAD2,BUB1B,MAD2L1,PLK1,BIRC5,BUB1,FEN1,HIST1H1E,AURKB,GEN1,TACC3,PIF1,HIST1H1B,UBE2C,CENPF,NEK2,MKI67,TTK,CDC20,PTTG1,HMGA1,CDC45,TOP2A,DDX11
GO:0006261	DNA-dependent DNA replication	22	119	0.93	8.37e-11	9606.ENSP00000209728,9606.ENSP00000219097,9606.ENSP00000261600,9606.ENSP00000262105,9606.ENSP00000262643,9606.ENSP00000264233,9606.ENSP00000265056,9606.ENSP00000305480,9606.ENSP00000318977,9606.ENSP00000347232,9606.ENSP00000353793,9606.ENSP00000360623,9606.ENSP00000368458,9606.ENSP00000372088,9606.ENSP00000386239,9606.ENSP00000399888,9606.ENSP00000405726,9606.ENSP00000418268,9606.ENSP00000429089,…	CDC6,ORC6,THOC1,MCM4,CCNE1,POLQ,MCM2,FEN1,GEN1,BLM,WDHD1,ORC1,PCNA,RAD51,TONSL,HMGA1,CDC45,MCM10,CCNE2,DDX11,TIMELESS,RECQL4
GO:0050794	Regulation of cellular process	313	10932	0.12	8.73e-11	9606.ENSP00000166345,9606.ENSP00000209728,9606.ENSP00000215743,9606.ENSP00000216117,9606.ENSP00000216341,9606.ENSP00000216802,9606.ENSP00000216911,9606.ENSP00000217026,9606.ENSP00000219097,9606.ENSP00000219150,9606.ENSP00000225655,9606.ENSP00000226279,9606.ENSP00000228843,9606.ENSP00000229239,9606.ENSP00000231009,9606.ENSP00000233143,9606.ENSP00000233893,9606.ENSP00000236671,9606.ENSP00000240285,…	TRIP13,CDC6,MMP11,HMOX1,GZMB,PSME2,AURKA,MYBL2,ORC6,CORO1A,PFN1,CD38,RAD51AP1,GAPDH,GZMK,TMSB10,HSPE1,CTSD,RDH10,INHBA,HIST1H1D,HIST1H1A,DLGAP5,WISP1,ADAMDEC1,CCNB1,OASL,ESPL1,KIF23,KIF11,LMNB1,NDC80,THOC1,CYBA,PKMYT1,COTL1,TYROBP,CCNE1,PRDX1,KIF18A,EPCAM,CAPG,CYTIP,POLQ,CD80,UBE2S,ICAM1,MCM2,CENPE,PITX1,TFEC,GAL,DBF4,ANLN,SQLE,ARNTL2,BCL2A1,PLK4,CD53,S100A11,CCNA2,GZMA,PLA2G7,NFKBIE,GGCT,CDCA5,P…
GO:0007017	Microtubule-based process	52	727	0.51	8.93e-11	9606.ENSP00000216911,9606.ENSP00000217026,9606.ENSP00000229239,9606.ENSP00000247191,9606.ENSP00000256442,9606.ENSP00000257934,9606.ENSP00000260363,9606.ENSP00000260731,9606.ENSP00000261597,9606.ENSP00000263181,9606.ENSP00000263753,9606.ENSP00000265148,9606.ENSP00000270861,9606.ENSP00000271452,9606.ENSP00000284440,9606.ENSP00000296484,9606.ENSP00000296509,9606.ENSP00000300035,9606.ENSP00000300093,…	AURKA,MYBL2,GAPDH,DLGAP5,CCNB1,ESPL1,KIF23,KIF11,NDC80,KIF18A,SGOL1,CENPE,PLK4,NUF2,UCHL1,POC1A,MAD2L1,KIAA0101,PLK1,TPX2,TUBA1C,BIRC5,AURKB,SPAG5,KIF15,TACC3,CENPA,NEK2,KIF14,ASPM,CENPW,TTK,PSRC1,STIL,KIF2C,CDC20,RCC1,KIF4A,CALML5,PRC1,INCENP,KIF20A,CDK1,WDR62,SAPCD2,KIFC1,RACGAP1,STMN1,GAS2L3,ENSG00000258947,NUSAP1,KIF18B
GO:0045786	Negative regulation of cell cycle	45	571	0.56	1.77e-10	9606.ENSP00000166345,9606.ENSP00000209728,9606.ENSP00000216802,9606.ENSP00000216911,9606.ENSP00000242208,9606.ENSP00000256442,9606.ENSP00000257934,9606.ENSP00000287598,9606.ENSP00000296509,9606.ENSP00000300093,9606.ENSP00000301633,9606.ENSP00000302530,9606.ENSP00000306512,9606.ENSP00000312995,9606.ENSP00000313950,9606.ENSP00000320147,9606.ENSP00000320866,9606.ENSP00000321656,9606.ENSP00000322568,…	TRIP13,CDC6,PSME2,AURKA,INHBA,CCNB1,ESPL1,BUB1B,MAD2L1,PLK1,BIRC5,BUB1,CXCL8,CLSPN,AURKB,EZH2,CALR,CDC25C,SOX11,E2F7,CDKN3,E2F1,BLM,RRM2,HORMAD1,CENPF,DTL,NEK2,LAMTOR2,TTK,ORC1,CDC20,ZWINT,PSMB9,PCNA,RAD51,PTTG1,CDK1,CDC7,CDC45,TOP2A,CDKN2A,H2AFX,TIMELESS,E2F8
GO:0098542	Defense response to other organism	58	900	0.47	2.01e-10	9606.ENSP00000216341,9606.ENSP00000219150,9606.ENSP00000229239,9606.ENSP00000257570,9606.ENSP00000261267,9606.ENSP00000261623,9606.ENSP00000262428,9606.ENSP00000262629,9606.ENSP00000262746,9606.ENSP00000264832,9606.ENSP00000276708,9606.ENSP00000286758,9606.ENSP00000289707,9606.ENSP00000289902,9606.ENSP00000296503,9606.ENSP00000301653,9606.ENSP00000302569,9606.ENSP00000305651,9606.ENSP00000306565,…	GZMB,CORO1A,GAPDH,OASL,LYZ,CYBA,COTL1,TYROBP,PRDX1,ICAM1,GSDMC,CXCL13,SLAMF8,FCER1G,HMGB2,KRT16,CLEC7A,CXCL10,ISG20,PPP1R14B,TRIM59,C1QB,MARCO,HIST1H2BC,PMAIP1,APOBEC3B,SHMT2,OAS2,IFI6,HIST1H2BK,CCL20,STAT1,CXCL9,SLAMF7,S100A7,S100A8,S100A9,HIST2H2BE,FCGR1A,IRAK1,HMGB3,GBP5,IFI44L,SRPK1,C1QA,HLA-DQA2,HLA-DQB1,UBD,CYBB,ISG15,RSAD2,HLA-DRA,IFI30,HLA-B,PTPRC,CLEC5A,ACP5,HIST1H2BJ
GO:0007093	Mitotic cell cycle checkpoint	24	156	0.85	2.21e-10	9606.ENSP00000166345,9606.ENSP00000209728,9606.ENSP00000216911,9606.ENSP00000256442,9606.ENSP00000287598,9606.ENSP00000296509,9606.ENSP00000300093,9606.ENSP00000301633,9606.ENSP00000302530,9606.ENSP00000312995,9606.ENSP00000313950,9606.ENSP00000321656,9606.ENSP00000323246,9606.ENSP00000345571,9606.ENSP00000347232,9606.ENSP00000355922,9606.ENSP00000358813,9606.ENSP00000360623,9606.ENSP00000361540,…	TRIP13,CDC6,AURKA,CCNB1,BUB1B,MAD2L1,PLK1,BIRC5,BUB1,CLSPN,AURKB,CDC25C,E2F7,E2F1,BLM,CENPF,TTK,ORC1,CDC20,ZWINT,PCNA,CDK1,TOP2A,E2F8
GO:0048519	Negative regulation of biological process	187	5389	0.2	3.31e-10	9606.ENSP00000166345,9606.ENSP00000209728,9606.ENSP00000215743,9606.ENSP00000216117,9606.ENSP00000216341,9606.ENSP00000216802,9606.ENSP00000216911,9606.ENSP00000219097,9606.ENSP00000219150,9606.ENSP00000225655,9606.ENSP00000226279,9606.ENSP00000229239,9606.ENSP00000231009,9606.ENSP00000233143,9606.ENSP00000242208,9606.ENSP00000244534,9606.ENSP00000244573,9606.ENSP00000250092,9606.ENSP00000250160,…	TRIP13,CDC6,MMP11,HMOX1,GZMB,PSME2,AURKA,ORC6,CORO1A,PFN1,CD38,GAPDH,GZMK,TMSB10,INHBA,HIST1H1D,HIST1H1A,CD68,WISP1,ADAMDEC1,CCNB1,OASL,ESPL1,ORM1,THOC1,CYBA,PKMYT1,TYROBP,CCNE1,EPCAM,CAPG,POLQ,CD80,ICAM1,MCM2,PITX1,TFEC,GAL,BCL2A1,S100A11,GZMA,NFKBIE,UCHL1,SAMSN1,CXCL13,ATAD2,BUB1B,SLAMF8,FCER1G,CSTB,CCR5,EN1,H2AFZ,HMGB2,MAD2L1,PLK1,TPX2,BIRC5,KRT16,BUB1,CTLA4,CXCL10,CST1,CXCL8,MRPL13,ISG20,HIST…
GO:0006974	Cellular response to dna damage stimulus	53	793	0.48	5.59e-10	9606.ENSP00000166345,9606.ENSP00000216117,9606.ENSP00000216911,9606.ENSP00000221486,9606.ENSP00000228843,9606.ENSP00000256442,9606.ENSP00000262105,9606.ENSP00000264233,9606.ENSP00000264596,9606.ENSP00000265056,9606.ENSP00000267953,9606.ENSP00000275517,9606.ENSP00000296503,9606.ENSP00000300035,9606.ENSP00000300093,9606.ENSP00000303939,9606.ENSP00000305480,9606.ENSP00000310842,9606.ENSP00000312995,…	TRIP13,HMOX1,AURKA,RNASEH2A,RAD51AP1,CCNB1,MCM4,POLQ,NEIL3,MCM2,BCL2A1,CDCA5,HMGB2,KIAA0101,PLK1,CTLA4,FEN1,FANCI,CLSPN,GEN1,CDC25C,E2F7,PMAIP1,PIF1,FOXM1,E2F1,HIST1H4J,BLM,WDHD1,EXO1,HIST3H2A,DTL,UBE2T,RAD54L,HIST1H4H,HIST1H4C,PCNA,ISG15,RAD51,FANCA,PTTG1,CDK1,TONSL,CDC7,HMGA1,CDC45,TOP2A,MCM10,H2AFX,DDX11,TIMELESS,E2F8,RECQL4
GO:0050789	Regulation of biological process	321	11475	0.11	6.31e-10	9606.ENSP00000166345,9606.ENSP00000209728,9606.ENSP00000215743,9606.ENSP00000216117,9606.ENSP00000216341,9606.ENSP00000216802,9606.ENSP00000216911,9606.ENSP00000217026,9606.ENSP00000219097,9606.ENSP00000219150,9606.ENSP00000225655,9606.ENSP00000226279,9606.ENSP00000228843,9606.ENSP00000229239,9606.ENSP00000231009,9606.ENSP00000233143,9606.ENSP00000233893,9606.ENSP00000236147,9606.ENSP00000236671,…	TRIP13,CDC6,MMP11,HMOX1,GZMB,PSME2,AURKA,MYBL2,ORC6,CORO1A,PFN1,CD38,RAD51AP1,GAPDH,GZMK,TMSB10,HSPE1,SELL,CTSD,RDH10,INHBA,HIST1H1D,HIST1H1A,DLGAP5,CD68,WISP1,ADAMDEC1,CCNB1,OASL,ESPL1,ORM1,KIF23,KIF11,LMNB1,NDC80,THOC1,CYBA,PKMYT1,COTL1,TYROBP,CCNE1,PRDX1,KIF18A,EPCAM,CAPG,CYTIP,POLQ,CD80,UBE2S,ICAM1,MCM2,CENPE,PITX1,TFEC,GAL,DBF4,ANLN,SQLE,ARNTL2,BCL2A1,PLK4,CD53,S100A11,CCNA2,GZMA,PLA2G7,NFKB…
GO:0048523	Negative regulation of cellular process	173	4874	0.21	6.77e-10	9606.ENSP00000166345,9606.ENSP00000209728,9606.ENSP00000215743,9606.ENSP00000216117,9606.ENSP00000216341,9606.ENSP00000216802,9606.ENSP00000216911,9606.ENSP00000219097,9606.ENSP00000219150,9606.ENSP00000225655,9606.ENSP00000226279,9606.ENSP00000229239,9606.ENSP00000233143,9606.ENSP00000242208,9606.ENSP00000244534,9606.ENSP00000244573,9606.ENSP00000250160,9606.ENSP00000256412,9606.ENSP00000256442,…	TRIP13,CDC6,MMP11,HMOX1,GZMB,PSME2,AURKA,ORC6,CORO1A,PFN1,CD38,GAPDH,TMSB10,INHBA,HIST1H1D,HIST1H1A,WISP1,ADAMDEC1,CCNB1,ESPL1,THOC1,PKMYT1,TYROBP,CCNE1,EPCAM,CAPG,POLQ,CD80,ICAM1,MCM2,PITX1,TFEC,GAL,BCL2A1,S100A11,GZMA,UCHL1,SAMSN1,CXCL13,ATAD2,BUB1B,SLAMF8,FCER1G,CSTB,CCR5,EN1,H2AFZ,HMGB2,MAD2L1,PLK1,TPX2,BIRC5,KRT16,BUB1,CTLA4,CXCL10,CST1,CXCL8,MRPL13,HIST1H1E,CBX2,PPP1R14B,TRIM59,CLSPN,AURKB,…
GO:0043933	Protein-containing complex subunit organization	79	1539	0.37	6.9e-10	9606.ENSP00000229238,9606.ENSP00000244534,9606.ENSP00000244573,9606.ENSP00000256442,9606.ENSP00000260102,9606.ENSP00000261623,9606.ENSP00000262105,9606.ENSP00000263181,9606.ENSP00000263382,9606.ENSP00000263867,9606.ENSP00000264233,9606.ENSP00000264552,9606.ENSP00000265056,9606.ENSP00000265148,9606.ENSP00000265748,9606.ENSP00000272348,9606.ENSP00000274793,9606.ENSP00000281453,9606.ENSP00000289316,…	MRPL51,HIST1H1D,HIST1H1A,CCNB1,MRPL15,CYBA,MCM4,KIF18A,ASF1B,CAPG,POLQ,UBE2S,MCM2,CENPE,ANLN,SNRPG,PLA2G7,CENPU,HIST1H2BD,HMGB2,TPX2,TK1,MRPL13,HIST1H1E,CALR,HIST1H2BC,HIST1H1B,HIST2H3D,SHMT2,CASC5,CENPA,C20orf24,FN1,HIST1H4J,BLM,UBE2C,HIST1H2BK,HIST1H3J,RRM2,COA6,HIST3H2A,CENPF,CENPW,HIST2H2BE,HIST2H3C,GBP5,KIF2C,SRPK1,HIST1H2BL,HIST1H4H,HIST1H3D,HIST1H4C,RAD51,FANCA,CENPN,HELLS,CDK1,HLA-DRA,DIA…
GO:0097549	Chromatin organization involved in negative regulation of transcription	20	108	0.93	8.28e-10	9606.ENSP00000296417,9606.ENSP00000320147,9606.ENSP00000332790,9606.ENSP00000333277,9606.ENSP00000341094,9606.ENSP00000347168,9606.ENSP00000351589,9606.ENSP00000352119,9606.ENSP00000352252,9606.ENSP00000355656,9606.ENSP00000358154,9606.ENSP00000358155,9606.ENSP00000366956,9606.ENSP00000366999,9606.ENSP00000367034,9606.ENSP00000377601,9606.ENSP00000385479,9606.ENSP00000399888,9606.ENSP00000418915,…	H2AFZ,EZH2,HIST2H2AB,HIST2H3D,HIST1H2AD,HIST1H4J,HIST1H2AI,HIST1H2AG,HIST1H3J,HIST3H2A,HIST2H3C,HIST2H2AA,HIST1H4H,HIST1H3D,HIST1H4C,HELLS,HIST2H3A,HMGA1,CDKN2A,H2AFX
GO:0019882	Antigen processing and presentation	27	219	0.75	8.35e-10	9606.ENSP00000216802,9606.ENSP00000236671,9606.ENSP00000260363,9606.ENSP00000260731,9606.ENSP00000261623,9606.ENSP00000263181,9606.ENSP00000264832,9606.ENSP00000265148,9606.ENSP00000289902,9606.ENSP00000320866,9606.ENSP00000324020,9606.ENSP00000345344,9606.ENSP00000346206,9606.ENSP00000357981,9606.ENSP00000358165,9606.ENSP00000361298,9606.ENSP00000363524,9606.ENSP00000363993,9606.ENSP00000364034,…	PSME2,CTSD,KIF23,KIF11,CYBA,KIF18A,ICAM1,CENPE,FCER1G,CALR,KIF15,CTSL,TAP1,CTSS,FCGR1A,KIF2C,KIF4A,PSMB9,TAP2,HLA-DQA2,HLA-DQB1,CYBB,HLA-DRA,IFI30,HLA-DMB,HLA-B,RACGAP1
GO:0030261	Chromosome condensation	14	42	1.18	1.87e-09	9606.ENSP00000240423,9606.ENSP00000244534,9606.ENSP00000244573,9606.ENSP00000251496,9606.ENSP00000256442,9606.ENSP00000275517,9606.ENSP00000307705,9606.ENSP00000325017,9606.ENSP00000330074,9606.ENSP00000349961,9606.ENSP00000378295,9606.ENSP00000378699,9606.ENSP00000411532,9606.ENSP00000453403	NCAPH,HIST1H1D,HIST1H1A,NCAPG,CCNB1,CDCA5,HIST1H1E,NCAPD2,HIST1H1B,SMC4,INCENP,CDK1,TOP2A,NUSAP1
GO:0002252	Immune effector process	58	969	0.44	2.97e-09	9606.ENSP00000216341,9606.ENSP00000219150,9606.ENSP00000236147,9606.ENSP00000236671,9606.ENSP00000250092,9606.ENSP00000257570,9606.ENSP00000259396,9606.ENSP00000260118,9606.ENSP00000261267,9606.ENSP00000261623,9606.ENSP00000262428,9606.ENSP00000262629,9606.ENSP00000262746,9606.ENSP00000264832,9606.ENSP00000271324,9606.ENSP00000271638,9606.ENSP00000289902,9606.ENSP00000291568,9606.ENSP00000296370,…	GZMB,CORO1A,SELL,CTSD,CD68,OASL,ORM1,GGH,LYZ,CYBA,COTL1,TYROBP,PRDX1,ICAM1,CD53,S100A11,FCER1G,CSTB,S100P,CXCL10,ISG20,C1QB,PMAIP1,APOBEC3B,PLAUR,OAS2,IFI6,CTSB,STAT1,PNP,CXCL9,ILF2,EXO1,FCGR3A,SLAMF7,LAMTOR2,S100A7,S100A8,S100A9,CTSS,FCGR1A,IFI44L,MMP9,PLAU,C1QA,HLA-DQB1,CYBB,PRDX4,ISG15,CALML5,RSAD2,PPAPDC1A,LCP1,TSTA3,HLA-B,PTPRC,CLEC5A,ADAM8
GO:0048518	Positive regulation of biological process	201	6112	0.18	3.54e-09	9606.ENSP00000209728,9606.ENSP00000216117,9606.ENSP00000216341,9606.ENSP00000216802,9606.ENSP00000216911,9606.ENSP00000217026,9606.ENSP00000219150,9606.ENSP00000225655,9606.ENSP00000226279,9606.ENSP00000229239,9606.ENSP00000231009,9606.ENSP00000233893,9606.ENSP00000236671,9606.ENSP00000240285,9606.ENSP00000242208,9606.ENSP00000244534,9606.ENSP00000244573,9606.ENSP00000247191,9606.ENSP00000250160,…	CDC6,HMOX1,GZMB,PSME2,AURKA,MYBL2,CORO1A,PFN1,CD38,GAPDH,GZMK,HSPE1,CTSD,RDH10,INHBA,HIST1H1D,HIST1H1A,DLGAP5,WISP1,CCNB1,ESPL1,ORM1,KIF23,NDC80,THOC1,CYBA,TYROBP,CCNE1,EPCAM,CD80,UBE2S,ICAM1,CENPE,PITX1,TFEC,GAL,DBF4,ANLN,ARNTL2,PLK4,CD53,S100A11,CCNA2,GZMA,PLA2G7,CDCA5,CCT5,CXCL13,ATAD2,FCER1G,EN1,KIAA1524,H2AFZ,POC1A,HMGB2,MAD2L1,MELK,PLK1,TPX2,CD3D,BIRC5,CLEC7A,LRP8,CDC25A,CTLA4,FEN1,CXCL10,C…
GO:1901988	Negative regulation of cell cycle phase transition	27	235	0.72	3.54e-09	9606.ENSP00000166345,9606.ENSP00000209728,9606.ENSP00000216802,9606.ENSP00000216911,9606.ENSP00000256442,9606.ENSP00000287598,9606.ENSP00000296509,9606.ENSP00000300093,9606.ENSP00000301633,9606.ENSP00000302530,9606.ENSP00000312995,9606.ENSP00000313950,9606.ENSP00000320147,9606.ENSP00000321656,9606.ENSP00000323246,9606.ENSP00000345571,9606.ENSP00000347232,9606.ENSP00000355922,9606.ENSP00000355958,…	TRIP13,CDC6,PSME2,AURKA,CCNB1,BUB1B,MAD2L1,PLK1,BIRC5,BUB1,CLSPN,AURKB,EZH2,CDC25C,E2F7,E2F1,BLM,CENPF,DTL,TTK,ORC1,CDC20,PSMB9,PCNA,CDK1,CDKN2A,E2F8
GO:1901991	Negative regulation of mitotic cell cycle phase transition	26	219	0.73	4.27e-09	9606.ENSP00000166345,9606.ENSP00000209728,9606.ENSP00000216802,9606.ENSP00000216911,9606.ENSP00000256442,9606.ENSP00000287598,9606.ENSP00000296509,9606.ENSP00000300093,9606.ENSP00000301633,9606.ENSP00000302530,9606.ENSP00000312995,9606.ENSP00000313950,9606.ENSP00000320147,9606.ENSP00000321656,9606.ENSP00000323246,9606.ENSP00000345571,9606.ENSP00000347232,9606.ENSP00000355922,9606.ENSP00000358813,…	TRIP13,CDC6,PSME2,AURKA,CCNB1,BUB1B,MAD2L1,PLK1,BIRC5,BUB1,CLSPN,AURKB,EZH2,CDC25C,E2F7,E2F1,BLM,CENPF,TTK,ORC1,CDC20,PSMB9,PCNA,CDK1,CDKN2A,E2F8
GO:2001251	Negative regulation of chromosome organization	21	137	0.84	5.34e-09	9606.ENSP00000166345,9606.ENSP00000244534,9606.ENSP00000244573,9606.ENSP00000257934,9606.ENSP00000265056,9606.ENSP00000287394,9606.ENSP00000287598,9606.ENSP00000296509,9606.ENSP00000300093,9606.ENSP00000301633,9606.ENSP00000302530,9606.ENSP00000307705,9606.ENSP00000313950,9606.ENSP00000328174,9606.ENSP00000330074,9606.ENSP00000355922,9606.ENSP00000358813,9606.ENSP00000361540,9606.ENSP00000377536,…	TRIP13,HIST1H1D,HIST1H1A,ESPL1,MCM2,ATAD2,BUB1B,MAD2L1,PLK1,BIRC5,BUB1,HIST1H1E,AURKB,PIF1,HIST1H1B,CENPF,TTK,CDC20,PTTG1,HMGA1,TOP2A
GO:0006281	DNA repair	40	522	0.54	6.45e-09	9606.ENSP00000166345,9606.ENSP00000221486,9606.ENSP00000228843,9606.ENSP00000262105,9606.ENSP00000264233,9606.ENSP00000264596,9606.ENSP00000265056,9606.ENSP00000275517,9606.ENSP00000296503,9606.ENSP00000300035,9606.ENSP00000305480,9606.ENSP00000310842,9606.ENSP00000312995,9606.ENSP00000318977,9606.ENSP00000328174,9606.ENSP00000342307,9606.ENSP00000347168,9606.ENSP00000347232,9606.ENSP00000353793,…	TRIP13,RNASEH2A,RAD51AP1,MCM4,POLQ,NEIL3,MCM2,CDCA5,HMGB2,KIAA0101,FEN1,FANCI,CLSPN,GEN1,PIF1,FOXM1,HIST1H4J,BLM,WDHD1,EXO1,HIST3H2A,DTL,UBE2T,RAD54L,HIST1H4H,HIST1H4C,PCNA,ISG15,RAD51,FANCA,PTTG1,CDK1,TONSL,CDC7,HMGA1,CDC45,H2AFX,DDX11,TIMELESS,RECQL4
GO:0000281	Mitotic cytokinesis	16	70	1.02	7.04e-09	9606.ENSP00000257934,9606.ENSP00000260363,9606.ENSP00000265748,9606.ENSP00000300093,9606.ENSP00000301633,9606.ENSP00000336868,9606.ENSP00000360540,9606.ENSP00000363524,9606.ENSP00000367276,9606.ENSP00000376306,9606.ENSP00000377793,9606.ENSP00000378295,9606.ENSP00000378356,9606.ENSP00000404190,9606.ENSP00000410452,9606.ENSP00000453403	ESPL1,KIF23,ANLN,PLK1,BIRC5,CENPA,CEP55,KIF4A,CKAP2,CIT,PRC1,INCENP,KIF20A,RACGAP1,STMN1,NUSAP1
GO:0045087	Innate immune response	47	703	0.48	9.03e-09	9606.ENSP00000216341,9606.ENSP00000219150,9606.ENSP00000229239,9606.ENSP00000257570,9606.ENSP00000261623,9606.ENSP00000262629,9606.ENSP00000262746,9606.ENSP00000264832,9606.ENSP00000289902,9606.ENSP00000296503,9606.ENSP00000301653,9606.ENSP00000302569,9606.ENSP00000306565,9606.ENSP00000310117,9606.ENSP00000311219,9606.ENSP00000313967,9606.ENSP00000318916,9606.ENSP00000321744,9606.ENSP00000327459,…	GZMB,CORO1A,GAPDH,OASL,CYBA,TYROBP,PRDX1,ICAM1,FCER1G,HMGB2,KRT16,CLEC7A,ISG20,PPP1R14B,TRIM59,C1QB,MARCO,HIST1H2BC,APOBEC3B,SHMT2,OAS2,IFI6,HIST1H2BK,CCL20,STAT1,SLAMF7,S100A7,S100A8,S100A9,HIST2H2BE,FCGR1A,IRAK1,HMGB3,GBP5,SRPK1,C1QA,HLA-DQA2,HLA-DQB1,UBD,CYBB,ISG15,RSAD2,HLA-DRA,IFI30,HLA-B,CLEC5A,HIST1H2BJ
GO:0019221	Cytokine-mediated signaling pathway	46	678	0.49	9.23e-09	9606.ENSP00000216117,9606.ENSP00000216802,9606.ENSP00000257570,9606.ENSP00000261366,9606.ENSP00000264246,9606.ENSP00000264832,9606.ENSP00000286758,9606.ENSP00000289902,9606.ENSP00000292303,9606.ENSP00000301633,9606.ENSP00000303634,9606.ENSP00000305651,9606.ENSP00000306512,9606.ENSP00000306565,9606.ENSP00000306752,9606.ENSP00000306884,9606.ENSP00000322788,9606.ENSP00000331127,9606.ENSP00000332049,…	HMOX1,PSME2,OASL,LMNB1,CD80,ICAM1,CXCL13,FCER1G,CCR5,BIRC5,LRP8,CXCL10,CXCL8,ISG20,BOLA2B,CXCL11,MMP1,BOLA2,CD86,HIST2H3D,OAS2,IFI6,FN1,CCL20,HIST1H3J,STAT1,CXCL9,HIST2H3C,FCGR1A,IRAK1,MMP9,PSMB9,HLA-DQA2,HLA-DQB1,HIST1H3D,ISG15,SDC1,RSAD2,HLA-DRA,LCP1,IFI30,HIST2H3A,CXCR4,HLA-B,LTB,IL32
GO:0065003	Protein-containing complex assembly	68	1293	0.38	9.26e-09	9606.ENSP00000244534,9606.ENSP00000244573,9606.ENSP00000256442,9606.ENSP00000261623,9606.ENSP00000262105,9606.ENSP00000263382,9606.ENSP00000263867,9606.ENSP00000264233,9606.ENSP00000264552,9606.ENSP00000265056,9606.ENSP00000265148,9606.ENSP00000265748,9606.ENSP00000272348,9606.ENSP00000281453,9606.ENSP00000289316,9606.ENSP00000296503,9606.ENSP00000300403,9606.ENSP00000301634,9606.ENSP00000307705,…	HIST1H1D,HIST1H1A,CCNB1,CYBA,MCM4,ASF1B,CAPG,POLQ,UBE2S,MCM2,CENPE,ANLN,SNRPG,CENPU,HIST1H2BD,HMGB2,TPX2,TK1,HIST1H1E,CALR,HIST1H2BC,HIST1H1B,HIST2H3D,SHMT2,CASC5,CENPA,C20orf24,FN1,HIST1H4J,BLM,UBE2C,HIST1H2BK,HIST1H3J,RRM2,COA6,CENPF,CENPW,HIST2H2BE,HIST2H3C,GBP5,SRPK1,HIST1H2BL,HIST1H4H,HIST1H3D,HIST1H4C,RAD51,FANCA,CENPN,HELLS,CDK1,HLA-DRA,DIAPH3,HIST2H3A,HLA-DMB,HMGA1,CDC45,HJURP,MS4A1,H2AFX…
GO:0051303	Establishment of chromosome localization	16	73	1	1.16e-08	9606.ENSP00000247191,9606.ENSP00000256442,9606.ENSP00000261597,9606.ENSP00000263181,9606.ENSP00000265148,9606.ENSP00000271452,9606.ENSP00000275517,9606.ENSP00000301633,9606.ENSP00000355922,9606.ENSP00000356319,9606.ENSP00000358925,9606.ENSP00000361298,9606.ENSP00000362146,9606.ENSP00000378295,9606.ENSP00000393963,9606.ENSP00000481110	DLGAP5,CCNB1,NDC80,KIF18A,CENPE,NUF2,CDCA5,BIRC5,CENPF,KIF14,PSRC1,KIF2C,CDCA8,INCENP,KIFC1,FAM83D
GO:0034622	Cellular protein-containing complex assembly	51	816	0.45	1.2e-08	9606.ENSP00000244534,9606.ENSP00000244573,9606.ENSP00000261623,9606.ENSP00000262105,9606.ENSP00000263382,9606.ENSP00000264552,9606.ENSP00000265056,9606.ENSP00000265148,9606.ENSP00000265748,9606.ENSP00000272348,9606.ENSP00000281453,9606.ENSP00000289316,9606.ENSP00000296503,9606.ENSP00000300403,9606.ENSP00000307705,9606.ENSP00000320866,9606.ENSP00000321744,9606.ENSP00000330074,9606.ENSP00000333277,…	HIST1H1D,HIST1H1A,CYBA,MCM4,ASF1B,UBE2S,MCM2,CENPE,ANLN,SNRPG,CENPU,HIST1H2BD,HMGB2,TPX2,HIST1H1E,CALR,HIST1H2BC,HIST1H1B,HIST2H3D,CASC5,CENPA,C20orf24,HIST1H4J,UBE2C,HIST1H2BK,HIST1H3J,COA6,CENPF,CENPW,HIST2H2BE,HIST2H3C,SRPK1,HIST1H2BL,HIST1H4H,HIST1H3D,HIST1H4C,RAD51,CENPN,HELLS,HLA-DRA,DIAPH3,HIST2H3A,HLA-DMB,CDC45,HJURP,H2AFX,HIST2H2BF,LSM4,HIST1H2BJ,HIST3H2BB,HIST1H2BN
GO:0033046	Negative regulation of sister chromatid segregation	12	32	1.23	1.61e-08	9606.ENSP00000166345,9606.ENSP00000257934,9606.ENSP00000287598,9606.ENSP00000296509,9606.ENSP00000300093,9606.ENSP00000301633,9606.ENSP00000302530,9606.ENSP00000313950,9606.ENSP00000355922,9606.ENSP00000358813,9606.ENSP00000361540,9606.ENSP00000377536	TRIP13,ESPL1,BUB1B,MAD2L1,PLK1,BIRC5,BUB1,AURKB,CENPF,TTK,CDC20,PTTG1
GO:0051225	Spindle assembly	17	88	0.95	1.61e-08	9606.ENSP00000216911,9606.ENSP00000217026,9606.ENSP00000260363,9606.ENSP00000260731,9606.ENSP00000300403,9606.ENSP00000301633,9606.ENSP00000313950,9606.ENSP00000355966,9606.ENSP00000356379,9606.ENSP00000357308,9606.ENSP00000361540,9606.ENSP00000362937,9606.ENSP00000363524,9606.ENSP00000377793,9606.ENSP00000378295,9606.ENSP00000393963,9606.ENSP00000404190	AURKA,MYBL2,KIF23,KIF11,TPX2,BIRC5,AURKB,NEK2,ASPM,CENPW,CDC20,RCC1,KIF4A,PRC1,INCENP,KIFC1,RACGAP1
GO:0033554	Cellular response to stress	81	1725	0.33	1.99e-08	9606.ENSP00000166345,9606.ENSP00000216117,9606.ENSP00000216802,9606.ENSP00000216911,9606.ENSP00000221486,9606.ENSP00000228843,9606.ENSP00000256442,9606.ENSP00000261623,9606.ENSP00000262105,9606.ENSP00000262746,9606.ENSP00000264233,9606.ENSP00000264596,9606.ENSP00000264832,9606.ENSP00000265056,9606.ENSP00000265440,9606.ENSP00000267953,9606.ENSP00000274026,9606.ENSP00000275517,9606.ENSP00000286091,…	TRIP13,HMOX1,PSME2,AURKA,RNASEH2A,RAD51AP1,CCNB1,CYBA,MCM4,PRDX1,POLQ,NEIL3,ICAM1,MCM2,TFEC,BCL2A1,CCNA2,CDCA5,PDIA4,HMGB2,MELK,KIAA0101,PLK1,CTLA4,FEN1,CXCL10,CXCL8,FANCI,CLSPN,GEN1,EZH2,CALR,CDC25C,DCTPP1,E2F7,PMAIP1,PIF1,EIF4EBP1,FOXM1,E2F1,SUV39H2,HIST1H4J,BLM,WDHD1,EXO1,HIST3H2A,DTL,UBE2T,HDGF,IRAK1,RAD54L,MMP9,PGK1,PSMB9,HIST1H4H,HIST1H4C,CYBB,PCNA,ISG15,RAD51,GJB2,FANCA,PTTG1,MST4,CDK1,CBS…
GO:0022607	Cellular component assembly	100	2359	0.29	2.09e-08	9606.ENSP00000166345,9606.ENSP00000216911,9606.ENSP00000217026,9606.ENSP00000219150,9606.ENSP00000244534,9606.ENSP00000244573,9606.ENSP00000256442,9606.ENSP00000260363,9606.ENSP00000260731,9606.ENSP00000261623,9606.ENSP00000262105,9606.ENSP00000263382,9606.ENSP00000263867,9606.ENSP00000264233,9606.ENSP00000264552,9606.ENSP00000265056,9606.ENSP00000265148,9606.ENSP00000265748,9606.ENSP00000265896,…	TRIP13,AURKA,MYBL2,CORO1A,HIST1H1D,HIST1H1A,CCNB1,KIF23,KIF11,CYBA,MCM4,ASF1B,CAPG,POLQ,UBE2S,MCM2,CENPE,ANLN,SQLE,PLK4,SNRPG,CENPU,HIST1H2BD,POC1A,HMGB2,PLK1,TPX2,BIRC5,TK1,BOLA2B,HIST1H1E,AURKB,CALR,HIST1H2BC,HIST1H1B,BOLA2,HIST2H3D,SHMT2,CDKN3,CASC5,CENPA,C20orf24,FN1,HIST1H4J,BLM,UBE2C,HIST1H2BK,HIST1H3J,RRM2,HORMAD1,EXO1,COA6,CENPF,NEK2,ASPM,CENPW,HIST2H2BE,HIST2H3C,GBP5,CDC20,SRPK1,RCC1,KIF…
GO:0051128	Regulation of cellular component organization	101	2402	0.28	2.49e-08	9606.ENSP00000166345,9606.ENSP00000209728,9606.ENSP00000216341,9606.ENSP00000216911,9606.ENSP00000219150,9606.ENSP00000225655,9606.ENSP00000226279,9606.ENSP00000233143,9606.ENSP00000242208,9606.ENSP00000244534,9606.ENSP00000244573,9606.ENSP00000247191,9606.ENSP00000256442,9606.ENSP00000257934,9606.ENSP00000260731,9606.ENSP00000261597,9606.ENSP00000261623,9606.ENSP00000262300,9606.ENSP00000262428,…	TRIP13,CDC6,GZMB,AURKA,CORO1A,PFN1,CD38,TMSB10,INHBA,HIST1H1D,HIST1H1A,DLGAP5,CCNB1,ESPL1,KIF11,NDC80,CYBA,PKMYT1,COTL1,TYROBP,KIF18A,CAPG,ICAM1,MCM2,CENPE,ANLN,PLK4,CD53,CDCA5,CCT5,CXCL13,ATAD2,BUB1B,POC1A,MAD2L1,PLK1,TPX2,BIRC5,BUB1,CLEC7A,LRP8,FEN1,CXCL10,HIST1H1E,AURKB,GEN1,SKA3,EZH2,CALR,CDC25C,MMP1,SPAG5,PMAIP1,TACC3,PIF1,HIST1H1B,NME1,PLAUR,EIF4EBP1,FOXM1,E2F1,FN1,UBE2C,IQGAP3,CXCL9,HORMAD…
GO:0051310	Metaphase plate congression	14	54	1.07	2.51e-08	9606.ENSP00000256442,9606.ENSP00000261597,9606.ENSP00000263181,9606.ENSP00000265148,9606.ENSP00000271452,9606.ENSP00000275517,9606.ENSP00000355922,9606.ENSP00000356319,9606.ENSP00000358925,9606.ENSP00000361298,9606.ENSP00000362146,9606.ENSP00000378295,9606.ENSP00000393963,9606.ENSP00000481110	CCNB1,NDC80,KIF18A,CENPE,NUF2,CDCA5,CENPF,KIF14,PSRC1,KIF2C,CDCA8,INCENP,KIFC1,FAM83D
GO:0065007	Biological regulation	329	12171	0.09	2.68e-08	9606.ENSP00000166345,9606.ENSP00000209728,9606.ENSP00000215743,9606.ENSP00000216117,9606.ENSP00000216341,9606.ENSP00000216802,9606.ENSP00000216911,9606.ENSP00000217026,9606.ENSP00000219097,9606.ENSP00000219150,9606.ENSP00000219919,9606.ENSP00000225655,9606.ENSP00000226279,9606.ENSP00000228843,9606.ENSP00000229239,9606.ENSP00000231009,9606.ENSP00000233143,9606.ENSP00000233893,9606.ENSP00000236147,…	TRIP13,CDC6,MMP11,HMOX1,GZMB,PSME2,AURKA,MYBL2,ORC6,CORO1A,AQP9,PFN1,CD38,RAD51AP1,GAPDH,GZMK,TMSB10,HSPE1,SELL,CTSD,RDH10,NCAPH,INHBA,HIST1H1D,HIST1H1A,DLGAP5,CD68,WISP1,ADAMDEC1,CCNB1,OASL,ESPL1,ORM1,CLPS,KIF23,KIF11,LYZ,LMNB1,NDC80,THOC1,CYBA,PKMYT1,COTL1,TYROBP,CCNE1,PRDX1,KIF18A,EPCAM,CAPG,CYTIP,POLQ,CD80,UBE2S,ICAM1,MCM2,CENPE,PITX1,TFEC,GAL,DBF4,ANLN,SQLE,ARNTL2,BCL2A1,PLK4,CD53,S100A11,CC…
GO:0007010	Cytoskeleton organization	61	1126	0.39	3.11e-08	9606.ENSP00000216911,9606.ENSP00000217026,9606.ENSP00000219150,9606.ENSP00000225655,9606.ENSP00000229239,9606.ENSP00000233143,9606.ENSP00000256442,9606.ENSP00000257934,9606.ENSP00000260363,9606.ENSP00000260731,9606.ENSP00000261597,9606.ENSP00000262629,9606.ENSP00000263181,9606.ENSP00000263753,9606.ENSP00000263867,9606.ENSP00000265148,9606.ENSP00000265748,9606.ENSP00000270861,9606.ENSP00000271452,…	AURKA,MYBL2,CORO1A,PFN1,GAPDH,TMSB10,CCNB1,ESPL1,KIF23,KIF11,NDC80,TYROBP,KIF18A,SGOL1,CAPG,CENPE,ANLN,PLK4,NUF2,POC1A,MAD2L1,KIAA0101,PLK1,TPX2,TUBA1C,BIRC5,KRT16,AURKB,CALR,SPAG5,TACC3,CENPA,NEK2,ASPM,CENPW,TTK,PSRC1,STIL,KIF2C,CDC20,RCC1,KIF4A,ACTL8,CALML5,CIT,PRC1,INCENP,KIF20A,CDK1,LCP1,DIAPH3,WDR62,SAPCD2,KIFC1,RACGAP1,STMN1,GAS2L3,ENSG00000258947,NUSAP1,KIF18B,ENSG00000158164
GO:0034097	Response to cytokine	60	1101	0.4	3.56e-08	9606.ENSP00000216117,9606.ENSP00000216802,9606.ENSP00000217026,9606.ENSP00000219150,9606.ENSP00000226279,9606.ENSP00000229239,9606.ENSP00000257570,9606.ENSP00000260102,9606.ENSP00000261366,9606.ENSP00000261623,9606.ENSP00000264246,9606.ENSP00000264832,9606.ENSP00000265056,9606.ENSP00000286758,9606.ENSP00000289902,9606.ENSP00000292303,9606.ENSP00000294507,9606.ENSP00000301633,9606.ENSP00000303634,…	HMOX1,PSME2,MYBL2,CORO1A,CD38,GAPDH,OASL,MRPL15,LMNB1,CYBA,CD80,ICAM1,MCM2,CXCL13,FCER1G,CCR5,LAPTM5,BIRC5,LRP8,CXCL10,CXCL8,ISG20,BOLA2B,CXCL11,MMP1,BOLA2,CD86,HIST2H3D,SHMT2,OAS2,IFI6,FN1,CCL20,HIST1H3J,STAT1,CXCL9,HDGF,HIST2H3C,FCGR1A,IRAK1,GBP5,SLC25A5,MMP9,PSMB9,HLA-DQA2,HLA-DQB1,UBD,HIST1H3D,ISG15,SDC1,RSAD2,HLA-DRA,LCP1,IFI30,HIST2H3A,CXCR4,HLA-B,LTB,IL32,ACP5
GO:0048522	Positive regulation of cellular process	184	5579	0.18	3.87e-08	9606.ENSP00000209728,9606.ENSP00000216117,9606.ENSP00000216341,9606.ENSP00000216802,9606.ENSP00000216911,9606.ENSP00000217026,9606.ENSP00000219150,9606.ENSP00000225655,9606.ENSP00000226279,9606.ENSP00000229239,9606.ENSP00000231009,9606.ENSP00000233893,9606.ENSP00000236671,9606.ENSP00000240285,9606.ENSP00000242208,9606.ENSP00000244534,9606.ENSP00000244573,9606.ENSP00000247191,9606.ENSP00000250160,…	CDC6,HMOX1,GZMB,PSME2,AURKA,MYBL2,CORO1A,PFN1,CD38,GAPDH,GZMK,HSPE1,CTSD,RDH10,INHBA,HIST1H1D,HIST1H1A,DLGAP5,WISP1,CCNB1,ESPL1,KIF23,NDC80,THOC1,CYBA,TYROBP,CCNE1,EPCAM,CD80,UBE2S,ICAM1,CENPE,PITX1,TFEC,GAL,DBF4,ANLN,ARNTL2,PLK4,CD53,S100A11,CCNA2,GZMA,PLA2G7,CDCA5,CCT5,CXCL13,ATAD2,FCER1G,EN1,KIAA1524,H2AFZ,POC1A,HMGB2,MAD2L1,MELK,PLK1,TPX2,CD3D,BIRC5,CLEC7A,LRP8,CDC25A,CTLA4,FEN1,CXCL10,CXCL8,…
GO:0045930	Negative regulation of mitotic cell cycle	29	308	0.63	3.91e-08	9606.ENSP00000166345,9606.ENSP00000209728,9606.ENSP00000216802,9606.ENSP00000216911,9606.ENSP00000256442,9606.ENSP00000287598,9606.ENSP00000296509,9606.ENSP00000300093,9606.ENSP00000301633,9606.ENSP00000302530,9606.ENSP00000312995,9606.ENSP00000313950,9606.ENSP00000320147,9606.ENSP00000321656,9606.ENSP00000323246,9606.ENSP00000345571,9606.ENSP00000347232,9606.ENSP00000355922,9606.ENSP00000358813,…	TRIP13,CDC6,PSME2,AURKA,CCNB1,BUB1B,MAD2L1,PLK1,BIRC5,BUB1,CLSPN,AURKB,EZH2,CDC25C,E2F7,E2F1,BLM,CENPF,TTK,ORC1,CDC20,ZWINT,PSMB9,PCNA,PTTG1,CDK1,TOP2A,CDKN2A,E2F8
GO:2000816	Negative regulation of mitotic sister chromatid separation	11	27	1.27	4.36e-08	9606.ENSP00000166345,9606.ENSP00000287598,9606.ENSP00000296509,9606.ENSP00000300093,9606.ENSP00000301633,9606.ENSP00000302530,9606.ENSP00000313950,9606.ENSP00000355922,9606.ENSP00000358813,9606.ENSP00000361540,9606.ENSP00000377536	TRIP13,BUB1B,MAD2L1,PLK1,BIRC5,BUB1,AURKB,CENPF,TTK,CDC20,PTTG1
GO:0019886	Antigen processing and presentation of exogenous peptide antigen via mhc class ii	17	96	0.91	4.69e-08	9606.ENSP00000236671,9606.ENSP00000260363,9606.ENSP00000260731,9606.ENSP00000263181,9606.ENSP00000265148,9606.ENSP00000289902,9606.ENSP00000324020,9606.ENSP00000345344,9606.ENSP00000357981,9606.ENSP00000361298,9606.ENSP00000363524,9606.ENSP00000364076,9606.ENSP00000364080,9606.ENSP00000378786,9606.ENSP00000384886,9606.ENSP00000398890,9606.ENSP00000404190	CTSD,KIF23,KIF11,KIF18A,CENPE,FCER1G,KIF15,CTSL,CTSS,KIF2C,KIF4A,HLA-DQA2,HLA-DQB1,HLA-DRA,IFI30,HLA-DMB,RACGAP1
GO:0061640	Cytoskeleton-dependent cytokinesis	17	98	0.9	6.12e-08	9606.ENSP00000257934,9606.ENSP00000260363,9606.ENSP00000265748,9606.ENSP00000300093,9606.ENSP00000301633,9606.ENSP00000313950,9606.ENSP00000336868,9606.ENSP00000360540,9606.ENSP00000363524,9606.ENSP00000367276,9606.ENSP00000376306,9606.ENSP00000377793,9606.ENSP00000378295,9606.ENSP00000378356,9606.ENSP00000404190,9606.ENSP00000410452,9606.ENSP00000453403	ESPL1,KIF23,ANLN,PLK1,BIRC5,AURKB,CENPA,CEP55,KIF4A,CKAP2,CIT,PRC1,INCENP,KIF20A,RACGAP1,STMN1,NUSAP1
GO:0071345	Cellular response to cytokine stimulus	56	1013	0.4	8.54e-08	9606.ENSP00000216117,9606.ENSP00000216802,9606.ENSP00000217026,9606.ENSP00000219150,9606.ENSP00000229239,9606.ENSP00000257570,9606.ENSP00000260102,9606.ENSP00000261366,9606.ENSP00000261623,9606.ENSP00000264246,9606.ENSP00000264832,9606.ENSP00000265056,9606.ENSP00000286758,9606.ENSP00000289902,9606.ENSP00000292303,9606.ENSP00000294507,9606.ENSP00000301633,9606.ENSP00000303634,9606.ENSP00000305651,…	HMOX1,PSME2,MYBL2,CORO1A,GAPDH,OASL,MRPL15,LMNB1,CYBA,CD80,ICAM1,MCM2,CXCL13,FCER1G,CCR5,LAPTM5,BIRC5,LRP8,CXCL10,CXCL8,ISG20,BOLA2B,CXCL11,MMP1,BOLA2,CD86,HIST2H3D,OAS2,IFI6,FN1,CCL20,HIST1H3J,STAT1,CXCL9,HDGF,HIST2H3C,FCGR1A,IRAK1,GBP5,SLC25A5,MMP9,PSMB9,HLA-DQA2,HLA-DQB1,HIST1H3D,ISG15,SDC1,RSAD2,HLA-DRA,LCP1,IFI30,HIST2H3A,CXCR4,HLA-B,LTB,IL32
GO:0040029	Regulation of gene expression, epigenetic	23	202	0.72	9.75e-08	9606.ENSP00000244534,9606.ENSP00000244573,9606.ENSP00000287394,9606.ENSP00000296417,9606.ENSP00000307705,9606.ENSP00000320147,9606.ENSP00000330074,9606.ENSP00000332790,9606.ENSP00000333277,9606.ENSP00000341094,9606.ENSP00000347168,9606.ENSP00000351589,9606.ENSP00000352119,9606.ENSP00000352252,9606.ENSP00000355656,9606.ENSP00000358154,9606.ENSP00000358155,9606.ENSP00000366956,9606.ENSP00000366999,…	HIST1H1D,HIST1H1A,ATAD2,H2AFZ,HIST1H1E,EZH2,HIST1H1B,HIST2H2AB,HIST2H3D,HIST1H2AD,HIST1H4J,HIST1H2AI,HIST1H2AG,HIST1H3J,HIST3H2A,HIST2H3C,HIST2H2AA,HIST1H4H,HIST1H3D,HIST1H4C,HIST2H3A,HMGA1,H2AFX
GO:0045814	Negative regulation of gene expression, epigenetic	17	103	0.88	1.14e-07	9606.ENSP00000296417,9606.ENSP00000320147,9606.ENSP00000332790,9606.ENSP00000333277,9606.ENSP00000341094,9606.ENSP00000347168,9606.ENSP00000351589,9606.ENSP00000352119,9606.ENSP00000352252,9606.ENSP00000355656,9606.ENSP00000358154,9606.ENSP00000358155,9606.ENSP00000366956,9606.ENSP00000366999,9606.ENSP00000367034,9606.ENSP00000385479,9606.ENSP00000434024	H2AFZ,EZH2,HIST2H2AB,HIST2H3D,HIST1H2AD,HIST1H4J,HIST1H2AI,HIST1H2AG,HIST1H3J,HIST3H2A,HIST2H3C,HIST2H2AA,HIST1H4H,HIST1H3D,HIST1H4C,HIST2H3A,H2AFX
GO:0009605	Response to external stimulus	96	2310	0.28	1.28e-07	9606.ENSP00000216117,9606.ENSP00000216341,9606.ENSP00000219150,9606.ENSP00000229239,9606.ENSP00000250092,9606.ENSP00000256442,9606.ENSP00000256722,9606.ENSP00000257570,9606.ENSP00000259938,9606.ENSP00000261267,9606.ENSP00000261623,9606.ENSP00000262428,9606.ENSP00000262629,9606.ENSP00000262746,9606.ENSP00000264246,9606.ENSP00000264832,9606.ENSP00000266503,9606.ENSP00000274306,9606.ENSP00000276708,…	HMOX1,GZMB,CORO1A,GAPDH,CD68,CCNB1,CMPK2,OASL,CLPS,LYZ,CYBA,COTL1,TYROBP,PRDX1,CD80,ICAM1,ARNTL2,GZMA,GSDMC,CCT5,CXCL13,SLAMF8,FCER1G,CCR5,HMGB2,KRT16,CLEC7A,CXCL10,CXCL8,ISG20,CXCL11,PPP1R14B,TRIM59,C1QB,MARCO,HIST1H2BC,DCTPP1,PMAIP1,APOBEC3B,CD86,SHMT2,PLAUR,EIF4EBP1,C15orf48,FPR3,OAS2,IFI6,IKZF3,HIST1H2BK,CCL20,STAT1,CXCL9,RGS1,SLAMF7,FABP7,S100A7,S100A8,S100A9,HIST2H2BE,FCGR1A,IRAK1,COL11A1,H…
GO:0010639	Negative regulation of organelle organization	32	395	0.57	1.36e-07	9606.ENSP00000166345,9606.ENSP00000219150,9606.ENSP00000225655,9606.ENSP00000233143,9606.ENSP00000244534,9606.ENSP00000244573,9606.ENSP00000257934,9606.ENSP00000263867,9606.ENSP00000265056,9606.ENSP00000287394,9606.ENSP00000287598,9606.ENSP00000296509,9606.ENSP00000300093,9606.ENSP00000300403,9606.ENSP00000301633,9606.ENSP00000302530,9606.ENSP00000307705,9606.ENSP00000313950,9606.ENSP00000328174,…	TRIP13,CORO1A,PFN1,TMSB10,HIST1H1D,HIST1H1A,ESPL1,CAPG,MCM2,ATAD2,BUB1B,MAD2L1,PLK1,TPX2,BIRC5,BUB1,HIST1H1E,AURKB,PIF1,HIST1H1B,HORMAD1,CENPF,NEK2,TTK,SLC25A5,CDC20,CKAP2,PTTG1,HMGA1,STMN1,TOP2A,ENSG00000158164
GO:0002443	Leukocyte mediated immunity	42	641	0.48	1.38e-07	9606.ENSP00000216341,9606.ENSP00000219150,9606.ENSP00000236147,9606.ENSP00000236671,9606.ENSP00000250092,9606.ENSP00000259396,9606.ENSP00000260118,9606.ENSP00000261267,9606.ENSP00000261623,9606.ENSP00000262428,9606.ENSP00000262629,9606.ENSP00000262746,9606.ENSP00000264832,9606.ENSP00000271324,9606.ENSP00000271638,9606.ENSP00000289902,9606.ENSP00000291568,9606.ENSP00000296370,9606.ENSP00000313967,…	GZMB,CORO1A,SELL,CTSD,CD68,ORM1,GGH,LYZ,CYBA,COTL1,TYROBP,PRDX1,ICAM1,CD53,S100A11,FCER1G,CSTB,S100P,C1QB,PLAUR,CTSB,PNP,ILF2,EXO1,SLAMF7,LAMTOR2,S100A7,S100A8,S100A9,CTSS,MMP9,PLAU,C1QA,HLA-DQB1,CYBB,PRDX4,CALML5,TSTA3,HLA-B,PTPRC,CLEC5A,ADAM8
GO:0007094	Mitotic spindle assembly checkpoint	10	23	1.3	1.54e-07	9606.ENSP00000166345,9606.ENSP00000287598,9606.ENSP00000296509,9606.ENSP00000300093,9606.ENSP00000301633,9606.ENSP00000302530,9606.ENSP00000313950,9606.ENSP00000355922,9606.ENSP00000358813,9606.ENSP00000361540	TRIP13,BUB1B,MAD2L1,PLK1,BIRC5,BUB1,AURKB,CENPF,TTK,CDC20
GO:0045931	Positive regulation of mitotic cell cycle	20	156	0.77	1.87e-07	9606.ENSP00000209728,9606.ENSP00000216911,9606.ENSP00000247191,9606.ENSP00000256442,9606.ENSP00000257934,9606.ENSP00000261597,9606.ENSP00000275517,9606.ENSP00000296509,9606.ENSP00000301633,9606.ENSP00000303706,9606.ENSP00000313950,9606.ENSP00000318977,9606.ENSP00000321656,9606.ENSP00000340691,9606.ENSP00000348838,9606.ENSP00000355958,9606.ENSP00000378699,9606.ENSP00000393139,9606.ENSP00000405726,…	CDC6,AURKA,DLGAP5,CCNB1,ESPL1,NDC80,CDCA5,MAD2L1,BIRC5,CDC25A,AURKB,GEN1,CDC25C,EIF4EBP1,UBE2C,DTL,CDK1,CDC7,CDC45,NUSAP1
GO:0090307	Mitotic spindle assembly	12	43	1.1	2.08e-07	9606.ENSP00000217026,9606.ENSP00000260363,9606.ENSP00000260731,9606.ENSP00000300403,9606.ENSP00000301633,9606.ENSP00000313950,9606.ENSP00000355966,9606.ENSP00000361540,9606.ENSP00000363524,9606.ENSP00000377793,9606.ENSP00000393963,9606.ENSP00000404190	MYBL2,KIF23,KIF11,TPX2,BIRC5,AURKB,NEK2,CDC20,KIF4A,PRC1,KIFC1,RACGAP1
GO:0002682	Regulation of immune system process	71	1514	0.33	2.85e-07	9606.ENSP00000216117,9606.ENSP00000216802,9606.ENSP00000219150,9606.ENSP00000226279,9606.ENSP00000236147,9606.ENSP00000242208,9606.ENSP00000250092,9606.ENSP00000259396,9606.ENSP00000261600,9606.ENSP00000262629,9606.ENSP00000264246,9606.ENSP00000264832,9606.ENSP00000265643,9606.ENSP00000274793,9606.ENSP00000285670,9606.ENSP00000286758,9606.ENSP00000289707,9606.ENSP00000289902,9606.ENSP00000296503,…	HMOX1,PSME2,CORO1A,CD38,SELL,INHBA,CD68,ORM1,THOC1,TYROBP,CD80,ICAM1,GAL,PLA2G7,SAMSN1,CXCL13,SLAMF8,FCER1G,HMGB2,CD3D,CLEC7A,LRP8,CTLA4,CXCL10,CXCL8,C1QB,ICOS,CALR,SOX11,CD86,HIST2H3D,NME1,FPR3,IKZF3,HIST1H4J,CCL20,HIST1H3J,STAT1,PNP,FCGR3A,SLAMF7,S100A7,HIST2H3C,FCGR1A,CD2,HMGB3,GBP5,C1QA,PSMB9,HLA-DQA2,HLA-DQB1,HIST1H4H,HIST1H3D,HIST1H4C,ISG15,RSAD2,FANCA,LILRB4,HLA-DRA,PPAPDC1A,HIST2H3A,HLA-D…
GO:0051302	Regulation of cell division	22	197	0.71	2.87e-07	9606.ENSP00000209728,9606.ENSP00000216911,9606.ENSP00000219097,9606.ENSP00000247191,9606.ENSP00000257934,9606.ENSP00000260363,9606.ENSP00000270861,9606.ENSP00000300093,9606.ENSP00000313950,9606.ENSP00000323246,9606.ENSP00000347232,9606.ENSP00000356319,9606.ENSP00000356379,9606.ENSP00000357189,9606.ENSP00000376306,9606.ENSP00000377793,9606.ENSP00000378295,9606.ENSP00000378356,9606.ENSP00000404190,…	CDC6,AURKA,ORC6,DLGAP5,ESPL1,KIF23,PLK4,PLK1,AURKB,E2F7,BLM,KIF14,ASPM,HDGF,CIT,PRC1,INCENP,KIF20A,RACGAP1,NUSAP1,KIF18B,E2F8
GO:0010389	Regulation of g2/m transition of mitotic cell cycle	22	198	0.7	3.1e-07	9606.ENSP00000209728,9606.ENSP00000216802,9606.ENSP00000216911,9606.ENSP00000256442,9606.ENSP00000270861,9606.ENSP00000300093,9606.ENSP00000300403,9606.ENSP00000303706,9606.ENSP00000312995,9606.ENSP00000313950,9606.ENSP00000321656,9606.ENSP00000347232,9606.ENSP00000355922,9606.ENSP00000355958,9606.ENSP00000355966,9606.ENSP00000356319,9606.ENSP00000360623,9606.ENSP00000363993,9606.ENSP00000377492,…	CDC6,PSME2,AURKA,CCNB1,PLK4,PLK1,TPX2,CDC25A,CLSPN,AURKB,CDC25C,BLM,CENPF,DTL,NEK2,KIF14,ORC1,PSMB9,HMMR,CDK1,CDC7,CDKN2A
GO:0000079	Regulation of cyclin-dependent protein serine/threonine kinase activity	16	97	0.88	3.25e-07	9606.ENSP00000209728,9606.ENSP00000256442,9606.ENSP00000262300,9606.ENSP00000262643,9606.ENSP00000274026,9606.ENSP00000288207,9606.ENSP00000300093,9606.ENSP00000303706,9606.ENSP00000311083,9606.ENSP00000321656,9606.ENSP00000335357,9606.ENSP00000347232,9606.ENSP00000358925,9606.ENSP00000364976,9606.ENSP00000418915,9606.ENSP00000429089	CDC6,CCNB1,PKMYT1,CCNE1,CCNA2,CCNB2,PLK1,CDC25A,CKS1B,CDC25C,CDKN3,BLM,PSRC1,CKS2,CDKN2A,CCNE2
GO:0051784	Negative regulation of nuclear division	12	48	1.06	5.67e-07	9606.ENSP00000166345,9606.ENSP00000287598,9606.ENSP00000296509,9606.ENSP00000300093,9606.ENSP00000301633,9606.ENSP00000302530,9606.ENSP00000313950,9606.ENSP00000355167,9606.ENSP00000355922,9606.ENSP00000358813,9606.ENSP00000361540,9606.ENSP00000377536	TRIP13,BUB1B,MAD2L1,PLK1,BIRC5,BUB1,AURKB,HORMAD1,CENPF,TTK,CDC20,PTTG1
GO:0045321	Leukocyte activation	51	929	0.4	5.76e-07	9606.ENSP00000219150,9606.ENSP00000236147,9606.ENSP00000236671,9606.ENSP00000250092,9606.ENSP00000259396,9606.ENSP00000260118,9606.ENSP00000261267,9606.ENSP00000261623,9606.ENSP00000262428,9606.ENSP00000262629,9606.ENSP00000262746,9606.ENSP00000264832,9606.ENSP00000271324,9606.ENSP00000271638,9606.ENSP00000289707,9606.ENSP00000289902,9606.ENSP00000291568,9606.ENSP00000296370,9606.ENSP00000300692,…	CORO1A,SELL,CTSD,CD68,ORM1,GGH,LYZ,CYBA,COTL1,TYROBP,PRDX1,ICAM1,CD53,S100A11,SLAMF8,FCER1G,CSTB,S100P,CD3D,LY6D,CLEC7A,CXCL8,CD86,PLAUR,IKZF3,CTSB,PNP,ILF2,EXO1,SLAMF7,LAMTOR2,S100A7,S100A8,S100A9,CTSS,CD2,MMP9,PLAU,C1QA,UBD,CYBB,PRDX4,CALML5,RSAD2,HELLS,LCP1,HLA-B,PTPRC,MS4A1,CLEC5A,ADAM8
GO:0045132	Meiotic chromosome segregation	15	87	0.9	5.81e-07	9606.ENSP00000166345,9606.ENSP00000240423,9606.ENSP00000257934,9606.ENSP00000262643,9606.ENSP00000263753,9606.ENSP00000271452,9606.ENSP00000287598,9606.ENSP00000300093,9606.ENSP00000302530,9606.ENSP00000349961,9606.ENSP00000355167,9606.ENSP00000358813,9606.ENSP00000377536,9606.ENSP00000411532,9606.ENSP00000429089	TRIP13,NCAPH,ESPL1,CCNE1,SGOL1,NUF2,BUB1B,PLK1,BUB1,SMC4,HORMAD1,TTK,PTTG1,TOP2A,CCNE2
GO:0044085	Cellular component biogenesis	101	2583	0.25	8.39e-07	9606.ENSP00000166345,9606.ENSP00000216911,9606.ENSP00000217026,9606.ENSP00000219150,9606.ENSP00000244534,9606.ENSP00000244573,9606.ENSP00000256442,9606.ENSP00000260363,9606.ENSP00000260731,9606.ENSP00000261623,9606.ENSP00000262105,9606.ENSP00000263382,9606.ENSP00000263867,9606.ENSP00000264233,9606.ENSP00000264552,9606.ENSP00000265056,9606.ENSP00000265148,9606.ENSP00000265748,9606.ENSP00000265896,…	TRIP13,AURKA,MYBL2,CORO1A,HIST1H1D,HIST1H1A,CCNB1,KIF23,KIF11,CYBA,MCM4,ASF1B,CAPG,POLQ,UBE2S,MCM2,CENPE,ANLN,SQLE,PLK4,SNRPG,CENPU,HIST1H2BD,POC1A,HMGB2,PLK1,TPX2,BIRC5,TK1,ISG20,BOLA2B,HIST1H1E,AURKB,CALR,HIST1H2BC,HIST1H1B,BOLA2,HIST2H3D,SHMT2,CDKN3,CASC5,CENPA,C20orf24,FN1,HIST1H4J,BLM,UBE2C,HIST1H2BK,HIST1H3J,RRM2,HORMAD1,EXO1,COA6,CENPF,NEK2,ASPM,CENPW,HIST2H2BE,HIST2H3C,GBP5,CDC20,SRPK1,RC…
GO:0034508	Centromere complex assembly	12	52	1.02	1.18e-06	9606.ENSP00000265148,9606.ENSP00000281453,9606.ENSP00000335463,9606.ENSP00000336868,9606.ENSP00000347168,9606.ENSP00000355922,9606.ENSP00000357308,9606.ENSP00000366956,9606.ENSP00000367034,9606.ENSP00000377007,9606.ENSP00000377601,9606.ENSP00000414109	CENPE,CENPU,CASC5,CENPA,HIST1H4J,CENPF,CENPW,HIST1H4H,HIST1H4C,CENPN,HELLS,HJURP
GO:0051716	Cellular response to stimulus	199	6489	0.15	1.62e-06	9606.ENSP00000166345,9606.ENSP00000209728,9606.ENSP00000216117,9606.ENSP00000216341,9606.ENSP00000216802,9606.ENSP00000216911,9606.ENSP00000217026,9606.ENSP00000219150,9606.ENSP00000219919,9606.ENSP00000221486,9606.ENSP00000225655,9606.ENSP00000226279,9606.ENSP00000228843,9606.ENSP00000229239,9606.ENSP00000242208,9606.ENSP00000247191,9606.ENSP00000250092,9606.ENSP00000250160,9606.ENSP00000256442,…	TRIP13,CDC6,HMOX1,GZMB,PSME2,AURKA,MYBL2,CORO1A,AQP9,RNASEH2A,PFN1,CD38,RAD51AP1,GAPDH,INHBA,DLGAP5,CD68,WISP1,CCNB1,CMPK2,OASL,MRPL15,LMNB1,THOC1,CYBA,MCM4,TYROBP,CCNE1,PRDX1,KIF18A,EPCAM,POLQ,CD80,NEIL3,ICAM1,MCM2,TFEC,GAL,BCL2A1,CD53,S100A11,CCNA2,GGCT,CDCA5,PPP4C,UCHL1,PDIA4,CXCL13,SLAMF8,FCER1G,CCR5,LAPTM5,H2AFZ,HMGB2,MELK,KIAA0101,PLK1,CD3D,BIRC5,CLEC7A,LRP8,CDC25A,CTLA4,FEN1,CXCL10,SHCBP1,…
GO:0007080	Mitotic metaphase plate congression	11	44	1.06	2.38e-06	9606.ENSP00000256442,9606.ENSP00000261597,9606.ENSP00000263181,9606.ENSP00000265148,9606.ENSP00000271452,9606.ENSP00000275517,9606.ENSP00000356319,9606.ENSP00000358925,9606.ENSP00000361298,9606.ENSP00000362146,9606.ENSP00000393963	CCNB1,NDC80,KIF18A,CENPE,NUF2,CDCA5,KIF14,PSRC1,KIF2C,CDCA8,KIFC1
GO:0009617	Response to bacterium	39	634	0.45	2.43e-06	9606.ENSP00000250092,9606.ENSP00000256722,9606.ENSP00000259938,9606.ENSP00000261267,9606.ENSP00000264246,9606.ENSP00000264832,9606.ENSP00000274306,9606.ENSP00000276708,9606.ENSP00000286758,9606.ENSP00000289707,9606.ENSP00000289902,9606.ENSP00000292303,9606.ENSP00000296503,9606.ENSP00000305651,9606.ENSP00000306512,9606.ENSP00000306884,9606.ENSP00000321744,9606.ENSP00000332049,9606.ENSP00000341610,…	CD68,CMPK2,CLPS,LYZ,CD80,ICAM1,GZMA,GSDMC,CXCL13,SLAMF8,FCER1G,CCR5,HMGB2,CXCL10,CXCL8,CXCL11,HIST1H2BC,CD86,C15orf48,OAS2,IKZF3,HIST1H2BK,CCL20,CXCL9,RGS1,S100A7,S100A8,S100A9,HIST2H2BE,IRAK1,GBP5,ISG15,GJB2,HLA-B,OCIAD2,IDO1,MS4A1,ACP5,HIST1H2BJ
GO:0006338	Chromatin remodeling	21	206	0.67	2.59e-06	9606.ENSP00000281453,9606.ENSP00000296503,9606.ENSP00000333277,9606.ENSP00000335463,9606.ENSP00000336868,9606.ENSP00000346997,9606.ENSP00000347168,9606.ENSP00000352252,9606.ENSP00000357308,9606.ENSP00000358154,9606.ENSP00000359393,9606.ENSP00000366956,9606.ENSP00000366999,9606.ENSP00000367034,9606.ENSP00000377007,9606.ENSP00000377601,9606.ENSP00000385479,9606.ENSP00000399888,9606.ENSP00000414109,…	CENPU,HMGB2,HIST2H3D,CASC5,CENPA,SUV39H2,HIST1H4J,HIST1H3J,CENPW,HIST2H3C,HMGB3,HIST1H4H,HIST1H3D,HIST1H4C,CENPN,HELLS,HIST2H3A,HMGA1,HJURP,CDKN2A,ANP32E
GO:1901989	Positive regulation of cell cycle phase transition	15	99	0.84	2.59e-06	9606.ENSP00000209728,9606.ENSP00000247191,9606.ENSP00000256442,9606.ENSP00000257934,9606.ENSP00000275517,9606.ENSP00000301633,9606.ENSP00000303706,9606.ENSP00000320147,9606.ENSP00000321656,9606.ENSP00000348838,9606.ENSP00000355958,9606.ENSP00000378699,9606.ENSP00000393139,9606.ENSP00000405726,9606.ENSP00000481110	CDC6,DLGAP5,CCNB1,ESPL1,CDCA5,BIRC5,CDC25A,EZH2,CDC25C,UBE2C,DTL,CDK1,CDC7,CDC45,FAM83D
GO:0031570	DNA integrity checkpoint	18	151	0.74	3e-06	9606.ENSP00000209728,9606.ENSP00000216911,9606.ENSP00000256442,9606.ENSP00000300093,9606.ENSP00000312995,9606.ENSP00000321656,9606.ENSP00000323246,9606.ENSP00000345571,9606.ENSP00000347232,9606.ENSP00000355958,9606.ENSP00000360623,9606.ENSP00000368458,9606.ENSP00000378699,9606.ENSP00000405726,9606.ENSP00000411532,9606.ENSP00000434024,9606.ENSP00000450607,9606.ENSP00000481103	CDC6,AURKA,CCNB1,PLK1,CLSPN,CDC25C,E2F7,E2F1,BLM,DTL,ORC1,PCNA,CDK1,CDC45,TOP2A,H2AFX,TIMELESS,E2F8
GO:0032465	Regulation of cytokinesis	14	89	0.86	4.95e-06	9606.ENSP00000209728,9606.ENSP00000216911,9606.ENSP00000260363,9606.ENSP00000270861,9606.ENSP00000300093,9606.ENSP00000313950,9606.ENSP00000323246,9606.ENSP00000356319,9606.ENSP00000376306,9606.ENSP00000377793,9606.ENSP00000378295,9606.ENSP00000378356,9606.ENSP00000404190,9606.ENSP00000481103	CDC6,AURKA,KIF23,PLK4,PLK1,AURKB,E2F7,KIF14,CIT,PRC1,INCENP,KIF20A,RACGAP1,E2F8
GO:0051383	Kinetochore organization	8	18	1.31	5.36e-06	9606.ENSP00000261597,9606.ENSP00000265148,9606.ENSP00000271452,9606.ENSP00000336868,9606.ENSP00000349961,9606.ENSP00000355922,9606.ENSP00000357308,9606.ENSP00000377007	NDC80,CENPE,NUF2,CENPA,SMC4,CENPF,CENPW,CENPN
GO:0042119	Neutrophil activation	33	497	0.48	5.68e-06	9606.ENSP00000236147,9606.ENSP00000236671,9606.ENSP00000250092,9606.ENSP00000259396,9606.ENSP00000260118,9606.ENSP00000261267,9606.ENSP00000261623,9606.ENSP00000262428,9606.ENSP00000262629,9606.ENSP00000271324,9606.ENSP00000271638,9606.ENSP00000289902,9606.ENSP00000291568,9606.ENSP00000296370,9606.ENSP00000306512,9606.ENSP00000339328,9606.ENSP00000345672,9606.ENSP00000354532,9606.ENSP00000355011,…	SELL,CTSD,CD68,ORM1,GGH,LYZ,CYBA,COTL1,TYROBP,CD53,S100A11,FCER1G,CSTB,S100P,CXCL8,PLAUR,CTSB,PNP,ILF2,LAMTOR2,S100A7,S100A8,S100A9,CTSS,MMP9,PLAU,CYBB,PRDX4,CALML5,HLA-B,PTPRC,CLEC5A,ADAM8
GO:0006310	DNA recombination	21	219	0.64	6.54e-06	9606.ENSP00000166345,9606.ENSP00000228843,9606.ENSP00000240488,9606.ENSP00000262105,9606.ENSP00000264233,9606.ENSP00000265056,9606.ENSP00000296503,9606.ENSP00000305480,9606.ENSP00000318977,9606.ENSP00000328174,9606.ENSP00000347232,9606.ENSP00000355506,9606.ENSP00000359393,9606.ENSP00000361043,9606.ENSP00000372088,9606.ENSP00000386239,9606.ENSP00000393139,9606.ENSP00000405726,9606.ENSP00000411532,…	TRIP13,RAD51AP1,MND1,MCM4,POLQ,MCM2,HMGB2,FEN1,GEN1,PIF1,BLM,EXO1,HMGB3,RAD54L,RAD51,TONSL,CDC7,CDC45,TOP2A,H2AFX,RECQL4
GO:0060255	Regulation of macromolecule metabolic process	194	6407	0.14	7.97e-06	9606.ENSP00000166345,9606.ENSP00000209728,9606.ENSP00000216117,9606.ENSP00000216341,9606.ENSP00000216802,9606.ENSP00000216911,9606.ENSP00000217026,9606.ENSP00000225655,9606.ENSP00000226279,9606.ENSP00000228843,9606.ENSP00000229239,9606.ENSP00000233893,9606.ENSP00000236671,9606.ENSP00000242208,9606.ENSP00000244534,9606.ENSP00000244573,9606.ENSP00000247191,9606.ENSP00000250160,9606.ENSP00000256442,…	TRIP13,CDC6,HMOX1,GZMB,PSME2,AURKA,MYBL2,PFN1,CD38,RAD51AP1,GAPDH,HSPE1,CTSD,INHBA,HIST1H1D,HIST1H1A,DLGAP5,WISP1,CCNB1,OASL,ESPL1,ORM1,THOC1,CYBA,PKMYT1,TYROBP,CCNE1,PRDX1,EPCAM,POLQ,CD80,UBE2S,ICAM1,CENPE,PITX1,TFEC,GAL,DBF4,ARNTL2,S100A11,CCNA2,GZMA,NFKBIE,PPP4C,CCT5,UCHL1,SAMSN1,ATAD2,CCNB2,FCER1G,CSTB,EN1,H2AFZ,HMGB2,MAD2L1,PLK1,TPX2,CD3D,BIRC5,CLEC7A,LRP8,CDC25A,CXCL10,CST1,MRPL13,CDCA7,HIS…
GO:0043299	Leukocyte degranulation	33	506	0.47	8.23e-06	9606.ENSP00000219150,9606.ENSP00000236147,9606.ENSP00000236671,9606.ENSP00000250092,9606.ENSP00000259396,9606.ENSP00000260118,9606.ENSP00000261267,9606.ENSP00000261623,9606.ENSP00000262428,9606.ENSP00000262629,9606.ENSP00000271324,9606.ENSP00000271638,9606.ENSP00000289902,9606.ENSP00000291568,9606.ENSP00000296370,9606.ENSP00000339328,9606.ENSP00000345672,9606.ENSP00000354532,9606.ENSP00000355011,…	CORO1A,SELL,CTSD,CD68,ORM1,GGH,LYZ,CYBA,COTL1,TYROBP,CD53,S100A11,FCER1G,CSTB,S100P,PLAUR,CTSB,PNP,ILF2,LAMTOR2,S100A7,S100A8,S100A9,CTSS,MMP9,PLAU,CYBB,PRDX4,CALML5,HLA-B,PTPRC,CLEC5A,ADAM8
GO:0050790	Regulation of catalytic activity	92	2386	0.25	8.24e-06	9606.ENSP00000209728,9606.ENSP00000216802,9606.ENSP00000225655,9606.ENSP00000229239,9606.ENSP00000231009,9606.ENSP00000233893,9606.ENSP00000236671,9606.ENSP00000240423,9606.ENSP00000256442,9606.ENSP00000257570,9606.ENSP00000259938,9606.ENSP00000261623,9606.ENSP00000262300,9606.ENSP00000262643,9606.ENSP00000264552,9606.ENSP00000264832,9606.ENSP00000265056,9606.ENSP00000265148,9606.ENSP00000265728,…	CDC6,PSME2,PFN1,GAPDH,GZMK,HSPE1,CTSD,NCAPH,CCNB1,OASL,CLPS,CYBA,PKMYT1,CCNE1,UBE2S,ICAM1,MCM2,CENPE,DBF4,CCNA2,GZMA,PPP4C,UCHL1,CXCL13,CCNB2,SLAMF8,CSTB,HMGB2,MAD2L1,PLK1,TPX2,BIRC5,CLEC7A,LRP8,CDC25A,CXCL10,CST1,PPP1R14B,CKS1B,CLSPN,AURKB,EZH2,CDC25C,PMAIP1,PIF1,CD86,CDKN3,CASC5,PLAUR,OAS2,IFI6,CTSB,FN1,BLM,UBE2C,CCL20,IQGAP3,ARHGAP11A,PPP1R14C,NEK2,KIF14,RGS1,LAMTOR2,S100A8,S100A9,FCGR1A,PSRC1…
GO:0043312	Neutrophil degranulation	32	484	0.48	9.62e-06	9606.ENSP00000236147,9606.ENSP00000236671,9606.ENSP00000250092,9606.ENSP00000259396,9606.ENSP00000260118,9606.ENSP00000261267,9606.ENSP00000261623,9606.ENSP00000262428,9606.ENSP00000262629,9606.ENSP00000271324,9606.ENSP00000271638,9606.ENSP00000289902,9606.ENSP00000291568,9606.ENSP00000296370,9606.ENSP00000339328,9606.ENSP00000345672,9606.ENSP00000354532,9606.ENSP00000355011,9606.ENSP00000357288,…	SELL,CTSD,CD68,ORM1,GGH,LYZ,CYBA,COTL1,TYROBP,CD53,S100A11,FCER1G,CSTB,S100P,PLAUR,CTSB,PNP,ILF2,LAMTOR2,S100A7,S100A8,S100A9,CTSS,MMP9,PLAU,CYBB,PRDX4,CALML5,HLA-B,PTPRC,CLEC5A,ADAM8
GO:0007127	Meiosis i	15	112	0.79	1.04e-05	9606.ENSP00000166345,9606.ENSP00000216911,9606.ENSP00000240488,9606.ENSP00000257934,9606.ENSP00000262643,9606.ENSP00000263753,9606.ENSP00000300093,9606.ENSP00000355167,9606.ENSP00000361043,9606.ENSP00000364976,9606.ENSP00000372088,9606.ENSP00000377536,9606.ENSP00000411532,9606.ENSP00000429089,9606.ENSP00000429633	TRIP13,AURKA,MND1,ESPL1,CCNE1,SGOL1,PLK1,HORMAD1,RAD54L,CKS2,RAD51,PTTG1,TOP2A,CCNE2,MYBL1
GO:0042127	Regulation of cell population proliferation	70	1642	0.29	1.19e-05	9606.ENSP00000209728,9606.ENSP00000216117,9606.ENSP00000219150,9606.ENSP00000226279,9606.ENSP00000242208,9606.ENSP00000250160,9606.ENSP00000256442,9606.ENSP00000261623,9606.ENSP00000262629,9606.ENSP00000262643,9606.ENSP00000263735,9606.ENSP00000264246,9606.ENSP00000265643,9606.ENSP00000265896,9606.ENSP00000271638,9606.ENSP00000274026,9606.ENSP00000295746,9606.ENSP00000296503,9606.ENSP00000301633,…	CDC6,HMOX1,CORO1A,CD38,INHBA,WISP1,CCNB1,CYBA,TYROBP,CCNE1,EPCAM,CD80,GAL,SQLE,S100A11,CCNA2,KIAA1524,HMGB2,BIRC5,CLEC7A,CTLA4,CXCL10,SHCBP1,CXCL8,CXCL11,CDCA7,EZH2,CALR,SOX11,E2F7,CTHRC1,IDH2,CD86,SHMT2,CDKN3,NME1,FOXM1,IKZF3,E2F1,FN1,DHCR7,STAT1,IQGAP3,PNP,CXCL9,KIF14,ASPM,FABP7,TTK,IRAK1,SLC25A5,MMP9,CDC20,PLAU,MARCKSL1,RTKN2,PIM2,PRDX4,ESM1,FANCA,PRC1,CDK1,SAPCD2,CDC7,HLA-DMB,HMGA1,PTPRC,CDKN…
GO:1901992	Positive regulation of mitotic cell cycle phase transition	13	82	0.86	1.28e-05	9606.ENSP00000209728,9606.ENSP00000247191,9606.ENSP00000256442,9606.ENSP00000257934,9606.ENSP00000275517,9606.ENSP00000301633,9606.ENSP00000303706,9606.ENSP00000321656,9606.ENSP00000348838,9606.ENSP00000355958,9606.ENSP00000378699,9606.ENSP00000393139,9606.ENSP00000405726	CDC6,DLGAP5,CCNB1,ESPL1,CDCA5,BIRC5,CDC25A,CDC25C,UBE2C,DTL,CDK1,CDC7,CDC45
GO:0070192	Chromosome organization involved in meiotic cell cycle	12	68	0.91	1.39e-05	9606.ENSP00000166345,9606.ENSP00000240423,9606.ENSP00000262643,9606.ENSP00000263753,9606.ENSP00000287598,9606.ENSP00000302530,9606.ENSP00000325017,9606.ENSP00000349961,9606.ENSP00000355167,9606.ENSP00000372088,9606.ENSP00000378295,9606.ENSP00000429089	TRIP13,NCAPH,CCNE1,SGOL1,BUB1B,BUB1,NCAPD2,SMC4,HORMAD1,RAD51,INCENP,CCNE2
GO:0031145	Anaphase-promoting complex-dependent catabolic process	13	83	0.85	1.43e-05	9606.ENSP00000216802,9606.ENSP00000216911,9606.ENSP00000256442,9606.ENSP00000264552,9606.ENSP00000287598,9606.ENSP00000296509,9606.ENSP00000300093,9606.ENSP00000313950,9606.ENSP00000348838,9606.ENSP00000361540,9606.ENSP00000363993,9606.ENSP00000377536,9606.ENSP00000378699	PSME2,AURKA,CCNB1,UBE2S,BUB1B,MAD2L1,PLK1,AURKB,UBE2C,CDC20,PSMB9,PTTG1,CDK1
GO:0051129	Negative regulation of cellular component organization	40	713	0.41	1.46e-05	9606.ENSP00000166345,9606.ENSP00000219150,9606.ENSP00000225655,9606.ENSP00000226279,9606.ENSP00000233143,9606.ENSP00000244534,9606.ENSP00000244573,9606.ENSP00000257934,9606.ENSP00000263867,9606.ENSP00000265056,9606.ENSP00000287394,9606.ENSP00000287598,9606.ENSP00000296509,9606.ENSP00000300093,9606.ENSP00000300403,9606.ENSP00000301633,9606.ENSP00000302530,9606.ENSP00000305651,9606.ENSP00000307705,…	TRIP13,CORO1A,PFN1,CD38,TMSB10,HIST1H1D,HIST1H1A,ESPL1,CAPG,MCM2,ATAD2,BUB1B,MAD2L1,PLK1,TPX2,BIRC5,BUB1,CXCL10,HIST1H1E,AURKB,PIF1,HIST1H1B,EIF4EBP1,HORMAD1,CENPF,NEK2,KIF14,TTK,SLC25A5,CDC20,DKK1,CKAP2,PTTG1,SPP1,HMGA1,STMN1,TOP2A,APOC1,APOC2,ENSG00000158164
GO:0001775	Cell activation	52	1075	0.34	1.67e-05	9606.ENSP00000219150,9606.ENSP00000236147,9606.ENSP00000236671,9606.ENSP00000250092,9606.ENSP00000259396,9606.ENSP00000260118,9606.ENSP00000261267,9606.ENSP00000261623,9606.ENSP00000262428,9606.ENSP00000262629,9606.ENSP00000262746,9606.ENSP00000264832,9606.ENSP00000271324,9606.ENSP00000271638,9606.ENSP00000289707,9606.ENSP00000289902,9606.ENSP00000291568,9606.ENSP00000296370,9606.ENSP00000300692,…	CORO1A,SELL,CTSD,CD68,ORM1,GGH,LYZ,CYBA,COTL1,TYROBP,PRDX1,ICAM1,CD53,S100A11,SLAMF8,FCER1G,CSTB,S100P,CD3D,LY6D,CLEC7A,CXCL10,CXCL8,CD86,PLAUR,IKZF3,CTSB,PNP,ILF2,EXO1,SLAMF7,LAMTOR2,S100A7,S100A8,S100A9,CTSS,CD2,MMP9,PLAU,C1QA,UBD,CYBB,PRDX4,CALML5,RSAD2,HELLS,LCP1,HLA-B,PTPRC,MS4A1,CLEC5A,ADAM8
GO:0019222	Regulation of metabolic process	205	6948	0.13	1.69e-05	9606.ENSP00000166345,9606.ENSP00000209728,9606.ENSP00000216117,9606.ENSP00000216341,9606.ENSP00000216802,9606.ENSP00000216911,9606.ENSP00000217026,9606.ENSP00000225655,9606.ENSP00000226279,9606.ENSP00000228843,9606.ENSP00000229239,9606.ENSP00000231009,9606.ENSP00000233893,9606.ENSP00000236671,9606.ENSP00000240285,9606.ENSP00000242208,9606.ENSP00000244534,9606.ENSP00000244573,9606.ENSP00000247191,…	TRIP13,CDC6,HMOX1,GZMB,PSME2,AURKA,MYBL2,PFN1,CD38,RAD51AP1,GAPDH,GZMK,HSPE1,CTSD,RDH10,INHBA,HIST1H1D,HIST1H1A,DLGAP5,WISP1,CCNB1,OASL,ESPL1,ORM1,THOC1,CYBA,PKMYT1,TYROBP,CCNE1,PRDX1,EPCAM,POLQ,CD80,UBE2S,ICAM1,CENPE,PITX1,TFEC,GAL,DBF4,SQLE,ARNTL2,S100A11,CCNA2,GZMA,NFKBIE,PPP4C,CCT5,UCHL1,SAMSN1,ATAD2,CCNB2,SLAMF8,FCER1G,CSTB,EN1,H2AFZ,HMGB2,MAD2L1,PLK1,TPX2,CD3D,BIRC5,CLEC7A,LRP8,CDC25A,CXCL1…
GO:0006270	DNA replication initiation	9	32	1.11	1.72e-05	9606.ENSP00000209728,9606.ENSP00000219097,9606.ENSP00000262105,9606.ENSP00000262643,9606.ENSP00000265056,9606.ENSP00000360623,9606.ENSP00000405726,9606.ENSP00000418268,9606.ENSP00000429089	CDC6,ORC6,MCM4,CCNE1,MCM2,ORC1,CDC45,MCM10,CCNE2
GO:0000724	Double-strand break repair via homologous recombination	14	102	0.8	1.99e-05	9606.ENSP00000228843,9606.ENSP00000262105,9606.ENSP00000264233,9606.ENSP00000265056,9606.ENSP00000305480,9606.ENSP00000318977,9606.ENSP00000347232,9606.ENSP00000361043,9606.ENSP00000372088,9606.ENSP00000386239,9606.ENSP00000393139,9606.ENSP00000405726,9606.ENSP00000434024,9606.ENSP00000482313	RAD51AP1,MCM4,POLQ,MCM2,FEN1,GEN1,BLM,RAD54L,RAD51,TONSL,CDC7,CDC45,H2AFX,RECQL4
GO:0002274	Myeloid leukocyte activation	35	585	0.44	2.13e-05	9606.ENSP00000236147,9606.ENSP00000236671,9606.ENSP00000250092,9606.ENSP00000259396,9606.ENSP00000260118,9606.ENSP00000261267,9606.ENSP00000261623,9606.ENSP00000262428,9606.ENSP00000262629,9606.ENSP00000271324,9606.ENSP00000271638,9606.ENSP00000289902,9606.ENSP00000291568,9606.ENSP00000296370,9606.ENSP00000306512,9606.ENSP00000339328,9606.ENSP00000345672,9606.ENSP00000354532,9606.ENSP00000355011,…	SELL,CTSD,CD68,ORM1,GGH,LYZ,CYBA,COTL1,TYROBP,CD53,S100A11,FCER1G,CSTB,S100P,CXCL8,PLAUR,CTSB,PNP,ILF2,LAMTOR2,S100A7,S100A8,S100A9,CTSS,MMP9,PLAU,C1QA,UBD,CYBB,PRDX4,CALML5,HLA-B,PTPRC,CLEC5A,ADAM8
GO:0031507	Heterochromatin assembly	11	58	0.94	2.33e-05	9606.ENSP00000333277,9606.ENSP00000347168,9606.ENSP00000352252,9606.ENSP00000358154,9606.ENSP00000366956,9606.ENSP00000366999,9606.ENSP00000367034,9606.ENSP00000377601,9606.ENSP00000385479,9606.ENSP00000399888,9606.ENSP00000418915	HIST2H3D,HIST1H4J,HIST1H3J,HIST2H3C,HIST1H4H,HIST1H3D,HIST1H4C,HELLS,HIST2H3A,HMGA1,CDKN2A
GO:0010033	Response to organic substance	107	3011	0.21	2.73e-05	9606.ENSP00000209728,9606.ENSP00000216117,9606.ENSP00000216802,9606.ENSP00000217026,9606.ENSP00000219150,9606.ENSP00000219919,9606.ENSP00000226279,9606.ENSP00000229239,9606.ENSP00000233893,9606.ENSP00000236147,9606.ENSP00000242208,9606.ENSP00000250092,9606.ENSP00000256442,9606.ENSP00000256722,9606.ENSP00000257570,9606.ENSP00000260102,9606.ENSP00000260118,9606.ENSP00000261366,9606.ENSP00000261623,…	CDC6,HMOX1,PSME2,MYBL2,CORO1A,AQP9,CD38,GAPDH,HSPE1,SELL,INHBA,CD68,CCNB1,CMPK2,OASL,MRPL15,GGH,LMNB1,CYBA,CCNE1,KIF18A,CD80,ICAM1,MCM2,GAL,SQLE,CCNA2,CXCL13,FCER1G,CCR5,LAPTM5,S100P,H2AFZ,HMGB2,LY6D,BIRC5,CLEC7A,LRP8,CXCL10,SHCBP1,CXCL8,ISG20,BOLA2B,CXCL11,EZH2,CALR,MMP1,PMAIP1,BOLA2,CD86,HIST2H3D,SHMT2,NME1,EIF4EBP1,OAS2,IFI6,CTSL,E2F1,CTSB,FN1,BLM,CCL20,HIST1H3J,STAT1,IQGAP3,CXCL9,HDGF,LAMTOR2…
GO:0006954	Inflammatory response	32	515	0.45	3.21e-05	9606.ENSP00000216117,9606.ENSP00000250092,9606.ENSP00000259396,9606.ENSP00000261267,9606.ENSP00000261623,9606.ENSP00000262629,9606.ENSP00000264832,9606.ENSP00000265643,9606.ENSP00000286758,9606.ENSP00000289707,9606.ENSP00000289902,9606.ENSP00000292303,9606.ENSP00000296503,9606.ENSP00000301653,9606.ENSP00000302569,9606.ENSP00000305651,9606.ENSP00000306512,9606.ENSP00000306884,9606.ENSP00000341821,…	HMOX1,CD68,ORM1,LYZ,CYBA,TYROBP,ICAM1,GAL,CXCL13,SLAMF8,FCER1G,CCR5,HMGB2,KRT16,CLEC7A,CXCL10,CXCL8,CXCL11,FPR3,FN1,CCL20,CXCL9,S100A8,S100A9,GBP5,C1QA,CYBB,SDC1,SPP1,CXCR4,IDO1,ADAM8
GO:0002366	Leukocyte activation involved in immune response	36	626	0.42	3.39e-05	9606.ENSP00000219150,9606.ENSP00000236147,9606.ENSP00000236671,9606.ENSP00000250092,9606.ENSP00000259396,9606.ENSP00000260118,9606.ENSP00000261267,9606.ENSP00000261623,9606.ENSP00000262428,9606.ENSP00000262629,9606.ENSP00000264832,9606.ENSP00000271324,9606.ENSP00000271638,9606.ENSP00000289902,9606.ENSP00000291568,9606.ENSP00000296370,9606.ENSP00000339328,9606.ENSP00000345672,9606.ENSP00000354532,…	CORO1A,SELL,CTSD,CD68,ORM1,GGH,LYZ,CYBA,COTL1,TYROBP,ICAM1,CD53,S100A11,FCER1G,CSTB,S100P,PLAUR,CTSB,PNP,ILF2,EXO1,LAMTOR2,S100A7,S100A8,S100A9,CTSS,MMP9,PLAU,CYBB,PRDX4,CALML5,LCP1,HLA-B,PTPRC,CLEC5A,ADAM8
GO:0002684	Positive regulation of immune system process	47	949	0.35	3.44e-05	9606.ENSP00000216117,9606.ENSP00000216802,9606.ENSP00000219150,9606.ENSP00000226279,9606.ENSP00000242208,9606.ENSP00000262629,9606.ENSP00000264246,9606.ENSP00000264832,9606.ENSP00000274793,9606.ENSP00000286758,9606.ENSP00000289902,9606.ENSP00000296503,9606.ENSP00000300692,9606.ENSP00000302569,9606.ENSP00000303939,9606.ENSP00000305651,9606.ENSP00000306512,9606.ENSP00000313967,9606.ENSP00000319476,…	HMOX1,PSME2,CORO1A,CD38,INHBA,TYROBP,CD80,ICAM1,PLA2G7,CXCL13,FCER1G,HMGB2,CD3D,CLEC7A,CTLA4,CXCL10,CXCL8,C1QB,ICOS,CALR,CD86,FPR3,CCL20,STAT1,PNP,FCGR3A,S100A7,FCGR1A,CD2,HMGB3,GBP5,C1QA,PSMB9,HLA-DQA2,HLA-DQB1,ISG15,RSAD2,LILRB4,HLA-DRA,PPAPDC1A,HLA-DMB,HLA-B,PTPRC,FYB,IDO1,MS4A1,ADAM8
GO:0008284	Positive regulation of cell population proliferation	46	919	0.36	3.46e-05	9606.ENSP00000209728,9606.ENSP00000216117,9606.ENSP00000219150,9606.ENSP00000226279,9606.ENSP00000250160,9606.ENSP00000256442,9606.ENSP00000261623,9606.ENSP00000262643,9606.ENSP00000263735,9606.ENSP00000264246,9606.ENSP00000274026,9606.ENSP00000295746,9606.ENSP00000296503,9606.ENSP00000301633,9606.ENSP00000302569,9606.ENSP00000305651,9606.ENSP00000320147,9606.ENSP00000320866,9606.ENSP00000322568,…	CDC6,HMOX1,CORO1A,CD38,WISP1,CCNB1,CYBA,CCNE1,EPCAM,CD80,CCNA2,KIAA1524,HMGB2,BIRC5,CLEC7A,CXCL10,EZH2,CALR,SOX11,CTHRC1,CD86,SHMT2,NME1,FOXM1,E2F1,FN1,STAT1,IQGAP3,PNP,KIF14,ASPM,TTK,IRAK1,SLC25A5,MMP9,CDC20,MARCKSL1,RTKN2,ESM1,PRC1,CDK1,SAPCD2,CDC7,HLA-DMB,PTPRC,PRAME
GO:0006302	Double-strand break repair	19	204	0.63	3.59e-05	9606.ENSP00000166345,9606.ENSP00000228843,9606.ENSP00000262105,9606.ENSP00000264233,9606.ENSP00000265056,9606.ENSP00000275517,9606.ENSP00000305480,9606.ENSP00000318977,9606.ENSP00000347168,9606.ENSP00000347232,9606.ENSP00000361043,9606.ENSP00000366956,9606.ENSP00000367034,9606.ENSP00000372088,9606.ENSP00000386239,9606.ENSP00000393139,9606.ENSP00000405726,9606.ENSP00000434024,9606.ENSP00000482313	TRIP13,RAD51AP1,MCM4,POLQ,MCM2,CDCA5,FEN1,GEN1,HIST1H4J,BLM,RAD54L,HIST1H4H,HIST1H4C,RAD51,TONSL,CDC7,CDC45,H2AFX,RECQL4
GO:0050900	Leukocyte migration	24	316	0.54	3.6e-05	9606.ENSP00000219150,9606.ENSP00000236147,9606.ENSP00000261622,9606.ENSP00000263735,9606.ENSP00000264832,9606.ENSP00000286758,9606.ENSP00000289707,9606.ENSP00000289902,9606.ENSP00000292303,9606.ENSP00000305651,9606.ENSP00000306512,9606.ENSP00000306884,9606.ENSP00000322788,9606.ENSP00000346839,9606.ENSP00000351671,9606.ENSP00000354901,9606.ENSP00000357722,9606.ENSP00000357727,9606.ENSP00000358490,…	CORO1A,SELL,SLC7A5,EPCAM,ICAM1,CXCL13,SLAMF8,FCER1G,CCR5,CXCL10,CXCL8,CXCL11,MMP1,FN1,CCL20,CXCL9,S100A8,S100A9,CD2,SDC1,CXCR4,ADAM8,SLC16A3,CD48
GO:0001906	Cell killing	15	126	0.73	3.63e-05	9606.ENSP00000216341,9606.ENSP00000219150,9606.ENSP00000229239,9606.ENSP00000261267,9606.ENSP00000262746,9606.ENSP00000286758,9606.ENSP00000305651,9606.ENSP00000306512,9606.ENSP00000306884,9606.ENSP00000349430,9606.ENSP00000351671,9606.ENSP00000354901,9606.ENSP00000357022,9606.ENSP00000398803,9606.ENSP00000476136	GZMB,CORO1A,GAPDH,LYZ,PRDX1,CXCL13,CXCL10,CXCL8,CXCL11,HIST1H2BK,CCL20,CXCL9,SLAMF7,TSTA3,HIST1H2BJ
GO:0031055	Chromatin remodeling at centromere	10	48	0.98	3.64e-05	9606.ENSP00000281453,9606.ENSP00000335463,9606.ENSP00000336868,9606.ENSP00000347168,9606.ENSP00000357308,9606.ENSP00000366956,9606.ENSP00000367034,9606.ENSP00000377007,9606.ENSP00000377601,9606.ENSP00000414109	CENPU,CASC5,CENPA,HIST1H4J,CENPW,HIST1H4H,HIST1H4C,CENPN,HELLS,HJURP
GO:0071310	Cellular response to organic substance	89	2369	0.23	3.7e-05	9606.ENSP00000209728,9606.ENSP00000216117,9606.ENSP00000216802,9606.ENSP00000217026,9606.ENSP00000219150,9606.ENSP00000219919,9606.ENSP00000229239,9606.ENSP00000242208,9606.ENSP00000250092,9606.ENSP00000256442,9606.ENSP00000256722,9606.ENSP00000257570,9606.ENSP00000260102,9606.ENSP00000261366,9606.ENSP00000261623,9606.ENSP00000262643,9606.ENSP00000263181,9606.ENSP00000264246,9606.ENSP00000264832,…	CDC6,HMOX1,PSME2,MYBL2,CORO1A,AQP9,GAPDH,INHBA,CD68,CCNB1,CMPK2,OASL,MRPL15,LMNB1,CYBA,CCNE1,KIF18A,CD80,ICAM1,MCM2,CCNA2,CXCL13,FCER1G,CCR5,LAPTM5,H2AFZ,HMGB2,BIRC5,CLEC7A,LRP8,CXCL10,SHCBP1,CXCL8,ISG20,BOLA2B,CXCL11,EZH2,CALR,MMP1,BOLA2,CD86,HIST2H3D,SHMT2,NME1,EIF4EBP1,OAS2,IFI6,CTSL,E2F1,CTSB,FN1,BLM,CCL20,HIST1H3J,STAT1,IQGAP3,CXCL9,HDGF,LAMTOR2,CTSS,HIST2H3C,FCGR1A,IRAK1,GBP5,SLC25A5,MMP9,P…
GO:0000003	Reproduction	61	1403	0.3	4.05e-05	9606.ENSP00000166345,9606.ENSP00000216911,9606.ENSP00000226279,9606.ENSP00000240285,9606.ENSP00000240423,9606.ENSP00000240488,9606.ENSP00000242208,9606.ENSP00000244573,9606.ENSP00000256442,9606.ENSP00000257934,9606.ENSP00000262643,9606.ENSP00000263181,9606.ENSP00000263382,9606.ENSP00000263753,9606.ENSP00000264832,9606.ENSP00000270861,9606.ENSP00000271452,9606.ENSP00000280326,9606.ENSP00000287598,…	TRIP13,AURKA,CD38,RDH10,NCAPH,MND1,INHBA,HIST1H1A,CCNB1,ESPL1,CCNE1,KIF18A,ASF1B,SGOL1,ICAM1,PLK4,NUF2,CCT5,BUB1B,KIAA1524,POC1A,HMGB2,PLK1,BUB1,CBX2,CALR,E2F7,NCAPD2,LIN9,CASC5,E2F1,CTSB,SMC4,HORMAD1,EXO1,NEK2,ASPM,TTK,RAD54L,MMP9,SRPK1,CKS2,PCNA,PRDX4,SDC1,RAD51,GJB2,FANCA,PTTG1,INCENP,SPP1,CDK1,KIFC1,RACGAP1,TOP2A,CCNE2,MYBL1,IDO1,H2AFX,PAFAH1B3,E2F8
GO:0022411	Cellular component disassembly	27	395	0.49	4.58e-05	9606.ENSP00000215743,9606.ENSP00000229238,9606.ENSP00000256442,9606.ENSP00000260102,9606.ENSP00000263181,9606.ENSP00000288207,9606.ENSP00000296503,9606.ENSP00000300093,9606.ENSP00000306548,9606.ENSP00000313967,9606.ENSP00000322788,9606.ENSP00000345344,9606.ENSP00000355656,9606.ENSP00000357981,9606.ENSP00000361298,9606.ENSP00000361405,9606.ENSP00000363081,9606.ENSP00000363773,9606.ENSP00000378699,…	MMP11,MRPL51,CCNB1,MRPL15,KIF18A,CCNB2,HMGB2,PLK1,MRPL13,C1QB,MMP1,CTSL,HIST3H2A,CTSS,KIF2C,MMP9,DKK1,C1QA,CDK1,LCP1,MRPS12,HMGA1,STMN1,TOP2A,CDKN2A,ADAM8,KIF18B
GO:0070887	Cellular response to chemical stimulus	103	2919	0.21	6.34e-05	9606.ENSP00000209728,9606.ENSP00000216117,9606.ENSP00000216802,9606.ENSP00000217026,9606.ENSP00000219150,9606.ENSP00000219919,9606.ENSP00000229239,9606.ENSP00000242208,9606.ENSP00000250092,9606.ENSP00000256442,9606.ENSP00000256722,9606.ENSP00000257570,9606.ENSP00000260102,9606.ENSP00000261366,9606.ENSP00000261623,9606.ENSP00000262643,9606.ENSP00000262746,9606.ENSP00000263181,9606.ENSP00000264246,…	CDC6,HMOX1,PSME2,MYBL2,CORO1A,AQP9,GAPDH,INHBA,CD68,CCNB1,CMPK2,OASL,MRPL15,LMNB1,CYBA,CCNE1,PRDX1,KIF18A,CD80,ICAM1,MCM2,CCNA2,UCHL1,CXCL13,SLAMF8,FCER1G,CCR5,LAPTM5,H2AFZ,HMGB2,MELK,BIRC5,CLEC7A,LRP8,CXCL10,SHCBP1,CXCL8,ISG20,BOLA2B,CXCL11,EZH2,CALR,MMP1,PMAIP1,BOLA2,CD86,HIST2H3D,SHMT2,NME1,EIF4EBP1,OAS2,IFI6,CTSL,E2F1,CTSB,FN1,SUV39H2,BLM,CCL20,HIST1H3J,STAT1,IQGAP3,CXCL9,HDGF,LAMTOR2,S100A8,…
GO:0051171	Regulation of nitrogen compound metabolic process	176	5836	0.14	6.45e-05	9606.ENSP00000166345,9606.ENSP00000209728,9606.ENSP00000216117,9606.ENSP00000216341,9606.ENSP00000216802,9606.ENSP00000216911,9606.ENSP00000217026,9606.ENSP00000225655,9606.ENSP00000226279,9606.ENSP00000228843,9606.ENSP00000229239,9606.ENSP00000233893,9606.ENSP00000236671,9606.ENSP00000242208,9606.ENSP00000244534,9606.ENSP00000244573,9606.ENSP00000247191,9606.ENSP00000256442,9606.ENSP00000257570,…	TRIP13,CDC6,HMOX1,GZMB,PSME2,AURKA,MYBL2,PFN1,CD38,RAD51AP1,GAPDH,HSPE1,CTSD,INHBA,HIST1H1D,HIST1H1A,DLGAP5,CCNB1,OASL,ESPL1,THOC1,PKMYT1,CCNE1,PRDX1,EPCAM,POLQ,CD80,UBE2S,ICAM1,CENPE,PITX1,TFEC,GAL,DBF4,ARNTL2,CCNA2,GZMA,NFKBIE,PPP4C,CCT5,UCHL1,SAMSN1,ATAD2,CCNB2,CSTB,EN1,H2AFZ,HMGB2,MAD2L1,PLK1,TPX2,CD3D,BIRC5,CLEC7A,LRP8,CDC25A,CXCL10,CST1,MRPL13,CDCA7,HIST1H1E,CBX2,PPP1R14B,FANCI,CKS1B,CLSPN,…
GO:0006336	DNA replication-independent nucleosome assembly	10	53	0.93	7.78e-05	9606.ENSP00000263382,9606.ENSP00000281453,9606.ENSP00000335463,9606.ENSP00000336868,9606.ENSP00000347168,9606.ENSP00000357308,9606.ENSP00000366956,9606.ENSP00000367034,9606.ENSP00000377007,9606.ENSP00000414109	ASF1B,CENPU,CASC5,CENPA,HIST1H4J,CENPW,HIST1H4H,HIST1H4C,CENPN,HJURP
GO:0022414	Reproductive process	60	1400	0.29	7.84e-05	9606.ENSP00000166345,9606.ENSP00000216911,9606.ENSP00000226279,9606.ENSP00000240285,9606.ENSP00000240423,9606.ENSP00000240488,9606.ENSP00000242208,9606.ENSP00000244573,9606.ENSP00000256442,9606.ENSP00000257934,9606.ENSP00000262643,9606.ENSP00000263181,9606.ENSP00000263382,9606.ENSP00000263753,9606.ENSP00000264832,9606.ENSP00000270861,9606.ENSP00000271452,9606.ENSP00000280326,9606.ENSP00000287598,…	TRIP13,AURKA,CD38,RDH10,NCAPH,MND1,INHBA,HIST1H1A,CCNB1,ESPL1,CCNE1,KIF18A,ASF1B,SGOL1,ICAM1,PLK4,NUF2,CCT5,BUB1B,KIAA1524,POC1A,HMGB2,PLK1,BUB1,CBX2,CALR,E2F7,NCAPD2,CASC5,E2F1,CTSB,SMC4,HORMAD1,EXO1,NEK2,ASPM,TTK,RAD54L,MMP9,SRPK1,CKS2,PCNA,PRDX4,SDC1,RAD51,GJB2,FANCA,PTTG1,INCENP,SPP1,CDK1,KIFC1,RACGAP1,TOP2A,CCNE2,MYBL1,IDO1,H2AFX,PAFAH1B3,E2F8
GO:0031323	Regulation of cellular metabolic process	185	6239	0.13	8.23e-05	9606.ENSP00000166345,9606.ENSP00000209728,9606.ENSP00000216117,9606.ENSP00000216341,9606.ENSP00000216802,9606.ENSP00000216911,9606.ENSP00000217026,9606.ENSP00000225655,9606.ENSP00000226279,9606.ENSP00000228843,9606.ENSP00000229239,9606.ENSP00000233893,9606.ENSP00000236671,9606.ENSP00000240285,9606.ENSP00000242208,9606.ENSP00000244534,9606.ENSP00000244573,9606.ENSP00000247191,9606.ENSP00000256442,…	TRIP13,CDC6,HMOX1,GZMB,PSME2,AURKA,MYBL2,PFN1,CD38,RAD51AP1,GAPDH,HSPE1,CTSD,RDH10,INHBA,HIST1H1D,HIST1H1A,DLGAP5,CCNB1,OASL,ESPL1,THOC1,CYBA,PKMYT1,TYROBP,CCNE1,PRDX1,EPCAM,POLQ,CD80,UBE2S,ICAM1,CENPE,PITX1,TFEC,GAL,DBF4,ARNTL2,S100A11,CCNA2,GZMA,NFKBIE,PPP4C,CCT5,UCHL1,SAMSN1,ATAD2,CCNB2,SLAMF8,CSTB,EN1,H2AFZ,HMGB2,MAD2L1,PLK1,TPX2,CD3D,BIRC5,CLEC7A,LRP8,CDC25A,CXCL10,CST1,MRPL13,CDCA7,HIST1H1E…
GO:0031935	Regulation of chromatin silencing	7	19	1.23	8.23e-05	9606.ENSP00000244534,9606.ENSP00000244573,9606.ENSP00000287394,9606.ENSP00000307705,9606.ENSP00000330074,9606.ENSP00000399888,9606.ENSP00000405726	HIST1H1D,HIST1H1A,ATAD2,HIST1H1E,HIST1H1B,HMGA1,CDC45
GO:0060968	Regulation of gene silencing	15	137	0.7	8.85e-05	9606.ENSP00000244534,9606.ENSP00000244573,9606.ENSP00000287394,9606.ENSP00000307705,9606.ENSP00000330074,9606.ENSP00000333277,9606.ENSP00000347168,9606.ENSP00000352252,9606.ENSP00000358154,9606.ENSP00000366956,9606.ENSP00000366999,9606.ENSP00000367034,9606.ENSP00000385479,9606.ENSP00000399888,9606.ENSP00000405726	HIST1H1D,HIST1H1A,ATAD2,HIST1H1E,HIST1H1B,HIST2H3D,HIST1H4J,HIST1H3J,HIST2H3C,HIST1H4H,HIST1H3D,HIST1H4C,HIST2H3A,HMGA1,CDC45
GO:1903706	Regulation of hemopoiesis	30	493	0.44	0.0001	9606.ENSP00000216802,9606.ENSP00000242208,9606.ENSP00000262629,9606.ENSP00000264246,9606.ENSP00000289707,9606.ENSP00000296503,9606.ENSP00000303939,9606.ENSP00000332049,9606.ENSP00000333277,9606.ENSP00000337060,9606.ENSP00000344544,9606.ENSP00000347168,9606.ENSP00000352252,9606.ENSP00000354394,9606.ENSP00000354532,9606.ENSP00000358154,9606.ENSP00000358490,9606.ENSP00000359393,9606.ENSP00000363993,…	PSME2,INHBA,TYROBP,CD80,SLAMF8,HMGB2,CTLA4,CD86,HIST2H3D,NME1,IKZF3,HIST1H4J,HIST1H3J,STAT1,PNP,HIST2H3C,CD2,HMGB3,PSMB9,HIST1H4H,HIST1H3D,HIST1H4C,ISG15,FANCA,LILRB4,HIST2H3A,HLA-B,PTPRC,CDKN2A,ADAM8
GO:0034080	CENP-A containing nucleosome assembly	9	43	0.98	0.00012	9606.ENSP00000281453,9606.ENSP00000335463,9606.ENSP00000336868,9606.ENSP00000347168,9606.ENSP00000357308,9606.ENSP00000366956,9606.ENSP00000367034,9606.ENSP00000377007,9606.ENSP00000414109	CENPU,CASC5,CENPA,HIST1H4J,CENPW,HIST1H4H,HIST1H4C,CENPN,HJURP
GO:0044260	Cellular macromolecule metabolic process	154	4976	0.15	0.00012	9606.ENSP00000005286,9606.ENSP00000166345,9606.ENSP00000209728,9606.ENSP00000216802,9606.ENSP00000216911,9606.ENSP00000219097,9606.ENSP00000221486,9606.ENSP00000228843,9606.ENSP00000229238,9606.ENSP00000229239,9606.ENSP00000240488,9606.ENSP00000242208,9606.ENSP00000244534,9606.ENSP00000256442,9606.ENSP00000260102,9606.ENSP00000261267,9606.ENSP00000261600,9606.ENSP00000262105,9606.ENSP00000262300,…	TMEM132A,TRIP13,CDC6,PSME2,AURKA,ORC6,RNASEH2A,RAD51AP1,MRPL51,GAPDH,MND1,INHBA,HIST1H1D,CCNB1,MRPL15,LYZ,THOC1,MCM4,PKMYT1,CCNE1,POLQ,UBE2S,NEIL3,MCM2,DBF4,PLK4,SNRPG,CCNA2,GZMA,CDCA5,PPP4C,UCHL1,BUB1B,HIST1H2BD,FCER1G,CCR5,HMGB2,MAD2L1,MELK,KIAA0101,PLK1,BIRC5,TK1,BUB1,CDC25A,FEN1,CXCL8,MRPL13,ISG20,HIST1H1E,FANCI,TRIM59,CLSPN,MKRN3,AURKB,GEN1,EZH2,CDC25C,HIST1H2BC,DCTPP1,MMP1,PMAIP1,APOBEC3B,P…
GO:0051255	Spindle midzone assembly	6	12	1.36	0.00012	9606.ENSP00000260363,9606.ENSP00000313950,9606.ENSP00000363524,9606.ENSP00000377793,9606.ENSP00000378295,9606.ENSP00000404190	KIF23,AURKB,KIF4A,PRC1,INCENP,RACGAP1
GO:0008608	Attachment of spindle microtubules to kinetochore	7	21	1.18	0.00013	9606.ENSP00000261597,9606.ENSP00000263753,9606.ENSP00000265148,9606.ENSP00000271452,9606.ENSP00000313950,9606.ENSP00000335463,9606.ENSP00000361298	NDC80,SGOL1,CENPE,NUF2,AURKB,CASC5,KIF2C
GO:0010941	Regulation of cell death	68	1696	0.26	0.00013	9606.ENSP00000216117,9606.ENSP00000216341,9606.ENSP00000216911,9606.ENSP00000217026,9606.ENSP00000219150,9606.ENSP00000226279,9606.ENSP00000229239,9606.ENSP00000231009,9606.ENSP00000233893,9606.ENSP00000236671,9606.ENSP00000242208,9606.ENSP00000250160,9606.ENSP00000262629,9606.ENSP00000263735,9606.ENSP00000264832,9606.ENSP00000265643,9606.ENSP00000267953,9606.ENSP00000274306,9606.ENSP00000289902,…	HMOX1,GZMB,AURKA,MYBL2,CORO1A,CD38,GAPDH,GZMK,HSPE1,CTSD,INHBA,WISP1,TYROBP,EPCAM,ICAM1,GAL,BCL2A1,GZMA,FCER1G,CCR5,EN1,HMGB2,MAD2L1,MELK,PLK1,BIRC5,CLEC7A,LRP8,CTLA4,CXCL10,AURKB,CALR,SOX11,PMAIP1,NME1,PLAUR,IFI6,IKZF3,E2F1,CTSB,FN1,STAT1,KIF14,S100A8,S100A9,IRAK1,SLC25A5,STIL,MMP9,RTKN2,DKK1,C1QA,PIM2,UBD,MST4,CDK1,PYCR1,CXCR4,HTATIP2,PTPRC,TOP2A,CDKN2A,IDO1,MTRNR2L8,PRAME,CLEC5A,ADAM8,ANP32E
GO:0080090	Regulation of primary metabolic process	179	6032	0.13	0.00013	9606.ENSP00000166345,9606.ENSP00000209728,9606.ENSP00000216117,9606.ENSP00000216341,9606.ENSP00000216802,9606.ENSP00000216911,9606.ENSP00000217026,9606.ENSP00000225655,9606.ENSP00000226279,9606.ENSP00000228843,9606.ENSP00000229239,9606.ENSP00000233893,9606.ENSP00000236671,9606.ENSP00000240285,9606.ENSP00000242208,9606.ENSP00000244534,9606.ENSP00000244573,9606.ENSP00000247191,9606.ENSP00000256442,…	TRIP13,CDC6,HMOX1,GZMB,PSME2,AURKA,MYBL2,PFN1,CD38,RAD51AP1,GAPDH,HSPE1,CTSD,RDH10,INHBA,HIST1H1D,HIST1H1A,DLGAP5,CCNB1,OASL,ESPL1,THOC1,PKMYT1,CCNE1,PRDX1,EPCAM,POLQ,CD80,UBE2S,ICAM1,CENPE,PITX1,TFEC,GAL,DBF4,SQLE,ARNTL2,CCNA2,GZMA,NFKBIE,PPP4C,CCT5,UCHL1,SAMSN1,ATAD2,CCNB2,CSTB,EN1,H2AFZ,HMGB2,MAD2L1,PLK1,TPX2,CD3D,BIRC5,CLEC7A,LRP8,CDC25A,CXCL10,CST1,MRPL13,CDCA7,HIST1H1E,CBX2,PPP1R14B,FANCI,C…
GO:0000018	Regulation of dna recombination	13	106	0.75	0.00014	9606.ENSP00000228843,9606.ENSP00000244534,9606.ENSP00000244573,9606.ENSP00000261600,9606.ENSP00000264233,9606.ENSP00000279387,9606.ENSP00000307705,9606.ENSP00000330074,9606.ENSP00000347232,9606.ENSP00000372088,9606.ENSP00000411355,9606.ENSP00000438483,9606.ENSP00000450607	RAD51AP1,HIST1H1D,HIST1H1A,THOC1,POLQ,PPP4C,HIST1H1E,HIST1H1B,BLM,RAD51,PTPRC,KPNA2,TIMELESS
GO:0032200	Telomere organization	14	125	0.71	0.00015	9606.ENSP00000262643,9606.ENSP00000305480,9606.ENSP00000328174,9606.ENSP00000347168,9606.ENSP00000347232,9606.ENSP00000352252,9606.ENSP00000355506,9606.ENSP00000366956,9606.ENSP00000366999,9606.ENSP00000367034,9606.ENSP00000368458,9606.ENSP00000372088,9606.ENSP00000429089,9606.ENSP00000482313	CCNE1,FEN1,PIF1,HIST1H4J,BLM,HIST1H3J,EXO1,HIST1H4H,HIST1H3D,HIST1H4C,PCNA,RAD51,CCNE2,RECQL4
GO:0043067	Regulation of programmed cell death	64	1569	0.27	0.00015	9606.ENSP00000216117,9606.ENSP00000216341,9606.ENSP00000216911,9606.ENSP00000217026,9606.ENSP00000219150,9606.ENSP00000226279,9606.ENSP00000229239,9606.ENSP00000231009,9606.ENSP00000233893,9606.ENSP00000236671,9606.ENSP00000242208,9606.ENSP00000262629,9606.ENSP00000263735,9606.ENSP00000264832,9606.ENSP00000265643,9606.ENSP00000267953,9606.ENSP00000274306,9606.ENSP00000289902,9606.ENSP00000292303,…	HMOX1,GZMB,AURKA,MYBL2,CORO1A,CD38,GAPDH,GZMK,HSPE1,CTSD,INHBA,TYROBP,EPCAM,ICAM1,GAL,BCL2A1,GZMA,FCER1G,CCR5,EN1,HMGB2,MAD2L1,MELK,PLK1,BIRC5,CLEC7A,LRP8,CTLA4,CXCL10,AURKB,CALR,PMAIP1,NME1,PLAUR,IFI6,IKZF3,E2F1,CTSB,FN1,STAT1,KIF14,S100A8,S100A9,IRAK1,SLC25A5,STIL,MMP9,RTKN2,DKK1,PIM2,UBD,MST4,CDK1,CXCR4,HTATIP2,PTPRC,TOP2A,CDKN2A,IDO1,MTRNR2L8,PRAME,CLEC5A,ADAM8,ANP32E
GO:0010604	Positive regulation of macromolecule metabolic process	119	3600	0.18	0.00016	9606.ENSP00000209728,9606.ENSP00000216117,9606.ENSP00000216802,9606.ENSP00000216911,9606.ENSP00000217026,9606.ENSP00000226279,9606.ENSP00000229239,9606.ENSP00000233893,9606.ENSP00000236671,9606.ENSP00000242208,9606.ENSP00000244534,9606.ENSP00000244573,9606.ENSP00000247191,9606.ENSP00000256442,9606.ENSP00000257934,9606.ENSP00000259396,9606.ENSP00000261600,9606.ENSP00000261623,9606.ENSP00000262629,…	CDC6,HMOX1,PSME2,AURKA,MYBL2,CD38,GAPDH,HSPE1,CTSD,INHBA,HIST1H1D,HIST1H1A,DLGAP5,CCNB1,ESPL1,ORM1,THOC1,CYBA,TYROBP,CCNE1,EPCAM,CD80,UBE2S,ICAM1,CENPE,PITX1,TFEC,GAL,DBF4,ARNTL2,CCNA2,CCT5,ATAD2,FCER1G,EN1,H2AFZ,HMGB2,PLK1,TPX2,CD3D,CLEC7A,LRP8,CXCL10,HIST1H1E,FANCI,CKS1B,CLSPN,AURKB,MARCO,EZH2,CALR,SOX11,E2F7,PMAIP1,CDCA2,HIST1H1B,CD86,PLAUR,FOXM1,IKZF3,E2F1,FN1,BLM,UBE2C,LAGE3,CCL20,STAT1,IQGA…
GO:0043170	Macromolecule metabolic process	181	6137	0.13	0.00016	9606.ENSP00000005286,9606.ENSP00000166345,9606.ENSP00000209728,9606.ENSP00000215743,9606.ENSP00000216341,9606.ENSP00000216802,9606.ENSP00000216911,9606.ENSP00000219097,9606.ENSP00000221486,9606.ENSP00000228843,9606.ENSP00000229238,9606.ENSP00000229239,9606.ENSP00000231009,9606.ENSP00000236671,9606.ENSP00000240488,9606.ENSP00000242208,9606.ENSP00000242776,9606.ENSP00000244534,9606.ENSP00000256412,…	TMEM132A,TRIP13,CDC6,MMP11,GZMB,PSME2,AURKA,ORC6,RNASEH2A,RAD51AP1,MRPL51,GAPDH,GZMK,CTSD,MND1,INHBA,DDX39A,HIST1H1D,ADAMDEC1,CCNB1,ESPL1,MRPL15,GGH,LYZ,THOC1,MCM4,PKMYT1,CCNE1,POLQ,UBE2S,NEIL3,MCM2,DBF4,PLK4,SNRPG,CCNA2,GZMA,CDCA5,PPP4C,UCHL1,BUB1B,HIST1H2BD,FCER1G,CCR5,HMGB2,MAD2L1,MELK,KIAA0101,PLK1,BIRC5,TK1,BUB1,LRP8,CDC25A,FEN1,CXCL8,MRPL13,ISG20,BOLA2B,HIST1H1E,FANCI,TRIM59,CLSPN,MKRN3,AUR…
GO:0043486	Histone exchange	10	59	0.89	0.00017	9606.ENSP00000281453,9606.ENSP00000335463,9606.ENSP00000336868,9606.ENSP00000347168,9606.ENSP00000357308,9606.ENSP00000366956,9606.ENSP00000367034,9606.ENSP00000377007,9606.ENSP00000414109,9606.ENSP00000463154	CENPU,CASC5,CENPA,HIST1H4J,CENPW,HIST1H4H,HIST1H4C,CENPN,HJURP,ANP32E
GO:0044774	Mitotic dna integrity checkpoint	13	109	0.74	0.00018	9606.ENSP00000209728,9606.ENSP00000216911,9606.ENSP00000256442,9606.ENSP00000312995,9606.ENSP00000321656,9606.ENSP00000323246,9606.ENSP00000345571,9606.ENSP00000347232,9606.ENSP00000360623,9606.ENSP00000368458,9606.ENSP00000378699,9606.ENSP00000411532,9606.ENSP00000481103	CDC6,AURKA,CCNB1,CLSPN,CDC25C,E2F7,E2F1,BLM,ORC1,PCNA,CDK1,TOP2A,E2F8
GO:0042981	Regulation of apoptotic process	63	1550	0.27	0.0002	9606.ENSP00000216117,9606.ENSP00000216341,9606.ENSP00000216911,9606.ENSP00000217026,9606.ENSP00000219150,9606.ENSP00000226279,9606.ENSP00000229239,9606.ENSP00000231009,9606.ENSP00000233893,9606.ENSP00000236671,9606.ENSP00000242208,9606.ENSP00000262629,9606.ENSP00000263735,9606.ENSP00000264832,9606.ENSP00000265643,9606.ENSP00000267953,9606.ENSP00000274306,9606.ENSP00000289902,9606.ENSP00000292303,…	HMOX1,GZMB,AURKA,MYBL2,CORO1A,CD38,GAPDH,GZMK,HSPE1,CTSD,INHBA,TYROBP,EPCAM,ICAM1,GAL,BCL2A1,GZMA,FCER1G,CCR5,EN1,HMGB2,MAD2L1,MELK,PLK1,BIRC5,CLEC7A,LRP8,CTLA4,CXCL10,AURKB,CALR,PMAIP1,NME1,PLAUR,IFI6,IKZF3,E2F1,CTSB,FN1,STAT1,KIF14,S100A8,S100A9,IRAK1,SLC25A5,STIL,MMP9,RTKN2,DKK1,PIM2,UBD,MST4,CDK1,HTATIP2,PTPRC,TOP2A,CDKN2A,IDO1,MTRNR2L8,PRAME,CLEC5A,ADAM8,ANP32E
GO:0072395	Signal transduction involved in cell cycle checkpoint	11	76	0.82	0.0002	9606.ENSP00000216911,9606.ENSP00000256442,9606.ENSP00000300093,9606.ENSP00000321656,9606.ENSP00000322568,9606.ENSP00000323246,9606.ENSP00000345571,9606.ENSP00000355958,9606.ENSP00000368458,9606.ENSP00000378699,9606.ENSP00000481103	AURKA,CCNB1,PLK1,CDC25C,SOX11,E2F7,E2F1,DTL,PCNA,CDK1,E2F8
GO:0031936	Negative regulation of chromatin silencing	6	14	1.29	0.00023	9606.ENSP00000244534,9606.ENSP00000244573,9606.ENSP00000287394,9606.ENSP00000307705,9606.ENSP00000330074,9606.ENSP00000399888	HIST1H1D,HIST1H1A,ATAD2,HIST1H1E,HIST1H1B,HMGA1
GO:0070507	Regulation of microtubule cytoskeleton organization	17	192	0.61	0.00023	9606.ENSP00000216911,9606.ENSP00000260731,9606.ENSP00000263181,9606.ENSP00000270861,9606.ENSP00000296484,9606.ENSP00000300093,9606.ENSP00000300403,9606.ENSP00000318977,9606.ENSP00000319417,9606.ENSP00000323300,9606.ENSP00000326550,9606.ENSP00000355966,9606.ENSP00000358925,9606.ENSP00000360944,9606.ENSP00000362937,9606.ENSP00000367276,9606.ENSP00000410452	AURKA,KIF11,KIF18A,PLK4,POC1A,PLK1,TPX2,GEN1,SKA3,SPAG5,TACC3,NEK2,PSRC1,STIL,RCC1,CKAP2,STMN1
GO:0000083	Regulation of transcription involved in g1/s transition of mitotic cell cycle	8	35	1.02	0.00025	9606.ENSP00000209728,9606.ENSP00000262643,9606.ENSP00000323246,9606.ENSP00000345571,9606.ENSP00000353770,9606.ENSP00000360623,9606.ENSP00000368458,9606.ENSP00000405726	CDC6,CCNE1,E2F7,E2F1,RRM2,ORC1,PCNA,CDC45
GO:0061844	Antimicrobial humoral immune response mediated by antimicrobial peptide	13	113	0.72	0.00026	9606.ENSP00000229239,9606.ENSP00000286758,9606.ENSP00000305651,9606.ENSP00000306512,9606.ENSP00000306884,9606.ENSP00000321744,9606.ENSP00000349430,9606.ENSP00000351671,9606.ENSP00000354901,9606.ENSP00000357712,9606.ENSP00000357727,9606.ENSP00000358151,9606.ENSP00000476136	GAPDH,CXCL13,CXCL10,CXCL8,CXCL11,HIST1H2BC,HIST1H2BK,CCL20,CXCL9,S100A7,S100A9,HIST2H2BE,HIST1H2BJ
GO:0071900	Regulation of protein serine/threonine kinase activity	30	521	0.42	0.00026	9606.ENSP00000209728,9606.ENSP00000256442,9606.ENSP00000262300,9606.ENSP00000262643,9606.ENSP00000265728,9606.ENSP00000274026,9606.ENSP00000284440,9606.ENSP00000288207,9606.ENSP00000300093,9606.ENSP00000303706,9606.ENSP00000305651,9606.ENSP00000311083,9606.ENSP00000320147,9606.ENSP00000321656,9606.ENSP00000335357,9606.ENSP00000347232,9606.ENSP00000354451,9606.ENSP00000357288,9606.ENSP00000358925,…	CDC6,CCNB1,PKMYT1,CCNE1,DBF4,CCNA2,UCHL1,CCNB2,PLK1,CDC25A,CXCL10,CKS1B,EZH2,CDC25C,CDKN3,BLM,IQGAP3,LAMTOR2,PSRC1,IRAK1,DKK1,CKS2,INCENP,CDK1,CXCR4,PTPRC,CDKN2A,PBK,CCNE2,ADAM8
GO:0051338	Regulation of transferase activity	47	1036	0.32	0.00028	9606.ENSP00000209728,9606.ENSP00000256442,9606.ENSP00000262300,9606.ENSP00000262643,9606.ENSP00000264552,9606.ENSP00000265148,9606.ENSP00000265728,9606.ENSP00000274026,9606.ENSP00000284440,9606.ENSP00000288207,9606.ENSP00000289707,9606.ENSP00000296509,9606.ENSP00000300093,9606.ENSP00000300403,9606.ENSP00000303634,9606.ENSP00000303706,9606.ENSP00000305651,9606.ENSP00000311083,9606.ENSP00000312995,…	CDC6,CCNB1,PKMYT1,CCNE1,UBE2S,CENPE,DBF4,CCNA2,UCHL1,CCNB2,SLAMF8,MAD2L1,PLK1,TPX2,LRP8,CDC25A,CXCL10,CKS1B,CLSPN,AURKB,EZH2,CDC25C,PIF1,CD86,CDKN3,BLM,UBE2C,IQGAP3,NEK2,KIF14,LAMTOR2,FCGR1A,PSRC1,IRAK1,CDC20,DKK1,CKS2,PCNA,MST4,INCENP,CDK1,CXCR4,PTPRC,CDKN2A,PBK,CCNE2,ADAM8
GO:0000086	G2/M transition of mitotic cell cycle	14	134	0.68	0.0003	9606.ENSP00000216911,9606.ENSP00000256442,9606.ENSP00000262300,9606.ENSP00000270861,9606.ENSP00000274026,9606.ENSP00000288207,9606.ENSP00000298048,9606.ENSP00000300093,9606.ENSP00000301633,9606.ENSP00000303706,9606.ENSP00000321656,9606.ENSP00000342307,9606.ENSP00000355966,9606.ENSP00000378699	AURKA,CCNB1,PKMYT1,PLK4,CCNA2,CCNB2,MELK,PLK1,BIRC5,CDC25A,CDC25C,FOXM1,NEK2,CDK1
GO:0006268	DNA unwinding involved in DNA replication	6	15	1.26	0.0003	9606.ENSP00000262105,9606.ENSP00000265056,9606.ENSP00000347232,9606.ENSP00000372088,9606.ENSP00000399888,9606.ENSP00000482313	MCM4,MCM2,BLM,RAD51,HMGA1,RECQL4
GO:0042590	Antigen processing and presentation of exogenous peptide antigen via mhc class i	11	80	0.8	0.00031	9606.ENSP00000216802,9606.ENSP00000261623,9606.ENSP00000289902,9606.ENSP00000320866,9606.ENSP00000346206,9606.ENSP00000358165,9606.ENSP00000363993,9606.ENSP00000364034,9606.ENSP00000367851,9606.ENSP00000384886,9606.ENSP00000399168	PSME2,CYBA,FCER1G,CALR,TAP1,FCGR1A,PSMB9,TAP2,CYBB,IFI30,HLA-B
GO:0000183	rDNA heterochromatin assembly	8	37	0.99	0.00035	9606.ENSP00000333277,9606.ENSP00000347168,9606.ENSP00000352252,9606.ENSP00000358154,9606.ENSP00000366956,9606.ENSP00000366999,9606.ENSP00000367034,9606.ENSP00000385479	HIST2H3D,HIST1H4J,HIST1H3J,HIST2H3C,HIST1H4H,HIST1H3D,HIST1H4C,HIST2H3A
GO:0051256	Mitotic spindle midzone assembly	5	8	1.45	0.00038	9606.ENSP00000260363,9606.ENSP00000313950,9606.ENSP00000363524,9606.ENSP00000377793,9606.ENSP00000404190	KIF23,AURKB,KIF4A,PRC1,RACGAP1
GO:0007076	Mitotic chromosome condensation	6	16	1.23	0.0004	9606.ENSP00000240423,9606.ENSP00000251496,9606.ENSP00000275517,9606.ENSP00000325017,9606.ENSP00000349961,9606.ENSP00000453403	NCAPH,NCAPG,CDCA5,NCAPD2,SMC4,NUSAP1
GO:0019730	Antimicrobial humoral response	15	160	0.63	0.00044	9606.ENSP00000229239,9606.ENSP00000261267,9606.ENSP00000286758,9606.ENSP00000305651,9606.ENSP00000306512,9606.ENSP00000306884,9606.ENSP00000321744,9606.ENSP00000349430,9606.ENSP00000351671,9606.ENSP00000354901,9606.ENSP00000357712,9606.ENSP00000357722,9606.ENSP00000357727,9606.ENSP00000358151,9606.ENSP00000476136	GAPDH,LYZ,CXCL13,CXCL10,CXCL8,CXCL11,HIST1H2BC,HIST1H2BK,CCL20,CXCL9,S100A7,S100A8,S100A9,HIST2H2BE,HIST1H2BJ
GO:0006959	Humoral immune response	20	275	0.52	0.00049	9606.ENSP00000229239,9606.ENSP00000261267,9606.ENSP00000286758,9606.ENSP00000305651,9606.ENSP00000306512,9606.ENSP00000306884,9606.ENSP00000313967,9606.ENSP00000321744,9606.ENSP00000349430,9606.ENSP00000351671,9606.ENSP00000354901,9606.ENSP00000355506,9606.ENSP00000357712,9606.ENSP00000357722,9606.ENSP00000357727,9606.ENSP00000358151,9606.ENSP00000363773,9606.ENSP00000364080,9606.ENSP00000433277,…	GAPDH,LYZ,CXCL13,CXCL10,CXCL8,CXCL11,C1QB,HIST1H2BC,HIST1H2BK,CCL20,CXCL9,EXO1,S100A7,S100A8,S100A9,HIST2H2BE,C1QA,HLA-DQB1,MS4A1,HIST1H2BJ
GO:0009893	Positive regulation of metabolic process	124	3893	0.16	0.00049	9606.ENSP00000209728,9606.ENSP00000216117,9606.ENSP00000216802,9606.ENSP00000216911,9606.ENSP00000217026,9606.ENSP00000226279,9606.ENSP00000229239,9606.ENSP00000233893,9606.ENSP00000236671,9606.ENSP00000240285,9606.ENSP00000242208,9606.ENSP00000244534,9606.ENSP00000244573,9606.ENSP00000247191,9606.ENSP00000256442,9606.ENSP00000257934,9606.ENSP00000259396,9606.ENSP00000261600,9606.ENSP00000261623,…	CDC6,HMOX1,PSME2,AURKA,MYBL2,CD38,GAPDH,HSPE1,CTSD,RDH10,INHBA,HIST1H1D,HIST1H1A,DLGAP5,CCNB1,ESPL1,ORM1,THOC1,CYBA,TYROBP,CCNE1,EPCAM,CD80,UBE2S,ICAM1,CENPE,PITX1,TFEC,GAL,DBF4,ARNTL2,CCNA2,CCT5,ATAD2,FCER1G,EN1,H2AFZ,HMGB2,PLK1,TPX2,CD3D,CLEC7A,LRP8,CXCL10,HIST1H1E,FANCI,CKS1B,CLSPN,AURKB,MARCO,EZH2,CALR,SOX11,E2F7,PMAIP1,CDCA2,HIST1H1B,CD86,PLAUR,FOXM1,IKZF3,E2F1,FN1,BLM,UBE2C,LAGE3,CCL20,STAT…
GO:0051782	Negative regulation of cell division	6	17	1.21	0.00052	9606.ENSP00000219097,9606.ENSP00000313950,9606.ENSP00000323246,9606.ENSP00000347232,9606.ENSP00000356379,9606.ENSP00000481103	ORC6,AURKB,E2F7,BLM,ASPM,E2F8
GO:0030595	Leukocyte chemotaxis	14	142	0.65	0.00053	9606.ENSP00000219150,9606.ENSP00000286758,9606.ENSP00000289707,9606.ENSP00000289902,9606.ENSP00000292303,9606.ENSP00000305651,9606.ENSP00000306512,9606.ENSP00000306884,9606.ENSP00000351671,9606.ENSP00000354901,9606.ENSP00000357722,9606.ENSP00000357727,9606.ENSP00000386884,9606.ENSP00000453302	CORO1A,CXCL13,SLAMF8,FCER1G,CCR5,CXCL10,CXCL8,CXCL11,CCL20,CXCL9,S100A8,S100A9,CXCR4,ADAM8
GO:0006342	Chromatin silencing	9	54	0.88	0.00056	9606.ENSP00000296417,9606.ENSP00000320147,9606.ENSP00000332790,9606.ENSP00000341094,9606.ENSP00000351589,9606.ENSP00000352119,9606.ENSP00000355656,9606.ENSP00000358155,9606.ENSP00000434024	H2AFZ,EZH2,HIST2H2AB,HIST1H2AD,HIST1H2AI,HIST1H2AG,HIST3H2A,HIST2H2AA,H2AFX
GO:0060333	Interferon-gamma-mediated signaling pathway	10	70	0.81	0.00059	9606.ENSP00000257570,9606.ENSP00000264832,9606.ENSP00000342278,9606.ENSP00000354394,9606.ENSP00000358165,9606.ENSP00000364076,9606.ENSP00000364080,9606.ENSP00000378786,9606.ENSP00000384886,9606.ENSP00000399168	OASL,ICAM1,OAS2,STAT1,FCGR1A,HLA-DQA2,HLA-DQB1,HLA-DRA,IFI30,HLA-B
GO:0045005	DNA-dependent DNA replication maintenance of fidelity	8	41	0.95	0.00064	9606.ENSP00000261600,9606.ENSP00000318977,9606.ENSP00000347232,9606.ENSP00000368458,9606.ENSP00000372088,9606.ENSP00000386239,9606.ENSP00000440402,9606.ENSP00000450607	THOC1,GEN1,BLM,PCNA,RAD51,TONSL,DDX11,TIMELESS
GO:0051656	Establishment of organelle localization	24	385	0.45	0.00069	9606.ENSP00000247191,9606.ENSP00000256442,9606.ENSP00000257934,9606.ENSP00000260363,9606.ENSP00000261597,9606.ENSP00000263181,9606.ENSP00000265148,9606.ENSP00000271452,9606.ENSP00000275517,9606.ENSP00000284440,9606.ENSP00000296509,9606.ENSP00000300093,9606.ENSP00000301633,9606.ENSP00000336868,9606.ENSP00000355922,9606.ENSP00000356319,9606.ENSP00000358925,9606.ENSP00000361298,9606.ENSP00000362146,…	DLGAP5,CCNB1,ESPL1,KIF23,NDC80,KIF18A,CENPE,NUF2,CDCA5,UCHL1,MAD2L1,PLK1,BIRC5,CENPA,CENPF,KIF14,PSRC1,KIF2C,CDCA8,INCENP,SAPCD2,KIFC1,NUSAP1,FAM83D
GO:0034340	Response to type i interferon	10	72	0.8	0.00072	9606.ENSP00000257570,9606.ENSP00000306565,9606.ENSP00000333667,9606.ENSP00000342278,9606.ENSP00000342513,9606.ENSP00000354394,9606.ENSP00000358997,9606.ENSP00000368699,9606.ENSP00000371471,9606.ENSP00000399168	OASL,ISG20,SHMT2,OAS2,IFI6,STAT1,IRAK1,ISG15,RSAD2,HLA-B
GO:0051052	Regulation of dna metabolic process	23	360	0.46	0.00072	9606.ENSP00000228843,9606.ENSP00000244534,9606.ENSP00000244573,9606.ENSP00000261600,9606.ENSP00000264233,9606.ENSP00000274306,9606.ENSP00000279387,9606.ENSP00000280326,9606.ENSP00000307705,9606.ENSP00000313950,9606.ENSP00000328174,9606.ENSP00000330074,9606.ENSP00000342307,9606.ENSP00000347232,9606.ENSP00000355966,9606.ENSP00000368458,9606.ENSP00000372088,9606.ENSP00000411355,9606.ENSP00000418915,…	RAD51AP1,HIST1H1D,HIST1H1A,THOC1,POLQ,GZMA,PPP4C,CCT5,HIST1H1E,AURKB,PIF1,HIST1H1B,FOXM1,BLM,NEK2,PCNA,RAD51,PTPRC,CDKN2A,H2AFX,KPNA2,DDX11,TIMELESS
GO:0007062	Sister chromatid cohesion	8	42	0.94	0.00074	9606.ENSP00000263753,9606.ENSP00000275517,9606.ENSP00000287598,9606.ENSP00000300093,9606.ENSP00000302530,9606.ENSP00000355167,9606.ENSP00000361540,9606.ENSP00000440402	SGOL1,CDCA5,BUB1B,PLK1,BUB1,HORMAD1,CDC20,DDX11
GO:0031327	Negative regulation of cellular biosynthetic process	62	1592	0.25	0.00079	9606.ENSP00000209728,9606.ENSP00000216341,9606.ENSP00000226279,9606.ENSP00000229239,9606.ENSP00000244534,9606.ENSP00000262643,9606.ENSP00000265340,9606.ENSP00000265440,9606.ENSP00000271638,9606.ENSP00000295206,9606.ENSP00000296417,9606.ENSP00000296503,9606.ENSP00000300093,9606.ENSP00000301633,9606.ENSP00000306548,9606.ENSP00000307705,9606.ENSP00000308750,9606.ENSP00000313950,9606.ENSP00000320147,…	CDC6,GZMB,CD38,GAPDH,HIST1H1D,CCNE1,PITX1,TFEC,S100A11,EN1,H2AFZ,HMGB2,PLK1,BIRC5,MRPL13,HIST1H1E,CBX2,AURKB,EZH2,CALR,SOX11,E2F7,PIF1,HIST1H1B,HIST2H2AB,HIST2H3D,EIF4EBP1,HIST1H2AD,ETV7,FOXM1,E2F1,SUV39H2,HIST1H4J,BLM,HIST1H2AI,HIST1H2AG,HIST1H3J,STAT1,E2F2,HIST3H2A,CENPF,HDGF,HIST2H3C,HIST2H2AA,DKK1,HIST1H4H,HIST1H3D,HIST1H4C,PCNA,LILRB4,HELLS,HIST2H3A,TONSL,HMGA1,DEPDC1,CDKN2A,H2AFX,PRAME,TIME…
GO:0051249	Regulation of lymphocyte activation	26	445	0.43	0.00085	9606.ENSP00000219150,9606.ENSP00000226279,9606.ENSP00000242208,9606.ENSP00000261600,9606.ENSP00000262629,9606.ENSP00000264246,9606.ENSP00000265643,9606.ENSP00000285670,9606.ENSP00000289707,9606.ENSP00000302569,9606.ENSP00000303939,9606.ENSP00000319476,9606.ENSP00000322568,9606.ENSP00000332049,9606.ENSP00000344544,9606.ENSP00000354532,9606.ENSP00000358490,9606.ENSP00000359393,9606.ENSP00000373952,…	CORO1A,CD38,INHBA,THOC1,TYROBP,CD80,GAL,SAMSN1,SLAMF8,CLEC7A,CTLA4,ICOS,SOX11,CD86,IKZF3,PNP,CD2,HMGB3,FANCA,LILRB4,HLA-DMB,PTPRC,CDKN2A,TIGIT,IDO1,ADAM8
GO:0050776	Regulation of immune response	41	896	0.32	0.00092	9606.ENSP00000216117,9606.ENSP00000216802,9606.ENSP00000226279,9606.ENSP00000236147,9606.ENSP00000261600,9606.ENSP00000262629,9606.ENSP00000264246,9606.ENSP00000264832,9606.ENSP00000285670,9606.ENSP00000286758,9606.ENSP00000289707,9606.ENSP00000289902,9606.ENSP00000296503,9606.ENSP00000300692,9606.ENSP00000303634,9606.ENSP00000303939,9606.ENSP00000313967,9606.ENSP00000332049,9606.ENSP00000341821,…	HMOX1,PSME2,CD38,SELL,THOC1,TYROBP,CD80,ICAM1,SAMSN1,CXCL13,SLAMF8,FCER1G,HMGB2,CD3D,LRP8,CTLA4,C1QB,CD86,FPR3,STAT1,FCGR3A,SLAMF7,FCGR1A,HMGB3,GBP5,C1QA,PSMB9,HLA-DQA2,HLA-DQB1,RSAD2,LILRB4,HLA-DRA,PPAPDC1A,HLA-DMB,HLA-B,PTPRC,FYB,IDO1,MS4A1,ADAM8,CD48
GO:0044403	Symbiotic process	40	865	0.32	0.00093	9606.ENSP00000229239,9606.ENSP00000261600,9606.ENSP00000264246,9606.ENSP00000264832,9606.ENSP00000274026,9606.ENSP00000281453,9606.ENSP00000292303,9606.ENSP00000302530,9606.ENSP00000321656,9606.ENSP00000322788,9606.ENSP00000332049,9606.ENSP00000336868,9606.ENSP00000345571,9606.ENSP00000345672,9606.ENSP00000346206,9606.ENSP00000346839,9606.ENSP00000354394,9606.ENSP00000358997,9606.ENSP00000360671,…	GAPDH,THOC1,CD80,ICAM1,CCNA2,CENPU,CCR5,BUB1,CDC25C,MMP1,CD86,CENPA,E2F1,CTSB,TAP1,FN1,STAT1,IRAK1,SLC25A5,SRPK1,RCC1,C1QA,PSMB9,TAP2,PCNA,ISG15,RSAD2,CDK1,HLA-DRA,CXCR4,HTATIP2,HLA-B,HMGA1,PTPRC,LRRC15,H2AFX,SLC52A2,KPNA2,DDX11,CLEC5A
GO:0010558	Negative regulation of macromolecule biosynthetic process	60	1534	0.25	0.00097	9606.ENSP00000209728,9606.ENSP00000216341,9606.ENSP00000226279,9606.ENSP00000229239,9606.ENSP00000244534,9606.ENSP00000262643,9606.ENSP00000265340,9606.ENSP00000265440,9606.ENSP00000271638,9606.ENSP00000295206,9606.ENSP00000296417,9606.ENSP00000296503,9606.ENSP00000300093,9606.ENSP00000301633,9606.ENSP00000306548,9606.ENSP00000307705,9606.ENSP00000308750,9606.ENSP00000313950,9606.ENSP00000320147,…	CDC6,GZMB,CD38,GAPDH,HIST1H1D,CCNE1,PITX1,TFEC,S100A11,EN1,H2AFZ,HMGB2,PLK1,BIRC5,MRPL13,HIST1H1E,CBX2,AURKB,EZH2,CALR,SOX11,E2F7,PIF1,HIST1H1B,HIST2H2AB,HIST2H3D,EIF4EBP1,HIST1H2AD,ETV7,FOXM1,E2F1,SUV39H2,HIST1H4J,BLM,HIST1H2AI,HIST1H2AG,HIST1H3J,STAT1,E2F2,HIST3H2A,CENPF,HDGF,HIST2H3C,HIST2H2AA,DKK1,HIST1H4H,HIST1H3D,HIST1H4C,PCNA,LILRB4,HELLS,HIST2H3A,TONSL,HMGA1,DEPDC1,CDKN2A,H2AFX,PRAME,TIME…
GO:0072422	Signal transduction involved in dna damage checkpoint	10	75	0.78	0.00097	9606.ENSP00000216911,9606.ENSP00000256442,9606.ENSP00000300093,9606.ENSP00000321656,9606.ENSP00000323246,9606.ENSP00000345571,9606.ENSP00000355958,9606.ENSP00000368458,9606.ENSP00000378699,9606.ENSP00000481103	AURKA,CCNB1,PLK1,CDC25C,E2F7,E2F1,DTL,PCNA,CDK1,E2F8
GO:0000723	Telomere maintenance	12	112	0.69	0.001	9606.ENSP00000262643,9606.ENSP00000305480,9606.ENSP00000328174,9606.ENSP00000347168,9606.ENSP00000347232,9606.ENSP00000355506,9606.ENSP00000366956,9606.ENSP00000367034,9606.ENSP00000368458,9606.ENSP00000372088,9606.ENSP00000429089,9606.ENSP00000482313	CCNE1,FEN1,PIF1,HIST1H4J,BLM,EXO1,HIST1H4H,HIST1H4C,PCNA,RAD51,CCNE2,RECQL4
GO:0002250	Adaptive immune response	21	317	0.48	0.001	9606.ENSP00000264832,9606.ENSP00000286758,9606.ENSP00000289902,9606.ENSP00000300692,9606.ENSP00000303939,9606.ENSP00000313967,9606.ENSP00000332049,9606.ENSP00000345344,9606.ENSP00000346206,9606.ENSP00000355506,9606.ENSP00000357022,9606.ENSP00000357981,9606.ENSP00000363773,9606.ENSP00000364034,9606.ENSP00000364076,9606.ENSP00000364080,9606.ENSP00000375616,9606.ENSP00000378786,9606.ENSP00000398803,…	ICAM1,CXCL13,FCER1G,CD3D,CTLA4,C1QB,CD86,CTSL,TAP1,EXO1,SLAMF7,CTSS,C1QA,TAP2,HLA-DQA2,HLA-DQB1,LILRB4,HLA-DRA,TSTA3,HLA-DMB,HLA-B
GO:0016032	Viral process	37	776	0.34	0.001	9606.ENSP00000264246,9606.ENSP00000264832,9606.ENSP00000274026,9606.ENSP00000281453,9606.ENSP00000292303,9606.ENSP00000302530,9606.ENSP00000321656,9606.ENSP00000322788,9606.ENSP00000332049,9606.ENSP00000336868,9606.ENSP00000345571,9606.ENSP00000345672,9606.ENSP00000346206,9606.ENSP00000354394,9606.ENSP00000358997,9606.ENSP00000360671,9606.ENSP00000362931,9606.ENSP00000362937,9606.ENSP00000363773,…	CD80,ICAM1,CCNA2,CENPU,CCR5,BUB1,CDC25C,MMP1,CD86,CENPA,E2F1,CTSB,TAP1,STAT1,IRAK1,SLC25A5,SRPK1,RCC1,C1QA,PSMB9,TAP2,PCNA,ISG15,RSAD2,CDK1,HLA-DRA,CXCR4,HTATIP2,HLA-B,HMGA1,PTPRC,LRRC15,H2AFX,SLC52A2,KPNA2,DDX11,CLEC5A
GO:2000113	Negative regulation of cellular macromolecule biosynthetic process	58	1470	0.26	0.001	9606.ENSP00000209728,9606.ENSP00000216341,9606.ENSP00000226279,9606.ENSP00000229239,9606.ENSP00000244534,9606.ENSP00000262643,9606.ENSP00000265340,9606.ENSP00000271638,9606.ENSP00000295206,9606.ENSP00000296417,9606.ENSP00000296503,9606.ENSP00000300093,9606.ENSP00000301633,9606.ENSP00000306548,9606.ENSP00000307705,9606.ENSP00000308750,9606.ENSP00000313950,9606.ENSP00000320147,9606.ENSP00000320866,…	CDC6,GZMB,CD38,GAPDH,HIST1H1D,CCNE1,PITX1,S100A11,EN1,H2AFZ,HMGB2,PLK1,BIRC5,MRPL13,HIST1H1E,CBX2,AURKB,EZH2,CALR,SOX11,E2F7,PIF1,HIST1H1B,HIST2H2AB,HIST2H3D,EIF4EBP1,HIST1H2AD,ETV7,FOXM1,E2F1,SUV39H2,HIST1H4J,BLM,HIST1H2AI,HIST1H2AG,HIST1H3J,STAT1,E2F2,HIST3H2A,CENPF,HDGF,HIST2H3C,HIST2H2AA,DKK1,HIST1H4H,HIST1H3D,HIST1H4C,PCNA,LILRB4,HELLS,HIST2H3A,HMGA1,DEPDC1,CDKN2A,H2AFX,PRAME,TIMELESS,E2F8
GO:1902806	Regulation of cell cycle g1/s phase transition	15	175	0.59	0.0011	9606.ENSP00000209728,9606.ENSP00000216802,9606.ENSP00000216911,9606.ENSP00000256442,9606.ENSP00000320147,9606.ENSP00000321656,9606.ENSP00000323246,9606.ENSP00000345571,9606.ENSP00000356319,9606.ENSP00000368458,9606.ENSP00000378699,9606.ENSP00000405726,9606.ENSP00000418915,9606.ENSP00000481103,9606.ENSP00000481110	CDC6,PSME2,AURKA,CCNB1,EZH2,CDC25C,E2F7,E2F1,KIF14,PCNA,CDK1,CDC45,CDKN2A,E2F8,FAM83D
GO:0031297	Replication fork processing	7	32	1	0.0012	9606.ENSP00000261600,9606.ENSP00000318977,9606.ENSP00000347232,9606.ENSP00000368458,9606.ENSP00000372088,9606.ENSP00000386239,9606.ENSP00000440402	THOC1,GEN1,BLM,PCNA,RAD51,TONSL,DDX11
GO:0032392	DNA geometric change	12	114	0.68	0.0012	9606.ENSP00000262105,9606.ENSP00000264233,9606.ENSP00000265056,9606.ENSP00000296503,9606.ENSP00000328174,9606.ENSP00000347232,9606.ENSP00000359393,9606.ENSP00000361043,9606.ENSP00000372088,9606.ENSP00000399888,9606.ENSP00000440402,9606.ENSP00000482313	MCM4,POLQ,MCM2,HMGB2,PIF1,BLM,HMGB3,RAD54L,RAD51,HMGA1,DDX11,RECQL4
GO:0045859	Regulation of protein kinase activity	38	812	0.33	0.0012	9606.ENSP00000209728,9606.ENSP00000256442,9606.ENSP00000262300,9606.ENSP00000262643,9606.ENSP00000265148,9606.ENSP00000265728,9606.ENSP00000274026,9606.ENSP00000284440,9606.ENSP00000288207,9606.ENSP00000300093,9606.ENSP00000300403,9606.ENSP00000303634,9606.ENSP00000303706,9606.ENSP00000305651,9606.ENSP00000311083,9606.ENSP00000312995,9606.ENSP00000320147,9606.ENSP00000321656,9606.ENSP00000332049,…	CDC6,CCNB1,PKMYT1,CCNE1,CENPE,DBF4,CCNA2,UCHL1,CCNB2,PLK1,TPX2,LRP8,CDC25A,CXCL10,CKS1B,CLSPN,EZH2,CDC25C,CD86,CDKN3,BLM,IQGAP3,KIF14,LAMTOR2,FCGR1A,PSRC1,IRAK1,DKK1,CKS2,MST4,INCENP,CDK1,CXCR4,PTPRC,CDKN2A,PBK,CCNE2,ADAM8
GO:0050869	Negative regulation of b cell activation	7	32	1	0.0012	9606.ENSP00000242208,9606.ENSP00000261600,9606.ENSP00000262629,9606.ENSP00000285670,9606.ENSP00000303939,9606.ENSP00000359393,9606.ENSP00000418915	INHBA,THOC1,TYROBP,SAMSN1,CTLA4,HMGB3,CDKN2A
GO:0051984	Positive regulation of chromosome segregation	7	33	0.99	0.0013	9606.ENSP00000209728,9606.ENSP00000247191,9606.ENSP00000256442,9606.ENSP00000257934,9606.ENSP00000305480,9606.ENSP00000313950,9606.ENSP00000440402	CDC6,DLGAP5,CCNB1,ESPL1,FEN1,AURKB,DDX11
GO:2000045	Regulation of g1/s transition of mitotic cell cycle	14	156	0.61	0.0013	9606.ENSP00000209728,9606.ENSP00000216802,9606.ENSP00000216911,9606.ENSP00000256442,9606.ENSP00000320147,9606.ENSP00000321656,9606.ENSP00000323246,9606.ENSP00000345571,9606.ENSP00000356319,9606.ENSP00000368458,9606.ENSP00000378699,9606.ENSP00000405726,9606.ENSP00000418915,9606.ENSP00000481103	CDC6,PSME2,AURKA,CCNB1,EZH2,CDC25C,E2F7,E2F1,KIF14,PCNA,CDK1,CDC45,CDKN2A,E2F8
GO:0045055	Regulated exocytosis	34	697	0.35	0.0014	9606.ENSP00000219150,9606.ENSP00000236147,9606.ENSP00000236671,9606.ENSP00000250092,9606.ENSP00000259396,9606.ENSP00000260118,9606.ENSP00000261267,9606.ENSP00000261623,9606.ENSP00000262428,9606.ENSP00000262629,9606.ENSP00000271324,9606.ENSP00000271638,9606.ENSP00000289902,9606.ENSP00000291568,9606.ENSP00000296370,9606.ENSP00000339328,9606.ENSP00000345672,9606.ENSP00000346839,9606.ENSP00000354532,…	CORO1A,SELL,CTSD,CD68,ORM1,GGH,LYZ,CYBA,COTL1,TYROBP,CD53,S100A11,FCER1G,CSTB,S100P,PLAUR,CTSB,FN1,PNP,ILF2,LAMTOR2,S100A7,S100A8,S100A9,CTSS,MMP9,PLAU,CYBB,PRDX4,CALML5,HLA-B,PTPRC,CLEC5A,ADAM8
GO:0002695	Negative regulation of leukocyte activation	15	181	0.58	0.0015	9606.ENSP00000216117,9606.ENSP00000242208,9606.ENSP00000261600,9606.ENSP00000262629,9606.ENSP00000264246,9606.ENSP00000265643,9606.ENSP00000285670,9606.ENSP00000303939,9606.ENSP00000322568,9606.ENSP00000332049,9606.ENSP00000359393,9606.ENSP00000411355,9606.ENSP00000418915,9606.ENSP00000419085,9606.ENSP00000430950	HMOX1,INHBA,THOC1,TYROBP,CD80,GAL,SAMSN1,CTLA4,SOX11,CD86,HMGB3,PTPRC,CDKN2A,TIGIT,IDO1
GO:0032069	Regulation of nuclease activity	6	22	1.09	0.0016	9606.ENSP00000257570,9606.ENSP00000274306,9606.ENSP00000296503,9606.ENSP00000342278,9606.ENSP00000368458,9606.ENSP00000440402	OASL,GZMA,HMGB2,OAS2,PCNA,DDX11
GO:0007098	Centrosome cycle	10	81	0.75	0.0017	9606.ENSP00000216911,9606.ENSP00000260731,9606.ENSP00000263753,9606.ENSP00000270861,9606.ENSP00000300035,9606.ENSP00000300093,9606.ENSP00000355966,9606.ENSP00000360944,9606.ENSP00000378699,9606.ENSP00000384792	AURKA,KIF11,SGOL1,PLK4,KIAA0101,PLK1,NEK2,STIL,CDK1,WDR62
GO:0000077	DNA damage checkpoint	13	140	0.63	0.0018	9606.ENSP00000216911,9606.ENSP00000256442,9606.ENSP00000300093,9606.ENSP00000312995,9606.ENSP00000321656,9606.ENSP00000323246,9606.ENSP00000345571,9606.ENSP00000347232,9606.ENSP00000355958,9606.ENSP00000368458,9606.ENSP00000378699,9606.ENSP00000434024,9606.ENSP00000481103	AURKA,CCNB1,PLK1,CLSPN,CDC25C,E2F7,E2F1,BLM,DTL,PCNA,CDK1,H2AFX,E2F8
GO:0031325	Positive regulation of cellular metabolic process	109	3413	0.16	0.0018	9606.ENSP00000209728,9606.ENSP00000216117,9606.ENSP00000216802,9606.ENSP00000216911,9606.ENSP00000217026,9606.ENSP00000226279,9606.ENSP00000233893,9606.ENSP00000236671,9606.ENSP00000240285,9606.ENSP00000242208,9606.ENSP00000244534,9606.ENSP00000244573,9606.ENSP00000247191,9606.ENSP00000256442,9606.ENSP00000257934,9606.ENSP00000261600,9606.ENSP00000261623,9606.ENSP00000262629,9606.ENSP00000262643,…	CDC6,HMOX1,PSME2,AURKA,MYBL2,CD38,HSPE1,CTSD,RDH10,INHBA,HIST1H1D,HIST1H1A,DLGAP5,CCNB1,ESPL1,THOC1,CYBA,TYROBP,CCNE1,EPCAM,CD80,UBE2S,ICAM1,CENPE,PITX1,TFEC,GAL,DBF4,ARNTL2,CCNA2,CCT5,ATAD2,EN1,H2AFZ,HMGB2,PLK1,TPX2,CD3D,CLEC7A,LRP8,CXCL10,HIST1H1E,FANCI,CKS1B,CLSPN,AURKB,MARCO,EZH2,SOX11,E2F7,PMAIP1,CDCA2,HIST1H1B,CD86,PLAUR,FOXM1,IKZF3,E2F1,FN1,BLM,UBE2C,LAGE3,CCL20,STAT1,IQGAP3,ILF2,E2F2,NEK2…
GO:0002694	Regulation of leukocyte activation	28	530	0.38	0.002	9606.ENSP00000216117,9606.ENSP00000219150,9606.ENSP00000226279,9606.ENSP00000242208,9606.ENSP00000261600,9606.ENSP00000262629,9606.ENSP00000264246,9606.ENSP00000265643,9606.ENSP00000285670,9606.ENSP00000289707,9606.ENSP00000289902,9606.ENSP00000302569,9606.ENSP00000303939,9606.ENSP00000319476,9606.ENSP00000322568,9606.ENSP00000332049,9606.ENSP00000344544,9606.ENSP00000354532,9606.ENSP00000358490,…	HMOX1,CORO1A,CD38,INHBA,THOC1,TYROBP,CD80,GAL,SAMSN1,SLAMF8,FCER1G,CLEC7A,CTLA4,ICOS,SOX11,CD86,IKZF3,PNP,CD2,HMGB3,FANCA,LILRB4,HLA-DMB,PTPRC,CDKN2A,TIGIT,IDO1,ADAM8
GO:0046483	Heterocycle metabolic process	94	2840	0.18	0.002	9606.ENSP00000166345,9606.ENSP00000209728,9606.ENSP00000216117,9606.ENSP00000219097,9606.ENSP00000221486,9606.ENSP00000228843,9606.ENSP00000229239,9606.ENSP00000229270,9606.ENSP00000240488,9606.ENSP00000242776,9606.ENSP00000256442,9606.ENSP00000256722,9606.ENSP00000260118,9606.ENSP00000261600,9606.ENSP00000262105,9606.ENSP00000262643,9606.ENSP00000264233,9606.ENSP00000264596,9606.ENSP00000265056,…	TRIP13,CDC6,HMOX1,ORC6,RNASEH2A,RAD51AP1,GAPDH,TPI1,MND1,DDX39A,CCNB1,CMPK2,GGH,THOC1,MCM4,CCNE1,POLQ,NEIL3,MCM2,SNRPG,CDCA5,HMGB2,KIAA0101,TK1,FEN1,ISG20,FANCI,CLSPN,GEN1,EZH2,DCTPP1,APOBEC3B,PIF1,LIN9,IDH2,SHMT2,NME1,ETV7,OAS2,FOXM1,E2F1,HIST1H4J,BLM,LAGE3,RRM2,WDHD1,PNP,ILF2,HORMAD1,E2F2,EXO1,HIST3H2A,CENPF,DTL,UBE2T,HMGB3,ORC1,RAD54L,PGK1,SRPK1,PSAT1,HIST1H4H,HIST1H4C,PCNA,ISG15,RAD51,FANCA,P…
GO:0051382	Kinetochore assembly	5	13	1.24	0.002	9606.ENSP00000265148,9606.ENSP00000336868,9606.ENSP00000355922,9606.ENSP00000357308,9606.ENSP00000377007	CENPE,CENPA,CENPF,CENPW,CENPN
GO:0051445	Regulation of meiotic cell cycle	8	50	0.86	0.002	9606.ENSP00000166345,9606.ENSP00000303706,9606.ENSP00000320866,9606.ENSP00000321656,9606.ENSP00000355167,9606.ENSP00000356379,9606.ENSP00000358813,9606.ENSP00000361540	TRIP13,CDC25A,CALR,CDC25C,HORMAD1,ASPM,TTK,CDC20
GO:0051988	Regulation of attachment of spindle microtubules to kinetochore	5	13	1.24	0.002	9606.ENSP00000256442,9606.ENSP00000313950,9606.ENSP00000323300,9606.ENSP00000355966,9606.ENSP00000404190	CCNB1,AURKB,SPAG5,NEK2,RACGAP1
GO:0060337	Type i interferon signaling pathway	9	67	0.79	0.0022	9606.ENSP00000257570,9606.ENSP00000306565,9606.ENSP00000342278,9606.ENSP00000342513,9606.ENSP00000354394,9606.ENSP00000358997,9606.ENSP00000368699,9606.ENSP00000371471,9606.ENSP00000399168	OASL,ISG20,OAS2,IFI6,STAT1,IRAK1,ISG15,RSAD2,HLA-B
GO:0006807	Nitrogen compound metabolic process	191	6852	0.1	0.0023	9606.ENSP00000005286,9606.ENSP00000166345,9606.ENSP00000209728,9606.ENSP00000215743,9606.ENSP00000216117,9606.ENSP00000216341,9606.ENSP00000216802,9606.ENSP00000216911,9606.ENSP00000219097,9606.ENSP00000221486,9606.ENSP00000228843,9606.ENSP00000229238,9606.ENSP00000229239,9606.ENSP00000229270,9606.ENSP00000231009,9606.ENSP00000236671,9606.ENSP00000240488,9606.ENSP00000242208,9606.ENSP00000242776,…	TMEM132A,TRIP13,CDC6,MMP11,HMOX1,GZMB,PSME2,AURKA,ORC6,RNASEH2A,RAD51AP1,MRPL51,GAPDH,TPI1,GZMK,CTSD,MND1,INHBA,DDX39A,HIST1H1D,ADAMDEC1,CCNB1,CMPK2,ESPL1,MRPL15,GGH,LYZ,THOC1,MCM4,PKMYT1,CCNE1,POLQ,UBE2S,NEIL3,MCM2,PLK4,SNRPG,CCNA2,GZMA,PLA2G7,GGCT,CDCA5,PPP4C,UCHL1,BUB1B,HIST1H2BD,CCR5,HMGB2,MAD2L1,MELK,KIAA0101,PLK1,BIRC5,TK1,BUB1,LRP8,CDC25A,FEN1,MRPL13,ISG20,BOLA2B,HIST1H1E,FANCI,TRIM59,CLSP…
GO:0040001	Establishment of mitotic spindle localization	7	37	0.94	0.0024	9606.ENSP00000257934,9606.ENSP00000261597,9606.ENSP00000296509,9606.ENSP00000300093,9606.ENSP00000336868,9606.ENSP00000386348,9606.ENSP00000453403	ESPL1,NDC80,MAD2L1,PLK1,CENPA,SAPCD2,NUSAP1
GO:1902750	Negative regulation of cell cycle g2/m phase transition	11	104	0.68	0.0024	9606.ENSP00000209728,9606.ENSP00000216802,9606.ENSP00000216911,9606.ENSP00000300093,9606.ENSP00000312995,9606.ENSP00000313950,9606.ENSP00000347232,9606.ENSP00000355958,9606.ENSP00000360623,9606.ENSP00000363993,9606.ENSP00000378699	CDC6,PSME2,AURKA,PLK1,CLSPN,AURKB,BLM,DTL,ORC1,PSMB9,CDK1
GO:0051653	Spindle localization	8	52	0.85	0.0025	9606.ENSP00000257934,9606.ENSP00000261597,9606.ENSP00000296509,9606.ENSP00000300093,9606.ENSP00000336868,9606.ENSP00000356379,9606.ENSP00000386348,9606.ENSP00000453403	ESPL1,NDC80,MAD2L1,PLK1,CENPA,ASPM,SAPCD2,NUSAP1
GO:0072719	Cellular response to cisplatin	4	6	1.48	0.0025	9606.ENSP00000216117,9606.ENSP00000372088,9606.ENSP00000440402,9606.ENSP00000450607	HMOX1,RAD51,DDX11,TIMELESS
GO:0042221	Response to chemical	131	4333	0.14	0.0026	9606.ENSP00000209728,9606.ENSP00000216117,9606.ENSP00000216802,9606.ENSP00000217026,9606.ENSP00000219150,9606.ENSP00000219919,9606.ENSP00000226279,9606.ENSP00000229239,9606.ENSP00000233893,9606.ENSP00000236147,9606.ENSP00000242208,9606.ENSP00000250092,9606.ENSP00000256442,9606.ENSP00000256722,9606.ENSP00000257570,9606.ENSP00000259938,9606.ENSP00000260102,9606.ENSP00000260118,9606.ENSP00000261366,…	CDC6,HMOX1,PSME2,MYBL2,CORO1A,AQP9,CD38,GAPDH,HSPE1,SELL,INHBA,CD68,CCNB1,CMPK2,OASL,CLPS,MRPL15,GGH,LMNB1,CYBA,CCNE1,PRDX1,KIF18A,CD80,ICAM1,MCM2,GAL,SQLE,CCNA2,UCHL1,CXCL13,SLAMF8,FCER1G,CCR5,LAPTM5,S100P,H2AFZ,HMGB2,MELK,LY6D,BIRC5,CLEC7A,LRP8,CXCL10,CST1,SHCBP1,CXCL8,ISG20,BOLA2B,CXCL11,EZH2,CALR,MMP1,PMAIP1,BOLA2,CD86,HIST2H3D,SHMT2,NME1,PLAUR,EIF4EBP1,FPR3,OAS2,IFI6,CTSL,E2F1,CTSB,FN1,SUV39…
GO:0043085	Positive regulation of catalytic activity	57	1489	0.24	0.0026	9606.ENSP00000209728,9606.ENSP00000216802,9606.ENSP00000225655,9606.ENSP00000233893,9606.ENSP00000236671,9606.ENSP00000240423,9606.ENSP00000256442,9606.ENSP00000259938,9606.ENSP00000261623,9606.ENSP00000264552,9606.ENSP00000264832,9606.ENSP00000265148,9606.ENSP00000265728,9606.ENSP00000286758,9606.ENSP00000296503,9606.ENSP00000300093,9606.ENSP00000300403,9606.ENSP00000302569,9606.ENSP00000303634,…	CDC6,PSME2,PFN1,HSPE1,CTSD,NCAPH,CCNB1,CLPS,CYBA,UBE2S,ICAM1,CENPE,DBF4,CXCL13,HMGB2,PLK1,TPX2,CLEC7A,LRP8,CKS1B,CLSPN,AURKB,EZH2,PMAIP1,CD86,FN1,UBE2C,CCL20,IQGAP3,ARHGAP11A,NEK2,KIF14,RGS1,LAMTOR2,S100A8,S100A9,FCGR1A,PSRC1,IRAK1,CDC20,CLPSL1,DKK1,CKS2,PCNA,MST4,INCENP,CDK1,CXCR4,RACGAP1,PTPRC,DEPDC1,CDKN2A,PBK,DDX11,ADAM8,APOC1,APOC2
GO:0045934	Negative regulation of nucleobase-containing compound metabolic process	58	1528	0.24	0.0027	9606.ENSP00000226279,9606.ENSP00000244534,9606.ENSP00000244573,9606.ENSP00000261600,9606.ENSP00000262643,9606.ENSP00000264233,9606.ENSP00000265340,9606.ENSP00000265440,9606.ENSP00000274306,9606.ENSP00000295206,9606.ENSP00000296417,9606.ENSP00000296503,9606.ENSP00000300093,9606.ENSP00000301633,9606.ENSP00000307705,9606.ENSP00000308750,9606.ENSP00000313950,9606.ENSP00000320147,9606.ENSP00000320866,…	CD38,HIST1H1D,HIST1H1A,THOC1,CCNE1,POLQ,PITX1,TFEC,GZMA,EN1,H2AFZ,HMGB2,PLK1,BIRC5,HIST1H1E,CBX2,AURKB,EZH2,CALR,SOX11,E2F7,PIF1,HIST1H1B,HIST2H2AB,HIST2H3D,HIST1H2AD,ETV7,FOXM1,E2F1,SUV39H2,HIST1H4J,BLM,HIST1H2AI,HIST1H2AG,HIST1H3J,STAT1,E2F2,HIST3H2A,CENPF,HDGF,HIST2H3C,HIST2H2AA,DKK1,HIST1H4H,HIST1H3D,HIST1H4C,PCNA,LILRB4,HELLS,HIST2H3A,TONSL,HMGA1,DEPDC1,CDKN2A,H2AFX,PRAME,TIMELESS,E2F8
GO:0042770	Signal transduction in response to dna damage	11	107	0.67	0.0029	9606.ENSP00000216911,9606.ENSP00000256442,9606.ENSP00000300093,9606.ENSP00000321656,9606.ENSP00000323246,9606.ENSP00000342307,9606.ENSP00000345571,9606.ENSP00000355958,9606.ENSP00000368458,9606.ENSP00000378699,9606.ENSP00000481103	AURKA,CCNB1,PLK1,CDC25C,E2F7,FOXM1,E2F1,DTL,PCNA,CDK1,E2F8
GO:0051101	Regulation of dna binding	12	128	0.63	0.003	9606.ENSP00000216117,9606.ENSP00000274306,9606.ENSP00000275517,9606.ENSP00000296503,9606.ENSP00000322568,9606.ENSP00000337060,9606.ENSP00000339328,9606.ENSP00000345571,9606.ENSP00000355966,9606.ENSP00000361405,9606.ENSP00000414109,9606.ENSP00000432218	HMOX1,GZMA,CDCA5,HMGB2,SOX11,NME1,PLAUR,E2F1,NEK2,MMP9,HJURP,IL32
GO:1903507	Negative regulation of nucleic acid-templated transcription	52	1324	0.25	0.003	9606.ENSP00000226279,9606.ENSP00000244534,9606.ENSP00000262643,9606.ENSP00000265340,9606.ENSP00000265440,9606.ENSP00000295206,9606.ENSP00000296417,9606.ENSP00000296503,9606.ENSP00000300093,9606.ENSP00000301633,9606.ENSP00000307705,9606.ENSP00000308750,9606.ENSP00000313950,9606.ENSP00000320147,9606.ENSP00000320866,9606.ENSP00000322568,9606.ENSP00000323246,9606.ENSP00000330074,9606.ENSP00000332790,…	CD38,HIST1H1D,CCNE1,PITX1,TFEC,EN1,H2AFZ,HMGB2,PLK1,BIRC5,HIST1H1E,CBX2,AURKB,EZH2,CALR,SOX11,E2F7,HIST1H1B,HIST2H2AB,HIST2H3D,HIST1H2AD,ETV7,FOXM1,E2F1,SUV39H2,HIST1H4J,HIST1H2AI,HIST1H2AG,HIST1H3J,STAT1,E2F2,HIST3H2A,CENPF,HDGF,HIST2H3C,HIST2H2AA,DKK1,HIST1H4H,HIST1H3D,HIST1H4C,PCNA,LILRB4,HELLS,HIST2H3A,TONSL,HMGA1,DEPDC1,CDKN2A,H2AFX,PRAME,TIMELESS,E2F8
GO:0051493	Regulation of cytoskeleton organization	28	546	0.37	0.0031	9606.ENSP00000216911,9606.ENSP00000219150,9606.ENSP00000225655,9606.ENSP00000233143,9606.ENSP00000260731,9606.ENSP00000262428,9606.ENSP00000263181,9606.ENSP00000263867,9606.ENSP00000264832,9606.ENSP00000270861,9606.ENSP00000296484,9606.ENSP00000300093,9606.ENSP00000300403,9606.ENSP00000318977,9606.ENSP00000319417,9606.ENSP00000323300,9606.ENSP00000326550,9606.ENSP00000354451,9606.ENSP00000355966,…	AURKA,CORO1A,PFN1,TMSB10,KIF11,COTL1,KIF18A,CAPG,ICAM1,PLK4,POC1A,PLK1,TPX2,GEN1,SKA3,SPAG5,TACC3,IQGAP3,NEK2,PFDN2,S100A8,S100A9,PSRC1,STIL,RCC1,CKAP2,STMN1,ENSG00000158164
GO:1904666	Regulation of ubiquitin protein ligase activity	6	26	1.02	0.0032	9606.ENSP00000264552,9606.ENSP00000296509,9606.ENSP00000300093,9606.ENSP00000348838,9606.ENSP00000361540,9606.ENSP00000418915	UBE2S,MAD2L1,PLK1,UBE2C,CDC20,CDKN2A
GO:0006725	Cellular aromatic compound metabolic process	94	2882	0.17	0.0033	9606.ENSP00000166345,9606.ENSP00000209728,9606.ENSP00000216117,9606.ENSP00000219097,9606.ENSP00000221486,9606.ENSP00000228843,9606.ENSP00000229239,9606.ENSP00000229270,9606.ENSP00000240488,9606.ENSP00000242776,9606.ENSP00000256442,9606.ENSP00000256722,9606.ENSP00000260118,9606.ENSP00000261600,9606.ENSP00000262105,9606.ENSP00000262643,9606.ENSP00000264233,9606.ENSP00000264596,9606.ENSP00000265056,…	TRIP13,CDC6,HMOX1,ORC6,RNASEH2A,RAD51AP1,GAPDH,TPI1,MND1,DDX39A,CCNB1,CMPK2,GGH,THOC1,MCM4,CCNE1,POLQ,NEIL3,MCM2,SQLE,SNRPG,CDCA5,HMGB2,KIAA0101,TK1,FEN1,ISG20,FANCI,CLSPN,GEN1,EZH2,DCTPP1,APOBEC3B,PIF1,LIN9,IDH2,SHMT2,NME1,ETV7,OAS2,FOXM1,E2F1,CTSB,HIST1H4J,BLM,LAGE3,RRM2,WDHD1,PNP,ILF2,HORMAD1,E2F2,EXO1,HIST3H2A,CENPF,DTL,UBE2T,HMGB3,ORC1,RAD54L,PGK1,SRPK1,PSAT1,HIST1H4H,HIST1H4C,PCNA,ISG15,RAD…
GO:1901360	Organic cyclic compound metabolic process	100	3118	0.17	0.0034	9606.ENSP00000166345,9606.ENSP00000209728,9606.ENSP00000216117,9606.ENSP00000219097,9606.ENSP00000221486,9606.ENSP00000228843,9606.ENSP00000229239,9606.ENSP00000229270,9606.ENSP00000240488,9606.ENSP00000242776,9606.ENSP00000256442,9606.ENSP00000256722,9606.ENSP00000260118,9606.ENSP00000261600,9606.ENSP00000262105,9606.ENSP00000262643,9606.ENSP00000264233,9606.ENSP00000264596,9606.ENSP00000265056,…	TRIP13,CDC6,HMOX1,ORC6,RNASEH2A,RAD51AP1,GAPDH,TPI1,MND1,DDX39A,CCNB1,CMPK2,GGH,THOC1,MCM4,CCNE1,POLQ,NEIL3,MCM2,SQLE,SNRPG,CDCA5,HMGB2,KIAA0101,TK1,FEN1,ISG20,FANCI,CLSPN,GEN1,EZH2,DCTPP1,APOBEC3B,PIF1,LIN9,IDH2,SHMT2,NME1,ETV7,OAS2,FOXM1,E2F1,CTSB,HIST1H4J,BLM,DHCR7,LAGE3,RRM2,WDHD1,PNP,ILF2,HORMAD1,E2F2,EXO1,HIST3H2A,CENPF,DTL,UBE2T,HMGB3,ORC1,RAD54L,PGK1,SRPK1,PSAT1,HIST1H4H,HIST1H4C,PCNA,ISG…
GO:1903557	Positive regulation of tumor necrosis factor superfamily cytokine production	10	90	0.7	0.0034	9606.ENSP00000259396,9606.ENSP00000261623,9606.ENSP00000262629,9606.ENSP00000289902,9606.ENSP00000302569,9606.ENSP00000332049,9606.ENSP00000358490,9606.ENSP00000367851,9606.ENSP00000411355,9606.ENSP00000453302	ORM1,CYBA,TYROBP,FCER1G,CLEC7A,CD86,CD2,CYBB,PTPRC,ADAM8
GO:0051250	Negative regulation of lymphocyte activation	13	152	0.59	0.0035	9606.ENSP00000242208,9606.ENSP00000261600,9606.ENSP00000262629,9606.ENSP00000264246,9606.ENSP00000265643,9606.ENSP00000285670,9606.ENSP00000303939,9606.ENSP00000322568,9606.ENSP00000332049,9606.ENSP00000359393,9606.ENSP00000418915,9606.ENSP00000419085,9606.ENSP00000430950	INHBA,THOC1,TYROBP,CD80,GAL,SAMSN1,CTLA4,SOX11,CD86,HMGB3,CDKN2A,TIGIT,IDO1
GO:0051641	Cellular localization	96	2967	0.17	0.0035	9606.ENSP00000216911,9606.ENSP00000219150,9606.ENSP00000233143,9606.ENSP00000236147,9606.ENSP00000236671,9606.ENSP00000242776,9606.ENSP00000247191,9606.ENSP00000250092,9606.ENSP00000256442,9606.ENSP00000257934,9606.ENSP00000259396,9606.ENSP00000260118,9606.ENSP00000260363,9606.ENSP00000261267,9606.ENSP00000261597,9606.ENSP00000261600,9606.ENSP00000261623,9606.ENSP00000262428,9606.ENSP00000262629,…	AURKA,CORO1A,TMSB10,SELL,CTSD,DDX39A,DLGAP5,CD68,CCNB1,ESPL1,ORM1,GGH,KIF23,LYZ,NDC80,THOC1,CYBA,COTL1,TYROBP,KIF18A,CENPE,ANLN,PLK4,CD53,NUF2,S100A11,SNRPG,CDCA5,UCHL1,FCER1G,CSTB,CCR5,S100P,MAD2L1,PLK1,TUBA1C,BIRC5,AURKB,EZH2,CALR,SPAG5,PMAIP1,HIST1H1B,CASC5,CENPA,PLAUR,YIF1B,CTSB,TAP1,FN1,PNP,ILF2,CENPF,NEK2,KIF14,ASPM,LAMTOR2,S100A7,S100A8,S100A9,CTSS,CD2,TTK,PSRC1,GBP5,STIL,KIF2C,MMP9,PLAU,C…
GO:0071156	Regulation of cell cycle arrest	11	110	0.66	0.0035	9606.ENSP00000216911,9606.ENSP00000256442,9606.ENSP00000320866,9606.ENSP00000321656,9606.ENSP00000323246,9606.ENSP00000342307,9606.ENSP00000345571,9606.ENSP00000368458,9606.ENSP00000378699,9606.ENSP00000418915,9606.ENSP00000481103	AURKA,CCNB1,CALR,CDC25C,E2F7,FOXM1,E2F1,PCNA,CDK1,CDKN2A,E2F8
GO:0010032	Meiotic chromosome condensation	4	7	1.42	0.0036	9606.ENSP00000240423,9606.ENSP00000325017,9606.ENSP00000349961,9606.ENSP00000378295	NCAPH,NCAPD2,SMC4,INCENP
GO:0006275	Regulation of dna replication	11	111	0.66	0.0037	9606.ENSP00000209728,9606.ENSP00000265728,9606.ENSP00000271638,9606.ENSP00000274026,9606.ENSP00000323246,9606.ENSP00000347232,9606.ENSP00000368458,9606.ENSP00000378699,9606.ENSP00000393139,9606.ENSP00000450607,9606.ENSP00000481103	CDC6,DBF4,S100A11,CCNA2,E2F7,BLM,PCNA,CDK1,CDC7,TIMELESS,E2F8
GO:0010971	Positive regulation of g2/m transition of mitotic cell cycle	6	27	1.01	0.0037	9606.ENSP00000256442,9606.ENSP00000303706,9606.ENSP00000321656,9606.ENSP00000355958,9606.ENSP00000378699,9606.ENSP00000393139	CCNB1,CDC25A,CDC25C,DTL,CDK1,CDC7
GO:0031640	Killing of cells of other organism	10	91	0.7	0.0037	9606.ENSP00000229239,9606.ENSP00000261267,9606.ENSP00000286758,9606.ENSP00000305651,9606.ENSP00000306512,9606.ENSP00000306884,9606.ENSP00000349430,9606.ENSP00000351671,9606.ENSP00000354901,9606.ENSP00000476136	GAPDH,LYZ,CXCL13,CXCL10,CXCL8,CXCL11,HIST1H2BK,CCL20,CXCL9,HIST1H2BJ
GO:0044093	Positive regulation of molecular function	66	1842	0.21	0.0039	9606.ENSP00000209728,9606.ENSP00000216802,9606.ENSP00000225655,9606.ENSP00000233893,9606.ENSP00000236671,9606.ENSP00000240423,9606.ENSP00000256442,9606.ENSP00000259938,9606.ENSP00000261623,9606.ENSP00000264552,9606.ENSP00000264832,9606.ENSP00000265148,9606.ENSP00000265643,9606.ENSP00000265728,9606.ENSP00000286758,9606.ENSP00000296503,9606.ENSP00000300093,9606.ENSP00000300403,9606.ENSP00000302569,…	CDC6,PSME2,PFN1,HSPE1,CTSD,NCAPH,CCNB1,CLPS,CYBA,UBE2S,ICAM1,CENPE,GAL,DBF4,CXCL13,HMGB2,PLK1,TPX2,CLEC7A,LRP8,CKS1B,CLSPN,AURKB,EZH2,PMAIP1,CTHRC1,CD86,NME1,PLAUR,FN1,UBE2C,CCL20,IQGAP3,ARHGAP11A,NEK2,KIF14,RGS1,LAMTOR2,S100A8,S100A9,CTSS,FCGR1A,PSRC1,IRAK1,MMP9,CDC20,RTKN2,CLPSL1,DKK1,CKS2,PCNA,MST4,INCENP,CDK1,CXCR4,RACGAP1,STMN1,PTPRC,DEPDC1,CDKN2A,PBK,IL32,DDX11,ADAM8,APOC1,APOC2
GO:0045892	Negative regulation of transcription, dna-templated	50	1273	0.25	0.004	9606.ENSP00000226279,9606.ENSP00000244534,9606.ENSP00000262643,9606.ENSP00000265340,9606.ENSP00000295206,9606.ENSP00000296417,9606.ENSP00000296503,9606.ENSP00000300093,9606.ENSP00000301633,9606.ENSP00000307705,9606.ENSP00000308750,9606.ENSP00000313950,9606.ENSP00000320147,9606.ENSP00000320866,9606.ENSP00000322568,9606.ENSP00000323246,9606.ENSP00000330074,9606.ENSP00000332790,9606.ENSP00000333277,…	CD38,HIST1H1D,CCNE1,PITX1,EN1,H2AFZ,HMGB2,PLK1,BIRC5,HIST1H1E,CBX2,AURKB,EZH2,CALR,SOX11,E2F7,HIST1H1B,HIST2H2AB,HIST2H3D,HIST1H2AD,ETV7,FOXM1,E2F1,SUV39H2,HIST1H4J,HIST1H2AI,HIST1H2AG,HIST1H3J,STAT1,E2F2,HIST3H2A,CENPF,HDGF,HIST2H3C,HIST2H2AA,DKK1,HIST1H4H,HIST1H3D,HIST1H4C,PCNA,LILRB4,HELLS,HIST2H3A,HMGA1,DEPDC1,CDKN2A,H2AFX,PRAME,TIMELESS,E2F8
GO:0030593	Neutrophil chemotaxis	9	74	0.74	0.0041	9606.ENSP00000286758,9606.ENSP00000289902,9606.ENSP00000305651,9606.ENSP00000306512,9606.ENSP00000306884,9606.ENSP00000351671,9606.ENSP00000354901,9606.ENSP00000357722,9606.ENSP00000357727	CXCL13,FCER1G,CXCL10,CXCL8,CXCL11,CCL20,CXCL9,S100A8,S100A9
GO:0045619	Regulation of lymphocyte differentiation	14	178	0.55	0.0041	9606.ENSP00000242208,9606.ENSP00000264246,9606.ENSP00000289707,9606.ENSP00000303939,9606.ENSP00000332049,9606.ENSP00000344544,9606.ENSP00000354532,9606.ENSP00000358490,9606.ENSP00000359393,9606.ENSP00000373952,9606.ENSP00000375616,9606.ENSP00000411355,9606.ENSP00000418915,9606.ENSP00000453302	INHBA,CD80,SLAMF8,CTLA4,CD86,IKZF3,PNP,CD2,HMGB3,FANCA,LILRB4,PTPRC,CDKN2A,ADAM8
GO:0090304	Nucleic acid metabolic process	75	2178	0.2	0.0041	9606.ENSP00000166345,9606.ENSP00000209728,9606.ENSP00000219097,9606.ENSP00000221486,9606.ENSP00000228843,9606.ENSP00000240488,9606.ENSP00000242776,9606.ENSP00000256442,9606.ENSP00000261600,9606.ENSP00000262105,9606.ENSP00000262643,9606.ENSP00000264233,9606.ENSP00000264596,9606.ENSP00000265056,9606.ENSP00000272348,9606.ENSP00000275517,9606.ENSP00000296503,9606.ENSP00000300035,9606.ENSP00000301634,…	TRIP13,CDC6,ORC6,RNASEH2A,RAD51AP1,MND1,DDX39A,CCNB1,THOC1,MCM4,CCNE1,POLQ,NEIL3,MCM2,SNRPG,CDCA5,HMGB2,KIAA0101,TK1,FEN1,ISG20,FANCI,CLSPN,GEN1,EZH2,DCTPP1,APOBEC3B,PIF1,LIN9,NME1,ETV7,OAS2,FOXM1,E2F1,HIST1H4J,BLM,LAGE3,WDHD1,ILF2,HORMAD1,E2F2,EXO1,HIST3H2A,CENPF,DTL,UBE2T,HMGB3,ORC1,RAD54L,SRPK1,HIST1H4H,HIST1H4C,PCNA,ISG15,RAD51,FANCA,PTTG1,HELLS,CDK1,CBSL,TONSL,CDC7,HMGA1,CDC45,TOP2A,MCM10,CD…
GO:0002479	Antigen processing and presentation of exogenous peptide antigen via mhc class i, tap-dependent	9	75	0.74	0.0044	9606.ENSP00000216802,9606.ENSP00000261623,9606.ENSP00000320866,9606.ENSP00000346206,9606.ENSP00000358165,9606.ENSP00000363993,9606.ENSP00000364034,9606.ENSP00000367851,9606.ENSP00000399168	PSME2,CYBA,CALR,TAP1,FCGR1A,PSMB9,TAP2,CYBB,HLA-B
GO:0045840	Positive regulation of mitotic nuclear division	8	58	0.8	0.0046	9606.ENSP00000216911,9606.ENSP00000247191,9606.ENSP00000257934,9606.ENSP00000275517,9606.ENSP00000301633,9606.ENSP00000313950,9606.ENSP00000348838,9606.ENSP00000453403	AURKA,DLGAP5,ESPL1,CDCA5,BIRC5,AURKB,UBE2C,NUSAP1
GO:0060326	Cell chemotaxis	15	204	0.53	0.0046	9606.ENSP00000219150,9606.ENSP00000286758,9606.ENSP00000289707,9606.ENSP00000289902,9606.ENSP00000292303,9606.ENSP00000296503,9606.ENSP00000305651,9606.ENSP00000306512,9606.ENSP00000306884,9606.ENSP00000351671,9606.ENSP00000354901,9606.ENSP00000357722,9606.ENSP00000357727,9606.ENSP00000386884,9606.ENSP00000453302	CORO1A,CXCL13,SLAMF8,FCER1G,CCR5,HMGB2,CXCL10,CXCL8,CXCL11,CCL20,CXCL9,S100A8,S100A9,CXCR4,ADAM8
GO:0000076	DNA replication checkpoint	5	17	1.13	0.0048	9606.ENSP00000209728,9606.ENSP00000312995,9606.ENSP00000360623,9606.ENSP00000405726,9606.ENSP00000450607	CDC6,CLSPN,ORC1,CDC45,TIMELESS
GO:0006977	DNA damage response, signal transduction by p53 class mediator resulting in cell cycle arrest	8	59	0.79	0.005	9606.ENSP00000216911,9606.ENSP00000256442,9606.ENSP00000321656,9606.ENSP00000323246,9606.ENSP00000345571,9606.ENSP00000368458,9606.ENSP00000378699,9606.ENSP00000481103	AURKA,CCNB1,CDC25C,E2F7,E2F1,PCNA,CDK1,E2F8
GO:0030574	Collagen catabolic process	7	43	0.87	0.005	9606.ENSP00000215743,9606.ENSP00000236671,9606.ENSP00000322788,9606.ENSP00000345344,9606.ENSP00000345672,9606.ENSP00000357981,9606.ENSP00000361405	MMP11,CTSD,MMP1,CTSL,CTSB,CTSS,MMP9
GO:0034341	Response to interferon-gamma	14	182	0.55	0.005	9606.ENSP00000229239,9606.ENSP00000257570,9606.ENSP00000264832,9606.ENSP00000342278,9606.ENSP00000351671,9606.ENSP00000354394,9606.ENSP00000358165,9606.ENSP00000359488,9606.ENSP00000364076,9606.ENSP00000364080,9606.ENSP00000366249,9606.ENSP00000378786,9606.ENSP00000384886,9606.ENSP00000399168	GAPDH,OASL,ICAM1,OAS2,CCL20,STAT1,FCGR1A,GBP5,HLA-DQA2,HLA-DQB1,UBD,HLA-DRA,IFI30,HLA-B
GO:0045143	Homologous chromosome segregation	8	59	0.79	0.005	9606.ENSP00000166345,9606.ENSP00000257934,9606.ENSP00000262643,9606.ENSP00000263753,9606.ENSP00000300093,9606.ENSP00000355167,9606.ENSP00000377536,9606.ENSP00000429089	TRIP13,ESPL1,CCNE1,SGOL1,PLK1,HORMAD1,PTTG1,CCNE2
GO:0051177	Meiotic sister chromatid cohesion	4	8	1.36	0.005	9606.ENSP00000263753,9606.ENSP00000287598,9606.ENSP00000302530,9606.ENSP00000355167	SGOL1,BUB1B,BUB1,HORMAD1
GO:0051173	Positive regulation of nitrogen compound metabolic process	102	3239	0.16	0.0051	9606.ENSP00000209728,9606.ENSP00000216802,9606.ENSP00000216911,9606.ENSP00000217026,9606.ENSP00000226279,9606.ENSP00000233893,9606.ENSP00000236671,9606.ENSP00000242208,9606.ENSP00000244534,9606.ENSP00000244573,9606.ENSP00000247191,9606.ENSP00000256442,9606.ENSP00000257934,9606.ENSP00000261600,9606.ENSP00000262643,9606.ENSP00000263735,9606.ENSP00000264246,9606.ENSP00000264552,9606.ENSP00000264832,…	CDC6,PSME2,AURKA,MYBL2,CD38,HSPE1,CTSD,INHBA,HIST1H1D,HIST1H1A,DLGAP5,CCNB1,ESPL1,THOC1,CCNE1,EPCAM,CD80,UBE2S,ICAM1,CENPE,PITX1,TFEC,GAL,DBF4,ARNTL2,CCNA2,CCT5,ATAD2,EN1,H2AFZ,HMGB2,PLK1,TPX2,CD3D,CLEC7A,LRP8,CXCL10,HIST1H1E,FANCI,CKS1B,CLSPN,AURKB,MARCO,EZH2,SOX11,E2F7,PMAIP1,CDCA2,HIST1H1B,CD86,PLAUR,FOXM1,IKZF3,E2F1,FN1,BLM,UBE2C,LAGE3,CCL20,STAT1,IQGAP3,ILF2,E2F2,DTL,NEK2,KIF14,LAMTOR2,S100A…
GO:0051640	Organelle localization	29	598	0.34	0.0052	9606.ENSP00000216911,9606.ENSP00000247191,9606.ENSP00000256442,9606.ENSP00000257934,9606.ENSP00000260363,9606.ENSP00000261597,9606.ENSP00000263181,9606.ENSP00000265148,9606.ENSP00000270861,9606.ENSP00000271452,9606.ENSP00000275517,9606.ENSP00000284440,9606.ENSP00000296509,9606.ENSP00000300093,9606.ENSP00000301633,9606.ENSP00000336868,9606.ENSP00000355922,9606.ENSP00000355966,9606.ENSP00000356319,…	AURKA,DLGAP5,CCNB1,ESPL1,KIF23,NDC80,KIF18A,CENPE,PLK4,NUF2,CDCA5,UCHL1,MAD2L1,PLK1,BIRC5,CENPA,CENPF,NEK2,KIF14,ASPM,PSRC1,KIF2C,CDCA8,INCENP,CDK1,SAPCD2,KIFC1,NUSAP1,FAM83D
GO:0002683	Negative regulation of immune system process	24	450	0.39	0.0054	9606.ENSP00000216117,9606.ENSP00000242208,9606.ENSP00000250092,9606.ENSP00000261600,9606.ENSP00000262629,9606.ENSP00000264246,9606.ENSP00000265643,9606.ENSP00000285670,9606.ENSP00000289707,9606.ENSP00000289902,9606.ENSP00000303939,9606.ENSP00000322568,9606.ENSP00000332049,9606.ENSP00000337060,9606.ENSP00000347168,9606.ENSP00000359393,9606.ENSP00000366956,9606.ENSP00000367034,9606.ENSP00000375616,…	HMOX1,INHBA,CD68,THOC1,TYROBP,CD80,GAL,SAMSN1,SLAMF8,FCER1G,CTLA4,SOX11,CD86,NME1,HIST1H4J,HMGB3,HIST1H4H,HIST1H4C,LILRB4,HLA-B,PTPRC,CDKN2A,TIGIT,IDO1
GO:0010629	Negative regulation of gene expression	70	2014	0.2	0.0054	9606.ENSP00000216117,9606.ENSP00000216341,9606.ENSP00000216911,9606.ENSP00000226279,9606.ENSP00000229239,9606.ENSP00000242208,9606.ENSP00000244534,9606.ENSP00000256442,9606.ENSP00000259396,9606.ENSP00000262629,9606.ENSP00000262643,9606.ENSP00000265340,9606.ENSP00000295206,9606.ENSP00000296417,9606.ENSP00000296503,9606.ENSP00000300093,9606.ENSP00000301633,9606.ENSP00000306548,9606.ENSP00000307705,…	HMOX1,GZMB,AURKA,CD38,GAPDH,INHBA,HIST1H1D,CCNB1,ORM1,TYROBP,CCNE1,PITX1,EN1,H2AFZ,HMGB2,PLK1,BIRC5,MRPL13,HIST1H1E,CBX2,AURKB,EZH2,CALR,SOX11,E2F7,HIST1H1B,HIST2H2AB,HIST2H3D,NME1,EIF4EBP1,HIST1H2AD,ETV7,FOXM1,E2F1,FN1,SUV39H2,HIST1H4J,HIST1H2AI,HIST1H2AG,HIST1H3J,STAT1,IQGAP3,E2F2,HIST3H2A,CENPF,HDGF,HIST2H3C,HIST2H2AA,DKK1,HIST1H4H,HIST1H3D,HIST1H4C,PCNA,ISG15,LILRB4,HELLS,HIST2H3A,HMGA1,LAPTM…
GO:0043549	Regulation of kinase activity	39	918	0.29	0.0054	9606.ENSP00000209728,9606.ENSP00000256442,9606.ENSP00000262300,9606.ENSP00000262643,9606.ENSP00000265148,9606.ENSP00000265728,9606.ENSP00000274026,9606.ENSP00000284440,9606.ENSP00000288207,9606.ENSP00000289707,9606.ENSP00000300093,9606.ENSP00000300403,9606.ENSP00000303634,9606.ENSP00000303706,9606.ENSP00000305651,9606.ENSP00000311083,9606.ENSP00000312995,9606.ENSP00000320147,9606.ENSP00000321656,…	CDC6,CCNB1,PKMYT1,CCNE1,CENPE,DBF4,CCNA2,UCHL1,CCNB2,SLAMF8,PLK1,TPX2,LRP8,CDC25A,CXCL10,CKS1B,CLSPN,EZH2,CDC25C,CD86,CDKN3,BLM,IQGAP3,KIF14,LAMTOR2,FCGR1A,PSRC1,IRAK1,DKK1,CKS2,MST4,INCENP,CDK1,CXCR4,PTPRC,CDKN2A,PBK,CCNE2,ADAM8
GO:0045910	Negative regulation of dna recombination	7	44	0.86	0.0054	9606.ENSP00000244534,9606.ENSP00000244573,9606.ENSP00000261600,9606.ENSP00000264233,9606.ENSP00000307705,9606.ENSP00000330074,9606.ENSP00000347232	HIST1H1D,HIST1H1A,THOC1,POLQ,HIST1H1E,HIST1H1B,BLM
GO:0051781	Positive regulation of cell division	11	117	0.63	0.0054	9606.ENSP00000209728,9606.ENSP00000216911,9606.ENSP00000247191,9606.ENSP00000257934,9606.ENSP00000260363,9606.ENSP00000313950,9606.ENSP00000356319,9606.ENSP00000357189,9606.ENSP00000376306,9606.ENSP00000404190,9606.ENSP00000453403	CDC6,AURKA,DLGAP5,ESPL1,KIF23,AURKB,KIF14,HDGF,CIT,RACGAP1,NUSAP1
GO:0071346	Cellular response to interferon-gamma	13	161	0.57	0.0054	9606.ENSP00000229239,9606.ENSP00000257570,9606.ENSP00000264832,9606.ENSP00000342278,9606.ENSP00000351671,9606.ENSP00000354394,9606.ENSP00000358165,9606.ENSP00000359488,9606.ENSP00000364076,9606.ENSP00000364080,9606.ENSP00000378786,9606.ENSP00000384886,9606.ENSP00000399168	GAPDH,OASL,ICAM1,OAS2,CCL20,STAT1,FCGR1A,GBP5,HLA-DQA2,HLA-DQB1,HLA-DRA,IFI30,HLA-B
GO:0007143	Female meiotic nuclear division	6	30	0.96	0.0056	9606.ENSP00000166345,9606.ENSP00000216911,9606.ENSP00000240423,9606.ENSP00000300093,9606.ENSP00000358813,9606.ENSP00000411532	TRIP13,AURKA,NCAPH,PLK1,TTK,TOP2A
GO:0071459	Protein localization to chromosome, centromeric region	5	18	1.1	0.0056	9606.ENSP00000313950,9606.ENSP00000335463,9606.ENSP00000336868,9606.ENSP00000358813,9606.ENSP00000378699	AURKB,CASC5,CENPA,TTK,CDK1
GO:0033993	Response to lipid	37	858	0.29	0.0058	9606.ENSP00000226279,9606.ENSP00000242208,9606.ENSP00000250092,9606.ENSP00000256442,9606.ENSP00000256722,9606.ENSP00000261623,9606.ENSP00000262643,9606.ENSP00000263181,9606.ENSP00000264246,9606.ENSP00000264832,9606.ENSP00000274026,9606.ENSP00000286758,9606.ENSP00000292303,9606.ENSP00000296417,9606.ENSP00000296503,9606.ENSP00000303634,9606.ENSP00000305651,9606.ENSP00000306512,9606.ENSP00000306884,…	CD38,INHBA,CD68,CCNB1,CMPK2,CYBA,CCNE1,KIF18A,CD80,ICAM1,CCNA2,CXCL13,CCR5,H2AFZ,HMGB2,LRP8,CXCL10,CXCL8,CXCL11,EZH2,CALR,CD86,NME1,EIF4EBP1,E2F1,CXCL9,S100A7,S100A8,IRAK1,DKK1,CYBB,PCNA,SDC1,GJB2,SPP1,IDO1,ACP5
GO:0031324	Negative regulation of cellular metabolic process	86	2630	0.17	0.0059	9606.ENSP00000209728,9606.ENSP00000216117,9606.ENSP00000216341,9606.ENSP00000226279,9606.ENSP00000229239,9606.ENSP00000242208,9606.ENSP00000244534,9606.ENSP00000244573,9606.ENSP00000256442,9606.ENSP00000261600,9606.ENSP00000262300,9606.ENSP00000262643,9606.ENSP00000264233,9606.ENSP00000265340,9606.ENSP00000265440,9606.ENSP00000271638,9606.ENSP00000274306,9606.ENSP00000284440,9606.ENSP00000285670,…	CDC6,HMOX1,GZMB,CD38,GAPDH,INHBA,HIST1H1D,HIST1H1A,CCNB1,THOC1,PKMYT1,CCNE1,POLQ,PITX1,TFEC,S100A11,GZMA,UCHL1,SAMSN1,CSTB,EN1,H2AFZ,HMGB2,MAD2L1,PLK1,BIRC5,CST1,MRPL13,HIST1H1E,CBX2,PPP1R14B,AURKB,EZH2,CALR,SOX11,E2F7,PIF1,HIST1H1B,HIST2H2AB,HIST2H3D,CASC5,PLAUR,EIF4EBP1,HIST1H2AD,ETV7,FOXM1,IFI6,E2F1,SUV39H2,HIST1H4J,BLM,HIST1H2AI,HIST1H2AG,HIST1H3J,STAT1,E2F2,PPP1R14C,HIST3H2A,CENPF,HDGF,HIST2…
GO:0016572	Histone phosphorylation	6	31	0.95	0.0064	9606.ENSP00000216911,9606.ENSP00000256442,9606.ENSP00000274026,9606.ENSP00000313950,9606.ENSP00000378295,9606.ENSP00000378699	AURKA,CCNB1,CCNA2,AURKB,INCENP,CDK1
GO:0071456	Cellular response to hypoxia	14	189	0.53	0.0067	9606.ENSP00000216117,9606.ENSP00000216802,9606.ENSP00000256442,9606.ENSP00000264832,9606.ENSP00000274026,9606.ENSP00000326119,9606.ENSP00000340691,9606.ENSP00000345571,9606.ENSP00000346997,9606.ENSP00000358997,9606.ENSP00000362413,9606.ENSP00000363993,9606.ENSP00000367851,9606.ENSP00000453302	HMOX1,PSME2,CCNB1,ICAM1,CCNA2,PMAIP1,EIF4EBP1,E2F1,SUV39H2,IRAK1,PGK1,PSMB9,CYBB,ADAM8
GO:0010605	Negative regulation of macromolecule metabolic process	92	2875	0.16	0.0068	9606.ENSP00000209728,9606.ENSP00000216117,9606.ENSP00000216341,9606.ENSP00000216911,9606.ENSP00000226279,9606.ENSP00000229239,9606.ENSP00000242208,9606.ENSP00000244534,9606.ENSP00000244573,9606.ENSP00000256442,9606.ENSP00000259396,9606.ENSP00000261600,9606.ENSP00000262629,9606.ENSP00000262643,9606.ENSP00000264233,9606.ENSP00000265340,9606.ENSP00000265440,9606.ENSP00000271638,9606.ENSP00000274306,…	CDC6,HMOX1,GZMB,AURKA,CD38,GAPDH,INHBA,HIST1H1D,HIST1H1A,CCNB1,ORM1,THOC1,TYROBP,CCNE1,POLQ,PITX1,TFEC,S100A11,GZMA,UCHL1,SAMSN1,CSTB,EN1,H2AFZ,HMGB2,MAD2L1,PLK1,BIRC5,CST1,MRPL13,HIST1H1E,CBX2,PPP1R14B,AURKB,EZH2,CALR,SOX11,E2F7,PIF1,HIST1H1B,HIST2H2AB,HIST2H3D,NME1,PLAUR,EIF4EBP1,HIST1H2AD,ETV7,FOXM1,IFI6,E2F1,FN1,SUV39H2,HIST1H4J,BLM,HIST1H2AI,HIST1H2AG,HIST1H3J,STAT1,IQGAP3,E2F2,PPP1R14C,HIST…
GO:0051347	Positive regulation of transferase activity	32	705	0.32	0.0069	9606.ENSP00000209728,9606.ENSP00000256442,9606.ENSP00000264552,9606.ENSP00000265148,9606.ENSP00000265728,9606.ENSP00000300093,9606.ENSP00000300403,9606.ENSP00000303634,9606.ENSP00000311083,9606.ENSP00000312995,9606.ENSP00000313950,9606.ENSP00000320147,9606.ENSP00000332049,9606.ENSP00000348838,9606.ENSP00000354451,9606.ENSP00000355966,9606.ENSP00000356319,9606.ENSP00000357288,9606.ENSP00000358165,…	CDC6,CCNB1,UBE2S,CENPE,DBF4,PLK1,TPX2,LRP8,CKS1B,CLSPN,AURKB,EZH2,CD86,UBE2C,IQGAP3,NEK2,KIF14,LAMTOR2,FCGR1A,PSRC1,IRAK1,CDC20,DKK1,CKS2,PCNA,MST4,INCENP,CDK1,CXCR4,PTPRC,PBK,ADAM8
GO:0044773	Mitotic dna damage checkpoint	10	101	0.65	0.0071	9606.ENSP00000216911,9606.ENSP00000256442,9606.ENSP00000312995,9606.ENSP00000321656,9606.ENSP00000323246,9606.ENSP00000345571,9606.ENSP00000347232,9606.ENSP00000368458,9606.ENSP00000378699,9606.ENSP00000481103	AURKA,CCNB1,CLSPN,CDC25C,E2F7,E2F1,BLM,PCNA,CDK1,E2F8
GO:0006335	DNA replication-dependent nucleosome assembly	6	32	0.93	0.0073	9606.ENSP00000263382,9606.ENSP00000347168,9606.ENSP00000352252,9606.ENSP00000366956,9606.ENSP00000366999,9606.ENSP00000367034	ASF1B,HIST1H4J,HIST1H3J,HIST1H4H,HIST1H3D,HIST1H4C
GO:0009615	Response to virus	18	293	0.45	0.0073	9606.ENSP00000257570,9606.ENSP00000280326,9606.ENSP00000305651,9606.ENSP00000306565,9606.ENSP00000326119,9606.ENSP00000327459,9606.ENSP00000342278,9606.ENSP00000342513,9606.ENSP00000354394,9606.ENSP00000354901,9606.ENSP00000359787,9606.ENSP00000365692,9606.ENSP00000368699,9606.ENSP00000371471,9606.ENSP00000386884,9606.ENSP00000399888,9606.ENSP00000410452,9606.ENSP00000411355	OASL,CCT5,CXCL10,ISG20,PMAIP1,APOBEC3B,OAS2,IFI6,STAT1,CXCL9,IFI44L,PIM2,ISG15,RSAD2,CXCR4,HMGA1,STMN1,PTPRC
GO:0030330	DNA damage response, signal transduction by p53 class mediator	9	82	0.7	0.0073	9606.ENSP00000216911,9606.ENSP00000256442,9606.ENSP00000321656,9606.ENSP00000323246,9606.ENSP00000342307,9606.ENSP00000345571,9606.ENSP00000368458,9606.ENSP00000378699,9606.ENSP00000481103	AURKA,CCNB1,CDC25C,E2F7,FOXM1,E2F1,PCNA,CDK1,E2F8
GO:0045652	Regulation of megakaryocyte differentiation	9	82	0.7	0.0073	9606.ENSP00000296503,9606.ENSP00000333277,9606.ENSP00000347168,9606.ENSP00000352252,9606.ENSP00000358154,9606.ENSP00000366956,9606.ENSP00000366999,9606.ENSP00000367034,9606.ENSP00000385479	HMGB2,HIST2H3D,HIST1H4J,HIST1H3J,HIST2H3C,HIST1H4H,HIST1H3D,HIST1H4C,HIST2H3A
GO:0008283	Cell population proliferation	25	493	0.36	0.0075	9606.ENSP00000216117,9606.ENSP00000262746,9606.ENSP00000284440,9606.ENSP00000298048,9606.ENSP00000302530,9606.ENSP00000303706,9606.ENSP00000311083,9606.ENSP00000313950,9606.ENSP00000321656,9606.ENSP00000322568,9606.ENSP00000326550,9606.ENSP00000354394,9606.ENSP00000356319,9606.ENSP00000356379,9606.ENSP00000357429,9606.ENSP00000357643,9606.ENSP00000364976,9606.ENSP00000377601,9606.ENSP00000378699,…	HMOX1,PRDX1,UCHL1,MELK,BUB1,CDC25A,CKS1B,AURKB,CDC25C,SOX11,TACC3,STAT1,KIF14,ASPM,FABP7,MKI67,CKS2,HELLS,CDK1,RACGAP1,PTPRC,MCM10,MS4A1,E2F8,FAM83D
GO:0009889	Regulation of biosynthetic process	125	4210	0.13	0.0075	9606.ENSP00000166345,9606.ENSP00000209728,9606.ENSP00000216117,9606.ENSP00000216341,9606.ENSP00000216802,9606.ENSP00000217026,9606.ENSP00000225655,9606.ENSP00000226279,9606.ENSP00000229239,9606.ENSP00000240285,9606.ENSP00000242208,9606.ENSP00000244534,9606.ENSP00000244573,9606.ENSP00000247191,9606.ENSP00000261600,9606.ENSP00000261623,9606.ENSP00000262643,9606.ENSP00000263735,9606.ENSP00000264246,…	TRIP13,CDC6,HMOX1,GZMB,PSME2,MYBL2,PFN1,CD38,GAPDH,RDH10,INHBA,HIST1H1D,HIST1H1A,DLGAP5,THOC1,CYBA,CCNE1,EPCAM,CD80,ICAM1,PITX1,TFEC,GAL,DBF4,SQLE,ARNTL2,S100A11,CCNA2,NFKBIE,CCT5,ATAD2,EN1,H2AFZ,HMGB2,PLK1,CD3D,BIRC5,CLEC7A,LRP8,CXCL10,MRPL13,CDCA7,HIST1H1E,CBX2,CKS1B,AURKB,EZH2,CALR,SOX11,E2F7,PIF1,LIN9,HIST1H1B,CD86,HIST2H2AB,HIST2H3D,SHMT2,EIF4EBP1,HIST1H2AD,ETV7,FOXM1,IKZF3,E2F1,SUV39H2,HIST…
GO:0034502	Protein localization to chromosome	8	64	0.76	0.0075	9606.ENSP00000300093,9606.ENSP00000313950,9606.ENSP00000320147,9606.ENSP00000330074,9606.ENSP00000335463,9606.ENSP00000336868,9606.ENSP00000358813,9606.ENSP00000378699	PLK1,AURKB,EZH2,HIST1H1B,CASC5,CENPA,TTK,CDK1
GO:0072331	Signal transduction by p53 class mediator	11	123	0.61	0.0075	9606.ENSP00000216911,9606.ENSP00000256442,9606.ENSP00000321656,9606.ENSP00000323246,9606.ENSP00000326119,9606.ENSP00000342307,9606.ENSP00000345571,9606.ENSP00000355249,9606.ENSP00000368458,9606.ENSP00000378699,9606.ENSP00000481103	AURKA,CCNB1,CDC25C,E2F7,PMAIP1,FOXM1,E2F1,E2F2,PCNA,CDK1,E2F8
GO:0009892	Negative regulation of metabolic process	98	3124	0.16	0.0076	9606.ENSP00000209728,9606.ENSP00000216117,9606.ENSP00000216341,9606.ENSP00000216911,9606.ENSP00000226279,9606.ENSP00000229239,9606.ENSP00000231009,9606.ENSP00000242208,9606.ENSP00000244534,9606.ENSP00000244573,9606.ENSP00000256442,9606.ENSP00000259396,9606.ENSP00000261600,9606.ENSP00000262300,9606.ENSP00000262629,9606.ENSP00000262643,9606.ENSP00000264233,9606.ENSP00000265340,9606.ENSP00000265440,…	CDC6,HMOX1,GZMB,AURKA,CD38,GAPDH,GZMK,INHBA,HIST1H1D,HIST1H1A,CCNB1,ORM1,THOC1,PKMYT1,TYROBP,CCNE1,POLQ,PITX1,TFEC,S100A11,GZMA,UCHL1,SAMSN1,SLAMF8,CSTB,EN1,H2AFZ,HMGB2,MAD2L1,PLK1,BIRC5,CST1,MRPL13,HIST1H1E,CBX2,PPP1R14B,AURKB,EZH2,CALR,SOX11,E2F7,PIF1,HIST1H1B,HIST2H2AB,HIST2H3D,CASC5,NME1,PLAUR,EIF4EBP1,HIST1H2AD,ETV7,FOXM1,IFI6,E2F1,FN1,SUV39H2,HIST1H4J,BLM,HIST1H2AI,HIST1H2AG,HIST1H3J,STAT1,…
GO:0006139	Nucleobase-containing compound metabolic process	86	2659	0.17	0.008	9606.ENSP00000166345,9606.ENSP00000209728,9606.ENSP00000219097,9606.ENSP00000221486,9606.ENSP00000228843,9606.ENSP00000229239,9606.ENSP00000229270,9606.ENSP00000240488,9606.ENSP00000242776,9606.ENSP00000256442,9606.ENSP00000256722,9606.ENSP00000261600,9606.ENSP00000262105,9606.ENSP00000262643,9606.ENSP00000264233,9606.ENSP00000264596,9606.ENSP00000265056,9606.ENSP00000272348,9606.ENSP00000275517,…	TRIP13,CDC6,ORC6,RNASEH2A,RAD51AP1,GAPDH,TPI1,MND1,DDX39A,CCNB1,CMPK2,THOC1,MCM4,CCNE1,POLQ,NEIL3,MCM2,SNRPG,CDCA5,HMGB2,KIAA0101,TK1,FEN1,ISG20,FANCI,CLSPN,GEN1,EZH2,DCTPP1,APOBEC3B,PIF1,LIN9,IDH2,NME1,ETV7,OAS2,FOXM1,E2F1,HIST1H4J,BLM,LAGE3,RRM2,WDHD1,PNP,ILF2,HORMAD1,E2F2,EXO1,HIST3H2A,CENPF,DTL,UBE2T,HMGB3,ORC1,RAD54L,PGK1,SRPK1,HIST1H4H,HIST1H4C,PCNA,ISG15,RAD51,FANCA,PTTG1,HELLS,CDK1,TYMP,C…
GO:0051172	Negative regulation of nitrogen compound metabolic process	80	2429	0.18	0.0081	9606.ENSP00000216341,9606.ENSP00000226279,9606.ENSP00000229239,9606.ENSP00000244534,9606.ENSP00000244573,9606.ENSP00000256442,9606.ENSP00000261600,9606.ENSP00000262643,9606.ENSP00000264233,9606.ENSP00000265340,9606.ENSP00000265440,9606.ENSP00000274306,9606.ENSP00000284440,9606.ENSP00000285670,9606.ENSP00000291568,9606.ENSP00000295206,9606.ENSP00000296417,9606.ENSP00000296503,9606.ENSP00000296509,…	GZMB,CD38,GAPDH,HIST1H1D,HIST1H1A,CCNB1,THOC1,CCNE1,POLQ,PITX1,TFEC,GZMA,UCHL1,SAMSN1,CSTB,EN1,H2AFZ,HMGB2,MAD2L1,PLK1,BIRC5,CST1,MRPL13,HIST1H1E,CBX2,PPP1R14B,AURKB,EZH2,CALR,SOX11,E2F7,PIF1,HIST1H1B,HIST2H2AB,HIST2H3D,PLAUR,EIF4EBP1,HIST1H2AD,ETV7,FOXM1,IFI6,E2F1,SUV39H2,HIST1H4J,BLM,HIST1H2AI,HIST1H2AG,HIST1H3J,STAT1,E2F2,PPP1R14C,HIST3H2A,CENPF,HDGF,HIST2H3C,HIST2H2AA,MMP9,DKK1,HIST1H4H,HIST1…
GO:0071158	Positive regulation of cell cycle arrest	9	84	0.69	0.0084	9606.ENSP00000216911,9606.ENSP00000256442,9606.ENSP00000321656,9606.ENSP00000323246,9606.ENSP00000345571,9606.ENSP00000368458,9606.ENSP00000378699,9606.ENSP00000418915,9606.ENSP00000481103	AURKA,CCNB1,CDC25C,E2F7,E2F1,PCNA,CDK1,CDKN2A,E2F8
GO:0071396	Cellular response to lipid	26	528	0.35	0.0085	9606.ENSP00000242208,9606.ENSP00000250092,9606.ENSP00000256442,9606.ENSP00000256722,9606.ENSP00000262643,9606.ENSP00000263181,9606.ENSP00000264246,9606.ENSP00000264832,9606.ENSP00000274026,9606.ENSP00000286758,9606.ENSP00000292303,9606.ENSP00000296417,9606.ENSP00000296503,9606.ENSP00000303634,9606.ENSP00000305651,9606.ENSP00000306512,9606.ENSP00000306884,9606.ENSP00000320866,9606.ENSP00000332049,…	INHBA,CD68,CCNB1,CMPK2,CCNE1,KIF18A,CD80,ICAM1,CCNA2,CXCL13,CCR5,H2AFZ,HMGB2,LRP8,CXCL10,CXCL8,CXCL11,CALR,CD86,NME1,EIF4EBP1,E2F1,CXCL9,IRAK1,GJB2,SPP1
GO:0019219	Regulation of nucleobase-containing compound metabolic process	119	3982	0.13	0.0087	9606.ENSP00000166345,9606.ENSP00000209728,9606.ENSP00000216117,9606.ENSP00000216802,9606.ENSP00000217026,9606.ENSP00000225655,9606.ENSP00000226279,9606.ENSP00000228843,9606.ENSP00000242208,9606.ENSP00000244534,9606.ENSP00000244573,9606.ENSP00000247191,9606.ENSP00000256442,9606.ENSP00000257570,9606.ENSP00000261600,9606.ENSP00000262643,9606.ENSP00000263735,9606.ENSP00000264233,9606.ENSP00000264246,…	TRIP13,CDC6,HMOX1,PSME2,MYBL2,PFN1,CD38,RAD51AP1,INHBA,HIST1H1D,HIST1H1A,DLGAP5,CCNB1,OASL,THOC1,CCNE1,EPCAM,POLQ,CD80,ICAM1,PITX1,TFEC,GAL,ARNTL2,CCNA2,GZMA,NFKBIE,PPP4C,CCT5,ATAD2,EN1,H2AFZ,HMGB2,PLK1,CD3D,BIRC5,LRP8,CXCL10,CDCA7,HIST1H1E,CBX2,CKS1B,AURKB,EZH2,CALR,SOX11,E2F7,PIF1,LIN9,HIST1H1B,CD86,HIST2H2AB,HIST2H3D,HIST1H2AD,ETV7,OAS2,FOXM1,IKZF3,E2F1,SUV39H2,HIST1H4J,BLM,LAGE3,HIST1H2AI,HIS…
GO:0006915	Apoptotic process	38	918	0.28	0.0096	9606.ENSP00000216117,9606.ENSP00000216341,9606.ENSP00000226279,9606.ENSP00000229239,9606.ENSP00000242208,9606.ENSP00000257934,9606.ENSP00000261600,9606.ENSP00000262629,9606.ENSP00000265056,9606.ENSP00000266263,9606.ENSP00000267953,9606.ENSP00000274306,9606.ENSP00000275428,9606.ENSP00000287598,9606.ENSP00000296503,9606.ENSP00000298048,9606.ENSP00000300403,9606.ENSP00000301633,9606.ENSP00000302530,…	HMOX1,GZMB,CD38,GAPDH,INHBA,ESPL1,THOC1,TYROBP,MCM2,MTFP1,BCL2A1,GZMA,GGCT,BUB1B,HMGB2,MELK,TPX2,BIRC5,BUB1,CDCA7,PMAIP1,IFI6,CTSL,E2F1,E2F2,S100A8,S100A9,CD2,PIM2,CKAP2,CIT,MST4,CDK1,CXCR4,HTATIP2,TOP2A,CDKN2A,PRAME
GO:0006355	Regulation of transcription, dna-templated	104	3388	0.15	0.0097	9606.ENSP00000209728,9606.ENSP00000216117,9606.ENSP00000216802,9606.ENSP00000217026,9606.ENSP00000225655,9606.ENSP00000226279,9606.ENSP00000242208,9606.ENSP00000244534,9606.ENSP00000244573,9606.ENSP00000247191,9606.ENSP00000261600,9606.ENSP00000262643,9606.ENSP00000263735,9606.ENSP00000264246,9606.ENSP00000264832,9606.ENSP00000265340,9606.ENSP00000265440,9606.ENSP00000265643,9606.ENSP00000266503,…	CDC6,HMOX1,PSME2,MYBL2,PFN1,CD38,INHBA,HIST1H1D,HIST1H1A,DLGAP5,THOC1,CCNE1,EPCAM,CD80,ICAM1,PITX1,TFEC,GAL,ARNTL2,CCNA2,NFKBIE,ATAD2,EN1,H2AFZ,HMGB2,PLK1,CD3D,BIRC5,LRP8,CXCL10,CDCA7,HIST1H1E,CBX2,CKS1B,AURKB,EZH2,CALR,SOX11,E2F7,LIN9,HIST1H1B,CD86,HIST2H2AB,HIST2H3D,HIST1H2AD,ETV7,FOXM1,IKZF3,E2F1,SUV39H2,HIST1H4J,BLM,LAGE3,HIST1H2AI,HIST1H2AG,HIST1H3J,RRM2,STAT1,ILF2,E2F2,HIST3H2A,CENPF,HDGF,S…
GO:0050864	Regulation of b cell activation	11	128	0.59	0.0098	9606.ENSP00000226279,9606.ENSP00000242208,9606.ENSP00000261600,9606.ENSP00000262629,9606.ENSP00000285670,9606.ENSP00000289707,9606.ENSP00000303939,9606.ENSP00000344544,9606.ENSP00000359393,9606.ENSP00000411355,9606.ENSP00000418915	CD38,INHBA,THOC1,TYROBP,SAMSN1,SLAMF8,CTLA4,IKZF3,HMGB3,PTPRC,CDKN2A
GO:1901701	Cellular response to oxygen-containing compound	42	1055	0.26	0.0098	9606.ENSP00000209728,9606.ENSP00000219919,9606.ENSP00000242208,9606.ENSP00000250092,9606.ENSP00000256442,9606.ENSP00000256722,9606.ENSP00000261623,9606.ENSP00000262746,9606.ENSP00000263181,9606.ENSP00000264246,9606.ENSP00000264832,9606.ENSP00000274026,9606.ENSP00000286758,9606.ENSP00000292303,9606.ENSP00000296417,9606.ENSP00000296503,9606.ENSP00000302569,9606.ENSP00000303634,9606.ENSP00000305651,…	CDC6,AQP9,INHBA,CD68,CCNB1,CMPK2,CYBA,PRDX1,KIF18A,CD80,ICAM1,CCNA2,CXCL13,CCR5,H2AFZ,HMGB2,CLEC7A,LRP8,CXCL10,CXCL8,CXCL11,EZH2,CD86,SHMT2,NME1,EIF4EBP1,E2F1,BLM,STAT1,CXCL9,LAMTOR2,IRAK1,MMP9,CYBB,PCNA,RAD51,GJB2,SPP1,CDK1,ATP6V0B,DDX11,TIMELESS
GO:0071704	Organic substance metabolic process	207	7755	0.09	0.0099	9606.ENSP00000005286,9606.ENSP00000166345,9606.ENSP00000209728,9606.ENSP00000215743,9606.ENSP00000216117,9606.ENSP00000216341,9606.ENSP00000216802,9606.ENSP00000216911,9606.ENSP00000219097,9606.ENSP00000221486,9606.ENSP00000228843,9606.ENSP00000229238,9606.ENSP00000229239,9606.ENSP00000229270,9606.ENSP00000231009,9606.ENSP00000236671,9606.ENSP00000240285,9606.ENSP00000240488,9606.ENSP00000242208,…	TMEM132A,TRIP13,CDC6,MMP11,HMOX1,GZMB,PSME2,AURKA,ORC6,RNASEH2A,RAD51AP1,MRPL51,GAPDH,TPI1,GZMK,CTSD,RDH10,MND1,INHBA,DDX39A,HIST1H1D,ADAMDEC1,CCNB1,CMPK2,ESPL1,CLPS,MRPL15,GGH,LYZ,THOC1,MCM4,PKMYT1,CCNE1,POLQ,UBE2S,NEIL3,MCM2,DBF4,SQLE,PLK4,SNRPG,CCNA2,GZMA,PLA2G7,GGCT,CDCA5,FADS2,PPP4C,UCHL1,BUB1B,HIST1H2BD,FCER1G,CCR5,HMGB2,MAD2L1,MELK,KIAA0101,PLK1,BIRC5,TK1,BUB1,LRP8,CDC25A,FEN1,CXCL8,MRPL13…
GO:0051701	Interaction with host	12	151	0.56	0.01	9606.ENSP00000229239,9606.ENSP00000261600,9606.ENSP00000264246,9606.ENSP00000264832,9606.ENSP00000292303,9606.ENSP00000332049,9606.ENSP00000345672,9606.ENSP00000378699,9606.ENSP00000386884,9606.ENSP00000436768,9606.ENSP00000438483,9606.ENSP00000449999	GAPDH,THOC1,CD80,ICAM1,CCR5,CD86,CTSB,CDK1,CXCR4,SLC52A2,KPNA2,CLEC5A
GO:2000112	Regulation of cellular macromolecule biosynthetic process	116	3878	0.13	0.0101	9606.ENSP00000209728,9606.ENSP00000216117,9606.ENSP00000216341,9606.ENSP00000216802,9606.ENSP00000217026,9606.ENSP00000225655,9606.ENSP00000226279,9606.ENSP00000229239,9606.ENSP00000242208,9606.ENSP00000244534,9606.ENSP00000244573,9606.ENSP00000247191,9606.ENSP00000261600,9606.ENSP00000262643,9606.ENSP00000263735,9606.ENSP00000264246,9606.ENSP00000264832,9606.ENSP00000265340,9606.ENSP00000265440,…	CDC6,HMOX1,GZMB,PSME2,MYBL2,PFN1,CD38,GAPDH,INHBA,HIST1H1D,HIST1H1A,DLGAP5,THOC1,CCNE1,EPCAM,CD80,ICAM1,PITX1,TFEC,GAL,DBF4,ARNTL2,S100A11,CCNA2,NFKBIE,CCT5,ATAD2,EN1,H2AFZ,HMGB2,PLK1,CD3D,BIRC5,LRP8,CXCL10,MRPL13,CDCA7,HIST1H1E,CBX2,CKS1B,AURKB,EZH2,CALR,SOX11,E2F7,PIF1,LIN9,HIST1H1B,CD86,HIST2H2AB,HIST2H3D,SHMT2,EIF4EBP1,HIST1H2AD,ETV7,FOXM1,IKZF3,E2F1,SUV39H2,HIST1H4J,BLM,LAGE3,HIST1H2AI,HIST1…
GO:2000134	Negative regulation of g1/s transition of mitotic cell cycle	10	107	0.63	0.0101	9606.ENSP00000216911,9606.ENSP00000256442,9606.ENSP00000320147,9606.ENSP00000321656,9606.ENSP00000323246,9606.ENSP00000345571,9606.ENSP00000368458,9606.ENSP00000378699,9606.ENSP00000418915,9606.ENSP00000481103	AURKA,CCNB1,EZH2,CDC25C,E2F7,E2F1,PCNA,CDK1,CDKN2A,E2F8
GO:0008152	Metabolic process	219	8298	0.08	0.0103	9606.ENSP00000005286,9606.ENSP00000166345,9606.ENSP00000209728,9606.ENSP00000215743,9606.ENSP00000216117,9606.ENSP00000216341,9606.ENSP00000216802,9606.ENSP00000216911,9606.ENSP00000219097,9606.ENSP00000221486,9606.ENSP00000226279,9606.ENSP00000228843,9606.ENSP00000229238,9606.ENSP00000229239,9606.ENSP00000229270,9606.ENSP00000231009,9606.ENSP00000236671,9606.ENSP00000240285,9606.ENSP00000240488,…	TMEM132A,TRIP13,CDC6,MMP11,HMOX1,GZMB,PSME2,AURKA,ORC6,RNASEH2A,CD38,RAD51AP1,MRPL51,GAPDH,TPI1,GZMK,CTSD,RDH10,MND1,INHBA,DDX39A,HIST1H1D,ADAMDEC1,CCNB1,CMPK2,ESPL1,CLPS,MRPL15,GGH,LYZ,THOC1,CYBA,MCM4,PKMYT1,CCNE1,PRDX1,POLQ,UBE2S,NEIL3,MCM2,DBF4,SQLE,PLK4,SNRPG,CCNA2,GZMA,PLA2G7,GGCT,CDCA5,FADS2,PPP4C,UCHL1,PDIA4,BUB1B,HIST1H2BD,FCER1G,CCR5,HMGB2,MAD2L1,MELK,KIAA0101,PLK1,BIRC5,TK1,BUB1,LRP8,CD…
GO:0031326	Regulation of cellular biosynthetic process	122	4125	0.13	0.0103	9606.ENSP00000166345,9606.ENSP00000209728,9606.ENSP00000216117,9606.ENSP00000216341,9606.ENSP00000216802,9606.ENSP00000217026,9606.ENSP00000225655,9606.ENSP00000226279,9606.ENSP00000229239,9606.ENSP00000240285,9606.ENSP00000242208,9606.ENSP00000244534,9606.ENSP00000244573,9606.ENSP00000247191,9606.ENSP00000261600,9606.ENSP00000262643,9606.ENSP00000263735,9606.ENSP00000264246,9606.ENSP00000264832,…	TRIP13,CDC6,HMOX1,GZMB,PSME2,MYBL2,PFN1,CD38,GAPDH,RDH10,INHBA,HIST1H1D,HIST1H1A,DLGAP5,THOC1,CCNE1,EPCAM,CD80,ICAM1,PITX1,TFEC,GAL,DBF4,ARNTL2,S100A11,CCNA2,NFKBIE,CCT5,ATAD2,EN1,H2AFZ,HMGB2,PLK1,CD3D,BIRC5,CLEC7A,LRP8,CXCL10,MRPL13,CDCA7,HIST1H1E,CBX2,CKS1B,AURKB,EZH2,CALR,SOX11,E2F7,PIF1,LIN9,HIST1H1B,CD86,HIST2H2AB,HIST2H3D,SHMT2,EIF4EBP1,HIST1H2AD,ETV7,FOXM1,IKZF3,E2F1,SUV39H2,HIST1H4J,BLM,L…
GO:0042325	Regulation of phosphorylation	58	1626	0.21	0.0103	9606.ENSP00000209728,9606.ENSP00000242208,9606.ENSP00000256442,9606.ENSP00000262300,9606.ENSP00000262643,9606.ENSP00000262746,9606.ENSP00000264246,9606.ENSP00000264832,9606.ENSP00000265148,9606.ENSP00000265728,9606.ENSP00000274026,9606.ENSP00000284440,9606.ENSP00000285670,9606.ENSP00000288207,9606.ENSP00000289707,9606.ENSP00000300093,9606.ENSP00000300403,9606.ENSP00000303634,9606.ENSP00000303706,…	CDC6,INHBA,CCNB1,PKMYT1,CCNE1,PRDX1,CD80,ICAM1,CENPE,DBF4,CCNA2,UCHL1,SAMSN1,CCNB2,SLAMF8,PLK1,TPX2,LRP8,CDC25A,CXCL10,PPP1R14B,CKS1B,CLSPN,MARCO,EZH2,CDC25C,CD86,SHMT2,CDKN3,PLAUR,FOXM1,FN1,BLM,CCL20,IQGAP3,PPP1R14C,KIF14,LAMTOR2,S100A7,FCGR1A,TTK,PSRC1,IRAK1,MMP9,PGK1,DKK1,CKS2,RAD51,MST4,INCENP,CDK1,CXCR4,PTPRC,CDKN2A,PBK,CCNE2,ADAM8,FAM83D
GO:0090329	Regulation of dna-dependent dna replication	7	51	0.8	0.0107	9606.ENSP00000265728,9606.ENSP00000323246,9606.ENSP00000347232,9606.ENSP00000368458,9606.ENSP00000393139,9606.ENSP00000450607,9606.ENSP00000481103	DBF4,E2F7,BLM,PCNA,CDC7,TIMELESS,E2F8
GO:0000727	Double-strand break repair via break-induced replication	4	11	1.22	0.0108	9606.ENSP00000262105,9606.ENSP00000265056,9606.ENSP00000393139,9606.ENSP00000405726	MCM4,MCM2,CDC7,CDC45
GO:0051315	Attachment of mitotic spindle microtubules to kinetochore	4	11	1.22	0.0108	9606.ENSP00000261597,9606.ENSP00000265148,9606.ENSP00000271452,9606.ENSP00000361298	NDC80,CENPE,NUF2,KIF2C
GO:1902969	Mitotic dna replication	4	11	1.22	0.0108	9606.ENSP00000262105,9606.ENSP00000265056,9606.ENSP00000372088,9606.ENSP00000405726	MCM4,MCM2,RAD51,CDC45
GO:0007063	Regulation of sister chromatid cohesion	5	22	1.02	0.011	9606.ENSP00000257934,9606.ENSP00000275517,9606.ENSP00000302530,9606.ENSP00000305480,9606.ENSP00000440402	ESPL1,CDCA5,BUB1,FEN1,DDX11
GO:1903506	Regulation of nucleic acid-templated transcription	105	3447	0.14	0.0114	9606.ENSP00000166345,9606.ENSP00000209728,9606.ENSP00000216117,9606.ENSP00000216802,9606.ENSP00000217026,9606.ENSP00000225655,9606.ENSP00000226279,9606.ENSP00000242208,9606.ENSP00000244534,9606.ENSP00000244573,9606.ENSP00000247191,9606.ENSP00000261600,9606.ENSP00000262643,9606.ENSP00000263735,9606.ENSP00000264246,9606.ENSP00000264832,9606.ENSP00000265340,9606.ENSP00000265440,9606.ENSP00000265643,…	TRIP13,CDC6,HMOX1,PSME2,MYBL2,PFN1,CD38,INHBA,HIST1H1D,HIST1H1A,DLGAP5,THOC1,CCNE1,EPCAM,CD80,ICAM1,PITX1,TFEC,GAL,ARNTL2,CCNA2,NFKBIE,ATAD2,EN1,H2AFZ,HMGB2,PLK1,CD3D,BIRC5,LRP8,CXCL10,CDCA7,HIST1H1E,CBX2,CKS1B,AURKB,EZH2,CALR,SOX11,E2F7,LIN9,HIST1H1B,CD86,HIST2H2AB,HIST2H3D,HIST1H2AD,ETV7,FOXM1,IKZF3,E2F1,SUV39H2,HIST1H4J,BLM,LAGE3,HIST1H2AI,HIST1H2AG,HIST1H3J,RRM2,STAT1,ILF2,E2F2,HIST3H2A,CENPF…
GO:1901700	Response to oxygen-containing compound	56	1567	0.21	0.0123	9606.ENSP00000209728,9606.ENSP00000216117,9606.ENSP00000219919,9606.ENSP00000226279,9606.ENSP00000236147,9606.ENSP00000242208,9606.ENSP00000250092,9606.ENSP00000256442,9606.ENSP00000256722,9606.ENSP00000260118,9606.ENSP00000261623,9606.ENSP00000262746,9606.ENSP00000263181,9606.ENSP00000264246,9606.ENSP00000264832,9606.ENSP00000265643,9606.ENSP00000274026,9606.ENSP00000286758,9606.ENSP00000292303,…	CDC6,HMOX1,AQP9,CD38,SELL,INHBA,CD68,CCNB1,CMPK2,GGH,CYBA,PRDX1,KIF18A,CD80,ICAM1,GAL,CCNA2,CXCL13,CCR5,H2AFZ,HMGB2,CLEC7A,LRP8,CXCL10,CXCL8,CXCL11,EZH2,CALR,CD86,SHMT2,NME1,EIF4EBP1,E2F1,BLM,STAT1,CXCL9,LAMTOR2,S100A7,S100A8,IRAK1,MMP9,DKK1,CYBB,PCNA,SDC1,RAD51,GJB2,MST4,SPP1,CDK1,IDO1,ATP6V0B,DDX11,TDO2,TIMELESS,ACP5
GO:0001932	Regulation of protein phosphorylation	53	1459	0.22	0.0124	9606.ENSP00000209728,9606.ENSP00000242208,9606.ENSP00000256442,9606.ENSP00000262300,9606.ENSP00000262643,9606.ENSP00000262746,9606.ENSP00000264246,9606.ENSP00000264832,9606.ENSP00000265148,9606.ENSP00000265728,9606.ENSP00000274026,9606.ENSP00000284440,9606.ENSP00000285670,9606.ENSP00000288207,9606.ENSP00000300093,9606.ENSP00000300403,9606.ENSP00000303634,9606.ENSP00000303706,9606.ENSP00000305651,…	CDC6,INHBA,CCNB1,PKMYT1,CCNE1,PRDX1,CD80,ICAM1,CENPE,DBF4,CCNA2,UCHL1,SAMSN1,CCNB2,PLK1,TPX2,LRP8,CDC25A,CXCL10,CKS1B,CLSPN,MARCO,EZH2,CDC25C,CD86,CDKN3,PLAUR,FOXM1,FN1,BLM,CCL20,IQGAP3,KIF14,LAMTOR2,S100A7,FCGR1A,TTK,PSRC1,IRAK1,MMP9,DKK1,CKS2,RAD51,MST4,INCENP,CDK1,CXCR4,PTPRC,CDKN2A,PBK,CCNE2,ADAM8,FAM83D
GO:0050778	Positive regulation of immune response	28	607	0.32	0.0124	9606.ENSP00000216802,9606.ENSP00000226279,9606.ENSP00000264246,9606.ENSP00000289902,9606.ENSP00000296503,9606.ENSP00000300692,9606.ENSP00000303939,9606.ENSP00000313967,9606.ENSP00000332049,9606.ENSP00000341821,9606.ENSP00000356946,9606.ENSP00000358165,9606.ENSP00000359393,9606.ENSP00000359488,9606.ENSP00000363773,9606.ENSP00000363993,9606.ENSP00000364076,9606.ENSP00000364080,9606.ENSP00000371471,…	PSME2,CD38,CD80,FCER1G,HMGB2,CD3D,CTLA4,C1QB,CD86,FPR3,FCGR3A,FCGR1A,HMGB3,GBP5,C1QA,PSMB9,HLA-DQA2,HLA-DQB1,RSAD2,HLA-DRA,PPAPDC1A,HLA-DMB,HLA-B,PTPRC,FYB,IDO1,MS4A1,ADAM8
GO:0070925	Organelle assembly	32	735	0.3	0.0124	9606.ENSP00000216911,9606.ENSP00000217026,9606.ENSP00000219150,9606.ENSP00000260363,9606.ENSP00000260731,9606.ENSP00000265148,9606.ENSP00000265748,9606.ENSP00000265896,9606.ENSP00000270861,9606.ENSP00000296484,9606.ENSP00000300093,9606.ENSP00000300403,9606.ENSP00000301633,9606.ENSP00000313950,9606.ENSP00000335357,9606.ENSP00000335463,9606.ENSP00000336868,9606.ENSP00000355922,9606.ENSP00000355966,…	AURKA,MYBL2,CORO1A,KIF23,KIF11,CENPE,ANLN,SQLE,PLK4,POC1A,PLK1,TPX2,BIRC5,AURKB,CDKN3,CASC5,CENPA,CENPF,NEK2,ASPM,CENPW,CDC20,RCC1,KIF4A,CENPN,PRC1,INCENP,CDK1,WDR62,KIFC1,RACGAP1,LSM4
GO:0032506	Cytokinetic process	6	37	0.87	0.0129	9606.ENSP00000260363,9606.ENSP00000265748,9606.ENSP00000313950,9606.ENSP00000360540,9606.ENSP00000378356,9606.ENSP00000404190	KIF23,ANLN,AURKB,CEP55,KIF20A,RACGAP1
GO:1902105	Regulation of leukocyte differentiation	17	285	0.43	0.0134	9606.ENSP00000242208,9606.ENSP00000262629,9606.ENSP00000264246,9606.ENSP00000289707,9606.ENSP00000303939,9606.ENSP00000332049,9606.ENSP00000337060,9606.ENSP00000344544,9606.ENSP00000354532,9606.ENSP00000358490,9606.ENSP00000359393,9606.ENSP00000373952,9606.ENSP00000375616,9606.ENSP00000399168,9606.ENSP00000411355,9606.ENSP00000418915,9606.ENSP00000453302	INHBA,TYROBP,CD80,SLAMF8,CTLA4,CD86,NME1,IKZF3,PNP,CD2,HMGB3,FANCA,LILRB4,HLA-B,PTPRC,CDKN2A,ADAM8
GO:0007077	Mitotic nuclear envelope disassembly	4	12	1.18	0.0136	9606.ENSP00000256442,9606.ENSP00000288207,9606.ENSP00000300093,9606.ENSP00000378699	CCNB1,CCNB2,PLK1,CDK1
GO:0007166	Cell surface receptor signaling pathway	76	2325	0.17	0.0136	9606.ENSP00000216117,9606.ENSP00000216802,9606.ENSP00000219150,9606.ENSP00000225655,9606.ENSP00000226279,9606.ENSP00000242208,9606.ENSP00000247191,9606.ENSP00000250160,9606.ENSP00000257570,9606.ENSP00000261366,9606.ENSP00000261623,9606.ENSP00000262629,9606.ENSP00000262643,9606.ENSP00000264246,9606.ENSP00000264832,9606.ENSP00000267953,9606.ENSP00000286758,9606.ENSP00000289902,9606.ENSP00000292303,…	HMOX1,PSME2,CORO1A,PFN1,CD38,INHBA,DLGAP5,WISP1,OASL,LMNB1,CYBA,TYROBP,CCNE1,CD80,ICAM1,BCL2A1,CXCL13,FCER1G,CCR5,CD3D,BIRC5,LRP8,CTLA4,CXCL10,SHCBP1,CXCL8,ISG20,BOLA2B,CXCL11,MARCO,MMP1,CTHRC1,BOLA2,CD86,HIST2H3D,PLAUR,EIF4EBP1,FPR3,OAS2,IFI6,FN1,CCL20,HIST1H3J,STAT1,CXCL9,FCGR3A,HIST2H3C,FCGR1A,CD2,IRAK1,STIL,MMP9,DKK1,PSMB9,HLA-DQA2,HLA-DQB1,HIST1H3D,CYBB,ISG15,SDC1,RSAD2,HLA-DRA,PPAPDC1A,LCP1…
GO:0032496	Response to lipopolysaccharide	18	313	0.42	0.0136	9606.ENSP00000250092,9606.ENSP00000256722,9606.ENSP00000264246,9606.ENSP00000264832,9606.ENSP00000286758,9606.ENSP00000292303,9606.ENSP00000296503,9606.ENSP00000305651,9606.ENSP00000306512,9606.ENSP00000306884,9606.ENSP00000332049,9606.ENSP00000354901,9606.ENSP00000357712,9606.ENSP00000357722,9606.ENSP00000358997,9606.ENSP00000372295,9606.ENSP00000430950,9606.ENSP00000468767	CD68,CMPK2,CD80,ICAM1,CXCL13,CCR5,HMGB2,CXCL10,CXCL8,CXCL11,CD86,CXCL9,S100A7,S100A8,IRAK1,GJB2,IDO1,ACP5
GO:2000105	Positive regulation of dna-dependent dna replication	4	12	1.18	0.0136	9606.ENSP00000265728,9606.ENSP00000323246,9606.ENSP00000393139,9606.ENSP00000481103	DBF4,E2F7,CDC7,E2F8
GO:0010972	Negative regulation of g2/m transition of mitotic cell cycle	9	92	0.65	0.0141	9606.ENSP00000209728,9606.ENSP00000216802,9606.ENSP00000216911,9606.ENSP00000312995,9606.ENSP00000313950,9606.ENSP00000347232,9606.ENSP00000360623,9606.ENSP00000363993,9606.ENSP00000378699	CDC6,PSME2,AURKA,CLSPN,AURKB,BLM,ORC1,PSMB9,CDK1
GO:0045637	Regulation of myeloid cell differentiation	16	260	0.45	0.0143	9606.ENSP00000242208,9606.ENSP00000262629,9606.ENSP00000296503,9606.ENSP00000333277,9606.ENSP00000337060,9606.ENSP00000347168,9606.ENSP00000352252,9606.ENSP00000354394,9606.ENSP00000358154,9606.ENSP00000359393,9606.ENSP00000366956,9606.ENSP00000366999,9606.ENSP00000367034,9606.ENSP00000368699,9606.ENSP00000375616,9606.ENSP00000385479	INHBA,TYROBP,HMGB2,HIST2H3D,NME1,HIST1H4J,HIST1H3J,STAT1,HIST2H3C,HMGB3,HIST1H4H,HIST1H3D,HIST1H4C,ISG15,LILRB4,HIST2H3A
GO:0065009	Regulation of molecular function	140	4913	0.11	0.0143	9606.ENSP00000166345,9606.ENSP00000209728,9606.ENSP00000216117,9606.ENSP00000216802,9606.ENSP00000216911,9606.ENSP00000217026,9606.ENSP00000225655,9606.ENSP00000229239,9606.ENSP00000231009,9606.ENSP00000233893,9606.ENSP00000236671,9606.ENSP00000240423,9606.ENSP00000242208,9606.ENSP00000256442,9606.ENSP00000257570,9606.ENSP00000259938,9606.ENSP00000261623,9606.ENSP00000262300,9606.ENSP00000262643,…	TRIP13,CDC6,HMOX1,PSME2,AURKA,MYBL2,PFN1,GAPDH,GZMK,HSPE1,CTSD,NCAPH,INHBA,CCNB1,OASL,CLPS,CYBA,PKMYT1,CCNE1,UBE2S,ICAM1,MCM2,CENPE,PITX1,TFEC,GAL,DBF4,ARNTL2,CCNA2,GZMA,NFKBIE,CDCA5,PPP4C,UCHL1,CXCL13,CCNB2,SLAMF8,CSTB,EN1,HMGB2,MAD2L1,PLK1,TPX2,CD3D,BIRC5,CLEC7A,LRP8,CDC25A,CXCL10,CST1,CXCL8,CXCL11,PPP1R14B,CKS1B,CLSPN,AURKB,EZH2,CDC25C,SOX11,E2F7,PMAIP1,PIF1,CTHRC1,CD86,CDKN3,CASC5,NME1,PLAUR,…
GO:0051098	Regulation of binding	20	373	0.39	0.0151	9606.ENSP00000216117,9606.ENSP00000216911,9606.ENSP00000274306,9606.ENSP00000275517,9606.ENSP00000296503,9606.ENSP00000300093,9606.ENSP00000313950,9606.ENSP00000322568,9606.ENSP00000330523,9606.ENSP00000337060,9606.ENSP00000339328,9606.ENSP00000345571,9606.ENSP00000355966,9606.ENSP00000361405,9606.ENSP00000363081,9606.ENSP00000365692,9606.ENSP00000410452,9606.ENSP00000414109,9606.ENSP00000432218,…	HMOX1,AURKA,GZMA,CDCA5,HMGB2,PLK1,AURKB,SOX11,CTHRC1,NME1,PLAUR,E2F1,NEK2,MMP9,DKK1,PIM2,STMN1,HJURP,IL32,DDX11
GO:0051649	Establishment of localization in cell	77	2375	0.17	0.0155	9606.ENSP00000219150,9606.ENSP00000236147,9606.ENSP00000236671,9606.ENSP00000242776,9606.ENSP00000247191,9606.ENSP00000250092,9606.ENSP00000256442,9606.ENSP00000257934,9606.ENSP00000259396,9606.ENSP00000260118,9606.ENSP00000260363,9606.ENSP00000261267,9606.ENSP00000261597,9606.ENSP00000261600,9606.ENSP00000261623,9606.ENSP00000262428,9606.ENSP00000262629,9606.ENSP00000263181,9606.ENSP00000265148,…	CORO1A,SELL,CTSD,DDX39A,DLGAP5,CD68,CCNB1,ESPL1,ORM1,GGH,KIF23,LYZ,NDC80,THOC1,CYBA,COTL1,TYROBP,KIF18A,CENPE,CD53,NUF2,S100A11,SNRPG,CDCA5,UCHL1,FCER1G,CSTB,CCR5,S100P,MAD2L1,PLK1,TUBA1C,BIRC5,CALR,PMAIP1,CENPA,PLAUR,YIF1B,CTSB,TAP1,FN1,PNP,ILF2,CENPF,KIF14,LAMTOR2,S100A7,S100A8,S100A9,CTSS,PSRC1,KIF2C,MMP9,PLAU,CDCA8,ZWINT,KIF4A,TAP2,CYBB,PRDX4,CALML5,INCENP,SAPCD2,SEC61G,HTATIP2,KIFC1,HLA-B,HM…
GO:0044237	Cellular metabolic process	200	7513	0.08	0.0156	9606.ENSP00000005286,9606.ENSP00000166345,9606.ENSP00000209728,9606.ENSP00000216117,9606.ENSP00000216802,9606.ENSP00000216911,9606.ENSP00000219097,9606.ENSP00000221486,9606.ENSP00000228843,9606.ENSP00000229238,9606.ENSP00000229239,9606.ENSP00000229270,9606.ENSP00000240285,9606.ENSP00000240488,9606.ENSP00000242208,9606.ENSP00000242776,9606.ENSP00000244534,9606.ENSP00000256442,9606.ENSP00000256722,…	TMEM132A,TRIP13,CDC6,HMOX1,PSME2,AURKA,ORC6,RNASEH2A,RAD51AP1,MRPL51,GAPDH,TPI1,RDH10,MND1,INHBA,DDX39A,HIST1H1D,CCNB1,CMPK2,CLPS,MRPL15,GGH,LYZ,THOC1,CYBA,MCM4,PKMYT1,CCNE1,PRDX1,POLQ,UBE2S,NEIL3,MCM2,DBF4,SQLE,PLK4,SNRPG,CCNA2,GZMA,PLA2G7,GGCT,CDCA5,FADS2,PPP4C,UCHL1,BUB1B,HIST1H2BD,FCER1G,CCR5,HMGB2,MAD2L1,MELK,KIAA0101,PLK1,BIRC5,TK1,BUB1,LRP8,CDC25A,FEN1,CXCL8,MRPL13,ISG20,BOLA2B,HIST1H1E,FA…
GO:0071222	Cellular response to lipopolysaccharide	13	185	0.51	0.0156	9606.ENSP00000250092,9606.ENSP00000256722,9606.ENSP00000264246,9606.ENSP00000264832,9606.ENSP00000286758,9606.ENSP00000292303,9606.ENSP00000296503,9606.ENSP00000305651,9606.ENSP00000306512,9606.ENSP00000306884,9606.ENSP00000332049,9606.ENSP00000354901,9606.ENSP00000358997	CD68,CMPK2,CD80,ICAM1,CXCL13,CCR5,HMGB2,CXCL10,CXCL8,CXCL11,CD86,CXCL9,IRAK1
GO:0034641	Cellular nitrogen compound metabolic process	100	3282	0.14	0.0157	9606.ENSP00000166345,9606.ENSP00000209728,9606.ENSP00000216117,9606.ENSP00000219097,9606.ENSP00000221486,9606.ENSP00000228843,9606.ENSP00000229238,9606.ENSP00000229239,9606.ENSP00000229270,9606.ENSP00000240488,9606.ENSP00000242776,9606.ENSP00000256442,9606.ENSP00000256722,9606.ENSP00000260102,9606.ENSP00000260118,9606.ENSP00000261600,9606.ENSP00000262105,9606.ENSP00000262643,9606.ENSP00000264233,…	TRIP13,CDC6,HMOX1,ORC6,RNASEH2A,RAD51AP1,MRPL51,GAPDH,TPI1,MND1,DDX39A,CCNB1,CMPK2,MRPL15,GGH,THOC1,MCM4,CCNE1,POLQ,NEIL3,MCM2,SNRPG,GGCT,CDCA5,HMGB2,KIAA0101,TK1,FEN1,MRPL13,ISG20,FANCI,CLSPN,GEN1,EZH2,DCTPP1,APOBEC3B,PIF1,LIN9,IDH2,SHMT2,NME1,EIF4EBP1,ETV7,OAS2,FOXM1,E2F1,HIST1H4J,BLM,LAGE3,RRM2,WDHD1,PNP,ILF2,HORMAD1,E2F2,EXO1,HIST3H2A,CENPF,DTL,UBE2T,HMGB3,ORC1,RAD54L,PGK1,SRPK1,PSAT1,HIST1H4…
GO:0090224	Regulation of spindle organization	6	39	0.85	0.0161	9606.ENSP00000300093,9606.ENSP00000300403,9606.ENSP00000323300,9606.ENSP00000326550,9606.ENSP00000358925,9606.ENSP00000362937	PLK1,TPX2,SPAG5,TACC3,PSRC1,RCC1
GO:0010556	Regulation of macromolecule biosynthetic process	117	3976	0.13	0.0164	9606.ENSP00000166345,9606.ENSP00000209728,9606.ENSP00000216117,9606.ENSP00000216341,9606.ENSP00000216802,9606.ENSP00000217026,9606.ENSP00000225655,9606.ENSP00000226279,9606.ENSP00000229239,9606.ENSP00000242208,9606.ENSP00000244534,9606.ENSP00000244573,9606.ENSP00000247191,9606.ENSP00000261600,9606.ENSP00000262643,9606.ENSP00000263735,9606.ENSP00000264246,9606.ENSP00000264832,9606.ENSP00000265340,…	TRIP13,CDC6,HMOX1,GZMB,PSME2,MYBL2,PFN1,CD38,GAPDH,INHBA,HIST1H1D,HIST1H1A,DLGAP5,THOC1,CCNE1,EPCAM,CD80,ICAM1,PITX1,TFEC,GAL,DBF4,ARNTL2,S100A11,CCNA2,NFKBIE,CCT5,ATAD2,EN1,H2AFZ,HMGB2,PLK1,CD3D,BIRC5,LRP8,CXCL10,MRPL13,CDCA7,HIST1H1E,CBX2,CKS1B,AURKB,EZH2,CALR,SOX11,E2F7,PIF1,LIN9,HIST1H1B,CD86,HIST2H2AB,HIST2H3D,SHMT2,EIF4EBP1,HIST1H2AD,ETV7,FOXM1,IKZF3,E2F1,SUV39H2,HIST1H4J,BLM,LAGE3,HIST1H2A…
GO:0032268	Regulation of cellular protein metabolic process	85	2693	0.16	0.0166	9606.ENSP00000209728,9606.ENSP00000216341,9606.ENSP00000216802,9606.ENSP00000216911,9606.ENSP00000229239,9606.ENSP00000233893,9606.ENSP00000236671,9606.ENSP00000242208,9606.ENSP00000247191,9606.ENSP00000256442,9606.ENSP00000257934,9606.ENSP00000262300,9606.ENSP00000262643,9606.ENSP00000262746,9606.ENSP00000264246,9606.ENSP00000264552,9606.ENSP00000264832,9606.ENSP00000265148,9606.ENSP00000265728,…	CDC6,GZMB,PSME2,AURKA,GAPDH,HSPE1,CTSD,INHBA,DLGAP5,CCNB1,ESPL1,PKMYT1,CCNE1,PRDX1,CD80,UBE2S,ICAM1,CENPE,DBF4,CCNA2,UCHL1,SAMSN1,CCNB2,CSTB,MAD2L1,PLK1,TPX2,BIRC5,CLEC7A,LRP8,CDC25A,CXCL10,CST1,MRPL13,PPP1R14B,FANCI,CKS1B,CLSPN,MARCO,EZH2,CALR,CDC25C,PMAIP1,CDCA2,HIST1H1B,CD86,SHMT2,CDKN3,PLAUR,EIF4EBP1,FOXM1,IFI6,FN1,BLM,UBE2C,CCL20,IQGAP3,PPP1R14C,KIF14,LAMTOR2,S100A7,S100A8,S100A9,FCGR1A,TTK,…
GO:0072711	Cellular response to hydroxyurea	4	13	1.15	0.0168	9606.ENSP00000347232,9606.ENSP00000372088,9606.ENSP00000440402,9606.ENSP00000450607	BLM,RAD51,DDX11,TIMELESS
GO:0046718	Viral entry into host cell	9	95	0.64	0.017	9606.ENSP00000264246,9606.ENSP00000264832,9606.ENSP00000292303,9606.ENSP00000332049,9606.ENSP00000345672,9606.ENSP00000378699,9606.ENSP00000386884,9606.ENSP00000436768,9606.ENSP00000449999	CD80,ICAM1,CCR5,CD86,CTSB,CDK1,CXCR4,SLC52A2,CLEC5A
GO:0019220	Regulation of phosphate metabolic process	62	1816	0.19	0.0174	9606.ENSP00000209728,9606.ENSP00000242208,9606.ENSP00000256442,9606.ENSP00000262300,9606.ENSP00000262643,9606.ENSP00000262746,9606.ENSP00000264246,9606.ENSP00000264832,9606.ENSP00000265148,9606.ENSP00000265728,9606.ENSP00000274026,9606.ENSP00000284440,9606.ENSP00000285670,9606.ENSP00000288207,9606.ENSP00000289707,9606.ENSP00000300093,9606.ENSP00000300403,9606.ENSP00000303634,9606.ENSP00000303706,…	CDC6,INHBA,CCNB1,PKMYT1,CCNE1,PRDX1,CD80,ICAM1,CENPE,DBF4,CCNA2,UCHL1,SAMSN1,CCNB2,SLAMF8,PLK1,TPX2,LRP8,CDC25A,CXCL10,PPP1R14B,CKS1B,CLSPN,MARCO,EZH2,CDC25C,CDCA2,CD86,SHMT2,CDKN3,CASC5,PLAUR,FOXM1,FN1,BLM,CCL20,IQGAP3,PPP1R14C,KIF14,LAMTOR2,S100A7,FCGR1A,TTK,PSRC1,IRAK1,MMP9,PGK1,DKK1,CKS2,RAD51,MST4,INCENP,CDK1,CXCR4,PTPRC,CDKN2A,PBK,CCNE2,ADAM8,APOC1,APOC2,FAM83D
GO:0010468	Regulation of gene expression	137	4813	0.11	0.0175	9606.ENSP00000209728,9606.ENSP00000216117,9606.ENSP00000216341,9606.ENSP00000216802,9606.ENSP00000216911,9606.ENSP00000217026,9606.ENSP00000225655,9606.ENSP00000226279,9606.ENSP00000229239,9606.ENSP00000242208,9606.ENSP00000244534,9606.ENSP00000244573,9606.ENSP00000247191,9606.ENSP00000250160,9606.ENSP00000256442,9606.ENSP00000259396,9606.ENSP00000261600,9606.ENSP00000261623,9606.ENSP00000262629,…	CDC6,HMOX1,GZMB,PSME2,AURKA,MYBL2,PFN1,CD38,GAPDH,INHBA,HIST1H1D,HIST1H1A,DLGAP5,WISP1,CCNB1,ORM1,THOC1,CYBA,TYROBP,CCNE1,EPCAM,CD80,ICAM1,PITX1,TFEC,GAL,ARNTL2,CCNA2,NFKBIE,ATAD2,FCER1G,EN1,H2AFZ,HMGB2,PLK1,CD3D,BIRC5,CLEC7A,LRP8,CXCL10,MRPL13,CDCA7,HIST1H1E,CBX2,CKS1B,AURKB,EZH2,CALR,SOX11,E2F7,LIN9,HIST1H1B,CD86,HIST2H2AB,HIST2H3D,SHMT2,NME1,EIF4EBP1,HIST1H2AD,ETV7,FOXM1,IKZF3,E2F1,FN1,SUV39H2…
GO:0032467	Positive regulation of cytokinesis	6	40	0.84	0.0178	9606.ENSP00000209728,9606.ENSP00000260363,9606.ENSP00000313950,9606.ENSP00000356319,9606.ENSP00000376306,9606.ENSP00000404190	CDC6,KIF23,AURKB,KIF14,CIT,RACGAP1
GO:0045740	Positive regulation of dna replication	6	40	0.84	0.0178	9606.ENSP00000265728,9606.ENSP00000323246,9606.ENSP00000368458,9606.ENSP00000378699,9606.ENSP00000393139,9606.ENSP00000481103	DBF4,E2F7,PCNA,CDK1,CDC7,E2F8
GO:0002449	Lymphocyte mediated immunity	11	141	0.55	0.0187	9606.ENSP00000216341,9606.ENSP00000219150,9606.ENSP00000262746,9606.ENSP00000264832,9606.ENSP00000289902,9606.ENSP00000313967,9606.ENSP00000355506,9606.ENSP00000357022,9606.ENSP00000363773,9606.ENSP00000364080,9606.ENSP00000398803	GZMB,CORO1A,PRDX1,ICAM1,FCER1G,C1QB,EXO1,SLAMF7,C1QA,HLA-DQB1,TSTA3
GO:0044238	Primary metabolic process	195	7332	0.08	0.0205	9606.ENSP00000005286,9606.ENSP00000166345,9606.ENSP00000209728,9606.ENSP00000215743,9606.ENSP00000216341,9606.ENSP00000216802,9606.ENSP00000216911,9606.ENSP00000219097,9606.ENSP00000221486,9606.ENSP00000228843,9606.ENSP00000229238,9606.ENSP00000229239,9606.ENSP00000229270,9606.ENSP00000231009,9606.ENSP00000236671,9606.ENSP00000240285,9606.ENSP00000240488,9606.ENSP00000242208,9606.ENSP00000242776,…	TMEM132A,TRIP13,CDC6,MMP11,GZMB,PSME2,AURKA,ORC6,RNASEH2A,RAD51AP1,MRPL51,GAPDH,TPI1,GZMK,CTSD,RDH10,MND1,INHBA,DDX39A,HIST1H1D,ADAMDEC1,CCNB1,CMPK2,ESPL1,CLPS,MRPL15,GGH,LYZ,THOC1,MCM4,PKMYT1,CCNE1,POLQ,UBE2S,NEIL3,MCM2,SQLE,PLK4,SNRPG,CCNA2,GZMA,PLA2G7,CDCA5,FADS2,PPP4C,UCHL1,BUB1B,HIST1H2BD,CCR5,HMGB2,MAD2L1,MELK,KIAA0101,PLK1,BIRC5,TK1,BUB1,LRP8,CDC25A,FEN1,MRPL13,ISG20,BOLA2B,HIST1H1E,FANCI,…
GO:0000915	Actomyosin contractile ring assembly	3	5	1.44	0.0207	9606.ENSP00000260363,9606.ENSP00000265748,9606.ENSP00000404190	KIF23,ANLN,RACGAP1
GO:0016321	Female meiosis chromosome segregation	3	5	1.44	0.0207	9606.ENSP00000240423,9606.ENSP00000300093,9606.ENSP00000358813	NCAPH,PLK1,TTK
GO:0016477	Cell migration	36	896	0.26	0.0207	9606.ENSP00000219150,9606.ENSP00000236147,9606.ENSP00000261622,9606.ENSP00000263735,9606.ENSP00000264832,9606.ENSP00000265748,9606.ENSP00000286758,9606.ENSP00000289707,9606.ENSP00000289902,9606.ENSP00000292303,9606.ENSP00000296370,9606.ENSP00000296503,9606.ENSP00000301653,9606.ENSP00000305651,9606.ENSP00000306512,9606.ENSP00000306884,9606.ENSP00000322788,9606.ENSP00000330523,9606.ENSP00000346839,…	CORO1A,SELL,SLC7A5,EPCAM,ICAM1,ANLN,CXCL13,SLAMF8,FCER1G,CCR5,S100P,HMGB2,KRT16,CXCL10,CXCL8,CXCL11,MMP1,CTHRC1,FN1,CCL20,CXCL9,ASPM,LAMTOR2,S100A8,S100A9,CD2,PLAU,SDC1,CDK1,LCP1,CXCR4,PTPRC,ADAM8,SLC16A3,FAM83D,CD48
GO:0031399	Regulation of protein modification process	63	1870	0.19	0.0207	9606.ENSP00000209728,9606.ENSP00000242208,9606.ENSP00000256442,9606.ENSP00000262300,9606.ENSP00000262643,9606.ENSP00000262746,9606.ENSP00000264246,9606.ENSP00000264552,9606.ENSP00000264832,9606.ENSP00000265148,9606.ENSP00000265728,9606.ENSP00000274026,9606.ENSP00000284440,9606.ENSP00000285670,9606.ENSP00000288207,9606.ENSP00000296509,9606.ENSP00000300093,9606.ENSP00000300403,9606.ENSP00000303634,…	CDC6,INHBA,CCNB1,PKMYT1,CCNE1,PRDX1,CD80,UBE2S,ICAM1,CENPE,DBF4,CCNA2,UCHL1,SAMSN1,CCNB2,MAD2L1,PLK1,TPX2,LRP8,CDC25A,CXCL10,PPP1R14B,FANCI,CKS1B,CLSPN,MARCO,EZH2,CDC25C,CDCA2,HIST1H1B,CD86,CDKN3,PLAUR,FOXM1,FN1,BLM,UBE2C,CCL20,IQGAP3,PPP1R14C,KIF14,LAMTOR2,S100A7,FCGR1A,TTK,PSRC1,IRAK1,MMP9,CDC20,DKK1,CKS2,ISG15,RAD51,MST4,INCENP,CDK1,CXCR4,PTPRC,CDKN2A,PBK,CCNE2,ADAM8,FAM83D
GO:0031536	Positive regulation of exit from mitosis	3	5	1.44	0.0207	9606.ENSP00000275517,9606.ENSP00000301633,9606.ENSP00000348838	CDCA5,BIRC5,UBE2C
GO:0034501	Protein localization to kinetochore	4	14	1.11	0.0207	9606.ENSP00000313950,9606.ENSP00000335463,9606.ENSP00000358813,9606.ENSP00000378699	AURKB,CASC5,TTK,CDK1
GO:0050670	Regulation of lymphocyte proliferation	14	218	0.47	0.0207	9606.ENSP00000219150,9606.ENSP00000226279,9606.ENSP00000262629,9606.ENSP00000264246,9606.ENSP00000265643,9606.ENSP00000303939,9606.ENSP00000322568,9606.ENSP00000332049,9606.ENSP00000344544,9606.ENSP00000354532,9606.ENSP00000398890,9606.ENSP00000411355,9606.ENSP00000418915,9606.ENSP00000430950	CORO1A,CD38,TYROBP,CD80,GAL,CTLA4,SOX11,CD86,IKZF3,PNP,HLA-DMB,PTPRC,CDKN2A,IDO1
GO:0051130	Positive regulation of cellular component organization	45	1209	0.23	0.0207	9606.ENSP00000216341,9606.ENSP00000216911,9606.ENSP00000225655,9606.ENSP00000244573,9606.ENSP00000247191,9606.ENSP00000256442,9606.ENSP00000257934,9606.ENSP00000262629,9606.ENSP00000264832,9606.ENSP00000265748,9606.ENSP00000270861,9606.ENSP00000271324,9606.ENSP00000275517,9606.ENSP00000280326,9606.ENSP00000286758,9606.ENSP00000296484,9606.ENSP00000301633,9606.ENSP00000302569,9606.ENSP00000303634,…	GZMB,AURKA,PFN1,HIST1H1A,DLGAP5,CCNB1,ESPL1,TYROBP,ICAM1,ANLN,PLK4,CD53,CDCA5,CCT5,CXCL13,POC1A,BIRC5,CLEC7A,LRP8,FEN1,AURKB,EZH2,MMP1,SPAG5,PMAIP1,HIST1H1B,NME1,PLAUR,E2F1,FN1,UBE2C,CXCL9,NEK2,PFDN2,S100A9,PSRC1,GBP5,MMP9,CDC20,SDC1,LCP1,CXCR4,DDX11,NUSAP1,APOC2
GO:0090266	Regulation of mitotic cell cycle spindle assembly checkpoint	4	14	1.11	0.0207	9606.ENSP00000256442,9606.ENSP00000261597,9606.ENSP00000296509,9606.ENSP00000318977	CCNB1,NDC80,MAD2L1,GEN1
GO:1904668	Positive regulation of ubiquitin protein ligase activity	4	14	1.11	0.0207	9606.ENSP00000264552,9606.ENSP00000300093,9606.ENSP00000348838,9606.ENSP00000361540	UBE2S,PLK1,UBE2C,CDC20
GO:2000026	Regulation of multicellular organismal development	69	2096	0.18	0.0207	9606.ENSP00000216117,9606.ENSP00000216802,9606.ENSP00000225655,9606.ENSP00000226279,9606.ENSP00000242208,9606.ENSP00000250160,9606.ENSP00000256442,9606.ENSP00000261600,9606.ENSP00000262629,9606.ENSP00000264246,9606.ENSP00000265643,9606.ENSP00000286758,9606.ENSP00000289707,9606.ENSP00000296503,9606.ENSP00000303634,9606.ENSP00000303939,9606.ENSP00000305651,9606.ENSP00000306512,9606.ENSP00000320147,…	HMOX1,PSME2,PFN1,CD38,INHBA,WISP1,CCNB1,THOC1,TYROBP,CD80,GAL,CXCL13,SLAMF8,HMGB2,LRP8,CTLA4,CXCL10,CXCL8,EZH2,CALR,SOX11,CTHRC1,IDH2,CD86,HIST2H3D,NME1,OAS2,IKZF3,CTSL,E2F1,FN1,HIST1H4J,HIST1H3J,STAT1,IQGAP3,PNP,E2F2,CENPF,KIF14,ASPM,S100A9,HIST2H3C,CD2,HMGB3,MMP9,CDC20,PGK1,DKK1,PSMB9,HIST1H4H,HIST1H3D,HIST1H4C,CYBB,ISG15,FANCA,LILRB4,SPP1,CDK1,TYMP,HIST2H3A,SAPCD2,CXCR4,HTATIP2,HLA-B,RACGAP1,P…
GO:0010638	Positive regulation of organelle organization	28	633	0.3	0.0209	9606.ENSP00000216341,9606.ENSP00000216911,9606.ENSP00000225655,9606.ENSP00000247191,9606.ENSP00000256442,9606.ENSP00000257934,9606.ENSP00000264832,9606.ENSP00000270861,9606.ENSP00000275517,9606.ENSP00000280326,9606.ENSP00000296484,9606.ENSP00000301633,9606.ENSP00000305480,9606.ENSP00000313950,9606.ENSP00000323300,9606.ENSP00000326119,9606.ENSP00000330074,9606.ENSP00000339328,9606.ENSP00000345571,…	GZMB,AURKA,PFN1,DLGAP5,CCNB1,ESPL1,ICAM1,PLK4,CDCA5,CCT5,POC1A,BIRC5,FEN1,AURKB,SPAG5,PMAIP1,HIST1H1B,PLAUR,E2F1,UBE2C,NEK2,PFDN2,PSRC1,MMP9,SDC1,LCP1,DDX11,NUSAP1
GO:0045069	Regulation of viral genome replication	9	99	0.62	0.0211	9606.ENSP00000257570,9606.ENSP00000306512,9606.ENSP00000306565,9606.ENSP00000327459,9606.ENSP00000342278,9606.ENSP00000362931,9606.ENSP00000368699,9606.ENSP00000371471,9606.ENSP00000411532	OASL,CXCL8,ISG20,APOBEC3B,OAS2,SRPK1,ISG15,RSAD2,TOP2A
GO:0071216	Cellular response to biotic stimulus	14	219	0.46	0.0213	9606.ENSP00000250092,9606.ENSP00000256722,9606.ENSP00000264246,9606.ENSP00000264832,9606.ENSP00000286758,9606.ENSP00000292303,9606.ENSP00000296503,9606.ENSP00000302569,9606.ENSP00000305651,9606.ENSP00000306512,9606.ENSP00000306884,9606.ENSP00000332049,9606.ENSP00000354901,9606.ENSP00000358997	CD68,CMPK2,CD80,ICAM1,CXCL13,CCR5,HMGB2,CLEC7A,CXCL10,CXCL8,CXCL11,CD86,CXCL9,IRAK1
GO:0098761	Cellular response to interleukin-7	6	42	0.81	0.0213	9606.ENSP00000333277,9606.ENSP00000352252,9606.ENSP00000357189,9606.ENSP00000358154,9606.ENSP00000366999,9606.ENSP00000385479	HIST2H3D,HIST1H3J,HDGF,HIST2H3C,HIST1H3D,HIST2H3A
GO:0046605	Regulation of centrosome cycle	7	60	0.73	0.0224	9606.ENSP00000216911,9606.ENSP00000260731,9606.ENSP00000270861,9606.ENSP00000296484,9606.ENSP00000318977,9606.ENSP00000355966,9606.ENSP00000360944	AURKA,KIF11,PLK4,POC1A,GEN1,NEK2,STIL
GO:0033260	Nuclear dna replication	6	43	0.8	0.0235	9606.ENSP00000262105,9606.ENSP00000265056,9606.ENSP00000305480,9606.ENSP00000368458,9606.ENSP00000372088,9606.ENSP00000405726	MCM4,MCM2,FEN1,PCNA,RAD51,CDC45
GO:0044380	Protein localization to cytoskeleton	6	43	0.8	0.0235	9606.ENSP00000216911,9606.ENSP00000265748,9606.ENSP00000323300,9606.ENSP00000358813,9606.ENSP00000360944,9606.ENSP00000481110	AURKA,ANLN,SPAG5,TTK,STIL,FAM83D
GO:0050672	Negative regulation of lymphocyte proliferation	8	80	0.66	0.0235	9606.ENSP00000262629,9606.ENSP00000264246,9606.ENSP00000265643,9606.ENSP00000303939,9606.ENSP00000322568,9606.ENSP00000332049,9606.ENSP00000418915,9606.ENSP00000430950	TYROBP,CD80,GAL,CTLA4,SOX11,CD86,CDKN2A,IDO1
GO:0070098	Chemokine-mediated signaling pathway	8	80	0.66	0.0235	9606.ENSP00000286758,9606.ENSP00000292303,9606.ENSP00000305651,9606.ENSP00000306512,9606.ENSP00000306884,9606.ENSP00000351671,9606.ENSP00000354901,9606.ENSP00000386884	CXCL13,CCR5,CXCL10,CXCL8,CXCL11,CCL20,CXCL9,CXCR4
GO:0045071	Negative regulation of viral genome replication	7	61	0.72	0.0242	9606.ENSP00000257570,9606.ENSP00000306565,9606.ENSP00000327459,9606.ENSP00000342278,9606.ENSP00000362931,9606.ENSP00000368699,9606.ENSP00000371471	OASL,ISG20,APOBEC3B,OAS2,SRPK1,ISG15,RSAD2
GO:0042742	Defense response to bacterium	16	277	0.42	0.0244	9606.ENSP00000261267,9606.ENSP00000276708,9606.ENSP00000286758,9606.ENSP00000289707,9606.ENSP00000289902,9606.ENSP00000296503,9606.ENSP00000321744,9606.ENSP00000349430,9606.ENSP00000351671,9606.ENSP00000357712,9606.ENSP00000357722,9606.ENSP00000357727,9606.ENSP00000358151,9606.ENSP00000368699,9606.ENSP00000468767,9606.ENSP00000476136	LYZ,GSDMC,CXCL13,SLAMF8,FCER1G,HMGB2,HIST1H2BC,HIST1H2BK,CCL20,S100A7,S100A8,S100A9,HIST2H2BE,ISG15,ACP5,HIST1H2BJ
GO:0045860	Positive regulation of protein kinase activity	25	550	0.32	0.0273	9606.ENSP00000209728,9606.ENSP00000256442,9606.ENSP00000265148,9606.ENSP00000265728,9606.ENSP00000300403,9606.ENSP00000303634,9606.ENSP00000311083,9606.ENSP00000312995,9606.ENSP00000320147,9606.ENSP00000332049,9606.ENSP00000354451,9606.ENSP00000356319,9606.ENSP00000357288,9606.ENSP00000358165,9606.ENSP00000358925,9606.ENSP00000358997,9606.ENSP00000363081,9606.ENSP00000364976,9606.ENSP00000377867,…	CDC6,CCNB1,CENPE,DBF4,TPX2,LRP8,CKS1B,CLSPN,EZH2,CD86,IQGAP3,KIF14,LAMTOR2,FCGR1A,PSRC1,IRAK1,DKK1,CKS2,MST4,INCENP,CDK1,CXCR4,PTPRC,PBK,ADAM8
GO:0012501	Programmed cell death	40	1054	0.24	0.0278	9606.ENSP00000216117,9606.ENSP00000216341,9606.ENSP00000226279,9606.ENSP00000229239,9606.ENSP00000242208,9606.ENSP00000257934,9606.ENSP00000261600,9606.ENSP00000262629,9606.ENSP00000265056,9606.ENSP00000266263,9606.ENSP00000267953,9606.ENSP00000274306,9606.ENSP00000275428,9606.ENSP00000276708,9606.ENSP00000287598,9606.ENSP00000296503,9606.ENSP00000298048,9606.ENSP00000300403,9606.ENSP00000301633,…	HMOX1,GZMB,CD38,GAPDH,INHBA,ESPL1,THOC1,TYROBP,MCM2,MTFP1,BCL2A1,GZMA,GGCT,GSDMC,BUB1B,HMGB2,MELK,TPX2,BIRC5,KRT16,BUB1,CDCA7,PMAIP1,IFI6,CTSL,E2F1,E2F2,S100A8,S100A9,CD2,PIM2,CKAP2,CIT,MST4,CDK1,CXCR4,HTATIP2,TOP2A,CDKN2A,PRAME
GO:0051246	Regulation of protein metabolic process	87	2828	0.15	0.028	9606.ENSP00000209728,9606.ENSP00000216341,9606.ENSP00000216802,9606.ENSP00000216911,9606.ENSP00000229239,9606.ENSP00000233893,9606.ENSP00000236671,9606.ENSP00000242208,9606.ENSP00000247191,9606.ENSP00000256442,9606.ENSP00000257934,9606.ENSP00000262300,9606.ENSP00000262643,9606.ENSP00000262746,9606.ENSP00000264246,9606.ENSP00000264552,9606.ENSP00000264832,9606.ENSP00000265148,9606.ENSP00000265728,…	CDC6,GZMB,PSME2,AURKA,GAPDH,HSPE1,CTSD,INHBA,DLGAP5,CCNB1,ESPL1,PKMYT1,CCNE1,PRDX1,CD80,UBE2S,ICAM1,CENPE,DBF4,CCNA2,UCHL1,SAMSN1,CCNB2,CSTB,MAD2L1,PLK1,TPX2,BIRC5,CLEC7A,LRP8,CDC25A,CXCL10,CST1,MRPL13,PPP1R14B,FANCI,CKS1B,CLSPN,MARCO,EZH2,CALR,CDC25C,PMAIP1,CDCA2,HIST1H1B,CD86,SHMT2,CDKN3,PLAUR,EIF4EBP1,FOXM1,IFI6,FN1,BLM,UBE2C,CCL20,IQGAP3,PPP1R14C,DTL,KIF14,LAMTOR2,S100A7,S100A8,S100A9,FCGR1A,…
GO:0002501	Peptide antigen assembly with mhc protein complex	3	6	1.36	0.0284	9606.ENSP00000320866,9606.ENSP00000378786,9606.ENSP00000398890	CALR,HLA-DRA,HLA-DMB
GO:0018119	Peptidyl-cysteine s-nitrosylation	3	6	1.36	0.0284	9606.ENSP00000229239,9606.ENSP00000357722,9606.ENSP00000357727	GAPDH,S100A8,S100A9
GO:0098532	Histone h3-k27 trimethylation	3	6	1.36	0.0284	9606.ENSP00000244534,9606.ENSP00000307705,9606.ENSP00000320147	HIST1H1D,HIST1H1E,EZH2
GO:1990668	Vesicle fusion with endoplasmic reticulum-golgi intermediate compartment (ergic) membrane	3	6	1.36	0.0284	9606.ENSP00000320866,9606.ENSP00000346206,9606.ENSP00000364034	CALR,TAP1,TAP2
GO:0016584	Nucleosome positioning	4	16	1.06	0.0288	9606.ENSP00000244534,9606.ENSP00000244573,9606.ENSP00000307705,9606.ENSP00000330074	HIST1H1D,HIST1H1A,HIST1H1E,HIST1H1B
GO:0048525	Negative regulation of viral process	9	105	0.59	0.0293	9606.ENSP00000257570,9606.ENSP00000306565,9606.ENSP00000327459,9606.ENSP00000342278,9606.ENSP00000354394,9606.ENSP00000362931,9606.ENSP00000368699,9606.ENSP00000371471,9606.ENSP00000432218	OASL,ISG20,APOBEC3B,OAS2,STAT1,SRPK1,ISG15,RSAD2,IL32
GO:0051252	Regulation of rna metabolic process	109	3722	0.13	0.0293	9606.ENSP00000166345,9606.ENSP00000209728,9606.ENSP00000216117,9606.ENSP00000216802,9606.ENSP00000217026,9606.ENSP00000225655,9606.ENSP00000226279,9606.ENSP00000242208,9606.ENSP00000244534,9606.ENSP00000244573,9606.ENSP00000247191,9606.ENSP00000256442,9606.ENSP00000257570,9606.ENSP00000261600,9606.ENSP00000262643,9606.ENSP00000263735,9606.ENSP00000264246,9606.ENSP00000264832,9606.ENSP00000265340,…	TRIP13,CDC6,HMOX1,PSME2,MYBL2,PFN1,CD38,INHBA,HIST1H1D,HIST1H1A,DLGAP5,CCNB1,OASL,THOC1,CCNE1,EPCAM,CD80,ICAM1,PITX1,TFEC,GAL,ARNTL2,CCNA2,NFKBIE,ATAD2,EN1,H2AFZ,HMGB2,PLK1,CD3D,BIRC5,LRP8,CXCL10,CDCA7,HIST1H1E,CBX2,CKS1B,AURKB,EZH2,CALR,SOX11,E2F7,LIN9,HIST1H1B,CD86,HIST2H2AB,HIST2H3D,HIST1H2AD,ETV7,OAS2,FOXM1,IKZF3,E2F1,SUV39H2,HIST1H4J,BLM,LAGE3,HIST1H2AI,HIST1H2AG,HIST1H3J,RRM2,STAT1,ILF2,E2F…
GO:0001819	Positive regulation of cytokine production	22	461	0.34	0.0299	9606.ENSP00000216117,9606.ENSP00000229239,9606.ENSP00000259396,9606.ENSP00000261623,9606.ENSP00000262629,9606.ENSP00000264246,9606.ENSP00000289902,9606.ENSP00000296503,9606.ENSP00000302569,9606.ENSP00000332049,9606.ENSP00000354394,9606.ENSP00000358490,9606.ENSP00000358997,9606.ENSP00000359488,9606.ENSP00000367851,9606.ENSP00000371471,9606.ENSP00000410481,9606.ENSP00000411355,9606.ENSP00000419085,…	HMOX1,GAPDH,ORM1,CYBA,TYROBP,CD80,FCER1G,HMGB2,CLEC7A,CD86,STAT1,CD2,IRAK1,GBP5,CYBB,RSAD2,LTB,PTPRC,TIGIT,IDO1,CLEC5A,ADAM8
GO:0006890	Retrograde vesicle-mediated transport, golgi to endoplasmic reticulum	8	84	0.64	0.03	9606.ENSP00000260363,9606.ENSP00000260731,9606.ENSP00000263181,9606.ENSP00000265148,9606.ENSP00000324020,9606.ENSP00000361298,9606.ENSP00000363524,9606.ENSP00000404190	KIF23,KIF11,KIF18A,CENPE,KIF15,KIF2C,KIF4A,RACGAP1
GO:0001666	Response to hypoxia	18	342	0.38	0.0308	9606.ENSP00000216117,9606.ENSP00000216802,9606.ENSP00000226279,9606.ENSP00000256442,9606.ENSP00000261623,9606.ENSP00000264832,9606.ENSP00000274026,9606.ENSP00000326119,9606.ENSP00000340691,9606.ENSP00000345571,9606.ENSP00000346997,9606.ENSP00000358997,9606.ENSP00000361850,9606.ENSP00000362413,9606.ENSP00000363993,9606.ENSP00000367851,9606.ENSP00000386884,9606.ENSP00000453302	HMOX1,PSME2,CD38,CCNB1,CYBA,ICAM1,CCNA2,PMAIP1,EIF4EBP1,E2F1,SUV39H2,IRAK1,PLAU,PGK1,PSMB9,CYBB,CXCR4,ADAM8
GO:0032508	DNA duplex unwinding	9	106	0.59	0.0309	9606.ENSP00000262105,9606.ENSP00000264233,9606.ENSP00000265056,9606.ENSP00000328174,9606.ENSP00000347232,9606.ENSP00000372088,9606.ENSP00000399888,9606.ENSP00000440402,9606.ENSP00000482313	MCM4,POLQ,MCM2,PIF1,BLM,RAD51,HMGA1,DDX11,RECQL4
GO:0043903	Regulation of symbiotic process	14	230	0.44	0.031	9606.ENSP00000229239,9606.ENSP00000257570,9606.ENSP00000306512,9606.ENSP00000306565,9606.ENSP00000327459,9606.ENSP00000342278,9606.ENSP00000354394,9606.ENSP00000362931,9606.ENSP00000368699,9606.ENSP00000371471,9606.ENSP00000386884,9606.ENSP00000411532,9606.ENSP00000432218,9606.ENSP00000438483	GAPDH,OASL,CXCL8,ISG20,APOBEC3B,OAS2,STAT1,SRPK1,ISG15,RSAD2,CXCR4,TOP2A,IL32,KPNA2
GO:0038111	interleukin-7-mediated signaling pathway	5	30	0.88	0.0311	9606.ENSP00000333277,9606.ENSP00000352252,9606.ENSP00000358154,9606.ENSP00000366999,9606.ENSP00000385479	HIST2H3D,HIST1H3J,HIST2H3C,HIST1H3D,HIST2H3A
GO:0044818	Mitotic g2/m transition checkpoint	5	30	0.88	0.0311	9606.ENSP00000209728,9606.ENSP00000312995,9606.ENSP00000347232,9606.ENSP00000360623,9606.ENSP00000378699	CDC6,CLSPN,BLM,ORC1,CDK1
GO:0045737	Positive regulation of cyclin-dependent protein serine/threonine kinase activity	5	30	0.88	0.0311	9606.ENSP00000209728,9606.ENSP00000256442,9606.ENSP00000311083,9606.ENSP00000358925,9606.ENSP00000364976	CDC6,CCNB1,CKS1B,PSRC1,CKS2
GO:0051304	Chromosome separation	5	30	0.88	0.0311	9606.ENSP00000240423,9606.ENSP00000257934,9606.ENSP00000325017,9606.ENSP00000358813,9606.ENSP00000411532	NCAPH,ESPL1,NCAPD2,TTK,TOP2A
GO:1903900	Regulation of viral life cycle	11	153	0.52	0.0311	9606.ENSP00000257570,9606.ENSP00000306512,9606.ENSP00000306565,9606.ENSP00000327459,9606.ENSP00000342278,9606.ENSP00000362931,9606.ENSP00000368699,9606.ENSP00000371471,9606.ENSP00000411532,9606.ENSP00000432218,9606.ENSP00000438483	OASL,CXCL8,ISG20,APOBEC3B,OAS2,SRPK1,ISG15,RSAD2,TOP2A,IL32,KPNA2
GO:0048584	Positive regulation of response to stimulus	72	2257	0.16	0.0324	9606.ENSP00000216117,9606.ENSP00000216341,9606.ENSP00000216802,9606.ENSP00000226279,9606.ENSP00000242208,9606.ENSP00000250160,9606.ENSP00000261623,9606.ENSP00000264246,9606.ENSP00000264832,9606.ENSP00000274793,9606.ENSP00000286758,9606.ENSP00000289902,9606.ENSP00000296503,9606.ENSP00000300692,9606.ENSP00000302569,9606.ENSP00000303939,9606.ENSP00000305651,9606.ENSP00000306512,9606.ENSP00000313967,…	HMOX1,GZMB,PSME2,CD38,INHBA,WISP1,CYBA,CD80,ICAM1,PLA2G7,CXCL13,FCER1G,HMGB2,CD3D,CLEC7A,CTLA4,CXCL10,CXCL8,C1QB,MARCO,ICOS,EZH2,CALR,SOX11,PMAIP1,CD86,PLAUR,FPR3,FOXM1,E2F1,CCL20,IQGAP3,ASPM,FCGR3A,LAMTOR2,S100A7,S100A8,S100A9,FCGR1A,TTK,IRAK1,HMGB3,GBP5,MMP9,RTKN2,DKK1,C1QA,PSMB9,HLA-DQA2,HLA-DQB1,PIM2,UBD,PCNA,ESM1,RSAD2,CDK1,HLA-DRA,PPAPDC1A,CXCR4,HLA-DMB,HLA-B,HMGA1,PTPRC,CDKN2A,FYB,PBK,IDO1…
GO:0007019	Microtubule depolymerization	4	17	1.03	0.0338	9606.ENSP00000263181,9606.ENSP00000361298,9606.ENSP00000410452,9606.ENSP00000465992	KIF18A,KIF2C,STMN1,KIF18B
GO:0007096	Regulation of exit from mitosis	4	17	1.03	0.0338	9606.ENSP00000265748,9606.ENSP00000275517,9606.ENSP00000301633,9606.ENSP00000348838	ANLN,CDCA5,BIRC5,UBE2C
GO:0051272	Positive regulation of cellular component movement	25	561	0.31	0.0338	9606.ENSP00000216117,9606.ENSP00000219150,9606.ENSP00000225655,9606.ENSP00000250160,9606.ENSP00000263735,9606.ENSP00000264832,9606.ENSP00000271638,9606.ENSP00000274793,9606.ENSP00000286758,9606.ENSP00000302569,9606.ENSP00000305651,9606.ENSP00000306512,9606.ENSP00000320866,9606.ENSP00000346839,9606.ENSP00000351671,9606.ENSP00000357712,9606.ENSP00000361405,9606.ENSP00000361850,9606.ENSP00000386884,…	HMOX1,CORO1A,PFN1,WISP1,EPCAM,ICAM1,S100A11,PLA2G7,CXCL13,CLEC7A,CXCL10,CXCL8,CALR,FN1,CCL20,S100A7,MMP9,PLAU,CXCR4,TSTA3,STMN1,PTPRC,LRRC15,ADAM8,ENSG00000158164
GO:1903555	Regulation of tumor necrosis factor superfamily cytokine production	11	155	0.51	0.0338	9606.ENSP00000259396,9606.ENSP00000261623,9606.ENSP00000262629,9606.ENSP00000289902,9606.ENSP00000302569,9606.ENSP00000332049,9606.ENSP00000358490,9606.ENSP00000367851,9606.ENSP00000411355,9606.ENSP00000453302,9606.ENSP00000468767	ORM1,CYBA,TYROBP,FCER1G,CLEC7A,CD86,CD2,CYBB,PTPRC,ADAM8,ACP5
GO:1903901	Negative regulation of viral life cycle	8	86	0.63	0.0338	9606.ENSP00000257570,9606.ENSP00000306565,9606.ENSP00000327459,9606.ENSP00000342278,9606.ENSP00000362931,9606.ENSP00000368699,9606.ENSP00000371471,9606.ENSP00000432218	OASL,ISG20,APOBEC3B,OAS2,SRPK1,ISG15,RSAD2,IL32
GO:0022617	Extracellular matrix disassembly	7	66	0.68	0.0343	9606.ENSP00000215743,9606.ENSP00000322788,9606.ENSP00000345344,9606.ENSP00000357981,9606.ENSP00000361405,9606.ENSP00000381581,9606.ENSP00000453302	MMP11,MMP1,CTSL,CTSS,MMP9,LCP1,ADAM8
GO:2000406	Positive regulation of t cell migration	5	31	0.87	0.0345	9606.ENSP00000286758,9606.ENSP00000305651,9606.ENSP00000351671,9606.ENSP00000357712,9606.ENSP00000453302	CXCL13,CXCL10,CCL20,S100A7,ADAM8
GO:0032466	Negative regulation of cytokinesis	3	7	1.29	0.0374	9606.ENSP00000313950,9606.ENSP00000323246,9606.ENSP00000481103	AURKB,E2F7,E2F8
GO:0033313	Meiotic cell cycle checkpoint	3	7	1.29	0.0374	9606.ENSP00000166345,9606.ENSP00000355167,9606.ENSP00000358813	TRIP13,HORMAD1,TTK
GO:0070601	Centromeric sister chromatid cohesion	3	7	1.29	0.0374	9606.ENSP00000263753,9606.ENSP00000287598,9606.ENSP00000302530	SGOL1,BUB1B,BUB1
GO:0090267	Positive regulation of mitotic cell cycle spindle assembly checkpoint	3	7	1.29	0.0374	9606.ENSP00000261597,9606.ENSP00000296509,9606.ENSP00000318977	NDC80,MAD2L1,GEN1
GO:0032760	Positive regulation of tumor necrosis factor production	8	88	0.62	0.0377	9606.ENSP00000259396,9606.ENSP00000261623,9606.ENSP00000262629,9606.ENSP00000289902,9606.ENSP00000302569,9606.ENSP00000358490,9606.ENSP00000367851,9606.ENSP00000411355	ORM1,CYBA,TYROBP,FCER1G,CLEC7A,CD2,CYBB,PTPRC
GO:0000132	Establishment of mitotic spindle orientation	5	32	0.85	0.0385	9606.ENSP00000261597,9606.ENSP00000296509,9606.ENSP00000300093,9606.ENSP00000336868,9606.ENSP00000386348	NDC80,MAD2L1,PLK1,CENPA,SAPCD2
GO:0031572	G2 DNA damage checkpoint	5	32	0.85	0.0385	9606.ENSP00000300093,9606.ENSP00000312995,9606.ENSP00000347232,9606.ENSP00000355958,9606.ENSP00000378699	PLK1,CLSPN,BLM,DTL,CDK1
GO:0040020	Regulation of meiotic nuclear division	5	32	0.85	0.0385	9606.ENSP00000166345,9606.ENSP00000320866,9606.ENSP00000355167,9606.ENSP00000358813,9606.ENSP00000361540	TRIP13,CALR,HORMAD1,TTK,CDC20
GO:0051607	Defense response to virus	13	210	0.45	0.0385	9606.ENSP00000257570,9606.ENSP00000305651,9606.ENSP00000306565,9606.ENSP00000326119,9606.ENSP00000327459,9606.ENSP00000342278,9606.ENSP00000342513,9606.ENSP00000354394,9606.ENSP00000354901,9606.ENSP00000359787,9606.ENSP00000368699,9606.ENSP00000371471,9606.ENSP00000411355	OASL,CXCL10,ISG20,PMAIP1,APOBEC3B,OAS2,IFI6,STAT1,CXCL9,IFI44L,ISG15,RSAD2,PTPRC
GO:1901976	Regulation of cell cycle checkpoint	5	32	0.85	0.0385	9606.ENSP00000256442,9606.ENSP00000261597,9606.ENSP00000261600,9606.ENSP00000296509,9606.ENSP00000318977	CCNB1,NDC80,THOC1,MAD2L1,GEN1
GO:0002523	Leukocyte migration involved in inflammatory response	4	18	1.01	0.0389	9606.ENSP00000289707,9606.ENSP00000357722,9606.ENSP00000357727,9606.ENSP00000453302	SLAMF8,S100A8,S100A9,ADAM8
GO:0032940	Secretion by cell	37	979	0.24	0.0424	9606.ENSP00000219150,9606.ENSP00000236147,9606.ENSP00000236671,9606.ENSP00000242208,9606.ENSP00000250092,9606.ENSP00000259396,9606.ENSP00000260118,9606.ENSP00000261267,9606.ENSP00000261623,9606.ENSP00000262428,9606.ENSP00000262629,9606.ENSP00000265643,9606.ENSP00000271324,9606.ENSP00000271638,9606.ENSP00000286091,9606.ENSP00000289902,9606.ENSP00000291568,9606.ENSP00000296370,9606.ENSP00000339328,…	CORO1A,SELL,CTSD,INHBA,CD68,ORM1,GGH,LYZ,CYBA,COTL1,TYROBP,GAL,CD53,S100A11,PDIA4,FCER1G,CSTB,S100P,PLAUR,CTSB,FN1,PNP,ILF2,LAMTOR2,S100A7,S100A8,S100A9,CTSS,MMP9,PLAU,CYBB,PRDX4,CALML5,HLA-B,PTPRC,CLEC5A,ADAM8
GO:0048609	Multicellular organismal reproductive process	32	807	0.26	0.0432	9606.ENSP00000166345,9606.ENSP00000216911,9606.ENSP00000240423,9606.ENSP00000242208,9606.ENSP00000244573,9606.ENSP00000256442,9606.ENSP00000263181,9606.ENSP00000263382,9606.ENSP00000295746,9606.ENSP00000296484,9606.ENSP00000296503,9606.ENSP00000300093,9606.ENSP00000320866,9606.ENSP00000335463,9606.ENSP00000345571,9606.ENSP00000345672,9606.ENSP00000355167,9606.ENSP00000356379,9606.ENSP00000358813,…	TRIP13,AURKA,NCAPH,INHBA,HIST1H1A,CCNB1,KIF18A,ASF1B,KIAA1524,POC1A,HMGB2,PLK1,CALR,CASC5,E2F1,CTSB,HORMAD1,ASPM,TTK,SRPK1,PCNA,PRDX4,GJB2,FANCA,PTTG1,SPP1,KIFC1,RACGAP1,TOP2A,MYBL1,H2AFX,PAFAH1B3
GO:0050792	Regulation of viral process	13	215	0.44	0.0463	9606.ENSP00000257570,9606.ENSP00000306512,9606.ENSP00000306565,9606.ENSP00000327459,9606.ENSP00000342278,9606.ENSP00000354394,9606.ENSP00000362931,9606.ENSP00000368699,9606.ENSP00000371471,9606.ENSP00000386884,9606.ENSP00000411532,9606.ENSP00000432218,9606.ENSP00000438483	OASL,CXCL8,ISG20,APOBEC3B,OAS2,STAT1,SRPK1,ISG15,RSAD2,CXCR4,TOP2A,IL32,KPNA2
GO:0009059	Macromolecule biosynthetic process	55	1643	0.18	0.0472	9606.ENSP00000166345,9606.ENSP00000209728,9606.ENSP00000219097,9606.ENSP00000221486,9606.ENSP00000229238,9606.ENSP00000242208,9606.ENSP00000256442,9606.ENSP00000260102,9606.ENSP00000261600,9606.ENSP00000262105,9606.ENSP00000262643,9606.ENSP00000264233,9606.ENSP00000265056,9606.ENSP00000265728,9606.ENSP00000272348,9606.ENSP00000300035,9606.ENSP00000301634,9606.ENSP00000305480,9606.ENSP00000306548,…	TRIP13,CDC6,ORC6,RNASEH2A,MRPL51,INHBA,CCNB1,MRPL15,THOC1,MCM4,CCNE1,POLQ,MCM2,DBF4,SNRPG,KIAA0101,TK1,FEN1,MRPL13,CLSPN,GEN1,PIF1,LIN9,EIF4EBP1,ETV7,E2F1,HIST1H4J,BLM,RRM2,WDHD1,ILF2,E2F2,EXO1,CENPF,DTL,ORC1,HIST1H4H,HIST1H4C,PCNA,ISG15,SDC1,RAD51,PTTG1,CDK1,MRPS12,TONSL,CDC7,HMGA1,CDC45,PTPRC,MCM10,CCNE2,DDX11,TIMELESS,RECQL4
GO:0000733	DNA strand renaturation	3	8	1.23	0.0483	9606.ENSP00000347232,9606.ENSP00000361043,9606.ENSP00000482313	BLM,RAD54L,RECQL4
GO:0032075	Positive regulation of nuclease activity	3	8	1.23	0.0483	9606.ENSP00000296503,9606.ENSP00000368458,9606.ENSP00000440402	HMGB2,PCNA,DDX11
GO:0051299	Centrosome separation	3	8	1.23	0.0483	9606.ENSP00000216911,9606.ENSP00000260731,9606.ENSP00000355966	AURKA,KIF11,NEK2
GO:0098883	Synapse pruning	3	8	1.23	0.0483	9606.ENSP00000313967,9606.ENSP00000363081,9606.ENSP00000363773	C1QB,DKK1,C1QA
GO:1901993	Regulation of meiotic cell cycle phase transition	3	8	1.23	0.0483	9606.ENSP00000303706,9606.ENSP00000321656,9606.ENSP00000358813	CDC25A,CDC25C,TTK
GO:2000147	Positive regulation of cell motility	24	547	0.3	0.0483	9606.ENSP00000216117,9606.ENSP00000219150,9606.ENSP00000225655,9606.ENSP00000250160,9606.ENSP00000263735,9606.ENSP00000264832,9606.ENSP00000271638,9606.ENSP00000274793,9606.ENSP00000286758,9606.ENSP00000302569,9606.ENSP00000305651,9606.ENSP00000306512,9606.ENSP00000320866,9606.ENSP00000346839,9606.ENSP00000351671,9606.ENSP00000357712,9606.ENSP00000361405,9606.ENSP00000361850,9606.ENSP00000386884,…	HMOX1,CORO1A,PFN1,WISP1,EPCAM,ICAM1,S100A11,PLA2G7,CXCL13,CLEC7A,CXCL10,CXCL8,CALR,FN1,CCL20,S100A7,MMP9,PLAU,CXCR4,TSTA3,PTPRC,LRRC15,ADAM8,ENSG00000158164
GO:0007165	Signal transduction	135	4876	0.1	0.0492	9606.ENSP00000216117,9606.ENSP00000216341,9606.ENSP00000216802,9606.ENSP00000216911,9606.ENSP00000219150,9606.ENSP00000225655,9606.ENSP00000226279,9606.ENSP00000242208,9606.ENSP00000247191,9606.ENSP00000250160,9606.ENSP00000256442,9606.ENSP00000257570,9606.ENSP00000261366,9606.ENSP00000261600,9606.ENSP00000261623,9606.ENSP00000262629,9606.ENSP00000262643,9606.ENSP00000263735,9606.ENSP00000264246,…	HMOX1,GZMB,PSME2,AURKA,CORO1A,PFN1,CD38,INHBA,DLGAP5,WISP1,CCNB1,OASL,LMNB1,THOC1,CYBA,TYROBP,CCNE1,EPCAM,CD80,ICAM1,GAL,BCL2A1,CD53,S100A11,CCNA2,GGCT,PPP4C,CXCL13,FCER1G,CCR5,HMGB2,MELK,PLK1,CD3D,BIRC5,CLEC7A,LRP8,CTLA4,CXCL10,SHCBP1,CXCL8,ISG20,BOLA2B,CXCL11,MARCO,CALR,CDC25C,SOX11,MMP1,E2F7,PMAIP1,CTHRC1,BOLA2,CD86,HIST2H3D,PLAUR,EIF4EBP1,FPR3,OAS2,FOXM1,IFI6,CTSL,E2F1,CTSB,FN1,CCL20,HIST1H3J…
