# Supplementary material for: LncRNA-Based Classification of Triple Negative Breast Cancer Revealed Inherent Tumor Heterogeneity and Vulnerabilities
Source: Noncoding RNA. 2022 Jun 21;8(4):44. doi: 10.3390/ncrna8040044 (PMC9326727; doi:10.3390/ncrna8040044)
Supplement: Supplementary file 1 [file ncrna-08-00044-s001.zip › Supplementary table S5.xlsx]

## Sheet: enrichment.Process (2)
Supplemetary table S5. Enriched gene ontology (GO) terms in LINC00511-Enr TNBC cluster based on STRING analysis
#term ID	term description	observed gene count	background gene count	strength	false discovery rate	matching proteins in your network (IDs)	matching proteins in your network (labels)
GO:0000278	Mitotic cell cycle	112	695	0.77	1.4e-44	9606.ENSP00000166345,9606.ENSP00000209728,9606.ENSP00000216122,9606.ENSP00000216911,9606.ENSP00000217026,9606.ENSP00000240423,9606.ENSP00000242208,9606.ENSP00000244745,9606.ENSP00000247191,9606.ENSP00000251496,9606.ENSP00000256442,9606.ENSP00000257934,9606.ENSP00000260363,9606.ENSP00000260731,9606.ENSP00000261597,9606.ENSP00000262105,9606.ENSP00000262300,9606.ENSP00000262643,9606.ENSP00000262904,…	TRIP13,CDC6,MCM5,AURKA,MYBL2,NCAPH,INHBA,SOX4,DLGAP5,NCAPG,CCNB1,ESPL1,KIF23,KIF11,NDC80,MCM4,PKMYT1,CCNE1,E2F3,KIF18A,SGOL1,MCM6,UBE2S,MCM2,CENPE,DBF4,ANLN,PLK4,NUF2,CCNA2,CDCA5,BUB1B,CCNB2,POC1A,MAD2L1,MELK,PLK1,TPX2,CDT1,TUBA1C,BIRC5,BUB1,CDC25A,CKS1B,CLSPN,AURKB,TYMS,SKA3,CDC25C,DSCC1,E2F7,SPAG5,KIF15,NCAPD2,TACC3,CDKN3,TUBA1B,CENPA,TUBB,EIF4EBP1,FOXM1,E2F1,BLM,UBE2C,SMC4,RRM2,WDHD1,IQGAP3,CE…
GO:1903047	Mitotic cell cycle process	103	616	0.78	4.22e-42	9606.ENSP00000166345,9606.ENSP00000209728,9606.ENSP00000216122,9606.ENSP00000216911,9606.ENSP00000217026,9606.ENSP00000240423,9606.ENSP00000242208,9606.ENSP00000244745,9606.ENSP00000247191,9606.ENSP00000251496,9606.ENSP00000256442,9606.ENSP00000257934,9606.ENSP00000260363,9606.ENSP00000260731,9606.ENSP00000261597,9606.ENSP00000262105,9606.ENSP00000262300,9606.ENSP00000262643,9606.ENSP00000262904,…	TRIP13,CDC6,MCM5,AURKA,MYBL2,NCAPH,INHBA,SOX4,DLGAP5,NCAPG,CCNB1,ESPL1,KIF23,KIF11,NDC80,MCM4,PKMYT1,CCNE1,E2F3,KIF18A,SGOL1,MCM6,UBE2S,MCM2,CENPE,DBF4,ANLN,PLK4,NUF2,CCNA2,CDCA5,BUB1B,CCNB2,POC1A,MAD2L1,MELK,PLK1,TPX2,CDT1,BIRC5,BUB1,CDC25A,CKS1B,CLSPN,AURKB,TYMS,CDC25C,DSCC1,E2F7,SPAG5,NCAPD2,TACC3,CDKN3,CENPA,TUBB,EIF4EBP1,FOXM1,E2F1,BLM,UBE2C,SMC4,RRM2,IQGAP3,CENPF,NEK2,KIF14,TTK,PSRC1,CEP55,…
GO:0007049	Cell cycle	145	1313	0.6	5.76e-42	9606.ENSP00000166345,9606.ENSP00000209728,9606.ENSP00000216122,9606.ENSP00000216911,9606.ENSP00000217026,9606.ENSP00000240423,9606.ENSP00000240488,9606.ENSP00000242208,9606.ENSP00000244745,9606.ENSP00000247191,9606.ENSP00000251496,9606.ENSP00000256442,9606.ENSP00000257934,9606.ENSP00000259008,9606.ENSP00000260363,9606.ENSP00000260731,9606.ENSP00000261597,9606.ENSP00000261692,9606.ENSP00000262105,…	TRIP13,CDC6,MCM5,AURKA,MYBL2,NCAPH,MND1,INHBA,SOX4,DLGAP5,NCAPG,CCNB1,ESPL1,BRIP1,KIF23,KIF11,NDC80,CDK2AP1,MCM4,PKMYT1,CCNE1,E2F3,KIF18A,SGOL1,MCM6,UBE2S,MCM2,CENPE,DBF4,ANLN,PLK4,NUF2,CCNA2,CDCA5,BUB1B,CCNB2,POC1A,MAD2L1,RAD21,MELK,KIAA0101,PLK1,TPX2,CDT1,TUBA1C,CHAF1A,BIRC5,BUB1,CDC25A,FEN1,CXCL8,FANCI,CKS1B,CLSPN,AURKB,TYMS,SKA3,EZH2,CDC25C,DSCC1,E2F7,SPAG5,KIF15,NCAPD2,TACC3,CDCA2,LIN9,CDKN3…
GO:0022402	Cell cycle process	124	976	0.66	1.05e-40	9606.ENSP00000166345,9606.ENSP00000209728,9606.ENSP00000216122,9606.ENSP00000216911,9606.ENSP00000217026,9606.ENSP00000240423,9606.ENSP00000240488,9606.ENSP00000242208,9606.ENSP00000244745,9606.ENSP00000247191,9606.ENSP00000251496,9606.ENSP00000256442,9606.ENSP00000257934,9606.ENSP00000259008,9606.ENSP00000260363,9606.ENSP00000260731,9606.ENSP00000261597,9606.ENSP00000262105,9606.ENSP00000262300,…	TRIP13,CDC6,MCM5,AURKA,MYBL2,NCAPH,MND1,INHBA,SOX4,DLGAP5,NCAPG,CCNB1,ESPL1,BRIP1,KIF23,KIF11,NDC80,MCM4,PKMYT1,CCNE1,E2F3,KIF18A,SGOL1,MCM6,UBE2S,MCM2,CENPE,DBF4,ANLN,PLK4,NUF2,CCNA2,CDCA5,BUB1B,CCNB2,POC1A,MAD2L1,RAD21,MELK,KIAA0101,PLK1,TPX2,CDT1,BIRC5,BUB1,CDC25A,FEN1,CXCL8,CKS1B,CLSPN,AURKB,TYMS,EZH2,CDC25C,DSCC1,E2F7,SPAG5,NCAPD2,TACC3,CDKN3,CASC5,CENPA,TUBB,EIF4EBP1,FOXM1,E2F1,BLM,UBE2C,SM…
GO:0051301	Cell division	84	493	0.79	2.33e-34	9606.ENSP00000209728,9606.ENSP00000216911,9606.ENSP00000240423,9606.ENSP00000251496,9606.ENSP00000256442,9606.ENSP00000257934,9606.ENSP00000259008,9606.ENSP00000260363,9606.ENSP00000260731,9606.ENSP00000261597,9606.ENSP00000262643,9606.ENSP00000263753,9606.ENSP00000264552,9606.ENSP00000265148,9606.ENSP00000265748,9606.ENSP00000271452,9606.ENSP00000274026,9606.ENSP00000275517,9606.ENSP00000287598,…	CDC6,AURKA,NCAPH,NCAPG,CCNB1,ESPL1,BRIP1,KIF23,KIF11,NDC80,CCNE1,SGOL1,UBE2S,CENPE,ANLN,NUF2,CCNA2,CDCA5,BUB1B,CCNB2,MAD2L1,RAD21,PLK1,TPX2,CDT1,TUBA1C,BIRC5,BUB1,CDC25A,CKS1B,AURKB,SKA3,CDC25C,SPAG5,NCAPD2,TACC3,CDCA2,CASC5,TUBA1B,CENPA,TUBB,UBE2C,SMC4,CENPF,NEK2,KIF14,ASPM,CENPW,PSRC1,CEP55,KIF2C,CDC20,CDCA8,RCC1,ZWINT,KIF4A,RCC2,CKS2,CKAP2,CIT,LLGL2,PTTG1,HELLS,PRC1,INCENP,KIF20A,CDK1,SEPT3,SA…
GO:0051276	Chromosome organization	118	1066	0.6	2.93e-33	9606.ENSP00000166345,9606.ENSP00000216122,9606.ENSP00000216911,9606.ENSP00000240423,9606.ENSP00000244534,9606.ENSP00000244573,9606.ENSP00000247191,9606.ENSP00000251496,9606.ENSP00000256442,9606.ENSP00000257934,9606.ENSP00000259008,9606.ENSP00000260363,9606.ENSP00000261597,9606.ENSP00000262105,9606.ENSP00000262643,9606.ENSP00000263181,9606.ENSP00000263382,9606.ENSP00000263753,9606.ENSP00000264156,…	TRIP13,MCM5,AURKA,NCAPH,HIST1H1D,HIST1H1A,DLGAP5,NCAPG,CCNB1,ESPL1,BRIP1,KIF23,NDC80,MCM4,CCNE1,KIF18A,ASF1B,SGOL1,MCM6,POLQ,MCM2,CENPE,NUF2,CCNA2,CDCA5,CENPU,ATAD2,BUB1B,HIST1H2BD,H2AFZ,HMGB2,MAD2L1,RAD21,PLK1,CDT1,CHAF1A,BUB1,FEN1,HIST1H1E,CBX2,RMI2,AURKB,EZH2,HIST1H2BC,DSCC1,SPAG5,NCAPD2,PIF1,HIST1H1B,HIST2H2AB,HIST2H3D,CASC5,CENPA,CDCA4,HIST1H1C,HIST1H2AD,HIST1H4J,BLM,HIST1H2BK,SMC4,HIST1H2AI…
GO:0000280	Nuclear division	62	291	0.89	2.41e-29	9606.ENSP00000166345,9606.ENSP00000216911,9606.ENSP00000217026,9606.ENSP00000240423,9606.ENSP00000240488,9606.ENSP00000247191,9606.ENSP00000251496,9606.ENSP00000256442,9606.ENSP00000257934,9606.ENSP00000259008,9606.ENSP00000260363,9606.ENSP00000260731,9606.ENSP00000261597,9606.ENSP00000262643,9606.ENSP00000263181,9606.ENSP00000263753,9606.ENSP00000264552,9606.ENSP00000265148,9606.ENSP00000271452,…	TRIP13,AURKA,MYBL2,NCAPH,MND1,DLGAP5,NCAPG,CCNB1,ESPL1,BRIP1,KIF23,KIF11,NDC80,CCNE1,KIF18A,SGOL1,UBE2S,CENPE,NUF2,CDCA5,BUB1B,CCNB2,MAD2L1,RAD21,PLK1,TPX2,CDT1,BIRC5,BUB1,AURKB,DSCC1,SPAG5,NCAPD2,UBE2C,SMC4,HORMAD1,NEK2,KIF14,ASPM,TTK,PSRC1,RAD54L,KIF2C,CDC20,CDCA8,ZWINT,KIF4A,CKS2,RAD51,FANCA,PTTG1,PRC1,INCENP,CDK1,NCAPG2,KIFC1,RACGAP1,TOP2A,CCNE2,MYBL1,NUSAP1,KIF18B
GO:0048285	Organelle fission	64	318	0.86	3.43e-29	9606.ENSP00000166345,9606.ENSP00000216911,9606.ENSP00000217026,9606.ENSP00000240423,9606.ENSP00000240488,9606.ENSP00000247191,9606.ENSP00000251496,9606.ENSP00000256442,9606.ENSP00000257934,9606.ENSP00000259008,9606.ENSP00000260363,9606.ENSP00000260731,9606.ENSP00000261597,9606.ENSP00000262643,9606.ENSP00000263181,9606.ENSP00000263753,9606.ENSP00000264552,9606.ENSP00000265148,9606.ENSP00000266263,…	TRIP13,AURKA,MYBL2,NCAPH,MND1,DLGAP5,NCAPG,CCNB1,ESPL1,BRIP1,KIF23,KIF11,NDC80,CCNE1,KIF18A,SGOL1,UBE2S,CENPE,MTFP1,NUF2,CDCA5,BUB1B,CCNB2,MAD2L1,RAD21,PLK1,TPX2,CDT1,BIRC5,BUB1,AURKB,DSCC1,SPAG5,NCAPD2,UBE2C,SMC4,HORMAD1,NEK2,KIF14,ASPM,TTK,PSRC1,RAD54L,KIF2C,CDC20,CDCA8,ZWINT,KIF4A,CKS2,RAD51,FANCA,PTTG1,PRC1,INCENP,CDK1,NCAPG2,KIFC1,MTFR2,RACGAP1,TOP2A,CCNE2,MYBL1,NUSAP1,KIF18B
GO:0007059	Chromosome segregation	59	268	0.9	1.46e-28	9606.ENSP00000166345,9606.ENSP00000240423,9606.ENSP00000247191,9606.ENSP00000251496,9606.ENSP00000256442,9606.ENSP00000257934,9606.ENSP00000259008,9606.ENSP00000260363,9606.ENSP00000261597,9606.ENSP00000262643,9606.ENSP00000263181,9606.ENSP00000263753,9606.ENSP00000265148,9606.ENSP00000271452,9606.ENSP00000275517,9606.ENSP00000287598,9606.ENSP00000296509,9606.ENSP00000297338,9606.ENSP00000300093,…	TRIP13,NCAPH,DLGAP5,NCAPG,CCNB1,ESPL1,BRIP1,KIF23,NDC80,CCNE1,KIF18A,SGOL1,CENPE,NUF2,CDCA5,BUB1B,MAD2L1,RAD21,PLK1,CDT1,BIRC5,BUB1,AURKB,SKA3,DSCC1,SPAG5,NCAPD2,CDCA2,CASC5,SMC4,HORMAD1,CENPF,NEK2,KIF14,CENPW,TTK,PSRC1,SLC25A5,KIF2C,CDC20,CDCA8,SRPK1,RCC1,ZWINT,KIF4A,CENPN,PTTG1,PRC1,INCENP,NCAPG2,KIFC1,RACGAP1,TOP2A,HJURP,CCNE2,DDX11,NUSAP1,KIF18B,FAM83D
GO:0071103	DNA conformation change	64	328	0.85	1.46e-28	9606.ENSP00000216122,9606.ENSP00000240423,9606.ENSP00000244534,9606.ENSP00000244573,9606.ENSP00000251496,9606.ENSP00000256442,9606.ENSP00000259008,9606.ENSP00000262105,9606.ENSP00000263382,9606.ENSP00000264156,9606.ENSP00000264233,9606.ENSP00000265056,9606.ENSP00000275517,9606.ENSP00000281453,9606.ENSP00000289316,9606.ENSP00000296503,9606.ENSP00000301280,9606.ENSP00000307705,9606.ENSP00000321744,…	MCM5,NCAPH,HIST1H1D,HIST1H1A,NCAPG,CCNB1,BRIP1,MCM4,ASF1B,MCM6,POLQ,MCM2,CDCA5,CENPU,HIST1H2BD,HMGB2,CHAF1A,HIST1H1E,HIST1H2BC,DSCC1,NCAPD2,PIF1,HIST1H1B,HIST2H3D,CASC5,CENPA,HIST1H1C,HIST1H4J,BLM,HIST1H2BK,SMC4,HIST1H3J,PARP1,CENPW,HIST2H2BE,HIST2H3C,HMGB3,RAD54L,SRPK1,HIST1H2BL,HIST1H4H,HIST1H3D,HIST1H4C,RAD51,RFC4,CENPN,HELLS,INCENP,CDK1,HIST2H3A,NCAPG2,HMGA1,TOP2A,HJURP,CDKN2A,H2AFX,DDX11,HIS…
GO:0098813	Nuclear chromosome segregation	50	209	0.94	2.52e-25	9606.ENSP00000166345,9606.ENSP00000240423,9606.ENSP00000247191,9606.ENSP00000251496,9606.ENSP00000256442,9606.ENSP00000257934,9606.ENSP00000259008,9606.ENSP00000260363,9606.ENSP00000261597,9606.ENSP00000262643,9606.ENSP00000263181,9606.ENSP00000263753,9606.ENSP00000265148,9606.ENSP00000271452,9606.ENSP00000275517,9606.ENSP00000287598,9606.ENSP00000296509,9606.ENSP00000297338,9606.ENSP00000300093,…	TRIP13,NCAPH,DLGAP5,NCAPG,CCNB1,ESPL1,BRIP1,KIF23,NDC80,CCNE1,KIF18A,SGOL1,CENPE,NUF2,CDCA5,BUB1B,MAD2L1,RAD21,PLK1,CDT1,BUB1,AURKB,DSCC1,SPAG5,NCAPD2,CASC5,SMC4,HORMAD1,CENPF,NEK2,KIF14,TTK,PSRC1,KIF2C,CDC20,CDCA8,ZWINT,KIF4A,PTTG1,PRC1,INCENP,NCAPG2,KIFC1,RACGAP1,TOP2A,CCNE2,DDX11,NUSAP1,KIF18B,FAM83D
GO:0140014	Mitotic nuclear division	44	156	1.01	1.53e-24	9606.ENSP00000216911,9606.ENSP00000217026,9606.ENSP00000240423,9606.ENSP00000247191,9606.ENSP00000251496,9606.ENSP00000256442,9606.ENSP00000257934,9606.ENSP00000260363,9606.ENSP00000260731,9606.ENSP00000261597,9606.ENSP00000263181,9606.ENSP00000263753,9606.ENSP00000264552,9606.ENSP00000265148,9606.ENSP00000271452,9606.ENSP00000275517,9606.ENSP00000288207,9606.ENSP00000296509,9606.ENSP00000300093,…	AURKA,MYBL2,NCAPH,DLGAP5,NCAPG,CCNB1,ESPL1,KIF23,KIF11,NDC80,KIF18A,SGOL1,UBE2S,CENPE,NUF2,CDCA5,CCNB2,MAD2L1,PLK1,TPX2,CDT1,BIRC5,AURKB,DSCC1,SPAG5,NCAPD2,UBE2C,SMC4,NEK2,KIF14,PSRC1,KIF2C,CDC20,CDCA8,ZWINT,KIF4A,PRC1,INCENP,CDK1,NCAPG2,KIFC1,RACGAP1,NUSAP1,KIF18B
GO:0016043	Cellular component organization	271	5447	0.26	2.76e-24	9606.ENSP00000166345,9606.ENSP00000215743,9606.ENSP00000215754,9606.ENSP00000216122,9606.ENSP00000216341,9606.ENSP00000216911,9606.ENSP00000217026,9606.ENSP00000219150,9606.ENSP00000222271,9606.ENSP00000225655,9606.ENSP00000225964,9606.ENSP00000226284,9606.ENSP00000229239,9606.ENSP00000233143,9606.ENSP00000239940,9606.ENSP00000240423,9606.ENSP00000240488,9606.ENSP00000244534,9606.ENSP00000244573,…	TRIP13,MMP11,MIF,MCM5,GZMB,AURKA,MYBL2,CORO1A,COMP,PFN1,COL1A1,IBSP,GAPDH,TMSB10,PFN2,NCAPH,MND1,HIST1H1D,HIST1H1A,DLGAP5,NCAPG,KRT6B,NUP210,CCNB1,ADAM19,ESPL1,BRIP1,MRPL15,SULF1,MMP7,MMP13,KIF23,KIF11,NDC80,MCM4,COTL1,TYROBP,CCNE1,KIF18A,ASF1B,SGOL1,CAPG,MCM6,POLQ,UBE2S,ICAM1,MCM2,CENPE,ANLN,SQLE,MTFP1,PLK4,NUF2,SNRPG,CCNA2,PLA2G7,CDCA5,NDUFB9,CENPU,THY1,UCHL1,CXADR,ATAD2,BUB1B,CCNB2,HIST1H2BD,S…
GO:0000819	Sister chromatid segregation	41	133	1.05	4.87e-24	9606.ENSP00000240423,9606.ENSP00000247191,9606.ENSP00000251496,9606.ENSP00000256442,9606.ENSP00000257934,9606.ENSP00000260363,9606.ENSP00000261597,9606.ENSP00000263181,9606.ENSP00000263753,9606.ENSP00000265148,9606.ENSP00000271452,9606.ENSP00000275517,9606.ENSP00000287598,9606.ENSP00000296509,9606.ENSP00000297338,9606.ENSP00000300093,9606.ENSP00000301019,9606.ENSP00000302530,9606.ENSP00000313950,…	NCAPH,DLGAP5,NCAPG,CCNB1,ESPL1,KIF23,NDC80,KIF18A,SGOL1,CENPE,NUF2,CDCA5,BUB1B,MAD2L1,RAD21,PLK1,CDT1,BUB1,AURKB,DSCC1,SPAG5,NCAPD2,SMC4,HORMAD1,NEK2,KIF14,PSRC1,KIF2C,CDC20,CDCA8,ZWINT,KIF4A,PRC1,INCENP,NCAPG2,KIFC1,RACGAP1,TOP2A,DDX11,NUSAP1,KIF18B
GO:0006323	DNA packaging	48	215	0.91	3.27e-23	9606.ENSP00000240423,9606.ENSP00000244534,9606.ENSP00000244573,9606.ENSP00000251496,9606.ENSP00000256442,9606.ENSP00000263382,9606.ENSP00000265056,9606.ENSP00000275517,9606.ENSP00000281453,9606.ENSP00000289316,9606.ENSP00000296503,9606.ENSP00000301280,9606.ENSP00000307705,9606.ENSP00000321744,9606.ENSP00000325017,9606.ENSP00000330074,9606.ENSP00000333277,9606.ENSP00000335463,9606.ENSP00000336868,…	NCAPH,HIST1H1D,HIST1H1A,NCAPG,CCNB1,ASF1B,MCM2,CDCA5,CENPU,HIST1H2BD,HMGB2,CHAF1A,HIST1H1E,HIST1H2BC,NCAPD2,HIST1H1B,HIST2H3D,CASC5,CENPA,HIST1H1C,HIST1H4J,HIST1H2BK,SMC4,HIST1H3J,CENPW,HIST2H2BE,HIST2H3C,SRPK1,HIST1H2BL,HIST1H4H,HIST1H3D,HIST1H4C,CENPN,HELLS,INCENP,CDK1,HIST2H3A,NCAPG2,HMGA1,TOP2A,HJURP,CDKN2A,H2AFX,HIST2H2BF,NUSAP1,HIST1H2BJ,HIST3H2BB,HIST1H2BN
GO:0071840	Cellular component organization or biogenesis	272	5633	0.24	2.01e-22	9606.ENSP00000166345,9606.ENSP00000215743,9606.ENSP00000215754,9606.ENSP00000216122,9606.ENSP00000216341,9606.ENSP00000216911,9606.ENSP00000217026,9606.ENSP00000219150,9606.ENSP00000222271,9606.ENSP00000225655,9606.ENSP00000225964,9606.ENSP00000226284,9606.ENSP00000229239,9606.ENSP00000233143,9606.ENSP00000239940,9606.ENSP00000240423,9606.ENSP00000240488,9606.ENSP00000244534,9606.ENSP00000244573,…	TRIP13,MMP11,MIF,MCM5,GZMB,AURKA,MYBL2,CORO1A,COMP,PFN1,COL1A1,IBSP,GAPDH,TMSB10,PFN2,NCAPH,MND1,HIST1H1D,HIST1H1A,DLGAP5,NCAPG,KRT6B,NUP210,CCNB1,ADAM19,ESPL1,BRIP1,MRPL15,SULF1,MMP7,MMP13,KIF23,KIF11,NDC80,MCM4,COTL1,TYROBP,CCNE1,KIF18A,ASF1B,SGOL1,CAPG,MCM6,POLQ,UBE2S,ICAM1,MCM2,CENPE,ANLN,SQLE,MTFP1,PLK4,NUF2,SNRPG,CCNA2,PLA2G7,CDCA5,NDUFB9,CENPU,THY1,UCHL1,CXADR,ATAD2,BUB1B,CCNB2,HIST1H2BD,S…
GO:0000070	Mitotic sister chromatid segregation	35	108	1.07	6.52e-21	9606.ENSP00000240423,9606.ENSP00000247191,9606.ENSP00000251496,9606.ENSP00000256442,9606.ENSP00000257934,9606.ENSP00000260363,9606.ENSP00000261597,9606.ENSP00000263181,9606.ENSP00000263753,9606.ENSP00000265148,9606.ENSP00000271452,9606.ENSP00000275517,9606.ENSP00000296509,9606.ENSP00000300093,9606.ENSP00000301019,9606.ENSP00000313950,9606.ENSP00000322180,9606.ENSP00000323300,9606.ENSP00000325017,…	NCAPH,DLGAP5,NCAPG,CCNB1,ESPL1,KIF23,NDC80,KIF18A,SGOL1,CENPE,NUF2,CDCA5,MAD2L1,PLK1,CDT1,AURKB,DSCC1,SPAG5,NCAPD2,SMC4,NEK2,KIF14,PSRC1,KIF2C,CDC20,CDCA8,ZWINT,KIF4A,PRC1,INCENP,NCAPG2,KIFC1,RACGAP1,NUSAP1,KIF18B
GO:0065004	protein-DNA complex assembly	45	213	0.88	7.42e-21	9606.ENSP00000216122,9606.ENSP00000244534,9606.ENSP00000244573,9606.ENSP00000262105,9606.ENSP00000263382,9606.ENSP00000264156,9606.ENSP00000265056,9606.ENSP00000265148,9606.ENSP00000281453,9606.ENSP00000289316,9606.ENSP00000296503,9606.ENSP00000301019,9606.ENSP00000301280,9606.ENSP00000307705,9606.ENSP00000321744,9606.ENSP00000330074,9606.ENSP00000333277,9606.ENSP00000335463,9606.ENSP00000336868,…	MCM5,HIST1H1D,HIST1H1A,MCM4,ASF1B,MCM6,MCM2,CENPE,CENPU,HIST1H2BD,HMGB2,CDT1,CHAF1A,HIST1H1E,HIST1H2BC,HIST1H1B,HIST2H3D,CASC5,CENPA,HIST1H1C,HIST1H4J,HIST1H2BK,HIST1H3J,PARP1,CENPF,CENPW,HIST2H2BE,HIST2H3C,HIST1H2BL,HIST1H4H,HIST1H3D,HIST1H4C,RAD51,CENPN,HELLS,HIST2H3A,SMARCA4,CDC45,HJURP,H2AFX,HIST2H2BF,HIST1H2BJ,HIST3H2BB,MCM3,HIST1H2BN
GO:0071824	protein-DNA complex subunit organization	48	255	0.83	1.64e-20	9606.ENSP00000216122,9606.ENSP00000244534,9606.ENSP00000244573,9606.ENSP00000262105,9606.ENSP00000263382,9606.ENSP00000264156,9606.ENSP00000265056,9606.ENSP00000265148,9606.ENSP00000281453,9606.ENSP00000289316,9606.ENSP00000296503,9606.ENSP00000301019,9606.ENSP00000301280,9606.ENSP00000307705,9606.ENSP00000321744,9606.ENSP00000330074,9606.ENSP00000333277,9606.ENSP00000335463,9606.ENSP00000336868,…	MCM5,HIST1H1D,HIST1H1A,MCM4,ASF1B,MCM6,MCM2,CENPE,CENPU,HIST1H2BD,HMGB2,CDT1,CHAF1A,HIST1H1E,HIST1H2BC,HIST1H1B,HIST2H3D,CASC5,CENPA,HIST1H1C,HIST1H4J,HIST1H2BK,HIST1H3J,HIST3H2A,PARP1,CENPF,CENPW,HIST2H2BE,HIST2H3C,HIST1H2BL,HIST1H4H,HIST1H3D,HIST1H4C,RAD51,CENPN,HELLS,HIST2H3A,SMARCA4,HMGA1,CDC45,HJURP,H2AFX,HIST2H2BF,ANP32E,HIST1H2BJ,HIST3H2BB,MCM3,HIST1H2BN
GO:0006996	Organelle organization	192	3450	0.31	8.12e-20	9606.ENSP00000166345,9606.ENSP00000216122,9606.ENSP00000216341,9606.ENSP00000216911,9606.ENSP00000217026,9606.ENSP00000219150,9606.ENSP00000225655,9606.ENSP00000229239,9606.ENSP00000233143,9606.ENSP00000239940,9606.ENSP00000240423,9606.ENSP00000240488,9606.ENSP00000244534,9606.ENSP00000244573,9606.ENSP00000247191,9606.ENSP00000251496,9606.ENSP00000252252,9606.ENSP00000256442,9606.ENSP00000257934,…	TRIP13,MCM5,GZMB,AURKA,MYBL2,CORO1A,PFN1,GAPDH,TMSB10,PFN2,NCAPH,MND1,HIST1H1D,HIST1H1A,DLGAP5,NCAPG,KRT6B,CCNB1,ESPL1,BRIP1,KIF23,KIF11,NDC80,MCM4,TYROBP,CCNE1,KIF18A,ASF1B,SGOL1,CAPG,MCM6,POLQ,UBE2S,MCM2,CENPE,ANLN,SQLE,MTFP1,PLK4,NUF2,CCNA2,CDCA5,NDUFB9,CENPU,THY1,CXADR,ATAD2,BUB1B,CCNB2,HIST1H2BD,SLAMF8,H2AFZ,POC1A,HMGB2,MAD2L1,RAD21,KIAA0101,PLK1,TPX2,CDT1,TUBA1C,CHAF1A,EVPL,BIRC5,KRT16,BUB1…
GO:0051983	Regulation of chromosome segregation	33	104	1.06	1.82e-19	9606.ENSP00000166345,9606.ENSP00000209728,9606.ENSP00000247191,9606.ENSP00000256442,9606.ENSP00000257934,9606.ENSP00000261597,9606.ENSP00000265148,9606.ENSP00000275517,9606.ENSP00000287598,9606.ENSP00000296509,9606.ENSP00000297338,9606.ENSP00000300093,9606.ENSP00000301019,9606.ENSP00000301633,9606.ENSP00000302530,9606.ENSP00000305480,9606.ENSP00000310356,9606.ENSP00000313950,9606.ENSP00000318977,…	TRIP13,CDC6,DLGAP5,CCNB1,ESPL1,NDC80,CENPE,CDCA5,BUB1B,MAD2L1,RAD21,PLK1,CDT1,BIRC5,BUB1,FEN1,RMI2,AURKB,GEN1,SPAG5,TACC3,UBE2C,HORMAD1,CENPF,NEK2,MKI67,TTK,KIF2C,CDC20,RCC2,PTTG1,RACGAP1,DDX11
GO:0051726	Regulation of cell cycle	101	1230	0.47	5.4e-19	9606.ENSP00000166345,9606.ENSP00000209728,9606.ENSP00000215754,9606.ENSP00000216911,9606.ENSP00000217026,9606.ENSP00000242208,9606.ENSP00000244745,9606.ENSP00000247191,9606.ENSP00000256442,9606.ENSP00000257934,9606.ENSP00000259008,9606.ENSP00000260363,9606.ENSP00000260731,9606.ENSP00000261597,9606.ENSP00000262300,9606.ENSP00000262643,9606.ENSP00000262904,9606.ENSP00000265148,9606.ENSP00000265728,…	TRIP13,CDC6,MIF,AURKA,MYBL2,INHBA,SOX4,DLGAP5,CCNB1,ESPL1,BRIP1,KIF23,KIF11,NDC80,PKMYT1,CCNE1,E2F3,CENPE,DBF4,ANLN,PLK4,CCNA2,CDCA5,BUB1B,CCNB2,POC1A,MAD2L1,RAD21,KIAA0101,PLK1,TPX2,CDT1,BIRC5,BUB1,CDC25A,FEN1,CXCL8,RMI2,CKS1B,CLSPN,AURKB,GEN1,EZH2,CALR,CDC25C,SOX11,E2F7,SPAG5,TACC3,LIN9,CDKN3,TUBB,EIF4EBP1,FOXM1,E2F1,BLM,UBE2C,RRM2,HORMAD1,E2F2,CENPF,DTL,NEK2,KIF14,ASPM,MKI67,TTK,PSRC1,ORC1,STI…
GO:0006260	DNA replication	41	205	0.86	3.62e-18	9606.ENSP00000209728,9606.ENSP00000216122,9606.ENSP00000221486,9606.ENSP00000259008,9606.ENSP00000261692,9606.ENSP00000262105,9606.ENSP00000262643,9606.ENSP00000264156,9606.ENSP00000264233,9606.ENSP00000265056,9606.ENSP00000265728,9606.ENSP00000300035,9606.ENSP00000301019,9606.ENSP00000301280,9606.ENSP00000305480,9606.ENSP00000310356,9606.ENSP00000312995,9606.ENSP00000318977,9606.ENSP00000322180,…	CDC6,MCM5,RNASEH2A,BRIP1,CDK2AP1,MCM4,CCNE1,MCM6,POLQ,MCM2,DBF4,KIAA0101,CDT1,CHAF1A,FEN1,RMI2,CLSPN,GEN1,DSCC1,PIF1,BLM,RRM2,WDHD1,EXO1,DTL,ORC1,PCNA,RAD51,RFC4,CDK1,TONSL,CDC7,HMGA1,CDC45,MCM10,ALYREF,CCNE2,DDX11,TIMELESS,MCM3,RECQL4
GO:0010564	Regulation of cell cycle process	76	760	0.56	3.95e-18	9606.ENSP00000166345,9606.ENSP00000209728,9606.ENSP00000215754,9606.ENSP00000216911,9606.ENSP00000244745,9606.ENSP00000247191,9606.ENSP00000256442,9606.ENSP00000257934,9606.ENSP00000260363,9606.ENSP00000260731,9606.ENSP00000261597,9606.ENSP00000262300,9606.ENSP00000265148,9606.ENSP00000265728,9606.ENSP00000265748,9606.ENSP00000270861,9606.ENSP00000275517,9606.ENSP00000287598,9606.ENSP00000296484,…	TRIP13,CDC6,MIF,AURKA,SOX4,DLGAP5,CCNB1,ESPL1,KIF23,KIF11,NDC80,PKMYT1,CENPE,DBF4,ANLN,PLK4,CDCA5,BUB1B,POC1A,MAD2L1,RAD21,PLK1,TPX2,CDT1,BIRC5,BUB1,CDC25A,FEN1,RMI2,CLSPN,AURKB,GEN1,EZH2,CALR,CDC25C,E2F7,SPAG5,TACC3,TUBB,FOXM1,E2F1,BLM,UBE2C,RRM2,HORMAD1,CENPF,DTL,NEK2,KIF14,MKI67,TTK,PSRC1,ORC1,STIL,CDC20,RCC1,RCC2,UBD,PCNA,RAD51,CIT,HMMR,PTTG1,PRC1,INCENP,KIF20A,CDK1,CDC7,RANBP1,RACGAP1,CDC45,…
GO:0044770	Cell cycle phase transition	47	289	0.77	7.79e-18	9606.ENSP00000209728,9606.ENSP00000216122,9606.ENSP00000216911,9606.ENSP00000242208,9606.ENSP00000256442,9606.ENSP00000262105,9606.ENSP00000262300,9606.ENSP00000262643,9606.ENSP00000262904,9606.ENSP00000264156,9606.ENSP00000264552,9606.ENSP00000265056,9606.ENSP00000265728,9606.ENSP00000270861,9606.ENSP00000274026,9606.ENSP00000288207,9606.ENSP00000298048,9606.ENSP00000300093,9606.ENSP00000301019,…	CDC6,MCM5,AURKA,INHBA,CCNB1,MCM4,PKMYT1,CCNE1,E2F3,MCM6,UBE2S,MCM2,DBF4,PLK4,CCNA2,CCNB2,MELK,PLK1,CDT1,BIRC5,CDC25A,CKS1B,TYMS,CDC25C,E2F7,TACC3,CDKN3,TUBB,EIF4EBP1,FOXM1,E2F1,UBE2C,RRM2,IQGAP3,NEK2,ORC1,RCC1,CKS2,PCNA,CDK1,CDC7,CDC45,MCM10,CDKN2A,CCNE2,TIMELESS,MCM3
GO:0044772	Mitotic cell cycle phase transition	46	280	0.78	1.37e-17	9606.ENSP00000209728,9606.ENSP00000216122,9606.ENSP00000216911,9606.ENSP00000242208,9606.ENSP00000256442,9606.ENSP00000262105,9606.ENSP00000262300,9606.ENSP00000262643,9606.ENSP00000262904,9606.ENSP00000264156,9606.ENSP00000264552,9606.ENSP00000265056,9606.ENSP00000265728,9606.ENSP00000270861,9606.ENSP00000274026,9606.ENSP00000288207,9606.ENSP00000298048,9606.ENSP00000300093,9606.ENSP00000301019,…	CDC6,MCM5,AURKA,INHBA,CCNB1,MCM4,PKMYT1,CCNE1,E2F3,MCM6,UBE2S,MCM2,DBF4,PLK4,CCNA2,CCNB2,MELK,PLK1,CDT1,BIRC5,CDC25A,CKS1B,TYMS,CDC25C,E2F7,TACC3,CDKN3,TUBB,EIF4EBP1,FOXM1,E2F1,UBE2C,RRM2,IQGAP3,NEK2,ORC1,RCC1,CKS2,PCNA,CDK1,CDC7,CDC45,MCM10,CDKN2A,CCNE2,MCM3
GO:0034728	Nucleosome organization	37	176	0.88	6.34e-17	9606.ENSP00000244534,9606.ENSP00000244573,9606.ENSP00000263382,9606.ENSP00000265056,9606.ENSP00000281453,9606.ENSP00000289316,9606.ENSP00000296503,9606.ENSP00000301280,9606.ENSP00000307705,9606.ENSP00000321744,9606.ENSP00000330074,9606.ENSP00000333277,9606.ENSP00000335463,9606.ENSP00000336868,9606.ENSP00000339566,9606.ENSP00000347168,9606.ENSP00000349430,9606.ENSP00000352252,9606.ENSP00000355656,…	HIST1H1D,HIST1H1A,ASF1B,MCM2,CENPU,HIST1H2BD,HMGB2,CHAF1A,HIST1H1E,HIST1H2BC,HIST1H1B,HIST2H3D,CASC5,CENPA,HIST1H1C,HIST1H4J,HIST1H2BK,HIST1H3J,HIST3H2A,CENPW,HIST2H2BE,HIST2H3C,HIST1H2BL,HIST1H4H,HIST1H3D,HIST1H4C,CENPN,HIST2H3A,SMARCA4,HMGA1,HJURP,H2AFX,HIST2H2BF,ANP32E,HIST1H2BJ,HIST3H2BB,HIST1H2BN
GO:0006334	Nucleosome assembly	33	135	0.95	1.22e-16	9606.ENSP00000244534,9606.ENSP00000244573,9606.ENSP00000263382,9606.ENSP00000265056,9606.ENSP00000281453,9606.ENSP00000289316,9606.ENSP00000296503,9606.ENSP00000301280,9606.ENSP00000307705,9606.ENSP00000321744,9606.ENSP00000330074,9606.ENSP00000333277,9606.ENSP00000335463,9606.ENSP00000336868,9606.ENSP00000339566,9606.ENSP00000347168,9606.ENSP00000349430,9606.ENSP00000352252,9606.ENSP00000357308,…	HIST1H1D,HIST1H1A,ASF1B,MCM2,CENPU,HIST1H2BD,HMGB2,CHAF1A,HIST1H1E,HIST1H2BC,HIST1H1B,HIST2H3D,CASC5,CENPA,HIST1H1C,HIST1H4J,HIST1H2BK,HIST1H3J,CENPW,HIST2H2BE,HIST2H3C,HIST1H2BL,HIST1H4H,HIST1H3D,HIST1H4C,CENPN,HIST2H3A,HJURP,H2AFX,HIST2H2BF,HIST1H2BJ,HIST3H2BB,HIST1H2BN
GO:0006333	Chromatin assembly or disassembly	38	193	0.85	1.32e-16	9606.ENSP00000244534,9606.ENSP00000244573,9606.ENSP00000263382,9606.ENSP00000265056,9606.ENSP00000281453,9606.ENSP00000289316,9606.ENSP00000296503,9606.ENSP00000301280,9606.ENSP00000307705,9606.ENSP00000321744,9606.ENSP00000330074,9606.ENSP00000333277,9606.ENSP00000335463,9606.ENSP00000336868,9606.ENSP00000339566,9606.ENSP00000347168,9606.ENSP00000349430,9606.ENSP00000352252,9606.ENSP00000355656,…	HIST1H1D,HIST1H1A,ASF1B,MCM2,CENPU,HIST1H2BD,HMGB2,CHAF1A,HIST1H1E,HIST1H2BC,HIST1H1B,HIST2H3D,CASC5,CENPA,HIST1H1C,HIST1H4J,HIST1H2BK,HIST1H3J,HIST3H2A,CENPW,HIST2H2BE,HIST2H3C,HIST1H2BL,HIST1H4H,HIST1H3D,HIST1H4C,CENPN,HELLS,HIST2H3A,SMARCA4,HMGA1,HJURP,CDKN2A,H2AFX,HIST2H2BF,HIST1H2BJ,HIST3H2BB,HIST1H2BN
GO:0031497	Chromatin assembly	36	172	0.88	2.05e-16	9606.ENSP00000244534,9606.ENSP00000244573,9606.ENSP00000263382,9606.ENSP00000265056,9606.ENSP00000281453,9606.ENSP00000289316,9606.ENSP00000296503,9606.ENSP00000301280,9606.ENSP00000307705,9606.ENSP00000321744,9606.ENSP00000330074,9606.ENSP00000333277,9606.ENSP00000335463,9606.ENSP00000336868,9606.ENSP00000339566,9606.ENSP00000347168,9606.ENSP00000349430,9606.ENSP00000352252,9606.ENSP00000357308,…	HIST1H1D,HIST1H1A,ASF1B,MCM2,CENPU,HIST1H2BD,HMGB2,CHAF1A,HIST1H1E,HIST1H2BC,HIST1H1B,HIST2H3D,CASC5,CENPA,HIST1H1C,HIST1H4J,HIST1H2BK,HIST1H3J,CENPW,HIST2H2BE,HIST2H3C,HIST1H2BL,HIST1H4H,HIST1H3D,HIST1H4C,CENPN,HELLS,HIST2H3A,HMGA1,HJURP,CDKN2A,H2AFX,HIST2H2BF,HIST1H2BJ,HIST3H2BB,HIST1H2BN
GO:0006259	DNA metabolic process	72	750	0.54	2.98e-16	9606.ENSP00000166345,9606.ENSP00000209728,9606.ENSP00000216122,9606.ENSP00000221486,9606.ENSP00000228843,9606.ENSP00000240488,9606.ENSP00000259008,9606.ENSP00000262105,9606.ENSP00000262643,9606.ENSP00000264156,9606.ENSP00000264233,9606.ENSP00000264596,9606.ENSP00000265056,9606.ENSP00000275517,9606.ENSP00000296503,9606.ENSP00000297338,9606.ENSP00000300035,9606.ENSP00000301280,9606.ENSP00000301634,…	TRIP13,CDC6,MCM5,RNASEH2A,RAD51AP1,MND1,BRIP1,MCM4,CCNE1,MCM6,POLQ,NEIL3,MCM2,CDCA5,HMGB2,RAD21,KIAA0101,CHAF1A,TK1,FEN1,ISG20,RMI2,FANCI,CLSPN,TYMS,GEN1,EZH2,APOBEC3B,PIF1,LIN9,NME1,FOXM1,HIST1H4J,BLM,DNMT1,WDHD1,EXO1,HIST3H2A,PARP1,CENPF,DTL,UBE2T,HMGB3,ORC1,RAD54L,HIST1H4H,HIST1H4C,PCNA,ISG15,RAD51,FANCA,RFC4,PTTG1,HELLS,CDK1,CBSL,FANCB,TONSL,CDC7,HMGA1,CDC45,TOP2A,MCM10,ALYREF,CCNE2,PGBD5,H2A…
GO:1902850	Microtubule cytoskeleton organization involved in mitosis	30	112	0.99	5.5e-16	9606.ENSP00000216911,9606.ENSP00000217026,9606.ENSP00000256442,9606.ENSP00000257934,9606.ENSP00000260363,9606.ENSP00000260731,9606.ENSP00000261597,9606.ENSP00000265148,9606.ENSP00000271452,9606.ENSP00000296484,9606.ENSP00000296509,9606.ENSP00000300093,9606.ENSP00000300403,9606.ENSP00000301633,9606.ENSP00000313950,9606.ENSP00000326550,9606.ENSP00000336868,9606.ENSP00000355966,9606.ENSP00000358813,…	AURKA,MYBL2,CCNB1,ESPL1,KIF23,KIF11,NDC80,CENPE,NUF2,POC1A,MAD2L1,PLK1,TPX2,BIRC5,AURKB,TACC3,CENPA,NEK2,TTK,STIL,CDC20,RCC1,KIF4A,PRC1,WDR62,SAPCD2,KIFC1,RACGAP1,STMN1,NUSAP1
GO:0033045	Regulation of sister chromatid segregation	26	83	1.06	4.58e-15	9606.ENSP00000166345,9606.ENSP00000209728,9606.ENSP00000247191,9606.ENSP00000256442,9606.ENSP00000257934,9606.ENSP00000261597,9606.ENSP00000265148,9606.ENSP00000275517,9606.ENSP00000287598,9606.ENSP00000296509,9606.ENSP00000297338,9606.ENSP00000300093,9606.ENSP00000301019,9606.ENSP00000301633,9606.ENSP00000302530,9606.ENSP00000305480,9606.ENSP00000310356,9606.ENSP00000313950,9606.ENSP00000318977,…	TRIP13,CDC6,DLGAP5,CCNB1,ESPL1,NDC80,CENPE,CDCA5,BUB1B,MAD2L1,RAD21,PLK1,CDT1,BIRC5,BUB1,FEN1,RMI2,AURKB,GEN1,TACC3,UBE2C,CENPF,TTK,CDC20,PTTG1,DDX11
GO:0051783	Regulation of nuclear division	35	186	0.83	1.06e-14	9606.ENSP00000166345,9606.ENSP00000209728,9606.ENSP00000216911,9606.ENSP00000247191,9606.ENSP00000256442,9606.ENSP00000257934,9606.ENSP00000260731,9606.ENSP00000261597,9606.ENSP00000262300,9606.ENSP00000265148,9606.ENSP00000265748,9606.ENSP00000275517,9606.ENSP00000287598,9606.ENSP00000296509,9606.ENSP00000297338,9606.ENSP00000300093,9606.ENSP00000301019,9606.ENSP00000301633,9606.ENSP00000302530,…	TRIP13,CDC6,AURKA,DLGAP5,CCNB1,ESPL1,KIF11,NDC80,PKMYT1,CENPE,ANLN,CDCA5,BUB1B,MAD2L1,RAD21,PLK1,CDT1,BIRC5,BUB1,AURKB,GEN1,CALR,CDC25C,TACC3,UBE2C,HORMAD1,CENPF,NEK2,MKI67,TTK,CDC20,RCC1,PTTG1,RANBP1,NUSAP1
GO:0007088	Regulation of mitotic nuclear division	33	162	0.87	1.12e-14	9606.ENSP00000166345,9606.ENSP00000209728,9606.ENSP00000216911,9606.ENSP00000247191,9606.ENSP00000256442,9606.ENSP00000257934,9606.ENSP00000260731,9606.ENSP00000261597,9606.ENSP00000262300,9606.ENSP00000265148,9606.ENSP00000265748,9606.ENSP00000275517,9606.ENSP00000287598,9606.ENSP00000296509,9606.ENSP00000297338,9606.ENSP00000300093,9606.ENSP00000301019,9606.ENSP00000301633,9606.ENSP00000302530,…	TRIP13,CDC6,AURKA,DLGAP5,CCNB1,ESPL1,KIF11,NDC80,PKMYT1,CENPE,ANLN,CDCA5,BUB1B,MAD2L1,RAD21,PLK1,CDT1,BIRC5,BUB1,AURKB,GEN1,CDC25C,TACC3,UBE2C,CENPF,NEK2,MKI67,TTK,CDC20,RCC1,PTTG1,RANBP1,NUSAP1
GO:0002376	Immune system process	142	2481	0.32	1.92e-14	9606.ENSP00000215754,9606.ENSP00000216117,9606.ENSP00000216341,9606.ENSP00000219150,9606.ENSP00000225964,9606.ENSP00000226279,9606.ENSP00000228928,9606.ENSP00000229239,9606.ENSP00000236147,9606.ENSP00000236671,9606.ENSP00000242208,9606.ENSP00000244745,9606.ENSP00000250092,9606.ENSP00000250160,9606.ENSP00000256412,9606.ENSP00000257570,9606.ENSP00000260118,9606.ENSP00000260363,9606.ENSP00000260731,…	MIF,HMOX1,GZMB,CORO1A,COL1A1,CD38,OAS3,GAPDH,SELL,CTSD,INHBA,SOX4,CD68,WISP1,ADAMDEC1,OASL,GGH,KIF23,KIF11,LYZ,SLC7A5,COTL1,TYROBP,PRDX1,KIF18A,EPCAM,POLQ,CD80,ICAM1,CENPE,ANLN,SECTM1,S100A11,THY1,CXADR,CXCL13,CCNB2,SLAMF8,FCER1G,CSTB,S100P,HMGB2,MELK,KRT16,CLEC7A,CTLA4,CXCL10,CXCL8,ISG20,CXCL11,PPP1R14B,TRIM59,PKM,CALR,HIST1H2BC,MMP1,KIF15,PMAIP1,APOBEC3B,CD86,EPHB3,SHMT2,TUBB,PLAUR,FPR3,OAS2,IF…
GO:0007346	Regulation of mitotic cell cycle	64	676	0.54	5.14e-14	9606.ENSP00000166345,9606.ENSP00000209728,9606.ENSP00000216911,9606.ENSP00000244745,9606.ENSP00000247191,9606.ENSP00000256442,9606.ENSP00000257934,9606.ENSP00000260731,9606.ENSP00000261597,9606.ENSP00000262300,9606.ENSP00000265148,9606.ENSP00000265748,9606.ENSP00000270861,9606.ENSP00000275517,9606.ENSP00000287598,9606.ENSP00000296509,9606.ENSP00000297338,9606.ENSP00000300093,9606.ENSP00000300403,…	TRIP13,CDC6,AURKA,SOX4,DLGAP5,CCNB1,ESPL1,KIF11,NDC80,PKMYT1,CENPE,ANLN,PLK4,CDCA5,BUB1B,MAD2L1,RAD21,PLK1,TPX2,CDT1,BIRC5,BUB1,CDC25A,CKS1B,CLSPN,AURKB,GEN1,EZH2,CDC25C,E2F7,TACC3,TUBB,EIF4EBP1,E2F1,BLM,UBE2C,CENPF,DTL,NEK2,KIF14,MKI67,TTK,PSRC1,ORC1,CDC20,RCC1,ZWINT,RCC2,CKS2,UBD,PCNA,FOXC1,HMMR,PTTG1,MST4,INCENP,CDK1,CDC7,RANBP1,CDC45,TOP2A,CDKN2A,NUSAP1,E2F8
GO:0009987	Cellular process	488	15024	0.07	8.18e-14	9606.ENSP00000005286,9606.ENSP00000166345,9606.ENSP00000209718,9606.ENSP00000209728,9606.ENSP00000215743,9606.ENSP00000215754,9606.ENSP00000215794,9606.ENSP00000216117,9606.ENSP00000216122,9606.ENSP00000216127,9606.ENSP00000216341,9606.ENSP00000216911,9606.ENSP00000217026,9606.ENSP00000217086,9606.ENSP00000218230,9606.ENSP00000219150,9606.ENSP00000221486,9606.ENSP00000222271,9606.ENSP00000225655,…	TMEM132A,TRIP13,KRT23,CDC6,MMP11,MIF,USP18,HMOX1,MCM5,RASD2,GZMB,AURKA,MYBL2,SALL4,PCSK1N,CORO1A,RNASEH2A,COMP,PFN1,COL1A1,CD38,IBSP,RAD51AP1,OAS3,GAPDH,TPI1,MDFI,TMSB10,HSPE1,SELL,CTSD,PFN2,NCAPH,MND1,INHBA,DDX39A,HIST1H1D,HIST1H1A,SOX4,DLGAP5,SDF2L1,CD68,WISP1,NCAPG,KRT6B,NUP210,CCNB1,CMPK2,ADAM19,OASL,TROAP,ESPL1,IGF2BP3,BRIP1,CLPS,MRPL15,GGH,SULF1,MMP7,MMP13,KIF23,KIF11,LYZ,LMNB1,NDC80,SLC7A5…
GO:0010965	Regulation of mitotic sister chromatid separation	22	60	1.12	8.86e-14	9606.ENSP00000166345,9606.ENSP00000209728,9606.ENSP00000247191,9606.ENSP00000256442,9606.ENSP00000257934,9606.ENSP00000261597,9606.ENSP00000265148,9606.ENSP00000287598,9606.ENSP00000296509,9606.ENSP00000297338,9606.ENSP00000300093,9606.ENSP00000301019,9606.ENSP00000301633,9606.ENSP00000302530,9606.ENSP00000313950,9606.ENSP00000318977,9606.ENSP00000326550,9606.ENSP00000348838,9606.ENSP00000355922,…	TRIP13,CDC6,DLGAP5,CCNB1,ESPL1,NDC80,CENPE,BUB1B,MAD2L1,RAD21,PLK1,CDT1,BIRC5,BUB1,AURKB,GEN1,TACC3,UBE2C,CENPF,TTK,CDC20,PTTG1
GO:0045787	Positive regulation of cell cycle	47	388	0.64	1.77e-13	9606.ENSP00000209728,9606.ENSP00000215754,9606.ENSP00000216911,9606.ENSP00000244745,9606.ENSP00000247191,9606.ENSP00000256442,9606.ENSP00000257934,9606.ENSP00000260363,9606.ENSP00000261597,9606.ENSP00000265728,9606.ENSP00000270861,9606.ENSP00000275517,9606.ENSP00000296484,9606.ENSP00000296509,9606.ENSP00000297338,9606.ENSP00000301019,9606.ENSP00000301633,9606.ENSP00000303706,9606.ENSP00000305480,…	CDC6,MIF,AURKA,SOX4,DLGAP5,CCNB1,ESPL1,KIF23,NDC80,DBF4,PLK4,CDCA5,POC1A,MAD2L1,RAD21,CDT1,BIRC5,CDC25A,FEN1,CKS1B,AURKB,GEN1,EZH2,CALR,CDC25C,E2F7,SPAG5,EIF4EBP1,E2F1,UBE2C,DTL,KIF14,PSRC1,RCC2,CKS2,PCNA,CIT,CDK1,CDC7,RANBP1,RACGAP1,CDC45,CDKN2A,DDX11,NUSAP1,E2F8,FAM83D
GO:0007051	Spindle organization	30	145	0.88	1.89e-13	9606.ENSP00000216911,9606.ENSP00000217026,9606.ENSP00000256442,9606.ENSP00000257934,9606.ENSP00000260363,9606.ENSP00000260731,9606.ENSP00000261597,9606.ENSP00000265148,9606.ENSP00000271452,9606.ENSP00000296484,9606.ENSP00000300403,9606.ENSP00000301633,9606.ENSP00000313950,9606.ENSP00000323300,9606.ENSP00000326550,9606.ENSP00000339001,9606.ENSP00000355966,9606.ENSP00000356379,9606.ENSP00000357308,…	AURKA,MYBL2,CCNB1,ESPL1,KIF23,KIF11,NDC80,CENPE,NUF2,POC1A,TPX2,BIRC5,AURKB,SPAG5,TACC3,TUBB,NEK2,ASPM,CENPW,TTK,STIL,CDC20,RCC1,KIF4A,PRC1,INCENP,WDR62,KIFC1,RACGAP1,STMN1
GO:0007052	Mitotic spindle organization	24	81	1.03	1.89e-13	9606.ENSP00000216911,9606.ENSP00000217026,9606.ENSP00000256442,9606.ENSP00000260363,9606.ENSP00000260731,9606.ENSP00000261597,9606.ENSP00000265148,9606.ENSP00000271452,9606.ENSP00000296484,9606.ENSP00000300403,9606.ENSP00000301633,9606.ENSP00000313950,9606.ENSP00000326550,9606.ENSP00000355966,9606.ENSP00000358813,9606.ENSP00000360944,9606.ENSP00000361540,9606.ENSP00000362937,9606.ENSP00000363524,…	AURKA,MYBL2,CCNB1,KIF23,KIF11,NDC80,CENPE,NUF2,POC1A,TPX2,BIRC5,AURKB,TACC3,NEK2,TTK,STIL,CDC20,RCC1,KIF4A,PRC1,WDR62,KIFC1,RACGAP1,STMN1
GO:0090068	Positive regulation of cell cycle process	41	294	0.7	1.89e-13	9606.ENSP00000209728,9606.ENSP00000216911,9606.ENSP00000244745,9606.ENSP00000247191,9606.ENSP00000256442,9606.ENSP00000257934,9606.ENSP00000260363,9606.ENSP00000261597,9606.ENSP00000265728,9606.ENSP00000270861,9606.ENSP00000275517,9606.ENSP00000296484,9606.ENSP00000296509,9606.ENSP00000297338,9606.ENSP00000301019,9606.ENSP00000301633,9606.ENSP00000303706,9606.ENSP00000305480,9606.ENSP00000313950,…	CDC6,AURKA,SOX4,DLGAP5,CCNB1,ESPL1,KIF23,NDC80,DBF4,PLK4,CDCA5,POC1A,MAD2L1,RAD21,CDT1,BIRC5,CDC25A,FEN1,AURKB,GEN1,EZH2,CDC25C,E2F7,SPAG5,E2F1,UBE2C,DTL,KIF14,RCC2,PCNA,CIT,CDK1,CDC7,RANBP1,RACGAP1,CDC45,CDKN2A,DDX11,NUSAP1,E2F8,FAM83D
GO:0006950	Response to stress	174	3485	0.26	4.28e-13	9606.ENSP00000166345,9606.ENSP00000215754,9606.ENSP00000216117,9606.ENSP00000216122,9606.ENSP00000216341,9606.ENSP00000216911,9606.ENSP00000218230,9606.ENSP00000219150,9606.ENSP00000221486,9606.ENSP00000222271,9606.ENSP00000225964,9606.ENSP00000226279,9606.ENSP00000228843,9606.ENSP00000228928,9606.ENSP00000229239,9606.ENSP00000233893,9606.ENSP00000242208,9606.ENSP00000244745,9606.ENSP00000248958,…	TRIP13,MIF,HMOX1,MCM5,GZMB,AURKA,PCSK1N,CORO1A,RNASEH2A,COMP,COL1A1,CD38,RAD51AP1,OAS3,GAPDH,HSPE1,INHBA,SOX4,SDF2L1,CD68,CCNB1,OASL,BRIP1,LYZ,MCM4,COTL1,TYROBP,PRDX1,MCM6,POLQ,NEIL3,ICAM1,MCM2,TFEC,GAL,ERP27,BCL2A1,CCNA2,CDCA5,GSDMC,DSC2,UCHL1,CXADR,PDIA4,CXCL13,SLAMF8,FCER1G,HMGB2,RAD21,MELK,KIAA0101,PLK1,CHAF1A,SLC39A4,EVPL,KRT16,CLEC7A,CTLA4,FEN1,CXCL10,CXCL8,ISG20,CXCL11,PPP1R14B,RMI2,FANCI,…
GO:0000226	Microtubule cytoskeleton organization	52	492	0.58	6.66e-13	9606.ENSP00000216911,9606.ENSP00000217026,9606.ENSP00000229239,9606.ENSP00000256442,9606.ENSP00000257934,9606.ENSP00000260363,9606.ENSP00000260731,9606.ENSP00000261597,9606.ENSP00000263181,9606.ENSP00000263753,9606.ENSP00000265148,9606.ENSP00000270861,9606.ENSP00000271452,9606.ENSP00000296484,9606.ENSP00000296509,9606.ENSP00000300035,9606.ENSP00000300093,9606.ENSP00000300403,9606.ENSP00000301072,…	AURKA,MYBL2,GAPDH,CCNB1,ESPL1,KIF23,KIF11,NDC80,KIF18A,SGOL1,CENPE,PLK4,NUF2,POC1A,MAD2L1,KIAA0101,PLK1,TPX2,TUBA1C,BIRC5,AURKB,SPAG5,TACC3,TUBA1B,CENPA,TUBB,NEK2,ASPM,CENPW,TTK,PSRC1,STIL,KIF2C,CDC20,RCC1,KIF4A,CALML5,TTLL4,LLGL2,PRC1,INCENP,KIF20A,CDK1,WDR62,SAPCD2,KIFC1,RACGAP1,STMN1,GAS2L3,ENSG00000258947,NUSAP1,KIF18B
GO:0044843	Cell cycle g1/s phase transition	28	130	0.89	6.73e-13	9606.ENSP00000209728,9606.ENSP00000216122,9606.ENSP00000242208,9606.ENSP00000262105,9606.ENSP00000262643,9606.ENSP00000262904,9606.ENSP00000264156,9606.ENSP00000265056,9606.ENSP00000265728,9606.ENSP00000274026,9606.ENSP00000301019,9606.ENSP00000303706,9606.ENSP00000315644,9606.ENSP00000323246,9606.ENSP00000335357,9606.ENSP00000340691,9606.ENSP00000345571,9606.ENSP00000353770,9606.ENSP00000354451,…	CDC6,MCM5,INHBA,MCM4,CCNE1,E2F3,MCM6,MCM2,DBF4,CCNA2,CDT1,CDC25A,TYMS,E2F7,CDKN3,EIF4EBP1,E2F1,RRM2,IQGAP3,ORC1,RCC1,PCNA,CDC7,CDC45,MCM10,CDKN2A,CCNE2,MCM3
GO:0006261	DNA-dependent DNA replication	27	119	0.92	7e-13	9606.ENSP00000209728,9606.ENSP00000216122,9606.ENSP00000261692,9606.ENSP00000262105,9606.ENSP00000262643,9606.ENSP00000264156,9606.ENSP00000264233,9606.ENSP00000265056,9606.ENSP00000301019,9606.ENSP00000305480,9606.ENSP00000318977,9606.ENSP00000347232,9606.ENSP00000353793,9606.ENSP00000360623,9606.ENSP00000368458,9606.ENSP00000372088,9606.ENSP00000376272,9606.ENSP00000386239,9606.ENSP00000399888,…	CDC6,MCM5,CDK2AP1,MCM4,CCNE1,MCM6,POLQ,MCM2,CDT1,FEN1,GEN1,BLM,WDHD1,ORC1,PCNA,RAD51,RFC4,TONSL,HMGA1,CDC45,MCM10,ALYREF,CCNE2,DDX11,TIMELESS,MCM3,RECQL4
GO:0000075	Cell cycle checkpoint	33	198	0.78	1.37e-12	9606.ENSP00000166345,9606.ENSP00000209728,9606.ENSP00000216911,9606.ENSP00000244745,9606.ENSP00000256442,9606.ENSP00000259008,9606.ENSP00000287598,9606.ENSP00000296509,9606.ENSP00000300093,9606.ENSP00000301019,9606.ENSP00000301633,9606.ENSP00000302530,9606.ENSP00000312995,9606.ENSP00000313950,9606.ENSP00000321656,9606.ENSP00000322568,9606.ENSP00000323246,9606.ENSP00000345571,9606.ENSP00000347232,…	TRIP13,CDC6,AURKA,SOX4,CCNB1,BRIP1,BUB1B,MAD2L1,PLK1,CDT1,BIRC5,BUB1,CLSPN,AURKB,CDC25C,SOX11,E2F7,E2F1,BLM,HORMAD1,CENPF,DTL,TTK,ORC1,CDC20,ZWINT,PCNA,CDK1,CDC45,TOP2A,H2AFX,TIMELESS,E2F8
GO:1901990	Regulation of mitotic cell cycle phase transition	47	416	0.61	1.53e-12	9606.ENSP00000166345,9606.ENSP00000209728,9606.ENSP00000216911,9606.ENSP00000244745,9606.ENSP00000247191,9606.ENSP00000256442,9606.ENSP00000257934,9606.ENSP00000261597,9606.ENSP00000265148,9606.ENSP00000265748,9606.ENSP00000270861,9606.ENSP00000275517,9606.ENSP00000287598,9606.ENSP00000296509,9606.ENSP00000297338,9606.ENSP00000300093,9606.ENSP00000300403,9606.ENSP00000301019,9606.ENSP00000301633,…	TRIP13,CDC6,AURKA,SOX4,DLGAP5,CCNB1,ESPL1,NDC80,CENPE,ANLN,PLK4,CDCA5,BUB1B,MAD2L1,RAD21,PLK1,TPX2,CDT1,BIRC5,BUB1,CDC25A,CLSPN,AURKB,GEN1,EZH2,CDC25C,E2F7,TUBB,E2F1,BLM,UBE2C,CENPF,DTL,NEK2,KIF14,TTK,ORC1,CDC20,RCC2,UBD,PCNA,HMMR,CDK1,CDC7,CDC45,CDKN2A,E2F8
GO:1901987	Regulation of cell cycle phase transition	49	452	0.59	1.65e-12	9606.ENSP00000166345,9606.ENSP00000209728,9606.ENSP00000216911,9606.ENSP00000244745,9606.ENSP00000247191,9606.ENSP00000256442,9606.ENSP00000257934,9606.ENSP00000261597,9606.ENSP00000265148,9606.ENSP00000265728,9606.ENSP00000265748,9606.ENSP00000270861,9606.ENSP00000275517,9606.ENSP00000287598,9606.ENSP00000296509,9606.ENSP00000297338,9606.ENSP00000300093,9606.ENSP00000300403,9606.ENSP00000301019,…	TRIP13,CDC6,AURKA,SOX4,DLGAP5,CCNB1,ESPL1,NDC80,CENPE,DBF4,ANLN,PLK4,CDCA5,BUB1B,MAD2L1,RAD21,PLK1,TPX2,CDT1,BIRC5,BUB1,CDC25A,CLSPN,AURKB,GEN1,EZH2,CDC25C,E2F7,TUBB,E2F1,BLM,UBE2C,CENPF,DTL,NEK2,KIF14,TTK,ORC1,CDC20,RCC2,UBD,PCNA,HMMR,CDK1,CDC7,CDC45,CDKN2A,E2F8,FAM83D
GO:0030071	Regulation of mitotic metaphase/anaphase transition	20	56	1.11	2.32e-12	9606.ENSP00000166345,9606.ENSP00000209728,9606.ENSP00000247191,9606.ENSP00000256442,9606.ENSP00000257934,9606.ENSP00000261597,9606.ENSP00000265148,9606.ENSP00000287598,9606.ENSP00000296509,9606.ENSP00000297338,9606.ENSP00000300093,9606.ENSP00000301019,9606.ENSP00000301633,9606.ENSP00000302530,9606.ENSP00000313950,9606.ENSP00000318977,9606.ENSP00000348838,9606.ENSP00000355922,9606.ENSP00000358813,…	TRIP13,CDC6,DLGAP5,CCNB1,ESPL1,NDC80,CENPE,BUB1B,MAD2L1,RAD21,PLK1,CDT1,BIRC5,BUB1,AURKB,GEN1,UBE2C,CENPF,TTK,CDC20
GO:0000082	G1/S transition of mitotic cell cycle	27	128	0.88	2.93e-12	9606.ENSP00000209728,9606.ENSP00000216122,9606.ENSP00000242208,9606.ENSP00000262105,9606.ENSP00000262643,9606.ENSP00000262904,9606.ENSP00000264156,9606.ENSP00000265056,9606.ENSP00000265728,9606.ENSP00000301019,9606.ENSP00000303706,9606.ENSP00000315644,9606.ENSP00000323246,9606.ENSP00000335357,9606.ENSP00000340691,9606.ENSP00000345571,9606.ENSP00000353770,9606.ENSP00000354451,9606.ENSP00000360623,…	CDC6,MCM5,INHBA,MCM4,CCNE1,E2F3,MCM6,MCM2,DBF4,CDT1,CDC25A,TYMS,E2F7,CDKN3,EIF4EBP1,E2F1,RRM2,IQGAP3,ORC1,RCC1,PCNA,CDC7,CDC45,MCM10,CDKN2A,CCNE2,MCM3
GO:0033044	Regulation of chromosome organization	43	359	0.64	3.49e-12	9606.ENSP00000166345,9606.ENSP00000209728,9606.ENSP00000244534,9606.ENSP00000244573,9606.ENSP00000247191,9606.ENSP00000256442,9606.ENSP00000257934,9606.ENSP00000261597,9606.ENSP00000265056,9606.ENSP00000265148,9606.ENSP00000275517,9606.ENSP00000280326,9606.ENSP00000287394,9606.ENSP00000287598,9606.ENSP00000295688,9606.ENSP00000296509,9606.ENSP00000297338,9606.ENSP00000300093,9606.ENSP00000301019,…	TRIP13,CDC6,HIST1H1D,HIST1H1A,DLGAP5,CCNB1,ESPL1,NDC80,MCM2,CENPE,CDCA5,CCT5,ATAD2,BUB1B,CCT3,MAD2L1,RAD21,PLK1,CDT1,BIRC5,BUB1,FEN1,HIST1H1E,RMI2,AURKB,GEN1,TACC3,PIF1,HIST1H1B,HIST1H1C,UBE2C,DNMT1,PARP1,CENPF,NEK2,MKI67,TTK,CDC20,PTTG1,HMGA1,CDC45,TOP2A,DDX11
GO:0033043	Regulation of organelle organization	88	1306	0.39	1.06e-11	9606.ENSP00000166345,9606.ENSP00000209728,9606.ENSP00000216341,9606.ENSP00000216911,9606.ENSP00000219150,9606.ENSP00000225655,9606.ENSP00000233143,9606.ENSP00000239940,9606.ENSP00000244534,9606.ENSP00000244573,9606.ENSP00000247191,9606.ENSP00000256442,9606.ENSP00000257934,9606.ENSP00000260731,9606.ENSP00000261597,9606.ENSP00000262300,9606.ENSP00000262428,9606.ENSP00000263181,9606.ENSP00000263867,…	TRIP13,CDC6,GZMB,AURKA,CORO1A,PFN1,TMSB10,PFN2,HIST1H1D,HIST1H1A,DLGAP5,CCNB1,ESPL1,KIF11,NDC80,PKMYT1,COTL1,KIF18A,CAPG,ICAM1,MCM2,CENPE,ANLN,PLK4,CDCA5,CCT5,ATAD2,BUB1B,CCT3,POC1A,MAD2L1,RAD21,PLK1,TPX2,CDT1,BIRC5,BUB1,RAC3,FEN1,HIST1H1E,RMI2,AURKB,GEN1,SKA3,CALR,CDC25C,SPAG5,PMAIP1,TACC3,PIF1,HIST1H1B,PLAUR,HIST1H1C,E2F1,UBE2C,DNMT1,IQGAP3,HORMAD1,PARP1,CENPF,NEK2,PFDN2,MKI67,S100A8,S100A9,TTK…
GO:0006974	Cellular response to dna damage stimulus	65	793	0.47	1.09e-11	9606.ENSP00000166345,9606.ENSP00000215754,9606.ENSP00000216117,9606.ENSP00000216122,9606.ENSP00000216911,9606.ENSP00000221486,9606.ENSP00000228843,9606.ENSP00000244745,9606.ENSP00000256442,9606.ENSP00000259008,9606.ENSP00000262105,9606.ENSP00000264156,9606.ENSP00000264233,9606.ENSP00000264596,9606.ENSP00000265056,9606.ENSP00000267953,9606.ENSP00000275517,9606.ENSP00000296503,9606.ENSP00000297338,…	TRIP13,MIF,HMOX1,MCM5,AURKA,RNASEH2A,RAD51AP1,SOX4,CCNB1,BRIP1,MCM4,MCM6,POLQ,NEIL3,MCM2,BCL2A1,CDCA5,HMGB2,RAD21,KIAA0101,PLK1,CHAF1A,CTLA4,FEN1,RMI2,FANCI,CLSPN,GEN1,CDC25C,E2F7,PMAIP1,PIF1,FOXM1,E2F1,HIST1H4J,BLM,WDHD1,EXO1,HIST3H2A,PARP1,DTL,UBE2T,RAD54L,HIST1H4H,HIST1H4C,PCNA,ISG15,RAD51,FANCA,RFC4,PTTG1,CDK1,FANCB,TONSL,CDC7,HMGA1,CDC45,TOP2A,MCM10,H2AFX,DDX11,TIMELESS,MCM3,E2F8,RECQL4
GO:0006281	DNA repair	50	522	0.54	6.07e-11	9606.ENSP00000166345,9606.ENSP00000216122,9606.ENSP00000221486,9606.ENSP00000228843,9606.ENSP00000259008,9606.ENSP00000262105,9606.ENSP00000264156,9606.ENSP00000264233,9606.ENSP00000264596,9606.ENSP00000265056,9606.ENSP00000275517,9606.ENSP00000296503,9606.ENSP00000297338,9606.ENSP00000300035,9606.ENSP00000301280,9606.ENSP00000305480,9606.ENSP00000310356,9606.ENSP00000310842,9606.ENSP00000312995,…	TRIP13,MCM5,RNASEH2A,RAD51AP1,BRIP1,MCM4,MCM6,POLQ,NEIL3,MCM2,CDCA5,HMGB2,RAD21,KIAA0101,CHAF1A,FEN1,RMI2,FANCI,CLSPN,GEN1,PIF1,FOXM1,HIST1H4J,BLM,WDHD1,EXO1,HIST3H2A,PARP1,DTL,UBE2T,RAD54L,HIST1H4H,HIST1H4C,PCNA,ISG15,RAD51,FANCA,RFC4,PTTG1,CDK1,FANCB,TONSL,CDC7,HMGA1,CDC45,H2AFX,DDX11,TIMELESS,MCM3,RECQL4
GO:1903046	Meiotic cell cycle process	28	165	0.79	9.72e-11	9606.ENSP00000166345,9606.ENSP00000216911,9606.ENSP00000240423,9606.ENSP00000240488,9606.ENSP00000257934,9606.ENSP00000259008,9606.ENSP00000262643,9606.ENSP00000263181,9606.ENSP00000263753,9606.ENSP00000271452,9606.ENSP00000287598,9606.ENSP00000297338,9606.ENSP00000300093,9606.ENSP00000302530,9606.ENSP00000325017,9606.ENSP00000349961,9606.ENSP00000355167,9606.ENSP00000356379,9606.ENSP00000358813,…	TRIP13,AURKA,NCAPH,MND1,ESPL1,BRIP1,CCNE1,KIF18A,SGOL1,NUF2,BUB1B,RAD21,PLK1,BUB1,NCAPD2,SMC4,HORMAD1,ASPM,TTK,RAD54L,CKS2,RAD51,FANCA,PTTG1,INCENP,TOP2A,CCNE2,MYBL1
GO:0140013	Meiotic nuclear division	27	152	0.81	9.76e-11	9606.ENSP00000166345,9606.ENSP00000216911,9606.ENSP00000240423,9606.ENSP00000240488,9606.ENSP00000257934,9606.ENSP00000259008,9606.ENSP00000262643,9606.ENSP00000263181,9606.ENSP00000263753,9606.ENSP00000271452,9606.ENSP00000287598,9606.ENSP00000297338,9606.ENSP00000300093,9606.ENSP00000302530,9606.ENSP00000349961,9606.ENSP00000355167,9606.ENSP00000356379,9606.ENSP00000358813,9606.ENSP00000361043,…	TRIP13,AURKA,NCAPH,MND1,ESPL1,BRIP1,CCNE1,KIF18A,SGOL1,NUF2,BUB1B,RAD21,PLK1,BUB1,SMC4,HORMAD1,ASPM,TTK,RAD54L,CKS2,RAD51,FANCA,PTTG1,INCENP,TOP2A,CCNE2,MYBL1
GO:0043933	Protein-containing complex subunit organization	95	1539	0.35	1.11e-10	9606.ENSP00000215754,9606.ENSP00000216122,9606.ENSP00000244534,9606.ENSP00000244573,9606.ENSP00000254508,9606.ENSP00000256442,9606.ENSP00000260102,9606.ENSP00000262105,9606.ENSP00000263181,9606.ENSP00000263382,9606.ENSP00000263867,9606.ENSP00000264156,9606.ENSP00000264233,9606.ENSP00000264552,9606.ENSP00000265056,9606.ENSP00000265148,9606.ENSP00000265748,9606.ENSP00000272348,9606.ENSP00000274793,…	MIF,MCM5,HIST1H1D,HIST1H1A,NUP210,CCNB1,MRPL15,MCM4,KIF18A,ASF1B,CAPG,MCM6,POLQ,UBE2S,MCM2,CENPE,ANLN,SNRPG,PLA2G7,NDUFB9,CENPU,HIST1H2BD,CCT3,HMGB2,TPX2,CDT1,CHAF1A,TK1,MRPL13,HIST1H1E,CALR,HIST1H2BC,P4HB,HIST1H1B,HIST2H3D,SHMT2,CASC5,CENPA,HIST1H1C,C20orf24,FN1,HIST1H4J,BLM,UBE2C,HIST1H2BK,HIST1H3J,RRM2,COA6,HIST3H2A,PARP1,EPRS,CENPF,CENPW,HIST2H2BE,HIST2H3C,GBP5,KCNG1,MRPL14,KIF2C,SRPK1,HIST1H…
GO:0006325	Chromatin organization	59	713	0.48	1.17e-10	9606.ENSP00000216911,9606.ENSP00000244534,9606.ENSP00000244573,9606.ENSP00000256442,9606.ENSP00000263382,9606.ENSP00000265056,9606.ENSP00000274026,9606.ENSP00000281453,9606.ENSP00000287394,9606.ENSP00000289316,9606.ENSP00000296417,9606.ENSP00000296503,9606.ENSP00000301280,9606.ENSP00000307705,9606.ENSP00000308750,9606.ENSP00000313950,9606.ENSP00000320147,9606.ENSP00000321744,9606.ENSP00000330074,…	AURKA,HIST1H1D,HIST1H1A,CCNB1,ASF1B,MCM2,CCNA2,CENPU,ATAD2,HIST1H2BD,H2AFZ,HMGB2,CHAF1A,HIST1H1E,CBX2,AURKB,EZH2,HIST1H2BC,HIST1H1B,HIST2H2AB,HIST2H3D,CASC5,CENPA,CDCA4,HIST1H1C,HIST1H2AD,HIST1H4J,HIST1H2BK,HIST1H2AI,HIST1H2AG,HIST1H3J,DNMT1,HIST3H2A,CENPW,HIST2H2BE,HIST2H3C,HIST2H2AA,HMGB3,SRPK1,HIST1H2BL,HIST1H4H,HIST1H3D,HIST1H4C,CENPN,HELLS,INCENP,CDK1,HIST2H3A,SMARCA4,HMGA1,HJURP,CDKN2A,H2AF…
GO:0051321	Meiotic cell cycle	31	220	0.71	3.99e-10	9606.ENSP00000166345,9606.ENSP00000216911,9606.ENSP00000240423,9606.ENSP00000240488,9606.ENSP00000257934,9606.ENSP00000259008,9606.ENSP00000262643,9606.ENSP00000263181,9606.ENSP00000263753,9606.ENSP00000271452,9606.ENSP00000287598,9606.ENSP00000297338,9606.ENSP00000300093,9606.ENSP00000302530,9606.ENSP00000325017,9606.ENSP00000349961,9606.ENSP00000355167,9606.ENSP00000355506,9606.ENSP00000355966,…	TRIP13,AURKA,NCAPH,MND1,ESPL1,BRIP1,CCNE1,KIF18A,SGOL1,NUF2,BUB1B,RAD21,PLK1,BUB1,NCAPD2,SMC4,HORMAD1,EXO1,NEK2,ASPM,TTK,RAD54L,CKS2,RAD51,FANCA,PTTG1,INCENP,TOP2A,CCNE2,MYBL1,H2AFX
GO:2001251	Negative regulation of chromosome organization	25	137	0.82	4.11e-10	9606.ENSP00000166345,9606.ENSP00000244534,9606.ENSP00000244573,9606.ENSP00000257934,9606.ENSP00000265056,9606.ENSP00000287394,9606.ENSP00000287598,9606.ENSP00000296509,9606.ENSP00000297338,9606.ENSP00000300093,9606.ENSP00000301633,9606.ENSP00000302530,9606.ENSP00000307705,9606.ENSP00000313950,9606.ENSP00000328174,9606.ENSP00000330074,9606.ENSP00000339566,9606.ENSP00000352516,9606.ENSP00000355759,…	TRIP13,HIST1H1D,HIST1H1A,ESPL1,MCM2,ATAD2,BUB1B,MAD2L1,RAD21,PLK1,BIRC5,BUB1,HIST1H1E,AURKB,PIF1,HIST1H1B,HIST1H1C,DNMT1,PARP1,CENPF,TTK,CDC20,PTTG1,HMGA1,TOP2A
GO:0030261	Chromosome condensation	16	42	1.14	4.29e-10	9606.ENSP00000240423,9606.ENSP00000244534,9606.ENSP00000244573,9606.ENSP00000251496,9606.ENSP00000256442,9606.ENSP00000275517,9606.ENSP00000307705,9606.ENSP00000325017,9606.ENSP00000330074,9606.ENSP00000339566,9606.ENSP00000349961,9606.ENSP00000378295,9606.ENSP00000378699,9606.ENSP00000387007,9606.ENSP00000411532,9606.ENSP00000453403	NCAPH,HIST1H1D,HIST1H1A,NCAPG,CCNB1,CDCA5,HIST1H1E,NCAPD2,HIST1H1B,HIST1H1C,SMC4,INCENP,CDK1,NCAPG2,TOP2A,NUSAP1
GO:0006955	Immune response	95	1588	0.34	5.7e-10	9606.ENSP00000215754,9606.ENSP00000216341,9606.ENSP00000219150,9606.ENSP00000228928,9606.ENSP00000229239,9606.ENSP00000236147,9606.ENSP00000236671,9606.ENSP00000250092,9606.ENSP00000256412,9606.ENSP00000257570,9606.ENSP00000260118,9606.ENSP00000261267,9606.ENSP00000262428,9606.ENSP00000262629,9606.ENSP00000262746,9606.ENSP00000264246,9606.ENSP00000264832,9606.ENSP00000269389,9606.ENSP00000271638,…	MIF,GZMB,CORO1A,OAS3,GAPDH,SELL,CTSD,CD68,ADAMDEC1,OASL,GGH,LYZ,COTL1,TYROBP,PRDX1,CD80,ICAM1,SECTM1,S100A11,CXCL13,FCER1G,CSTB,S100P,HMGB2,KRT16,CLEC7A,CTLA4,CXCL10,CXCL8,ISG20,CXCL11,PPP1R14B,TRIM59,PKM,HIST1H2BC,APOBEC3B,CD86,SHMT2,TUBB,PLAUR,OAS2,IFI6,QPCT,CTSB,TAP1,HIST1H2BK,CCL20,STAT1,PNP,CXCL9,ILF2,EXO1,EPRS,RGS1,FCGR3A,S100A7,S100A8,S100A9,CTSS,HIST2H2BE,FCGR1A,IRAK1,HMGB3,GBP5,IFI44L,MM…
GO:0007010	Cytoskeleton organization	76	1126	0.39	5.99e-10	9606.ENSP00000216911,9606.ENSP00000217026,9606.ENSP00000219150,9606.ENSP00000225655,9606.ENSP00000229239,9606.ENSP00000233143,9606.ENSP00000239940,9606.ENSP00000252252,9606.ENSP00000256442,9606.ENSP00000257934,9606.ENSP00000260363,9606.ENSP00000260731,9606.ENSP00000261597,9606.ENSP00000262629,9606.ENSP00000263181,9606.ENSP00000263753,9606.ENSP00000263867,9606.ENSP00000265148,9606.ENSP00000265748,…	AURKA,MYBL2,CORO1A,PFN1,GAPDH,TMSB10,PFN2,KRT6B,CCNB1,ESPL1,KIF23,KIF11,NDC80,TYROBP,KIF18A,SGOL1,CAPG,CENPE,ANLN,PLK4,NUF2,THY1,CXADR,POC1A,MAD2L1,KIAA0101,PLK1,TPX2,TUBA1C,EVPL,BIRC5,KRT16,RAC3,AURKB,CALR,SPAG5,TACC3,TUBA1B,CENPA,TUBB,NEK2,ASPM,CENPW,TPM3,TTK,PSRC1,STIL,KIF2C,CDC20,RCC1,KIF4A,KRT6A,CALML5,FAM83H,TTLL4,CIT,LLGL2,PRC1,INCENP,KIF20A,CDK1,LCP1,DIAPH3,WDR62,SAPCD2,KIFC1,RACGAP1,STMN…
GO:0065003	Protein-containing complex assembly	83	1293	0.37	5.99e-10	9606.ENSP00000215754,9606.ENSP00000216122,9606.ENSP00000244534,9606.ENSP00000244573,9606.ENSP00000254508,9606.ENSP00000256442,9606.ENSP00000262105,9606.ENSP00000263382,9606.ENSP00000263867,9606.ENSP00000264156,9606.ENSP00000264233,9606.ENSP00000264552,9606.ENSP00000265056,9606.ENSP00000265148,9606.ENSP00000265748,9606.ENSP00000272348,9606.ENSP00000276689,9606.ENSP00000281453,9606.ENSP00000289316,…	MIF,MCM5,HIST1H1D,HIST1H1A,NUP210,CCNB1,MCM4,ASF1B,CAPG,MCM6,POLQ,UBE2S,MCM2,CENPE,ANLN,SNRPG,NDUFB9,CENPU,HIST1H2BD,CCT3,HMGB2,TPX2,CDT1,CHAF1A,TK1,HIST1H1E,CALR,HIST1H2BC,P4HB,HIST1H1B,HIST2H3D,SHMT2,CASC5,CENPA,HIST1H1C,C20orf24,FN1,HIST1H4J,BLM,UBE2C,HIST1H2BK,HIST1H3J,RRM2,COA6,PARP1,EPRS,CENPF,CENPW,HIST2H2BE,HIST2H3C,GBP5,KCNG1,SRPK1,HIST1H2BL,HIST1H4H,HIST1H3D,HIST1H4C,RAD51,FANCA,CENPN,H…
GO:0010948	Negative regulation of cell cycle process	37	328	0.61	1.06e-09	9606.ENSP00000166345,9606.ENSP00000209728,9606.ENSP00000215754,9606.ENSP00000216911,9606.ENSP00000244745,9606.ENSP00000256442,9606.ENSP00000257934,9606.ENSP00000287598,9606.ENSP00000296509,9606.ENSP00000297338,9606.ENSP00000300093,9606.ENSP00000301019,9606.ENSP00000301633,9606.ENSP00000302530,9606.ENSP00000312995,9606.ENSP00000313950,9606.ENSP00000320147,9606.ENSP00000320866,9606.ENSP00000321656,…	TRIP13,CDC6,MIF,AURKA,SOX4,CCNB1,ESPL1,BUB1B,MAD2L1,RAD21,PLK1,CDT1,BIRC5,BUB1,CLSPN,AURKB,EZH2,CALR,CDC25C,E2F7,E2F1,BLM,RRM2,HORMAD1,CENPF,DTL,NEK2,TTK,ORC1,CDC20,PCNA,RAD51,PTTG1,CDK1,CDC7,CDKN2A,E2F8
GO:0022607	Cellular component assembly	123	2359	0.28	1.33e-09	9606.ENSP00000166345,9606.ENSP00000215754,9606.ENSP00000216122,9606.ENSP00000216911,9606.ENSP00000217026,9606.ENSP00000219150,9606.ENSP00000244534,9606.ENSP00000244573,9606.ENSP00000254508,9606.ENSP00000256442,9606.ENSP00000259008,9606.ENSP00000260363,9606.ENSP00000260731,9606.ENSP00000262105,9606.ENSP00000263382,9606.ENSP00000263867,9606.ENSP00000264156,9606.ENSP00000264233,9606.ENSP00000264552,…	TRIP13,MIF,MCM5,AURKA,MYBL2,CORO1A,HIST1H1D,HIST1H1A,NUP210,CCNB1,BRIP1,KIF23,KIF11,MCM4,ASF1B,CAPG,MCM6,POLQ,UBE2S,MCM2,CENPE,ANLN,SQLE,PLK4,SNRPG,NDUFB9,CENPU,THY1,HIST1H2BD,CCT3,POC1A,HMGB2,PLK1,TPX2,CDT1,CHAF1A,BIRC5,TK1,RAC3,BOLA2B,HIST1H1E,AURKB,CALR,HIST1H2BC,P4HB,HIST1H1B,BOLA2,HIST2H3D,SHMT2,CDKN3,CASC5,CENPA,TUBB,HIST1H1C,C20orf24,FN1,HIST1H4J,BLM,UBE2C,HIST1H2BK,HIST1H3J,RRM2,HORMAD1,E…
GO:0019221	Cytokine-mediated signaling pathway	55	678	0.47	1.41e-09	9606.ENSP00000215754,9606.ENSP00000216117,9606.ENSP00000228928,9606.ENSP00000257570,9606.ENSP00000261366,9606.ENSP00000262345,9606.ENSP00000264246,9606.ENSP00000264832,9606.ENSP00000286758,9606.ENSP00000289902,9606.ENSP00000301633,9606.ENSP00000303634,9606.ENSP00000305651,9606.ENSP00000306512,9606.ENSP00000306565,9606.ENSP00000306752,9606.ENSP00000306884,9606.ENSP00000322788,9606.ENSP00000326737,…	MIF,HMOX1,OAS3,OASL,LMNB1,IL12RB2,CD80,ICAM1,CXCL13,FCER1G,BIRC5,LRP8,CXCL10,CXCL8,ISG20,BOLA2B,CXCL11,MMP1,TNFRSF12A,P4HB,BOLA2,CD86,HIST2H3D,OAS2,IFI6,FN1,CCL20,HIST1H3J,STAT1,CXCL9,HIST2H3C,FCGR1A,IRAK1,MMP9,EDN2,LCN2,HLA-DQA2,HLA-DQB1,HLA-C,HIST1H3D,ISG15,FOXC1,SDC1,RSAD2,HLA-DRA,LCP1,IFI30,HIST2H3A,CXCR4,SMARCA4,HLA-B,LTB,IL32,CFL1,ITGAX
GO:0007017	Microtubule-based process	57	727	0.45	1.97e-09	9606.ENSP00000216911,9606.ENSP00000217026,9606.ENSP00000229239,9606.ENSP00000247191,9606.ENSP00000256442,9606.ENSP00000257934,9606.ENSP00000260363,9606.ENSP00000260731,9606.ENSP00000261597,9606.ENSP00000263181,9606.ENSP00000263753,9606.ENSP00000265148,9606.ENSP00000270861,9606.ENSP00000271452,9606.ENSP00000284440,9606.ENSP00000296484,9606.ENSP00000296509,9606.ENSP00000300035,9606.ENSP00000300093,…	AURKA,MYBL2,GAPDH,DLGAP5,CCNB1,ESPL1,KIF23,KIF11,NDC80,KIF18A,SGOL1,CENPE,PLK4,NUF2,UCHL1,POC1A,MAD2L1,KIAA0101,PLK1,TPX2,TUBA1C,BIRC5,AURKB,SPAG5,KIF15,TACC3,TUBA1B,CENPA,TUBB,NEK2,KIF14,ASPM,CENPW,TTK,PSRC1,STIL,KIF2C,CDC20,RCC1,KIF4A,CALML5,TTLL4,LLGL2,PRC1,INCENP,KIF20A,CDK1,WDR62,SAPCD2,KIFC1,RACGAP1,STMN1,KIF1A,GAS2L3,ENSG00000258947,NUSAP1,KIF18B
GO:0048523	Negative regulation of cellular process	206	4874	0.19	2.96e-09	9606.ENSP00000166345,9606.ENSP00000209728,9606.ENSP00000215743,9606.ENSP00000215754,9606.ENSP00000216117,9606.ENSP00000216127,9606.ENSP00000216341,9606.ENSP00000216911,9606.ENSP00000217086,9606.ENSP00000218230,9606.ENSP00000219150,9606.ENSP00000222271,9606.ENSP00000225655,9606.ENSP00000225964,9606.ENSP00000226279,9606.ENSP00000229239,9606.ENSP00000230321,9606.ENSP00000233143,9606.ENSP00000239940,…	TRIP13,CDC6,MMP11,MIF,HMOX1,RASD2,GZMB,AURKA,SALL4,PCSK1N,CORO1A,COMP,PFN1,COL1A1,CD38,GAPDH,MDFI,TMSB10,PFN2,INHBA,HIST1H1D,HIST1H1A,SOX4,WISP1,ADAMDEC1,CCNB1,ESPL1,IGF2BP3,BRIP1,SULF1,PKMYT1,TYROBP,CCNE1,E2F3,EPCAM,CAPG,POLQ,CD80,ICAM1,MCM2,PITX1,TFEC,GAL,BCL2A1,S100A11,HES6,THY1,UCHL1,CXADR,SAMSN1,CXCL13,ATAD2,BUB1B,SLAMF8,FCER1G,CSTB,EN1,H2AFZ,HMGB2,MAD2L1,RAD21,A2ML1,PLK1,TPX2,CDT1,BIRC5,KRT…
GO:0045786	Negative regulation of cell cycle	49	571	0.49	3.35e-09	9606.ENSP00000166345,9606.ENSP00000209728,9606.ENSP00000215754,9606.ENSP00000216911,9606.ENSP00000242208,9606.ENSP00000244745,9606.ENSP00000256442,9606.ENSP00000257934,9606.ENSP00000259008,9606.ENSP00000287598,9606.ENSP00000296509,9606.ENSP00000297338,9606.ENSP00000300093,9606.ENSP00000301019,9606.ENSP00000301633,9606.ENSP00000302530,9606.ENSP00000306512,9606.ENSP00000312995,9606.ENSP00000313950,…	TRIP13,CDC6,MIF,AURKA,INHBA,SOX4,CCNB1,ESPL1,BRIP1,BUB1B,MAD2L1,RAD21,PLK1,CDT1,BIRC5,BUB1,CXCL8,CLSPN,AURKB,EZH2,CALR,CDC25C,SOX11,E2F7,CDKN3,E2F1,BLM,RRM2,HORMAD1,CENPF,DTL,NEK2,TTK,ORC1,CDC20,ZWINT,PCNA,FOXC1,RAD51,PTTG1,CDK1,RUNX3,CDC7,CDC45,TOP2A,CDKN2A,H2AFX,TIMELESS,E2F8
GO:0034097	Response to cytokine	73	1101	0.38	3.39e-09	9606.ENSP00000215754,9606.ENSP00000216117,9606.ENSP00000217026,9606.ENSP00000219150,9606.ENSP00000225964,9606.ENSP00000226279,9606.ENSP00000228928,9606.ENSP00000229239,9606.ENSP00000257570,9606.ENSP00000260102,9606.ENSP00000261366,9606.ENSP00000262345,9606.ENSP00000264246,9606.ENSP00000264832,9606.ENSP00000265056,9606.ENSP00000286758,9606.ENSP00000289902,9606.ENSP00000294507,9606.ENSP00000301633,…	MIF,HMOX1,MYBL2,CORO1A,COL1A1,CD38,OAS3,GAPDH,OASL,MRPL15,LMNB1,IL12RB2,CD80,ICAM1,MCM2,CXCL13,FCER1G,LAPTM5,BIRC5,LRP8,CXCL10,CXCL8,ISG20,BOLA2B,CXCL11,TYMS,MMP1,TNFRSF12A,P4HB,BOLA2,CD86,HIST2H3D,SHMT2,TUBA1B,OAS2,IFI6,FN1,CCL20,HIST1H3J,STAT1,CXCL9,EPRS,HDGF,HIST2H3C,FCGR1A,IRAK1,GBP5,SLC25A5,MMP9,EDN2,LCN2,SPOCK2,HLA-DQA2,HLA-DQB1,HLA-C,UBD,HIST1H3D,ISG15,POSTN,FOXC1,SDC1,RSAD2,HLA-DRA,LCP1,I…
GO:0051128	Regulation of cellular component organization	123	2402	0.27	3.89e-09	9606.ENSP00000166345,9606.ENSP00000209728,9606.ENSP00000216341,9606.ENSP00000216911,9606.ENSP00000219150,9606.ENSP00000225655,9606.ENSP00000226279,9606.ENSP00000233143,9606.ENSP00000239940,9606.ENSP00000242208,9606.ENSP00000244534,9606.ENSP00000244573,9606.ENSP00000247191,9606.ENSP00000252599,9606.ENSP00000256442,9606.ENSP00000257934,9606.ENSP00000260731,9606.ENSP00000261597,9606.ENSP00000262300,…	TRIP13,CDC6,GZMB,AURKA,CORO1A,PFN1,CD38,TMSB10,PFN2,INHBA,HIST1H1D,HIST1H1A,DLGAP5,COLGALT1,CCNB1,ESPL1,KIF11,NDC80,PKMYT1,COTL1,TYROBP,KIF18A,CAPG,ICAM1,MCM2,CENPE,ANLN,PLK4,CDCA5,CCT5,THY1,CXCL13,ATAD2,BUB1B,CCT3,POC1A,MAD2L1,RAD21,PLK1,TPX2,CDT1,BIRC5,BUB1,CLEC7A,LRP8,RAC3,FEN1,CXCL10,HIST1H1E,RMI2,AURKB,GEN1,SKA3,EZH2,CALR,CDC25C,MMP1,SPAG5,PMAIP1,TACC3,TNFRSF12A,PIF1,HIST1H1B,EPHB3,NME1,TUBB…
GO:0071345	Cellular response to cytokine stimulus	69	1013	0.39	4.17e-09	9606.ENSP00000215754,9606.ENSP00000216117,9606.ENSP00000217026,9606.ENSP00000219150,9606.ENSP00000225964,9606.ENSP00000228928,9606.ENSP00000229239,9606.ENSP00000257570,9606.ENSP00000260102,9606.ENSP00000261366,9606.ENSP00000262345,9606.ENSP00000264246,9606.ENSP00000264832,9606.ENSP00000265056,9606.ENSP00000286758,9606.ENSP00000289902,9606.ENSP00000294507,9606.ENSP00000301633,9606.ENSP00000303634,…	MIF,HMOX1,MYBL2,CORO1A,COL1A1,OAS3,GAPDH,OASL,MRPL15,LMNB1,IL12RB2,CD80,ICAM1,MCM2,CXCL13,FCER1G,LAPTM5,BIRC5,LRP8,CXCL10,CXCL8,ISG20,BOLA2B,CXCL11,MMP1,TNFRSF12A,P4HB,BOLA2,CD86,HIST2H3D,TUBA1B,OAS2,IFI6,FN1,CCL20,HIST1H3J,STAT1,CXCL9,EPRS,HDGF,HIST2H3C,FCGR1A,IRAK1,GBP5,SLC25A5,MMP9,EDN2,LCN2,SPOCK2,HLA-DQA2,HLA-DQB1,HLA-C,HIST1H3D,ISG15,POSTN,FOXC1,SDC1,RSAD2,HLA-DRA,LCP1,IFI30,HIST2H3A,CXCR4,…
GO:0007093	Mitotic cell cycle checkpoint	25	156	0.76	4.18e-09	9606.ENSP00000166345,9606.ENSP00000209728,9606.ENSP00000216911,9606.ENSP00000244745,9606.ENSP00000256442,9606.ENSP00000287598,9606.ENSP00000296509,9606.ENSP00000300093,9606.ENSP00000301633,9606.ENSP00000302530,9606.ENSP00000312995,9606.ENSP00000313950,9606.ENSP00000321656,9606.ENSP00000323246,9606.ENSP00000345571,9606.ENSP00000347232,9606.ENSP00000355922,9606.ENSP00000358813,9606.ENSP00000360623,…	TRIP13,CDC6,AURKA,SOX4,CCNB1,BUB1B,MAD2L1,PLK1,BIRC5,BUB1,CLSPN,AURKB,CDC25C,E2F7,E2F1,BLM,CENPF,TTK,ORC1,CDC20,ZWINT,PCNA,CDK1,TOP2A,E2F8
GO:0050794	Regulation of cellular process	377	10932	0.1	5.58e-09	9606.ENSP00000166345,9606.ENSP00000209728,9606.ENSP00000215743,9606.ENSP00000215754,9606.ENSP00000215794,9606.ENSP00000216117,9606.ENSP00000216127,9606.ENSP00000216341,9606.ENSP00000216911,9606.ENSP00000217026,9606.ENSP00000217086,9606.ENSP00000218230,9606.ENSP00000219150,9606.ENSP00000222271,9606.ENSP00000225655,9606.ENSP00000225964,9606.ENSP00000226279,9606.ENSP00000226284,9606.ENSP00000228843,…	TRIP13,CDC6,MMP11,MIF,USP18,HMOX1,RASD2,GZMB,AURKA,MYBL2,SALL4,PCSK1N,CORO1A,COMP,PFN1,COL1A1,CD38,IBSP,RAD51AP1,OAS3,GAPDH,MDFI,TMSB10,HSPE1,CTSD,PFN2,INHBA,HIST1H1D,HIST1H1A,SOX4,DLGAP5,SDF2L1,WISP1,COLGALT1,NUP210,ADAMDEC1,CCNB1,ADAM19,OASL,ESPL1,IGF2BP3,BRIP1,SULF1,KIF23,KIF11,LMNB1,NDC80,CDK2AP1,PKMYT1,IL12RB2,COTL1,TYROBP,CCNE1,PRDX1,E2F3,KIF18A,EPCAM,CAPG,NMU,POLQ,CD80,UBE2S,ICAM1,DEPDC1B,…
GO:0006310	DNA recombination	29	219	0.68	6.52e-09	9606.ENSP00000166345,9606.ENSP00000216122,9606.ENSP00000228843,9606.ENSP00000240488,9606.ENSP00000259008,9606.ENSP00000262105,9606.ENSP00000264156,9606.ENSP00000264233,9606.ENSP00000265056,9606.ENSP00000296503,9606.ENSP00000297338,9606.ENSP00000305480,9606.ENSP00000318977,9606.ENSP00000328174,9606.ENSP00000347232,9606.ENSP00000355506,9606.ENSP00000355759,9606.ENSP00000359393,9606.ENSP00000361043,…	TRIP13,MCM5,RAD51AP1,MND1,BRIP1,MCM4,MCM6,POLQ,MCM2,HMGB2,RAD21,FEN1,GEN1,PIF1,BLM,EXO1,PARP1,HMGB3,RAD54L,RAD51,FANCB,TONSL,CDC7,CDC45,TOP2A,PGBD5,H2AFX,MCM3,RECQL4
GO:0050896	Response to stimulus	298	8046	0.13	9.67e-09	9606.ENSP00000166345,9606.ENSP00000209728,9606.ENSP00000215754,9606.ENSP00000216117,9606.ENSP00000216122,9606.ENSP00000216127,9606.ENSP00000216341,9606.ENSP00000216911,9606.ENSP00000217026,9606.ENSP00000218230,9606.ENSP00000219150,9606.ENSP00000221486,9606.ENSP00000222271,9606.ENSP00000225655,9606.ENSP00000225964,9606.ENSP00000226279,9606.ENSP00000226284,9606.ENSP00000228843,9606.ENSP00000228928,…	TRIP13,CDC6,MIF,HMOX1,MCM5,RASD2,GZMB,AURKA,MYBL2,PCSK1N,CORO1A,RNASEH2A,COMP,PFN1,COL1A1,CD38,IBSP,RAD51AP1,OAS3,GAPDH,HSPE1,SELL,CTSD,INHBA,SOX4,DLGAP5,SDF2L1,CD68,WISP1,ADAMDEC1,CCNB1,CMPK2,OASL,BRIP1,CLPS,MRPL15,GGH,SULF1,MMP7,MMP13,LYZ,LMNB1,MCM4,IL12RB2,COTL1,TYROBP,CCNE1,PRDX1,KIF18A,EPCAM,MCM6,NMU,POLQ,CD80,NEIL3,ICAM1,DEPDC1B,MCM2,TFEC,GAL,SQLE,MTFP1,ERP27,ARNTL2,BCL2A1,SECTM1,S100A11,CC…
GO:0044419	Interspecies interaction between organisms	103	1899	0.29	1.16e-08	9606.ENSP00000215754,9606.ENSP00000216341,9606.ENSP00000219150,9606.ENSP00000228928,9606.ENSP00000229239,9606.ENSP00000250092,9606.ENSP00000254508,9606.ENSP00000256722,9606.ENSP00000257570,9606.ENSP00000259938,9606.ENSP00000261267,9606.ENSP00000262345,9606.ENSP00000262428,9606.ENSP00000262629,9606.ENSP00000262746,9606.ENSP00000264246,9606.ENSP00000264832,9606.ENSP00000274026,9606.ENSP00000276708,…	MIF,GZMB,CORO1A,OAS3,GAPDH,CD68,NUP210,CMPK2,OASL,CLPS,LYZ,IL12RB2,COTL1,TYROBP,PRDX1,CD80,ICAM1,CCNA2,GSDMC,CCT5,CENPU,CXADR,CXCL13,SLAMF8,FCER1G,HMGB2,KRT16,BUB1,CLEC7A,CXCL10,CXCL8,ISG20,CXCL11,PPP1R14B,TRIM59,CDC25C,HIST1H2BC,MMP1,PMAIP1,APOBEC3B,CD86,SHMT2,CENPA,TUBB,C15orf48,OAS2,IFI6,E2F1,CTSB,TAP1,FN1,HIST1H2BK,CCL20,STAT1,CXCL9,EPRS,RGS1,PVRL4,S100A7,S100A8,S100A9,HIST2H2BE,FCGR1A,IRAK1,…
GO:0034622	Cellular protein-containing complex assembly	59	816	0.42	1.49e-08	9606.ENSP00000216122,9606.ENSP00000244534,9606.ENSP00000244573,9606.ENSP00000262105,9606.ENSP00000263382,9606.ENSP00000264156,9606.ENSP00000264552,9606.ENSP00000265056,9606.ENSP00000265148,9606.ENSP00000265748,9606.ENSP00000272348,9606.ENSP00000276689,9606.ENSP00000281453,9606.ENSP00000289316,9606.ENSP00000296503,9606.ENSP00000300403,9606.ENSP00000301019,9606.ENSP00000301280,9606.ENSP00000307705,…	MCM5,HIST1H1D,HIST1H1A,MCM4,ASF1B,MCM6,UBE2S,MCM2,CENPE,ANLN,SNRPG,NDUFB9,CENPU,HIST1H2BD,HMGB2,TPX2,CDT1,CHAF1A,HIST1H1E,CALR,HIST1H2BC,HIST1H1B,HIST2H3D,CASC5,CENPA,HIST1H1C,C20orf24,HIST1H4J,UBE2C,HIST1H2BK,HIST1H3J,COA6,PARP1,CENPF,CENPW,HIST2H2BE,HIST2H3C,SRPK1,HIST1H2BL,HIST1H4H,HIST1H3D,HIST1H4C,RAD51,CENPN,HELLS,HLA-DRA,DIAPH3,HIST2H3A,SMARCA4,CDC45,HJURP,H2AFX,HIST2H2BF,LSM4,HIST1H2BJ,GR…
GO:0048519	Negative regulation of biological process	219	5389	0.17	1.54e-08	9606.ENSP00000166345,9606.ENSP00000209728,9606.ENSP00000215743,9606.ENSP00000215754,9606.ENSP00000216117,9606.ENSP00000216127,9606.ENSP00000216341,9606.ENSP00000216911,9606.ENSP00000217086,9606.ENSP00000218230,9606.ENSP00000219150,9606.ENSP00000222271,9606.ENSP00000225655,9606.ENSP00000225964,9606.ENSP00000226279,9606.ENSP00000228928,9606.ENSP00000229239,9606.ENSP00000230321,9606.ENSP00000233143,…	TRIP13,CDC6,MMP11,MIF,HMOX1,RASD2,GZMB,AURKA,SALL4,PCSK1N,CORO1A,COMP,PFN1,COL1A1,CD38,OAS3,GAPDH,MDFI,TMSB10,PFN2,INHBA,HIST1H1D,HIST1H1A,SOX4,CD68,WISP1,ADAMDEC1,CCNB1,OASL,ESPL1,IGF2BP3,BRIP1,SULF1,PKMYT1,TYROBP,CCNE1,E2F3,EPCAM,CAPG,NMU,POLQ,CD80,ICAM1,MCM2,PITX1,TFEC,GAL,BCL2A1,S100A11,HES6,NFKBIE,THY1,UCHL1,CXADR,SAMSN1,CXCL13,ATAD2,BUB1B,SLAMF8,FCER1G,CSTB,EN1,H2AFZ,HMGB2,MAD2L1,RAD21,A2ML…
GO:0033046	Negative regulation of sister chromatid segregation	13	32	1.17	2.17e-08	9606.ENSP00000166345,9606.ENSP00000257934,9606.ENSP00000287598,9606.ENSP00000296509,9606.ENSP00000297338,9606.ENSP00000300093,9606.ENSP00000301633,9606.ENSP00000302530,9606.ENSP00000313950,9606.ENSP00000355922,9606.ENSP00000358813,9606.ENSP00000361540,9606.ENSP00000377536	TRIP13,ESPL1,BUB1B,MAD2L1,RAD21,PLK1,BIRC5,BUB1,AURKB,CENPF,TTK,CDC20,PTTG1
GO:0000281	Mitotic cytokinesis	17	70	0.95	2.61e-08	9606.ENSP00000257934,9606.ENSP00000260363,9606.ENSP00000265748,9606.ENSP00000300093,9606.ENSP00000301633,9606.ENSP00000336868,9606.ENSP00000360540,9606.ENSP00000363524,9606.ENSP00000367276,9606.ENSP00000376306,9606.ENSP00000377793,9606.ENSP00000378295,9606.ENSP00000378356,9606.ENSP00000404190,9606.ENSP00000410452,9606.ENSP00000432660,9606.ENSP00000453403	ESPL1,KIF23,ANLN,PLK1,BIRC5,CENPA,CEP55,KIF4A,CKAP2,CIT,PRC1,INCENP,KIF20A,RACGAP1,STMN1,CFL1,NUSAP1
GO:0051707	Response to other organism	77	1256	0.35	2.61e-08	9606.ENSP00000215754,9606.ENSP00000216341,9606.ENSP00000219150,9606.ENSP00000228928,9606.ENSP00000229239,9606.ENSP00000250092,9606.ENSP00000256722,9606.ENSP00000257570,9606.ENSP00000259938,9606.ENSP00000261267,9606.ENSP00000262345,9606.ENSP00000262428,9606.ENSP00000262629,9606.ENSP00000262746,9606.ENSP00000264246,9606.ENSP00000264832,9606.ENSP00000276708,9606.ENSP00000280326,9606.ENSP00000284878,…	MIF,GZMB,CORO1A,OAS3,GAPDH,CD68,CMPK2,OASL,CLPS,LYZ,IL12RB2,COTL1,TYROBP,PRDX1,CD80,ICAM1,GSDMC,CCT5,CXADR,CXCL13,SLAMF8,FCER1G,HMGB2,KRT16,CLEC7A,CXCL10,CXCL8,ISG20,CXCL11,PPP1R14B,TRIM59,HIST1H2BC,PMAIP1,APOBEC3B,CD86,SHMT2,TUBB,C15orf48,OAS2,IFI6,HIST1H2BK,CCL20,STAT1,CXCL9,EPRS,RGS1,S100A7,S100A8,S100A9,HIST2H2BE,FCGR1A,IRAK1,HMGB3,GBP5,IFI44L,LCN2,SRPK1,HLA-DQA2,HLA-DQB1,HLA-C,UBD,ISG15,KRT6…
GO:0010639	Negative regulation of organelle organization	38	395	0.54	3.07e-08	9606.ENSP00000166345,9606.ENSP00000219150,9606.ENSP00000225655,9606.ENSP00000233143,9606.ENSP00000239940,9606.ENSP00000244534,9606.ENSP00000244573,9606.ENSP00000257934,9606.ENSP00000263867,9606.ENSP00000265056,9606.ENSP00000287394,9606.ENSP00000287598,9606.ENSP00000296509,9606.ENSP00000297338,9606.ENSP00000300093,9606.ENSP00000300403,9606.ENSP00000301633,9606.ENSP00000302530,9606.ENSP00000307705,…	TRIP13,CORO1A,PFN1,TMSB10,PFN2,HIST1H1D,HIST1H1A,ESPL1,CAPG,MCM2,ATAD2,BUB1B,MAD2L1,RAD21,PLK1,TPX2,BIRC5,BUB1,HIST1H1E,AURKB,PIF1,HIST1H1B,HIST1H1C,DNMT1,HORMAD1,PARP1,CENPF,NEK2,TTK,SLC25A5,CDC20,CKAP2,PTTG1,HMGA1,STMN1,TOP2A,SPTBN2,ENSG00000158164
GO:0097549	Chromatin organization involved in negative regulation of transcription	20	108	0.83	4.02e-08	9606.ENSP00000296417,9606.ENSP00000320147,9606.ENSP00000332790,9606.ENSP00000333277,9606.ENSP00000341094,9606.ENSP00000347168,9606.ENSP00000351589,9606.ENSP00000352119,9606.ENSP00000352252,9606.ENSP00000355656,9606.ENSP00000358154,9606.ENSP00000358155,9606.ENSP00000366956,9606.ENSP00000366999,9606.ENSP00000367034,9606.ENSP00000377601,9606.ENSP00000385479,9606.ENSP00000399888,9606.ENSP00000418915,…	H2AFZ,EZH2,HIST2H2AB,HIST2H3D,HIST1H2AD,HIST1H4J,HIST1H2AI,HIST1H2AG,HIST1H3J,HIST3H2A,HIST2H3C,HIST2H2AA,HIST1H4H,HIST1H3D,HIST1H4C,HELLS,HIST2H3A,HMGA1,CDKN2A,H2AFX
GO:0051303	Establishment of chromosome localization	17	73	0.93	4.28e-08	9606.ENSP00000247191,9606.ENSP00000256442,9606.ENSP00000261597,9606.ENSP00000263181,9606.ENSP00000265148,9606.ENSP00000271452,9606.ENSP00000275517,9606.ENSP00000301019,9606.ENSP00000301633,9606.ENSP00000355922,9606.ENSP00000356319,9606.ENSP00000358925,9606.ENSP00000361298,9606.ENSP00000362146,9606.ENSP00000378295,9606.ENSP00000393963,9606.ENSP00000481110	DLGAP5,CCNB1,NDC80,KIF18A,CENPE,NUF2,CDCA5,CDT1,BIRC5,CENPF,KIF14,PSRC1,KIF2C,CDCA8,INCENP,KIFC1,FAM83D
GO:0034401	Chromatin organization involved in regulation of transcription	21	122	0.8	4.57e-08	9606.ENSP00000296417,9606.ENSP00000320147,9606.ENSP00000332790,9606.ENSP00000333277,9606.ENSP00000337226,9606.ENSP00000341094,9606.ENSP00000347168,9606.ENSP00000351589,9606.ENSP00000352119,9606.ENSP00000352252,9606.ENSP00000355656,9606.ENSP00000358154,9606.ENSP00000358155,9606.ENSP00000366956,9606.ENSP00000366999,9606.ENSP00000367034,9606.ENSP00000377601,9606.ENSP00000385479,9606.ENSP00000399888,…	H2AFZ,EZH2,HIST2H2AB,HIST2H3D,CDCA4,HIST1H2AD,HIST1H4J,HIST1H2AI,HIST1H2AG,HIST1H3J,HIST3H2A,HIST2H3C,HIST2H2AA,HIST1H4H,HIST1H3D,HIST1H4C,HELLS,HIST2H3A,HMGA1,CDKN2A,H2AFX
GO:2000816	Negative regulation of mitotic sister chromatid separation	12	27	1.21	4.57e-08	9606.ENSP00000166345,9606.ENSP00000287598,9606.ENSP00000296509,9606.ENSP00000297338,9606.ENSP00000300093,9606.ENSP00000301633,9606.ENSP00000302530,9606.ENSP00000313950,9606.ENSP00000355922,9606.ENSP00000358813,9606.ENSP00000361540,9606.ENSP00000377536	TRIP13,BUB1B,MAD2L1,RAD21,PLK1,BIRC5,BUB1,AURKB,CENPF,TTK,CDC20,PTTG1
GO:0061640	Cytoskeleton-dependent cytokinesis	19	98	0.85	5.48e-08	9606.ENSP00000257934,9606.ENSP00000260363,9606.ENSP00000265748,9606.ENSP00000300093,9606.ENSP00000301633,9606.ENSP00000313950,9606.ENSP00000336868,9606.ENSP00000360540,9606.ENSP00000363524,9606.ENSP00000367276,9606.ENSP00000376306,9606.ENSP00000377793,9606.ENSP00000378295,9606.ENSP00000378356,9606.ENSP00000379704,9606.ENSP00000404190,9606.ENSP00000410452,9606.ENSP00000432660,9606.ENSP00000453403	ESPL1,KIF23,ANLN,PLK1,BIRC5,AURKB,CENPA,CEP55,KIF4A,CKAP2,CIT,PRC1,INCENP,KIF20A,SEPT3,RACGAP1,STMN1,CFL1,NUSAP1
GO:0051310	Metaphase plate congression	15	54	1	5.85e-08	9606.ENSP00000256442,9606.ENSP00000261597,9606.ENSP00000263181,9606.ENSP00000265148,9606.ENSP00000271452,9606.ENSP00000275517,9606.ENSP00000301019,9606.ENSP00000355922,9606.ENSP00000356319,9606.ENSP00000358925,9606.ENSP00000361298,9606.ENSP00000362146,9606.ENSP00000378295,9606.ENSP00000393963,9606.ENSP00000481110	CCNB1,NDC80,KIF18A,CENPE,NUF2,CDCA5,CDT1,CENPF,KIF14,PSRC1,KIF2C,CDCA8,INCENP,KIFC1,FAM83D
GO:0033554	Cellular response to stress	94	1725	0.3	6.43e-08	9606.ENSP00000166345,9606.ENSP00000215754,9606.ENSP00000216117,9606.ENSP00000216122,9606.ENSP00000216911,9606.ENSP00000221486,9606.ENSP00000228843,9606.ENSP00000244745,9606.ENSP00000248958,9606.ENSP00000256442,9606.ENSP00000259008,9606.ENSP00000262105,9606.ENSP00000262746,9606.ENSP00000264156,9606.ENSP00000264233,9606.ENSP00000264596,9606.ENSP00000264832,9606.ENSP00000265056,9606.ENSP00000265440,…	TRIP13,MIF,HMOX1,MCM5,AURKA,RNASEH2A,RAD51AP1,SOX4,SDF2L1,CCNB1,BRIP1,MCM4,PRDX1,MCM6,POLQ,NEIL3,ICAM1,MCM2,TFEC,ERP27,BCL2A1,CCNA2,CDCA5,DSC2,PDIA4,HMGB2,RAD21,MELK,KIAA0101,PLK1,CHAF1A,SLC39A4,CTLA4,FEN1,CXCL10,CXCL8,RMI2,FANCI,CLSPN,GEN1,EZH2,CALR,CDC25C,E2F7,PMAIP1,P4HB,PIF1,EIF4EBP1,FOXM1,E2F1,HIST1H4J,BLM,WDHD1,EXO1,HIST3H2A,PARP1,DTL,UBE2T,HDGF,IRAK1,RAD54L,MMP9,LCN2,PGK1,HIST1H4H,HIST1H4C…
GO:0051225	Spindle assembly	18	88	0.87	7.13e-08	9606.ENSP00000216911,9606.ENSP00000217026,9606.ENSP00000260363,9606.ENSP00000260731,9606.ENSP00000300403,9606.ENSP00000301633,9606.ENSP00000313950,9606.ENSP00000339001,9606.ENSP00000355966,9606.ENSP00000356379,9606.ENSP00000357308,9606.ENSP00000361540,9606.ENSP00000362937,9606.ENSP00000363524,9606.ENSP00000377793,9606.ENSP00000378295,9606.ENSP00000393963,9606.ENSP00000404190	AURKA,MYBL2,KIF23,KIF11,TPX2,BIRC5,AURKB,TUBB,NEK2,ASPM,CENPW,CDC20,RCC1,KIF4A,PRC1,INCENP,KIFC1,RACGAP1
GO:0045931	Positive regulation of mitotic cell cycle	23	156	0.73	8.88e-08	9606.ENSP00000209728,9606.ENSP00000216911,9606.ENSP00000247191,9606.ENSP00000256442,9606.ENSP00000257934,9606.ENSP00000261597,9606.ENSP00000275517,9606.ENSP00000296509,9606.ENSP00000301019,9606.ENSP00000301633,9606.ENSP00000303706,9606.ENSP00000313950,9606.ENSP00000318977,9606.ENSP00000321656,9606.ENSP00000340691,9606.ENSP00000348838,9606.ENSP00000355958,9606.ENSP00000364585,9606.ENSP00000378699,…	CDC6,AURKA,DLGAP5,CCNB1,ESPL1,NDC80,CDCA5,MAD2L1,CDT1,BIRC5,CDC25A,AURKB,GEN1,CDC25C,EIF4EBP1,UBE2C,DTL,RCC2,CDK1,CDC7,RANBP1,CDC45,NUSAP1
GO:0000724	Double-strand break repair via homologous recombination	19	102	0.83	9.16e-08	9606.ENSP00000216122,9606.ENSP00000228843,9606.ENSP00000262105,9606.ENSP00000264156,9606.ENSP00000264233,9606.ENSP00000265056,9606.ENSP00000305480,9606.ENSP00000318977,9606.ENSP00000347232,9606.ENSP00000355759,9606.ENSP00000361043,9606.ENSP00000372088,9606.ENSP00000381378,9606.ENSP00000386239,9606.ENSP00000393139,9606.ENSP00000405726,9606.ENSP00000434024,9606.ENSP00000480987,9606.ENSP00000482313	MCM5,RAD51AP1,MCM4,MCM6,POLQ,MCM2,FEN1,GEN1,BLM,PARP1,RAD54L,RAD51,FANCB,TONSL,CDC7,CDC45,H2AFX,MCM3,RECQL4
GO:0040029	Regulation of gene expression, epigenetic	26	202	0.67	9.21e-08	9606.ENSP00000244534,9606.ENSP00000244573,9606.ENSP00000287394,9606.ENSP00000296417,9606.ENSP00000307705,9606.ENSP00000320147,9606.ENSP00000330074,9606.ENSP00000332790,9606.ENSP00000333277,9606.ENSP00000337226,9606.ENSP00000339566,9606.ENSP00000341094,9606.ENSP00000347168,9606.ENSP00000351589,9606.ENSP00000352119,9606.ENSP00000352252,9606.ENSP00000352516,9606.ENSP00000355656,9606.ENSP00000358154,…	HIST1H1D,HIST1H1A,ATAD2,H2AFZ,HIST1H1E,EZH2,HIST1H1B,HIST2H2AB,HIST2H3D,CDCA4,HIST1H1C,HIST1H2AD,HIST1H4J,HIST1H2AI,HIST1H2AG,HIST1H3J,DNMT1,HIST3H2A,HIST2H3C,HIST2H2AA,HIST1H4H,HIST1H3D,HIST1H4C,HIST2H3A,HMGA1,H2AFX
GO:0048518	Positive regulation of biological process	237	6112	0.15	1.07e-07	9606.ENSP00000209728,9606.ENSP00000215754,9606.ENSP00000216117,9606.ENSP00000216127,9606.ENSP00000216341,9606.ENSP00000216911,9606.ENSP00000217026,9606.ENSP00000217086,9606.ENSP00000219150,9606.ENSP00000222271,9606.ENSP00000225655,9606.ENSP00000225964,9606.ENSP00000226279,9606.ENSP00000226284,9606.ENSP00000229239,9606.ENSP00000233893,9606.ENSP00000236671,9606.ENSP00000239940,9606.ENSP00000242208,…	CDC6,MIF,HMOX1,RASD2,GZMB,AURKA,MYBL2,SALL4,CORO1A,COMP,PFN1,COL1A1,CD38,IBSP,GAPDH,HSPE1,CTSD,PFN2,INHBA,HIST1H1D,HIST1H1A,SOX4,DLGAP5,WISP1,COLGALT1,CCNB1,ADAM19,ESPL1,SULF1,KIF23,NDC80,CDK2AP1,IL12RB2,TYROBP,CCNE1,E2F3,EPCAM,NMU,CD80,UBE2S,ICAM1,DEPDC1B,CENPE,PITX1,TFEC,GAL,DBF4,ANLN,ARNTL2,SECTM1,PLK4,S100A11,CCNA2,PLA2G7,CDCA5,CCT5,OTX1,THY1,CXCL13,ATAD2,FCER1G,EN1,CCT3,KIAA1524,H2AFZ,POC1A,…
GO:0006302	Double-strand break repair	26	204	0.67	1.08e-07	9606.ENSP00000166345,9606.ENSP00000216122,9606.ENSP00000228843,9606.ENSP00000259008,9606.ENSP00000262105,9606.ENSP00000264156,9606.ENSP00000264233,9606.ENSP00000265056,9606.ENSP00000275517,9606.ENSP00000297338,9606.ENSP00000305480,9606.ENSP00000318977,9606.ENSP00000347168,9606.ENSP00000347232,9606.ENSP00000355759,9606.ENSP00000361043,9606.ENSP00000366956,9606.ENSP00000367034,9606.ENSP00000372088,…	TRIP13,MCM5,RAD51AP1,BRIP1,MCM4,MCM6,POLQ,MCM2,CDCA5,RAD21,FEN1,GEN1,HIST1H4J,BLM,PARP1,RAD54L,HIST1H4H,HIST1H4C,RAD51,FANCB,TONSL,CDC7,CDC45,H2AFX,MCM3,RECQL4
GO:0044085	Cellular component biogenesis	124	2583	0.24	1.18e-07	9606.ENSP00000166345,9606.ENSP00000215754,9606.ENSP00000216122,9606.ENSP00000216911,9606.ENSP00000217026,9606.ENSP00000219150,9606.ENSP00000244534,9606.ENSP00000244573,9606.ENSP00000254508,9606.ENSP00000256442,9606.ENSP00000259008,9606.ENSP00000260363,9606.ENSP00000260731,9606.ENSP00000262105,9606.ENSP00000263382,9606.ENSP00000263867,9606.ENSP00000264156,9606.ENSP00000264233,9606.ENSP00000264552,…	TRIP13,MIF,MCM5,AURKA,MYBL2,CORO1A,HIST1H1D,HIST1H1A,NUP210,CCNB1,BRIP1,KIF23,KIF11,MCM4,ASF1B,CAPG,MCM6,POLQ,UBE2S,MCM2,CENPE,ANLN,SQLE,PLK4,SNRPG,NDUFB9,CENPU,THY1,HIST1H2BD,CCT3,POC1A,HMGB2,PLK1,TPX2,CDT1,CHAF1A,BIRC5,TK1,RAC3,ISG20,BOLA2B,HIST1H1E,AURKB,CALR,HIST1H2BC,P4HB,HIST1H1B,BOLA2,HIST2H3D,SHMT2,CDKN3,CASC5,CENPA,TUBB,HIST1H1C,C20orf24,FN1,HIST1H4J,BLM,UBE2C,HIST1H2BK,HIST1H3J,RRM2,HOR…
GO:0048522	Positive regulation of cellular process	220	5579	0.16	1.72e-07	9606.ENSP00000209728,9606.ENSP00000215754,9606.ENSP00000216117,9606.ENSP00000216127,9606.ENSP00000216341,9606.ENSP00000216911,9606.ENSP00000217026,9606.ENSP00000217086,9606.ENSP00000219150,9606.ENSP00000222271,9606.ENSP00000225655,9606.ENSP00000225964,9606.ENSP00000226279,9606.ENSP00000226284,9606.ENSP00000229239,9606.ENSP00000233893,9606.ENSP00000236671,9606.ENSP00000239940,9606.ENSP00000242208,…	CDC6,MIF,HMOX1,RASD2,GZMB,AURKA,MYBL2,SALL4,CORO1A,COMP,PFN1,COL1A1,CD38,IBSP,GAPDH,HSPE1,CTSD,PFN2,INHBA,HIST1H1D,HIST1H1A,SOX4,DLGAP5,WISP1,COLGALT1,CCNB1,ADAM19,ESPL1,SULF1,KIF23,NDC80,CDK2AP1,IL12RB2,TYROBP,CCNE1,E2F3,EPCAM,NMU,CD80,UBE2S,ICAM1,DEPDC1B,CENPE,PITX1,TFEC,GAL,DBF4,ANLN,ARNTL2,SECTM1,PLK4,S100A11,CCNA2,PLA2G7,CDCA5,CCT5,OTX1,THY1,CXCL13,ATAD2,FCER1G,EN1,CCT3,KIAA1524,H2AFZ,POC1A,…
GO:0050789	Regulation of biological process	384	11475	0.08	2.23e-07	9606.ENSP00000166345,9606.ENSP00000209728,9606.ENSP00000215743,9606.ENSP00000215754,9606.ENSP00000215794,9606.ENSP00000216117,9606.ENSP00000216127,9606.ENSP00000216341,9606.ENSP00000216911,9606.ENSP00000217026,9606.ENSP00000217086,9606.ENSP00000218230,9606.ENSP00000219150,9606.ENSP00000222271,9606.ENSP00000225655,9606.ENSP00000225964,9606.ENSP00000226279,9606.ENSP00000226284,9606.ENSP00000228843,…	TRIP13,CDC6,MMP11,MIF,USP18,HMOX1,RASD2,GZMB,AURKA,MYBL2,SALL4,PCSK1N,CORO1A,COMP,PFN1,COL1A1,CD38,IBSP,RAD51AP1,OAS3,GAPDH,MDFI,TMSB10,HSPE1,SELL,CTSD,PFN2,INHBA,HIST1H1D,HIST1H1A,SOX4,DLGAP5,SDF2L1,CD68,WISP1,COLGALT1,NUP210,ADAMDEC1,CCNB1,ADAM19,OASL,ESPL1,IGF2BP3,BRIP1,SULF1,KIF23,KIF11,LMNB1,NDC80,CDK2AP1,PKMYT1,IL12RB2,COTL1,TYROBP,CCNE1,PRDX1,E2F3,KIF18A,EPCAM,CAPG,NMU,POLQ,CD80,UBE2S,ICAM…
GO:0045841	Negative regulation of mitotic metaphase/anaphase transition	11	25	1.2	2.34e-07	9606.ENSP00000166345,9606.ENSP00000287598,9606.ENSP00000296509,9606.ENSP00000297338,9606.ENSP00000300093,9606.ENSP00000301633,9606.ENSP00000302530,9606.ENSP00000313950,9606.ENSP00000355922,9606.ENSP00000358813,9606.ENSP00000361540	TRIP13,BUB1B,MAD2L1,RAD21,PLK1,BIRC5,BUB1,AURKB,CENPF,TTK,CDC20
GO:1901988	Negative regulation of cell cycle phase transition	27	235	0.62	3.74e-07	9606.ENSP00000166345,9606.ENSP00000209728,9606.ENSP00000216911,9606.ENSP00000244745,9606.ENSP00000256442,9606.ENSP00000287598,9606.ENSP00000296509,9606.ENSP00000297338,9606.ENSP00000300093,9606.ENSP00000301633,9606.ENSP00000302530,9606.ENSP00000312995,9606.ENSP00000313950,9606.ENSP00000320147,9606.ENSP00000321656,9606.ENSP00000323246,9606.ENSP00000345571,9606.ENSP00000347232,9606.ENSP00000355922,…	TRIP13,CDC6,AURKA,SOX4,CCNB1,BUB1B,MAD2L1,RAD21,PLK1,BIRC5,BUB1,CLSPN,AURKB,EZH2,CDC25C,E2F7,E2F1,BLM,CENPF,DTL,TTK,ORC1,CDC20,PCNA,CDK1,CDKN2A,E2F8
GO:1901991	Negative regulation of mitotic cell cycle phase transition	26	219	0.63	3.94e-07	9606.ENSP00000166345,9606.ENSP00000209728,9606.ENSP00000216911,9606.ENSP00000244745,9606.ENSP00000256442,9606.ENSP00000287598,9606.ENSP00000296509,9606.ENSP00000297338,9606.ENSP00000300093,9606.ENSP00000301633,9606.ENSP00000302530,9606.ENSP00000312995,9606.ENSP00000313950,9606.ENSP00000320147,9606.ENSP00000321656,9606.ENSP00000323246,9606.ENSP00000345571,9606.ENSP00000347232,9606.ENSP00000355922,…	TRIP13,CDC6,AURKA,SOX4,CCNB1,BUB1B,MAD2L1,RAD21,PLK1,BIRC5,BUB1,CLSPN,AURKB,EZH2,CDC25C,E2F7,E2F1,BLM,CENPF,TTK,ORC1,CDC20,PCNA,CDK1,CDKN2A,E2F8
GO:0032392	DNA geometric change	19	114	0.78	4.2e-07	9606.ENSP00000216122,9606.ENSP00000259008,9606.ENSP00000262105,9606.ENSP00000264156,9606.ENSP00000264233,9606.ENSP00000265056,9606.ENSP00000296503,9606.ENSP00000322180,9606.ENSP00000328174,9606.ENSP00000347232,9606.ENSP00000355759,9606.ENSP00000359393,9606.ENSP00000361043,9606.ENSP00000372088,9606.ENSP00000376272,9606.ENSP00000399888,9606.ENSP00000440402,9606.ENSP00000480987,9606.ENSP00000482313	MCM5,BRIP1,MCM4,MCM6,POLQ,MCM2,HMGB2,DSCC1,PIF1,BLM,PARP1,HMGB3,RAD54L,RAD51,RFC4,HMGA1,DDX11,MCM3,RECQL4
GO:0045930	Negative regulation of mitotic cell cycle	31	308	0.56	4.46e-07	9606.ENSP00000166345,9606.ENSP00000209728,9606.ENSP00000216911,9606.ENSP00000244745,9606.ENSP00000256442,9606.ENSP00000287598,9606.ENSP00000296509,9606.ENSP00000297338,9606.ENSP00000300093,9606.ENSP00000301019,9606.ENSP00000301633,9606.ENSP00000302530,9606.ENSP00000312995,9606.ENSP00000313950,9606.ENSP00000320147,9606.ENSP00000321656,9606.ENSP00000323246,9606.ENSP00000345571,9606.ENSP00000347232,…	TRIP13,CDC6,AURKA,SOX4,CCNB1,BUB1B,MAD2L1,RAD21,PLK1,CDT1,BIRC5,BUB1,CLSPN,AURKB,EZH2,CDC25C,E2F7,E2F1,BLM,CENPF,TTK,ORC1,CDC20,ZWINT,PCNA,FOXC1,PTTG1,CDK1,TOP2A,CDKN2A,E2F8
GO:0045814	Negative regulation of gene expression, epigenetic	18	103	0.8	5.58e-07	9606.ENSP00000296417,9606.ENSP00000320147,9606.ENSP00000332790,9606.ENSP00000333277,9606.ENSP00000341094,9606.ENSP00000347168,9606.ENSP00000351589,9606.ENSP00000352119,9606.ENSP00000352252,9606.ENSP00000352516,9606.ENSP00000355656,9606.ENSP00000358154,9606.ENSP00000358155,9606.ENSP00000366956,9606.ENSP00000366999,9606.ENSP00000367034,9606.ENSP00000385479,9606.ENSP00000434024	H2AFZ,EZH2,HIST2H2AB,HIST2H3D,HIST1H2AD,HIST1H4J,HIST1H2AI,HIST1H2AG,HIST1H3J,DNMT1,HIST3H2A,HIST2H3C,HIST2H2AA,HIST1H4H,HIST1H3D,HIST1H4C,HIST2H3A,H2AFX
GO:0006952	Defense response	74	1296	0.32	8.47e-07	9606.ENSP00000215754,9606.ENSP00000216117,9606.ENSP00000216341,9606.ENSP00000219150,9606.ENSP00000228928,9606.ENSP00000229239,9606.ENSP00000242208,9606.ENSP00000250092,9606.ENSP00000257570,9606.ENSP00000261267,9606.ENSP00000262428,9606.ENSP00000262629,9606.ENSP00000262746,9606.ENSP00000264832,9606.ENSP00000265643,9606.ENSP00000276708,9606.ENSP00000284878,9606.ENSP00000286758,9606.ENSP00000289707,…	MIF,HMOX1,GZMB,CORO1A,OAS3,GAPDH,INHBA,CD68,OASL,LYZ,COTL1,TYROBP,PRDX1,ICAM1,GAL,GSDMC,CXADR,CXCL13,SLAMF8,FCER1G,HMGB2,KRT16,CLEC7A,CXCL10,CXCL8,ISG20,CXCL11,PPP1R14B,TRIM59,HIST1H2BC,PMAIP1,APOBEC3B,SHMT2,TUBB,FPR3,OAS2,IFI6,TAP1,FN1,HIST1H2BK,CCL20,STAT1,CXCL9,EPRS,S100A7,S100A8,S100A9,HIST2H2BE,FCGR1A,IRAK1,HMGB3,GBP5,IFI44L,LCN2,SRPK1,HLA-DQA2,HLA-DQB1,HLA-C,UBD,ISG15,KRT6A,SDC1,RSAD2,SP140…
GO:0051716	Cellular response to stimulus	244	6489	0.14	8.47e-07	9606.ENSP00000166345,9606.ENSP00000209728,9606.ENSP00000215754,9606.ENSP00000216117,9606.ENSP00000216122,9606.ENSP00000216127,9606.ENSP00000216341,9606.ENSP00000216911,9606.ENSP00000217026,9606.ENSP00000218230,9606.ENSP00000219150,9606.ENSP00000221486,9606.ENSP00000222271,9606.ENSP00000225655,9606.ENSP00000225964,9606.ENSP00000226279,9606.ENSP00000226284,9606.ENSP00000228843,9606.ENSP00000228928,…	TRIP13,CDC6,MIF,HMOX1,MCM5,RASD2,GZMB,AURKA,MYBL2,PCSK1N,CORO1A,RNASEH2A,COMP,PFN1,COL1A1,CD38,IBSP,RAD51AP1,OAS3,GAPDH,INHBA,SOX4,DLGAP5,SDF2L1,CD68,WISP1,CCNB1,CMPK2,OASL,BRIP1,MRPL15,SULF1,MMP7,LMNB1,MCM4,IL12RB2,TYROBP,CCNE1,PRDX1,KIF18A,EPCAM,MCM6,NMU,POLQ,CD80,NEIL3,ICAM1,DEPDC1B,MCM2,TFEC,GAL,ERP27,BCL2A1,SECTM1,S100A11,CCNA2,CDCA5,DSC2,THY1,UCHL1,CXADR,PDIA4,CXCL13,SLAMF8,FCER1G,LAPTM5,H2…
GO:0098542	Defense response to other organism	58	900	0.37	8.5e-07	9606.ENSP00000215754,9606.ENSP00000216341,9606.ENSP00000219150,9606.ENSP00000228928,9606.ENSP00000229239,9606.ENSP00000257570,9606.ENSP00000261267,9606.ENSP00000262428,9606.ENSP00000262629,9606.ENSP00000262746,9606.ENSP00000264832,9606.ENSP00000276708,9606.ENSP00000284878,9606.ENSP00000286758,9606.ENSP00000289707,9606.ENSP00000289902,9606.ENSP00000296503,9606.ENSP00000301653,9606.ENSP00000302569,…	MIF,GZMB,CORO1A,OAS3,GAPDH,OASL,LYZ,COTL1,TYROBP,PRDX1,ICAM1,GSDMC,CXADR,CXCL13,SLAMF8,FCER1G,HMGB2,KRT16,CLEC7A,CXCL10,ISG20,PPP1R14B,TRIM59,HIST1H2BC,PMAIP1,APOBEC3B,SHMT2,TUBB,OAS2,IFI6,HIST1H2BK,CCL20,STAT1,CXCL9,EPRS,S100A7,S100A8,S100A9,HIST2H2BE,FCGR1A,IRAK1,HMGB3,GBP5,IFI44L,LCN2,SRPK1,HLA-DQA2,HLA-DQB1,HLA-C,UBD,ISG15,KRT6A,RSAD2,HLA-DRA,IFI30,HLA-B,CLEC5A,HIST1H2BJ
GO:0051784	Negative regulation of nuclear division	13	48	0.99	9.15e-07	9606.ENSP00000166345,9606.ENSP00000287598,9606.ENSP00000296509,9606.ENSP00000297338,9606.ENSP00000300093,9606.ENSP00000301633,9606.ENSP00000302530,9606.ENSP00000313950,9606.ENSP00000355167,9606.ENSP00000355922,9606.ENSP00000358813,9606.ENSP00000361540,9606.ENSP00000377536	TRIP13,BUB1B,MAD2L1,RAD21,PLK1,BIRC5,BUB1,AURKB,HORMAD1,CENPF,TTK,CDC20,PTTG1
GO:0030198	Extracellular matrix organization	32	338	0.54	9.22e-07	9606.ENSP00000215743,9606.ENSP00000222271,9606.ENSP00000225964,9606.ENSP00000226284,9606.ENSP00000257527,9606.ENSP00000260128,9606.ENSP00000260227,9606.ENSP00000260302,9606.ENSP00000264832,9606.ENSP00000303153,9606.ENSP00000322788,9606.ENSP00000327336,9606.ENSP00000327368,9606.ENSP00000341640,9606.ENSP00000346839,9606.ENSP00000357981,9606.ENSP00000359114,9606.ENSP00000361405,9606.ENSP00000362201,…	MMP11,COMP,COL1A1,IBSP,ADAM19,SULF1,MMP7,MMP13,ICAM1,COL22A1,MMP1,BGN,COL10A1,COL9A3,FN1,CTSS,COL11A1,MMP9,SPOCK2,ADAMTS14,MFAP2,PRDX4,POSTN,FOXC1,SPP1,LCP1,ACAN,FBN2,SERPINH1,ADAM8,ITGAX,GREM1
GO:0031570	DNA integrity checkpoint	21	151	0.7	1.04e-06	9606.ENSP00000209728,9606.ENSP00000216911,9606.ENSP00000244745,9606.ENSP00000256442,9606.ENSP00000259008,9606.ENSP00000300093,9606.ENSP00000301019,9606.ENSP00000312995,9606.ENSP00000321656,9606.ENSP00000323246,9606.ENSP00000345571,9606.ENSP00000347232,9606.ENSP00000355958,9606.ENSP00000360623,9606.ENSP00000368458,9606.ENSP00000378699,9606.ENSP00000405726,9606.ENSP00000411532,9606.ENSP00000434024,…	CDC6,AURKA,SOX4,CCNB1,BRIP1,PLK1,CDT1,CLSPN,CDC25C,E2F7,E2F1,BLM,DTL,ORC1,PCNA,CDK1,CDC45,TOP2A,H2AFX,TIMELESS,E2F8
GO:0007094	Mitotic spindle assembly checkpoint	10	23	1.2	1.28e-06	9606.ENSP00000166345,9606.ENSP00000287598,9606.ENSP00000296509,9606.ENSP00000300093,9606.ENSP00000301633,9606.ENSP00000302530,9606.ENSP00000313950,9606.ENSP00000355922,9606.ENSP00000358813,9606.ENSP00000361540	TRIP13,BUB1B,MAD2L1,PLK1,BIRC5,BUB1,AURKB,CENPF,TTK,CDC20
GO:0006270	DNA replication initiation	11	32	1.1	1.62e-06	9606.ENSP00000209728,9606.ENSP00000216122,9606.ENSP00000262105,9606.ENSP00000262643,9606.ENSP00000264156,9606.ENSP00000265056,9606.ENSP00000360623,9606.ENSP00000405726,9606.ENSP00000418268,9606.ENSP00000429089,9606.ENSP00000480987	CDC6,MCM5,MCM4,CCNE1,MCM6,MCM2,ORC1,CDC45,MCM10,CCNE2,MCM3
GO:0002252	Immune effector process	60	969	0.35	1.67e-06	9606.ENSP00000215754,9606.ENSP00000216341,9606.ENSP00000219150,9606.ENSP00000228928,9606.ENSP00000236147,9606.ENSP00000236671,9606.ENSP00000250092,9606.ENSP00000257570,9606.ENSP00000260118,9606.ENSP00000261267,9606.ENSP00000262428,9606.ENSP00000262629,9606.ENSP00000262746,9606.ENSP00000264832,9606.ENSP00000271638,9606.ENSP00000284878,9606.ENSP00000289902,9606.ENSP00000291568,9606.ENSP00000296370,…	MIF,GZMB,CORO1A,OAS3,SELL,CTSD,CD68,OASL,GGH,LYZ,COTL1,TYROBP,PRDX1,ICAM1,S100A11,CXADR,FCER1G,CSTB,S100P,CXCL10,ISG20,PKM,PMAIP1,APOBEC3B,TUBB,PLAUR,OAS2,IFI6,QPCT,CTSB,STAT1,PNP,CXCL9,ILF2,EXO1,FCGR3A,S100A7,S100A8,S100A9,CTSS,FCGR1A,IFI44L,MMP9,PLAU,LCN2,HLA-DQB1,HLA-C,CKAP4,PRDX4,ISG15,CALML5,RSAD2,PPAPDC1A,LCP1,TSTA3,HLA-B,MYO10,CLEC5A,ADAM8,ITGAX
GO:1901989	Positive regulation of cell cycle phase transition	17	99	0.79	1.69e-06	9606.ENSP00000209728,9606.ENSP00000247191,9606.ENSP00000256442,9606.ENSP00000257934,9606.ENSP00000275517,9606.ENSP00000301019,9606.ENSP00000301633,9606.ENSP00000303706,9606.ENSP00000320147,9606.ENSP00000321656,9606.ENSP00000348838,9606.ENSP00000355958,9606.ENSP00000364585,9606.ENSP00000378699,9606.ENSP00000393139,9606.ENSP00000405726,9606.ENSP00000481110	CDC6,DLGAP5,CCNB1,ESPL1,CDCA5,CDT1,BIRC5,CDC25A,EZH2,CDC25C,UBE2C,DTL,RCC2,CDK1,CDC7,CDC45,FAM83D
GO:0045132	Meiotic chromosome segregation	16	87	0.82	1.92e-06	9606.ENSP00000166345,9606.ENSP00000240423,9606.ENSP00000257934,9606.ENSP00000259008,9606.ENSP00000262643,9606.ENSP00000263753,9606.ENSP00000271452,9606.ENSP00000287598,9606.ENSP00000300093,9606.ENSP00000302530,9606.ENSP00000349961,9606.ENSP00000355167,9606.ENSP00000358813,9606.ENSP00000377536,9606.ENSP00000411532,9606.ENSP00000429089	TRIP13,NCAPH,ESPL1,BRIP1,CCNE1,SGOL1,NUF2,BUB1B,PLK1,BUB1,SMC4,HORMAD1,TTK,PTTG1,TOP2A,CCNE2
GO:0002478	Antigen processing and presentation of exogenous peptide antigen	22	174	0.66	2.04e-06	9606.ENSP00000236671,9606.ENSP00000260363,9606.ENSP00000260731,9606.ENSP00000263181,9606.ENSP00000265148,9606.ENSP00000289902,9606.ENSP00000320866,9606.ENSP00000324020,9606.ENSP00000346206,9606.ENSP00000357981,9606.ENSP00000358165,9606.ENSP00000361298,9606.ENSP00000363524,9606.ENSP00000364034,9606.ENSP00000364076,9606.ENSP00000364080,9606.ENSP00000365402,9606.ENSP00000378786,9606.ENSP00000384886,…	CTSD,KIF23,KIF11,KIF18A,CENPE,FCER1G,CALR,KIF15,TAP1,CTSS,FCGR1A,KIF2C,KIF4A,TAP2,HLA-DQA2,HLA-DQB1,HLA-C,HLA-DRA,IFI30,HLA-B,RACGAP1,SPTBN2
GO:0090307	Mitotic spindle assembly	12	43	1.01	2.38e-06	9606.ENSP00000217026,9606.ENSP00000260363,9606.ENSP00000260731,9606.ENSP00000300403,9606.ENSP00000301633,9606.ENSP00000313950,9606.ENSP00000355966,9606.ENSP00000361540,9606.ENSP00000363524,9606.ENSP00000377793,9606.ENSP00000393963,9606.ENSP00000404190	MYBL2,KIF23,KIF11,TPX2,BIRC5,AURKB,NEK2,CDC20,KIF4A,PRC1,KIFC1,RACGAP1
GO:0051383	Kinetochore organization	9	18	1.26	2.57e-06	9606.ENSP00000261597,9606.ENSP00000265148,9606.ENSP00000271452,9606.ENSP00000301019,9606.ENSP00000336868,9606.ENSP00000349961,9606.ENSP00000355922,9606.ENSP00000357308,9606.ENSP00000377007	NDC80,CENPE,NUF2,CDT1,CENPA,SMC4,CENPF,CENPW,CENPN
GO:0007080	Mitotic metaphase plate congression	12	44	1	2.91e-06	9606.ENSP00000256442,9606.ENSP00000261597,9606.ENSP00000263181,9606.ENSP00000265148,9606.ENSP00000271452,9606.ENSP00000275517,9606.ENSP00000301019,9606.ENSP00000356319,9606.ENSP00000358925,9606.ENSP00000361298,9606.ENSP00000362146,9606.ENSP00000393963	CCNB1,NDC80,KIF18A,CENPE,NUF2,CDCA5,CDT1,KIF14,PSRC1,KIF2C,CDCA8,KIFC1
GO:0010389	Regulation of g2/m transition of mitotic cell cycle	23	198	0.62	3.92e-06	9606.ENSP00000209728,9606.ENSP00000216911,9606.ENSP00000256442,9606.ENSP00000270861,9606.ENSP00000297338,9606.ENSP00000300093,9606.ENSP00000300403,9606.ENSP00000303706,9606.ENSP00000312995,9606.ENSP00000313950,9606.ENSP00000321656,9606.ENSP00000339001,9606.ENSP00000347232,9606.ENSP00000355922,9606.ENSP00000355958,9606.ENSP00000355966,9606.ENSP00000356319,9606.ENSP00000360623,9606.ENSP00000364585,…	CDC6,AURKA,CCNB1,PLK4,RAD21,PLK1,TPX2,CDC25A,CLSPN,AURKB,CDC25C,TUBB,BLM,CENPF,DTL,NEK2,KIF14,ORC1,RCC2,HMMR,CDK1,CDC7,CDKN2A
GO:0065007	Biological regulation	396	12171	0.07	3.92e-06	9606.ENSP00000166345,9606.ENSP00000209728,9606.ENSP00000215743,9606.ENSP00000215754,9606.ENSP00000215794,9606.ENSP00000216117,9606.ENSP00000216127,9606.ENSP00000216341,9606.ENSP00000216911,9606.ENSP00000217026,9606.ENSP00000217086,9606.ENSP00000218230,9606.ENSP00000219150,9606.ENSP00000222271,9606.ENSP00000225655,9606.ENSP00000225964,9606.ENSP00000226279,9606.ENSP00000226284,9606.ENSP00000228843,…	TRIP13,CDC6,MMP11,MIF,USP18,HMOX1,RASD2,GZMB,AURKA,MYBL2,SALL4,PCSK1N,CORO1A,COMP,PFN1,COL1A1,CD38,IBSP,RAD51AP1,OAS3,GAPDH,MDFI,TMSB10,HSPE1,SELL,CTSD,PFN2,NCAPH,INHBA,HIST1H1D,HIST1H1A,SOX4,DLGAP5,SDF2L1,CD68,WISP1,COLGALT1,NUP210,ADAMDEC1,CCNB1,ADAM19,OASL,ESPL1,IGF2BP3,BRIP1,CLPS,SULF1,KIF23,KIF11,LYZ,LMNB1,NDC80,CDK2AP1,PKMYT1,IL12RB2,COTL1,TYROBP,CCNE1,PRDX1,E2F3,KIF18A,EPCAM,CAPG,NMU,POLQ,…
GO:0051129	Negative regulation of cellular component organization	48	713	0.39	4.7e-06	9606.ENSP00000166345,9606.ENSP00000219150,9606.ENSP00000225655,9606.ENSP00000226279,9606.ENSP00000233143,9606.ENSP00000239940,9606.ENSP00000244534,9606.ENSP00000244573,9606.ENSP00000257934,9606.ENSP00000263867,9606.ENSP00000265056,9606.ENSP00000284240,9606.ENSP00000287394,9606.ENSP00000287598,9606.ENSP00000296509,9606.ENSP00000297338,9606.ENSP00000300093,9606.ENSP00000300403,9606.ENSP00000301633,…	TRIP13,CORO1A,PFN1,CD38,TMSB10,PFN2,HIST1H1D,HIST1H1A,ESPL1,CAPG,MCM2,THY1,ATAD2,BUB1B,MAD2L1,RAD21,PLK1,TPX2,BIRC5,BUB1,CXCL10,HIST1H1E,AURKB,PIF1,HIST1H1B,HIST1H1C,EIF4EBP1,DNMT1,HORMAD1,PARP1,CENPF,NEK2,KIF14,TTK,SLC25A5,CDC20,DKK1,RCC2,CKAP2,PTTG1,SPP1,HMGA1,STMN1,TOP2A,SPTBN2,APOC1,APOC2,ENSG00000158164
GO:1901992	Positive regulation of mitotic cell cycle phase transition	15	82	0.82	5.41e-06	9606.ENSP00000209728,9606.ENSP00000247191,9606.ENSP00000256442,9606.ENSP00000257934,9606.ENSP00000275517,9606.ENSP00000301019,9606.ENSP00000301633,9606.ENSP00000303706,9606.ENSP00000321656,9606.ENSP00000348838,9606.ENSP00000355958,9606.ENSP00000364585,9606.ENSP00000378699,9606.ENSP00000393139,9606.ENSP00000405726	CDC6,DLGAP5,CCNB1,ESPL1,CDCA5,CDT1,BIRC5,CDC25A,CDC25C,UBE2C,DTL,RCC2,CDK1,CDC7,CDC45
GO:0019886	Antigen processing and presentation of exogenous peptide antigen via mhc class ii	16	96	0.78	6.07e-06	9606.ENSP00000236671,9606.ENSP00000260363,9606.ENSP00000260731,9606.ENSP00000263181,9606.ENSP00000265148,9606.ENSP00000289902,9606.ENSP00000324020,9606.ENSP00000357981,9606.ENSP00000361298,9606.ENSP00000363524,9606.ENSP00000364076,9606.ENSP00000364080,9606.ENSP00000378786,9606.ENSP00000384886,9606.ENSP00000404190,9606.ENSP00000432568	CTSD,KIF23,KIF11,KIF18A,CENPE,FCER1G,KIF15,CTSS,KIF2C,KIF4A,HLA-DQA2,HLA-DQB1,HLA-DRA,IFI30,RACGAP1,SPTBN2
GO:0000079	Regulation of cyclin-dependent protein serine/threonine kinase activity	16	97	0.78	6.85e-06	9606.ENSP00000209728,9606.ENSP00000256442,9606.ENSP00000262300,9606.ENSP00000262643,9606.ENSP00000274026,9606.ENSP00000288207,9606.ENSP00000300093,9606.ENSP00000303706,9606.ENSP00000311083,9606.ENSP00000321656,9606.ENSP00000335357,9606.ENSP00000347232,9606.ENSP00000358925,9606.ENSP00000364976,9606.ENSP00000418915,9606.ENSP00000429089	CDC6,CCNB1,PKMYT1,CCNE1,CCNA2,CCNB2,PLK1,CDC25A,CKS1B,CDC25C,CDKN3,BLM,PSRC1,CKS2,CDKN2A,CCNE2
GO:0007127	Meiosis i	17	112	0.74	7.72e-06	9606.ENSP00000166345,9606.ENSP00000216911,9606.ENSP00000240488,9606.ENSP00000257934,9606.ENSP00000259008,9606.ENSP00000262643,9606.ENSP00000263753,9606.ENSP00000297338,9606.ENSP00000300093,9606.ENSP00000355167,9606.ENSP00000361043,9606.ENSP00000364976,9606.ENSP00000372088,9606.ENSP00000377536,9606.ENSP00000411532,9606.ENSP00000429089,9606.ENSP00000429633	TRIP13,AURKA,MND1,ESPL1,BRIP1,CCNE1,SGOL1,RAD21,PLK1,HORMAD1,RAD54L,CKS2,RAD51,PTTG1,TOP2A,CCNE2,MYBL1
GO:0045087	Innate immune response	47	703	0.39	7.72e-06	9606.ENSP00000215754,9606.ENSP00000216341,9606.ENSP00000219150,9606.ENSP00000228928,9606.ENSP00000229239,9606.ENSP00000257570,9606.ENSP00000262629,9606.ENSP00000262746,9606.ENSP00000264832,9606.ENSP00000289902,9606.ENSP00000296503,9606.ENSP00000301653,9606.ENSP00000302569,9606.ENSP00000306565,9606.ENSP00000310117,9606.ENSP00000311219,9606.ENSP00000321744,9606.ENSP00000327459,9606.ENSP00000333667,…	MIF,GZMB,CORO1A,OAS3,GAPDH,OASL,TYROBP,PRDX1,ICAM1,FCER1G,HMGB2,KRT16,CLEC7A,ISG20,PPP1R14B,TRIM59,HIST1H2BC,APOBEC3B,SHMT2,TUBB,OAS2,IFI6,HIST1H2BK,CCL20,STAT1,EPRS,S100A7,S100A8,S100A9,HIST2H2BE,FCGR1A,IRAK1,HMGB3,GBP5,LCN2,SRPK1,HLA-DQA2,HLA-DQB1,HLA-C,UBD,ISG15,RSAD2,HLA-DRA,IFI30,HLA-B,CLEC5A,HIST1H2BJ
GO:0010033	Response to organic substance	131	3011	0.2	8.73e-06	9606.ENSP00000209728,9606.ENSP00000215754,9606.ENSP00000216117,9606.ENSP00000217026,9606.ENSP00000219150,9606.ENSP00000222271,9606.ENSP00000225964,9606.ENSP00000226279,9606.ENSP00000226284,9606.ENSP00000228928,9606.ENSP00000229239,9606.ENSP00000233893,9606.ENSP00000236147,9606.ENSP00000242208,9606.ENSP00000244745,9606.ENSP00000248958,9606.ENSP00000250092,9606.ENSP00000256442,9606.ENSP00000256722,…	CDC6,MIF,HMOX1,MYBL2,CORO1A,COMP,COL1A1,CD38,IBSP,OAS3,GAPDH,HSPE1,SELL,INHBA,SOX4,SDF2L1,CD68,CCNB1,CMPK2,OASL,BRIP1,MRPL15,GGH,MMP13,LMNB1,IL12RB2,CCNE1,KIF18A,CD80,ICAM1,MCM2,GAL,SQLE,ERP27,CCNA2,CXCL13,FCER1G,LAPTM5,S100P,H2AFZ,HMGB2,CDT1,BIRC5,CLEC7A,LRP8,CXCL10,SHCBP1,CXCL8,ISG20,BOLA2B,CXCL11,TYMS,EZH2,PKM,CALR,MMP1,PMAIP1,TNFRSF12A,P4HB,BOLA2,CD86,HIST2H3D,SHMT2,TUBA1B,NME1,EIF4EBP1,OAS2,…
GO:0009605	Response to external stimulus	107	2310	0.23	1.04e-05	9606.ENSP00000215754,9606.ENSP00000216117,9606.ENSP00000216341,9606.ENSP00000218230,9606.ENSP00000219150,9606.ENSP00000225964,9606.ENSP00000228928,9606.ENSP00000229239,9606.ENSP00000250092,9606.ENSP00000256442,9606.ENSP00000256722,9606.ENSP00000257570,9606.ENSP00000259008,9606.ENSP00000259938,9606.ENSP00000260227,9606.ENSP00000261267,9606.ENSP00000262345,9606.ENSP00000262428,9606.ENSP00000262629,…	MIF,HMOX1,GZMB,PCSK1N,CORO1A,COL1A1,OAS3,GAPDH,CD68,CCNB1,CMPK2,OASL,BRIP1,CLPS,MMP7,LYZ,IL12RB2,COTL1,TYROBP,PRDX1,CD80,ICAM1,ARNTL2,GSDMC,CCT5,DSC2,CXADR,CXCL13,SLAMF8,FCER1G,HMGB2,SLC39A4,KRT16,CLEC7A,CXCL10,CXCL8,ISG20,CXCL11,PPP1R14B,TRIM59,TYMS,PKM,HIST1H2BC,PMAIP1,APOBEC3B,CD86,EPHB3,SHMT2,TUBB,PLAUR,EIF4EBP1,C15orf48,FPR3,OAS2,IFI6,HIST1H2BK,CCL20,STAT1,CXCL9,EPRS,RGS1,IGSF9,S100A7,S100A8…
GO:0034508	Centromere complex assembly	12	52	0.92	1.26e-05	9606.ENSP00000265148,9606.ENSP00000281453,9606.ENSP00000335463,9606.ENSP00000336868,9606.ENSP00000347168,9606.ENSP00000355922,9606.ENSP00000357308,9606.ENSP00000366956,9606.ENSP00000367034,9606.ENSP00000377007,9606.ENSP00000377601,9606.ENSP00000414109	CENPE,CENPU,CASC5,CENPA,HIST1H4J,CENPF,CENPW,HIST1H4H,HIST1H4C,CENPN,HELLS,HJURP
GO:0051984	Positive regulation of chromosome segregation	10	33	1.04	1.68e-05	9606.ENSP00000209728,9606.ENSP00000247191,9606.ENSP00000256442,9606.ENSP00000257934,9606.ENSP00000297338,9606.ENSP00000301019,9606.ENSP00000305480,9606.ENSP00000313950,9606.ENSP00000364585,9606.ENSP00000440402	CDC6,DLGAP5,CCNB1,ESPL1,RAD21,CDT1,FEN1,AURKB,RCC2,DDX11
GO:0033260	Nuclear dna replication	11	43	0.97	1.71e-05	9606.ENSP00000216122,9606.ENSP00000262105,9606.ENSP00000264156,9606.ENSP00000265056,9606.ENSP00000301019,9606.ENSP00000305480,9606.ENSP00000368458,9606.ENSP00000372088,9606.ENSP00000376272,9606.ENSP00000405726,9606.ENSP00000480987	MCM5,MCM4,MCM6,MCM2,CDT1,FEN1,PCNA,RAD51,RFC4,CDC45,MCM3
GO:0019882	Antigen processing and presentation	23	219	0.58	1.83e-05	9606.ENSP00000236671,9606.ENSP00000260363,9606.ENSP00000260731,9606.ENSP00000263181,9606.ENSP00000264832,9606.ENSP00000265148,9606.ENSP00000289902,9606.ENSP00000320866,9606.ENSP00000324020,9606.ENSP00000346206,9606.ENSP00000357981,9606.ENSP00000358165,9606.ENSP00000361298,9606.ENSP00000363524,9606.ENSP00000364034,9606.ENSP00000364076,9606.ENSP00000364080,9606.ENSP00000365402,9606.ENSP00000378786,…	CTSD,KIF23,KIF11,KIF18A,ICAM1,CENPE,FCER1G,CALR,KIF15,TAP1,CTSS,FCGR1A,KIF2C,KIF4A,TAP2,HLA-DQA2,HLA-DQB1,HLA-C,HLA-DRA,IFI30,HLA-B,RACGAP1,SPTBN2
GO:0032508	DNA duplex unwinding	16	106	0.74	1.85e-05	9606.ENSP00000216122,9606.ENSP00000259008,9606.ENSP00000262105,9606.ENSP00000264156,9606.ENSP00000264233,9606.ENSP00000265056,9606.ENSP00000322180,9606.ENSP00000328174,9606.ENSP00000347232,9606.ENSP00000355759,9606.ENSP00000372088,9606.ENSP00000376272,9606.ENSP00000399888,9606.ENSP00000440402,9606.ENSP00000480987,9606.ENSP00000482313	MCM5,BRIP1,MCM4,MCM6,POLQ,MCM2,DSCC1,PIF1,BLM,PARP1,RAD51,RFC4,HMGA1,DDX11,MCM3,RECQL4
GO:0050900	Leukocyte migration	28	316	0.51	2.22e-05	9606.ENSP00000215754,9606.ENSP00000219150,9606.ENSP00000225964,9606.ENSP00000236147,9606.ENSP00000261622,9606.ENSP00000263735,9606.ENSP00000264832,9606.ENSP00000284878,9606.ENSP00000286758,9606.ENSP00000289707,9606.ENSP00000289902,9606.ENSP00000305651,9606.ENSP00000306512,9606.ENSP00000306884,9606.ENSP00000322788,9606.ENSP00000345359,9606.ENSP00000346839,9606.ENSP00000351671,9606.ENSP00000354901,…	MIF,CORO1A,COL1A1,SELL,SLC7A5,EPCAM,ICAM1,CXADR,CXCL13,SLAMF8,FCER1G,CXCL10,CXCL8,CXCL11,MMP1,PODXL2,FN1,CCL20,CXCL9,S100A8,S100A9,EDN2,SDC1,CXCR4,ARTN,ADAM8,ITGAX,SLC16A3
GO:0070192	Chromosome organization involved in meiotic cell cycle	13	68	0.84	2.41e-05	9606.ENSP00000166345,9606.ENSP00000240423,9606.ENSP00000259008,9606.ENSP00000262643,9606.ENSP00000263753,9606.ENSP00000287598,9606.ENSP00000302530,9606.ENSP00000325017,9606.ENSP00000349961,9606.ENSP00000355167,9606.ENSP00000372088,9606.ENSP00000378295,9606.ENSP00000429089	TRIP13,NCAPH,BRIP1,CCNE1,SGOL1,BUB1B,BUB1,NCAPD2,SMC4,HORMAD1,RAD51,INCENP,CCNE2
GO:0000727	Double-strand break repair via break-induced replication	7	11	1.36	2.49e-05	9606.ENSP00000216122,9606.ENSP00000262105,9606.ENSP00000264156,9606.ENSP00000265056,9606.ENSP00000393139,9606.ENSP00000405726,9606.ENSP00000480987	MCM5,MCM4,MCM6,MCM2,CDC7,CDC45,MCM3
GO:0000083	Regulation of transcription involved in g1/s transition of mitotic cell cycle	10	35	1.02	2.54e-05	9606.ENSP00000209728,9606.ENSP00000262643,9606.ENSP00000301019,9606.ENSP00000315644,9606.ENSP00000323246,9606.ENSP00000345571,9606.ENSP00000353770,9606.ENSP00000360623,9606.ENSP00000368458,9606.ENSP00000405726	CDC6,CCNE1,CDT1,TYMS,E2F7,E2F1,RRM2,ORC1,PCNA,CDC45
GO:0071310	Cellular response to organic substance	107	2369	0.21	3.2e-05	9606.ENSP00000209728,9606.ENSP00000215754,9606.ENSP00000216117,9606.ENSP00000217026,9606.ENSP00000219150,9606.ENSP00000222271,9606.ENSP00000225964,9606.ENSP00000226284,9606.ENSP00000228928,9606.ENSP00000229239,9606.ENSP00000242208,9606.ENSP00000244745,9606.ENSP00000248958,9606.ENSP00000250092,9606.ENSP00000256442,9606.ENSP00000256722,9606.ENSP00000257570,9606.ENSP00000259008,9606.ENSP00000260102,…	CDC6,MIF,HMOX1,MYBL2,CORO1A,COMP,COL1A1,IBSP,OAS3,GAPDH,INHBA,SOX4,SDF2L1,CD68,CCNB1,CMPK2,OASL,BRIP1,MRPL15,LMNB1,IL12RB2,CCNE1,KIF18A,CD80,ICAM1,MCM2,CCNA2,CXCL13,FCER1G,LAPTM5,H2AFZ,HMGB2,BIRC5,CLEC7A,LRP8,CXCL10,SHCBP1,CXCL8,ISG20,BOLA2B,CXCL11,EZH2,PKM,CALR,MMP1,TNFRSF12A,P4HB,BOLA2,CD86,HIST2H3D,SHMT2,TUBA1B,NME1,EIF4EBP1,OAS2,IFI6,E2F1,CTSB,FN1,BLM,CCL20,HIST1H3J,DNMT1,STAT1,IQGAP3,CXCL9,P…
GO:0008284	Positive regulation of cell population proliferation	54	919	0.33	3.64e-05	9606.ENSP00000209728,9606.ENSP00000215754,9606.ENSP00000216117,9606.ENSP00000219150,9606.ENSP00000222271,9606.ENSP00000226279,9606.ENSP00000244745,9606.ENSP00000250160,9606.ENSP00000256442,9606.ENSP00000262345,9606.ENSP00000262643,9606.ENSP00000262904,9606.ENSP00000263735,9606.ENSP00000264246,9606.ENSP00000274026,9606.ENSP00000295746,9606.ENSP00000296503,9606.ENSP00000301633,9606.ENSP00000302569,…	CDC6,MIF,HMOX1,CORO1A,COMP,CD38,SOX4,WISP1,CCNB1,IL12RB2,CCNE1,E2F3,EPCAM,CD80,CCNA2,KIAA1524,HMGB2,BIRC5,CLEC7A,CXCL10,EZH2,CALR,SOX11,CTHRC1,CD86,SHMT2,NME1,FOXM1,E2F1,FN1,DNMT1,STAT1,IQGAP3,PNP,KIF14,ASPM,TTK,IRAK1,SLC25A5,MMP9,CDC20,EDN2,MARCKSL1,RTKN2,BAMBI,KRT6A,ESM1,PRC1,CDK1,SAPCD2,CDC7,PRAME,ITGAX,GREM1
GO:0031935	Regulation of chromatin silencing	8	19	1.18	3.7e-05	9606.ENSP00000244534,9606.ENSP00000244573,9606.ENSP00000287394,9606.ENSP00000307705,9606.ENSP00000330074,9606.ENSP00000339566,9606.ENSP00000399888,9606.ENSP00000405726	HIST1H1D,HIST1H1A,ATAD2,HIST1H1E,HIST1H1B,HIST1H1C,HMGA1,CDC45
GO:0051302	Regulation of cell division	21	197	0.59	4.73e-05	9606.ENSP00000209728,9606.ENSP00000216911,9606.ENSP00000247191,9606.ENSP00000257934,9606.ENSP00000260363,9606.ENSP00000270861,9606.ENSP00000300093,9606.ENSP00000313950,9606.ENSP00000323246,9606.ENSP00000347232,9606.ENSP00000356319,9606.ENSP00000356379,9606.ENSP00000357189,9606.ENSP00000376306,9606.ENSP00000377793,9606.ENSP00000378295,9606.ENSP00000378356,9606.ENSP00000404190,9606.ENSP00000453403,…	CDC6,AURKA,DLGAP5,ESPL1,KIF23,PLK4,PLK1,AURKB,E2F7,BLM,KIF14,ASPM,HDGF,CIT,PRC1,INCENP,KIF20A,RACGAP1,NUSAP1,KIF18B,E2F8
GO:0000003	Reproduction	72	1403	0.27	5.33e-05	9606.ENSP00000166345,9606.ENSP00000216911,9606.ENSP00000226279,9606.ENSP00000230321,9606.ENSP00000240423,9606.ENSP00000240488,9606.ENSP00000242208,9606.ENSP00000244573,9606.ENSP00000256442,9606.ENSP00000257527,9606.ENSP00000257934,9606.ENSP00000259008,9606.ENSP00000260227,9606.ENSP00000262643,9606.ENSP00000263181,9606.ENSP00000263382,9606.ENSP00000263753,9606.ENSP00000264832,9606.ENSP00000270861,…	TRIP13,AURKA,CD38,MDFI,NCAPH,MND1,INHBA,HIST1H1A,CCNB1,ADAM19,ESPL1,BRIP1,MMP7,CCNE1,KIF18A,ASF1B,SGOL1,ICAM1,PLK4,NUF2,ST14,CCT5,CXADR,BUB1B,CCT3,KIAA1524,RPL39L,POC1A,HMGB2,RAD21,PLK1,BUB1,CBX2,CALR,E2F7,NCAPD2,LIN9,CASC5,COL9A3,E2F1,CTSB,SMC4,HORMAD1,EXO1,NEK2,ASPM,TTK,RAD54L,MMP9,SRPK1,CKS2,PCNA,PRDX4,FOXC1,SDC1,RAD51,GJB2,FANCA,PTTG1,INCENP,SPP1,CDK1,KIFC1,RACGAP1,TOP2A,SLC2A1,CCNE2,MYBL1,ID…
GO:0043170	Macromolecule metabolic process	224	6137	0.12	5.73e-05	9606.ENSP00000005286,9606.ENSP00000166345,9606.ENSP00000209728,9606.ENSP00000215743,9606.ENSP00000215794,9606.ENSP00000216122,9606.ENSP00000216341,9606.ENSP00000216911,9606.ENSP00000218230,9606.ENSP00000221486,9606.ENSP00000222271,9606.ENSP00000228843,9606.ENSP00000229239,9606.ENSP00000236671,9606.ENSP00000240488,9606.ENSP00000242208,9606.ENSP00000242776,9606.ENSP00000244534,9606.ENSP00000248958,…	TMEM132A,TRIP13,CDC6,MMP11,USP18,MCM5,GZMB,AURKA,PCSK1N,RNASEH2A,COMP,RAD51AP1,GAPDH,CTSD,MND1,INHBA,DDX39A,HIST1H1D,SDF2L1,NUP210,ADAMDEC1,CCNB1,ADAM19,ESPL1,IGF2BP3,BRIP1,MRPL15,GGH,SULF1,MMP7,MMP13,LYZ,CDK2AP1,MCM4,PKMYT1,IL12RB2,CCNE1,E2F3,MCM6,POLQ,UBE2S,NEIL3,MCM2,DBF4,PLK4,SNRPG,CCNA2,CDCA5,ST14,THY1,UCHL1,BUB1B,HIST1H2BD,FCER1G,RPL39L,HMGB2,MAD2L1,RAD21,MELK,KIAA0101,PLK1,CDT1,CHAF1A,EVPL…
GO:0044260	Cellular macromolecule metabolic process	189	4976	0.14	6.33e-05	9606.ENSP00000005286,9606.ENSP00000166345,9606.ENSP00000209728,9606.ENSP00000215794,9606.ENSP00000216122,9606.ENSP00000216911,9606.ENSP00000221486,9606.ENSP00000228843,9606.ENSP00000229239,9606.ENSP00000240488,9606.ENSP00000242208,9606.ENSP00000244534,9606.ENSP00000248958,9606.ENSP00000254508,9606.ENSP00000256442,9606.ENSP00000258729,9606.ENSP00000259008,9606.ENSP00000260102,9606.ENSP00000260128,…	TMEM132A,TRIP13,CDC6,USP18,MCM5,AURKA,RNASEH2A,RAD51AP1,GAPDH,MND1,INHBA,HIST1H1D,SDF2L1,NUP210,CCNB1,IGF2BP3,BRIP1,MRPL15,SULF1,MMP13,LYZ,CDK2AP1,MCM4,PKMYT1,IL12RB2,CCNE1,E2F3,MCM6,POLQ,UBE2S,NEIL3,MCM2,DBF4,PLK4,SNRPG,CCNA2,CDCA5,THY1,UCHL1,BUB1B,HIST1H2BD,FCER1G,RPL39L,HMGB2,MAD2L1,RAD21,MELK,KIAA0101,PLK1,CDT1,CHAF1A,EVPL,BIRC5,TK1,BUB1,CDC25A,FEN1,CXCL8,MRPL13,ISG20,HIST1H1E,RMI2,FANCI,TRIM…
GO:0032465	Regulation of cytokinesis	14	89	0.76	6.47e-05	9606.ENSP00000209728,9606.ENSP00000216911,9606.ENSP00000260363,9606.ENSP00000270861,9606.ENSP00000300093,9606.ENSP00000313950,9606.ENSP00000323246,9606.ENSP00000356319,9606.ENSP00000376306,9606.ENSP00000377793,9606.ENSP00000378295,9606.ENSP00000378356,9606.ENSP00000404190,9606.ENSP00000481103	CDC6,AURKA,KIF23,PLK4,PLK1,AURKB,E2F7,KIF14,CIT,PRC1,INCENP,KIF20A,RACGAP1,E2F8
GO:0008608	Attachment of spindle microtubules to kinetochore	8	21	1.14	6.58e-05	9606.ENSP00000261597,9606.ENSP00000263753,9606.ENSP00000265148,9606.ENSP00000271452,9606.ENSP00000301019,9606.ENSP00000313950,9606.ENSP00000335463,9606.ENSP00000361298	NDC80,SGOL1,CENPE,NUF2,CDT1,AURKB,CASC5,KIF2C
GO:0050790	Regulation of catalytic activity	106	2386	0.21	7.52e-05	9606.ENSP00000209728,9606.ENSP00000215754,9606.ENSP00000218230,9606.ENSP00000225655,9606.ENSP00000228928,9606.ENSP00000229239,9606.ENSP00000233893,9606.ENSP00000236671,9606.ENSP00000239940,9606.ENSP00000240423,9606.ENSP00000256442,9606.ENSP00000257570,9606.ENSP00000259938,9606.ENSP00000262300,9606.ENSP00000262643,9606.ENSP00000264552,9606.ENSP00000264832,9606.ENSP00000265036,9606.ENSP00000265056,…	CDC6,MIF,PCSK1N,PFN1,OAS3,GAPDH,HSPE1,CTSD,PFN2,NCAPH,CCNB1,OASL,CLPS,PKMYT1,CCNE1,UBE2S,ICAM1,DEPDC1B,MCM2,CENPE,DBF4,CCNA2,THY1,UCHL1,CXCL13,CCNB2,SLAMF8,CSTB,HMGB2,MAD2L1,A2ML1,PLK1,TPX2,BIRC5,CLEC7A,LRP8,CDC25A,CXCL10,CST1,PPP1R14B,CKS1B,CLSPN,AURKB,EZH2,CDC25C,DSCC1,PMAIP1,PIF1,CD86,EPHB3,CDKN3,CASC5,PLAUR,OAS2,IFI6,CTSB,FN1,BLM,UBE2C,CCL20,IQGAP3,ARHGAP11A,PPP1R14C,PARP1,NEK2,KIF14,RGS1,S10…
GO:0051052	Regulation of dna metabolic process	29	360	0.47	7.75e-05	9606.ENSP00000228843,9606.ENSP00000244534,9606.ENSP00000244573,9606.ENSP00000264233,9606.ENSP00000280326,9606.ENSP00000295688,9606.ENSP00000301019,9606.ENSP00000307705,9606.ENSP00000310356,9606.ENSP00000313950,9606.ENSP00000322180,9606.ENSP00000328174,9606.ENSP00000330074,9606.ENSP00000339566,9606.ENSP00000342307,9606.ENSP00000347232,9606.ENSP00000355759,9606.ENSP00000355966,9606.ENSP00000368458,…	RAD51AP1,HIST1H1D,HIST1H1A,POLQ,CCT5,CCT3,CDT1,HIST1H1E,RMI2,AURKB,DSCC1,PIF1,HIST1H1B,HIST1H1C,FOXM1,BLM,PARP1,NEK2,PCNA,RAD51,RFC4,FANCB,CDKN2A,ALYREF,H2AFX,KPNA2,DDX11,TIMELESS,GREM1
GO:0031936	Negative regulation of chromatin silencing	7	14	1.26	7.86e-05	9606.ENSP00000244534,9606.ENSP00000244573,9606.ENSP00000287394,9606.ENSP00000307705,9606.ENSP00000330074,9606.ENSP00000339566,9606.ENSP00000399888	HIST1H1D,HIST1H1A,ATAD2,HIST1H1E,HIST1H1B,HIST1H1C,HMGA1
GO:0042127	Regulation of cell population proliferation	80	1642	0.25	8.04e-05	9606.ENSP00000209728,9606.ENSP00000215754,9606.ENSP00000216117,9606.ENSP00000219150,9606.ENSP00000222271,9606.ENSP00000226279,9606.ENSP00000242208,9606.ENSP00000244745,9606.ENSP00000250160,9606.ENSP00000256442,9606.ENSP00000259008,9606.ENSP00000260128,9606.ENSP00000262345,9606.ENSP00000262629,9606.ENSP00000262643,9606.ENSP00000262904,9606.ENSP00000263735,9606.ENSP00000264246,9606.ENSP00000265643,…	CDC6,MIF,HMOX1,CORO1A,COMP,CD38,INHBA,SOX4,WISP1,CCNB1,BRIP1,SULF1,IL12RB2,TYROBP,CCNE1,E2F3,EPCAM,CD80,GAL,SQLE,S100A11,CCNA2,CXADR,KIAA1524,HMGB2,BIRC5,CLEC7A,CTLA4,CXCL10,SHCBP1,CXCL8,CXCL11,CDCA7,EZH2,CALR,SOX11,E2F7,CTHRC1,IDH2,CD86,SHMT2,CDKN3,NME1,FOXM1,E2F1,FN1,DHCR7,DNMT1,STAT1,IQGAP3,PNP,CXCL9,KIF14,ASPM,TTK,IRAK1,SLC25A5,MMP9,CDC20,EDN2,PLAU,MARCKSL1,RTKN2,BAMBI,MAGED1,PRDX4,KRT6A,ESM1…
GO:0000018	Regulation of dna recombination	15	106	0.71	8.38e-05	9606.ENSP00000228843,9606.ENSP00000244534,9606.ENSP00000244573,9606.ENSP00000264233,9606.ENSP00000307705,9606.ENSP00000310356,9606.ENSP00000330074,9606.ENSP00000339566,9606.ENSP00000347232,9606.ENSP00000355759,9606.ENSP00000372088,9606.ENSP00000381378,9606.ENSP00000421592,9606.ENSP00000438483,9606.ENSP00000450607	RAD51AP1,HIST1H1D,HIST1H1A,POLQ,HIST1H1E,RMI2,HIST1H1B,HIST1H1C,BLM,PARP1,RAD51,FANCB,ALYREF,KPNA2,TIMELESS
GO:0060968	Regulation of gene silencing	17	137	0.65	8.38e-05	9606.ENSP00000244534,9606.ENSP00000244573,9606.ENSP00000254508,9606.ENSP00000287394,9606.ENSP00000307705,9606.ENSP00000330074,9606.ENSP00000333277,9606.ENSP00000339566,9606.ENSP00000347168,9606.ENSP00000352252,9606.ENSP00000358154,9606.ENSP00000366956,9606.ENSP00000366999,9606.ENSP00000367034,9606.ENSP00000385479,9606.ENSP00000399888,9606.ENSP00000405726	HIST1H1D,HIST1H1A,NUP210,ATAD2,HIST1H1E,HIST1H1B,HIST2H3D,HIST1H1C,HIST1H4J,HIST1H3J,HIST2H3C,HIST1H4H,HIST1H3D,HIST1H4C,HIST2H3A,HMGA1,CDC45
GO:0006338	Chromatin remodeling	21	206	0.57	8.6e-05	9606.ENSP00000281453,9606.ENSP00000296503,9606.ENSP00000333277,9606.ENSP00000335463,9606.ENSP00000336868,9606.ENSP00000347168,9606.ENSP00000352252,9606.ENSP00000357308,9606.ENSP00000358154,9606.ENSP00000359393,9606.ENSP00000366956,9606.ENSP00000366999,9606.ENSP00000367034,9606.ENSP00000377007,9606.ENSP00000377601,9606.ENSP00000385479,9606.ENSP00000395654,9606.ENSP00000399888,9606.ENSP00000414109,…	CENPU,HMGB2,HIST2H3D,CASC5,CENPA,HIST1H4J,HIST1H3J,CENPW,HIST2H3C,HMGB3,HIST1H4H,HIST1H3D,HIST1H4C,CENPN,HELLS,HIST2H3A,SMARCA4,HMGA1,HJURP,CDKN2A,ANP32E
GO:0022414	Reproductive process	71	1400	0.27	9.12e-05	9606.ENSP00000166345,9606.ENSP00000216911,9606.ENSP00000226279,9606.ENSP00000230321,9606.ENSP00000240423,9606.ENSP00000240488,9606.ENSP00000242208,9606.ENSP00000244573,9606.ENSP00000256442,9606.ENSP00000257527,9606.ENSP00000257934,9606.ENSP00000259008,9606.ENSP00000260227,9606.ENSP00000262643,9606.ENSP00000263181,9606.ENSP00000263382,9606.ENSP00000263753,9606.ENSP00000264832,9606.ENSP00000270861,…	TRIP13,AURKA,CD38,MDFI,NCAPH,MND1,INHBA,HIST1H1A,CCNB1,ADAM19,ESPL1,BRIP1,MMP7,CCNE1,KIF18A,ASF1B,SGOL1,ICAM1,PLK4,NUF2,ST14,CCT5,CXADR,BUB1B,CCT3,KIAA1524,RPL39L,POC1A,HMGB2,RAD21,PLK1,BUB1,CBX2,CALR,E2F7,NCAPD2,CASC5,COL9A3,E2F1,CTSB,SMC4,HORMAD1,EXO1,NEK2,ASPM,TTK,RAD54L,MMP9,SRPK1,CKS2,PCNA,PRDX4,FOXC1,SDC1,RAD51,GJB2,FANCA,PTTG1,INCENP,SPP1,CDK1,KIFC1,RACGAP1,TOP2A,SLC2A1,CCNE2,MYBL1,IDO1,H2…
GO:0007062	Sister chromatid cohesion	10	42	0.94	9.6e-05	9606.ENSP00000263753,9606.ENSP00000275517,9606.ENSP00000287598,9606.ENSP00000297338,9606.ENSP00000300093,9606.ENSP00000302530,9606.ENSP00000322180,9606.ENSP00000355167,9606.ENSP00000361540,9606.ENSP00000440402	SGOL1,CDCA5,BUB1B,RAD21,PLK1,BUB1,DSCC1,HORMAD1,CDC20,DDX11
GO:0042119	Neutrophil activation	35	497	0.41	0.0001	9606.ENSP00000215754,9606.ENSP00000236147,9606.ENSP00000236671,9606.ENSP00000250092,9606.ENSP00000260118,9606.ENSP00000261267,9606.ENSP00000262428,9606.ENSP00000262629,9606.ENSP00000271638,9606.ENSP00000289902,9606.ENSP00000291568,9606.ENSP00000296370,9606.ENSP00000306512,9606.ENSP00000320171,9606.ENSP00000339001,9606.ENSP00000339328,9606.ENSP00000344829,9606.ENSP00000345672,9606.ENSP00000354532,…	MIF,SELL,CTSD,CD68,GGH,LYZ,COTL1,TYROBP,S100A11,FCER1G,CSTB,S100P,CXCL8,PKM,TUBB,PLAUR,QPCT,CTSB,PNP,ILF2,S100A7,S100A8,S100A9,CTSS,MMP9,PLAU,LCN2,HLA-C,CKAP4,PRDX4,CALML5,HLA-B,CLEC5A,ADAM8,ITGAX
GO:0006268	DNA unwinding involved in DNA replication	7	15	1.23	0.00011	9606.ENSP00000262105,9606.ENSP00000264156,9606.ENSP00000265056,9606.ENSP00000347232,9606.ENSP00000372088,9606.ENSP00000399888,9606.ENSP00000482313	MCM4,MCM6,MCM2,BLM,RAD51,HMGA1,RECQL4
GO:0070887	Cellular response to chemical stimulus	123	2919	0.18	0.00011	9606.ENSP00000209728,9606.ENSP00000215754,9606.ENSP00000216117,9606.ENSP00000217026,9606.ENSP00000219150,9606.ENSP00000222271,9606.ENSP00000225964,9606.ENSP00000226284,9606.ENSP00000228928,9606.ENSP00000229239,9606.ENSP00000242208,9606.ENSP00000244745,9606.ENSP00000248958,9606.ENSP00000250092,9606.ENSP00000256442,9606.ENSP00000256722,9606.ENSP00000257570,9606.ENSP00000259008,9606.ENSP00000260102,…	CDC6,MIF,HMOX1,MYBL2,CORO1A,COMP,COL1A1,IBSP,OAS3,GAPDH,INHBA,SOX4,SDF2L1,CD68,CCNB1,CMPK2,OASL,BRIP1,MRPL15,LMNB1,IL12RB2,CCNE1,PRDX1,KIF18A,CD80,ICAM1,MCM2,CCNA2,UCHL1,CXADR,CXCL13,SLAMF8,FCER1G,LAPTM5,H2AFZ,HMGB2,MELK,BIRC5,CLEC7A,LRP8,CXCL10,SHCBP1,CXCL8,ISG20,BOLA2B,CXCL11,EZH2,PKM,CALR,MMP1,PMAIP1,TNFRSF12A,P4HB,BOLA2,CD86,HIST2H3D,SHMT2,TUBA1B,NME1,EIF4EBP1,OAS2,IFI6,E2F1,CTSB,FN1,BLM,CCL2…
GO:0032200	Telomere organization	16	125	0.67	0.00012	9606.ENSP00000262643,9606.ENSP00000305480,9606.ENSP00000328174,9606.ENSP00000347168,9606.ENSP00000347232,9606.ENSP00000352252,9606.ENSP00000355506,9606.ENSP00000355759,9606.ENSP00000366956,9606.ENSP00000366999,9606.ENSP00000367034,9606.ENSP00000368458,9606.ENSP00000372088,9606.ENSP00000376272,9606.ENSP00000429089,9606.ENSP00000482313	CCNE1,FEN1,PIF1,HIST1H4J,BLM,HIST1H3J,EXO1,PARP1,HIST1H4H,HIST1H3D,HIST1H4C,PCNA,RAD51,RFC4,CCNE2,RECQL4
GO:0001906	Cell killing	16	126	0.66	0.00013	9606.ENSP00000216341,9606.ENSP00000219150,9606.ENSP00000229239,9606.ENSP00000261267,9606.ENSP00000262746,9606.ENSP00000286758,9606.ENSP00000305651,9606.ENSP00000306512,9606.ENSP00000306884,9606.ENSP00000339001,9606.ENSP00000349430,9606.ENSP00000351671,9606.ENSP00000354901,9606.ENSP00000369317,9606.ENSP00000398803,9606.ENSP00000476136	GZMB,CORO1A,GAPDH,LYZ,PRDX1,CXCL13,CXCL10,CXCL8,CXCL11,TUBB,HIST1H2BK,CCL20,CXCL9,KRT6A,TSTA3,HIST1H2BJ
GO:0002443	Leukocyte mediated immunity	41	641	0.37	0.00013	9606.ENSP00000215754,9606.ENSP00000216341,9606.ENSP00000219150,9606.ENSP00000236147,9606.ENSP00000236671,9606.ENSP00000250092,9606.ENSP00000260118,9606.ENSP00000261267,9606.ENSP00000262428,9606.ENSP00000262629,9606.ENSP00000262746,9606.ENSP00000264832,9606.ENSP00000271638,9606.ENSP00000289902,9606.ENSP00000291568,9606.ENSP00000296370,9606.ENSP00000320171,9606.ENSP00000339001,9606.ENSP00000339328,…	MIF,GZMB,CORO1A,SELL,CTSD,CD68,GGH,LYZ,COTL1,TYROBP,PRDX1,ICAM1,S100A11,FCER1G,CSTB,S100P,PKM,TUBB,PLAUR,QPCT,CTSB,PNP,ILF2,EXO1,S100A7,S100A8,S100A9,CTSS,MMP9,PLAU,LCN2,HLA-DQB1,HLA-C,CKAP4,PRDX4,CALML5,TSTA3,HLA-B,CLEC5A,ADAM8,ITGAX
GO:2000113	Negative regulation of cellular macromolecule biosynthetic process	73	1470	0.26	0.00013	9606.ENSP00000209728,9606.ENSP00000216341,9606.ENSP00000217086,9606.ENSP00000226279,9606.ENSP00000229239,9606.ENSP00000230321,9606.ENSP00000244534,9606.ENSP00000258729,9606.ENSP00000262643,9606.ENSP00000262904,9606.ENSP00000265340,9606.ENSP00000271638,9606.ENSP00000272937,9606.ENSP00000295206,9606.ENSP00000296417,9606.ENSP00000296503,9606.ENSP00000300093,9606.ENSP00000301633,9606.ENSP00000306548,…	CDC6,GZMB,SALL4,CD38,GAPDH,MDFI,HIST1H1D,IGF2BP3,CCNE1,E2F3,PITX1,S100A11,HES6,EN1,H2AFZ,HMGB2,PLK1,BIRC5,MRPL13,HIST1H1E,CBX2,AURKB,TYMS,EZH2,CALR,SOX11,E2F7,PIF1,HIST1H1B,HIST2H2AB,HIST2H3D,HIST1H1C,EIF4EBP1,HIST1H2AD,ETV7,FOXM1,E2F1,HIST1H4J,BLM,HIST1H2AI,HIST1H2AG,HIST1H3J,DNMT1,STAT1,E2F2,HIST3H2A,PARP1,EPRS,CENPF,HDGF,HIST2H3C,HIST2H2AA,DKK1,MAGED1,HIST1H4H,HIST1H3D,HIST1H4C,PCNA,FOXC1,LILR…
GO:0010558	Negative regulation of macromolecule biosynthetic process	75	1534	0.25	0.00015	9606.ENSP00000209728,9606.ENSP00000216341,9606.ENSP00000217086,9606.ENSP00000226279,9606.ENSP00000229239,9606.ENSP00000230321,9606.ENSP00000244534,9606.ENSP00000258729,9606.ENSP00000262643,9606.ENSP00000262904,9606.ENSP00000265340,9606.ENSP00000265440,9606.ENSP00000271638,9606.ENSP00000272937,9606.ENSP00000295206,9606.ENSP00000296417,9606.ENSP00000296503,9606.ENSP00000300093,9606.ENSP00000301633,…	CDC6,GZMB,SALL4,CD38,GAPDH,MDFI,HIST1H1D,IGF2BP3,CCNE1,E2F3,PITX1,TFEC,S100A11,HES6,EN1,H2AFZ,HMGB2,PLK1,BIRC5,MRPL13,HIST1H1E,CBX2,AURKB,TYMS,EZH2,CALR,SOX11,E2F7,PIF1,HIST1H1B,HIST2H2AB,HIST2H3D,HIST1H1C,EIF4EBP1,HIST1H2AD,ETV7,FOXM1,E2F1,HIST1H4J,BLM,HIST1H2AI,HIST1H2AG,HIST1H3J,DNMT1,STAT1,E2F2,HIST3H2A,PARP1,EPRS,CENPF,HDGF,HIST2H3C,HIST2H2AA,DKK1,MAGED1,HIST1H4H,HIST1H3D,HIST1H4C,PCNA,FOXC1…
GO:0043299	Leukocyte degranulation	35	506	0.4	0.00015	9606.ENSP00000215754,9606.ENSP00000219150,9606.ENSP00000236147,9606.ENSP00000236671,9606.ENSP00000250092,9606.ENSP00000260118,9606.ENSP00000261267,9606.ENSP00000262428,9606.ENSP00000262629,9606.ENSP00000271638,9606.ENSP00000289902,9606.ENSP00000291568,9606.ENSP00000296370,9606.ENSP00000320171,9606.ENSP00000339001,9606.ENSP00000339328,9606.ENSP00000344829,9606.ENSP00000345672,9606.ENSP00000354532,…	MIF,CORO1A,SELL,CTSD,CD68,GGH,LYZ,COTL1,TYROBP,S100A11,FCER1G,CSTB,S100P,PKM,TUBB,PLAUR,QPCT,CTSB,PNP,ILF2,S100A7,S100A8,S100A9,CTSS,MMP9,PLAU,LCN2,HLA-C,CKAP4,PRDX4,CALML5,HLA-B,CLEC5A,ADAM8,ITGAX
GO:0043312	Neutrophil degranulation	34	484	0.41	0.00015	9606.ENSP00000215754,9606.ENSP00000236147,9606.ENSP00000236671,9606.ENSP00000250092,9606.ENSP00000260118,9606.ENSP00000261267,9606.ENSP00000262428,9606.ENSP00000262629,9606.ENSP00000271638,9606.ENSP00000289902,9606.ENSP00000291568,9606.ENSP00000296370,9606.ENSP00000320171,9606.ENSP00000339001,9606.ENSP00000339328,9606.ENSP00000344829,9606.ENSP00000345672,9606.ENSP00000354532,9606.ENSP00000355011,…	MIF,SELL,CTSD,CD68,GGH,LYZ,COTL1,TYROBP,S100A11,FCER1G,CSTB,S100P,PKM,TUBB,PLAUR,QPCT,CTSB,PNP,ILF2,S100A7,S100A8,S100A9,CTSS,MMP9,PLAU,LCN2,HLA-C,CKAP4,PRDX4,CALML5,HLA-B,CLEC5A,ADAM8,ITGAX
GO:0060333	Interferon-gamma-mediated signaling pathway	12	70	0.79	0.00016	9606.ENSP00000228928,9606.ENSP00000257570,9606.ENSP00000264832,9606.ENSP00000342278,9606.ENSP00000354394,9606.ENSP00000358165,9606.ENSP00000364076,9606.ENSP00000364080,9606.ENSP00000365402,9606.ENSP00000378786,9606.ENSP00000384886,9606.ENSP00000399168	OAS3,OASL,ICAM1,OAS2,STAT1,FCGR1A,HLA-DQA2,HLA-DQB1,HLA-C,HLA-DRA,IFI30,HLA-B
GO:0031507	Heterochromatin assembly	11	58	0.84	0.00018	9606.ENSP00000333277,9606.ENSP00000347168,9606.ENSP00000352252,9606.ENSP00000358154,9606.ENSP00000366956,9606.ENSP00000366999,9606.ENSP00000367034,9606.ENSP00000377601,9606.ENSP00000385479,9606.ENSP00000399888,9606.ENSP00000418915	HIST2H3D,HIST1H4J,HIST1H3J,HIST2H3C,HIST1H4H,HIST1H3D,HIST1H4C,HELLS,HIST2H3A,HMGA1,CDKN2A
GO:0034340	Response to type i interferon	12	72	0.78	0.00021	9606.ENSP00000228928,9606.ENSP00000257570,9606.ENSP00000306565,9606.ENSP00000333667,9606.ENSP00000342278,9606.ENSP00000342513,9606.ENSP00000354394,9606.ENSP00000358997,9606.ENSP00000365402,9606.ENSP00000368699,9606.ENSP00000371471,9606.ENSP00000399168	OAS3,OASL,ISG20,SHMT2,OAS2,IFI6,STAT1,IRAK1,HLA-C,ISG15,RSAD2,HLA-B
GO:0031055	Chromatin remodeling at centromere	10	48	0.88	0.00025	9606.ENSP00000281453,9606.ENSP00000335463,9606.ENSP00000336868,9606.ENSP00000347168,9606.ENSP00000357308,9606.ENSP00000366956,9606.ENSP00000367034,9606.ENSP00000377007,9606.ENSP00000377601,9606.ENSP00000414109	CENPU,CASC5,CENPA,HIST1H4J,CENPW,HIST1H4H,HIST1H4C,CENPN,HELLS,HJURP
GO:0060255	Regulation of macromolecule metabolic process	228	6407	0.11	0.00026	9606.ENSP00000166345,9606.ENSP00000209728,9606.ENSP00000215754,9606.ENSP00000216117,9606.ENSP00000216127,9606.ENSP00000216341,9606.ENSP00000216911,9606.ENSP00000217026,9606.ENSP00000217086,9606.ENSP00000218230,9606.ENSP00000225655,9606.ENSP00000225964,9606.ENSP00000226279,9606.ENSP00000228843,9606.ENSP00000228928,9606.ENSP00000229239,9606.ENSP00000230321,9606.ENSP00000233893,9606.ENSP00000236671,…	TRIP13,CDC6,MIF,HMOX1,RASD2,GZMB,AURKA,MYBL2,SALL4,PCSK1N,PFN1,COL1A1,CD38,RAD51AP1,OAS3,GAPDH,MDFI,HSPE1,CTSD,PFN2,INHBA,HIST1H1D,HIST1H1A,SOX4,DLGAP5,WISP1,NUP210,CCNB1,ADAM19,OASL,ESPL1,IGF2BP3,BRIP1,SULF1,CDK2AP1,PKMYT1,IL12RB2,TYROBP,CCNE1,PRDX1,E2F3,EPCAM,POLQ,CD80,UBE2S,ICAM1,CENPE,PITX1,TFEC,GAL,DBF4,ARNTL2,S100A11,HES6,CCNA2,NFKBIE,CCT5,OTX1,THY1,UCHL1,SAMSN1,ATAD2,CCNB2,FCER1G,CSTB,EN1,…
GO:0031327	Negative regulation of cellular biosynthetic process	76	1592	0.24	0.00029	9606.ENSP00000209728,9606.ENSP00000216341,9606.ENSP00000217086,9606.ENSP00000226279,9606.ENSP00000229239,9606.ENSP00000230321,9606.ENSP00000244534,9606.ENSP00000258729,9606.ENSP00000262643,9606.ENSP00000262904,9606.ENSP00000265340,9606.ENSP00000265440,9606.ENSP00000271638,9606.ENSP00000272937,9606.ENSP00000295206,9606.ENSP00000296417,9606.ENSP00000296503,9606.ENSP00000300093,9606.ENSP00000301633,…	CDC6,GZMB,SALL4,CD38,GAPDH,MDFI,HIST1H1D,IGF2BP3,CCNE1,E2F3,PITX1,TFEC,S100A11,HES6,EN1,H2AFZ,HMGB2,PLK1,BIRC5,MRPL13,HIST1H1E,CBX2,AURKB,TYMS,EZH2,CALR,SOX11,E2F7,PIF1,HIST1H1B,HIST2H2AB,HIST2H3D,HIST1H1C,EIF4EBP1,HIST1H2AD,ETV7,FOXM1,E2F1,HIST1H4J,BLM,HIST1H2AI,HIST1H2AG,HIST1H3J,DNMT1,STAT1,E2F2,HIST3H2A,PARP1,EPRS,CENPF,HDGF,HIST2H3C,HIST2H2AA,DKK1,MAGED1,HIST1H4H,HIST1H3D,HIST1H4C,PCNA,FOXC1…
GO:1902969	Mitotic dna replication	6	11	1.3	0.0003	9606.ENSP00000262105,9606.ENSP00000264156,9606.ENSP00000265056,9606.ENSP00000372088,9606.ENSP00000405726,9606.ENSP00000480987	MCM4,MCM6,MCM2,RAD51,CDC45,MCM3
GO:0072395	Signal transduction involved in cell cycle checkpoint	12	76	0.76	0.00033	9606.ENSP00000216911,9606.ENSP00000244745,9606.ENSP00000256442,9606.ENSP00000300093,9606.ENSP00000321656,9606.ENSP00000322568,9606.ENSP00000323246,9606.ENSP00000345571,9606.ENSP00000355958,9606.ENSP00000368458,9606.ENSP00000378699,9606.ENSP00000481103	AURKA,SOX4,CCNB1,PLK1,CDC25C,SOX11,E2F7,E2F1,DTL,PCNA,CDK1,E2F8
GO:0032963	Collagen metabolic process	11	63	0.8	0.00036	9606.ENSP00000215743,9606.ENSP00000225964,9606.ENSP00000236671,9606.ENSP00000260227,9606.ENSP00000260302,9606.ENSP00000322788,9606.ENSP00000345672,9606.ENSP00000357981,9606.ENSP00000361405,9606.ENSP00000362304,9606.ENSP00000434412	MMP11,COL1A1,CTSD,MMP7,MMP13,MMP1,CTSB,CTSS,MMP9,ADAMTS14,SERPINH1
GO:0090329	Regulation of dna-dependent dna replication	10	51	0.85	0.00039	9606.ENSP00000265728,9606.ENSP00000301019,9606.ENSP00000322180,9606.ENSP00000323246,9606.ENSP00000347232,9606.ENSP00000368458,9606.ENSP00000376272,9606.ENSP00000393139,9606.ENSP00000450607,9606.ENSP00000481103	DBF4,CDT1,DSCC1,E2F7,BLM,PCNA,RFC4,CDC7,TIMELESS,E2F8
GO:0045321	Leukocyte activation	51	929	0.3	0.0004	9606.ENSP00000215754,9606.ENSP00000219150,9606.ENSP00000236147,9606.ENSP00000236671,9606.ENSP00000244745,9606.ENSP00000250092,9606.ENSP00000260118,9606.ENSP00000261267,9606.ENSP00000262428,9606.ENSP00000262629,9606.ENSP00000262746,9606.ENSP00000264832,9606.ENSP00000271638,9606.ENSP00000284878,9606.ENSP00000289707,9606.ENSP00000289902,9606.ENSP00000291568,9606.ENSP00000296370,9606.ENSP00000302569,…	MIF,CORO1A,SELL,CTSD,SOX4,CD68,GGH,LYZ,COTL1,TYROBP,PRDX1,ICAM1,S100A11,CXADR,SLAMF8,FCER1G,CSTB,S100P,CLEC7A,CXCL8,PKM,CD86,TUBB,PLAUR,QPCT,CTSB,PNP,ILF2,EXO1,S100A7,S100A8,S100A9,CTSS,MMP9,EDN2,CTPS1,PLAU,LCN2,HLA-C,UBD,CKAP4,PRDX4,CALML5,RSAD2,HELLS,LCP1,HLA-B,MS4A1,CLEC5A,ADAM8,ITGAX
GO:0051255	Spindle midzone assembly	6	12	1.26	0.00042	9606.ENSP00000260363,9606.ENSP00000313950,9606.ENSP00000363524,9606.ENSP00000377793,9606.ENSP00000378295,9606.ENSP00000404190	KIF23,AURKB,KIF4A,PRC1,INCENP,RACGAP1
GO:0044774	Mitotic dna integrity checkpoint	14	109	0.67	0.00046	9606.ENSP00000209728,9606.ENSP00000216911,9606.ENSP00000244745,9606.ENSP00000256442,9606.ENSP00000312995,9606.ENSP00000321656,9606.ENSP00000323246,9606.ENSP00000345571,9606.ENSP00000347232,9606.ENSP00000360623,9606.ENSP00000368458,9606.ENSP00000378699,9606.ENSP00000411532,9606.ENSP00000481103	CDC6,AURKA,SOX4,CCNB1,CLSPN,CDC25C,E2F7,E2F1,BLM,ORC1,PCNA,CDK1,TOP2A,E2F8
GO:0002274	Myeloid leukocyte activation	37	585	0.36	0.00047	9606.ENSP00000215754,9606.ENSP00000236147,9606.ENSP00000236671,9606.ENSP00000250092,9606.ENSP00000260118,9606.ENSP00000261267,9606.ENSP00000262428,9606.ENSP00000262629,9606.ENSP00000271638,9606.ENSP00000289902,9606.ENSP00000291568,9606.ENSP00000296370,9606.ENSP00000306512,9606.ENSP00000320171,9606.ENSP00000339001,9606.ENSP00000339328,9606.ENSP00000344829,9606.ENSP00000345672,9606.ENSP00000354532,…	MIF,SELL,CTSD,CD68,GGH,LYZ,COTL1,TYROBP,S100A11,FCER1G,CSTB,S100P,CXCL8,PKM,TUBB,PLAUR,QPCT,CTSB,PNP,ILF2,S100A7,S100A8,S100A9,CTSS,MMP9,EDN2,PLAU,LCN2,HLA-C,UBD,CKAP4,PRDX4,CALML5,HLA-B,CLEC5A,ADAM8,ITGAX
GO:0019730	Antimicrobial humoral response	17	160	0.59	0.00049	9606.ENSP00000229239,9606.ENSP00000261267,9606.ENSP00000286758,9606.ENSP00000305651,9606.ENSP00000306512,9606.ENSP00000306884,9606.ENSP00000321744,9606.ENSP00000349430,9606.ENSP00000351671,9606.ENSP00000354901,9606.ENSP00000357712,9606.ENSP00000357722,9606.ENSP00000357727,9606.ENSP00000358151,9606.ENSP00000362108,9606.ENSP00000369317,9606.ENSP00000476136	GAPDH,LYZ,CXCL13,CXCL10,CXCL8,CXCL11,HIST1H2BC,HIST1H2BK,CCL20,CXCL9,S100A7,S100A8,S100A9,HIST2H2BE,LCN2,KRT6A,HIST1H2BJ
GO:0034645	Cellular macromolecule biosynthetic process	75	1592	0.23	0.0005	9606.ENSP00000166345,9606.ENSP00000209728,9606.ENSP00000216122,9606.ENSP00000221486,9606.ENSP00000242208,9606.ENSP00000248958,9606.ENSP00000256442,9606.ENSP00000258729,9606.ENSP00000259008,9606.ENSP00000260102,9606.ENSP00000261692,9606.ENSP00000262105,9606.ENSP00000262643,9606.ENSP00000262904,9606.ENSP00000264156,9606.ENSP00000264233,9606.ENSP00000265056,9606.ENSP00000265728,9606.ENSP00000272348,…	TRIP13,CDC6,MCM5,RNASEH2A,INHBA,SDF2L1,CCNB1,IGF2BP3,BRIP1,MRPL15,CDK2AP1,MCM4,CCNE1,E2F3,MCM6,POLQ,MCM2,DBF4,SNRPG,RPL39L,KIAA0101,CDT1,CHAF1A,TK1,FEN1,MRPL13,RMI2,CLSPN,TYMS,GEN1,DSCC1,BGN,PIF1,LIN9,EIF4EBP1,ETV7,E2F1,HIST1H4J,BLM,RRM2,WDHD1,ILF2,E2F2,EXO1,PARP1,EPRS,CENPF,DTL,ORC1,MRPL14,HIST1H4H,HIST1H4C,PCNA,ISG15,RAD51,RFC4,PTTG1,CDK1,MUC16,MRPS12,TONSL,NCAPG2,ACAN,CDC7,SMARCA4,HMGA1,CDC45,…
GO:0006336	DNA replication-independent nucleosome assembly	10	53	0.84	0.00051	9606.ENSP00000263382,9606.ENSP00000281453,9606.ENSP00000335463,9606.ENSP00000336868,9606.ENSP00000347168,9606.ENSP00000357308,9606.ENSP00000366956,9606.ENSP00000367034,9606.ENSP00000377007,9606.ENSP00000414109	ASF1B,CENPU,CASC5,CENPA,HIST1H4J,CENPW,HIST1H4H,HIST1H4C,CENPN,HJURP
GO:0006275	Regulation of dna replication	14	111	0.66	0.00054	9606.ENSP00000209728,9606.ENSP00000265728,9606.ENSP00000271638,9606.ENSP00000274026,9606.ENSP00000301019,9606.ENSP00000322180,9606.ENSP00000323246,9606.ENSP00000347232,9606.ENSP00000368458,9606.ENSP00000376272,9606.ENSP00000378699,9606.ENSP00000393139,9606.ENSP00000450607,9606.ENSP00000481103	CDC6,DBF4,S100A11,CCNA2,CDT1,DSCC1,E2F7,BLM,PCNA,RFC4,CDK1,CDC7,TIMELESS,E2F8
GO:0051101	Regulation of dna binding	15	128	0.63	0.00057	9606.ENSP00000216117,9606.ENSP00000230321,9606.ENSP00000275517,9606.ENSP00000296503,9606.ENSP00000301019,9606.ENSP00000322568,9606.ENSP00000337060,9606.ENSP00000339328,9606.ENSP00000345571,9606.ENSP00000355759,9606.ENSP00000355966,9606.ENSP00000361405,9606.ENSP00000370256,9606.ENSP00000414109,9606.ENSP00000432218	HMOX1,MDFI,CDCA5,HMGB2,CDT1,SOX11,NME1,PLAUR,E2F1,PARP1,NEK2,MMP9,FOXC1,HJURP,IL32
GO:0051988	Regulation of attachment of spindle microtubules to kinetochore	6	13	1.22	0.00057	9606.ENSP00000256442,9606.ENSP00000313950,9606.ENSP00000323300,9606.ENSP00000355966,9606.ENSP00000364585,9606.ENSP00000404190	CCNB1,AURKB,SPAG5,NEK2,RCC2,RACGAP1
GO:0060337	Type i interferon signaling pathway	11	67	0.78	0.00057	9606.ENSP00000228928,9606.ENSP00000257570,9606.ENSP00000306565,9606.ENSP00000342278,9606.ENSP00000342513,9606.ENSP00000354394,9606.ENSP00000358997,9606.ENSP00000365402,9606.ENSP00000368699,9606.ENSP00000371471,9606.ENSP00000399168	OAS3,OASL,ISG20,OAS2,IFI6,STAT1,IRAK1,HLA-C,ISG15,RSAD2,HLA-B
GO:0000723	Telomere maintenance	14	112	0.66	0.00058	9606.ENSP00000262643,9606.ENSP00000305480,9606.ENSP00000328174,9606.ENSP00000347168,9606.ENSP00000347232,9606.ENSP00000355506,9606.ENSP00000355759,9606.ENSP00000366956,9606.ENSP00000367034,9606.ENSP00000368458,9606.ENSP00000372088,9606.ENSP00000376272,9606.ENSP00000429089,9606.ENSP00000482313	CCNE1,FEN1,PIF1,HIST1H4J,BLM,EXO1,PARP1,HIST1H4H,HIST1H4C,PCNA,RAD51,RFC4,CCNE2,RECQL4
GO:0061844	Antimicrobial humoral immune response mediated by antimicrobial peptide	14	113	0.65	0.00063	9606.ENSP00000229239,9606.ENSP00000286758,9606.ENSP00000305651,9606.ENSP00000306512,9606.ENSP00000306884,9606.ENSP00000321744,9606.ENSP00000349430,9606.ENSP00000351671,9606.ENSP00000354901,9606.ENSP00000357712,9606.ENSP00000357727,9606.ENSP00000358151,9606.ENSP00000369317,9606.ENSP00000476136	GAPDH,CXCL13,CXCL10,CXCL8,CXCL11,HIST1H2BC,HIST1H2BK,CCL20,CXCL9,S100A7,S100A9,HIST2H2BE,KRT6A,HIST1H2BJ
GO:0030574	Collagen catabolic process	9	43	0.88	0.00068	9606.ENSP00000215743,9606.ENSP00000236671,9606.ENSP00000260227,9606.ENSP00000260302,9606.ENSP00000322788,9606.ENSP00000345672,9606.ENSP00000357981,9606.ENSP00000361405,9606.ENSP00000362304	MMP11,CTSD,MMP7,MMP13,MMP1,CTSB,CTSS,MMP9,ADAMTS14
GO:0034080	CENP-A containing nucleosome assembly	9	43	0.88	0.00068	9606.ENSP00000281453,9606.ENSP00000335463,9606.ENSP00000336868,9606.ENSP00000347168,9606.ENSP00000357308,9606.ENSP00000366956,9606.ENSP00000367034,9606.ENSP00000377007,9606.ENSP00000414109	CENPU,CASC5,CENPA,HIST1H4J,CENPW,HIST1H4H,HIST1H4C,CENPN,HJURP
GO:0006267	Pre-replicative complex assembly involved in nuclear cell cycle dna replication	5	7	1.41	0.0007	9606.ENSP00000216122,9606.ENSP00000262105,9606.ENSP00000264156,9606.ENSP00000265056,9606.ENSP00000480987	MCM5,MCM4,MCM6,MCM2,MCM3
GO:0009059	Macromolecule biosynthetic process	76	1643	0.23	0.00073	9606.ENSP00000166345,9606.ENSP00000209728,9606.ENSP00000216122,9606.ENSP00000221486,9606.ENSP00000242208,9606.ENSP00000248958,9606.ENSP00000256442,9606.ENSP00000258729,9606.ENSP00000259008,9606.ENSP00000260102,9606.ENSP00000261692,9606.ENSP00000262105,9606.ENSP00000262643,9606.ENSP00000262904,9606.ENSP00000264156,9606.ENSP00000264233,9606.ENSP00000265056,9606.ENSP00000265728,9606.ENSP00000272348,…	TRIP13,CDC6,MCM5,RNASEH2A,INHBA,SDF2L1,CCNB1,IGF2BP3,BRIP1,MRPL15,CDK2AP1,MCM4,CCNE1,E2F3,MCM6,POLQ,MCM2,DBF4,SNRPG,RPL39L,KIAA0101,CDT1,CHAF1A,TK1,FEN1,MRPL13,RMI2,CLSPN,TYMS,GEN1,DSCC1,BGN,PIF1,LIN9,EIF4EBP1,ETV7,E2F1,HIST1H4J,BLM,RRM2,WDHD1,ILF2,E2F2,EXO1,PARP1,EPRS,CENPF,DTL,ORC1,MRPL14,HIST1H4H,HIST1H4C,PCNA,ISG15,SDC1,RAD51,RFC4,PTTG1,CDK1,MUC16,MRPS12,TONSL,NCAPG2,ACAN,CDC7,SMARCA4,HMGA1,C…
GO:0002366	Leukocyte activation involved in immune response	38	626	0.34	0.00077	9606.ENSP00000215754,9606.ENSP00000219150,9606.ENSP00000236147,9606.ENSP00000236671,9606.ENSP00000250092,9606.ENSP00000260118,9606.ENSP00000261267,9606.ENSP00000262428,9606.ENSP00000262629,9606.ENSP00000264832,9606.ENSP00000271638,9606.ENSP00000289902,9606.ENSP00000291568,9606.ENSP00000296370,9606.ENSP00000320171,9606.ENSP00000339001,9606.ENSP00000339328,9606.ENSP00000344829,9606.ENSP00000345672,…	MIF,CORO1A,SELL,CTSD,CD68,GGH,LYZ,COTL1,TYROBP,ICAM1,S100A11,FCER1G,CSTB,S100P,PKM,TUBB,PLAUR,QPCT,CTSB,PNP,ILF2,EXO1,S100A7,S100A8,S100A9,CTSS,MMP9,PLAU,LCN2,HLA-C,CKAP4,PRDX4,CALML5,LCP1,HLA-B,CLEC5A,ADAM8,ITGAX
GO:0045910	Negative regulation of dna recombination	9	44	0.87	0.00077	9606.ENSP00000244534,9606.ENSP00000244573,9606.ENSP00000264233,9606.ENSP00000307705,9606.ENSP00000310356,9606.ENSP00000330074,9606.ENSP00000339566,9606.ENSP00000347232,9606.ENSP00000381378	HIST1H1D,HIST1H1A,POLQ,HIST1H1E,RMI2,HIST1H1B,HIST1H1C,BLM,FANCB
GO:0051338	Regulation of transferase activity	54	1036	0.28	0.00077	9606.ENSP00000209728,9606.ENSP00000215754,9606.ENSP00000256442,9606.ENSP00000262300,9606.ENSP00000262643,9606.ENSP00000264552,9606.ENSP00000265148,9606.ENSP00000265728,9606.ENSP00000274026,9606.ENSP00000284240,9606.ENSP00000284440,9606.ENSP00000288207,9606.ENSP00000289707,9606.ENSP00000296509,9606.ENSP00000300093,9606.ENSP00000300403,9606.ENSP00000303634,9606.ENSP00000303706,9606.ENSP00000305651,…	CDC6,MIF,CCNB1,PKMYT1,CCNE1,UBE2S,CENPE,DBF4,CCNA2,THY1,UCHL1,CCNB2,SLAMF8,MAD2L1,PLK1,TPX2,LRP8,CDC25A,CXCL10,CKS1B,CLSPN,AURKB,EZH2,CDC25C,DSCC1,PIF1,CD86,EPHB3,CDKN3,BLM,UBE2C,IQGAP3,NEK2,KIF14,FCGR1A,PSRC1,IRAK1,CDC20,DKK1,MAGED1,CKS2,PCNA,RFC4,MST4,INCENP,CDK1,CXCR4,NCAPG2,CDKN2A,PBK,CCNE2,ADAM8,DBNDD1,GREM1
GO:0051171	Regulation of nitrogen compound metabolic process	208	5836	0.11	0.00082	9606.ENSP00000166345,9606.ENSP00000209728,9606.ENSP00000215754,9606.ENSP00000216117,9606.ENSP00000216127,9606.ENSP00000216341,9606.ENSP00000216911,9606.ENSP00000217026,9606.ENSP00000217086,9606.ENSP00000218230,9606.ENSP00000225655,9606.ENSP00000225964,9606.ENSP00000226279,9606.ENSP00000228843,9606.ENSP00000228928,9606.ENSP00000229239,9606.ENSP00000230321,9606.ENSP00000233893,9606.ENSP00000236671,…	TRIP13,CDC6,MIF,HMOX1,RASD2,GZMB,AURKA,MYBL2,SALL4,PCSK1N,PFN1,COL1A1,CD38,RAD51AP1,OAS3,GAPDH,MDFI,HSPE1,CTSD,PFN2,INHBA,HIST1H1D,HIST1H1A,SOX4,DLGAP5,NUP210,CCNB1,OASL,ESPL1,IGF2BP3,BRIP1,CDK2AP1,PKMYT1,CCNE1,PRDX1,E2F3,EPCAM,POLQ,CD80,UBE2S,ICAM1,CENPE,PITX1,TFEC,GAL,DBF4,ARNTL2,HES6,CCNA2,NFKBIE,CCT5,OTX1,THY1,UCHL1,SAMSN1,ATAD2,CCNB2,CSTB,EN1,CCT3,H2AFZ,HMGB2,MAD2L1,RAD21,A2ML1,PLK1,TPX2,CDT…
GO:0000086	G2/M transition of mitotic cell cycle	15	134	0.61	0.00086	9606.ENSP00000216911,9606.ENSP00000256442,9606.ENSP00000262300,9606.ENSP00000270861,9606.ENSP00000274026,9606.ENSP00000288207,9606.ENSP00000298048,9606.ENSP00000300093,9606.ENSP00000301633,9606.ENSP00000303706,9606.ENSP00000321656,9606.ENSP00000339001,9606.ENSP00000342307,9606.ENSP00000355966,9606.ENSP00000378699	AURKA,CCNB1,PKMYT1,PLK4,CCNA2,CCNB2,MELK,PLK1,BIRC5,CDC25A,CDC25C,TUBB,FOXM1,NEK2,CDK1
GO:0022411	Cellular component disassembly	28	395	0.41	0.00086	9606.ENSP00000215743,9606.ENSP00000256442,9606.ENSP00000260102,9606.ENSP00000260227,9606.ENSP00000260302,9606.ENSP00000263181,9606.ENSP00000288207,9606.ENSP00000296503,9606.ENSP00000300093,9606.ENSP00000306548,9606.ENSP00000322788,9606.ENSP00000355656,9606.ENSP00000357981,9606.ENSP00000361084,9606.ENSP00000361298,9606.ENSP00000361405,9606.ENSP00000363081,9606.ENSP00000378699,9606.ENSP00000381581,…	MMP11,CCNB1,MRPL15,MMP7,MMP13,KIF18A,CCNB2,HMGB2,PLK1,MRPL13,MMP1,HIST3H2A,CTSS,MRPL14,KIF2C,MMP9,DKK1,CDK1,LCP1,MRPS12,SMARCA4,HMGA1,STMN1,TOP2A,CDKN2A,CFL1,ADAM8,KIF18B
GO:0045840	Positive regulation of mitotic nuclear division	10	58	0.8	0.00092	9606.ENSP00000216911,9606.ENSP00000247191,9606.ENSP00000257934,9606.ENSP00000275517,9606.ENSP00000301019,9606.ENSP00000301633,9606.ENSP00000313950,9606.ENSP00000348838,9606.ENSP00000401564,9606.ENSP00000453403	AURKA,DLGAP5,ESPL1,CDCA5,CDT1,BIRC5,AURKB,UBE2C,RANBP1,NUSAP1
GO:0002682	Regulation of immune system process	71	1514	0.23	0.00093	9606.ENSP00000215754,9606.ENSP00000215794,9606.ENSP00000216117,9606.ENSP00000219150,9606.ENSP00000225964,9606.ENSP00000226279,9606.ENSP00000236147,9606.ENSP00000242208,9606.ENSP00000244745,9606.ENSP00000250092,9606.ENSP00000262629,9606.ENSP00000264246,9606.ENSP00000264832,9606.ENSP00000265643,9606.ENSP00000274793,9606.ENSP00000284240,9606.ENSP00000284878,9606.ENSP00000285670,9606.ENSP00000286758,…	MIF,USP18,HMOX1,CORO1A,COL1A1,CD38,SELL,INHBA,SOX4,CD68,TYROBP,CD80,ICAM1,GAL,PLA2G7,THY1,CXADR,SAMSN1,CXCL13,SLAMF8,FCER1G,HMGB2,CLEC7A,LRP8,CTLA4,CXCL10,CXCL8,CALR,SOX11,CD86,HIST2H3D,NME1,FPR3,HIST1H4J,CCL20,HIST1H3J,STAT1,PNP,FCGR3A,S100A7,HIST2H3C,FCGR1A,HMGB3,GBP5,EDN2,HLA-DQA2,HLA-DQB1,HLA-C,HIST1H4H,HIST1H3D,HIST1H4C,ISG15,FOXC1,RSAD2,FANCA,LILRB4,HLA-DRA,MUC16,PPAPDC1A,RUNX3,HIST2H3A,NCA…
GO:0009617	Response to bacterium	38	634	0.34	0.00097	9606.ENSP00000250092,9606.ENSP00000256722,9606.ENSP00000259938,9606.ENSP00000261267,9606.ENSP00000262345,9606.ENSP00000264246,9606.ENSP00000264832,9606.ENSP00000276708,9606.ENSP00000286758,9606.ENSP00000289707,9606.ENSP00000289902,9606.ENSP00000296503,9606.ENSP00000305651,9606.ENSP00000306512,9606.ENSP00000306884,9606.ENSP00000321744,9606.ENSP00000332049,9606.ENSP00000341610,9606.ENSP00000342278,…	CD68,CMPK2,CLPS,LYZ,IL12RB2,CD80,ICAM1,GSDMC,CXCL13,SLAMF8,FCER1G,HMGB2,CXCL10,CXCL8,CXCL11,HIST1H2BC,CD86,C15orf48,OAS2,HIST1H2BK,CCL20,CXCL9,RGS1,S100A7,S100A8,S100A9,HIST2H2BE,IRAK1,GBP5,LCN2,ISG15,KRT6A,GJB2,HLA-B,OCIAD2,IDO1,MS4A1,HIST1H2BJ
GO:0051172	Negative regulation of nitrogen compound metabolic process	102	2429	0.18	0.00099	9606.ENSP00000215754,9606.ENSP00000216127,9606.ENSP00000216341,9606.ENSP00000217086,9606.ENSP00000218230,9606.ENSP00000226279,9606.ENSP00000229239,9606.ENSP00000230321,9606.ENSP00000244534,9606.ENSP00000244573,9606.ENSP00000244745,9606.ENSP00000256442,9606.ENSP00000258729,9606.ENSP00000262643,9606.ENSP00000262904,9606.ENSP00000264233,9606.ENSP00000265340,9606.ENSP00000265440,9606.ENSP00000272937,…	MIF,RASD2,GZMB,SALL4,PCSK1N,CD38,GAPDH,MDFI,HIST1H1D,HIST1H1A,SOX4,CCNB1,IGF2BP3,CCNE1,E2F3,POLQ,PITX1,TFEC,HES6,THY1,UCHL1,SAMSN1,CSTB,EN1,H2AFZ,HMGB2,MAD2L1,A2ML1,PLK1,BIRC5,CST1,MRPL13,HIST1H1E,CBX2,PPP1R14B,RMI2,AURKB,TYMS,EZH2,CALR,SOX11,E2F7,PIF1,HIST1H1B,HIST2H2AB,HIST2H3D,PLAUR,HIST1H1C,EIF4EBP1,HIST1H2AD,ETV7,FOXM1,IFI6,E2F1,HIST1H4J,BLM,HIST1H2AI,HIST1H2AG,HIST1H3J,DNMT1,STAT1,E2F2,PPP1…
GO:0006807	Nitrogen compound metabolic process	237	6852	0.1	0.001	9606.ENSP00000005286,9606.ENSP00000166345,9606.ENSP00000209728,9606.ENSP00000215743,9606.ENSP00000215794,9606.ENSP00000216117,9606.ENSP00000216122,9606.ENSP00000216341,9606.ENSP00000216911,9606.ENSP00000218230,9606.ENSP00000221486,9606.ENSP00000222271,9606.ENSP00000228843,9606.ENSP00000228928,9606.ENSP00000229239,9606.ENSP00000229270,9606.ENSP00000236671,9606.ENSP00000240488,9606.ENSP00000242208,…	TMEM132A,TRIP13,CDC6,MMP11,USP18,HMOX1,MCM5,GZMB,AURKA,PCSK1N,RNASEH2A,COMP,RAD51AP1,OAS3,GAPDH,TPI1,CTSD,MND1,INHBA,DDX39A,HIST1H1D,SDF2L1,NUP210,ADAMDEC1,CCNB1,CMPK2,ADAM19,ESPL1,IGF2BP3,BRIP1,MRPL15,GGH,SULF1,MMP7,MMP13,LYZ,MCM4,PKMYT1,IL12RB2,CCNE1,E2F3,MCM6,POLQ,UBE2S,NEIL3,MCM2,PLK4,SNRPG,CCNA2,PLA2G7,CDCA5,ST14,THY1,UCHL1,BUB1B,HIST1H2BD,RPL39L,HMGB2,MAD2L1,RAD21,MELK,KIAA0101,PLK1,CHAF1A,…
GO:0030199	Collagen fibril organization	9	46	0.85	0.001	9606.ENSP00000215743,9606.ENSP00000222271,9606.ENSP00000225964,9606.ENSP00000359114,9606.ENSP00000362304,9606.ENSP00000370256,9606.ENSP00000387356,9606.ENSP00000434412,9606.ENSP00000478319	MMP11,COMP,COL1A1,COL11A1,ADAMTS14,FOXC1,ACAN,SERPINH1,GREM1
GO:0043486	Histone exchange	10	59	0.79	0.001	9606.ENSP00000281453,9606.ENSP00000335463,9606.ENSP00000336868,9606.ENSP00000347168,9606.ENSP00000357308,9606.ENSP00000366956,9606.ENSP00000367034,9606.ENSP00000377007,9606.ENSP00000414109,9606.ENSP00000463154	CENPU,CASC5,CENPA,HIST1H4J,CENPW,HIST1H4H,HIST1H4C,CENPN,HJURP,ANP32E
GO:0051256	Mitotic spindle midzone assembly	5	8	1.36	0.001	9606.ENSP00000260363,9606.ENSP00000313950,9606.ENSP00000363524,9606.ENSP00000377793,9606.ENSP00000404190	KIF23,AURKB,KIF4A,PRC1,RACGAP1
GO:0008283	Cell population proliferation	32	493	0.37	0.0011	9606.ENSP00000216117,9606.ENSP00000217086,9606.ENSP00000222271,9606.ENSP00000244745,9606.ENSP00000262746,9606.ENSP00000284440,9606.ENSP00000298048,9606.ENSP00000302530,9606.ENSP00000303706,9606.ENSP00000304078,9606.ENSP00000311083,9606.ENSP00000313950,9606.ENSP00000321656,9606.ENSP00000322568,9606.ENSP00000326550,9606.ENSP00000354394,9606.ENSP00000356319,9606.ENSP00000356379,9606.ENSP00000357643,…	HMOX1,SALL4,COMP,SOX4,PRDX1,UCHL1,MELK,BUB1,CDC25A,FAM83B,CKS1B,AURKB,CDC25C,SOX11,TACC3,STAT1,KIF14,ASPM,MKI67,CTPS1,CKS2,FOXC1,HELLS,CDK1,NCAPG2,ARTN,RACGAP1,MCM10,MS4A1,KIF1A,E2F8,FAM83D
GO:0030593	Neutrophil chemotaxis	11	74	0.73	0.0011	9606.ENSP00000284878,9606.ENSP00000286758,9606.ENSP00000289902,9606.ENSP00000305651,9606.ENSP00000306512,9606.ENSP00000306884,9606.ENSP00000351671,9606.ENSP00000354901,9606.ENSP00000357722,9606.ENSP00000357727,9606.ENSP00000361668	CXADR,CXCL13,FCER1G,CXCL10,CXCL8,CXCL11,CCL20,CXCL9,S100A8,S100A9,EDN2
GO:0044093	Positive regulation of molecular function	82	1842	0.21	0.0011	9606.ENSP00000209728,9606.ENSP00000215754,9606.ENSP00000225655,9606.ENSP00000233893,9606.ENSP00000236671,9606.ENSP00000239940,9606.ENSP00000240423,9606.ENSP00000256442,9606.ENSP00000259938,9606.ENSP00000264552,9606.ENSP00000264832,9606.ENSP00000265036,9606.ENSP00000265148,9606.ENSP00000265643,9606.ENSP00000265728,9606.ENSP00000284240,9606.ENSP00000286758,9606.ENSP00000296503,9606.ENSP00000300093,…	CDC6,MIF,PFN1,HSPE1,CTSD,PFN2,NCAPH,CCNB1,CLPS,UBE2S,ICAM1,DEPDC1B,CENPE,GAL,DBF4,THY1,CXCL13,HMGB2,PLK1,TPX2,CDT1,CLEC7A,LRP8,CKS1B,CLSPN,AURKB,EZH2,DSCC1,PMAIP1,CTHRC1,CD86,EPHB3,NME1,PLAUR,FN1,UBE2C,CCL20,IQGAP3,ARHGAP11A,PARP1,NEK2,KIF14,RGS1,S100A8,S100A9,CTSS,RGS10,FCGR1A,PSRC1,IRAK1,MMP9,CDC20,EDN2,RTKN2,CLPSL1,DKK1,RCC2,BAMBI,MAGED1,CKS2,PCNA,FOXC1,RFC4,LLGL2,MST4,INCENP,CDK1,CXCR4,NCAPG2…
GO:0070507	Regulation of microtubule cytoskeleton organization	18	192	0.53	0.0011	9606.ENSP00000216911,9606.ENSP00000260731,9606.ENSP00000263181,9606.ENSP00000270861,9606.ENSP00000296484,9606.ENSP00000300093,9606.ENSP00000300403,9606.ENSP00000318977,9606.ENSP00000319417,9606.ENSP00000323300,9606.ENSP00000326550,9606.ENSP00000355966,9606.ENSP00000358925,9606.ENSP00000360944,9606.ENSP00000362937,9606.ENSP00000367276,9606.ENSP00000401564,9606.ENSP00000410452	AURKA,KIF11,KIF18A,PLK4,POC1A,PLK1,TPX2,GEN1,SKA3,SPAG5,TACC3,NEK2,PSRC1,STIL,RCC1,CKAP2,RANBP1,STMN1
GO:0000077	DNA damage checkpoint	15	140	0.59	0.0013	9606.ENSP00000216911,9606.ENSP00000244745,9606.ENSP00000256442,9606.ENSP00000259008,9606.ENSP00000300093,9606.ENSP00000312995,9606.ENSP00000321656,9606.ENSP00000323246,9606.ENSP00000345571,9606.ENSP00000347232,9606.ENSP00000355958,9606.ENSP00000368458,9606.ENSP00000378699,9606.ENSP00000434024,9606.ENSP00000481103	AURKA,SOX4,CCNB1,BRIP1,PLK1,CLSPN,CDC25C,E2F7,E2F1,BLM,DTL,PCNA,CDK1,H2AFX,E2F8
GO:0006725	Cellular aromatic compound metabolic process	116	2882	0.16	0.0013	9606.ENSP00000166345,9606.ENSP00000209728,9606.ENSP00000216117,9606.ENSP00000216122,9606.ENSP00000221486,9606.ENSP00000228843,9606.ENSP00000228928,9606.ENSP00000229239,9606.ENSP00000229270,9606.ENSP00000240488,9606.ENSP00000242776,9606.ENSP00000256442,9606.ENSP00000256722,9606.ENSP00000259008,9606.ENSP00000260118,9606.ENSP00000262105,9606.ENSP00000262643,9606.ENSP00000262904,9606.ENSP00000264156,…	TRIP13,CDC6,HMOX1,MCM5,RNASEH2A,RAD51AP1,OAS3,GAPDH,TPI1,MND1,DDX39A,CCNB1,CMPK2,BRIP1,GGH,MCM4,CCNE1,E2F3,MCM6,POLQ,NEIL3,MCM2,SQLE,SNRPG,CDCA5,HMGB2,RAD21,KIAA0101,CHAF1A,TK1,FEN1,ISG20,RMI2,FANCI,CLSPN,TYMS,GEN1,EZH2,PKM,APOBEC3B,PIF1,LIN9,IDH2,SHMT2,NME1,ETV7,OAS2,FOXM1,E2F1,CTSB,HIST1H4J,BLM,DNMT1,RRM2,WDHD1,PNP,ILF2,HORMAD1,E2F2,EXO1,HIST3H2A,PARP1,EPRS,CENPF,DTL,UBE2T,SLC16A10,HMGB3,ORC1,R…
GO:0007076	Mitotic chromosome condensation	6	16	1.13	0.0013	9606.ENSP00000240423,9606.ENSP00000251496,9606.ENSP00000275517,9606.ENSP00000325017,9606.ENSP00000349961,9606.ENSP00000453403	NCAPH,NCAPG,CDCA5,NCAPD2,SMC4,NUSAP1
GO:0019222	Regulation of metabolic process	239	6948	0.1	0.0013	9606.ENSP00000166345,9606.ENSP00000209728,9606.ENSP00000215754,9606.ENSP00000216117,9606.ENSP00000216127,9606.ENSP00000216341,9606.ENSP00000216911,9606.ENSP00000217026,9606.ENSP00000217086,9606.ENSP00000218230,9606.ENSP00000225655,9606.ENSP00000225964,9606.ENSP00000226279,9606.ENSP00000228843,9606.ENSP00000228928,9606.ENSP00000229239,9606.ENSP00000230321,9606.ENSP00000233893,9606.ENSP00000236671,…	TRIP13,CDC6,MIF,HMOX1,RASD2,GZMB,AURKA,MYBL2,SALL4,PCSK1N,PFN1,COL1A1,CD38,RAD51AP1,OAS3,GAPDH,MDFI,HSPE1,CTSD,PFN2,INHBA,HIST1H1D,HIST1H1A,SOX4,DLGAP5,WISP1,NUP210,CCNB1,ADAM19,OASL,ESPL1,IGF2BP3,BRIP1,SULF1,CDK2AP1,PKMYT1,IL12RB2,TYROBP,CCNE1,PRDX1,E2F3,EPCAM,POLQ,CD80,UBE2S,ICAM1,CENPE,PITX1,TFEC,GAL,DBF4,SQLE,ARNTL2,S100A11,HES6,CCNA2,NFKBIE,CCT5,OTX1,THY1,UCHL1,SAMSN1,ATAD2,CCNB2,SLAMF8,FCER…
GO:0031324	Negative regulation of cellular metabolic process	108	2630	0.17	0.0013	9606.ENSP00000209728,9606.ENSP00000215754,9606.ENSP00000216117,9606.ENSP00000216127,9606.ENSP00000216341,9606.ENSP00000217086,9606.ENSP00000218230,9606.ENSP00000226279,9606.ENSP00000229239,9606.ENSP00000230321,9606.ENSP00000242208,9606.ENSP00000244534,9606.ENSP00000244573,9606.ENSP00000244745,9606.ENSP00000256442,9606.ENSP00000258729,9606.ENSP00000262300,9606.ENSP00000262643,9606.ENSP00000262904,…	CDC6,MIF,HMOX1,RASD2,GZMB,SALL4,PCSK1N,CD38,GAPDH,MDFI,INHBA,HIST1H1D,HIST1H1A,SOX4,CCNB1,IGF2BP3,PKMYT1,CCNE1,E2F3,POLQ,PITX1,TFEC,S100A11,HES6,THY1,UCHL1,SAMSN1,CSTB,EN1,H2AFZ,HMGB2,MAD2L1,A2ML1,PLK1,BIRC5,CST1,MRPL13,HIST1H1E,CBX2,PPP1R14B,RMI2,AURKB,TYMS,EZH2,CALR,SOX11,E2F7,PIF1,HIST1H1B,HIST2H2AB,HIST2H3D,CASC5,PLAUR,HIST1H1C,EIF4EBP1,HIST1H2AD,ETV7,FOXM1,IFI6,E2F1,HIST1H4J,BLM,HIST1H2AI,HI…
GO:0051656	Establishment of organelle localization	27	385	0.41	0.0013	9606.ENSP00000247191,9606.ENSP00000256442,9606.ENSP00000257934,9606.ENSP00000260363,9606.ENSP00000261597,9606.ENSP00000263181,9606.ENSP00000265148,9606.ENSP00000271452,9606.ENSP00000275517,9606.ENSP00000284440,9606.ENSP00000296509,9606.ENSP00000300093,9606.ENSP00000301019,9606.ENSP00000301633,9606.ENSP00000336868,9606.ENSP00000355922,9606.ENSP00000356319,9606.ENSP00000358925,9606.ENSP00000361298,…	DLGAP5,CCNB1,ESPL1,KIF23,NDC80,KIF18A,CENPE,NUF2,CDCA5,UCHL1,MAD2L1,PLK1,CDT1,BIRC5,CENPA,CENPF,KIF14,PSRC1,KIF2C,CDCA8,LLGL2,INCENP,SAPCD2,KIFC1,KIF1A,NUSAP1,FAM83D
GO:0072422	Signal transduction involved in dna damage checkpoint	11	75	0.73	0.0013	9606.ENSP00000216911,9606.ENSP00000244745,9606.ENSP00000256442,9606.ENSP00000300093,9606.ENSP00000321656,9606.ENSP00000323246,9606.ENSP00000345571,9606.ENSP00000355958,9606.ENSP00000368458,9606.ENSP00000378699,9606.ENSP00000481103	AURKA,SOX4,CCNB1,PLK1,CDC25C,E2F7,E2F1,DTL,PCNA,CDK1,E2F8
GO:0042770	Signal transduction in response to dna damage	13	107	0.64	0.0014	9606.ENSP00000215754,9606.ENSP00000216911,9606.ENSP00000244745,9606.ENSP00000256442,9606.ENSP00000300093,9606.ENSP00000321656,9606.ENSP00000323246,9606.ENSP00000342307,9606.ENSP00000345571,9606.ENSP00000355958,9606.ENSP00000368458,9606.ENSP00000378699,9606.ENSP00000481103	MIF,AURKA,SOX4,CCNB1,PLK1,CDC25C,E2F7,FOXM1,E2F1,DTL,PCNA,CDK1,E2F8
GO:0000183	rDNA heterochromatin assembly	8	37	0.89	0.0015	9606.ENSP00000333277,9606.ENSP00000347168,9606.ENSP00000352252,9606.ENSP00000358154,9606.ENSP00000366956,9606.ENSP00000366999,9606.ENSP00000367034,9606.ENSP00000385479	HIST2H3D,HIST1H4J,HIST1H3J,HIST2H3C,HIST1H4H,HIST1H3D,HIST1H4C,HIST2H3A
GO:0030595	Leukocyte chemotaxis	15	142	0.58	0.0015	9606.ENSP00000219150,9606.ENSP00000284878,9606.ENSP00000286758,9606.ENSP00000289707,9606.ENSP00000289902,9606.ENSP00000305651,9606.ENSP00000306512,9606.ENSP00000306884,9606.ENSP00000351671,9606.ENSP00000354901,9606.ENSP00000357722,9606.ENSP00000357727,9606.ENSP00000361668,9606.ENSP00000386884,9606.ENSP00000453302	CORO1A,CXADR,CXCL13,SLAMF8,FCER1G,CXCL10,CXCL8,CXCL11,CCL20,CXCL9,S100A8,S100A9,EDN2,CXCR4,ADAM8
GO:0071346	Cellular response to interferon-gamma	16	161	0.56	0.0015	9606.ENSP00000228928,9606.ENSP00000229239,9606.ENSP00000257570,9606.ENSP00000264832,9606.ENSP00000342278,9606.ENSP00000351671,9606.ENSP00000354394,9606.ENSP00000355890,9606.ENSP00000358165,9606.ENSP00000359488,9606.ENSP00000364076,9606.ENSP00000364080,9606.ENSP00000365402,9606.ENSP00000378786,9606.ENSP00000384886,9606.ENSP00000399168	OAS3,GAPDH,OASL,ICAM1,OAS2,CCL20,STAT1,EPRS,FCGR1A,GBP5,HLA-DQA2,HLA-DQB1,HLA-C,HLA-DRA,IFI30,HLA-B
GO:0080090	Regulation of primary metabolic process	212	6032	0.11	0.0015	9606.ENSP00000166345,9606.ENSP00000209728,9606.ENSP00000215754,9606.ENSP00000216117,9606.ENSP00000216127,9606.ENSP00000216341,9606.ENSP00000216911,9606.ENSP00000217026,9606.ENSP00000217086,9606.ENSP00000218230,9606.ENSP00000225655,9606.ENSP00000225964,9606.ENSP00000226279,9606.ENSP00000228843,9606.ENSP00000228928,9606.ENSP00000229239,9606.ENSP00000230321,9606.ENSP00000233893,9606.ENSP00000236671,…	TRIP13,CDC6,MIF,HMOX1,RASD2,GZMB,AURKA,MYBL2,SALL4,PCSK1N,PFN1,COL1A1,CD38,RAD51AP1,OAS3,GAPDH,MDFI,HSPE1,CTSD,PFN2,INHBA,HIST1H1D,HIST1H1A,SOX4,DLGAP5,NUP210,CCNB1,OASL,ESPL1,IGF2BP3,BRIP1,CDK2AP1,PKMYT1,CCNE1,PRDX1,E2F3,EPCAM,POLQ,CD80,UBE2S,ICAM1,CENPE,PITX1,TFEC,GAL,DBF4,SQLE,ARNTL2,HES6,CCNA2,NFKBIE,CCT5,OTX1,THY1,UCHL1,SAMSN1,ATAD2,CCNB2,CSTB,EN1,CCT3,H2AFZ,HMGB2,MAD2L1,RAD21,A2ML1,PLK1,TPX…
GO:0000076	DNA replication checkpoint	6	17	1.11	0.0016	9606.ENSP00000209728,9606.ENSP00000301019,9606.ENSP00000312995,9606.ENSP00000360623,9606.ENSP00000405726,9606.ENSP00000450607	CDC6,CDT1,CLSPN,ORC1,CDC45,TIMELESS
GO:0051130	Positive regulation of cellular component organization	59	1209	0.25	0.0016	9606.ENSP00000216341,9606.ENSP00000216911,9606.ENSP00000225655,9606.ENSP00000239940,9606.ENSP00000244573,9606.ENSP00000247191,9606.ENSP00000252599,9606.ENSP00000256442,9606.ENSP00000257934,9606.ENSP00000262629,9606.ENSP00000264832,9606.ENSP00000265748,9606.ENSP00000270861,9606.ENSP00000275517,9606.ENSP00000280326,9606.ENSP00000284240,9606.ENSP00000286758,9606.ENSP00000295688,9606.ENSP00000296484,…	GZMB,AURKA,PFN1,PFN2,HIST1H1A,DLGAP5,COLGALT1,CCNB1,ESPL1,TYROBP,ICAM1,ANLN,PLK4,CDCA5,CCT5,THY1,CXCL13,CCT3,POC1A,RAD21,CDT1,BIRC5,CLEC7A,LRP8,FEN1,AURKB,EZH2,MMP1,SPAG5,PMAIP1,TNFRSF12A,HIST1H1B,EPHB3,NME1,PLAUR,E2F1,FN1,UBE2C,DNMT1,CXCL9,PARP1,NEK2,PFDN2,S100A9,PSRC1,GBP5,MMP9,CDC20,LCN2,SDC1,LCP1,CXCR4,RANBP1,CFL1,DDX11,NUSAP1,APOC2,GREM1,ENC1
GO:0001775	Cell activation	54	1075	0.26	0.0017	9606.ENSP00000215754,9606.ENSP00000219150,9606.ENSP00000222271,9606.ENSP00000225964,9606.ENSP00000236147,9606.ENSP00000236671,9606.ENSP00000244745,9606.ENSP00000250092,9606.ENSP00000260118,9606.ENSP00000261267,9606.ENSP00000262428,9606.ENSP00000262629,9606.ENSP00000262746,9606.ENSP00000264832,9606.ENSP00000271638,9606.ENSP00000284878,9606.ENSP00000289707,9606.ENSP00000289902,9606.ENSP00000291568,…	MIF,CORO1A,COMP,COL1A1,SELL,CTSD,SOX4,CD68,GGH,LYZ,COTL1,TYROBP,PRDX1,ICAM1,S100A11,CXADR,SLAMF8,FCER1G,CSTB,S100P,CLEC7A,CXCL10,CXCL8,PKM,CD86,TUBB,PLAUR,QPCT,CTSB,PNP,ILF2,EXO1,S100A7,S100A8,S100A9,CTSS,MMP9,EDN2,CTPS1,PLAU,LCN2,HLA-C,UBD,CKAP4,PRDX4,CALML5,RSAD2,HELLS,LCP1,HLA-B,MS4A1,CLEC5A,ADAM8,ITGAX
GO:0010971	Positive regulation of g2/m transition of mitotic cell cycle	7	27	0.97	0.0017	9606.ENSP00000256442,9606.ENSP00000303706,9606.ENSP00000321656,9606.ENSP00000355958,9606.ENSP00000364585,9606.ENSP00000378699,9606.ENSP00000393139	CCNB1,CDC25A,CDC25C,DTL,RCC2,CDK1,CDC7
GO:0034341	Response to interferon-gamma	17	182	0.53	0.0017	9606.ENSP00000228928,9606.ENSP00000229239,9606.ENSP00000257570,9606.ENSP00000264832,9606.ENSP00000342278,9606.ENSP00000351671,9606.ENSP00000354394,9606.ENSP00000355890,9606.ENSP00000358165,9606.ENSP00000359488,9606.ENSP00000364076,9606.ENSP00000364080,9606.ENSP00000365402,9606.ENSP00000366249,9606.ENSP00000378786,9606.ENSP00000384886,9606.ENSP00000399168	OAS3,GAPDH,OASL,ICAM1,OAS2,CCL20,STAT1,EPRS,FCGR1A,GBP5,HLA-DQA2,HLA-DQB1,HLA-C,UBD,HLA-DRA,IFI30,HLA-B
GO:0034502	Protein localization to chromosome	10	64	0.75	0.0017	9606.ENSP00000297338,9606.ENSP00000300093,9606.ENSP00000313950,9606.ENSP00000320147,9606.ENSP00000330074,9606.ENSP00000335463,9606.ENSP00000336868,9606.ENSP00000358813,9606.ENSP00000364585,9606.ENSP00000378699	RAD21,PLK1,AURKB,EZH2,HIST1H1B,CASC5,CENPA,TTK,RCC2,CDK1
GO:0046483	Heterocycle metabolic process	114	2840	0.16	0.0017	9606.ENSP00000166345,9606.ENSP00000209728,9606.ENSP00000216117,9606.ENSP00000216122,9606.ENSP00000221486,9606.ENSP00000228843,9606.ENSP00000228928,9606.ENSP00000229239,9606.ENSP00000229270,9606.ENSP00000240488,9606.ENSP00000242776,9606.ENSP00000256442,9606.ENSP00000256722,9606.ENSP00000259008,9606.ENSP00000260118,9606.ENSP00000262105,9606.ENSP00000262643,9606.ENSP00000262904,9606.ENSP00000264156,…	TRIP13,CDC6,HMOX1,MCM5,RNASEH2A,RAD51AP1,OAS3,GAPDH,TPI1,MND1,DDX39A,CCNB1,CMPK2,BRIP1,GGH,MCM4,CCNE1,E2F3,MCM6,POLQ,NEIL3,MCM2,SNRPG,CDCA5,HMGB2,RAD21,KIAA0101,CHAF1A,TK1,FEN1,ISG20,RMI2,FANCI,CLSPN,TYMS,GEN1,EZH2,PKM,APOBEC3B,PIF1,LIN9,IDH2,SHMT2,NME1,ETV7,OAS2,FOXM1,E2F1,HIST1H4J,BLM,DNMT1,RRM2,WDHD1,PNP,ILF2,HORMAD1,E2F2,EXO1,HIST3H2A,PARP1,EPRS,CENPF,DTL,UBE2T,HMGB3,ORC1,RAD54L,CTPS1,PGK1,SR…
GO:0071156	Regulation of cell cycle arrest	13	110	0.63	0.0017	9606.ENSP00000215754,9606.ENSP00000216911,9606.ENSP00000244745,9606.ENSP00000256442,9606.ENSP00000320866,9606.ENSP00000321656,9606.ENSP00000323246,9606.ENSP00000342307,9606.ENSP00000345571,9606.ENSP00000368458,9606.ENSP00000378699,9606.ENSP00000418915,9606.ENSP00000481103	MIF,AURKA,SOX4,CCNB1,CALR,CDC25C,E2F7,FOXM1,E2F1,PCNA,CDK1,CDKN2A,E2F8
GO:1901360	Organic cyclic compound metabolic process	123	3118	0.16	0.0017	9606.ENSP00000166345,9606.ENSP00000209728,9606.ENSP00000216117,9606.ENSP00000216122,9606.ENSP00000221486,9606.ENSP00000228843,9606.ENSP00000228928,9606.ENSP00000229239,9606.ENSP00000229270,9606.ENSP00000240488,9606.ENSP00000242776,9606.ENSP00000256442,9606.ENSP00000256722,9606.ENSP00000259008,9606.ENSP00000260118,9606.ENSP00000262105,9606.ENSP00000262643,9606.ENSP00000262904,9606.ENSP00000264156,…	TRIP13,CDC6,HMOX1,MCM5,RNASEH2A,RAD51AP1,OAS3,GAPDH,TPI1,MND1,DDX39A,CCNB1,CMPK2,BRIP1,GGH,MCM4,CCNE1,E2F3,MCM6,POLQ,NEIL3,MCM2,SQLE,SNRPG,CDCA5,HMGB2,RAD21,KIAA0101,CHAF1A,TK1,FEN1,ISG20,RMI2,FANCI,CLSPN,TYMS,GEN1,EZH2,PKM,APOBEC3B,PIF1,LIN9,IDH2,SHMT2,NME1,ETV7,OAS2,FOXM1,E2F1,CTSB,HIST1H4J,BLM,DHCR7,DNMT1,RRM2,WDHD1,PNP,ILF2,HORMAD1,E2F2,EXO1,HIST3H2A,PARP1,EPRS,CENPF,DTL,UBE2T,SLC16A10,HMGB3,…
GO:1903507	Negative regulation of nucleic acid-templated transcription	63	1324	0.24	0.0017	9606.ENSP00000217086,9606.ENSP00000226279,9606.ENSP00000230321,9606.ENSP00000244534,9606.ENSP00000262643,9606.ENSP00000262904,9606.ENSP00000265340,9606.ENSP00000265440,9606.ENSP00000272937,9606.ENSP00000295206,9606.ENSP00000296417,9606.ENSP00000296503,9606.ENSP00000300093,9606.ENSP00000301633,9606.ENSP00000307705,9606.ENSP00000308750,9606.ENSP00000313950,9606.ENSP00000320147,9606.ENSP00000320866,…	SALL4,CD38,MDFI,HIST1H1D,CCNE1,E2F3,PITX1,TFEC,HES6,EN1,H2AFZ,HMGB2,PLK1,BIRC5,HIST1H1E,CBX2,AURKB,EZH2,CALR,SOX11,E2F7,HIST1H1B,HIST2H2AB,HIST2H3D,HIST1H1C,HIST1H2AD,ETV7,FOXM1,E2F1,HIST1H4J,HIST1H2AI,HIST1H2AG,HIST1H3J,DNMT1,STAT1,E2F2,HIST3H2A,PARP1,CENPF,HDGF,HIST2H3C,HIST2H2AA,DKK1,MAGED1,HIST1H4H,HIST1H3D,HIST1H4C,PCNA,FOXC1,LILRB4,HELLS,RUNX3,HIST2H3A,TONSL,SMARCA4,HMGA1,DEPDC1,CDKN2A,H2AF…
GO:0045892	Negative regulation of transcription, dna-templated	61	1273	0.24	0.0019	9606.ENSP00000217086,9606.ENSP00000226279,9606.ENSP00000230321,9606.ENSP00000244534,9606.ENSP00000262643,9606.ENSP00000262904,9606.ENSP00000265340,9606.ENSP00000272937,9606.ENSP00000295206,9606.ENSP00000296417,9606.ENSP00000296503,9606.ENSP00000300093,9606.ENSP00000301633,9606.ENSP00000307705,9606.ENSP00000308750,9606.ENSP00000313950,9606.ENSP00000320147,9606.ENSP00000320866,9606.ENSP00000322568,…	SALL4,CD38,MDFI,HIST1H1D,CCNE1,E2F3,PITX1,HES6,EN1,H2AFZ,HMGB2,PLK1,BIRC5,HIST1H1E,CBX2,AURKB,EZH2,CALR,SOX11,E2F7,HIST1H1B,HIST2H2AB,HIST2H3D,HIST1H1C,HIST1H2AD,ETV7,FOXM1,E2F1,HIST1H4J,HIST1H2AI,HIST1H2AG,HIST1H3J,DNMT1,STAT1,E2F2,HIST3H2A,PARP1,CENPF,HDGF,HIST2H3C,HIST2H2AA,DKK1,MAGED1,HIST1H4H,HIST1H3D,HIST1H4C,PCNA,FOXC1,LILRB4,HELLS,RUNX3,HIST2H3A,SMARCA4,HMGA1,DEPDC1,CDKN2A,H2AFX,PRAME,TIM…
GO:0071459	Protein localization to chromosome, centromeric region	6	18	1.08	0.002	9606.ENSP00000313950,9606.ENSP00000335463,9606.ENSP00000336868,9606.ENSP00000358813,9606.ENSP00000364585,9606.ENSP00000378699	AURKB,CASC5,CENPA,TTK,RCC2,CDK1
GO:0051653	Spindle localization	9	52	0.8	0.0021	9606.ENSP00000257934,9606.ENSP00000261597,9606.ENSP00000296509,9606.ENSP00000300093,9606.ENSP00000336868,9606.ENSP00000356379,9606.ENSP00000376333,9606.ENSP00000386348,9606.ENSP00000453403	ESPL1,NDC80,MAD2L1,PLK1,CENPA,ASPM,LLGL2,SAPCD2,NUSAP1
GO:0030330	DNA damage response, signal transduction by p53 class mediator	11	82	0.69	0.0024	9606.ENSP00000215754,9606.ENSP00000216911,9606.ENSP00000244745,9606.ENSP00000256442,9606.ENSP00000321656,9606.ENSP00000323246,9606.ENSP00000342307,9606.ENSP00000345571,9606.ENSP00000368458,9606.ENSP00000378699,9606.ENSP00000481103	MIF,AURKA,SOX4,CCNB1,CDC25C,E2F7,FOXM1,E2F1,PCNA,CDK1,E2F8
GO:0043067	Regulation of programmed cell death	71	1569	0.22	0.0024	9606.ENSP00000215754,9606.ENSP00000216117,9606.ENSP00000216341,9606.ENSP00000216911,9606.ENSP00000217026,9606.ENSP00000219150,9606.ENSP00000222271,9606.ENSP00000226279,9606.ENSP00000229239,9606.ENSP00000233893,9606.ENSP00000236671,9606.ENSP00000242208,9606.ENSP00000244745,9606.ENSP00000248958,9606.ENSP00000262629,9606.ENSP00000262904,9606.ENSP00000263735,9606.ENSP00000264832,9606.ENSP00000265643,…	MIF,HMOX1,GZMB,AURKA,MYBL2,CORO1A,COMP,CD38,GAPDH,HSPE1,CTSD,INHBA,SOX4,SDF2L1,TYROBP,E2F3,EPCAM,ICAM1,GAL,BCL2A1,FCER1G,EN1,HMGB2,MAD2L1,MELK,PLK1,BIRC5,CLEC7A,LRP8,CTLA4,CXCL10,AURKB,CALR,PMAIP1,TNFRSF12A,P4HB,NME1,PLAUR,IFI6,E2F1,CTSB,FN1,DNMT1,STAT1,PARP1,KIF14,S100A8,S100A9,IRAK1,SLC25A5,STIL,MMP9,RTKN2,DKK1,MAGED1,UBD,FOXC1,MST4,CDK1,CXCR4,HTATIP2,TOP2A,CDKN2A,IDO1,CFL1,MTRNR2L8,PRAME,CLEC5…
GO:0071704	Organic substance metabolic process	260	7755	0.09	0.0024	9606.ENSP00000005286,9606.ENSP00000166345,9606.ENSP00000209728,9606.ENSP00000215743,9606.ENSP00000215754,9606.ENSP00000215794,9606.ENSP00000216117,9606.ENSP00000216122,9606.ENSP00000216341,9606.ENSP00000216911,9606.ENSP00000218230,9606.ENSP00000221486,9606.ENSP00000222271,9606.ENSP00000228843,9606.ENSP00000228928,9606.ENSP00000229239,9606.ENSP00000229270,9606.ENSP00000236671,9606.ENSP00000240488,…	TMEM132A,TRIP13,CDC6,MMP11,MIF,USP18,HMOX1,MCM5,GZMB,AURKA,PCSK1N,RNASEH2A,COMP,RAD51AP1,OAS3,GAPDH,TPI1,CTSD,MND1,INHBA,DDX39A,HIST1H1D,SDF2L1,NUP210,ADAMDEC1,CCNB1,CMPK2,ADAM19,ESPL1,IGF2BP3,BRIP1,CLPS,MRPL15,GGH,SULF1,MMP7,MMP13,LYZ,CDK2AP1,MCM4,PKMYT1,IL12RB2,CCNE1,E2F3,MCM6,POLQ,UBE2S,NEIL3,MCM2,DBF4,SQLE,PLK4,SNRPG,CCNA2,PLA2G7,CDCA5,ST14,FADS2,THY1,UCHL1,BUB1B,HIST1H2BD,FCER1G,RPL39L,HMGB2…
GO:0006342	Chromatin silencing	9	54	0.78	0.0026	9606.ENSP00000296417,9606.ENSP00000320147,9606.ENSP00000332790,9606.ENSP00000341094,9606.ENSP00000351589,9606.ENSP00000352119,9606.ENSP00000355656,9606.ENSP00000358155,9606.ENSP00000434024	H2AFZ,EZH2,HIST2H2AB,HIST1H2AD,HIST1H2AI,HIST1H2AG,HIST3H2A,HIST2H2AA,H2AFX
GO:0010604	Positive regulation of macromolecule metabolic process	137	3600	0.14	0.0026	9606.ENSP00000209728,9606.ENSP00000215754,9606.ENSP00000216117,9606.ENSP00000216127,9606.ENSP00000216911,9606.ENSP00000217026,9606.ENSP00000217086,9606.ENSP00000225964,9606.ENSP00000226279,9606.ENSP00000229239,9606.ENSP00000233893,9606.ENSP00000236671,9606.ENSP00000239940,9606.ENSP00000242208,9606.ENSP00000244534,9606.ENSP00000244573,9606.ENSP00000244745,9606.ENSP00000247191,9606.ENSP00000256442,…	CDC6,MIF,HMOX1,RASD2,AURKA,MYBL2,SALL4,COL1A1,CD38,GAPDH,HSPE1,CTSD,PFN2,INHBA,HIST1H1D,HIST1H1A,SOX4,DLGAP5,CCNB1,ADAM19,ESPL1,SULF1,CDK2AP1,IL12RB2,TYROBP,CCNE1,E2F3,EPCAM,CD80,UBE2S,ICAM1,CENPE,PITX1,TFEC,GAL,DBF4,ARNTL2,CCNA2,CCT5,OTX1,ATAD2,FCER1G,EN1,CCT3,H2AFZ,HMGB2,PLK1,TPX2,CDT1,CLEC7A,LRP8,CXCL10,HIST1H1E,FANCI,CKS1B,CLSPN,AURKB,EZH2,CALR,DSCC1,SOX11,E2F7,PMAIP1,CDCA2,HIST1H1B,CD86,CDCA…
GO:0031145	Anaphase-promoting complex-dependent catabolic process	11	83	0.68	0.0026	9606.ENSP00000216911,9606.ENSP00000256442,9606.ENSP00000264552,9606.ENSP00000287598,9606.ENSP00000296509,9606.ENSP00000300093,9606.ENSP00000313950,9606.ENSP00000348838,9606.ENSP00000361540,9606.ENSP00000377536,9606.ENSP00000378699	AURKA,CCNB1,UBE2S,BUB1B,MAD2L1,PLK1,AURKB,UBE2C,CDC20,PTTG1,CDK1
GO:0045005	DNA-dependent DNA replication maintenance of fidelity	8	41	0.85	0.0026	9606.ENSP00000318977,9606.ENSP00000347232,9606.ENSP00000368458,9606.ENSP00000372088,9606.ENSP00000386239,9606.ENSP00000421592,9606.ENSP00000440402,9606.ENSP00000450607	GEN1,BLM,PCNA,RAD51,TONSL,ALYREF,DDX11,TIMELESS
GO:0051493	Regulation of cytoskeleton organization	33	546	0.34	0.0026	9606.ENSP00000216911,9606.ENSP00000219150,9606.ENSP00000225655,9606.ENSP00000233143,9606.ENSP00000239940,9606.ENSP00000260731,9606.ENSP00000262428,9606.ENSP00000263181,9606.ENSP00000263867,9606.ENSP00000264832,9606.ENSP00000270861,9606.ENSP00000296484,9606.ENSP00000300093,9606.ENSP00000300403,9606.ENSP00000304283,9606.ENSP00000318977,9606.ENSP00000319417,9606.ENSP00000323300,9606.ENSP00000326550,…	AURKA,CORO1A,PFN1,TMSB10,PFN2,KIF11,COTL1,KIF18A,CAPG,ICAM1,PLK4,POC1A,PLK1,TPX2,RAC3,GEN1,SKA3,SPAG5,TACC3,IQGAP3,NEK2,PFDN2,S100A8,S100A9,PSRC1,STIL,RCC1,CKAP2,RANBP1,STMN1,SPTBN2,CFL1,ENSG00000158164
GO:0006139	Nucleobase-containing compound metabolic process	107	2659	0.16	0.0027	9606.ENSP00000166345,9606.ENSP00000209728,9606.ENSP00000216122,9606.ENSP00000221486,9606.ENSP00000228843,9606.ENSP00000228928,9606.ENSP00000229239,9606.ENSP00000229270,9606.ENSP00000240488,9606.ENSP00000242776,9606.ENSP00000256442,9606.ENSP00000256722,9606.ENSP00000259008,9606.ENSP00000262105,9606.ENSP00000262643,9606.ENSP00000262904,9606.ENSP00000264156,9606.ENSP00000264233,9606.ENSP00000264596,…	TRIP13,CDC6,MCM5,RNASEH2A,RAD51AP1,OAS3,GAPDH,TPI1,MND1,DDX39A,CCNB1,CMPK2,BRIP1,MCM4,CCNE1,E2F3,MCM6,POLQ,NEIL3,MCM2,SNRPG,CDCA5,HMGB2,RAD21,KIAA0101,CHAF1A,TK1,FEN1,ISG20,RMI2,FANCI,CLSPN,TYMS,GEN1,EZH2,PKM,APOBEC3B,PIF1,LIN9,IDH2,NME1,ETV7,OAS2,FOXM1,E2F1,HIST1H4J,BLM,DNMT1,RRM2,WDHD1,PNP,ILF2,HORMAD1,E2F2,EXO1,HIST3H2A,PARP1,EPRS,CENPF,DTL,UBE2T,HMGB3,ORC1,RAD54L,CTPS1,PGK1,SRPK1,HIST1H4H,HIS…
GO:0043085	Positive regulation of catalytic activity	68	1489	0.22	0.0027	9606.ENSP00000209728,9606.ENSP00000215754,9606.ENSP00000225655,9606.ENSP00000233893,9606.ENSP00000236671,9606.ENSP00000239940,9606.ENSP00000240423,9606.ENSP00000256442,9606.ENSP00000259938,9606.ENSP00000264552,9606.ENSP00000264832,9606.ENSP00000265036,9606.ENSP00000265148,9606.ENSP00000265728,9606.ENSP00000284240,9606.ENSP00000286758,9606.ENSP00000296503,9606.ENSP00000300093,9606.ENSP00000300403,…	CDC6,MIF,PFN1,HSPE1,CTSD,PFN2,NCAPH,CCNB1,CLPS,UBE2S,ICAM1,DEPDC1B,CENPE,DBF4,THY1,CXCL13,HMGB2,PLK1,TPX2,CLEC7A,LRP8,CKS1B,CLSPN,AURKB,EZH2,DSCC1,PMAIP1,CD86,EPHB3,FN1,UBE2C,CCL20,IQGAP3,ARHGAP11A,NEK2,KIF14,RGS1,S100A8,S100A9,RGS10,FCGR1A,PSRC1,IRAK1,CDC20,EDN2,CLPSL1,DKK1,RCC2,MAGED1,CKS2,PCNA,RFC4,LLGL2,MST4,INCENP,CDK1,CXCR4,NCAPG2,RANBP1,RACGAP1,DEPDC1,CDKN2A,PBK,DDX11,ADAM8,APOC1,APOC2,GRE…
GO:0043903	Regulation of symbiotic process	19	230	0.48	0.0027	9606.ENSP00000228928,9606.ENSP00000229239,9606.ENSP00000257570,9606.ENSP00000306512,9606.ENSP00000306565,9606.ENSP00000327459,9606.ENSP00000327801,9606.ENSP00000342278,9606.ENSP00000354394,9606.ENSP00000362931,9606.ENSP00000368699,9606.ENSP00000369317,9606.ENSP00000371471,9606.ENSP00000386884,9606.ENSP00000395654,9606.ENSP00000411532,9606.ENSP00000432218,9606.ENSP00000432660,9606.ENSP00000438483	OAS3,GAPDH,OASL,CXCL8,ISG20,APOBEC3B,P4HB,OAS2,STAT1,SRPK1,ISG15,KRT6A,RSAD2,CXCR4,SMARCA4,TOP2A,IL32,CFL1,KPNA2
GO:0051315	Attachment of mitotic spindle microtubules to kinetochore	5	11	1.22	0.0027	9606.ENSP00000261597,9606.ENSP00000265148,9606.ENSP00000271452,9606.ENSP00000301019,9606.ENSP00000361298	NDC80,CENPE,NUF2,CDT1,KIF2C
GO:0042981	Regulation of apoptotic process	70	1550	0.21	0.0028	9606.ENSP00000215754,9606.ENSP00000216117,9606.ENSP00000216341,9606.ENSP00000216911,9606.ENSP00000217026,9606.ENSP00000219150,9606.ENSP00000222271,9606.ENSP00000226279,9606.ENSP00000229239,9606.ENSP00000233893,9606.ENSP00000236671,9606.ENSP00000242208,9606.ENSP00000244745,9606.ENSP00000248958,9606.ENSP00000262629,9606.ENSP00000262904,9606.ENSP00000263735,9606.ENSP00000264832,9606.ENSP00000265643,…	MIF,HMOX1,GZMB,AURKA,MYBL2,CORO1A,COMP,CD38,GAPDH,HSPE1,CTSD,INHBA,SOX4,SDF2L1,TYROBP,E2F3,EPCAM,ICAM1,GAL,BCL2A1,FCER1G,EN1,HMGB2,MAD2L1,MELK,PLK1,BIRC5,CLEC7A,LRP8,CTLA4,CXCL10,AURKB,CALR,PMAIP1,TNFRSF12A,P4HB,NME1,PLAUR,IFI6,E2F1,CTSB,FN1,DNMT1,STAT1,PARP1,KIF14,S100A8,S100A9,IRAK1,SLC25A5,STIL,MMP9,RTKN2,DKK1,MAGED1,UBD,FOXC1,MST4,CDK1,HTATIP2,TOP2A,CDKN2A,IDO1,CFL1,MTRNR2L8,PRAME,CLEC5A,ADAM…
GO:0098761	Cellular response to interleukin-7	8	42	0.84	0.0029	9606.ENSP00000327801,9606.ENSP00000333277,9606.ENSP00000352252,9606.ENSP00000357189,9606.ENSP00000358154,9606.ENSP00000366999,9606.ENSP00000385479,9606.ENSP00000395654	P4HB,HIST2H3D,HIST1H3J,HDGF,HIST2H3C,HIST1H3D,HIST2H3A,SMARCA4
GO:0042221	Response to chemical	159	4333	0.12	0.0031	9606.ENSP00000209728,9606.ENSP00000215754,9606.ENSP00000216117,9606.ENSP00000217026,9606.ENSP00000219150,9606.ENSP00000222271,9606.ENSP00000225964,9606.ENSP00000226279,9606.ENSP00000226284,9606.ENSP00000228928,9606.ENSP00000229239,9606.ENSP00000233893,9606.ENSP00000236147,9606.ENSP00000242208,9606.ENSP00000244745,9606.ENSP00000248958,9606.ENSP00000250092,9606.ENSP00000256442,9606.ENSP00000256722,…	CDC6,MIF,HMOX1,MYBL2,CORO1A,COMP,COL1A1,CD38,IBSP,OAS3,GAPDH,HSPE1,SELL,INHBA,SOX4,SDF2L1,CD68,CCNB1,CMPK2,OASL,BRIP1,CLPS,MRPL15,GGH,MMP13,LMNB1,IL12RB2,CCNE1,PRDX1,KIF18A,CD80,ICAM1,MCM2,GAL,SQLE,ERP27,CCNA2,UCHL1,CXADR,CXCL13,SLAMF8,FCER1G,LAPTM5,S100P,H2AFZ,HMGB2,MELK,CDT1,BIRC5,CLEC7A,LRP8,CXCL10,CST1,SHCBP1,CXCL8,ISG20,BOLA2B,CXCL11,TYMS,EZH2,PKM,CALR,MMP1,PMAIP1,TNFRSF12A,P4HB,BOLA2,CD86,E…
GO:0045934	Negative regulation of nucleobase-containing compound metabolic process	69	1528	0.21	0.0031	9606.ENSP00000217086,9606.ENSP00000226279,9606.ENSP00000230321,9606.ENSP00000244534,9606.ENSP00000244573,9606.ENSP00000262643,9606.ENSP00000262904,9606.ENSP00000264233,9606.ENSP00000265340,9606.ENSP00000265440,9606.ENSP00000272937,9606.ENSP00000295206,9606.ENSP00000296417,9606.ENSP00000296503,9606.ENSP00000300093,9606.ENSP00000301633,9606.ENSP00000307705,9606.ENSP00000308750,9606.ENSP00000310356,…	SALL4,CD38,MDFI,HIST1H1D,HIST1H1A,CCNE1,E2F3,POLQ,PITX1,TFEC,HES6,EN1,H2AFZ,HMGB2,PLK1,BIRC5,HIST1H1E,CBX2,RMI2,AURKB,EZH2,CALR,SOX11,E2F7,PIF1,HIST1H1B,HIST2H2AB,HIST2H3D,HIST1H1C,HIST1H2AD,ETV7,FOXM1,E2F1,HIST1H4J,BLM,HIST1H2AI,HIST1H2AG,HIST1H3J,DNMT1,STAT1,E2F2,HIST3H2A,PARP1,CENPF,HDGF,HIST2H3C,HIST2H2AA,DKK1,MAGED1,HIST1H4H,HIST1H3D,HIST1H4C,PCNA,FOXC1,LILRB4,HELLS,FANCB,RUNX3,HIST2H3A,TONS…
GO:2000105	Positive regulation of dna-dependent dna replication	5	12	1.18	0.0037	9606.ENSP00000265728,9606.ENSP00000301019,9606.ENSP00000323246,9606.ENSP00000393139,9606.ENSP00000481103	DBF4,CDT1,E2F7,CDC7,E2F8
GO:0016477	Cell migration	46	896	0.27	0.0039	9606.ENSP00000215754,9606.ENSP00000219150,9606.ENSP00000225964,9606.ENSP00000236147,9606.ENSP00000261622,9606.ENSP00000263735,9606.ENSP00000264832,9606.ENSP00000265036,9606.ENSP00000265748,9606.ENSP00000284878,9606.ENSP00000286758,9606.ENSP00000289707,9606.ENSP00000289902,9606.ENSP00000296370,9606.ENSP00000296503,9606.ENSP00000301653,9606.ENSP00000305651,9606.ENSP00000306512,9606.ENSP00000306884,…	MIF,CORO1A,COL1A1,SELL,SLC7A5,EPCAM,ICAM1,DEPDC1B,ANLN,CXADR,CXCL13,SLAMF8,FCER1G,S100P,HMGB2,KRT16,CXCL10,CXCL8,CXCL11,MMP1,TNFRSF12A,CTHRC1,EPHB3,PODXL2,FN1,CCL20,CXCL9,ASPM,S100A2,S100A8,S100A9,EDN2,PLAU,BAMBI,FOXC1,SDC1,CDK1,LCP1,CXCR4,ARTN,CFL1,ADAM8,ITGAX,SLC16A3,GREM1,FAM83D
GO:0031323	Regulation of cellular metabolic process	215	6239	0.1	0.0039	9606.ENSP00000166345,9606.ENSP00000209728,9606.ENSP00000215754,9606.ENSP00000216117,9606.ENSP00000216127,9606.ENSP00000216341,9606.ENSP00000216911,9606.ENSP00000217026,9606.ENSP00000217086,9606.ENSP00000218230,9606.ENSP00000225655,9606.ENSP00000225964,9606.ENSP00000226279,9606.ENSP00000228843,9606.ENSP00000228928,9606.ENSP00000229239,9606.ENSP00000230321,9606.ENSP00000233893,9606.ENSP00000236671,…	TRIP13,CDC6,MIF,HMOX1,RASD2,GZMB,AURKA,MYBL2,SALL4,PCSK1N,PFN1,COL1A1,CD38,RAD51AP1,OAS3,GAPDH,MDFI,HSPE1,CTSD,PFN2,INHBA,HIST1H1D,HIST1H1A,SOX4,DLGAP5,NUP210,CCNB1,OASL,ESPL1,IGF2BP3,BRIP1,CDK2AP1,PKMYT1,TYROBP,CCNE1,PRDX1,E2F3,EPCAM,POLQ,CD80,UBE2S,ICAM1,CENPE,PITX1,TFEC,GAL,DBF4,ARNTL2,S100A11,HES6,CCNA2,NFKBIE,CCT5,OTX1,THY1,UCHL1,SAMSN1,ATAD2,CCNB2,SLAMF8,CSTB,EN1,CCT3,H2AFZ,HMGB2,MAD2L1,RAD…
GO:0006335	DNA replication-dependent nucleosome assembly	7	32	0.9	0.004	9606.ENSP00000263382,9606.ENSP00000301280,9606.ENSP00000347168,9606.ENSP00000352252,9606.ENSP00000366956,9606.ENSP00000366999,9606.ENSP00000367034	ASF1B,CHAF1A,HIST1H4J,HIST1H3J,HIST1H4H,HIST1H3D,HIST1H4C
GO:0010605	Negative regulation of macromolecule metabolic process	113	2875	0.15	0.004	9606.ENSP00000209728,9606.ENSP00000215754,9606.ENSP00000216117,9606.ENSP00000216127,9606.ENSP00000216341,9606.ENSP00000216911,9606.ENSP00000217086,9606.ENSP00000218230,9606.ENSP00000226279,9606.ENSP00000229239,9606.ENSP00000230321,9606.ENSP00000242208,9606.ENSP00000244534,9606.ENSP00000244573,9606.ENSP00000244745,9606.ENSP00000256442,9606.ENSP00000258729,9606.ENSP00000259008,9606.ENSP00000262629,…	CDC6,MIF,HMOX1,RASD2,GZMB,AURKA,SALL4,PCSK1N,CD38,GAPDH,MDFI,INHBA,HIST1H1D,HIST1H1A,SOX4,CCNB1,IGF2BP3,BRIP1,TYROBP,CCNE1,E2F3,POLQ,PITX1,TFEC,S100A11,HES6,THY1,UCHL1,SAMSN1,CSTB,EN1,H2AFZ,HMGB2,MAD2L1,A2ML1,PLK1,BIRC5,CST1,MRPL13,HIST1H1E,CBX2,PPP1R14B,RMI2,AURKB,TYMS,EZH2,CALR,SOX11,E2F7,PIF1,HIST1H1B,HIST2H2AB,HIST2H3D,NME1,PLAUR,HIST1H1C,EIF4EBP1,HIST1H2AD,ETV7,FOXM1,IFI6,E2F1,FN1,HIST1H4J,B…
GO:0031297	Replication fork processing	7	32	0.9	0.004	9606.ENSP00000318977,9606.ENSP00000347232,9606.ENSP00000368458,9606.ENSP00000372088,9606.ENSP00000386239,9606.ENSP00000421592,9606.ENSP00000440402	GEN1,BLM,PCNA,RAD51,TONSL,ALYREF,DDX11
GO:0072331	Signal transduction by p53 class mediator	13	123	0.58	0.0043	9606.ENSP00000215754,9606.ENSP00000216911,9606.ENSP00000244745,9606.ENSP00000256442,9606.ENSP00000321656,9606.ENSP00000323246,9606.ENSP00000326119,9606.ENSP00000342307,9606.ENSP00000345571,9606.ENSP00000355249,9606.ENSP00000368458,9606.ENSP00000378699,9606.ENSP00000481103	MIF,AURKA,SOX4,CCNB1,CDC25C,E2F7,PMAIP1,FOXM1,E2F1,E2F2,PCNA,CDK1,E2F8
GO:0006977	DNA damage response, signal transduction by p53 class mediator resulting in cell cycle arrest	9	59	0.74	0.0045	9606.ENSP00000216911,9606.ENSP00000244745,9606.ENSP00000256442,9606.ENSP00000321656,9606.ENSP00000323246,9606.ENSP00000345571,9606.ENSP00000368458,9606.ENSP00000378699,9606.ENSP00000481103	AURKA,SOX4,CCNB1,CDC25C,E2F7,E2F1,PCNA,CDK1,E2F8
GO:0044238	Primary metabolic process	246	7332	0.09	0.0045	9606.ENSP00000005286,9606.ENSP00000166345,9606.ENSP00000209728,9606.ENSP00000215743,9606.ENSP00000215754,9606.ENSP00000215794,9606.ENSP00000216122,9606.ENSP00000216341,9606.ENSP00000216911,9606.ENSP00000218230,9606.ENSP00000221486,9606.ENSP00000222271,9606.ENSP00000228843,9606.ENSP00000228928,9606.ENSP00000229239,9606.ENSP00000229270,9606.ENSP00000236671,9606.ENSP00000240488,9606.ENSP00000242208,…	TMEM132A,TRIP13,CDC6,MMP11,MIF,USP18,MCM5,GZMB,AURKA,PCSK1N,RNASEH2A,COMP,RAD51AP1,OAS3,GAPDH,TPI1,CTSD,MND1,INHBA,DDX39A,HIST1H1D,SDF2L1,NUP210,ADAMDEC1,CCNB1,CMPK2,ADAM19,ESPL1,IGF2BP3,BRIP1,CLPS,MRPL15,GGH,SULF1,MMP7,MMP13,LYZ,MCM4,PKMYT1,IL12RB2,CCNE1,E2F3,MCM6,POLQ,UBE2S,NEIL3,MCM2,SQLE,PLK4,SNRPG,CCNA2,PLA2G7,CDCA5,ST14,FADS2,THY1,UCHL1,BUB1B,HIST1H2BD,RPL39L,HMGB2,MAD2L1,RAD21,MELK,KIAA010…
GO:0045143	Homologous chromosome segregation	9	59	0.74	0.0045	9606.ENSP00000166345,9606.ENSP00000257934,9606.ENSP00000259008,9606.ENSP00000262643,9606.ENSP00000263753,9606.ENSP00000300093,9606.ENSP00000355167,9606.ENSP00000377536,9606.ENSP00000429089	TRIP13,ESPL1,BRIP1,CCNE1,SGOL1,PLK1,HORMAD1,PTTG1,CCNE2
GO:0007063	Regulation of sister chromatid cohesion	6	22	1	0.0046	9606.ENSP00000257934,9606.ENSP00000275517,9606.ENSP00000297338,9606.ENSP00000302530,9606.ENSP00000305480,9606.ENSP00000440402	ESPL1,CDCA5,RAD21,BUB1,FEN1,DDX11
GO:0010941	Regulation of cell death	74	1696	0.2	0.0046	9606.ENSP00000215754,9606.ENSP00000216117,9606.ENSP00000216341,9606.ENSP00000216911,9606.ENSP00000217026,9606.ENSP00000219150,9606.ENSP00000222271,9606.ENSP00000226279,9606.ENSP00000229239,9606.ENSP00000233893,9606.ENSP00000236671,9606.ENSP00000242208,9606.ENSP00000244745,9606.ENSP00000248958,9606.ENSP00000250160,9606.ENSP00000262629,9606.ENSP00000262904,9606.ENSP00000263735,9606.ENSP00000264832,…	MIF,HMOX1,GZMB,AURKA,MYBL2,CORO1A,COMP,CD38,GAPDH,HSPE1,CTSD,INHBA,SOX4,SDF2L1,WISP1,TYROBP,E2F3,EPCAM,ICAM1,GAL,BCL2A1,FCER1G,EN1,HMGB2,MAD2L1,MELK,PLK1,BIRC5,CLEC7A,LRP8,CTLA4,CXCL10,AURKB,CALR,SOX11,PMAIP1,TNFRSF12A,P4HB,NME1,PLAUR,IFI6,E2F1,CTSB,FN1,DNMT1,STAT1,PARP1,KIF14,S100A8,S100A9,IRAK1,SLC25A5,STIL,MMP9,RTKN2,DKK1,MAGED1,UBD,FOXC1,MST4,CDK1,PYCR1,CXCR4,HTATIP2,TOP2A,CDKN2A,IDO1,CFL1,MT…
GO:0032069	Regulation of nuclease activity	6	22	1	0.0046	9606.ENSP00000228928,9606.ENSP00000257570,9606.ENSP00000296503,9606.ENSP00000342278,9606.ENSP00000368458,9606.ENSP00000440402	OAS3,OASL,HMGB2,OAS2,PCNA,DDX11
GO:0008152	Metabolic process	273	8298	0.08	0.0048	9606.ENSP00000005286,9606.ENSP00000166345,9606.ENSP00000209728,9606.ENSP00000215743,9606.ENSP00000215754,9606.ENSP00000215794,9606.ENSP00000216117,9606.ENSP00000216122,9606.ENSP00000216341,9606.ENSP00000216911,9606.ENSP00000218230,9606.ENSP00000221486,9606.ENSP00000222271,9606.ENSP00000225964,9606.ENSP00000226279,9606.ENSP00000228843,9606.ENSP00000228928,9606.ENSP00000229239,9606.ENSP00000229270,…	TMEM132A,TRIP13,CDC6,MMP11,MIF,USP18,HMOX1,MCM5,GZMB,AURKA,PCSK1N,RNASEH2A,COMP,COL1A1,CD38,RAD51AP1,OAS3,GAPDH,TPI1,CTSD,MND1,INHBA,DDX39A,HIST1H1D,SDF2L1,NUP210,ADAMDEC1,CCNB1,CMPK2,ADAM19,ESPL1,IGF2BP3,BRIP1,CLPS,MRPL15,GGH,SULF1,MMP7,MMP13,LYZ,CDK2AP1,MCM4,PKMYT1,IL12RB2,CCNE1,PRDX1,E2F3,MCM6,POLQ,UBE2S,NEIL3,MCM2,DBF4,SQLE,PLK4,SNRPG,CCNA2,PLA2G7,CDCA5,NDUFB9,ST14,FADS2,THY1,UCHL1,PDIA4,BUB1…
GO:0051382	Kinetochore assembly	5	13	1.14	0.0048	9606.ENSP00000265148,9606.ENSP00000336868,9606.ENSP00000355922,9606.ENSP00000357308,9606.ENSP00000377007	CENPE,CENPA,CENPF,CENPW,CENPN
GO:0090304	Nucleic acid metabolic process	90	2178	0.18	0.0048	9606.ENSP00000166345,9606.ENSP00000209728,9606.ENSP00000216122,9606.ENSP00000221486,9606.ENSP00000228843,9606.ENSP00000240488,9606.ENSP00000242776,9606.ENSP00000256442,9606.ENSP00000259008,9606.ENSP00000262105,9606.ENSP00000262643,9606.ENSP00000262904,9606.ENSP00000264156,9606.ENSP00000264233,9606.ENSP00000264596,9606.ENSP00000265056,9606.ENSP00000272348,9606.ENSP00000275517,9606.ENSP00000296503,…	TRIP13,CDC6,MCM5,RNASEH2A,RAD51AP1,MND1,DDX39A,CCNB1,BRIP1,MCM4,CCNE1,E2F3,MCM6,POLQ,NEIL3,MCM2,SNRPG,CDCA5,HMGB2,RAD21,KIAA0101,CHAF1A,TK1,FEN1,ISG20,RMI2,FANCI,CLSPN,TYMS,GEN1,EZH2,APOBEC3B,PIF1,LIN9,NME1,ETV7,OAS2,FOXM1,E2F1,HIST1H4J,BLM,DNMT1,WDHD1,ILF2,HORMAD1,E2F2,EXO1,HIST3H2A,PARP1,EPRS,CENPF,DTL,UBE2T,HMGB3,ORC1,RAD54L,SRPK1,HIST1H4H,HIST1H4C,PCNA,ISG15,RAD51,FANCA,RFC4,PTTG1,HELLS,CDK1,…
GO:0031640	Killing of cells of other organism	11	91	0.64	0.0049	9606.ENSP00000229239,9606.ENSP00000261267,9606.ENSP00000286758,9606.ENSP00000305651,9606.ENSP00000306512,9606.ENSP00000306884,9606.ENSP00000349430,9606.ENSP00000351671,9606.ENSP00000354901,9606.ENSP00000369317,9606.ENSP00000476136	GAPDH,LYZ,CXCL13,CXCL10,CXCL8,CXCL11,HIST1H2BK,CCL20,CXCL9,KRT6A,HIST1H2BJ
GO:0043044	ATP-dependent chromatin remodeling	11	91	0.64	0.0049	9606.ENSP00000281453,9606.ENSP00000335463,9606.ENSP00000336868,9606.ENSP00000347168,9606.ENSP00000357308,9606.ENSP00000366956,9606.ENSP00000367034,9606.ENSP00000377007,9606.ENSP00000395654,9606.ENSP00000414109,9606.ENSP00000463154	CENPU,CASC5,CENPA,HIST1H4J,CENPW,HIST1H4H,HIST1H4C,CENPN,SMARCA4,HJURP,ANP32E
GO:0071900	Regulation of protein serine/threonine kinase activity	31	521	0.33	0.005	9606.ENSP00000209728,9606.ENSP00000215754,9606.ENSP00000256442,9606.ENSP00000262300,9606.ENSP00000262643,9606.ENSP00000265728,9606.ENSP00000274026,9606.ENSP00000284240,9606.ENSP00000284440,9606.ENSP00000288207,9606.ENSP00000300093,9606.ENSP00000303706,9606.ENSP00000305651,9606.ENSP00000311083,9606.ENSP00000320147,9606.ENSP00000321656,9606.ENSP00000335357,9606.ENSP00000347232,9606.ENSP00000354451,…	CDC6,MIF,CCNB1,PKMYT1,CCNE1,DBF4,CCNA2,THY1,UCHL1,CCNB2,PLK1,CDC25A,CXCL10,CKS1B,EZH2,CDC25C,CDKN3,BLM,IQGAP3,PSRC1,IRAK1,DKK1,MAGED1,CKS2,INCENP,CDK1,CXCR4,CDKN2A,PBK,CCNE2,ADAM8
GO:0072719	Cellular response to cisplatin	4	6	1.38	0.005	9606.ENSP00000216117,9606.ENSP00000372088,9606.ENSP00000440402,9606.ENSP00000450607	HMOX1,RAD51,DDX11,TIMELESS
GO:0098532	Histone h3-k27 trimethylation	4	6	1.38	0.005	9606.ENSP00000244534,9606.ENSP00000307705,9606.ENSP00000320147,9606.ENSP00000339566	HIST1H1D,HIST1H1E,EZH2,HIST1H1C
GO:0035722	interleukin-12-mediated signaling pathway	8	47	0.79	0.0054	9606.ENSP00000215754,9606.ENSP00000261366,9606.ENSP00000262345,9606.ENSP00000306752,9606.ENSP00000327801,9606.ENSP00000331127,9606.ENSP00000381581,9606.ENSP00000432660	MIF,LMNB1,IL12RB2,BOLA2B,P4HB,BOLA2,LCP1,CFL1
GO:0051293	Establishment of spindle localization	8	47	0.79	0.0054	9606.ENSP00000257934,9606.ENSP00000261597,9606.ENSP00000296509,9606.ENSP00000300093,9606.ENSP00000336868,9606.ENSP00000376333,9606.ENSP00000386348,9606.ENSP00000453403	ESPL1,NDC80,MAD2L1,PLK1,CENPA,LLGL2,SAPCD2,NUSAP1
GO:0034501	Protein localization to kinetochore	5	14	1.11	0.006	9606.ENSP00000313950,9606.ENSP00000335463,9606.ENSP00000358813,9606.ENSP00000364585,9606.ENSP00000378699	AURKB,CASC5,TTK,RCC2,CDK1
GO:0048513	Animal organ development	122	3197	0.14	0.006	9606.ENSP00000209718,9606.ENSP00000216117,9606.ENSP00000216911,9606.ENSP00000217086,9606.ENSP00000222271,9606.ENSP00000225964,9606.ENSP00000226284,9606.ENSP00000230321,9606.ENSP00000242208,9606.ENSP00000244745,9606.ENSP00000250160,9606.ENSP00000252252,9606.ENSP00000256442,9606.ENSP00000257527,9606.ENSP00000259008,9606.ENSP00000260128,9606.ENSP00000260302,9606.ENSP00000262629,9606.ENSP00000263181,…	KRT23,HMOX1,AURKA,SALL4,COMP,COL1A1,IBSP,MDFI,INHBA,SOX4,WISP1,KRT6B,CCNB1,ADAM19,BRIP1,SULF1,MMP13,TYROBP,KIF18A,EPCAM,ICAM1,MCM2,PITX1,ANLN,BCL2A1,PLK4,CCNA2,ST14,DSC2,OTX1,THY1,CXADR,CCNB2,SLAMF8,FCER1G,EN1,POC1A,HMGB2,MELK,EVPL,KRT16,LRP8,RAC3,CXCL10,CXCL8,TYMS,EZH2,PKM,CALR,SOX11,E2F7,TACC3,BGN,HIST1H1B,CTHRC1,EPHB3,NME1,EIF4EBP1,COL9A3,ETV7,E2F1,CTSB,FN1,DHCR7,STAT1,PARP1,CENPF,KIF14,ASPM,S…
GO:0090266	Regulation of mitotic cell cycle spindle assembly checkpoint	5	14	1.11	0.006	9606.ENSP00000256442,9606.ENSP00000261597,9606.ENSP00000296509,9606.ENSP00000301019,9606.ENSP00000318977	CCNB1,NDC80,MAD2L1,CDT1,GEN1
GO:0044403	Symbiotic process	44	865	0.27	0.0061	9606.ENSP00000229239,9606.ENSP00000254508,9606.ENSP00000264246,9606.ENSP00000264832,9606.ENSP00000274026,9606.ENSP00000281453,9606.ENSP00000284878,9606.ENSP00000302530,9606.ENSP00000321656,9606.ENSP00000322788,9606.ENSP00000332049,9606.ENSP00000336868,9606.ENSP00000345571,9606.ENSP00000345672,9606.ENSP00000346206,9606.ENSP00000346839,9606.ENSP00000354394,9606.ENSP00000356991,9606.ENSP00000358997,…	GAPDH,NUP210,CD80,ICAM1,CCNA2,CENPU,CXADR,BUB1,CDC25C,MMP1,CD86,CENPA,E2F1,CTSB,TAP1,FN1,STAT1,PVRL4,IRAK1,SLC25A5,SRPK1,RCC1,TAP2,HLA-C,PCNA,ISG15,KRT6A,RSAD2,CDK1,HLA-DRA,CXCR4,HTATIP2,SMARCA4,HLA-B,HMGA1,RANBP1,LRRC15,ALYREF,CFL1,H2AFX,SLC52A2,KPNA2,DDX11,CLEC5A
GO:0045859	Regulation of protein kinase activity	42	812	0.27	0.0062	9606.ENSP00000209728,9606.ENSP00000215754,9606.ENSP00000256442,9606.ENSP00000262300,9606.ENSP00000262643,9606.ENSP00000265148,9606.ENSP00000265728,9606.ENSP00000274026,9606.ENSP00000284240,9606.ENSP00000284440,9606.ENSP00000288207,9606.ENSP00000300093,9606.ENSP00000300403,9606.ENSP00000303634,9606.ENSP00000303706,9606.ENSP00000305651,9606.ENSP00000311083,9606.ENSP00000312995,9606.ENSP00000320147,…	CDC6,MIF,CCNB1,PKMYT1,CCNE1,CENPE,DBF4,CCNA2,THY1,UCHL1,CCNB2,PLK1,TPX2,LRP8,CDC25A,CXCL10,CKS1B,CLSPN,EZH2,CDC25C,CD86,CDKN3,BLM,IQGAP3,KIF14,FCGR1A,PSRC1,IRAK1,DKK1,MAGED1,CKS2,MST4,INCENP,CDK1,CXCR4,NCAPG2,CDKN2A,PBK,CCNE2,ADAM8,DBNDD1,GREM1
GO:0002684	Positive regulation of immune system process	47	949	0.25	0.0065	9606.ENSP00000215754,9606.ENSP00000216117,9606.ENSP00000219150,9606.ENSP00000226279,9606.ENSP00000242208,9606.ENSP00000244745,9606.ENSP00000262629,9606.ENSP00000264246,9606.ENSP00000264832,9606.ENSP00000274793,9606.ENSP00000284240,9606.ENSP00000286758,9606.ENSP00000289902,9606.ENSP00000296503,9606.ENSP00000302569,9606.ENSP00000303939,9606.ENSP00000305651,9606.ENSP00000306512,9606.ENSP00000320866,…	MIF,HMOX1,CORO1A,CD38,INHBA,SOX4,TYROBP,CD80,ICAM1,PLA2G7,THY1,CXCL13,FCER1G,HMGB2,CLEC7A,CTLA4,CXCL10,CXCL8,CALR,CD86,FPR3,CCL20,STAT1,PNP,FCGR3A,S100A7,FCGR1A,HMGB3,GBP5,EDN2,HLA-DQA2,HLA-DQB1,ISG15,FOXC1,RSAD2,LILRB4,HLA-DRA,MUC16,PPAPDC1A,RUNX3,HLA-B,MYO10,FYB,IDO1,MS4A1,MUC5B,ADAM8
GO:0007166	Cell surface receptor signaling pathway	94	2325	0.17	0.0065	9606.ENSP00000215754,9606.ENSP00000216117,9606.ENSP00000219150,9606.ENSP00000222271,9606.ENSP00000225655,9606.ENSP00000225964,9606.ENSP00000226279,9606.ENSP00000228928,9606.ENSP00000242208,9606.ENSP00000247191,9606.ENSP00000250160,9606.ENSP00000257570,9606.ENSP00000260128,9606.ENSP00000261366,9606.ENSP00000262345,9606.ENSP00000262629,9606.ENSP00000262643,9606.ENSP00000264246,9606.ENSP00000264832,…	MIF,HMOX1,CORO1A,COMP,PFN1,COL1A1,CD38,OAS3,INHBA,DLGAP5,WISP1,OASL,SULF1,LMNB1,IL12RB2,TYROBP,CCNE1,CD80,ICAM1,BCL2A1,THY1,CXCL13,FCER1G,BIRC5,LRP8,CTLA4,FAM83B,RAC3,CXCL10,SHCBP1,CXCL8,ISG20,BOLA2B,CXCL11,MMP1,TNFRSF12A,P4HB,CTHRC1,BOLA2,CD86,EPHB3,HIST2H3D,PLAUR,EIF4EBP1,FPR3,OAS2,IFI6,FN1,CCL20,HIST1H3J,STAT1,CXCL9,PARP1,FCGR3A,HIST2H3C,FCGR1A,IRAK1,STIL,MMP9,EDN2,LCN2,DKK1,HLA-DQA2,HLA-DQB1,…
GO:0010638	Positive regulation of organelle organization	35	633	0.3	0.0069	9606.ENSP00000216341,9606.ENSP00000216911,9606.ENSP00000225655,9606.ENSP00000239940,9606.ENSP00000247191,9606.ENSP00000256442,9606.ENSP00000257934,9606.ENSP00000264832,9606.ENSP00000270861,9606.ENSP00000275517,9606.ENSP00000280326,9606.ENSP00000295688,9606.ENSP00000296484,9606.ENSP00000297338,9606.ENSP00000301019,9606.ENSP00000301633,9606.ENSP00000305480,9606.ENSP00000313950,9606.ENSP00000323300,…	GZMB,AURKA,PFN1,PFN2,DLGAP5,CCNB1,ESPL1,ICAM1,PLK4,CDCA5,CCT5,CCT3,POC1A,RAD21,CDT1,BIRC5,FEN1,AURKB,SPAG5,PMAIP1,HIST1H1B,PLAUR,E2F1,UBE2C,DNMT1,NEK2,PFDN2,PSRC1,MMP9,SDC1,LCP1,RANBP1,CFL1,DDX11,NUSAP1
GO:0009893	Positive regulation of metabolic process	143	3893	0.12	0.0073	9606.ENSP00000209728,9606.ENSP00000215754,9606.ENSP00000216117,9606.ENSP00000216127,9606.ENSP00000216911,9606.ENSP00000217026,9606.ENSP00000217086,9606.ENSP00000225964,9606.ENSP00000226279,9606.ENSP00000229239,9606.ENSP00000233893,9606.ENSP00000236671,9606.ENSP00000239940,9606.ENSP00000242208,9606.ENSP00000244534,9606.ENSP00000244573,9606.ENSP00000244745,9606.ENSP00000247191,9606.ENSP00000256442,…	CDC6,MIF,HMOX1,RASD2,AURKA,MYBL2,SALL4,COL1A1,CD38,GAPDH,HSPE1,CTSD,PFN2,INHBA,HIST1H1D,HIST1H1A,SOX4,DLGAP5,CCNB1,ADAM19,ESPL1,SULF1,CDK2AP1,IL12RB2,TYROBP,CCNE1,E2F3,EPCAM,CD80,UBE2S,ICAM1,CENPE,PITX1,TFEC,GAL,DBF4,ARNTL2,CCNA2,CCT5,OTX1,ATAD2,FCER1G,EN1,CCT3,H2AFZ,HMGB2,PLK1,TPX2,CDT1,CLEC7A,LRP8,CXCL10,HIST1H1E,FANCI,CKS1B,CLSPN,AURKB,EZH2,CALR,DSCC1,SOX11,E2F7,PMAIP1,CDCA2,HIST1H1B,CD86,EPHB…
GO:0010032	Meiotic chromosome condensation	4	7	1.32	0.0073	9606.ENSP00000240423,9606.ENSP00000325017,9606.ENSP00000349961,9606.ENSP00000378295	NCAPH,NCAPD2,SMC4,INCENP
GO:0006959	Humoral immune response	20	275	0.42	0.0075	9606.ENSP00000229239,9606.ENSP00000261267,9606.ENSP00000286758,9606.ENSP00000305651,9606.ENSP00000306512,9606.ENSP00000306884,9606.ENSP00000321744,9606.ENSP00000349430,9606.ENSP00000351671,9606.ENSP00000354901,9606.ENSP00000355506,9606.ENSP00000357712,9606.ENSP00000357722,9606.ENSP00000357727,9606.ENSP00000358151,9606.ENSP00000362108,9606.ENSP00000364080,9606.ENSP00000369317,9606.ENSP00000433277,…	GAPDH,LYZ,CXCL13,CXCL10,CXCL8,CXCL11,HIST1H2BC,HIST1H2BK,CCL20,CXCL9,EXO1,S100A7,S100A8,S100A9,HIST2H2BE,LCN2,HLA-DQB1,KRT6A,MS4A1,HIST1H2BJ
GO:0051445	Regulation of meiotic cell cycle	8	50	0.76	0.0075	9606.ENSP00000166345,9606.ENSP00000303706,9606.ENSP00000320866,9606.ENSP00000321656,9606.ENSP00000355167,9606.ENSP00000356379,9606.ENSP00000358813,9606.ENSP00000361540	TRIP13,CDC25A,CALR,CDC25C,HORMAD1,ASPM,TTK,CDC20
GO:0040001	Establishment of mitotic spindle localization	7	37	0.84	0.0077	9606.ENSP00000257934,9606.ENSP00000261597,9606.ENSP00000296509,9606.ENSP00000300093,9606.ENSP00000336868,9606.ENSP00000386348,9606.ENSP00000453403	ESPL1,NDC80,MAD2L1,PLK1,CENPA,SAPCD2,NUSAP1
GO:0007098	Centrosome cycle	10	81	0.65	0.008	9606.ENSP00000216911,9606.ENSP00000260731,9606.ENSP00000263753,9606.ENSP00000270861,9606.ENSP00000300035,9606.ENSP00000300093,9606.ENSP00000355966,9606.ENSP00000360944,9606.ENSP00000378699,9606.ENSP00000384792	AURKA,KIF11,SGOL1,PLK4,KIAA0101,PLK1,NEK2,STIL,CDK1,WDR62
GO:0006928	Movement of cell or subcellular component	66	1501	0.2	0.0083	9606.ENSP00000215754,9606.ENSP00000219150,9606.ENSP00000225964,9606.ENSP00000236147,9606.ENSP00000247191,9606.ENSP00000260363,9606.ENSP00000260731,9606.ENSP00000261622,9606.ENSP00000263181,9606.ENSP00000263735,9606.ENSP00000264832,9606.ENSP00000265036,9606.ENSP00000265148,9606.ENSP00000265748,9606.ENSP00000284440,9606.ENSP00000284878,9606.ENSP00000286758,9606.ENSP00000289707,9606.ENSP00000289902,…	MIF,CORO1A,COL1A1,SELL,DLGAP5,KIF23,KIF11,SLC7A5,KIF18A,EPCAM,ICAM1,DEPDC1B,CENPE,ANLN,UCHL1,CXADR,CXCL13,SLAMF8,FCER1G,S100P,HMGB2,KRT16,CXCL10,CXCL8,CXCL11,MMP1,KIF15,TNFRSF12A,CTHRC1,EPHB3,PODXL2,FN1,CCL20,CXCL9,KIF14,ASPM,IGSF9,TPM3,S100A2,S100A8,S100A9,KIF2C,EDN2,PLAU,KIF4A,BAMBI,FOXC1,SDC1,KIF20A,CDK1,LCP1,CXCR4,ARTN,KIFC1,RACGAP1,SPTBN2,CFL1,KIF1A,ENSG00000258947,ADAM8,ITGAX,SLC16A3,KIF18B…
GO:1904666	Regulation of ubiquitin protein ligase activity	6	26	0.92	0.0089	9606.ENSP00000264552,9606.ENSP00000296509,9606.ENSP00000300093,9606.ENSP00000348838,9606.ENSP00000361540,9606.ENSP00000418915	UBE2S,MAD2L1,PLK1,UBE2C,CDC20,CDKN2A
GO:0009058	Biosynthetic process	108	2788	0.15	0.0091	9606.ENSP00000166345,9606.ENSP00000209728,9606.ENSP00000215754,9606.ENSP00000216122,9606.ENSP00000221486,9606.ENSP00000225964,9606.ENSP00000229239,9606.ENSP00000229270,9606.ENSP00000242208,9606.ENSP00000248958,9606.ENSP00000256442,9606.ENSP00000256722,9606.ENSP00000258729,9606.ENSP00000259008,9606.ENSP00000260102,9606.ENSP00000261692,9606.ENSP00000262105,9606.ENSP00000262643,9606.ENSP00000262904,…	TRIP13,CDC6,MIF,MCM5,RNASEH2A,COL1A1,GAPDH,TPI1,INHBA,SDF2L1,CCNB1,CMPK2,IGF2BP3,BRIP1,MRPL15,CDK2AP1,MCM4,CCNE1,E2F3,MCM6,POLQ,MCM2,DBF4,SQLE,SNRPG,FADS2,RPL39L,KIAA0101,CDT1,CHAF1A,TK1,FEN1,MRPL13,RMI2,CLSPN,TYMS,GEN1,PKM,DSCC1,BGN,PIF1,LIN9,IDH2,SHMT2,NME1,EIF4EBP1,ETV7,E2F1,PLCH1,HIST1H4J,BLM,DHCR7,RRM2,WDHD1,PNP,ILF2,E2F2,EXO1,PARP1,EPRS,CENPF,DTL,ORC1,MRPL14,EDN2,CTPS1,PGK1,PSAT1,SLC25A39,H…
GO:0010629	Negative regulation of gene expression	83	2014	0.17	0.0091	9606.ENSP00000215754,9606.ENSP00000216117,9606.ENSP00000216341,9606.ENSP00000216911,9606.ENSP00000217086,9606.ENSP00000226279,9606.ENSP00000229239,9606.ENSP00000230321,9606.ENSP00000242208,9606.ENSP00000244534,9606.ENSP00000256442,9606.ENSP00000258729,9606.ENSP00000259008,9606.ENSP00000262629,9606.ENSP00000262643,9606.ENSP00000262904,9606.ENSP00000265340,9606.ENSP00000272937,9606.ENSP00000295206,…	MIF,HMOX1,GZMB,AURKA,SALL4,CD38,GAPDH,MDFI,INHBA,HIST1H1D,CCNB1,IGF2BP3,BRIP1,TYROBP,CCNE1,E2F3,PITX1,HES6,EN1,H2AFZ,HMGB2,PLK1,BIRC5,MRPL13,HIST1H1E,CBX2,AURKB,TYMS,EZH2,CALR,SOX11,E2F7,HIST1H1B,HIST2H2AB,HIST2H3D,NME1,HIST1H1C,EIF4EBP1,HIST1H2AD,ETV7,FOXM1,E2F1,FN1,HIST1H4J,HIST1H2AI,HIST1H2AG,HIST1H3J,DNMT1,STAT1,IQGAP3,E2F2,HIST3H2A,PARP1,EPRS,CENPF,HDGF,HIST2H3C,HIST2H2AA,DKK1,MAGED1,HIST1H4…
GO:0050792	Regulation of viral process	17	215	0.46	0.0091	9606.ENSP00000228928,9606.ENSP00000257570,9606.ENSP00000306512,9606.ENSP00000306565,9606.ENSP00000327459,9606.ENSP00000327801,9606.ENSP00000342278,9606.ENSP00000354394,9606.ENSP00000362931,9606.ENSP00000368699,9606.ENSP00000371471,9606.ENSP00000386884,9606.ENSP00000395654,9606.ENSP00000411532,9606.ENSP00000432218,9606.ENSP00000432660,9606.ENSP00000438483	OAS3,OASL,CXCL8,ISG20,APOBEC3B,P4HB,OAS2,STAT1,SRPK1,ISG15,RSAD2,CXCR4,SMARCA4,TOP2A,IL32,CFL1,KPNA2
GO:1903706	Regulation of hemopoiesis	29	493	0.33	0.0093	9606.ENSP00000242208,9606.ENSP00000244745,9606.ENSP00000262629,9606.ENSP00000264246,9606.ENSP00000289707,9606.ENSP00000296503,9606.ENSP00000303939,9606.ENSP00000332049,9606.ENSP00000333277,9606.ENSP00000337060,9606.ENSP00000347168,9606.ENSP00000352252,9606.ENSP00000354394,9606.ENSP00000354532,9606.ENSP00000358154,9606.ENSP00000359393,9606.ENSP00000366956,9606.ENSP00000366999,9606.ENSP00000367034,…	INHBA,SOX4,TYROBP,CD80,SLAMF8,HMGB2,CTLA4,CD86,HIST2H3D,NME1,HIST1H4J,HIST1H3J,STAT1,PNP,HIST2H3C,HMGB3,HIST1H4H,HIST1H3D,HIST1H4C,ISG15,FOXC1,FANCA,LILRB4,RUNX3,HIST2H3A,NCAPG2,HLA-B,CDKN2A,ADAM8
GO:0016584	Nucleosome positioning	5	16	1.05	0.0094	9606.ENSP00000244534,9606.ENSP00000244573,9606.ENSP00000307705,9606.ENSP00000330074,9606.ENSP00000339566	HIST1H1D,HIST1H1A,HIST1H1E,HIST1H1B,HIST1H1C
GO:1902806	Regulation of cell cycle g1/s phase transition	15	175	0.49	0.0094	9606.ENSP00000209728,9606.ENSP00000216911,9606.ENSP00000244745,9606.ENSP00000256442,9606.ENSP00000320147,9606.ENSP00000321656,9606.ENSP00000323246,9606.ENSP00000345571,9606.ENSP00000356319,9606.ENSP00000368458,9606.ENSP00000378699,9606.ENSP00000405726,9606.ENSP00000418915,9606.ENSP00000481103,9606.ENSP00000481110	CDC6,AURKA,SOX4,CCNB1,EZH2,CDC25C,E2F7,E2F1,KIF14,PCNA,CDK1,CDC45,CDKN2A,E2F8,FAM83D
GO:2000045	Regulation of g1/s transition of mitotic cell cycle	14	156	0.51	0.0098	9606.ENSP00000209728,9606.ENSP00000216911,9606.ENSP00000244745,9606.ENSP00000256442,9606.ENSP00000320147,9606.ENSP00000321656,9606.ENSP00000323246,9606.ENSP00000345571,9606.ENSP00000356319,9606.ENSP00000368458,9606.ENSP00000378699,9606.ENSP00000405726,9606.ENSP00000418915,9606.ENSP00000481103	CDC6,AURKA,SOX4,CCNB1,EZH2,CDC25C,E2F7,E2F1,KIF14,PCNA,CDK1,CDC45,CDKN2A,E2F8
GO:1901576	Organic substance biosynthetic process	106	2734	0.15	0.01	9606.ENSP00000166345,9606.ENSP00000209728,9606.ENSP00000215754,9606.ENSP00000216122,9606.ENSP00000221486,9606.ENSP00000229239,9606.ENSP00000229270,9606.ENSP00000242208,9606.ENSP00000248958,9606.ENSP00000256442,9606.ENSP00000256722,9606.ENSP00000258729,9606.ENSP00000259008,9606.ENSP00000260102,9606.ENSP00000261692,9606.ENSP00000262105,9606.ENSP00000262643,9606.ENSP00000262904,9606.ENSP00000264156,…	TRIP13,CDC6,MIF,MCM5,RNASEH2A,GAPDH,TPI1,INHBA,SDF2L1,CCNB1,CMPK2,IGF2BP3,BRIP1,MRPL15,CDK2AP1,MCM4,CCNE1,E2F3,MCM6,POLQ,MCM2,DBF4,SQLE,SNRPG,FADS2,RPL39L,KIAA0101,CDT1,CHAF1A,TK1,FEN1,MRPL13,RMI2,CLSPN,TYMS,GEN1,PKM,DSCC1,BGN,PIF1,LIN9,IDH2,SHMT2,NME1,EIF4EBP1,ETV7,E2F1,PLCH1,HIST1H4J,BLM,DHCR7,RRM2,WDHD1,PNP,ILF2,E2F2,EXO1,PARP1,EPRS,CENPF,DTL,ORC1,MRPL14,EDN2,CTPS1,PGK1,PSAT1,SLC25A39,HIST1H4H…
GO:0044773	Mitotic dna damage checkpoint	11	101	0.6	0.0101	9606.ENSP00000216911,9606.ENSP00000244745,9606.ENSP00000256442,9606.ENSP00000312995,9606.ENSP00000321656,9606.ENSP00000323246,9606.ENSP00000345571,9606.ENSP00000347232,9606.ENSP00000368458,9606.ENSP00000378699,9606.ENSP00000481103	AURKA,SOX4,CCNB1,CLSPN,CDC25C,E2F7,E2F1,BLM,PCNA,CDK1,E2F8
GO:0051177	Meiotic sister chromatid cohesion	4	8	1.26	0.0101	9606.ENSP00000263753,9606.ENSP00000287598,9606.ENSP00000302530,9606.ENSP00000355167	SGOL1,BUB1B,BUB1,HORMAD1
GO:0071158	Positive regulation of cell cycle arrest	10	84	0.64	0.0101	9606.ENSP00000216911,9606.ENSP00000244745,9606.ENSP00000256442,9606.ENSP00000321656,9606.ENSP00000323246,9606.ENSP00000345571,9606.ENSP00000368458,9606.ENSP00000378699,9606.ENSP00000418915,9606.ENSP00000481103	AURKA,SOX4,CCNB1,CDC25C,E2F7,E2F1,PCNA,CDK1,CDKN2A,E2F8
GO:0051640	Organelle localization	33	598	0.3	0.0102	9606.ENSP00000216911,9606.ENSP00000247191,9606.ENSP00000256442,9606.ENSP00000257934,9606.ENSP00000260363,9606.ENSP00000261597,9606.ENSP00000263181,9606.ENSP00000265148,9606.ENSP00000270861,9606.ENSP00000271452,9606.ENSP00000275517,9606.ENSP00000284440,9606.ENSP00000296509,9606.ENSP00000300093,9606.ENSP00000301019,9606.ENSP00000301633,9606.ENSP00000336868,9606.ENSP00000339001,9606.ENSP00000355922,…	AURKA,DLGAP5,CCNB1,ESPL1,KIF23,NDC80,KIF18A,CENPE,PLK4,NUF2,CDCA5,UCHL1,MAD2L1,PLK1,CDT1,BIRC5,CENPA,TUBB,CENPF,NEK2,KIF14,ASPM,PSRC1,KIF2C,CDCA8,LLGL2,INCENP,CDK1,SAPCD2,KIFC1,KIF1A,NUSAP1,FAM83D
GO:0009892	Negative regulation of metabolic process	118	3124	0.14	0.011	9606.ENSP00000209728,9606.ENSP00000215754,9606.ENSP00000216117,9606.ENSP00000216127,9606.ENSP00000216341,9606.ENSP00000216911,9606.ENSP00000217086,9606.ENSP00000218230,9606.ENSP00000226279,9606.ENSP00000229239,9606.ENSP00000230321,9606.ENSP00000242208,9606.ENSP00000244534,9606.ENSP00000244573,9606.ENSP00000244745,9606.ENSP00000256442,9606.ENSP00000258729,9606.ENSP00000259008,9606.ENSP00000262300,…	CDC6,MIF,HMOX1,RASD2,GZMB,AURKA,SALL4,PCSK1N,CD38,GAPDH,MDFI,INHBA,HIST1H1D,HIST1H1A,SOX4,CCNB1,IGF2BP3,BRIP1,PKMYT1,TYROBP,CCNE1,E2F3,POLQ,PITX1,TFEC,S100A11,HES6,THY1,UCHL1,SAMSN1,SLAMF8,CSTB,EN1,H2AFZ,HMGB2,MAD2L1,A2ML1,PLK1,BIRC5,CST1,MRPL13,HIST1H1E,CBX2,PPP1R14B,RMI2,AURKB,TYMS,EZH2,CALR,SOX11,E2F7,PIF1,HIST1H1B,HIST2H2AB,HIST2H3D,CASC5,NME1,PLAUR,HIST1H1C,EIF4EBP1,HIST1H2AD,ETV7,FOXM1,IFI6…
GO:0051347	Positive regulation of transferase activity	37	705	0.28	0.011	9606.ENSP00000209728,9606.ENSP00000215754,9606.ENSP00000256442,9606.ENSP00000264552,9606.ENSP00000265148,9606.ENSP00000265728,9606.ENSP00000300093,9606.ENSP00000300403,9606.ENSP00000303634,9606.ENSP00000311083,9606.ENSP00000312995,9606.ENSP00000313950,9606.ENSP00000320147,9606.ENSP00000322180,9606.ENSP00000332049,9606.ENSP00000332118,9606.ENSP00000348838,9606.ENSP00000354451,9606.ENSP00000355966,…	CDC6,MIF,CCNB1,UBE2S,CENPE,DBF4,PLK1,TPX2,LRP8,CKS1B,CLSPN,AURKB,EZH2,DSCC1,CD86,EPHB3,UBE2C,IQGAP3,NEK2,KIF14,FCGR1A,PSRC1,IRAK1,CDC20,DKK1,MAGED1,CKS2,PCNA,RFC4,MST4,INCENP,CDK1,CXCR4,NCAPG2,PBK,ADAM8,GREM1
GO:0045740	Positive regulation of dna replication	7	40	0.8	0.0111	9606.ENSP00000265728,9606.ENSP00000301019,9606.ENSP00000323246,9606.ENSP00000368458,9606.ENSP00000378699,9606.ENSP00000393139,9606.ENSP00000481103	DBF4,CDT1,E2F7,PCNA,CDK1,CDC7,E2F8
GO:0051641	Cellular localization	113	2967	0.14	0.0113	9606.ENSP00000215754,9606.ENSP00000216911,9606.ENSP00000219150,9606.ENSP00000225964,9606.ENSP00000233143,9606.ENSP00000236147,9606.ENSP00000236671,9606.ENSP00000242776,9606.ENSP00000247191,9606.ENSP00000250092,9606.ENSP00000254508,9606.ENSP00000256442,9606.ENSP00000257934,9606.ENSP00000260118,9606.ENSP00000260363,9606.ENSP00000261267,9606.ENSP00000261597,9606.ENSP00000262428,9606.ENSP00000262629,…	MIF,AURKA,CORO1A,COL1A1,TMSB10,SELL,CTSD,DDX39A,DLGAP5,CD68,NUP210,CCNB1,ESPL1,GGH,KIF23,LYZ,NDC80,COTL1,TYROBP,E2F3,KIF18A,CENPE,ANLN,PLK4,NUF2,S100A11,SNRPG,CDCA5,THY1,UCHL1,FCER1G,CSTB,S100P,MAD2L1,RAD21,PLK1,CDT1,TUBA1C,BIRC5,AURKB,EZH2,PKM,CALR,SPAG5,PMAIP1,HIST1H1B,CASC5,TUBA1B,CENPA,TUBB,PLAUR,YIF1B,QPCT,CTSB,PLCH1,TAP1,FN1,SLC6A9,PNP,ILF2,CENPF,NEK2,KIF14,ASPM,S100A7,S100A8,S100A9,CTSS,TT…
GO:0051782	Negative regulation of cell division	5	17	1.03	0.0114	9606.ENSP00000313950,9606.ENSP00000323246,9606.ENSP00000347232,9606.ENSP00000356379,9606.ENSP00000481103	AURKB,E2F7,BLM,ASPM,E2F8
GO:2000026	Regulation of multicellular organismal development	85	2096	0.17	0.0118	9606.ENSP00000216117,9606.ENSP00000222271,9606.ENSP00000225655,9606.ENSP00000225964,9606.ENSP00000226279,9606.ENSP00000242208,9606.ENSP00000244745,9606.ENSP00000250160,9606.ENSP00000256442,9606.ENSP00000260128,9606.ENSP00000262629,9606.ENSP00000264246,9606.ENSP00000265643,9606.ENSP00000272937,9606.ENSP00000284240,9606.ENSP00000284878,9606.ENSP00000286758,9606.ENSP00000289707,9606.ENSP00000296503,…	HMOX1,COMP,PFN1,COL1A1,CD38,INHBA,SOX4,WISP1,CCNB1,SULF1,TYROBP,CD80,GAL,HES6,THY1,CXADR,CXCL13,SLAMF8,HMGB2,LRP8,CTLA4,RAC3,CXCL10,CXCL8,EZH2,PKM,CALR,SOX11,TNFRSF12A,CTHRC1,IDH2,CD86,EPHB3,HIST2H3D,NME1,OAS2,E2F1,FN1,HIST1H4J,HIST1H3J,DNMT1,STAT1,IQGAP3,PNP,E2F2,CENPF,KIF14,ASPM,S100A9,HIST2H3C,HMGB3,MMP9,CDC20,PGK1,DKK1,BAMBI,MAGED1,HIST1H4H,HIST1H3D,HIST1H4C,ISG15,FOXC1,FANCA,LILRB4,SPP1,CDK1…
GO:0051179	Localization	192	5591	0.1	0.0128	9606.ENSP00000215754,9606.ENSP00000216341,9606.ENSP00000216911,9606.ENSP00000219150,9606.ENSP00000222271,9606.ENSP00000225964,9606.ENSP00000230321,9606.ENSP00000233143,9606.ENSP00000236147,9606.ENSP00000236671,9606.ENSP00000242208,9606.ENSP00000242776,9606.ENSP00000247191,9606.ENSP00000250092,9606.ENSP00000254508,9606.ENSP00000256442,9606.ENSP00000257934,9606.ENSP00000258729,9606.ENSP00000260118,…	MIF,GZMB,AURKA,CORO1A,COMP,COL1A1,MDFI,TMSB10,SELL,CTSD,INHBA,DDX39A,DLGAP5,CD68,NUP210,CCNB1,ESPL1,IGF2BP3,GGH,KIF23,KIF11,LYZ,NDC80,SLC7A5,COTL1,TYROBP,E2F3,KIF18A,EPCAM,NMU,ICAM1,DEPDC1B,CENPE,GAL,ANLN,SQLE,PLK4,NUF2,S100A11,SNRPG,NFKBIE,CDCA5,CCT5,THY1,UCHL1,CXADR,PDIA4,CXCL13,SLAMF8,FCER1G,CSTB,CCT3,S100P,HMGB2,MAD2L1,RAD21,PLK1,CDT1,TUBA1C,SLC39A4,BIRC5,KRT16,CLEC7A,LRP8,CXCL10,CXCL8,CXCL11…
GO:0030155	Regulation of cell adhesion	37	712	0.28	0.0129	9606.ENSP00000219150,9606.ENSP00000225964,9606.ENSP00000226284,9606.ENSP00000244745,9606.ENSP00000256412,9606.ENSP00000257527,9606.ENSP00000263735,9606.ENSP00000264246,9606.ENSP00000264832,9606.ENSP00000284240,9606.ENSP00000286758,9606.ENSP00000303939,9606.ENSP00000304283,9606.ENSP00000306512,9606.ENSP00000320866,9606.ENSP00000327801,9606.ENSP00000332049,9606.ENSP00000332118,9606.ENSP00000339328,…	CORO1A,COL1A1,IBSP,SOX4,ADAMDEC1,ADAM19,EPCAM,CD80,ICAM1,THY1,CXCL13,CTLA4,RAC3,CXCL8,CALR,P4HB,CD86,EPHB3,PLAUR,FN1,PNP,KIF14,IRAK1,PLAU,SPOCK2,RCC2,POSTN,LILRB4,RUNX3,KIF26B,CXCR4,TSTA3,CDKN2A,MYO10,IDO1,ADAM8,GREM1
GO:0060326	Cell chemotaxis	16	204	0.45	0.0141	9606.ENSP00000219150,9606.ENSP00000284878,9606.ENSP00000286758,9606.ENSP00000289707,9606.ENSP00000289902,9606.ENSP00000296503,9606.ENSP00000305651,9606.ENSP00000306512,9606.ENSP00000306884,9606.ENSP00000351671,9606.ENSP00000354901,9606.ENSP00000357722,9606.ENSP00000357727,9606.ENSP00000361668,9606.ENSP00000386884,9606.ENSP00000453302	CORO1A,CXADR,CXCL13,SLAMF8,FCER1G,HMGB2,CXCL10,CXCL8,CXCL11,CCL20,CXCL9,S100A8,S100A9,EDN2,CXCR4,ADAM8
GO:0035295	Tube development	42	851	0.25	0.0142	9606.ENSP00000216117,9606.ENSP00000217086,9606.ENSP00000222271,9606.ENSP00000225655,9606.ENSP00000244745,9606.ENSP00000256442,9606.ENSP00000259008,9606.ENSP00000263181,9606.ENSP00000263735,9606.ENSP00000278742,9606.ENSP00000284240,9606.ENSP00000295206,9606.ENSP00000306512,9606.ENSP00000315644,9606.ENSP00000322568,9606.ENSP00000323246,9606.ENSP00000326737,9606.ENSP00000330523,9606.ENSP00000332118,…	HMOX1,SALL4,COMP,PFN1,SOX4,CCNB1,BRIP1,KIF18A,EPCAM,ST14,THY1,EN1,CXCL8,TYMS,SOX11,E2F7,TNFRSF12A,CTHRC1,EPHB3,EIF4EBP1,FOXM1,FN1,DHCR7,STAT1,S100A7,STIL,EDN2,AARD,FOXC1,SDC1,ESM1,GJB2,TYMP,KIF26B,CXCR4,HTATIP2,CFL1,TIMELESS,ADAM8,MTHFD1L,GREM1,E2F8
GO:0009615	Response to virus	20	293	0.39	0.0148	9606.ENSP00000228928,9606.ENSP00000257570,9606.ENSP00000280326,9606.ENSP00000284878,9606.ENSP00000305651,9606.ENSP00000306565,9606.ENSP00000326119,9606.ENSP00000327459,9606.ENSP00000342278,9606.ENSP00000342513,9606.ENSP00000354394,9606.ENSP00000354901,9606.ENSP00000359787,9606.ENSP00000362108,9606.ENSP00000368699,9606.ENSP00000371471,9606.ENSP00000386884,9606.ENSP00000399888,9606.ENSP00000410452,…	OAS3,OASL,CCT5,CXADR,CXCL10,ISG20,PMAIP1,APOBEC3B,OAS2,IFI6,STAT1,CXCL9,IFI44L,LCN2,ISG15,RSAD2,CXCR4,HMGA1,STMN1,CFL1
GO:0051272	Positive regulation of cellular component movement	31	561	0.3	0.0148	9606.ENSP00000216117,9606.ENSP00000219150,9606.ENSP00000225655,9606.ENSP00000225964,9606.ENSP00000250160,9606.ENSP00000263735,9606.ENSP00000264832,9606.ENSP00000271638,9606.ENSP00000274793,9606.ENSP00000284240,9606.ENSP00000286758,9606.ENSP00000302569,9606.ENSP00000305651,9606.ENSP00000306512,9606.ENSP00000320866,9606.ENSP00000346839,9606.ENSP00000351671,9606.ENSP00000357712,9606.ENSP00000361405,…	HMOX1,CORO1A,PFN1,COL1A1,WISP1,EPCAM,ICAM1,S100A11,PLA2G7,THY1,CXCL13,CLEC7A,CXCL10,CXCL8,CALR,FN1,CCL20,S100A7,MMP9,EDN2,PLAU,SPOCK2,POSTN,FAM83H,CXCR4,TSTA3,STMN1,LRRC15,ADAM8,ITGAX,ENSG00000158164
GO:0034641	Cellular nitrogen compound metabolic process	122	3282	0.13	0.0151	9606.ENSP00000166345,9606.ENSP00000209728,9606.ENSP00000216117,9606.ENSP00000216122,9606.ENSP00000218230,9606.ENSP00000221486,9606.ENSP00000228843,9606.ENSP00000228928,9606.ENSP00000229239,9606.ENSP00000229270,9606.ENSP00000240488,9606.ENSP00000242776,9606.ENSP00000256442,9606.ENSP00000256722,9606.ENSP00000258729,9606.ENSP00000259008,9606.ENSP00000260102,9606.ENSP00000260118,9606.ENSP00000262105,…	TRIP13,CDC6,HMOX1,MCM5,PCSK1N,RNASEH2A,RAD51AP1,OAS3,GAPDH,TPI1,MND1,DDX39A,CCNB1,CMPK2,IGF2BP3,BRIP1,MRPL15,GGH,MCM4,CCNE1,E2F3,MCM6,POLQ,NEIL3,MCM2,SNRPG,CDCA5,RPL39L,HMGB2,RAD21,KIAA0101,CHAF1A,TK1,FEN1,MRPL13,ISG20,RMI2,FANCI,CLSPN,TYMS,GEN1,EZH2,PKM,APOBEC3B,PIF1,LIN9,IDH2,SHMT2,NME1,EIF4EBP1,ETV7,OAS2,FOXM1,E2F1,HIST1H4J,BLM,DNMT1,RRM2,WDHD1,PNP,ILF2,HORMAD1,E2F2,EXO1,HIST3H2A,PARP1,EPRS,CE…
GO:0040017	Positive regulation of locomotion	31	562	0.3	0.0151	9606.ENSP00000216117,9606.ENSP00000219150,9606.ENSP00000225655,9606.ENSP00000225964,9606.ENSP00000250160,9606.ENSP00000263735,9606.ENSP00000264832,9606.ENSP00000271638,9606.ENSP00000274793,9606.ENSP00000284240,9606.ENSP00000286758,9606.ENSP00000302569,9606.ENSP00000305651,9606.ENSP00000306512,9606.ENSP00000320866,9606.ENSP00000346839,9606.ENSP00000351671,9606.ENSP00000357712,9606.ENSP00000361405,…	HMOX1,CORO1A,PFN1,COL1A1,WISP1,EPCAM,ICAM1,S100A11,PLA2G7,THY1,CXCL13,CLEC7A,CXCL10,CXCL8,CALR,FN1,CCL20,S100A7,MMP9,EDN2,PLAU,SPOCK2,POSTN,FAM83H,CXCR4,ARTN,TSTA3,LRRC15,ADAM8,ITGAX,ENSG00000158164
GO:2000134	Negative regulation of g1/s transition of mitotic cell cycle	11	107	0.57	0.0151	9606.ENSP00000216911,9606.ENSP00000244745,9606.ENSP00000256442,9606.ENSP00000320147,9606.ENSP00000321656,9606.ENSP00000323246,9606.ENSP00000345571,9606.ENSP00000368458,9606.ENSP00000378699,9606.ENSP00000418915,9606.ENSP00000481103	AURKA,SOX4,CCNB1,EZH2,CDC25C,E2F7,E2F1,PCNA,CDK1,CDKN2A,E2F8
GO:0007143	Female meiotic nuclear division	6	30	0.86	0.0158	9606.ENSP00000166345,9606.ENSP00000216911,9606.ENSP00000240423,9606.ENSP00000300093,9606.ENSP00000358813,9606.ENSP00000411532	TRIP13,AURKA,NCAPH,PLK1,TTK,TOP2A
GO:0038111	interleukin-7-mediated signaling pathway	6	30	0.86	0.0158	9606.ENSP00000333277,9606.ENSP00000352252,9606.ENSP00000358154,9606.ENSP00000366999,9606.ENSP00000385479,9606.ENSP00000395654	HIST2H3D,HIST1H3J,HIST2H3C,HIST1H3D,HIST2H3A,SMARCA4
GO:0044380	Protein localization to cytoskeleton	7	43	0.77	0.0158	9606.ENSP00000216911,9606.ENSP00000265748,9606.ENSP00000323300,9606.ENSP00000358813,9606.ENSP00000360944,9606.ENSP00000373565,9606.ENSP00000481110	AURKA,ANLN,SPAG5,TTK,STIL,FAM83H,FAM83D
GO:0050793	Regulation of developmental process	102	2648	0.15	0.0158	9606.ENSP00000215743,9606.ENSP00000215754,9606.ENSP00000216117,9606.ENSP00000216911,9606.ENSP00000219150,9606.ENSP00000222271,9606.ENSP00000225655,9606.ENSP00000225964,9606.ENSP00000226279,9606.ENSP00000242208,9606.ENSP00000244745,9606.ENSP00000250160,9606.ENSP00000256442,9606.ENSP00000260128,9606.ENSP00000262629,9606.ENSP00000264246,9606.ENSP00000264832,9606.ENSP00000265643,9606.ENSP00000272937,…	MMP11,MIF,HMOX1,AURKA,CORO1A,COMP,PFN1,COL1A1,CD38,INHBA,SOX4,WISP1,CCNB1,SULF1,TYROBP,CD80,ICAM1,GAL,HES6,THY1,CXADR,CXCL13,SLAMF8,HMGB2,CLEC7A,LRP8,CTLA4,RAC3,CXCL10,CXCL8,EZH2,PKM,CALR,SOX11,TNFRSF12A,P4HB,CTHRC1,IDH2,CD86,EPHB3,HIST2H3D,NME1,OAS2,FOXM1,E2F1,FN1,HIST1H4J,HIST1H3J,DNMT1,STAT1,IQGAP3,PNP,CXCL9,E2F2,PARP1,CENPF,KIF14,ASPM,S100A9,HIST2H3C,HMGB3,MMP9,CDC20,SPOCK2,PGK1,DKK1,RCC2,BAM…
GO:0016032	Viral process	39	776	0.26	0.0162	9606.ENSP00000254508,9606.ENSP00000264246,9606.ENSP00000264832,9606.ENSP00000274026,9606.ENSP00000281453,9606.ENSP00000284878,9606.ENSP00000302530,9606.ENSP00000321656,9606.ENSP00000322788,9606.ENSP00000332049,9606.ENSP00000336868,9606.ENSP00000345571,9606.ENSP00000345672,9606.ENSP00000346206,9606.ENSP00000354394,9606.ENSP00000356991,9606.ENSP00000358997,9606.ENSP00000360671,9606.ENSP00000362931,…	NUP210,CD80,ICAM1,CCNA2,CENPU,CXADR,BUB1,CDC25C,MMP1,CD86,CENPA,E2F1,CTSB,TAP1,STAT1,PVRL4,IRAK1,SLC25A5,SRPK1,RCC1,TAP2,HLA-C,PCNA,ISG15,RSAD2,CDK1,HLA-DRA,CXCR4,HTATIP2,HLA-B,HMGA1,RANBP1,LRRC15,ALYREF,H2AFX,SLC52A2,KPNA2,DDX11,CLEC5A
GO:0012501	Programmed cell death	49	1054	0.23	0.0166	9606.ENSP00000209718,9606.ENSP00000216117,9606.ENSP00000216341,9606.ENSP00000222271,9606.ENSP00000226279,9606.ENSP00000229239,9606.ENSP00000242208,9606.ENSP00000252252,9606.ENSP00000257934,9606.ENSP00000260128,9606.ENSP00000262629,9606.ENSP00000265056,9606.ENSP00000266263,9606.ENSP00000267953,9606.ENSP00000276708,9606.ENSP00000278742,9606.ENSP00000280904,9606.ENSP00000287598,9606.ENSP00000296503,…	KRT23,HMOX1,GZMB,COMP,CD38,GAPDH,INHBA,KRT6B,ESPL1,SULF1,TYROBP,MCM2,MTFP1,BCL2A1,GSDMC,ST14,DSC2,BUB1B,HMGB2,RAD21,MELK,TPX2,EVPL,BIRC5,KRT16,BUB1,CDCA7,PKM,PMAIP1,TNFRSF12A,IFI6,E2F1,E2F2,PARP1,S100A8,S100A9,LCN2,CKAP2,KRT6A,KRT81,CIT,MST4,CDK1,CXCR4,HTATIP2,TOP2A,CDKN2A,PRAME,GREM1
GO:0045055	Regulated exocytosis	36	697	0.27	0.0167	9606.ENSP00000215754,9606.ENSP00000219150,9606.ENSP00000236147,9606.ENSP00000236671,9606.ENSP00000250092,9606.ENSP00000260118,9606.ENSP00000261267,9606.ENSP00000262428,9606.ENSP00000262629,9606.ENSP00000271638,9606.ENSP00000289902,9606.ENSP00000291568,9606.ENSP00000296370,9606.ENSP00000320171,9606.ENSP00000339001,9606.ENSP00000339328,9606.ENSP00000344829,9606.ENSP00000345672,9606.ENSP00000346839,…	MIF,CORO1A,SELL,CTSD,CD68,GGH,LYZ,COTL1,TYROBP,S100A11,FCER1G,CSTB,S100P,PKM,TUBB,PLAUR,QPCT,CTSB,FN1,PNP,ILF2,S100A7,S100A8,S100A9,CTSS,MMP9,PLAU,LCN2,HLA-C,CKAP4,PRDX4,CALML5,HLA-B,CLEC5A,ADAM8,ITGAX
GO:0043549	Regulation of kinase activity	44	918	0.24	0.018	9606.ENSP00000209728,9606.ENSP00000215754,9606.ENSP00000256442,9606.ENSP00000262300,9606.ENSP00000262643,9606.ENSP00000265148,9606.ENSP00000265728,9606.ENSP00000274026,9606.ENSP00000284240,9606.ENSP00000284440,9606.ENSP00000288207,9606.ENSP00000289707,9606.ENSP00000300093,9606.ENSP00000300403,9606.ENSP00000303634,9606.ENSP00000303706,9606.ENSP00000305651,9606.ENSP00000311083,9606.ENSP00000312995,…	CDC6,MIF,CCNB1,PKMYT1,CCNE1,CENPE,DBF4,CCNA2,THY1,UCHL1,CCNB2,SLAMF8,PLK1,TPX2,LRP8,CDC25A,CXCL10,CKS1B,CLSPN,EZH2,CDC25C,CD86,EPHB3,CDKN3,BLM,IQGAP3,KIF14,FCGR1A,PSRC1,IRAK1,DKK1,MAGED1,CKS2,MST4,INCENP,CDK1,CXCR4,NCAPG2,CDKN2A,PBK,CCNE2,ADAM8,DBNDD1,GREM1
GO:0016572	Histone phosphorylation	6	31	0.85	0.0182	9606.ENSP00000216911,9606.ENSP00000256442,9606.ENSP00000274026,9606.ENSP00000313950,9606.ENSP00000378295,9606.ENSP00000378699	AURKA,CCNB1,CCNA2,AURKB,INCENP,CDK1
GO:0019885	Antigen processing and presentation of endogenous peptide antigen via mhc class i	4	10	1.16	0.0182	9606.ENSP00000346206,9606.ENSP00000364034,9606.ENSP00000365402,9606.ENSP00000399168	TAP1,TAP2,HLA-C,HLA-B
GO:0031100	Animal organ regeneration	9	75	0.64	0.0182	9606.ENSP00000216117,9606.ENSP00000216911,9606.ENSP00000274026,9606.ENSP00000315644,9606.ENSP00000320147,9606.ENSP00000320171,9606.ENSP00000368458,9606.ENSP00000378699,9606.ENSP00000381581	HMOX1,AURKA,CCNA2,TYMS,EZH2,PKM,PCNA,CDK1,LCP1
GO:0007275	Multicellular organism development	174	5023	0.1	0.0183	9606.ENSP00000209718,9606.ENSP00000215743,9606.ENSP00000216117,9606.ENSP00000216911,9606.ENSP00000217086,9606.ENSP00000222271,9606.ENSP00000225655,9606.ENSP00000225964,9606.ENSP00000226279,9606.ENSP00000226284,9606.ENSP00000229270,9606.ENSP00000230321,9606.ENSP00000242208,9606.ENSP00000244745,9606.ENSP00000250160,9606.ENSP00000252252,9606.ENSP00000256442,9606.ENSP00000257527,9606.ENSP00000258729,…	KRT23,MMP11,HMOX1,AURKA,SALL4,COMP,PFN1,COL1A1,CD38,IBSP,TPI1,MDFI,INHBA,SOX4,WISP1,KRT6B,CCNB1,ADAM19,IGF2BP3,BRIP1,SULF1,MMP13,TYROBP,PRDX1,KIF18A,ASF1B,EPCAM,CAPG,POLQ,ICAM1,MCM2,CENPE,PITX1,GAL,ANLN,BCL2A1,PLK4,HES6,CCNA2,ST14,DSC2,CENPU,OTX1,THY1,UCHL1,CXADR,CCNB2,SLAMF8,FCER1G,EN1,POC1A,HMGB2,RAD21,MELK,EVPL,KRT16,LRP8,RAC3,CXCL10,GPRIN1,CXCL8,CBX2,AURKB,TYMS,EZH2,PKM,CALR,SOX11,E2F7,TACC3,…
GO:0046605	Regulation of centrosome cycle	8	60	0.68	0.0196	9606.ENSP00000216911,9606.ENSP00000260731,9606.ENSP00000270861,9606.ENSP00000296484,9606.ENSP00000318977,9606.ENSP00000355966,9606.ENSP00000360944,9606.ENSP00000401564	AURKA,KIF11,PLK4,POC1A,GEN1,NEK2,STIL,RANBP1
GO:0048731	System development	156	4426	0.11	0.0196	9606.ENSP00000209718,9606.ENSP00000216117,9606.ENSP00000216911,9606.ENSP00000217086,9606.ENSP00000222271,9606.ENSP00000225655,9606.ENSP00000225964,9606.ENSP00000226279,9606.ENSP00000226284,9606.ENSP00000230321,9606.ENSP00000242208,9606.ENSP00000244745,9606.ENSP00000250160,9606.ENSP00000252252,9606.ENSP00000256442,9606.ENSP00000257527,9606.ENSP00000258729,9606.ENSP00000259008,9606.ENSP00000260128,…	KRT23,HMOX1,AURKA,SALL4,COMP,PFN1,COL1A1,CD38,IBSP,MDFI,INHBA,SOX4,WISP1,KRT6B,CCNB1,ADAM19,IGF2BP3,BRIP1,SULF1,MMP13,TYROBP,PRDX1,KIF18A,EPCAM,CAPG,POLQ,ICAM1,MCM2,PITX1,GAL,ANLN,BCL2A1,PLK4,HES6,CCNA2,ST14,DSC2,OTX1,THY1,UCHL1,CXADR,CCNB2,SLAMF8,FCER1G,EN1,POC1A,HMGB2,MELK,EVPL,KRT16,LRP8,RAC3,CXCL10,GPRIN1,CXCL8,TYMS,EZH2,PKM,CALR,SOX11,E2F7,TACC3,TNFRSF12A,BGN,COL10A1,HIST1H1B,CTHRC1,IDH2,EPH…
GO:2000147	Positive regulation of cell motility	30	547	0.3	0.0196	9606.ENSP00000216117,9606.ENSP00000219150,9606.ENSP00000225655,9606.ENSP00000225964,9606.ENSP00000250160,9606.ENSP00000263735,9606.ENSP00000264832,9606.ENSP00000271638,9606.ENSP00000274793,9606.ENSP00000284240,9606.ENSP00000286758,9606.ENSP00000302569,9606.ENSP00000305651,9606.ENSP00000306512,9606.ENSP00000320866,9606.ENSP00000346839,9606.ENSP00000351671,9606.ENSP00000357712,9606.ENSP00000361405,…	HMOX1,CORO1A,PFN1,COL1A1,WISP1,EPCAM,ICAM1,S100A11,PLA2G7,THY1,CXCL13,CLEC7A,CXCL10,CXCL8,CALR,FN1,CCL20,S100A7,MMP9,EDN2,PLAU,SPOCK2,POSTN,FAM83H,CXCR4,TSTA3,LRRC15,ADAM8,ITGAX,ENSG00000158164
GO:0051098	Regulation of binding	23	373	0.35	0.02	9606.ENSP00000216117,9606.ENSP00000216911,9606.ENSP00000230321,9606.ENSP00000275517,9606.ENSP00000296503,9606.ENSP00000300093,9606.ENSP00000301019,9606.ENSP00000313950,9606.ENSP00000322568,9606.ENSP00000330523,9606.ENSP00000337060,9606.ENSP00000339328,9606.ENSP00000345571,9606.ENSP00000355759,9606.ENSP00000355966,9606.ENSP00000361405,9606.ENSP00000363081,9606.ENSP00000364683,9606.ENSP00000370256,…	HMOX1,AURKA,MDFI,CDCA5,HMGB2,PLK1,CDT1,AURKB,SOX11,CTHRC1,NME1,PLAUR,E2F1,PARP1,NEK2,MMP9,DKK1,BAMBI,FOXC1,STMN1,HJURP,IL32,DDX11
GO:0050869	Negative regulation of b cell activation	6	32	0.83	0.0205	9606.ENSP00000242208,9606.ENSP00000262629,9606.ENSP00000285670,9606.ENSP00000303939,9606.ENSP00000359393,9606.ENSP00000418915	INHBA,TYROBP,SAMSN1,CTLA4,HMGB3,CDKN2A
GO:0051701	Interaction with host	13	151	0.49	0.0209	9606.ENSP00000229239,9606.ENSP00000264246,9606.ENSP00000264832,9606.ENSP00000284878,9606.ENSP00000332049,9606.ENSP00000345672,9606.ENSP00000356991,9606.ENSP00000378699,9606.ENSP00000386884,9606.ENSP00000421592,9606.ENSP00000436768,9606.ENSP00000438483,9606.ENSP00000449999	GAPDH,CD80,ICAM1,CXADR,CD86,CTSB,PVRL4,CDK1,CXCR4,ALYREF,SLC52A2,KPNA2,CLEC5A
GO:0031325	Positive regulation of cellular metabolic process	125	3413	0.12	0.0212	9606.ENSP00000209728,9606.ENSP00000215754,9606.ENSP00000216117,9606.ENSP00000216127,9606.ENSP00000216911,9606.ENSP00000217026,9606.ENSP00000217086,9606.ENSP00000225964,9606.ENSP00000226279,9606.ENSP00000233893,9606.ENSP00000236671,9606.ENSP00000239940,9606.ENSP00000242208,9606.ENSP00000244534,9606.ENSP00000244573,9606.ENSP00000244745,9606.ENSP00000247191,9606.ENSP00000256442,9606.ENSP00000257934,…	CDC6,MIF,HMOX1,RASD2,AURKA,MYBL2,SALL4,COL1A1,CD38,HSPE1,CTSD,PFN2,INHBA,HIST1H1D,HIST1H1A,SOX4,DLGAP5,CCNB1,ESPL1,CDK2AP1,TYROBP,CCNE1,E2F3,EPCAM,CD80,UBE2S,ICAM1,CENPE,PITX1,TFEC,GAL,DBF4,ARNTL2,CCNA2,CCT5,OTX1,ATAD2,EN1,CCT3,H2AFZ,HMGB2,PLK1,TPX2,CDT1,CLEC7A,LRP8,CXCL10,HIST1H1E,FANCI,CKS1B,CLSPN,AURKB,EZH2,DSCC1,SOX11,E2F7,PMAIP1,CDCA2,HIST1H1B,CD86,EPHB3,CDCA4,PLAUR,HIST1H1C,FOXM1,E2F1,FN1,B…
GO:0045071	Negative regulation of viral genome replication	8	61	0.68	0.0214	9606.ENSP00000228928,9606.ENSP00000257570,9606.ENSP00000306565,9606.ENSP00000327459,9606.ENSP00000342278,9606.ENSP00000362931,9606.ENSP00000368699,9606.ENSP00000371471	OAS3,OASL,ISG20,APOBEC3B,OAS2,SRPK1,ISG15,RSAD2
GO:0002683	Negative regulation of immune system process	26	450	0.32	0.022	9606.ENSP00000215754,9606.ENSP00000216117,9606.ENSP00000242208,9606.ENSP00000250092,9606.ENSP00000262629,9606.ENSP00000264246,9606.ENSP00000265643,9606.ENSP00000284240,9606.ENSP00000285670,9606.ENSP00000289707,9606.ENSP00000289902,9606.ENSP00000303939,9606.ENSP00000322568,9606.ENSP00000332049,9606.ENSP00000337060,9606.ENSP00000347168,9606.ENSP00000359393,9606.ENSP00000366956,9606.ENSP00000367034,…	MIF,HMOX1,INHBA,CD68,TYROBP,CD80,GAL,THY1,SAMSN1,SLAMF8,FCER1G,CTLA4,SOX11,CD86,NME1,HIST1H4J,HMGB3,HIST1H4H,HIST1H4C,LILRB4,RUNX3,NCAPG2,HLA-B,CDKN2A,IDO1,GREM1
GO:0046718	Viral entry into host cell	10	95	0.58	0.022	9606.ENSP00000264246,9606.ENSP00000264832,9606.ENSP00000284878,9606.ENSP00000332049,9606.ENSP00000345672,9606.ENSP00000356991,9606.ENSP00000378699,9606.ENSP00000386884,9606.ENSP00000436768,9606.ENSP00000449999	CD80,ICAM1,CXADR,CD86,CTSB,PVRL4,CDK1,CXCR4,SLC52A2,CLEC5A
GO:0045815	Positive regulation of gene expression, epigenetic	8	62	0.67	0.0232	9606.ENSP00000244534,9606.ENSP00000244573,9606.ENSP00000287394,9606.ENSP00000307705,9606.ENSP00000330074,9606.ENSP00000337226,9606.ENSP00000339566,9606.ENSP00000399888	HIST1H1D,HIST1H1A,ATAD2,HIST1H1E,HIST1H1B,CDCA4,HIST1H1C,HMGA1
GO:0051238	Sequestering of metal ion	4	11	1.12	0.0232	9606.ENSP00000357712,9606.ENSP00000357722,9606.ENSP00000357727,9606.ENSP00000362108	S100A7,S100A8,S100A9,LCN2
GO:1903900	Regulation of viral life cycle	13	153	0.49	0.0232	9606.ENSP00000228928,9606.ENSP00000257570,9606.ENSP00000306512,9606.ENSP00000306565,9606.ENSP00000327459,9606.ENSP00000327801,9606.ENSP00000342278,9606.ENSP00000362931,9606.ENSP00000368699,9606.ENSP00000371471,9606.ENSP00000411532,9606.ENSP00000432218,9606.ENSP00000438483	OAS3,OASL,CXCL8,ISG20,APOBEC3B,P4HB,OAS2,SRPK1,ISG15,RSAD2,TOP2A,IL32,KPNA2
GO:0010569	Regulation of double-strand break repair via homologous recombination	7	47	0.73	0.0237	9606.ENSP00000228843,9606.ENSP00000264233,9606.ENSP00000310356,9606.ENSP00000355759,9606.ENSP00000372088,9606.ENSP00000381378,9606.ENSP00000450607	RAD51AP1,POLQ,RMI2,PARP1,RAD51,FANCB,TIMELESS
GO:0044237	Cellular metabolic process	245	7513	0.07	0.0241	9606.ENSP00000005286,9606.ENSP00000166345,9606.ENSP00000209728,9606.ENSP00000215754,9606.ENSP00000215794,9606.ENSP00000216117,9606.ENSP00000216122,9606.ENSP00000216911,9606.ENSP00000218230,9606.ENSP00000221486,9606.ENSP00000228843,9606.ENSP00000228928,9606.ENSP00000229239,9606.ENSP00000229270,9606.ENSP00000240488,9606.ENSP00000242208,9606.ENSP00000242776,9606.ENSP00000244534,9606.ENSP00000248958,…	TMEM132A,TRIP13,CDC6,MIF,USP18,HMOX1,MCM5,AURKA,PCSK1N,RNASEH2A,RAD51AP1,OAS3,GAPDH,TPI1,MND1,INHBA,DDX39A,HIST1H1D,SDF2L1,NUP210,CCNB1,CMPK2,IGF2BP3,BRIP1,CLPS,MRPL15,GGH,SULF1,MMP13,LYZ,CDK2AP1,MCM4,PKMYT1,IL12RB2,CCNE1,PRDX1,E2F3,MCM6,POLQ,UBE2S,NEIL3,MCM2,DBF4,SQLE,PLK4,SNRPG,CCNA2,PLA2G7,CDCA5,NDUFB9,FADS2,THY1,UCHL1,BUB1B,HIST1H2BD,FCER1G,RPL39L,HMGB2,MAD2L1,RAD21,MELK,KIAA0101,PLK1,CDT1,CH…
GO:1905268	Negative regulation of chromatin organization	8	63	0.66	0.0254	9606.ENSP00000244534,9606.ENSP00000244573,9606.ENSP00000287394,9606.ENSP00000307705,9606.ENSP00000330074,9606.ENSP00000339566,9606.ENSP00000352516,9606.ENSP00000399888	HIST1H1D,HIST1H1A,ATAD2,HIST1H1E,HIST1H1B,HIST1H1C,DNMT1,HMGA1
GO:1902975	Mitotic dna replication initiation	3	4	1.43	0.0256	9606.ENSP00000262105,9606.ENSP00000265056,9606.ENSP00000480987	MCM4,MCM2,MCM3
GO:0051781	Positive regulation of cell division	11	117	0.53	0.0275	9606.ENSP00000209728,9606.ENSP00000216911,9606.ENSP00000247191,9606.ENSP00000257934,9606.ENSP00000260363,9606.ENSP00000313950,9606.ENSP00000356319,9606.ENSP00000357189,9606.ENSP00000376306,9606.ENSP00000404190,9606.ENSP00000453403	CDC6,AURKA,DLGAP5,ESPL1,KIF23,AURKB,KIF14,HDGF,CIT,RACGAP1,NUSAP1
GO:0045069	Regulation of viral genome replication	10	99	0.56	0.0287	9606.ENSP00000228928,9606.ENSP00000257570,9606.ENSP00000306512,9606.ENSP00000306565,9606.ENSP00000327459,9606.ENSP00000342278,9606.ENSP00000362931,9606.ENSP00000368699,9606.ENSP00000371471,9606.ENSP00000411532	OAS3,OASL,CXCL8,ISG20,APOBEC3B,OAS2,SRPK1,ISG15,RSAD2,TOP2A
GO:0007077	Mitotic nuclear envelope disassembly	4	12	1.08	0.0294	9606.ENSP00000256442,9606.ENSP00000288207,9606.ENSP00000300093,9606.ENSP00000378699	CCNB1,CCNB2,PLK1,CDK1
GO:0051054	Positive regulation of dna metabolic process	15	200	0.43	0.0296	9606.ENSP00000280326,9606.ENSP00000295688,9606.ENSP00000313950,9606.ENSP00000322180,9606.ENSP00000342307,9606.ENSP00000355759,9606.ENSP00000355966,9606.ENSP00000368458,9606.ENSP00000372088,9606.ENSP00000376272,9606.ENSP00000381378,9606.ENSP00000434024,9606.ENSP00000440402,9606.ENSP00000450607,9606.ENSP00000478319	CCT5,CCT3,AURKB,DSCC1,FOXM1,PARP1,NEK2,PCNA,RAD51,RFC4,FANCB,H2AFX,DDX11,TIMELESS,GREM1
GO:0045652	Regulation of megakaryocyte differentiation	9	82	0.6	0.0304	9606.ENSP00000296503,9606.ENSP00000333277,9606.ENSP00000347168,9606.ENSP00000352252,9606.ENSP00000358154,9606.ENSP00000366956,9606.ENSP00000366999,9606.ENSP00000367034,9606.ENSP00000385479	HMGB2,HIST2H3D,HIST1H4J,HIST1H3J,HIST2H3C,HIST1H4H,HIST1H3D,HIST1H4C,HIST2H3A
GO:2000112	Regulation of cellular macromolecule biosynthetic process	138	3878	0.11	0.0309	9606.ENSP00000209728,9606.ENSP00000216117,9606.ENSP00000216341,9606.ENSP00000217026,9606.ENSP00000217086,9606.ENSP00000225655,9606.ENSP00000225964,9606.ENSP00000226279,9606.ENSP00000229239,9606.ENSP00000230321,9606.ENSP00000242208,9606.ENSP00000244534,9606.ENSP00000244573,9606.ENSP00000244745,9606.ENSP00000247191,9606.ENSP00000258729,9606.ENSP00000259008,9606.ENSP00000262643,9606.ENSP00000262904,…	CDC6,HMOX1,GZMB,MYBL2,SALL4,PFN1,COL1A1,CD38,GAPDH,MDFI,INHBA,HIST1H1D,HIST1H1A,SOX4,DLGAP5,IGF2BP3,BRIP1,CCNE1,E2F3,EPCAM,CD80,ICAM1,PITX1,TFEC,GAL,DBF4,ARNTL2,S100A11,HES6,CCNA2,NFKBIE,CCT5,OTX1,ATAD2,EN1,CCT3,H2AFZ,HMGB2,RAD21,PLK1,CDT1,BIRC5,LRP8,CXCL10,MRPL13,CDCA7,HIST1H1E,CBX2,CKS1B,AURKB,TYMS,EZH2,CALR,DSCC1,SOX11,E2F7,PIF1,LIN9,HIST1H1B,CD86,HIST2H2AB,HIST2H3D,SHMT2,CDCA4,HIST1H1C,EIF4EB…
GO:0006954	Inflammatory response	28	515	0.3	0.0321	9606.ENSP00000215754,9606.ENSP00000216117,9606.ENSP00000250092,9606.ENSP00000261267,9606.ENSP00000262629,9606.ENSP00000264832,9606.ENSP00000265643,9606.ENSP00000286758,9606.ENSP00000289707,9606.ENSP00000289902,9606.ENSP00000296503,9606.ENSP00000301653,9606.ENSP00000302569,9606.ENSP00000305651,9606.ENSP00000306512,9606.ENSP00000306884,9606.ENSP00000341821,9606.ENSP00000346839,9606.ENSP00000351671,…	MIF,HMOX1,CD68,LYZ,TYROBP,ICAM1,GAL,CXCL13,SLAMF8,FCER1G,HMGB2,KRT16,CLEC7A,CXCL10,CXCL8,CXCL11,FPR3,FN1,CCL20,CXCL9,S100A8,S100A9,GBP5,SDC1,SPP1,CXCR4,IDO1,ADAM8
GO:0019219	Regulation of nucleobase-containing compound metabolic process	141	3982	0.11	0.0322	9606.ENSP00000166345,9606.ENSP00000209728,9606.ENSP00000216117,9606.ENSP00000217026,9606.ENSP00000217086,9606.ENSP00000225655,9606.ENSP00000225964,9606.ENSP00000226279,9606.ENSP00000228843,9606.ENSP00000228928,9606.ENSP00000230321,9606.ENSP00000242208,9606.ENSP00000244534,9606.ENSP00000244573,9606.ENSP00000244745,9606.ENSP00000247191,9606.ENSP00000254508,9606.ENSP00000256442,9606.ENSP00000257570,…	TRIP13,CDC6,HMOX1,MYBL2,SALL4,PFN1,COL1A1,CD38,RAD51AP1,OAS3,MDFI,INHBA,HIST1H1D,HIST1H1A,SOX4,DLGAP5,NUP210,CCNB1,OASL,IGF2BP3,BRIP1,CCNE1,E2F3,EPCAM,POLQ,CD80,ICAM1,PITX1,TFEC,GAL,ARNTL2,HES6,CCNA2,NFKBIE,CCT5,OTX1,ATAD2,EN1,CCT3,H2AFZ,HMGB2,RAD21,PLK1,CDT1,BIRC5,LRP8,CXCL10,CDCA7,HIST1H1E,CBX2,RMI2,CKS1B,AURKB,TYMS,EZH2,CALR,DSCC1,SOX11,E2F7,PIF1,LIN9,HIST1H1B,CD86,HIST2H2AB,HIST2H3D,CDCA4,HIS…
GO:0032502	Developmental process	196	5841	0.09	0.0322	9606.ENSP00000166345,9606.ENSP00000209718,9606.ENSP00000215743,9606.ENSP00000215754,9606.ENSP00000216117,9606.ENSP00000216911,9606.ENSP00000217086,9606.ENSP00000222271,9606.ENSP00000225655,9606.ENSP00000225964,9606.ENSP00000226279,9606.ENSP00000226284,9606.ENSP00000229270,9606.ENSP00000230321,9606.ENSP00000233893,9606.ENSP00000242208,9606.ENSP00000244573,9606.ENSP00000244745,9606.ENSP00000250092,…	TRIP13,KRT23,MMP11,MIF,HMOX1,AURKA,SALL4,COMP,PFN1,COL1A1,CD38,IBSP,TPI1,MDFI,HSPE1,INHBA,HIST1H1A,SOX4,CD68,WISP1,KRT6B,CCNB1,ADAM19,IGF2BP3,BRIP1,SULF1,MMP7,MMP13,TYROBP,PRDX1,KIF18A,ASF1B,EPCAM,CAPG,POLQ,ICAM1,MCM2,CENPE,PITX1,GAL,ANLN,BCL2A1,SECTM1,PLK4,HES6,CCNA2,ST14,DSC2,CENPU,OTX1,THY1,UCHL1,CXADR,CXCL13,CCNB2,SLAMF8,FCER1G,EN1,KIAA1524,RPL39L,POC1A,HMGB2,RAD21,MELK,EVPL,KRT16,LRP8,RAC3,C…
GO:0022617	Extracellular matrix disassembly	8	66	0.64	0.0324	9606.ENSP00000215743,9606.ENSP00000260227,9606.ENSP00000260302,9606.ENSP00000322788,9606.ENSP00000357981,9606.ENSP00000361405,9606.ENSP00000381581,9606.ENSP00000453302	MMP11,MMP7,MMP13,MMP1,CTSS,MMP9,LCP1,ADAM8
GO:0071897	DNA biosynthetic process	10	101	0.56	0.0324	9606.ENSP00000264233,9606.ENSP00000300035,9606.ENSP00000301634,9606.ENSP00000315644,9606.ENSP00000329102,9606.ENSP00000355922,9606.ENSP00000355958,9606.ENSP00000368458,9606.ENSP00000368699,9606.ENSP00000376272	POLQ,KIAA0101,TK1,TYMS,LIN9,CENPF,DTL,PCNA,ISG15,RFC4
GO:1901700	Response to oxygen-containing compound	65	1567	0.18	0.0336	9606.ENSP00000209728,9606.ENSP00000216117,9606.ENSP00000225964,9606.ENSP00000226279,9606.ENSP00000236147,9606.ENSP00000242208,9606.ENSP00000244745,9606.ENSP00000250092,9606.ENSP00000256442,9606.ENSP00000256722,9606.ENSP00000259008,9606.ENSP00000260118,9606.ENSP00000260302,9606.ENSP00000262345,9606.ENSP00000262746,9606.ENSP00000263181,9606.ENSP00000264246,9606.ENSP00000264832,9606.ENSP00000265643,…	CDC6,HMOX1,COL1A1,CD38,SELL,INHBA,SOX4,CD68,CCNB1,CMPK2,BRIP1,GGH,MMP13,IL12RB2,PRDX1,KIF18A,CD80,ICAM1,GAL,CCNA2,CXCL13,H2AFZ,HMGB2,CDT1,CLEC7A,LRP8,CXCL10,CXCL8,CXCL11,TYMS,EZH2,PKM,CALR,CD86,SHMT2,NME1,EIF4EBP1,E2F1,BLM,DNMT1,STAT1,CXCL9,PARP1,EPRS,S100A7,S100A8,RGS10,IRAK1,MMP9,LCN2,DKK1,PCNA,POSTN,SDC1,RAD51,GJB2,MST4,SPP1,CDK1,SLC2A1,IDO1,CFL1,DDX11,TDO2,TIMELESS
GO:0051235	Maintenance of location	13	161	0.47	0.0342	9606.ENSP00000230321,9606.ENSP00000233143,9606.ENSP00000265896,9606.ENSP00000275015,9606.ENSP00000320866,9606.ENSP00000356379,9606.ENSP00000357712,9606.ENSP00000357722,9606.ENSP00000357727,9606.ENSP00000362108,9606.ENSP00000386239,9606.ENSP00000424571,9606.ENSP00000472749	MDFI,TMSB10,SQLE,NFKBIE,CALR,ASPM,S100A7,S100A8,S100A9,LCN2,TONSL,FBN2,ENSG00000158164
GO:2000779	Regulation of double-strand break repair	9	84	0.59	0.0348	9606.ENSP00000228843,9606.ENSP00000264233,9606.ENSP00000310356,9606.ENSP00000342307,9606.ENSP00000355759,9606.ENSP00000372088,9606.ENSP00000381378,9606.ENSP00000440402,9606.ENSP00000450607	RAD51AP1,POLQ,RMI2,FOXM1,PARP1,RAD51,FANCB,DDX11,TIMELESS
GO:0051173	Positive regulation of nitrogen compound metabolic process	118	3239	0.12	0.036	9606.ENSP00000209728,9606.ENSP00000215754,9606.ENSP00000216127,9606.ENSP00000216911,9606.ENSP00000217026,9606.ENSP00000217086,9606.ENSP00000225964,9606.ENSP00000226279,9606.ENSP00000233893,9606.ENSP00000236671,9606.ENSP00000239940,9606.ENSP00000242208,9606.ENSP00000244534,9606.ENSP00000244573,9606.ENSP00000244745,9606.ENSP00000247191,9606.ENSP00000256442,9606.ENSP00000257934,9606.ENSP00000261692,…	CDC6,MIF,RASD2,AURKA,MYBL2,SALL4,COL1A1,CD38,HSPE1,CTSD,PFN2,INHBA,HIST1H1D,HIST1H1A,SOX4,DLGAP5,CCNB1,ESPL1,CDK2AP1,CCNE1,E2F3,EPCAM,CD80,UBE2S,ICAM1,CENPE,PITX1,TFEC,GAL,DBF4,ARNTL2,CCNA2,CCT5,OTX1,ATAD2,EN1,CCT3,H2AFZ,HMGB2,PLK1,TPX2,CLEC7A,LRP8,CXCL10,HIST1H1E,FANCI,CKS1B,CLSPN,AURKB,EZH2,DSCC1,SOX11,E2F7,PMAIP1,CDCA2,HIST1H1B,CD86,CDCA4,PLAUR,HIST1H1C,FOXM1,E2F1,FN1,BLM,UBE2C,CCL20,DNMT1,STA…
GO:0072711	Cellular response to hydroxyurea	4	13	1.05	0.0365	9606.ENSP00000347232,9606.ENSP00000372088,9606.ENSP00000440402,9606.ENSP00000450607	BLM,RAD51,DDX11,TIMELESS
GO:0032506	Cytokinetic process	6	37	0.77	0.0374	9606.ENSP00000260363,9606.ENSP00000265748,9606.ENSP00000313950,9606.ENSP00000360540,9606.ENSP00000378356,9606.ENSP00000404190	KIF23,ANLN,AURKB,CEP55,KIF20A,RACGAP1
GO:0007568	Aging	18	274	0.38	0.0378	9606.ENSP00000215754,9606.ENSP00000222271,9606.ENSP00000250092,9606.ENSP00000260227,9606.ENSP00000264832,9606.ENSP00000267953,9606.ENSP00000301653,9606.ENSP00000313950,9606.ENSP00000315644,9606.ENSP00000320866,9606.ENSP00000358997,9606.ENSP00000361043,9606.ENSP00000363081,9606.ENSP00000372295,9606.ENSP00000378699,9606.ENSP00000399888,9606.ENSP00000418915,9606.ENSP00000434024	MIF,COMP,CD68,MMP7,ICAM1,BCL2A1,KRT16,AURKB,TYMS,CALR,IRAK1,RAD54L,DKK1,GJB2,CDK1,HMGA1,CDKN2A,H2AFX
GO:0030335	Positive regulation of cell migration	28	522	0.29	0.0379	9606.ENSP00000216117,9606.ENSP00000219150,9606.ENSP00000225655,9606.ENSP00000225964,9606.ENSP00000250160,9606.ENSP00000264832,9606.ENSP00000271638,9606.ENSP00000274793,9606.ENSP00000284240,9606.ENSP00000286758,9606.ENSP00000302569,9606.ENSP00000305651,9606.ENSP00000306512,9606.ENSP00000320866,9606.ENSP00000346839,9606.ENSP00000351671,9606.ENSP00000357712,9606.ENSP00000361405,9606.ENSP00000361668,…	HMOX1,CORO1A,PFN1,COL1A1,WISP1,ICAM1,S100A11,PLA2G7,THY1,CXCL13,CLEC7A,CXCL10,CXCL8,CALR,FN1,CCL20,S100A7,MMP9,EDN2,PLAU,POSTN,FAM83H,CXCR4,TSTA3,LRRC15,ADAM8,ITGAX,ENSG00000158164
GO:0000915	Actomyosin contractile ring assembly	3	5	1.34	0.038	9606.ENSP00000260363,9606.ENSP00000265748,9606.ENSP00000404190	KIF23,ANLN,RACGAP1
GO:0016321	Female meiosis chromosome segregation	3	5	1.34	0.038	9606.ENSP00000240423,9606.ENSP00000300093,9606.ENSP00000358813	NCAPH,PLK1,TTK
GO:0031536	Positive regulation of exit from mitosis	3	5	1.34	0.038	9606.ENSP00000275517,9606.ENSP00000301633,9606.ENSP00000348838	CDCA5,BIRC5,UBE2C
GO:1902750	Negative regulation of cell cycle g2/m phase transition	10	104	0.54	0.0385	9606.ENSP00000209728,9606.ENSP00000216911,9606.ENSP00000297338,9606.ENSP00000300093,9606.ENSP00000312995,9606.ENSP00000313950,9606.ENSP00000347232,9606.ENSP00000355958,9606.ENSP00000360623,9606.ENSP00000378699	CDC6,AURKA,RAD21,PLK1,CLSPN,AURKB,BLM,DTL,ORC1,CDK1
GO:1903901	Negative regulation of viral life cycle	9	86	0.58	0.0392	9606.ENSP00000228928,9606.ENSP00000257570,9606.ENSP00000306565,9606.ENSP00000327459,9606.ENSP00000342278,9606.ENSP00000362931,9606.ENSP00000368699,9606.ENSP00000371471,9606.ENSP00000432218	OAS3,OASL,ISG20,APOBEC3B,OAS2,SRPK1,ISG15,RSAD2,IL32
GO:0048525	Negative regulation of viral process	10	105	0.54	0.0408	9606.ENSP00000228928,9606.ENSP00000257570,9606.ENSP00000306565,9606.ENSP00000327459,9606.ENSP00000342278,9606.ENSP00000354394,9606.ENSP00000362931,9606.ENSP00000368699,9606.ENSP00000371471,9606.ENSP00000432218	OAS3,OASL,ISG20,APOBEC3B,OAS2,STAT1,SRPK1,ISG15,RSAD2,IL32
GO:0045785	Positive regulation of cell adhesion	24	423	0.31	0.041	9606.ENSP00000219150,9606.ENSP00000226284,9606.ENSP00000244745,9606.ENSP00000257527,9606.ENSP00000264246,9606.ENSP00000264832,9606.ENSP00000284240,9606.ENSP00000286758,9606.ENSP00000303939,9606.ENSP00000304283,9606.ENSP00000320866,9606.ENSP00000327801,9606.ENSP00000332049,9606.ENSP00000339328,9606.ENSP00000346839,9606.ENSP00000354532,9606.ENSP00000358997,9606.ENSP00000362201,9606.ENSP00000375616,…	CORO1A,IBSP,SOX4,ADAM19,CD80,ICAM1,THY1,CXCL13,CTLA4,RAC3,CALR,P4HB,CD86,PLAUR,FN1,PNP,IRAK1,SPOCK2,LILRB4,RUNX3,KIF26B,TSTA3,MYO10,ADAM8
GO:0051294	Establishment of spindle orientation	6	38	0.76	0.041	9606.ENSP00000261597,9606.ENSP00000296509,9606.ENSP00000300093,9606.ENSP00000336868,9606.ENSP00000376333,9606.ENSP00000386348	NDC80,MAD2L1,PLK1,CENPA,LLGL2,SAPCD2
GO:0007131	Reciprocal meiotic recombination	7	53	0.68	0.0413	9606.ENSP00000166345,9606.ENSP00000240488,9606.ENSP00000259008,9606.ENSP00000297338,9606.ENSP00000361043,9606.ENSP00000372088,9606.ENSP00000411532	TRIP13,MND1,BRIP1,RAD21,RAD54L,RAD51,TOP2A
GO:0030865	Cortical cytoskeleton organization	7	53	0.68	0.0413	9606.ENSP00000260363,9606.ENSP00000265748,9606.ENSP00000304283,9606.ENSP00000320866,9606.ENSP00000376306,9606.ENSP00000376333,9606.ENSP00000404190	KIF23,ANLN,RAC3,CALR,CIT,LLGL2,RACGAP1
GO:0044249	Cellular biosynthetic process	98	2611	0.13	0.0414	9606.ENSP00000166345,9606.ENSP00000209728,9606.ENSP00000215754,9606.ENSP00000216122,9606.ENSP00000221486,9606.ENSP00000229270,9606.ENSP00000242208,9606.ENSP00000248958,9606.ENSP00000256442,9606.ENSP00000256722,9606.ENSP00000258729,9606.ENSP00000259008,9606.ENSP00000260102,9606.ENSP00000261692,9606.ENSP00000262105,9606.ENSP00000262643,9606.ENSP00000262904,9606.ENSP00000264156,9606.ENSP00000264233,…	TRIP13,CDC6,MIF,MCM5,RNASEH2A,TPI1,INHBA,SDF2L1,CCNB1,CMPK2,IGF2BP3,BRIP1,MRPL15,CDK2AP1,MCM4,CCNE1,E2F3,MCM6,POLQ,MCM2,DBF4,SNRPG,FADS2,RPL39L,KIAA0101,CDT1,CHAF1A,TK1,FEN1,MRPL13,RMI2,CLSPN,TYMS,GEN1,PKM,DSCC1,BGN,PIF1,LIN9,IDH2,SHMT2,NME1,EIF4EBP1,ETV7,E2F1,HIST1H4J,BLM,RRM2,WDHD1,PNP,ILF2,E2F2,EXO1,PARP1,EPRS,CENPF,DTL,ORC1,MRPL14,EDN2,CTPS1,PSAT1,SLC25A39,HIST1H4H,HIST1H4C,ACOT7,PCNA,ISG15,G…
GO:0002685	Regulation of leukocyte migration	15	209	0.42	0.0416	9606.ENSP00000215754,9606.ENSP00000216117,9606.ENSP00000264832,9606.ENSP00000274793,9606.ENSP00000284240,9606.ENSP00000286758,9606.ENSP00000289707,9606.ENSP00000305651,9606.ENSP00000306512,9606.ENSP00000320866,9606.ENSP00000351671,9606.ENSP00000357712,9606.ENSP00000361668,9606.ENSP00000453302,9606.ENSP00000478319	MIF,HMOX1,ICAM1,PLA2G7,THY1,CXCL13,SLAMF8,CXCL10,CXCL8,CALR,CCL20,S100A7,EDN2,ADAM8,GREM1
GO:0070664	Negative regulation of leukocyte proliferation	9	87	0.57	0.0416	9606.ENSP00000262629,9606.ENSP00000264246,9606.ENSP00000265643,9606.ENSP00000303939,9606.ENSP00000322568,9606.ENSP00000332049,9606.ENSP00000418915,9606.ENSP00000430950,9606.ENSP00000478319	TYROBP,CD80,GAL,CTLA4,SOX11,CD86,CDKN2A,IDO1,GREM1
GO:2000573	Positive regulation of dna biosynthetic process	8	70	0.62	0.0432	9606.ENSP00000280326,9606.ENSP00000295688,9606.ENSP00000313950,9606.ENSP00000322180,9606.ENSP00000355966,9606.ENSP00000368458,9606.ENSP00000376272,9606.ENSP00000478319	CCT5,CCT3,AURKB,DSCC1,NEK2,PCNA,RFC4,GREM1
GO:0060707	Trophoblast giant cell differentiation	4	14	1.02	0.0436	9606.ENSP00000230321,9606.ENSP00000270861,9606.ENSP00000323246,9606.ENSP00000481103	MDFI,PLK4,E2F7,E2F8
GO:1904668	Positive regulation of ubiquitin protein ligase activity	4	14	1.02	0.0436	9606.ENSP00000264552,9606.ENSP00000300093,9606.ENSP00000348838,9606.ENSP00000361540	UBE2S,PLK1,UBE2C,CDC20
GO:0051053	Negative regulation of dna metabolic process	11	126	0.5	0.044	9606.ENSP00000244534,9606.ENSP00000244573,9606.ENSP00000264233,9606.ENSP00000307705,9606.ENSP00000310356,9606.ENSP00000328174,9606.ENSP00000330074,9606.ENSP00000339566,9606.ENSP00000347232,9606.ENSP00000355759,9606.ENSP00000381378	HIST1H1D,HIST1H1A,POLQ,HIST1H1E,RMI2,PIF1,HIST1H1B,HIST1H1C,BLM,PARP1,FANCB
GO:0030866	Cortical actin cytoskeleton organization	6	39	0.75	0.0451	9606.ENSP00000260363,9606.ENSP00000265748,9606.ENSP00000320866,9606.ENSP00000376306,9606.ENSP00000376333,9606.ENSP00000404190	KIF23,ANLN,CALR,CIT,LLGL2,RACGAP1
GO:0090224	Regulation of spindle organization	6	39	0.75	0.0451	9606.ENSP00000300093,9606.ENSP00000300403,9606.ENSP00000323300,9606.ENSP00000326550,9606.ENSP00000358925,9606.ENSP00000362937	PLK1,TPX2,SPAG5,TACC3,PSRC1,RCC1
GO:0032268	Regulation of cellular protein metabolic process	100	2693	0.13	0.0499	9606.ENSP00000209728,9606.ENSP00000215754,9606.ENSP00000216127,9606.ENSP00000216341,9606.ENSP00000216911,9606.ENSP00000218230,9606.ENSP00000229239,9606.ENSP00000233893,9606.ENSP00000236671,9606.ENSP00000239940,9606.ENSP00000242208,9606.ENSP00000244745,9606.ENSP00000247191,9606.ENSP00000256442,9606.ENSP00000257934,9606.ENSP00000258729,9606.ENSP00000261692,9606.ENSP00000262300,9606.ENSP00000262643,…	CDC6,MIF,RASD2,GZMB,AURKA,PCSK1N,GAPDH,HSPE1,CTSD,PFN2,INHBA,SOX4,DLGAP5,CCNB1,ESPL1,IGF2BP3,CDK2AP1,PKMYT1,CCNE1,PRDX1,CD80,UBE2S,ICAM1,CENPE,DBF4,CCNA2,THY1,UCHL1,SAMSN1,CCNB2,CSTB,MAD2L1,A2ML1,PLK1,TPX2,BIRC5,CLEC7A,LRP8,CDC25A,CXCL10,CST1,MRPL13,PPP1R14B,FANCI,CKS1B,CLSPN,TYMS,EZH2,CALR,CDC25C,PMAIP1,CDCA2,HIST1H1B,CD86,SHMT2,CDKN3,PLAUR,EIF4EBP1,FOXM1,IFI6,FN1,BLM,UBE2C,CCL20,DNMT1,IQGAP3,PP…
