# Supplementary material for: LncRNA-Based Classification of Triple Negative Breast Cancer Revealed Inherent Tumor Heterogeneity and Vulnerabilities
Source: Noncoding RNA. 2022 Jun 21;8(4):44. doi: 10.3390/ncrna8040044 (PMC9326727; doi:10.3390/ncrna8040044)
Supplement: Supplementary file 1 [file ncrna-08-00044-s001.zip › Supplementary table S6.xlsx]

## Sheet: enrichment.Process (2)
Supplemetary table S6. Enriched gene ontology (GO) terms in LINC00393-Enr TNBC cluster based on STRING analysis
#term ID	term description	observed gene count	background gene count	strength	false discovery rate	matching proteins in your network (IDs)	matching proteins in your network (labels)
GO:0000278	Mitotic cell cycle	113	695	0.81	1.34e-49	9606.ENSP00000160827,9606.ENSP00000166345,9606.ENSP00000209728,9606.ENSP00000216122,9606.ENSP00000216911,9606.ENSP00000217026,9606.ENSP00000219097,9606.ENSP00000240423,9606.ENSP00000242208,9606.ENSP00000244745,9606.ENSP00000247191,9606.ENSP00000251496,9606.ENSP00000256442,9606.ENSP00000257934,9606.ENSP00000260363,9606.ENSP00000260731,9606.ENSP00000261597,9606.ENSP00000262105,9606.ENSP00000262300,…	KIF22,TRIP13,CDC6,MCM5,AURKA,MYBL2,ORC6,NCAPH,INHBA,SOX4,DLGAP5,NCAPG,CCNB1,ESPL1,KIF23,KIF11,NDC80,MCM4,PKMYT1,CCNE1,KIF18A,SGOL1,UBE2S,MCM2,CENPE,DBF4,ANLN,PLK4,NUF2,CCNA2,CDCA5,BUB1B,CCNB2,POC1A,MAD2L1,CHMP4C,MELK,PLK1,TPX2,CDT1,TUBA1C,BIRC5,BUB1,CDC25A,MCM7,CKS1B,CLSPN,AURKB,TYMS,SKA3,CDC25C,DSCC1,E2F7,SPAG5,KIF15,NCAPD2,TACC3,CDKN3,CENPA,EIF4EBP1,FOXM1,E2F1,BLM,RBM38,UBE2C,SMC4,RRM2,WDHD1,IQ…
GO:0007049	Cell cycle	146	1313	0.65	9.81e-48	9606.ENSP00000160827,9606.ENSP00000166345,9606.ENSP00000209728,9606.ENSP00000216122,9606.ENSP00000216911,9606.ENSP00000217026,9606.ENSP00000219097,9606.ENSP00000240423,9606.ENSP00000240488,9606.ENSP00000242208,9606.ENSP00000244745,9606.ENSP00000247191,9606.ENSP00000251496,9606.ENSP00000256442,9606.ENSP00000257934,9606.ENSP00000259008,9606.ENSP00000260363,9606.ENSP00000260731,9606.ENSP00000261597,…	KIF22,TRIP13,CDC6,MCM5,AURKA,MYBL2,ORC6,NCAPH,MND1,INHBA,SOX4,DLGAP5,NCAPG,CCNB1,ESPL1,BRIP1,KIF23,KIF11,NDC80,MCM4,PKMYT1,CCNE1,KIF18A,SGOL1,UBE2S,MCM2,CENPE,DBF4,ANLN,PLK4,NUF2,CCNA2,CDCA5,BUB1B,CCNB2,POC1A,MAD2L1,CHMP4C,RAD21,MELK,KIAA0101,PLK1,TPX2,CDT1,TUBA1C,BIRC5,BUB1,MTBP,CDC25A,FEN1,CXCL8,MCM7,FANCI,CKS1B,KLK10,CLSPN,AURKB,TYMS,SKA3,EZH2,CDC25C,DSCC1,E2F7,SPAG5,KIF15,NCAPD2,TACC3,CDCA2,L…
GO:0022402	Cell cycle process	127	976	0.71	2.26e-47	9606.ENSP00000160827,9606.ENSP00000166345,9606.ENSP00000209728,9606.ENSP00000216122,9606.ENSP00000216911,9606.ENSP00000217026,9606.ENSP00000219097,9606.ENSP00000240423,9606.ENSP00000240488,9606.ENSP00000242208,9606.ENSP00000244745,9606.ENSP00000247191,9606.ENSP00000251496,9606.ENSP00000256442,9606.ENSP00000257934,9606.ENSP00000259008,9606.ENSP00000260363,9606.ENSP00000260731,9606.ENSP00000261597,…	KIF22,TRIP13,CDC6,MCM5,AURKA,MYBL2,ORC6,NCAPH,MND1,INHBA,SOX4,DLGAP5,NCAPG,CCNB1,ESPL1,BRIP1,KIF23,KIF11,NDC80,MCM4,PKMYT1,CCNE1,KIF18A,SGOL1,UBE2S,MCM2,CENPE,DBF4,ANLN,PLK4,NUF2,CCNA2,CDCA5,BUB1B,CCNB2,POC1A,MAD2L1,CHMP4C,RAD21,MELK,KIAA0101,PLK1,TPX2,CDT1,BIRC5,BUB1,MTBP,CDC25A,FEN1,CXCL8,MCM7,CKS1B,CLSPN,AURKB,TYMS,EZH2,CDC25C,DSCC1,E2F7,SPAG5,NCAPD2,TACC3,CDKN3,CASC5,CENPA,EIF4EBP1,FOXM1,E2F1…
GO:1903047	Mitotic cell cycle process	104	616	0.83	4.52e-47	9606.ENSP00000160827,9606.ENSP00000166345,9606.ENSP00000209728,9606.ENSP00000216122,9606.ENSP00000216911,9606.ENSP00000217026,9606.ENSP00000219097,9606.ENSP00000240423,9606.ENSP00000242208,9606.ENSP00000244745,9606.ENSP00000247191,9606.ENSP00000251496,9606.ENSP00000256442,9606.ENSP00000257934,9606.ENSP00000260363,9606.ENSP00000260731,9606.ENSP00000261597,9606.ENSP00000262105,9606.ENSP00000262300,…	KIF22,TRIP13,CDC6,MCM5,AURKA,MYBL2,ORC6,NCAPH,INHBA,SOX4,DLGAP5,NCAPG,CCNB1,ESPL1,KIF23,KIF11,NDC80,MCM4,PKMYT1,CCNE1,KIF18A,SGOL1,UBE2S,MCM2,CENPE,DBF4,ANLN,PLK4,NUF2,CCNA2,CDCA5,BUB1B,CCNB2,POC1A,MAD2L1,CHMP4C,MELK,PLK1,TPX2,CDT1,BIRC5,BUB1,CDC25A,MCM7,CKS1B,CLSPN,AURKB,TYMS,CDC25C,DSCC1,E2F7,SPAG5,NCAPD2,TACC3,CDKN3,CENPA,EIF4EBP1,FOXM1,E2F1,BLM,RBM38,UBE2C,SMC4,RRM2,IQGAP3,CENPF,NEK2,KIF14,TT…
GO:0051276	Chromosome organization	116	1066	0.64	7.38e-36	9606.ENSP00000160827,9606.ENSP00000166345,9606.ENSP00000216122,9606.ENSP00000216911,9606.ENSP00000240423,9606.ENSP00000244534,9606.ENSP00000244573,9606.ENSP00000247191,9606.ENSP00000251496,9606.ENSP00000256442,9606.ENSP00000257934,9606.ENSP00000259008,9606.ENSP00000260363,9606.ENSP00000261597,9606.ENSP00000262105,9606.ENSP00000262643,9606.ENSP00000263181,9606.ENSP00000263382,9606.ENSP00000263753,…	KIF22,TRIP13,MCM5,AURKA,NCAPH,HIST1H1D,HIST1H1A,DLGAP5,NCAPG,CCNB1,ESPL1,BRIP1,KIF23,NDC80,MCM4,CCNE1,KIF18A,ASF1B,SGOL1,POLQ,MCM2,CENPE,NUF2,CCNA2,CDCA5,CENPU,ATAD2,BUB1B,HIST1H2BD,H2AFZ,HMGB2,MAD2L1,CHMP4C,RAD21,PLK1,CDT1,BUB1,FEN1,MCM7,HIST1H1E,CBX2,RMI2,AURKB,EZH2,HIST1H2BC,DSCC1,SPAG5,NCAPD2,PIF1,HIST1H1B,HIST2H2AB,HIST2H3D,CASC5,CENPA,CDCA4,HIST1H1C,HIST1H2AD,HIST1H4J,BLM,HIST1H2BK,SMC4,SYC…
GO:0051301	Cell division	82	493	0.82	8.41e-36	9606.ENSP00000209728,9606.ENSP00000216911,9606.ENSP00000240423,9606.ENSP00000251496,9606.ENSP00000256442,9606.ENSP00000257934,9606.ENSP00000259008,9606.ENSP00000260363,9606.ENSP00000260731,9606.ENSP00000261597,9606.ENSP00000262643,9606.ENSP00000263753,9606.ENSP00000264552,9606.ENSP00000265148,9606.ENSP00000265748,9606.ENSP00000271452,9606.ENSP00000274026,9606.ENSP00000275517,9606.ENSP00000287598,…	CDC6,AURKA,NCAPH,NCAPG,CCNB1,ESPL1,BRIP1,KIF23,KIF11,NDC80,CCNE1,SGOL1,UBE2S,CENPE,ANLN,NUF2,CCNA2,CDCA5,BUB1B,CCNB2,MAD2L1,CHMP4C,RAD21,PLK1,TPX2,CDT1,TUBA1C,BIRC5,BUB1,CDC25A,CKS1B,AURKB,SKA3,CDC25C,SPAG5,NCAPD2,TACC3,CDCA2,CASC5,CENPA,UBE2C,SMC4,SYCP2,CENPF,NEK2,KIF14,ASPM,CENPW,PSRC1,CEP55,KIF2C,CDC20,CDCA8,RCC1,ZWINT,KIF4A,CKS2,CKAP2,CIT,PTTG1,HELLS,PRC1,INCENP,KIF20A,CDK1,SEPT3,GPSM2,SAPCD2…
GO:0000280	Nuclear division	66	291	0.96	2.73e-35	9606.ENSP00000160827,9606.ENSP00000166345,9606.ENSP00000216911,9606.ENSP00000217026,9606.ENSP00000240423,9606.ENSP00000240488,9606.ENSP00000247191,9606.ENSP00000251496,9606.ENSP00000256442,9606.ENSP00000257934,9606.ENSP00000259008,9606.ENSP00000260363,9606.ENSP00000260731,9606.ENSP00000261597,9606.ENSP00000262643,9606.ENSP00000263181,9606.ENSP00000263753,9606.ENSP00000264552,9606.ENSP00000265148,…	KIF22,TRIP13,AURKA,MYBL2,NCAPH,MND1,DLGAP5,NCAPG,CCNB1,ESPL1,BRIP1,KIF23,KIF11,NDC80,CCNE1,KIF18A,SGOL1,UBE2S,CENPE,NUF2,CDCA5,BUB1B,CCNB2,MAD2L1,CHMP4C,RAD21,PLK1,TPX2,CDT1,BIRC5,BUB1,AURKB,DSCC1,SPAG5,NCAPD2,UBE2C,SMC4,SYCP2,HORMAD1,NEK2,KIF14,ASPM,TDRKH,TTK,PSRC1,RAD54L,KIF2C,CDC20,CDCA8,ZWINT,KIF4A,CKS2,RAD51,FANCA,PTTG1,PRC1,INCENP,CDK1,NCAPG2,KIFC1,RACGAP1,TOP2A,CCNE2,MYBL1,NUSAP1,KIF18B
GO:0048285	Organelle fission	68	318	0.93	4.04e-35	9606.ENSP00000160827,9606.ENSP00000166345,9606.ENSP00000216911,9606.ENSP00000217026,9606.ENSP00000240423,9606.ENSP00000240488,9606.ENSP00000247191,9606.ENSP00000251496,9606.ENSP00000256442,9606.ENSP00000257934,9606.ENSP00000259008,9606.ENSP00000260363,9606.ENSP00000260731,9606.ENSP00000261597,9606.ENSP00000262643,9606.ENSP00000263181,9606.ENSP00000263753,9606.ENSP00000264552,9606.ENSP00000265148,…	KIF22,TRIP13,AURKA,MYBL2,NCAPH,MND1,DLGAP5,NCAPG,CCNB1,ESPL1,BRIP1,KIF23,KIF11,NDC80,CCNE1,KIF18A,SGOL1,UBE2S,CENPE,MTFP1,NUF2,CDCA5,BUB1B,CCNB2,MAD2L1,CHMP4C,RAD21,PLK1,TPX2,CDT1,BIRC5,BUB1,AURKB,DSCC1,SPAG5,NCAPD2,UBE2C,SMC4,SYCP2,HORMAD1,NEK2,KIF14,ASPM,TDRKH,TTK,PSRC1,RAD54L,KIF2C,CDC20,CDCA8,ZWINT,KIF4A,CKS2,RAD51,FANCA,PTTG1,PRC1,INCENP,CDK1,NCAPG2,KIFC1,MTFR2,RACGAP1,TOP2A,CCNE2,MYBL1,NUSA…
GO:0007059	Chromosome segregation	60	268	0.95	1.25e-31	9606.ENSP00000160827,9606.ENSP00000166345,9606.ENSP00000240423,9606.ENSP00000247191,9606.ENSP00000251496,9606.ENSP00000256442,9606.ENSP00000257934,9606.ENSP00000259008,9606.ENSP00000260363,9606.ENSP00000261597,9606.ENSP00000262643,9606.ENSP00000263181,9606.ENSP00000263753,9606.ENSP00000265148,9606.ENSP00000271452,9606.ENSP00000275517,9606.ENSP00000287598,9606.ENSP00000296509,9606.ENSP00000297265,…	KIF22,TRIP13,NCAPH,DLGAP5,NCAPG,CCNB1,ESPL1,BRIP1,KIF23,NDC80,CCNE1,KIF18A,SGOL1,CENPE,NUF2,CDCA5,BUB1B,MAD2L1,CHMP4C,RAD21,PLK1,CDT1,BIRC5,BUB1,AURKB,SKA3,DSCC1,SPAG5,NCAPD2,CDCA2,CASC5,SMC4,SYCP2,HORMAD1,CENPF,NEK2,KIF14,CENPW,TTK,PSRC1,KIF2C,CDC20,CDCA8,SRPK1,RCC1,ZWINT,KIF4A,CENPN,PTTG1,PRC1,INCENP,NCAPG2,KIFC1,RACGAP1,TOP2A,HJURP,CCNE2,NUSAP1,KIF18B,FAM83D
GO:0098813	Nuclear chromosome segregation	52	209	1	5.3e-29	9606.ENSP00000160827,9606.ENSP00000166345,9606.ENSP00000240423,9606.ENSP00000247191,9606.ENSP00000251496,9606.ENSP00000256442,9606.ENSP00000257934,9606.ENSP00000259008,9606.ENSP00000260363,9606.ENSP00000261597,9606.ENSP00000262643,9606.ENSP00000263181,9606.ENSP00000263753,9606.ENSP00000265148,9606.ENSP00000271452,9606.ENSP00000275517,9606.ENSP00000287598,9606.ENSP00000296509,9606.ENSP00000297265,…	KIF22,TRIP13,NCAPH,DLGAP5,NCAPG,CCNB1,ESPL1,BRIP1,KIF23,NDC80,CCNE1,KIF18A,SGOL1,CENPE,NUF2,CDCA5,BUB1B,MAD2L1,CHMP4C,RAD21,PLK1,CDT1,BUB1,AURKB,DSCC1,SPAG5,NCAPD2,CASC5,SMC4,SYCP2,HORMAD1,CENPF,NEK2,KIF14,TTK,PSRC1,KIF2C,CDC20,CDCA8,ZWINT,KIF4A,PTTG1,PRC1,INCENP,NCAPG2,KIFC1,RACGAP1,TOP2A,CCNE2,NUSAP1,KIF18B,FAM83D
GO:0071103	DNA conformation change	61	328	0.87	2.37e-28	9606.ENSP00000216122,9606.ENSP00000240423,9606.ENSP00000244534,9606.ENSP00000244573,9606.ENSP00000251496,9606.ENSP00000256442,9606.ENSP00000259008,9606.ENSP00000262105,9606.ENSP00000263382,9606.ENSP00000264233,9606.ENSP00000265056,9606.ENSP00000275517,9606.ENSP00000281453,9606.ENSP00000289316,9606.ENSP00000296503,9606.ENSP00000307288,9606.ENSP00000307705,9606.ENSP00000321744,9606.ENSP00000322180,…	MCM5,NCAPH,HIST1H1D,HIST1H1A,NCAPG,CCNB1,BRIP1,MCM4,ASF1B,POLQ,MCM2,CDCA5,CENPU,HIST1H2BD,HMGB2,MCM7,HIST1H1E,HIST1H2BC,DSCC1,NCAPD2,PIF1,HIST1H1B,HIST2H3D,CASC5,CENPA,HIST1H1C,HIST1H4J,BLM,HIST1H2BK,SMC4,HIST1H3J,CENPW,HIST2H2BE,HIST2H3C,HMGB3,RAD54L,SRPK1,HIST1H2BL,HIST1H4H,HIST1H3D,HIST1H4C,RAD51,RFC4,CENPN,HELLS,INCENP,CDK1,HIST2H3A,NCAPG2,HMGA1,TOP2A,HJURP,CDKN2A,H2AFX,HIST2H2BF,NUSAP1,HIST1…
GO:0140014	Mitotic nuclear division	46	156	1.07	3.64e-28	9606.ENSP00000160827,9606.ENSP00000216911,9606.ENSP00000217026,9606.ENSP00000240423,9606.ENSP00000247191,9606.ENSP00000251496,9606.ENSP00000256442,9606.ENSP00000257934,9606.ENSP00000260363,9606.ENSP00000260731,9606.ENSP00000261597,9606.ENSP00000263181,9606.ENSP00000263753,9606.ENSP00000264552,9606.ENSP00000265148,9606.ENSP00000271452,9606.ENSP00000275517,9606.ENSP00000288207,9606.ENSP00000296509,…	KIF22,AURKA,MYBL2,NCAPH,DLGAP5,NCAPG,CCNB1,ESPL1,KIF23,KIF11,NDC80,KIF18A,SGOL1,UBE2S,CENPE,NUF2,CDCA5,CCNB2,MAD2L1,CHMP4C,PLK1,TPX2,CDT1,BIRC5,AURKB,DSCC1,SPAG5,NCAPD2,UBE2C,SMC4,NEK2,KIF14,PSRC1,KIF2C,CDC20,CDCA8,ZWINT,KIF4A,PRC1,INCENP,CDK1,NCAPG2,KIFC1,RACGAP1,NUSAP1,KIF18B
GO:0000819	Sister chromatid segregation	42	133	1.1	1.5e-26	9606.ENSP00000160827,9606.ENSP00000240423,9606.ENSP00000247191,9606.ENSP00000251496,9606.ENSP00000256442,9606.ENSP00000257934,9606.ENSP00000260363,9606.ENSP00000261597,9606.ENSP00000263181,9606.ENSP00000263753,9606.ENSP00000265148,9606.ENSP00000271452,9606.ENSP00000275517,9606.ENSP00000287598,9606.ENSP00000296509,9606.ENSP00000297265,9606.ENSP00000297338,9606.ENSP00000300093,9606.ENSP00000301019,…	KIF22,NCAPH,DLGAP5,NCAPG,CCNB1,ESPL1,KIF23,NDC80,KIF18A,SGOL1,CENPE,NUF2,CDCA5,BUB1B,MAD2L1,CHMP4C,RAD21,PLK1,CDT1,BUB1,AURKB,DSCC1,SPAG5,NCAPD2,SMC4,HORMAD1,NEK2,KIF14,PSRC1,KIF2C,CDC20,CDCA8,ZWINT,KIF4A,PRC1,INCENP,NCAPG2,KIFC1,RACGAP1,TOP2A,NUSAP1,KIF18B
GO:0000070	Mitotic sister chromatid segregation	37	108	1.13	3.31e-24	9606.ENSP00000160827,9606.ENSP00000240423,9606.ENSP00000247191,9606.ENSP00000251496,9606.ENSP00000256442,9606.ENSP00000257934,9606.ENSP00000260363,9606.ENSP00000261597,9606.ENSP00000263181,9606.ENSP00000263753,9606.ENSP00000265148,9606.ENSP00000271452,9606.ENSP00000275517,9606.ENSP00000296509,9606.ENSP00000297265,9606.ENSP00000300093,9606.ENSP00000301019,9606.ENSP00000313950,9606.ENSP00000322180,…	KIF22,NCAPH,DLGAP5,NCAPG,CCNB1,ESPL1,KIF23,NDC80,KIF18A,SGOL1,CENPE,NUF2,CDCA5,MAD2L1,CHMP4C,PLK1,CDT1,AURKB,DSCC1,SPAG5,NCAPD2,SMC4,NEK2,KIF14,PSRC1,KIF2C,CDC20,CDCA8,ZWINT,KIF4A,PRC1,INCENP,NCAPG2,KIFC1,RACGAP1,NUSAP1,KIF18B
GO:0006323	DNA packaging	47	215	0.94	4.95e-24	9606.ENSP00000240423,9606.ENSP00000244534,9606.ENSP00000244573,9606.ENSP00000251496,9606.ENSP00000256442,9606.ENSP00000263382,9606.ENSP00000265056,9606.ENSP00000275517,9606.ENSP00000281453,9606.ENSP00000289316,9606.ENSP00000296503,9606.ENSP00000307705,9606.ENSP00000321744,9606.ENSP00000325017,9606.ENSP00000330074,9606.ENSP00000333277,9606.ENSP00000335463,9606.ENSP00000336868,9606.ENSP00000339566,…	NCAPH,HIST1H1D,HIST1H1A,NCAPG,CCNB1,ASF1B,MCM2,CDCA5,CENPU,HIST1H2BD,HMGB2,HIST1H1E,HIST1H2BC,NCAPD2,HIST1H1B,HIST2H3D,CASC5,CENPA,HIST1H1C,HIST1H4J,HIST1H2BK,SMC4,HIST1H3J,CENPW,HIST2H2BE,HIST2H3C,SRPK1,HIST1H2BL,HIST1H4H,HIST1H3D,HIST1H4C,CENPN,HELLS,INCENP,CDK1,HIST2H3A,NCAPG2,HMGA1,TOP2A,HJURP,CDKN2A,H2AFX,HIST2H2BF,NUSAP1,HIST1H2BJ,HIST3H2BB,HIST1H2BN
GO:0010564	Regulation of cell cycle process	78	760	0.61	1.27e-21	9606.ENSP00000166345,9606.ENSP00000209728,9606.ENSP00000215754,9606.ENSP00000216911,9606.ENSP00000244745,9606.ENSP00000247191,9606.ENSP00000256442,9606.ENSP00000257934,9606.ENSP00000260363,9606.ENSP00000260731,9606.ENSP00000261597,9606.ENSP00000262300,9606.ENSP00000265148,9606.ENSP00000265728,9606.ENSP00000265748,9606.ENSP00000270861,9606.ENSP00000275517,9606.ENSP00000287598,9606.ENSP00000296484,…	TRIP13,CDC6,MIF,AURKA,SOX4,DLGAP5,CCNB1,ESPL1,KIF23,KIF11,NDC80,PKMYT1,CENPE,DBF4,ANLN,PLK4,CDCA5,BUB1B,POC1A,MAD2L1,CHMP4C,RAD21,PLK1,TPX2,CDT1,BIRC5,BUB1,MTBP,CDC25A,FEN1,RMI2,CLSPN,AURKB,GEN1,EZH2,CALR,CDC25C,E2F7,SPAG5,TACC3,MAPK15,FOXM1,E2F1,BLM,RBM38,UBE2C,RRM2,HORMAD1,CENPF,DTL,NEK2,KIF14,MKI67,TTK,PSRC1,STIL,CDC20,RCC1,UBD,PCNA,RAD51,CIT,GIPC1,HMMR,PTTG1,PRC1,INCENP,KIF20A,CDK1,GPSM2,CDC7…
GO:0051726	Regulation of cell cycle	100	1230	0.51	2.17e-21	9606.ENSP00000166345,9606.ENSP00000209728,9606.ENSP00000215754,9606.ENSP00000216911,9606.ENSP00000217026,9606.ENSP00000242208,9606.ENSP00000244745,9606.ENSP00000247191,9606.ENSP00000256442,9606.ENSP00000257934,9606.ENSP00000259008,9606.ENSP00000260363,9606.ENSP00000260731,9606.ENSP00000261597,9606.ENSP00000262300,9606.ENSP00000262643,9606.ENSP00000265148,9606.ENSP00000265728,9606.ENSP00000265748,…	TRIP13,CDC6,MIF,AURKA,MYBL2,INHBA,SOX4,DLGAP5,CCNB1,ESPL1,BRIP1,KIF23,KIF11,NDC80,PKMYT1,CCNE1,CENPE,DBF4,ANLN,PLK4,CCNA2,CDCA5,BUB1B,CCNB2,POC1A,MAD2L1,CHMP4C,RAD21,KIAA0101,PLK1,TPX2,CDT1,BIRC5,BUB1,MTBP,CDC25A,FEN1,CXCL8,RMI2,CKS1B,CLSPN,AURKB,GEN1,EZH2,CALR,CDC25C,SOX11,E2F7,SPAG5,TACC3,LIN9,CDKN3,MAPK15,EIF4EBP1,FOXM1,E2F1,BLM,RBM38,UBE2C,RRM2,HORMAD1,E2F2,CENPF,DTL,NEK2,KIF14,ASPM,MKI67,TTK…
GO:0065004	protein-DNA complex assembly	42	213	0.89	7.99e-20	9606.ENSP00000216122,9606.ENSP00000244534,9606.ENSP00000244573,9606.ENSP00000262105,9606.ENSP00000263382,9606.ENSP00000265056,9606.ENSP00000265148,9606.ENSP00000281453,9606.ENSP00000289316,9606.ENSP00000296503,9606.ENSP00000301019,9606.ENSP00000307288,9606.ENSP00000307705,9606.ENSP00000321744,9606.ENSP00000330074,9606.ENSP00000333277,9606.ENSP00000335463,9606.ENSP00000336868,9606.ENSP00000339566,…	MCM5,HIST1H1D,HIST1H1A,MCM4,ASF1B,MCM2,CENPE,CENPU,HIST1H2BD,HMGB2,CDT1,MCM7,HIST1H1E,HIST1H2BC,HIST1H1B,HIST2H3D,CASC5,CENPA,HIST1H1C,HIST1H4J,HIST1H2BK,HIST1H3J,CENPF,CENPW,HIST2H2BE,HIST2H3C,HIST1H2BL,HIST1H4H,HIST1H3D,HIST1H4C,RAD51,CENPN,HELLS,HIST2H3A,CDC45,HJURP,H2AFX,HIST2H2BF,HIST1H2BJ,HIST3H2BB,MCM3,HIST1H2BN
GO:0071824	protein-DNA complex subunit organization	45	255	0.85	1.11e-19	9606.ENSP00000216122,9606.ENSP00000244534,9606.ENSP00000244573,9606.ENSP00000262105,9606.ENSP00000263382,9606.ENSP00000265056,9606.ENSP00000265148,9606.ENSP00000281453,9606.ENSP00000289316,9606.ENSP00000296503,9606.ENSP00000301019,9606.ENSP00000307288,9606.ENSP00000307705,9606.ENSP00000321744,9606.ENSP00000330074,9606.ENSP00000333277,9606.ENSP00000335463,9606.ENSP00000336868,9606.ENSP00000339566,…	MCM5,HIST1H1D,HIST1H1A,MCM4,ASF1B,MCM2,CENPE,CENPU,HIST1H2BD,HMGB2,CDT1,MCM7,HIST1H1E,HIST1H2BC,HIST1H1B,HIST2H3D,CASC5,CENPA,HIST1H1C,HIST1H4J,HIST1H2BK,HIST1H3J,HIST3H2A,CENPF,CENPW,HIST2H2BE,HIST2H3C,HIST1H2BL,HIST1H4H,HIST1H3D,HIST1H4C,RAD51,CENPN,HELLS,HIST2H3A,HMGA1,CDC45,HJURP,H2AFX,HIST2H2BF,ANP32E,HIST1H2BJ,HIST3H2BB,MCM3,HIST1H2BN
GO:0051983	Regulation of chromosome segregation	32	104	1.09	1.22e-19	9606.ENSP00000166345,9606.ENSP00000209728,9606.ENSP00000247191,9606.ENSP00000256442,9606.ENSP00000257934,9606.ENSP00000261597,9606.ENSP00000265148,9606.ENSP00000275517,9606.ENSP00000287598,9606.ENSP00000296509,9606.ENSP00000297338,9606.ENSP00000300093,9606.ENSP00000301019,9606.ENSP00000301633,9606.ENSP00000302530,9606.ENSP00000305480,9606.ENSP00000310356,9606.ENSP00000313950,9606.ENSP00000318977,…	TRIP13,CDC6,DLGAP5,CCNB1,ESPL1,NDC80,CENPE,CDCA5,BUB1B,MAD2L1,RAD21,PLK1,CDT1,BIRC5,BUB1,FEN1,RMI2,AURKB,GEN1,SPAG5,TACC3,MAPK15,UBE2C,HORMAD1,CENPF,NEK2,MKI67,TTK,KIF2C,CDC20,PTTG1,RACGAP1
GO:0006996	Organelle organization	179	3450	0.31	1.37e-19	9606.ENSP00000160827,9606.ENSP00000166345,9606.ENSP00000184183,9606.ENSP00000216122,9606.ENSP00000216911,9606.ENSP00000217026,9606.ENSP00000229239,9606.ENSP00000240423,9606.ENSP00000240488,9606.ENSP00000244534,9606.ENSP00000244573,9606.ENSP00000247191,9606.ENSP00000251496,9606.ENSP00000252252,9606.ENSP00000256442,9606.ENSP00000257934,9606.ENSP00000259008,9606.ENSP00000260363,9606.ENSP00000260731,…	KIF22,TRIP13,ROPN1,MCM5,AURKA,MYBL2,GAPDH,NCAPH,MND1,HIST1H1D,HIST1H1A,DLGAP5,NCAPG,KRT6B,CCNB1,ESPL1,BRIP1,KIF23,KIF11,NDC80,MCM4,CCNE1,KIF18A,ASF1B,SGOL1,CAPG,PKP1,POLQ,UBE2S,MCM2,CENPE,ANLN,SQLE,MTFP1,PLK4,NUF2,ATP6V1C2,CCNA2,CDCA5,NDUFB9,CENPU,ATAD2,BUB1B,CCNB2,HIST1H2BD,SLAMF8,H2AFZ,POC1A,HMGB2,MAD2L1,CHMP4C,RAD21,KIAA0101,PLK1,TPX2,CDT1,TUBA1C,BIRC5,KRT16,BUB1,FEN1,MCM7,HIST1H1E,CBX2,RMI2,A…
GO:0051783	Regulation of nuclear division	38	186	0.91	2.64e-18	9606.ENSP00000166345,9606.ENSP00000209728,9606.ENSP00000216911,9606.ENSP00000247191,9606.ENSP00000256442,9606.ENSP00000257934,9606.ENSP00000260731,9606.ENSP00000261597,9606.ENSP00000262300,9606.ENSP00000265148,9606.ENSP00000265748,9606.ENSP00000275517,9606.ENSP00000287598,9606.ENSP00000296509,9606.ENSP00000297265,9606.ENSP00000297338,9606.ENSP00000300093,9606.ENSP00000301019,9606.ENSP00000301633,…	TRIP13,CDC6,AURKA,DLGAP5,CCNB1,ESPL1,KIF11,NDC80,PKMYT1,CENPE,ANLN,CDCA5,BUB1B,MAD2L1,CHMP4C,RAD21,PLK1,CDT1,BIRC5,BUB1,MTBP,AURKB,GEN1,CALR,CDC25C,TACC3,MAPK15,UBE2C,HORMAD1,CENPF,NEK2,MKI67,TTK,CDC20,RCC1,PTTG1,RANBP1,NUSAP1
GO:0016043	Cellular component organization	237	5447	0.24	2.67e-18	9606.ENSP00000160827,9606.ENSP00000166345,9606.ENSP00000184183,9606.ENSP00000215743,9606.ENSP00000215754,9606.ENSP00000216122,9606.ENSP00000216911,9606.ENSP00000217026,9606.ENSP00000222598,9606.ENSP00000229239,9606.ENSP00000234392,9606.ENSP00000240423,9606.ENSP00000240488,9606.ENSP00000244534,9606.ENSP00000244573,9606.ENSP00000247191,9606.ENSP00000251496,9606.ENSP00000252252,9606.ENSP00000256442,…	KIF22,TRIP13,ROPN1,MMP11,MIF,MCM5,AURKA,MYBL2,DLX5,GAPDH,VAX2,NCAPH,MND1,HIST1H1D,HIST1H1A,DLGAP5,NCAPG,KRT6B,CCNB1,ESPL1,BRIP1,MRPL15,MMP13,KIF23,KIF11,NDC80,MCM4,COTL1,CCNE1,KIF18A,ASF1B,SGOL1,CAPG,PKP1,POLQ,UBE2S,MCM2,CENPE,ANLN,SQLE,MTFP1,PLK4,NUF2,ATP6V1C2,CCNA2,CDCA5,NDUFB9,CENPU,ATAD2,BUB1B,CCNB2,HIST1H2BD,SLAMF8,AQP5,CCT3,H2AFZ,POC1A,HMGB2,MAD2L1,CHMP4C,RAD21,KIAA0101,PLK1,TPX2,CDT1,TUBA1…
GO:1902850	Microtubule cytoskeleton organization involved in mitosis	31	112	1.04	6.47e-18	9606.ENSP00000216911,9606.ENSP00000217026,9606.ENSP00000256442,9606.ENSP00000257934,9606.ENSP00000260363,9606.ENSP00000260731,9606.ENSP00000261597,9606.ENSP00000265148,9606.ENSP00000271452,9606.ENSP00000296484,9606.ENSP00000296509,9606.ENSP00000300093,9606.ENSP00000300403,9606.ENSP00000301633,9606.ENSP00000313950,9606.ENSP00000326550,9606.ENSP00000336868,9606.ENSP00000355966,9606.ENSP00000358813,…	AURKA,MYBL2,CCNB1,ESPL1,KIF23,KIF11,NDC80,CENPE,NUF2,POC1A,MAD2L1,PLK1,TPX2,BIRC5,AURKB,TACC3,CENPA,NEK2,TTK,STIL,CDC20,RCC1,KIF4A,PRC1,WDR62,GPSM2,SAPCD2,KIFC1,RACGAP1,STMN1,NUSAP1
GO:0044772	Mitotic cell cycle phase transition	44	280	0.8	1.43e-17	9606.ENSP00000209728,9606.ENSP00000216122,9606.ENSP00000216911,9606.ENSP00000219097,9606.ENSP00000242208,9606.ENSP00000256442,9606.ENSP00000262105,9606.ENSP00000262300,9606.ENSP00000262643,9606.ENSP00000264552,9606.ENSP00000265056,9606.ENSP00000265728,9606.ENSP00000270861,9606.ENSP00000274026,9606.ENSP00000288207,9606.ENSP00000298048,9606.ENSP00000300093,9606.ENSP00000301019,9606.ENSP00000301633,…	CDC6,MCM5,AURKA,ORC6,INHBA,CCNB1,MCM4,PKMYT1,CCNE1,UBE2S,MCM2,DBF4,PLK4,CCNA2,CCNB2,MELK,PLK1,CDT1,BIRC5,CDC25A,MCM7,CKS1B,TYMS,CDC25C,E2F7,TACC3,CDKN3,EIF4EBP1,FOXM1,E2F1,UBE2C,RRM2,IQGAP3,NEK2,RCC1,CKS2,PCNA,CDK1,CDC7,CDC45,MCM10,CDKN2A,CCNE2,MCM3
GO:0007088	Regulation of mitotic nuclear division	35	162	0.93	1.8e-17	9606.ENSP00000166345,9606.ENSP00000209728,9606.ENSP00000216911,9606.ENSP00000247191,9606.ENSP00000256442,9606.ENSP00000257934,9606.ENSP00000260731,9606.ENSP00000261597,9606.ENSP00000262300,9606.ENSP00000265148,9606.ENSP00000265748,9606.ENSP00000275517,9606.ENSP00000287598,9606.ENSP00000296509,9606.ENSP00000297265,9606.ENSP00000297338,9606.ENSP00000300093,9606.ENSP00000301019,9606.ENSP00000301633,…	TRIP13,CDC6,AURKA,DLGAP5,CCNB1,ESPL1,KIF11,NDC80,PKMYT1,CENPE,ANLN,CDCA5,BUB1B,MAD2L1,CHMP4C,RAD21,PLK1,CDT1,BIRC5,BUB1,MTBP,AURKB,GEN1,CDC25C,TACC3,UBE2C,CENPF,NEK2,MKI67,TTK,CDC20,RCC1,PTTG1,RANBP1,NUSAP1
GO:0071840	Cellular component organization or biogenesis	239	5633	0.23	3.84e-17	9606.ENSP00000160827,9606.ENSP00000166345,9606.ENSP00000184183,9606.ENSP00000215743,9606.ENSP00000215754,9606.ENSP00000216122,9606.ENSP00000216911,9606.ENSP00000217026,9606.ENSP00000222598,9606.ENSP00000229239,9606.ENSP00000234392,9606.ENSP00000240423,9606.ENSP00000240488,9606.ENSP00000244534,9606.ENSP00000244573,9606.ENSP00000247191,9606.ENSP00000251496,9606.ENSP00000252252,9606.ENSP00000256442,…	KIF22,TRIP13,ROPN1,MMP11,MIF,MCM5,AURKA,MYBL2,DLX5,GAPDH,VAX2,NCAPH,MND1,HIST1H1D,HIST1H1A,DLGAP5,NCAPG,KRT6B,CCNB1,ESPL1,BRIP1,MRPL15,MMP13,KIF23,KIF11,NDC80,MCM4,COTL1,CCNE1,KIF18A,ASF1B,SGOL1,CAPG,PKP1,POLQ,UBE2S,MCM2,CENPE,ANLN,SQLE,MTFP1,PLK4,NUF2,ATP6V1C2,CCNA2,CDCA5,NDUFB9,CENPU,ATAD2,BUB1B,CCNB2,HIST1H2BD,SLAMF8,AQP5,CCT3,H2AFZ,POC1A,HMGB2,MAD2L1,CHMP4C,RAD21,DCAF13,KIAA0101,PLK1,TPX2,CDT…
GO:0045787	Positive regulation of cell cycle	50	388	0.71	6.04e-17	9606.ENSP00000209728,9606.ENSP00000215754,9606.ENSP00000216911,9606.ENSP00000244745,9606.ENSP00000247191,9606.ENSP00000256442,9606.ENSP00000257934,9606.ENSP00000260363,9606.ENSP00000261597,9606.ENSP00000265728,9606.ENSP00000270861,9606.ENSP00000275517,9606.ENSP00000296484,9606.ENSP00000296509,9606.ENSP00000297338,9606.ENSP00000301019,9606.ENSP00000301633,9606.ENSP00000303398,9606.ENSP00000303706,…	CDC6,MIF,AURKA,SOX4,DLGAP5,CCNB1,ESPL1,KIF23,NDC80,DBF4,PLK4,CDCA5,POC1A,MAD2L1,RAD21,CDT1,BIRC5,MTBP,CDC25A,FEN1,CKS1B,AURKB,GEN1,EZH2,CALR,CDC25C,E2F7,SPAG5,MAPK15,EIF4EBP1,E2F1,RBM38,UBE2C,DTL,KIF14,PSRC1,CKS2,PCNA,CIT,GIPC1,CDK1,GPSM2,CDC7,RANBP1,RACGAP1,CDC45,CDKN2A,NUSAP1,E2F8,FAM83D
GO:0006334	Nucleosome assembly	32	135	0.97	6.36e-17	9606.ENSP00000244534,9606.ENSP00000244573,9606.ENSP00000263382,9606.ENSP00000265056,9606.ENSP00000281453,9606.ENSP00000289316,9606.ENSP00000296503,9606.ENSP00000307705,9606.ENSP00000321744,9606.ENSP00000330074,9606.ENSP00000333277,9606.ENSP00000335463,9606.ENSP00000336868,9606.ENSP00000339566,9606.ENSP00000347168,9606.ENSP00000349430,9606.ENSP00000352252,9606.ENSP00000357308,9606.ENSP00000358151,…	HIST1H1D,HIST1H1A,ASF1B,MCM2,CENPU,HIST1H2BD,HMGB2,HIST1H1E,HIST1H2BC,HIST1H1B,HIST2H3D,CASC5,CENPA,HIST1H1C,HIST1H4J,HIST1H2BK,HIST1H3J,CENPW,HIST2H2BE,HIST2H3C,HIST1H2BL,HIST1H4H,HIST1H3D,HIST1H4C,CENPN,HIST2H3A,HJURP,H2AFX,HIST2H2BF,HIST1H2BJ,HIST3H2BB,HIST1H2BN
GO:0090068	Positive regulation of cell cycle process	44	294	0.77	6.36e-17	9606.ENSP00000209728,9606.ENSP00000216911,9606.ENSP00000244745,9606.ENSP00000247191,9606.ENSP00000256442,9606.ENSP00000257934,9606.ENSP00000260363,9606.ENSP00000261597,9606.ENSP00000265728,9606.ENSP00000270861,9606.ENSP00000275517,9606.ENSP00000296484,9606.ENSP00000296509,9606.ENSP00000297338,9606.ENSP00000301019,9606.ENSP00000301633,9606.ENSP00000303398,9606.ENSP00000303706,9606.ENSP00000305480,…	CDC6,AURKA,SOX4,DLGAP5,CCNB1,ESPL1,KIF23,NDC80,DBF4,PLK4,CDCA5,POC1A,MAD2L1,RAD21,CDT1,BIRC5,MTBP,CDC25A,FEN1,AURKB,GEN1,EZH2,CDC25C,E2F7,SPAG5,MAPK15,E2F1,RBM38,UBE2C,DTL,KIF14,PCNA,CIT,GIPC1,CDK1,GPSM2,CDC7,RANBP1,RACGAP1,CDC45,CDKN2A,NUSAP1,E2F8,FAM83D
GO:0031497	Chromatin assembly	35	172	0.91	7.8e-17	9606.ENSP00000244534,9606.ENSP00000244573,9606.ENSP00000263382,9606.ENSP00000265056,9606.ENSP00000281453,9606.ENSP00000289316,9606.ENSP00000296503,9606.ENSP00000307705,9606.ENSP00000321744,9606.ENSP00000330074,9606.ENSP00000333277,9606.ENSP00000335463,9606.ENSP00000336868,9606.ENSP00000339566,9606.ENSP00000347168,9606.ENSP00000349430,9606.ENSP00000352252,9606.ENSP00000357308,9606.ENSP00000358151,…	HIST1H1D,HIST1H1A,ASF1B,MCM2,CENPU,HIST1H2BD,HMGB2,HIST1H1E,HIST1H2BC,HIST1H1B,HIST2H3D,CASC5,CENPA,HIST1H1C,HIST1H4J,HIST1H2BK,HIST1H3J,CENPW,HIST2H2BE,HIST2H3C,HIST1H2BL,HIST1H4H,HIST1H3D,HIST1H4C,CENPN,HELLS,HIST2H3A,HMGA1,HJURP,CDKN2A,H2AFX,HIST2H2BF,HIST1H2BJ,HIST3H2BB,HIST1H2BN
GO:0034728	Nucleosome organization	35	176	0.9	1.44e-16	9606.ENSP00000244534,9606.ENSP00000244573,9606.ENSP00000263382,9606.ENSP00000265056,9606.ENSP00000281453,9606.ENSP00000289316,9606.ENSP00000296503,9606.ENSP00000307705,9606.ENSP00000321744,9606.ENSP00000330074,9606.ENSP00000333277,9606.ENSP00000335463,9606.ENSP00000336868,9606.ENSP00000339566,9606.ENSP00000347168,9606.ENSP00000349430,9606.ENSP00000352252,9606.ENSP00000355656,9606.ENSP00000357308,…	HIST1H1D,HIST1H1A,ASF1B,MCM2,CENPU,HIST1H2BD,HMGB2,HIST1H1E,HIST1H2BC,HIST1H1B,HIST2H3D,CASC5,CENPA,HIST1H1C,HIST1H4J,HIST1H2BK,HIST1H3J,HIST3H2A,CENPW,HIST2H2BE,HIST2H3C,HIST1H2BL,HIST1H4H,HIST1H3D,HIST1H4C,CENPN,HIST2H3A,HMGA1,HJURP,H2AFX,HIST2H2BF,ANP32E,HIST1H2BJ,HIST3H2BB,HIST1H2BN
GO:0007346	Regulation of mitotic cell cycle	65	676	0.58	1.56e-16	9606.ENSP00000166345,9606.ENSP00000209728,9606.ENSP00000216911,9606.ENSP00000244745,9606.ENSP00000247191,9606.ENSP00000256442,9606.ENSP00000257934,9606.ENSP00000260731,9606.ENSP00000261597,9606.ENSP00000262300,9606.ENSP00000265148,9606.ENSP00000265748,9606.ENSP00000270861,9606.ENSP00000275517,9606.ENSP00000287598,9606.ENSP00000296509,9606.ENSP00000297265,9606.ENSP00000297338,9606.ENSP00000300093,…	TRIP13,CDC6,AURKA,SOX4,DLGAP5,CCNB1,ESPL1,KIF11,NDC80,PKMYT1,CENPE,ANLN,PLK4,CDCA5,BUB1B,MAD2L1,CHMP4C,RAD21,PLK1,TPX2,CDT1,BIRC5,BUB1,MTBP,CDC25A,CKS1B,CLSPN,AURKB,GEN1,EZH2,CDC25C,E2F7,TACC3,EIF4EBP1,E2F1,BLM,RBM38,UBE2C,CENPF,DTL,NEK2,KIF14,MKI67,TTK,PSRC1,CDC20,RCC1,ZWINT,CKS2,UBD,PCNA,FOXC1,HMMR,PTTG1,MST4,INCENP,CDK1,GPSM2,CDC7,RANBP1,CDC45,TOP2A,CDKN2A,NUSAP1,E2F8
GO:0006333	Chromatin assembly or disassembly	36	193	0.87	2.57e-16	9606.ENSP00000244534,9606.ENSP00000244573,9606.ENSP00000263382,9606.ENSP00000265056,9606.ENSP00000281453,9606.ENSP00000289316,9606.ENSP00000296503,9606.ENSP00000307705,9606.ENSP00000321744,9606.ENSP00000330074,9606.ENSP00000333277,9606.ENSP00000335463,9606.ENSP00000336868,9606.ENSP00000339566,9606.ENSP00000347168,9606.ENSP00000349430,9606.ENSP00000352252,9606.ENSP00000355656,9606.ENSP00000357308,…	HIST1H1D,HIST1H1A,ASF1B,MCM2,CENPU,HIST1H2BD,HMGB2,HIST1H1E,HIST1H2BC,HIST1H1B,HIST2H3D,CASC5,CENPA,HIST1H1C,HIST1H4J,HIST1H2BK,HIST1H3J,HIST3H2A,CENPW,HIST2H2BE,HIST2H3C,HIST1H2BL,HIST1H4H,HIST1H3D,HIST1H4C,CENPN,HELLS,HIST2H3A,HMGA1,HJURP,CDKN2A,H2AFX,HIST2H2BF,HIST1H2BJ,HIST3H2BB,HIST1H2BN
GO:0006259	DNA metabolic process	68	750	0.56	3.6e-16	9606.ENSP00000160827,9606.ENSP00000166345,9606.ENSP00000209728,9606.ENSP00000216122,9606.ENSP00000219097,9606.ENSP00000221486,9606.ENSP00000228843,9606.ENSP00000240488,9606.ENSP00000259008,9606.ENSP00000262105,9606.ENSP00000262643,9606.ENSP00000264233,9606.ENSP00000264596,9606.ENSP00000265056,9606.ENSP00000275517,9606.ENSP00000296503,9606.ENSP00000297338,9606.ENSP00000300035,9606.ENSP00000301634,…	KIF22,TRIP13,CDC6,MCM5,ORC6,RNASEH2A,RAD51AP1,MND1,BRIP1,MCM4,CCNE1,POLQ,NEIL3,MCM2,CDCA5,HMGB2,RAD21,KIAA0101,TK1,FEN1,MCM7,RMI2,FANCI,CLSPN,EXOSC4,TYMS,GEN1,EZH2,DCTPP1,APOBEC3B,PIF1,LIN9,NME1,FOXM1,HIST1H4J,BLM,WDHD1,EXO1,HIST3H2A,CENPF,DTL,UBE2T,TDRKH,HMGB3,RAD54L,HIST1H4H,HIST1H4C,PCNA,ISG15,RAD51,FANCA,RFC4,PTTG1,HELLS,CDK1,CBSL,TONSL,CDC7,HMGA1,CDC45,TOP2A,MCM10,CCNE2,PGBD5,H2AFX,KPNA2,MCM…
GO:0033045	Regulation of sister chromatid segregation	26	83	1.1	4.6e-16	9606.ENSP00000166345,9606.ENSP00000209728,9606.ENSP00000247191,9606.ENSP00000256442,9606.ENSP00000257934,9606.ENSP00000261597,9606.ENSP00000265148,9606.ENSP00000275517,9606.ENSP00000287598,9606.ENSP00000296509,9606.ENSP00000297338,9606.ENSP00000300093,9606.ENSP00000301019,9606.ENSP00000301633,9606.ENSP00000302530,9606.ENSP00000305480,9606.ENSP00000310356,9606.ENSP00000313950,9606.ENSP00000318977,…	TRIP13,CDC6,DLGAP5,CCNB1,ESPL1,NDC80,CENPE,CDCA5,BUB1B,MAD2L1,RAD21,PLK1,CDT1,BIRC5,BUB1,FEN1,RMI2,AURKB,GEN1,TACC3,MAPK15,UBE2C,CENPF,TTK,CDC20,PTTG1
GO:0006260	DNA replication	36	205	0.84	1.32e-15	9606.ENSP00000209728,9606.ENSP00000216122,9606.ENSP00000219097,9606.ENSP00000221486,9606.ENSP00000259008,9606.ENSP00000262105,9606.ENSP00000262643,9606.ENSP00000264233,9606.ENSP00000265056,9606.ENSP00000265728,9606.ENSP00000300035,9606.ENSP00000301019,9606.ENSP00000305480,9606.ENSP00000307288,9606.ENSP00000310356,9606.ENSP00000312995,9606.ENSP00000318977,9606.ENSP00000322180,9606.ENSP00000328174,…	CDC6,MCM5,ORC6,RNASEH2A,BRIP1,MCM4,CCNE1,POLQ,MCM2,DBF4,KIAA0101,CDT1,FEN1,MCM7,RMI2,CLSPN,GEN1,DSCC1,PIF1,BLM,RRM2,WDHD1,EXO1,DTL,PCNA,RAD51,RFC4,CDK1,TONSL,CDC7,HMGA1,CDC45,MCM10,CCNE2,MCM3,RECQL4
GO:0007052	Mitotic spindle organization	25	81	1.09	2.75e-15	9606.ENSP00000216911,9606.ENSP00000217026,9606.ENSP00000256442,9606.ENSP00000260363,9606.ENSP00000260731,9606.ENSP00000261597,9606.ENSP00000265148,9606.ENSP00000271452,9606.ENSP00000296484,9606.ENSP00000300403,9606.ENSP00000301633,9606.ENSP00000313950,9606.ENSP00000326550,9606.ENSP00000355966,9606.ENSP00000358813,9606.ENSP00000360944,9606.ENSP00000361540,9606.ENSP00000362937,9606.ENSP00000363524,…	AURKA,MYBL2,CCNB1,KIF23,KIF11,NDC80,CENPE,NUF2,POC1A,TPX2,BIRC5,AURKB,TACC3,NEK2,TTK,STIL,CDC20,RCC1,KIF4A,PRC1,WDR62,GPSM2,KIFC1,RACGAP1,STMN1
GO:1905818	Regulation of chromosome separation	23	65	1.15	4.8e-15	9606.ENSP00000166345,9606.ENSP00000209728,9606.ENSP00000247191,9606.ENSP00000256442,9606.ENSP00000257934,9606.ENSP00000261597,9606.ENSP00000265148,9606.ENSP00000287598,9606.ENSP00000296509,9606.ENSP00000297338,9606.ENSP00000300093,9606.ENSP00000301019,9606.ENSP00000301633,9606.ENSP00000302530,9606.ENSP00000313950,9606.ENSP00000318977,9606.ENSP00000326550,9606.ENSP00000337691,9606.ENSP00000348838,…	TRIP13,CDC6,DLGAP5,CCNB1,ESPL1,NDC80,CENPE,BUB1B,MAD2L1,RAD21,PLK1,CDT1,BIRC5,BUB1,AURKB,GEN1,TACC3,MAPK15,UBE2C,CENPF,TTK,CDC20,PTTG1
GO:0010965	Regulation of mitotic sister chromatid separation	22	60	1.16	1.31e-14	9606.ENSP00000166345,9606.ENSP00000209728,9606.ENSP00000247191,9606.ENSP00000256442,9606.ENSP00000257934,9606.ENSP00000261597,9606.ENSP00000265148,9606.ENSP00000287598,9606.ENSP00000296509,9606.ENSP00000297338,9606.ENSP00000300093,9606.ENSP00000301019,9606.ENSP00000301633,9606.ENSP00000302530,9606.ENSP00000313950,9606.ENSP00000318977,9606.ENSP00000326550,9606.ENSP00000348838,9606.ENSP00000355922,…	TRIP13,CDC6,DLGAP5,CCNB1,ESPL1,NDC80,CENPE,BUB1B,MAD2L1,RAD21,PLK1,CDT1,BIRC5,BUB1,AURKB,GEN1,TACC3,UBE2C,CENPF,TTK,CDC20,PTTG1
GO:1901987	Regulation of cell cycle phase transition	50	452	0.64	1.35e-14	9606.ENSP00000166345,9606.ENSP00000209728,9606.ENSP00000216911,9606.ENSP00000244745,9606.ENSP00000247191,9606.ENSP00000256442,9606.ENSP00000257934,9606.ENSP00000261597,9606.ENSP00000265148,9606.ENSP00000265728,9606.ENSP00000265748,9606.ENSP00000270861,9606.ENSP00000275517,9606.ENSP00000287598,9606.ENSP00000296509,9606.ENSP00000297265,9606.ENSP00000297338,9606.ENSP00000300093,9606.ENSP00000300403,…	TRIP13,CDC6,AURKA,SOX4,DLGAP5,CCNB1,ESPL1,NDC80,CENPE,DBF4,ANLN,PLK4,CDCA5,BUB1B,MAD2L1,CHMP4C,RAD21,PLK1,TPX2,CDT1,BIRC5,BUB1,MTBP,CDC25A,CLSPN,AURKB,GEN1,EZH2,CDC25C,E2F7,MAPK15,E2F1,BLM,RBM38,UBE2C,CENPF,DTL,NEK2,KIF14,TTK,CDC20,UBD,PCNA,HMMR,CDK1,CDC7,CDC45,CDKN2A,E2F8,FAM83D
GO:0007051	Spindle organization	30	145	0.92	1.64e-14	9606.ENSP00000216911,9606.ENSP00000217026,9606.ENSP00000256442,9606.ENSP00000257934,9606.ENSP00000260363,9606.ENSP00000260731,9606.ENSP00000261597,9606.ENSP00000265148,9606.ENSP00000271452,9606.ENSP00000296484,9606.ENSP00000300403,9606.ENSP00000301633,9606.ENSP00000313950,9606.ENSP00000323300,9606.ENSP00000326550,9606.ENSP00000355966,9606.ENSP00000356379,9606.ENSP00000357308,9606.ENSP00000358813,…	AURKA,MYBL2,CCNB1,ESPL1,KIF23,KIF11,NDC80,CENPE,NUF2,POC1A,TPX2,BIRC5,AURKB,SPAG5,TACC3,NEK2,ASPM,CENPW,TTK,STIL,CDC20,RCC1,KIF4A,PRC1,INCENP,WDR62,GPSM2,KIFC1,RACGAP1,STMN1
GO:1901990	Regulation of mitotic cell cycle phase transition	47	416	0.65	5.79e-14	9606.ENSP00000166345,9606.ENSP00000209728,9606.ENSP00000216911,9606.ENSP00000244745,9606.ENSP00000247191,9606.ENSP00000256442,9606.ENSP00000257934,9606.ENSP00000261597,9606.ENSP00000265148,9606.ENSP00000265748,9606.ENSP00000270861,9606.ENSP00000275517,9606.ENSP00000287598,9606.ENSP00000296509,9606.ENSP00000297265,9606.ENSP00000297338,9606.ENSP00000300093,9606.ENSP00000300403,9606.ENSP00000301019,…	TRIP13,CDC6,AURKA,SOX4,DLGAP5,CCNB1,ESPL1,NDC80,CENPE,ANLN,PLK4,CDCA5,BUB1B,MAD2L1,CHMP4C,RAD21,PLK1,TPX2,CDT1,BIRC5,BUB1,MTBP,CDC25A,CLSPN,AURKB,GEN1,EZH2,CDC25C,E2F7,E2F1,BLM,RBM38,UBE2C,CENPF,DTL,NEK2,KIF14,TTK,CDC20,UBD,PCNA,HMMR,CDK1,CDC7,CDC45,CDKN2A,E2F8
GO:1902099	Regulation of metaphase/anaphase transition of cell cycle	21	58	1.16	7.77e-14	9606.ENSP00000166345,9606.ENSP00000209728,9606.ENSP00000247191,9606.ENSP00000256442,9606.ENSP00000257934,9606.ENSP00000261597,9606.ENSP00000265148,9606.ENSP00000287598,9606.ENSP00000296509,9606.ENSP00000297338,9606.ENSP00000300093,9606.ENSP00000301019,9606.ENSP00000301633,9606.ENSP00000302530,9606.ENSP00000313950,9606.ENSP00000318977,9606.ENSP00000337691,9606.ENSP00000348838,9606.ENSP00000355922,…	TRIP13,CDC6,DLGAP5,CCNB1,ESPL1,NDC80,CENPE,BUB1B,MAD2L1,RAD21,PLK1,CDT1,BIRC5,BUB1,AURKB,GEN1,MAPK15,UBE2C,CENPF,TTK,CDC20
GO:0000075	Cell cycle checkpoint	33	198	0.82	1.13e-13	9606.ENSP00000166345,9606.ENSP00000209728,9606.ENSP00000216911,9606.ENSP00000244745,9606.ENSP00000256442,9606.ENSP00000259008,9606.ENSP00000287598,9606.ENSP00000296509,9606.ENSP00000297265,9606.ENSP00000300093,9606.ENSP00000301019,9606.ENSP00000301633,9606.ENSP00000302530,9606.ENSP00000312995,9606.ENSP00000313950,9606.ENSP00000321656,9606.ENSP00000322568,9606.ENSP00000323246,9606.ENSP00000345571,…	TRIP13,CDC6,AURKA,SOX4,CCNB1,BRIP1,BUB1B,MAD2L1,CHMP4C,PLK1,CDT1,BIRC5,BUB1,CLSPN,AURKB,CDC25C,SOX11,E2F7,E2F1,BLM,RBM38,HORMAD1,CENPF,DTL,TTK,CDC20,ZWINT,PCNA,CDK1,CDC45,TOP2A,H2AFX,E2F8
GO:0000226	Microtubule cytoskeleton organization	50	492	0.61	2.71e-13	9606.ENSP00000216911,9606.ENSP00000217026,9606.ENSP00000229239,9606.ENSP00000256442,9606.ENSP00000257934,9606.ENSP00000260363,9606.ENSP00000260731,9606.ENSP00000261597,9606.ENSP00000263181,9606.ENSP00000263753,9606.ENSP00000265148,9606.ENSP00000270861,9606.ENSP00000271452,9606.ENSP00000296484,9606.ENSP00000296509,9606.ENSP00000300035,9606.ENSP00000300093,9606.ENSP00000300403,9606.ENSP00000301072,…	AURKA,MYBL2,GAPDH,CCNB1,ESPL1,KIF23,KIF11,NDC80,KIF18A,SGOL1,CENPE,PLK4,NUF2,POC1A,MAD2L1,KIAA0101,PLK1,TPX2,TUBA1C,BIRC5,AURKB,SPAG5,TACC3,CENPA,NEK2,ASPM,CENPW,TTK,PSRC1,STIL,KIF2C,CDC20,RCC1,KIF4A,CALML5,TTLL4,PRC1,INCENP,KIF20A,CDK1,WDR62,GPSM2,SAPCD2,KIFC1,RACGAP1,STMN1,GAS2L3,ENSG00000258947,NUSAP1,KIF18B
GO:0140013	Meiotic nuclear division	29	152	0.88	3.13e-13	9606.ENSP00000166345,9606.ENSP00000216911,9606.ENSP00000240423,9606.ENSP00000240488,9606.ENSP00000257934,9606.ENSP00000259008,9606.ENSP00000262643,9606.ENSP00000263181,9606.ENSP00000263753,9606.ENSP00000271452,9606.ENSP00000287598,9606.ENSP00000297338,9606.ENSP00000300093,9606.ENSP00000302530,9606.ENSP00000349961,9606.ENSP00000350162,9606.ENSP00000355167,9606.ENSP00000356379,9606.ENSP00000357812,…	TRIP13,AURKA,NCAPH,MND1,ESPL1,BRIP1,CCNE1,KIF18A,SGOL1,NUF2,BUB1B,RAD21,PLK1,BUB1,SMC4,SYCP2,HORMAD1,ASPM,TDRKH,TTK,RAD54L,CKS2,RAD51,FANCA,PTTG1,INCENP,TOP2A,CCNE2,MYBL1
GO:1903046	Meiotic cell cycle process	30	165	0.86	3.13e-13	9606.ENSP00000166345,9606.ENSP00000216911,9606.ENSP00000240423,9606.ENSP00000240488,9606.ENSP00000257934,9606.ENSP00000259008,9606.ENSP00000262643,9606.ENSP00000263181,9606.ENSP00000263753,9606.ENSP00000271452,9606.ENSP00000287598,9606.ENSP00000297338,9606.ENSP00000300093,9606.ENSP00000302530,9606.ENSP00000325017,9606.ENSP00000349961,9606.ENSP00000350162,9606.ENSP00000355167,9606.ENSP00000356379,…	TRIP13,AURKA,NCAPH,MND1,ESPL1,BRIP1,CCNE1,KIF18A,SGOL1,NUF2,BUB1B,RAD21,PLK1,BUB1,NCAPD2,SMC4,SYCP2,HORMAD1,ASPM,TDRKH,TTK,RAD54L,CKS2,RAD51,FANCA,PTTG1,INCENP,TOP2A,CCNE2,MYBL1
GO:0030071	Regulation of mitotic metaphase/anaphase transition	20	56	1.15	4.46e-13	9606.ENSP00000166345,9606.ENSP00000209728,9606.ENSP00000247191,9606.ENSP00000256442,9606.ENSP00000257934,9606.ENSP00000261597,9606.ENSP00000265148,9606.ENSP00000287598,9606.ENSP00000296509,9606.ENSP00000297338,9606.ENSP00000300093,9606.ENSP00000301019,9606.ENSP00000301633,9606.ENSP00000302530,9606.ENSP00000313950,9606.ENSP00000318977,9606.ENSP00000348838,9606.ENSP00000355922,9606.ENSP00000358813,…	TRIP13,CDC6,DLGAP5,CCNB1,ESPL1,NDC80,CENPE,BUB1B,MAD2L1,RAD21,PLK1,CDT1,BIRC5,BUB1,AURKB,GEN1,UBE2C,CENPF,TTK,CDC20
GO:0044843	Cell cycle g1/s phase transition	27	130	0.92	4.82e-13	9606.ENSP00000209728,9606.ENSP00000216122,9606.ENSP00000219097,9606.ENSP00000242208,9606.ENSP00000262105,9606.ENSP00000262643,9606.ENSP00000265056,9606.ENSP00000265728,9606.ENSP00000274026,9606.ENSP00000301019,9606.ENSP00000303706,9606.ENSP00000307288,9606.ENSP00000315644,9606.ENSP00000323246,9606.ENSP00000335357,9606.ENSP00000340691,9606.ENSP00000345571,9606.ENSP00000353770,9606.ENSP00000354451,…	CDC6,MCM5,ORC6,INHBA,MCM4,CCNE1,MCM2,DBF4,CCNA2,CDT1,CDC25A,MCM7,TYMS,E2F7,CDKN3,EIF4EBP1,E2F1,RRM2,IQGAP3,RCC1,PCNA,CDC7,CDC45,MCM10,CDKN2A,CCNE2,MCM3
GO:0033044	Regulation of chromosome organization	42	359	0.67	7.18e-13	9606.ENSP00000166345,9606.ENSP00000209728,9606.ENSP00000244534,9606.ENSP00000244573,9606.ENSP00000247191,9606.ENSP00000256442,9606.ENSP00000257934,9606.ENSP00000261597,9606.ENSP00000265056,9606.ENSP00000265148,9606.ENSP00000275517,9606.ENSP00000280326,9606.ENSP00000287394,9606.ENSP00000287598,9606.ENSP00000295688,9606.ENSP00000296509,9606.ENSP00000297338,9606.ENSP00000300093,9606.ENSP00000301019,…	TRIP13,CDC6,HIST1H1D,HIST1H1A,DLGAP5,CCNB1,ESPL1,NDC80,MCM2,CENPE,CDCA5,CCT5,ATAD2,BUB1B,CCT3,MAD2L1,RAD21,PLK1,CDT1,BIRC5,BUB1,FEN1,HIST1H1E,RMI2,AURKB,GEN1,TACC3,PIF1,HIST1H1B,MAPK15,HIST1H1C,UBE2C,CENPF,NEK2,MKI67,TTK,CDC20,PTTG1,HMGA1,CDC45,TOP2A,VEGFA
GO:0051321	Meiotic cell cycle	33	220	0.78	1.46e-12	9606.ENSP00000166345,9606.ENSP00000216911,9606.ENSP00000240423,9606.ENSP00000240488,9606.ENSP00000257934,9606.ENSP00000259008,9606.ENSP00000262643,9606.ENSP00000263181,9606.ENSP00000263753,9606.ENSP00000271452,9606.ENSP00000287598,9606.ENSP00000297338,9606.ENSP00000300093,9606.ENSP00000302530,9606.ENSP00000325017,9606.ENSP00000349961,9606.ENSP00000350162,9606.ENSP00000355167,9606.ENSP00000355506,…	TRIP13,AURKA,NCAPH,MND1,ESPL1,BRIP1,CCNE1,KIF18A,SGOL1,NUF2,BUB1B,RAD21,PLK1,BUB1,NCAPD2,SMC4,SYCP2,HORMAD1,EXO1,NEK2,ASPM,TDRKH,TTK,RAD54L,CKS2,RAD51,FANCA,PTTG1,INCENP,TOP2A,CCNE2,MYBL1,H2AFX
GO:0000082	G1/S transition of mitotic cell cycle	26	128	0.91	2.44e-12	9606.ENSP00000209728,9606.ENSP00000216122,9606.ENSP00000219097,9606.ENSP00000242208,9606.ENSP00000262105,9606.ENSP00000262643,9606.ENSP00000265056,9606.ENSP00000265728,9606.ENSP00000301019,9606.ENSP00000303706,9606.ENSP00000307288,9606.ENSP00000315644,9606.ENSP00000323246,9606.ENSP00000335357,9606.ENSP00000340691,9606.ENSP00000345571,9606.ENSP00000353770,9606.ENSP00000354451,9606.ENSP00000362937,…	CDC6,MCM5,ORC6,INHBA,MCM4,CCNE1,MCM2,DBF4,CDT1,CDC25A,MCM7,TYMS,E2F7,CDKN3,EIF4EBP1,E2F1,RRM2,IQGAP3,RCC1,PCNA,CDC7,CDC45,MCM10,CDKN2A,CCNE2,MCM3
GO:0010948	Negative regulation of cell cycle process	39	328	0.67	4.41e-12	9606.ENSP00000166345,9606.ENSP00000209728,9606.ENSP00000215754,9606.ENSP00000216911,9606.ENSP00000244745,9606.ENSP00000256442,9606.ENSP00000257934,9606.ENSP00000287598,9606.ENSP00000296509,9606.ENSP00000297265,9606.ENSP00000297338,9606.ENSP00000300093,9606.ENSP00000301019,9606.ENSP00000301633,9606.ENSP00000302530,9606.ENSP00000303398,9606.ENSP00000312995,9606.ENSP00000313950,9606.ENSP00000320147,…	TRIP13,CDC6,MIF,AURKA,SOX4,CCNB1,ESPL1,BUB1B,MAD2L1,CHMP4C,RAD21,PLK1,CDT1,BIRC5,BUB1,MTBP,CLSPN,AURKB,EZH2,CALR,CDC25C,E2F7,E2F1,BLM,RBM38,RRM2,HORMAD1,CENPF,DTL,NEK2,TTK,CDC20,PCNA,RAD51,PTTG1,CDK1,CDC7,CDKN2A,E2F8
GO:0007017	Microtubule-based process	59	727	0.51	5.74e-12	9606.ENSP00000160827,9606.ENSP00000184183,9606.ENSP00000216911,9606.ENSP00000217026,9606.ENSP00000229239,9606.ENSP00000247191,9606.ENSP00000256442,9606.ENSP00000257934,9606.ENSP00000260363,9606.ENSP00000260731,9606.ENSP00000261597,9606.ENSP00000263181,9606.ENSP00000263753,9606.ENSP00000265148,9606.ENSP00000270861,9606.ENSP00000271452,9606.ENSP00000296484,9606.ENSP00000296509,9606.ENSP00000300035,…	KIF22,ROPN1,AURKA,MYBL2,GAPDH,DLGAP5,CCNB1,ESPL1,KIF23,KIF11,NDC80,KIF18A,SGOL1,CENPE,PLK4,NUF2,POC1A,MAD2L1,KIAA0101,PLK1,TPX2,TUBA1C,BIRC5,AURKB,SPAG5,KIF15,TACC3,CENPA,NEK2,KIF14,ASPM,CENPW,TTK,PSRC1,STIL,KIF2C,CDC20,RCC1,KIF4A,CALML5,TTLL4,PRC1,INCENP,KIF20A,CDK1,DNAH14,WDR62,GPSM2,SAPCD2,KIFC1,RACGAP1,STMN1,ROPN1B,KIF1A,GAS2L3,ENSG00000258947,NUSAP1,CCDC64B,KIF18B
GO:0006974	Cellular response to dna damage stimulus	61	793	0.49	1.8e-11	9606.ENSP00000160827,9606.ENSP00000166345,9606.ENSP00000215754,9606.ENSP00000216122,9606.ENSP00000216911,9606.ENSP00000221486,9606.ENSP00000228843,9606.ENSP00000244745,9606.ENSP00000256442,9606.ENSP00000259008,9606.ENSP00000262105,9606.ENSP00000264233,9606.ENSP00000264596,9606.ENSP00000265056,9606.ENSP00000267953,9606.ENSP00000275517,9606.ENSP00000296503,9606.ENSP00000297338,9606.ENSP00000300035,…	KIF22,TRIP13,MIF,MCM5,AURKA,RNASEH2A,RAD51AP1,SOX4,CCNB1,BRIP1,MCM4,POLQ,NEIL3,MCM2,BCL2A1,CDCA5,HMGB2,RAD21,KIAA0101,PLK1,FEN1,MCM7,RMI2,FANCI,CLSPN,GEN1,CDC25C,E2F7,PMAIP1,PIF1,MAPK15,FOXM1,E2F1,HIST1H4J,BLM,RBM38,WDHD1,EXO1,HIST3H2A,DTL,UBE2T,RAD54L,HIST1H4H,HIST1H4C,PCNA,ISG15,RAD51,FANCA,RFC4,PTTG1,CDK1,TONSL,CDC7,HMGA1,CDC45,TOP2A,MCM10,H2AFX,MCM3,E2F8,RECQL4
GO:0030261	Chromosome condensation	16	42	1.18	1.24e-10	9606.ENSP00000240423,9606.ENSP00000244534,9606.ENSP00000244573,9606.ENSP00000251496,9606.ENSP00000256442,9606.ENSP00000275517,9606.ENSP00000307705,9606.ENSP00000325017,9606.ENSP00000330074,9606.ENSP00000339566,9606.ENSP00000349961,9606.ENSP00000378295,9606.ENSP00000378699,9606.ENSP00000387007,9606.ENSP00000411532,9606.ENSP00000453403	NCAPH,HIST1H1D,HIST1H1A,NCAPG,CCNB1,CDCA5,HIST1H1E,NCAPD2,HIST1H1B,HIST1H1C,SMC4,INCENP,CDK1,NCAPG2,TOP2A,NUSAP1
GO:0007093	Mitotic cell cycle checkpoint	26	156	0.82	1.31e-10	9606.ENSP00000166345,9606.ENSP00000209728,9606.ENSP00000216911,9606.ENSP00000244745,9606.ENSP00000256442,9606.ENSP00000287598,9606.ENSP00000296509,9606.ENSP00000297265,9606.ENSP00000300093,9606.ENSP00000301633,9606.ENSP00000302530,9606.ENSP00000312995,9606.ENSP00000313950,9606.ENSP00000321656,9606.ENSP00000323246,9606.ENSP00000345571,9606.ENSP00000347232,9606.ENSP00000348538,9606.ENSP00000355922,…	TRIP13,CDC6,AURKA,SOX4,CCNB1,BUB1B,MAD2L1,CHMP4C,PLK1,BIRC5,BUB1,CLSPN,AURKB,CDC25C,E2F7,E2F1,BLM,RBM38,CENPF,TTK,CDC20,ZWINT,PCNA,CDK1,TOP2A,E2F8
GO:0045786	Negative regulation of cell cycle	49	571	0.53	1.59e-10	9606.ENSP00000166345,9606.ENSP00000209728,9606.ENSP00000215754,9606.ENSP00000216911,9606.ENSP00000242208,9606.ENSP00000244745,9606.ENSP00000256442,9606.ENSP00000257934,9606.ENSP00000259008,9606.ENSP00000287598,9606.ENSP00000296509,9606.ENSP00000297265,9606.ENSP00000297338,9606.ENSP00000300093,9606.ENSP00000301019,9606.ENSP00000301633,9606.ENSP00000302530,9606.ENSP00000303398,9606.ENSP00000306512,…	TRIP13,CDC6,MIF,AURKA,INHBA,SOX4,CCNB1,ESPL1,BRIP1,BUB1B,MAD2L1,CHMP4C,RAD21,PLK1,CDT1,BIRC5,BUB1,MTBP,CXCL8,CLSPN,AURKB,EZH2,CALR,CDC25C,SOX11,E2F7,CDKN3,E2F1,BLM,RBM38,RRM2,HORMAD1,CENPF,DTL,NEK2,TTK,CDC20,ZWINT,PCNA,FOXC1,RAD51,PTTG1,CDK1,CDC7,CDC45,TOP2A,CDKN2A,H2AFX,E2F8
GO:0006261	DNA-dependent DNA replication	23	119	0.89	1.95e-10	9606.ENSP00000209728,9606.ENSP00000216122,9606.ENSP00000219097,9606.ENSP00000262105,9606.ENSP00000262643,9606.ENSP00000264233,9606.ENSP00000265056,9606.ENSP00000301019,9606.ENSP00000305480,9606.ENSP00000307288,9606.ENSP00000318977,9606.ENSP00000347232,9606.ENSP00000353793,9606.ENSP00000368458,9606.ENSP00000372088,9606.ENSP00000376272,9606.ENSP00000386239,9606.ENSP00000399888,9606.ENSP00000405726,…	CDC6,MCM5,ORC6,MCM4,CCNE1,POLQ,MCM2,CDT1,FEN1,MCM7,GEN1,BLM,WDHD1,PCNA,RAD51,RFC4,TONSL,HMGA1,CDC45,MCM10,CCNE2,MCM3,RECQL4
GO:0051303	Establishment of chromosome localization	19	73	1.01	2.18e-10	9606.ENSP00000160827,9606.ENSP00000247191,9606.ENSP00000256442,9606.ENSP00000261597,9606.ENSP00000263181,9606.ENSP00000265148,9606.ENSP00000271452,9606.ENSP00000275517,9606.ENSP00000297265,9606.ENSP00000301019,9606.ENSP00000301633,9606.ENSP00000355922,9606.ENSP00000356319,9606.ENSP00000358925,9606.ENSP00000361298,9606.ENSP00000362146,9606.ENSP00000378295,9606.ENSP00000393963,9606.ENSP00000481110	KIF22,DLGAP5,CCNB1,NDC80,KIF18A,CENPE,NUF2,CDCA5,CHMP4C,CDT1,BIRC5,CENPF,KIF14,PSRC1,KIF2C,CDCA8,INCENP,KIFC1,FAM83D
GO:0051310	Metaphase plate congression	17	54	1.1	2.64e-10	9606.ENSP00000160827,9606.ENSP00000256442,9606.ENSP00000261597,9606.ENSP00000263181,9606.ENSP00000265148,9606.ENSP00000271452,9606.ENSP00000275517,9606.ENSP00000297265,9606.ENSP00000301019,9606.ENSP00000355922,9606.ENSP00000356319,9606.ENSP00000358925,9606.ENSP00000361298,9606.ENSP00000362146,9606.ENSP00000378295,9606.ENSP00000393963,9606.ENSP00000481110	KIF22,CCNB1,NDC80,KIF18A,CENPE,NUF2,CDCA5,CHMP4C,CDT1,CENPF,KIF14,PSRC1,KIF2C,CDCA8,INCENP,KIFC1,FAM83D
GO:0006325	Chromatin organization	55	713	0.49	2.76e-10	9606.ENSP00000216911,9606.ENSP00000244534,9606.ENSP00000244573,9606.ENSP00000256442,9606.ENSP00000263382,9606.ENSP00000265056,9606.ENSP00000274026,9606.ENSP00000281453,9606.ENSP00000287394,9606.ENSP00000289316,9606.ENSP00000296417,9606.ENSP00000296503,9606.ENSP00000307705,9606.ENSP00000308750,9606.ENSP00000313950,9606.ENSP00000320147,9606.ENSP00000321744,9606.ENSP00000330074,9606.ENSP00000332790,…	AURKA,HIST1H1D,HIST1H1A,CCNB1,ASF1B,MCM2,CCNA2,CENPU,ATAD2,HIST1H2BD,H2AFZ,HMGB2,HIST1H1E,CBX2,AURKB,EZH2,HIST1H2BC,HIST1H1B,HIST2H2AB,HIST2H3D,CASC5,CENPA,CDCA4,HIST1H1C,HIST1H2AD,HIST1H4J,HIST1H2BK,HIST1H2AI,HIST1H2AG,HIST1H3J,HIST3H2A,CENPW,HIST2H2BE,HIST2H3C,HIST2H2AA,HMGB3,SRPK1,HIST1H2BL,HIST1H4H,HIST1H3D,HIST1H4C,CENPN,HELLS,INCENP,CDK1,HIST2H3A,HMGA1,HJURP,CDKN2A,H2AFX,HIST2H2BF,ANP32E,HI…
GO:0006281	DNA repair	46	522	0.54	3.3e-10	9606.ENSP00000160827,9606.ENSP00000166345,9606.ENSP00000216122,9606.ENSP00000221486,9606.ENSP00000228843,9606.ENSP00000259008,9606.ENSP00000262105,9606.ENSP00000264233,9606.ENSP00000264596,9606.ENSP00000265056,9606.ENSP00000275517,9606.ENSP00000296503,9606.ENSP00000297338,9606.ENSP00000300035,9606.ENSP00000305480,9606.ENSP00000307288,9606.ENSP00000310356,9606.ENSP00000310842,9606.ENSP00000312995,…	KIF22,TRIP13,MCM5,RNASEH2A,RAD51AP1,BRIP1,MCM4,POLQ,NEIL3,MCM2,CDCA5,HMGB2,RAD21,KIAA0101,FEN1,MCM7,RMI2,FANCI,CLSPN,GEN1,PIF1,FOXM1,HIST1H4J,BLM,WDHD1,EXO1,HIST3H2A,DTL,UBE2T,RAD54L,HIST1H4H,HIST1H4C,PCNA,ISG15,RAD51,FANCA,RFC4,PTTG1,CDK1,TONSL,CDC7,HMGA1,CDC45,H2AFX,MCM3,RECQL4
GO:0033043	Regulation of organelle organization	79	1306	0.38	3.67e-10	9606.ENSP00000166345,9606.ENSP00000209728,9606.ENSP00000216911,9606.ENSP00000244534,9606.ENSP00000244573,9606.ENSP00000247191,9606.ENSP00000256442,9606.ENSP00000257934,9606.ENSP00000260731,9606.ENSP00000261597,9606.ENSP00000262300,9606.ENSP00000262428,9606.ENSP00000263181,9606.ENSP00000263867,9606.ENSP00000265056,9606.ENSP00000265148,9606.ENSP00000265748,9606.ENSP00000270861,9606.ENSP00000275517,…	TRIP13,CDC6,AURKA,HIST1H1D,HIST1H1A,DLGAP5,CCNB1,ESPL1,KIF11,NDC80,PKMYT1,COTL1,KIF18A,CAPG,MCM2,CENPE,ANLN,PLK4,CDCA5,CCT5,ATAD2,BUB1B,CCT3,POC1A,MAD2L1,CHMP4C,RAD21,PLK1,TPX2,CDT1,BIRC5,BUB1,MTBP,FEN1,HIST1H1E,RMI2,LRFN4,AURKB,GEN1,SKA3,CALR,CDC25C,SPAG5,PMAIP1,TACC3,PIF1,HIST1H1B,MAPK15,PLAUR,HIST1H1C,E2F1,UBE2C,IQGAP3,HORMAD1,CENPF,NEK2,PFDN2,MKI67,TTK,PSRC1,STIL,MMP9,CDC20,RCC1,CKAP2,SDC1,PT…
GO:0009987	Cellular process	439	15024	0.07	4.55e-10	9606.ENSP00000005286,9606.ENSP00000160827,9606.ENSP00000166345,9606.ENSP00000184183,9606.ENSP00000209718,9606.ENSP00000209728,9606.ENSP00000215743,9606.ENSP00000215754,9606.ENSP00000216122,9606.ENSP00000216127,9606.ENSP00000216911,9606.ENSP00000217026,9606.ENSP00000218230,9606.ENSP00000219097,9606.ENSP00000220751,9606.ENSP00000221486,9606.ENSP00000222598,9606.ENSP00000228843,9606.ENSP00000229239,…	TMEM132A,KIF22,TRIP13,ROPN1,KRT23,CDC6,MMP11,MIF,MCM5,RASD2,AURKA,MYBL2,PCSK1N,ORC6,RIPK2,RNASEH2A,DLX5,RAD51AP1,GAPDH,TPI1,MDFI,DNPH1,HSPE1,VAX2,RDH10,NCAPH,MND1,INHBA,DDX39A,HIST1H1D,HIST1H1A,SOX4,SLURP1,DLGAP5,NCAPG,KRT6B,CHRM3,CHI3L1,CCNB1,TROAP,ESPL1,IGF2BP3,BRIP1,CLPS,MRPL15,GGH,MMP13,KIF23,KIF11,LYZ,LMNB1,NDC80,SLC7A5,MCM4,PKMYT1,IL12RB2,COTL1,CCNE1,PRDX1,BPI,KIF18A,ASF1B,EPCAM,SGOL1,CAPG,…
GO:2001251	Negative regulation of chromosome organization	23	137	0.82	2.24e-09	9606.ENSP00000166345,9606.ENSP00000244534,9606.ENSP00000244573,9606.ENSP00000257934,9606.ENSP00000265056,9606.ENSP00000287394,9606.ENSP00000287598,9606.ENSP00000296509,9606.ENSP00000297338,9606.ENSP00000300093,9606.ENSP00000301633,9606.ENSP00000302530,9606.ENSP00000307705,9606.ENSP00000313950,9606.ENSP00000328174,9606.ENSP00000330074,9606.ENSP00000339566,9606.ENSP00000355922,9606.ENSP00000358813,…	TRIP13,HIST1H1D,HIST1H1A,ESPL1,MCM2,ATAD2,BUB1B,MAD2L1,RAD21,PLK1,BIRC5,BUB1,HIST1H1E,AURKB,PIF1,HIST1H1B,HIST1H1C,CENPF,TTK,CDC20,PTTG1,HMGA1,TOP2A
GO:0061640	Cytoskeleton-dependent cytokinesis	20	98	0.91	2.32e-09	9606.ENSP00000257934,9606.ENSP00000260363,9606.ENSP00000265748,9606.ENSP00000297265,9606.ENSP00000300093,9606.ENSP00000301633,9606.ENSP00000313950,9606.ENSP00000336868,9606.ENSP00000360540,9606.ENSP00000363524,9606.ENSP00000367276,9606.ENSP00000376306,9606.ENSP00000377793,9606.ENSP00000378295,9606.ENSP00000378356,9606.ENSP00000379704,9606.ENSP00000404190,9606.ENSP00000410452,9606.ENSP00000426271,…	ESPL1,KIF23,ANLN,CHMP4C,PLK1,BIRC5,AURKB,CENPA,CEP55,KIF4A,CKAP2,CIT,PRC1,INCENP,KIF20A,SEPT3,RACGAP1,STMN1,ROPN1B,NUSAP1
GO:0045930	Negative regulation of mitotic cell cycle	33	308	0.63	5.01e-09	9606.ENSP00000166345,9606.ENSP00000209728,9606.ENSP00000216911,9606.ENSP00000244745,9606.ENSP00000256442,9606.ENSP00000287598,9606.ENSP00000296509,9606.ENSP00000297265,9606.ENSP00000297338,9606.ENSP00000300093,9606.ENSP00000301019,9606.ENSP00000301633,9606.ENSP00000302530,9606.ENSP00000303398,9606.ENSP00000312995,9606.ENSP00000313950,9606.ENSP00000320147,9606.ENSP00000321656,9606.ENSP00000323246,…	TRIP13,CDC6,AURKA,SOX4,CCNB1,BUB1B,MAD2L1,CHMP4C,RAD21,PLK1,CDT1,BIRC5,BUB1,MTBP,CLSPN,AURKB,EZH2,CDC25C,E2F7,E2F1,BLM,RBM38,CENPF,TTK,CDC20,ZWINT,PCNA,FOXC1,PTTG1,CDK1,TOP2A,CDKN2A,E2F8
GO:0000281	Mitotic cytokinesis	17	70	0.98	7.71e-09	9606.ENSP00000257934,9606.ENSP00000260363,9606.ENSP00000265748,9606.ENSP00000297265,9606.ENSP00000300093,9606.ENSP00000301633,9606.ENSP00000336868,9606.ENSP00000360540,9606.ENSP00000363524,9606.ENSP00000367276,9606.ENSP00000376306,9606.ENSP00000377793,9606.ENSP00000378295,9606.ENSP00000378356,9606.ENSP00000404190,9606.ENSP00000410452,9606.ENSP00000453403	ESPL1,KIF23,ANLN,CHMP4C,PLK1,BIRC5,CENPA,CEP55,KIF4A,CKAP2,CIT,PRC1,INCENP,KIF20A,RACGAP1,STMN1,NUSAP1
GO:0033046	Negative regulation of sister chromatid segregation	13	32	1.21	8.28e-09	9606.ENSP00000166345,9606.ENSP00000257934,9606.ENSP00000287598,9606.ENSP00000296509,9606.ENSP00000297338,9606.ENSP00000300093,9606.ENSP00000301633,9606.ENSP00000302530,9606.ENSP00000313950,9606.ENSP00000355922,9606.ENSP00000358813,9606.ENSP00000361540,9606.ENSP00000377536	TRIP13,ESPL1,BUB1B,MAD2L1,RAD21,PLK1,BIRC5,BUB1,AURKB,CENPF,TTK,CDC20,PTTG1
GO:0097549	Chromatin organization involved in negative regulation of transcription	20	108	0.87	1.01e-08	9606.ENSP00000296417,9606.ENSP00000320147,9606.ENSP00000332790,9606.ENSP00000333277,9606.ENSP00000341094,9606.ENSP00000347168,9606.ENSP00000351589,9606.ENSP00000352119,9606.ENSP00000352252,9606.ENSP00000355656,9606.ENSP00000358154,9606.ENSP00000358155,9606.ENSP00000366956,9606.ENSP00000366999,9606.ENSP00000367034,9606.ENSP00000377601,9606.ENSP00000385479,9606.ENSP00000399888,9606.ENSP00000418915,…	H2AFZ,EZH2,HIST2H2AB,HIST2H3D,HIST1H2AD,HIST1H4J,HIST1H2AI,HIST1H2AG,HIST1H3J,HIST3H2A,HIST2H3C,HIST2H2AA,HIST1H4H,HIST1H3D,HIST1H4C,HELLS,HIST2H3A,HMGA1,CDKN2A,H2AFX
GO:0034401	Chromatin organization involved in regulation of transcription	21	122	0.84	1.09e-08	9606.ENSP00000296417,9606.ENSP00000320147,9606.ENSP00000332790,9606.ENSP00000333277,9606.ENSP00000337226,9606.ENSP00000341094,9606.ENSP00000347168,9606.ENSP00000351589,9606.ENSP00000352119,9606.ENSP00000352252,9606.ENSP00000355656,9606.ENSP00000358154,9606.ENSP00000358155,9606.ENSP00000366956,9606.ENSP00000366999,9606.ENSP00000367034,9606.ENSP00000377601,9606.ENSP00000385479,9606.ENSP00000399888,…	H2AFZ,EZH2,HIST2H2AB,HIST2H3D,CDCA4,HIST1H2AD,HIST1H4J,HIST1H2AI,HIST1H2AG,HIST1H3J,HIST3H2A,HIST2H3C,HIST2H2AA,HIST1H4H,HIST1H3D,HIST1H4C,HELLS,HIST2H3A,HMGA1,CDKN2A,H2AFX
GO:1901988	Negative regulation of cell cycle phase transition	28	235	0.68	1.73e-08	9606.ENSP00000166345,9606.ENSP00000209728,9606.ENSP00000216911,9606.ENSP00000244745,9606.ENSP00000256442,9606.ENSP00000287598,9606.ENSP00000296509,9606.ENSP00000297265,9606.ENSP00000297338,9606.ENSP00000300093,9606.ENSP00000301633,9606.ENSP00000302530,9606.ENSP00000312995,9606.ENSP00000313950,9606.ENSP00000320147,9606.ENSP00000321656,9606.ENSP00000323246,9606.ENSP00000345571,9606.ENSP00000347232,…	TRIP13,CDC6,AURKA,SOX4,CCNB1,BUB1B,MAD2L1,CHMP4C,RAD21,PLK1,BIRC5,BUB1,CLSPN,AURKB,EZH2,CDC25C,E2F7,E2F1,BLM,RBM38,CENPF,DTL,TTK,CDC20,PCNA,CDK1,CDKN2A,E2F8
GO:0006310	DNA recombination	27	219	0.69	1.87e-08	9606.ENSP00000166345,9606.ENSP00000216122,9606.ENSP00000228843,9606.ENSP00000240488,9606.ENSP00000259008,9606.ENSP00000262105,9606.ENSP00000264233,9606.ENSP00000265056,9606.ENSP00000296503,9606.ENSP00000297338,9606.ENSP00000305480,9606.ENSP00000307288,9606.ENSP00000318977,9606.ENSP00000328174,9606.ENSP00000347232,9606.ENSP00000355506,9606.ENSP00000359393,9606.ENSP00000361043,9606.ENSP00000372088,…	TRIP13,MCM5,RAD51AP1,MND1,BRIP1,MCM4,POLQ,MCM2,HMGB2,RAD21,FEN1,MCM7,GEN1,PIF1,BLM,EXO1,HMGB3,RAD54L,RAD51,TONSL,CDC7,CDC45,TOP2A,PGBD5,H2AFX,MCM3,RECQL4
GO:1901991	Negative regulation of mitotic cell cycle phase transition	27	219	0.69	1.87e-08	9606.ENSP00000166345,9606.ENSP00000209728,9606.ENSP00000216911,9606.ENSP00000244745,9606.ENSP00000256442,9606.ENSP00000287598,9606.ENSP00000296509,9606.ENSP00000297265,9606.ENSP00000297338,9606.ENSP00000300093,9606.ENSP00000301633,9606.ENSP00000302530,9606.ENSP00000312995,9606.ENSP00000313950,9606.ENSP00000320147,9606.ENSP00000321656,9606.ENSP00000323246,9606.ENSP00000345571,9606.ENSP00000347232,…	TRIP13,CDC6,AURKA,SOX4,CCNB1,BUB1B,MAD2L1,CHMP4C,RAD21,PLK1,BIRC5,BUB1,CLSPN,AURKB,EZH2,CDC25C,E2F7,E2F1,BLM,RBM38,CENPF,TTK,CDC20,PCNA,CDK1,CDKN2A,E2F8
GO:0007080	Mitotic metaphase plate congression	14	44	1.1	1.9e-08	9606.ENSP00000160827,9606.ENSP00000256442,9606.ENSP00000261597,9606.ENSP00000263181,9606.ENSP00000265148,9606.ENSP00000271452,9606.ENSP00000275517,9606.ENSP00000297265,9606.ENSP00000301019,9606.ENSP00000356319,9606.ENSP00000358925,9606.ENSP00000361298,9606.ENSP00000362146,9606.ENSP00000393963	KIF22,CCNB1,NDC80,KIF18A,CENPE,NUF2,CDCA5,CHMP4C,CDT1,KIF14,PSRC1,KIF2C,CDCA8,KIFC1
GO:2000816	Negative regulation of mitotic sister chromatid separation	12	27	1.25	1.9e-08	9606.ENSP00000166345,9606.ENSP00000287598,9606.ENSP00000296509,9606.ENSP00000297338,9606.ENSP00000300093,9606.ENSP00000301633,9606.ENSP00000302530,9606.ENSP00000313950,9606.ENSP00000355922,9606.ENSP00000358813,9606.ENSP00000361540,9606.ENSP00000377536	TRIP13,BUB1B,MAD2L1,RAD21,PLK1,BIRC5,BUB1,AURKB,CENPF,TTK,CDC20,PTTG1
GO:0045931	Positive regulation of mitotic cell cycle	23	156	0.77	1.92e-08	9606.ENSP00000209728,9606.ENSP00000216911,9606.ENSP00000247191,9606.ENSP00000256442,9606.ENSP00000257934,9606.ENSP00000261597,9606.ENSP00000275517,9606.ENSP00000296509,9606.ENSP00000301019,9606.ENSP00000301633,9606.ENSP00000303398,9606.ENSP00000303706,9606.ENSP00000313950,9606.ENSP00000318977,9606.ENSP00000321656,9606.ENSP00000340691,9606.ENSP00000348838,9606.ENSP00000355958,9606.ENSP00000378699,…	CDC6,AURKA,DLGAP5,CCNB1,ESPL1,NDC80,CDCA5,MAD2L1,CDT1,BIRC5,MTBP,CDC25A,AURKB,GEN1,CDC25C,EIF4EBP1,UBE2C,DTL,CDK1,CDC7,RANBP1,CDC45,NUSAP1
GO:0043933	Protein-containing complex subunit organization	83	1539	0.33	1.95e-08	9606.ENSP00000215754,9606.ENSP00000216122,9606.ENSP00000244534,9606.ENSP00000244573,9606.ENSP00000256442,9606.ENSP00000260102,9606.ENSP00000262105,9606.ENSP00000263181,9606.ENSP00000263382,9606.ENSP00000263867,9606.ENSP00000264233,9606.ENSP00000264552,9606.ENSP00000265056,9606.ENSP00000265148,9606.ENSP00000265748,9606.ENSP00000276689,9606.ENSP00000281453,9606.ENSP00000289316,9606.ENSP00000293599,…	MIF,MCM5,HIST1H1D,HIST1H1A,CCNB1,MRPL15,MCM4,KIF18A,ASF1B,CAPG,POLQ,UBE2S,MCM2,CENPE,ANLN,NDUFB9,CENPU,HIST1H2BD,AQP5,CCT3,HMGB2,TPX2,CDT1,TK1,MRPL13,MCM7,HIST1H1E,CALR,HIST1H2BC,HIST1H1B,HIST2H3D,CASC5,CENPA,HIST1H1C,FN1,HIST1H4J,BLM,UBE2C,HIST1H2BK,HIST1H3J,RRM2,COA6,HIST3H2A,EPRS,CENPF,CENPW,HIST2H2BE,HIST2H3C,GBP5,KCNG1,MRPL14,KIF2C,SRPK1,HIST1H2BL,HIST1H4H,HIST1H3D,HIST1H4C,RAD51,FANCA,CENPN…
GO:0033554	Cellular response to stress	89	1725	0.31	3.12e-08	9606.ENSP00000160827,9606.ENSP00000166345,9606.ENSP00000215754,9606.ENSP00000216122,9606.ENSP00000216911,9606.ENSP00000220751,9606.ENSP00000221486,9606.ENSP00000228843,9606.ENSP00000244745,9606.ENSP00000256442,9606.ENSP00000259008,9606.ENSP00000262105,9606.ENSP00000262746,9606.ENSP00000264233,9606.ENSP00000264596,9606.ENSP00000265056,9606.ENSP00000267953,9606.ENSP00000274026,9606.ENSP00000275517,…	KIF22,TRIP13,MIF,MCM5,AURKA,RIPK2,RNASEH2A,RAD51AP1,SOX4,CCNB1,BRIP1,MCM4,PRDX1,POLQ,NEIL3,MCM2,BCL2A1,CCNA2,CDCA5,DSC2,AQP5,HMGB2,RAD21,MELK,KIAA0101,PLK1,NOD2,SLC39A4,FEN1,CXCL10,CXCL8,MCM7,RMI2,FANCI,CLSPN,GEN1,EZH2,CALR,CDC25C,DCTPP1,E2F7,PMAIP1,PIF1,MAPK15,EIF4EBP1,FOXM1,E2F1,HIST1H4J,BLM,RBM38,WDHD1,EXO1,KIAA1804,HIST3H2A,DTL,UBE2T,HDGF,IRAK1,RAD54L,MMP9,LCN2,EXTL1,HIST1H4H,HIST1H4C,PCNA,IS…
GO:0065003	Protein-containing complex assembly	73	1293	0.35	4.58e-08	9606.ENSP00000215754,9606.ENSP00000216122,9606.ENSP00000244534,9606.ENSP00000244573,9606.ENSP00000256442,9606.ENSP00000262105,9606.ENSP00000263382,9606.ENSP00000263867,9606.ENSP00000264233,9606.ENSP00000264552,9606.ENSP00000265056,9606.ENSP00000265148,9606.ENSP00000265748,9606.ENSP00000276689,9606.ENSP00000281453,9606.ENSP00000289316,9606.ENSP00000293599,9606.ENSP00000295688,9606.ENSP00000296503,…	MIF,MCM5,HIST1H1D,HIST1H1A,CCNB1,MCM4,ASF1B,CAPG,POLQ,UBE2S,MCM2,CENPE,ANLN,NDUFB9,CENPU,HIST1H2BD,AQP5,CCT3,HMGB2,TPX2,CDT1,TK1,MCM7,HIST1H1E,CALR,HIST1H2BC,HIST1H1B,HIST2H3D,CASC5,CENPA,HIST1H1C,FN1,HIST1H4J,BLM,UBE2C,HIST1H2BK,HIST1H3J,RRM2,COA6,EPRS,CENPF,CENPW,HIST2H2BE,HIST2H3C,GBP5,KCNG1,SRPK1,HIST1H2BL,HIST1H4H,HIST1H3D,HIST1H4C,RAD51,FANCA,CENPN,HELLS,CDK1,DIAPH3,HIST2H3A,HMGA1,CDC45,HJU…
GO:0051784	Negative regulation of nuclear division	14	48	1.06	4.63e-08	9606.ENSP00000166345,9606.ENSP00000287598,9606.ENSP00000296509,9606.ENSP00000297338,9606.ENSP00000300093,9606.ENSP00000301633,9606.ENSP00000302530,9606.ENSP00000303398,9606.ENSP00000313950,9606.ENSP00000355167,9606.ENSP00000355922,9606.ENSP00000358813,9606.ENSP00000361540,9606.ENSP00000377536	TRIP13,BUB1B,MAD2L1,RAD21,PLK1,BIRC5,BUB1,MTBP,AURKB,HORMAD1,CENPF,TTK,CDC20,PTTG1
GO:0051302	Regulation of cell division	25	197	0.7	4.79e-08	9606.ENSP00000209728,9606.ENSP00000216911,9606.ENSP00000219097,9606.ENSP00000247191,9606.ENSP00000257934,9606.ENSP00000260363,9606.ENSP00000270861,9606.ENSP00000297265,9606.ENSP00000300093,9606.ENSP00000313950,9606.ENSP00000323246,9606.ENSP00000347232,9606.ENSP00000356319,9606.ENSP00000356379,9606.ENSP00000357189,9606.ENSP00000376306,9606.ENSP00000376753,9606.ENSP00000377793,9606.ENSP00000378295,…	CDC6,AURKA,ORC6,DLGAP5,ESPL1,KIF23,PLK4,CHMP4C,PLK1,AURKB,E2F7,BLM,KIF14,ASPM,HDGF,CIT,GIPC1,PRC1,INCENP,KIF20A,RACGAP1,NUSAP1,KIF18B,VEGFA,E2F8
GO:0045839	Negative regulation of mitotic nuclear division	13	40	1.11	6.51e-08	9606.ENSP00000166345,9606.ENSP00000287598,9606.ENSP00000296509,9606.ENSP00000297338,9606.ENSP00000300093,9606.ENSP00000301633,9606.ENSP00000302530,9606.ENSP00000303398,9606.ENSP00000313950,9606.ENSP00000355922,9606.ENSP00000358813,9606.ENSP00000361540,9606.ENSP00000377536	TRIP13,BUB1B,MAD2L1,RAD21,PLK1,BIRC5,BUB1,MTBP,AURKB,CENPF,TTK,CDC20,PTTG1
GO:0040029	Regulation of gene expression, epigenetic	25	202	0.69	7.54e-08	9606.ENSP00000244534,9606.ENSP00000244573,9606.ENSP00000287394,9606.ENSP00000296417,9606.ENSP00000307705,9606.ENSP00000320147,9606.ENSP00000330074,9606.ENSP00000332790,9606.ENSP00000333277,9606.ENSP00000337226,9606.ENSP00000339566,9606.ENSP00000341094,9606.ENSP00000347168,9606.ENSP00000351589,9606.ENSP00000352119,9606.ENSP00000352252,9606.ENSP00000355656,9606.ENSP00000358154,9606.ENSP00000358155,…	HIST1H1D,HIST1H1A,ATAD2,H2AFZ,HIST1H1E,EZH2,HIST1H1B,HIST2H2AB,HIST2H3D,CDCA4,HIST1H1C,HIST1H2AD,HIST1H4J,HIST1H2AI,HIST1H2AG,HIST1H3J,HIST3H2A,HIST2H3C,HIST2H2AA,HIST1H4H,HIST1H3D,HIST1H4C,HIST2H3A,HMGA1,H2AFX
GO:0022607	Cellular component assembly	109	2359	0.26	8.5e-08	9606.ENSP00000166345,9606.ENSP00000215754,9606.ENSP00000216122,9606.ENSP00000216911,9606.ENSP00000217026,9606.ENSP00000244534,9606.ENSP00000244573,9606.ENSP00000256442,9606.ENSP00000259008,9606.ENSP00000260363,9606.ENSP00000260731,9606.ENSP00000262105,9606.ENSP00000263382,9606.ENSP00000263867,9606.ENSP00000263946,9606.ENSP00000264233,9606.ENSP00000264552,9606.ENSP00000265056,9606.ENSP00000265148,…	TRIP13,MIF,MCM5,AURKA,MYBL2,HIST1H1D,HIST1H1A,CCNB1,BRIP1,KIF23,KIF11,MCM4,ASF1B,CAPG,PKP1,POLQ,UBE2S,MCM2,CENPE,ANLN,SQLE,PLK4,NDUFB9,CENPU,HIST1H2BD,AQP5,CCT3,POC1A,HMGB2,CHMP4C,PLK1,TPX2,CDT1,BIRC5,TK1,MCM7,HIST1H1E,AURKB,CALR,HIST1H2BC,HIST1H1B,HIST2H3D,CDKN3,CASC5,CENPA,HIST1H1C,FN1,HIST1H4J,BLM,UBE2C,HIST1H2BK,SYCP2,HIST1H3J,RRM2,HORMAD1,EXO1,COA6,EPRS,CENPF,NEK2,ASPM,CENPW,HIST2H2BE,HIST2H…
GO:1901989	Positive regulation of cell cycle phase transition	18	99	0.86	9.9e-08	9606.ENSP00000209728,9606.ENSP00000247191,9606.ENSP00000256442,9606.ENSP00000257934,9606.ENSP00000275517,9606.ENSP00000301019,9606.ENSP00000301633,9606.ENSP00000303398,9606.ENSP00000303706,9606.ENSP00000320147,9606.ENSP00000321656,9606.ENSP00000337691,9606.ENSP00000348838,9606.ENSP00000355958,9606.ENSP00000378699,9606.ENSP00000393139,9606.ENSP00000405726,9606.ENSP00000481110	CDC6,DLGAP5,CCNB1,ESPL1,CDCA5,CDT1,BIRC5,MTBP,CDC25A,EZH2,CDC25C,MAPK15,UBE2C,DTL,CDK1,CDC7,CDC45,FAM83D
GO:0000003	Reproduction	76	1403	0.33	1.02e-07	9606.ENSP00000005995,9606.ENSP00000166345,9606.ENSP00000184183,9606.ENSP00000216911,9606.ENSP00000230321,9606.ENSP00000240285,9606.ENSP00000240423,9606.ENSP00000240488,9606.ENSP00000242208,9606.ENSP00000244573,9606.ENSP00000256442,9606.ENSP00000257934,9606.ENSP00000259008,9606.ENSP00000262643,9606.ENSP00000263181,9606.ENSP00000263382,9606.ENSP00000263753,9606.ENSP00000270861,9606.ENSP00000271452,…	PRSS21,TRIP13,ROPN1,AURKA,MDFI,RDH10,NCAPH,MND1,INHBA,HIST1H1A,CCNB1,ESPL1,BRIP1,CCNE1,KIF18A,ASF1B,SGOL1,PLK4,NUF2,ST14,CCT5,BUB1B,SOX8,CCT3,KIAA1524,RPL39L,POC1A,HMGB2,RAD21,PLK1,BUB1,CBX2,CALR,E2F7,NCAPD2,LIN9,CASC5,COL9A3,E2F1,SMC4,SYCP2,HORMAD1,EXO1,NEK2,ASPM,TDRKH,TTK,RAD54L,MMP9,SRPK1,CKS2,PCNA,PRDX4,FOXC1,SDC1,RAD51,SERPINB5,GJB2,FANCA,PTTG1,INCENP,SPP1,CDK1,KIFC1,RACGAP1,CLDN4,TOP2A,SLC2…
GO:0045841	Negative regulation of mitotic metaphase/anaphase transition	11	25	1.24	1.08e-07	9606.ENSP00000166345,9606.ENSP00000287598,9606.ENSP00000296509,9606.ENSP00000297338,9606.ENSP00000300093,9606.ENSP00000301633,9606.ENSP00000302530,9606.ENSP00000313950,9606.ENSP00000355922,9606.ENSP00000358813,9606.ENSP00000361540	TRIP13,BUB1B,MAD2L1,RAD21,PLK1,BIRC5,BUB1,AURKB,CENPF,TTK,CDC20
GO:0045132	Meiotic chromosome segregation	17	87	0.89	1.1e-07	9606.ENSP00000166345,9606.ENSP00000240423,9606.ENSP00000257934,9606.ENSP00000259008,9606.ENSP00000262643,9606.ENSP00000263753,9606.ENSP00000271452,9606.ENSP00000287598,9606.ENSP00000300093,9606.ENSP00000302530,9606.ENSP00000349961,9606.ENSP00000350162,9606.ENSP00000355167,9606.ENSP00000358813,9606.ENSP00000377536,9606.ENSP00000411532,9606.ENSP00000429089	TRIP13,NCAPH,ESPL1,BRIP1,CCNE1,SGOL1,NUF2,BUB1B,PLK1,BUB1,SMC4,SYCP2,HORMAD1,TTK,PTTG1,TOP2A,CCNE2
GO:0051225	Spindle assembly	17	88	0.89	1.27e-07	9606.ENSP00000216911,9606.ENSP00000217026,9606.ENSP00000260363,9606.ENSP00000260731,9606.ENSP00000300403,9606.ENSP00000301633,9606.ENSP00000313950,9606.ENSP00000355966,9606.ENSP00000356379,9606.ENSP00000357308,9606.ENSP00000361540,9606.ENSP00000362937,9606.ENSP00000363524,9606.ENSP00000377793,9606.ENSP00000378295,9606.ENSP00000393963,9606.ENSP00000404190	AURKA,MYBL2,KIF23,KIF11,TPX2,BIRC5,AURKB,NEK2,ASPM,CENPW,CDC20,RCC1,KIF4A,PRC1,INCENP,KIFC1,RACGAP1
GO:0022414	Reproductive process	75	1400	0.33	2.05e-07	9606.ENSP00000005995,9606.ENSP00000166345,9606.ENSP00000184183,9606.ENSP00000216911,9606.ENSP00000230321,9606.ENSP00000240285,9606.ENSP00000240423,9606.ENSP00000240488,9606.ENSP00000242208,9606.ENSP00000244573,9606.ENSP00000256442,9606.ENSP00000257934,9606.ENSP00000259008,9606.ENSP00000262643,9606.ENSP00000263181,9606.ENSP00000263382,9606.ENSP00000263753,9606.ENSP00000270861,9606.ENSP00000271452,…	PRSS21,TRIP13,ROPN1,AURKA,MDFI,RDH10,NCAPH,MND1,INHBA,HIST1H1A,CCNB1,ESPL1,BRIP1,CCNE1,KIF18A,ASF1B,SGOL1,PLK4,NUF2,ST14,CCT5,BUB1B,SOX8,CCT3,KIAA1524,RPL39L,POC1A,HMGB2,RAD21,PLK1,BUB1,CBX2,CALR,E2F7,NCAPD2,CASC5,COL9A3,E2F1,SMC4,SYCP2,HORMAD1,EXO1,NEK2,ASPM,TDRKH,TTK,RAD54L,MMP9,SRPK1,CKS2,PCNA,PRDX4,FOXC1,SDC1,RAD51,SERPINB5,GJB2,FANCA,PTTG1,INCENP,SPP1,CDK1,KIFC1,RACGAP1,CLDN4,TOP2A,SLC2A1,RO…
GO:0006302	Double-strand break repair	24	204	0.67	3.87e-07	9606.ENSP00000166345,9606.ENSP00000216122,9606.ENSP00000228843,9606.ENSP00000259008,9606.ENSP00000262105,9606.ENSP00000264233,9606.ENSP00000265056,9606.ENSP00000275517,9606.ENSP00000297338,9606.ENSP00000305480,9606.ENSP00000307288,9606.ENSP00000318977,9606.ENSP00000347168,9606.ENSP00000347232,9606.ENSP00000361043,9606.ENSP00000366956,9606.ENSP00000367034,9606.ENSP00000372088,9606.ENSP00000386239,…	TRIP13,MCM5,RAD51AP1,BRIP1,MCM4,POLQ,MCM2,CDCA5,RAD21,FEN1,MCM7,GEN1,HIST1H4J,BLM,RAD54L,HIST1H4H,HIST1H4C,RAD51,TONSL,CDC7,CDC45,H2AFX,MCM3,RECQL4
GO:0007010	Cytoskeleton organization	64	1126	0.35	4.57e-07	9606.ENSP00000216911,9606.ENSP00000217026,9606.ENSP00000229239,9606.ENSP00000252252,9606.ENSP00000256442,9606.ENSP00000257934,9606.ENSP00000260363,9606.ENSP00000260731,9606.ENSP00000261597,9606.ENSP00000263181,9606.ENSP00000263753,9606.ENSP00000263867,9606.ENSP00000263946,9606.ENSP00000265148,9606.ENSP00000265748,9606.ENSP00000270861,9606.ENSP00000271452,9606.ENSP00000296484,9606.ENSP00000296509,…	AURKA,MYBL2,GAPDH,KRT6B,CCNB1,ESPL1,KIF23,KIF11,NDC80,KIF18A,SGOL1,CAPG,PKP1,CENPE,ANLN,PLK4,NUF2,POC1A,MAD2L1,KIAA0101,PLK1,TPX2,TUBA1C,BIRC5,KRT16,AURKB,CALR,SPAG5,TACC3,CENPA,NEK2,ASPM,CENPW,TTK,PSRC1,STIL,KIF2C,CDC20,RCC1,KIF4A,ACTL8,DSP,CALML5,FAM83H,TTLL4,CIT,PRC1,INCENP,KIF20A,CDK1,DIAPH3,WDR62,GPSM2,SAPCD2,KIFC1,RACGAP1,STMN1,SPTBN2,GAS2L3,ENSG00000258947,NUSAP1,KIF18B,MYH14,ENSG000001581…
GO:0034622	Cellular protein-containing complex assembly	52	816	0.4	4.65e-07	9606.ENSP00000216122,9606.ENSP00000244534,9606.ENSP00000244573,9606.ENSP00000262105,9606.ENSP00000263382,9606.ENSP00000264552,9606.ENSP00000265056,9606.ENSP00000265148,9606.ENSP00000265748,9606.ENSP00000276689,9606.ENSP00000281453,9606.ENSP00000289316,9606.ENSP00000296503,9606.ENSP00000300403,9606.ENSP00000301019,9606.ENSP00000307288,9606.ENSP00000307705,9606.ENSP00000320866,9606.ENSP00000321744,…	MCM5,HIST1H1D,HIST1H1A,MCM4,ASF1B,UBE2S,MCM2,CENPE,ANLN,NDUFB9,CENPU,HIST1H2BD,HMGB2,TPX2,CDT1,MCM7,HIST1H1E,CALR,HIST1H2BC,HIST1H1B,HIST2H3D,CASC5,CENPA,HIST1H1C,HIST1H4J,UBE2C,HIST1H2BK,HIST1H3J,COA6,CENPF,CENPW,HIST2H2BE,HIST2H3C,SRPK1,HIST1H2BL,HIST1H4H,HIST1H3D,HIST1H4C,RAD51,CENPN,HELLS,DIAPH3,HIST2H3A,CDC45,HJURP,H2AFX,HIST2H2BF,LSM4,HIST1H2BJ,HIST3H2BB,MCM3,HIST1H2BN
GO:0007127	Meiosis i	18	112	0.81	5.14e-07	9606.ENSP00000166345,9606.ENSP00000216911,9606.ENSP00000240488,9606.ENSP00000257934,9606.ENSP00000259008,9606.ENSP00000262643,9606.ENSP00000263753,9606.ENSP00000297338,9606.ENSP00000300093,9606.ENSP00000350162,9606.ENSP00000355167,9606.ENSP00000361043,9606.ENSP00000364976,9606.ENSP00000372088,9606.ENSP00000377536,9606.ENSP00000411532,9606.ENSP00000429089,9606.ENSP00000429633	TRIP13,AURKA,MND1,ESPL1,BRIP1,CCNE1,SGOL1,RAD21,PLK1,SYCP2,HORMAD1,RAD54L,CKS2,RAD51,PTTG1,TOP2A,CCNE2,MYBL1
GO:0007094	Mitotic spindle assembly checkpoint	10	23	1.24	6.57e-07	9606.ENSP00000166345,9606.ENSP00000287598,9606.ENSP00000296509,9606.ENSP00000300093,9606.ENSP00000301633,9606.ENSP00000302530,9606.ENSP00000313950,9606.ENSP00000355922,9606.ENSP00000358813,9606.ENSP00000361540	TRIP13,BUB1B,MAD2L1,PLK1,BIRC5,BUB1,AURKB,CENPF,TTK,CDC20
GO:0006270	DNA replication initiation	11	32	1.14	7.73e-07	9606.ENSP00000209728,9606.ENSP00000216122,9606.ENSP00000219097,9606.ENSP00000262105,9606.ENSP00000262643,9606.ENSP00000265056,9606.ENSP00000307288,9606.ENSP00000405726,9606.ENSP00000418268,9606.ENSP00000429089,9606.ENSP00000480987	CDC6,MCM5,ORC6,MCM4,CCNE1,MCM2,MCM7,CDC45,MCM10,CCNE2,MCM3
GO:0000724	Double-strand break repair via homologous recombination	17	102	0.82	8.15e-07	9606.ENSP00000216122,9606.ENSP00000228843,9606.ENSP00000262105,9606.ENSP00000264233,9606.ENSP00000265056,9606.ENSP00000305480,9606.ENSP00000307288,9606.ENSP00000318977,9606.ENSP00000347232,9606.ENSP00000361043,9606.ENSP00000372088,9606.ENSP00000386239,9606.ENSP00000393139,9606.ENSP00000405726,9606.ENSP00000434024,9606.ENSP00000480987,9606.ENSP00000482313	MCM5,RAD51AP1,MCM4,POLQ,MCM2,FEN1,MCM7,GEN1,BLM,RAD54L,RAD51,TONSL,CDC7,CDC45,H2AFX,MCM3,RECQL4
GO:0048523	Negative regulation of cellular process	181	4874	0.17	8.55e-07	9606.ENSP00000166345,9606.ENSP00000209728,9606.ENSP00000215743,9606.ENSP00000215754,9606.ENSP00000216127,9606.ENSP00000216911,9606.ENSP00000218230,9606.ENSP00000219097,9606.ENSP00000220751,9606.ENSP00000229239,9606.ENSP00000230321,9606.ENSP00000234392,9606.ENSP00000242208,9606.ENSP00000244534,9606.ENSP00000244573,9606.ENSP00000244745,9606.ENSP00000246515,9606.ENSP00000256412,9606.ENSP00000256442,…	TRIP13,CDC6,MMP11,MIF,RASD2,AURKA,PCSK1N,ORC6,RIPK2,GAPDH,MDFI,VAX2,INHBA,HIST1H1D,HIST1H1A,SOX4,SLURP1,ADAMDEC1,CCNB1,ESPL1,IGF2BP3,BRIP1,PKMYT1,CCNE1,BPI,EPCAM,CAPG,PKP1,POLQ,CD80,MCM2,PITX1,GAL,BCL2A1,S100A11,SAMSN1,ATAD2,BUB1B,SLAMF8,CSTB,S100A1,SOX8,EN1,H2AFZ,HMGB2,MAD2L1,CHMP4C,RAD21,A2ML1,PLK1,TPX2,NOD2,CDT1,BIRC5,KRT16,BUB1,MTBP,CXCL10,CST1,CXCL8,MRPL13,HIST1H1E,CBX2,PPP1R14B,RMI2,TRIM59,…
GO:0032465	Regulation of cytokinesis	16	89	0.85	8.71e-07	9606.ENSP00000209728,9606.ENSP00000216911,9606.ENSP00000260363,9606.ENSP00000270861,9606.ENSP00000297265,9606.ENSP00000300093,9606.ENSP00000313950,9606.ENSP00000323246,9606.ENSP00000356319,9606.ENSP00000376306,9606.ENSP00000376753,9606.ENSP00000377793,9606.ENSP00000378295,9606.ENSP00000378356,9606.ENSP00000404190,9606.ENSP00000481103	CDC6,AURKA,KIF23,PLK4,CHMP4C,PLK1,AURKB,E2F7,KIF14,CIT,GIPC1,PRC1,INCENP,KIF20A,RACGAP1,E2F8
GO:0045814	Negative regulation of gene expression, epigenetic	17	103	0.82	9.04e-07	9606.ENSP00000296417,9606.ENSP00000320147,9606.ENSP00000332790,9606.ENSP00000333277,9606.ENSP00000341094,9606.ENSP00000347168,9606.ENSP00000351589,9606.ENSP00000352119,9606.ENSP00000352252,9606.ENSP00000355656,9606.ENSP00000358154,9606.ENSP00000358155,9606.ENSP00000366956,9606.ENSP00000366999,9606.ENSP00000367034,9606.ENSP00000385479,9606.ENSP00000434024	H2AFZ,EZH2,HIST2H2AB,HIST2H3D,HIST1H2AD,HIST1H4J,HIST1H2AI,HIST1H2AG,HIST1H3J,HIST3H2A,HIST2H3C,HIST2H2AA,HIST1H4H,HIST1H3D,HIST1H4C,HIST2H3A,H2AFX
GO:0090307	Mitotic spindle assembly	12	43	1.05	1.05e-06	9606.ENSP00000217026,9606.ENSP00000260363,9606.ENSP00000260731,9606.ENSP00000300403,9606.ENSP00000301633,9606.ENSP00000313950,9606.ENSP00000355966,9606.ENSP00000361540,9606.ENSP00000363524,9606.ENSP00000377793,9606.ENSP00000393963,9606.ENSP00000404190	MYBL2,KIF23,KIF11,TPX2,BIRC5,AURKB,NEK2,CDC20,KIF4A,PRC1,KIFC1,RACGAP1
GO:0006950	Response to stress	140	3485	0.2	1.08e-06	9606.ENSP00000160827,9606.ENSP00000166345,9606.ENSP00000215754,9606.ENSP00000216122,9606.ENSP00000216911,9606.ENSP00000218230,9606.ENSP00000220751,9606.ENSP00000221486,9606.ENSP00000228843,9606.ENSP00000229239,9606.ENSP00000233893,9606.ENSP00000242208,9606.ENSP00000244745,9606.ENSP00000255409,9606.ENSP00000256442,9606.ENSP00000259008,9606.ENSP00000261267,9606.ENSP00000262105,9606.ENSP00000262428,…	KIF22,TRIP13,MIF,MCM5,AURKA,PCSK1N,RIPK2,RNASEH2A,RAD51AP1,GAPDH,HSPE1,INHBA,SOX4,CHI3L1,CCNB1,BRIP1,LYZ,MCM4,COTL1,PRDX1,BPI,POLQ,NEIL3,MCM2,GAL,BCL2A1,CCNA2,CDCA5,GSDMC,DSC2,SLAMF8,AQP5,HMGB2,RAD21,MELK,KIAA0101,PLK1,NOD2,SLC39A4,KRT16,CLEC7A,FEN1,CXCL10,CXCL8,CXCL11,MCM7,PPP1R14B,RMI2,FANCI,TRIM59,CLSPN,EXOSC4,GEN1,EZH2,CALR,CDC25C,HIST1H2BC,DCTPP1,E2F7,PMAIP1,APOBEC3B,PIF1,HIST2H3D,MAPK15,PLA…
GO:0031570	DNA integrity checkpoint	20	151	0.72	1.2e-06	9606.ENSP00000209728,9606.ENSP00000216911,9606.ENSP00000244745,9606.ENSP00000256442,9606.ENSP00000259008,9606.ENSP00000300093,9606.ENSP00000301019,9606.ENSP00000312995,9606.ENSP00000321656,9606.ENSP00000323246,9606.ENSP00000345571,9606.ENSP00000347232,9606.ENSP00000348538,9606.ENSP00000355958,9606.ENSP00000368458,9606.ENSP00000378699,9606.ENSP00000405726,9606.ENSP00000411532,9606.ENSP00000434024,…	CDC6,AURKA,SOX4,CCNB1,BRIP1,PLK1,CDT1,CLSPN,CDC25C,E2F7,E2F1,BLM,RBM38,DTL,PCNA,CDK1,CDC45,TOP2A,H2AFX,E2F8
GO:0051383	Kinetochore organization	9	18	1.3	1.38e-06	9606.ENSP00000261597,9606.ENSP00000265148,9606.ENSP00000271452,9606.ENSP00000301019,9606.ENSP00000336868,9606.ENSP00000349961,9606.ENSP00000355922,9606.ENSP00000357308,9606.ENSP00000377007	NDC80,CENPE,NUF2,CDT1,CENPA,SMC4,CENPF,CENPW,CENPN
GO:0051128	Regulation of cellular component organization	106	2402	0.24	1.39e-06	9606.ENSP00000166345,9606.ENSP00000209728,9606.ENSP00000216911,9606.ENSP00000230431,9606.ENSP00000242208,9606.ENSP00000244534,9606.ENSP00000244573,9606.ENSP00000247191,9606.ENSP00000256442,9606.ENSP00000257934,9606.ENSP00000260731,9606.ENSP00000261597,9606.ENSP00000262300,9606.ENSP00000262428,9606.ENSP00000263181,9606.ENSP00000263867,9606.ENSP00000265056,9606.ENSP00000265148,9606.ENSP00000265748,…	TRIP13,CDC6,AURKA,DNPH1,INHBA,HIST1H1D,HIST1H1A,DLGAP5,CCNB1,ESPL1,KIF11,NDC80,PKMYT1,COTL1,KIF18A,CAPG,MCM2,CENPE,ANLN,PLK4,CDCA5,CCT5,ATAD2,BUB1B,CCT3,POC1A,MAD2L1,CHMP4C,RAD21,PLK1,TPX2,CDT1,BIRC5,BUB1,CLEC7A,MTBP,LRP8,FEN1,CXCL10,HIST1H1E,RMI2,LRFN4,AURKB,EXOSC4,GEN1,SKA3,EZH2,CALR,CDC25C,MMP1,SPAG5,PMAIP1,TACC3,PIF1,HIST1H1B,EPHB3,NME1,MAPK15,BCL11A,PLAUR,HIST1H1C,EIF4EBP1,FOXM1,E2F1,FN1,UBE…
GO:0070192	Chromosome organization involved in meiotic cell cycle	14	68	0.91	1.63e-06	9606.ENSP00000166345,9606.ENSP00000240423,9606.ENSP00000259008,9606.ENSP00000262643,9606.ENSP00000263753,9606.ENSP00000287598,9606.ENSP00000302530,9606.ENSP00000325017,9606.ENSP00000349961,9606.ENSP00000350162,9606.ENSP00000355167,9606.ENSP00000372088,9606.ENSP00000378295,9606.ENSP00000429089	TRIP13,NCAPH,BRIP1,CCNE1,SGOL1,BUB1B,BUB1,NCAPD2,SMC4,SYCP2,HORMAD1,RAD51,INCENP,CCNE2
GO:1901992	Positive regulation of mitotic cell cycle phase transition	15	82	0.86	1.97e-06	9606.ENSP00000209728,9606.ENSP00000247191,9606.ENSP00000256442,9606.ENSP00000257934,9606.ENSP00000275517,9606.ENSP00000301019,9606.ENSP00000301633,9606.ENSP00000303398,9606.ENSP00000303706,9606.ENSP00000321656,9606.ENSP00000348838,9606.ENSP00000355958,9606.ENSP00000378699,9606.ENSP00000393139,9606.ENSP00000405726	CDC6,DLGAP5,CCNB1,ESPL1,CDCA5,CDT1,BIRC5,MTBP,CDC25A,CDC25C,UBE2C,DTL,CDK1,CDC7,CDC45
GO:0044085	Cellular component biogenesis	111	2583	0.23	2.23e-06	9606.ENSP00000166345,9606.ENSP00000215754,9606.ENSP00000216122,9606.ENSP00000216911,9606.ENSP00000217026,9606.ENSP00000244534,9606.ENSP00000244573,9606.ENSP00000256442,9606.ENSP00000259008,9606.ENSP00000260363,9606.ENSP00000260731,9606.ENSP00000262105,9606.ENSP00000263382,9606.ENSP00000263867,9606.ENSP00000263946,9606.ENSP00000264233,9606.ENSP00000264552,9606.ENSP00000265056,9606.ENSP00000265148,…	TRIP13,MIF,MCM5,AURKA,MYBL2,HIST1H1D,HIST1H1A,CCNB1,BRIP1,KIF23,KIF11,MCM4,ASF1B,CAPG,PKP1,POLQ,UBE2S,MCM2,CENPE,ANLN,SQLE,PLK4,NDUFB9,CENPU,HIST1H2BD,AQP5,CCT3,POC1A,HMGB2,CHMP4C,DCAF13,PLK1,TPX2,CDT1,BIRC5,TK1,MCM7,HIST1H1E,AURKB,EXOSC4,CALR,HIST1H2BC,HIST1H1B,HIST2H3D,CDKN3,CASC5,CENPA,HIST1H1C,FN1,HIST1H4J,BLM,UBE2C,HIST1H2BK,SYCP2,HIST1H3J,RRM2,HORMAD1,EXO1,COA6,EPRS,CENPF,NEK2,ASPM,CENPW,HI…
GO:0000079	Regulation of cyclin-dependent protein serine/threonine kinase activity	16	97	0.82	2.35e-06	9606.ENSP00000209728,9606.ENSP00000256442,9606.ENSP00000262300,9606.ENSP00000262643,9606.ENSP00000274026,9606.ENSP00000288207,9606.ENSP00000300093,9606.ENSP00000303706,9606.ENSP00000311083,9606.ENSP00000321656,9606.ENSP00000335357,9606.ENSP00000347232,9606.ENSP00000358925,9606.ENSP00000364976,9606.ENSP00000418915,9606.ENSP00000429089	CDC6,CCNB1,PKMYT1,CCNE1,CCNA2,CCNB2,PLK1,CDC25A,CKS1B,CDC25C,CDKN3,BLM,PSRC1,CKS2,CDKN2A,CCNE2
GO:0032392	DNA geometric change	17	114	0.77	3.17e-06	9606.ENSP00000216122,9606.ENSP00000259008,9606.ENSP00000262105,9606.ENSP00000264233,9606.ENSP00000265056,9606.ENSP00000296503,9606.ENSP00000307288,9606.ENSP00000322180,9606.ENSP00000328174,9606.ENSP00000347232,9606.ENSP00000359393,9606.ENSP00000361043,9606.ENSP00000372088,9606.ENSP00000376272,9606.ENSP00000399888,9606.ENSP00000480987,9606.ENSP00000482313	MCM5,BRIP1,MCM4,POLQ,MCM2,HMGB2,MCM7,DSCC1,PIF1,BLM,HMGB3,RAD54L,RAD51,RFC4,HMGA1,MCM3,RECQL4
GO:0010639	Negative regulation of organelle organization	32	395	0.51	3.36e-06	9606.ENSP00000166345,9606.ENSP00000244534,9606.ENSP00000244573,9606.ENSP00000257934,9606.ENSP00000263867,9606.ENSP00000265056,9606.ENSP00000287394,9606.ENSP00000287598,9606.ENSP00000296509,9606.ENSP00000297338,9606.ENSP00000300093,9606.ENSP00000300403,9606.ENSP00000301633,9606.ENSP00000302530,9606.ENSP00000303398,9606.ENSP00000307705,9606.ENSP00000313950,9606.ENSP00000328174,9606.ENSP00000330074,…	TRIP13,HIST1H1D,HIST1H1A,ESPL1,CAPG,MCM2,ATAD2,BUB1B,MAD2L1,RAD21,PLK1,TPX2,BIRC5,BUB1,MTBP,HIST1H1E,AURKB,PIF1,HIST1H1B,HIST1H1C,HORMAD1,CENPF,NEK2,TTK,CDC20,CKAP2,PTTG1,HMGA1,STMN1,TOP2A,SPTBN2,ENSG00000158164
GO:0034508	Centromere complex assembly	12	52	0.96	5.81e-06	9606.ENSP00000265148,9606.ENSP00000281453,9606.ENSP00000335463,9606.ENSP00000336868,9606.ENSP00000347168,9606.ENSP00000355922,9606.ENSP00000357308,9606.ENSP00000366956,9606.ENSP00000367034,9606.ENSP00000377007,9606.ENSP00000377601,9606.ENSP00000414109	CENPE,CENPU,CASC5,CENPA,HIST1H4J,CENPF,CENPW,HIST1H4H,HIST1H4C,CENPN,HELLS,HJURP
GO:0033260	Nuclear dna replication	11	43	1.01	8.61e-06	9606.ENSP00000216122,9606.ENSP00000262105,9606.ENSP00000265056,9606.ENSP00000301019,9606.ENSP00000305480,9606.ENSP00000307288,9606.ENSP00000368458,9606.ENSP00000372088,9606.ENSP00000376272,9606.ENSP00000405726,9606.ENSP00000480987	MCM5,MCM4,MCM2,CDT1,FEN1,MCM7,PCNA,RAD51,RFC4,CDC45,MCM3
GO:0070507	Regulation of microtubule cytoskeleton organization	21	192	0.64	9.54e-06	9606.ENSP00000216911,9606.ENSP00000260731,9606.ENSP00000263181,9606.ENSP00000270861,9606.ENSP00000296484,9606.ENSP00000297265,9606.ENSP00000300093,9606.ENSP00000300403,9606.ENSP00000318977,9606.ENSP00000319417,9606.ENSP00000323300,9606.ENSP00000326550,9606.ENSP00000337691,9606.ENSP00000355966,9606.ENSP00000358925,9606.ENSP00000360944,9606.ENSP00000362937,9606.ENSP00000367276,9606.ENSP00000385510,…	AURKA,KIF11,KIF18A,PLK4,POC1A,CHMP4C,PLK1,TPX2,GEN1,SKA3,SPAG5,TACC3,MAPK15,NEK2,PSRC1,STIL,RCC1,CKAP2,GPSM2,RANBP1,STMN1
GO:0010389	Regulation of g2/m transition of mitotic cell cycle	21	198	0.63	1.51e-05	9606.ENSP00000209728,9606.ENSP00000216911,9606.ENSP00000256442,9606.ENSP00000270861,9606.ENSP00000297265,9606.ENSP00000297338,9606.ENSP00000300093,9606.ENSP00000300403,9606.ENSP00000303706,9606.ENSP00000312995,9606.ENSP00000313950,9606.ENSP00000321656,9606.ENSP00000347232,9606.ENSP00000355922,9606.ENSP00000355958,9606.ENSP00000355966,9606.ENSP00000356319,9606.ENSP00000377492,9606.ENSP00000378699,…	CDC6,AURKA,CCNB1,PLK4,CHMP4C,RAD21,PLK1,TPX2,CDC25A,CLSPN,AURKB,CDC25C,BLM,CENPF,DTL,NEK2,KIF14,HMMR,CDK1,CDC7,CDKN2A
GO:0000727	Double-strand break repair via break-induced replication	7	11	1.4	1.68e-05	9606.ENSP00000216122,9606.ENSP00000262105,9606.ENSP00000265056,9606.ENSP00000307288,9606.ENSP00000393139,9606.ENSP00000405726,9606.ENSP00000480987	MCM5,MCM4,MCM2,MCM7,CDC7,CDC45,MCM3
GO:0051338	Regulation of transferase activity	56	1036	0.33	1.88e-05	9606.ENSP00000209728,9606.ENSP00000215754,9606.ENSP00000220751,9606.ENSP00000255409,9606.ENSP00000256442,9606.ENSP00000262300,9606.ENSP00000262643,9606.ENSP00000264552,9606.ENSP00000265148,9606.ENSP00000265728,9606.ENSP00000274026,9606.ENSP00000288207,9606.ENSP00000289707,9606.ENSP00000296509,9606.ENSP00000300093,9606.ENSP00000300403,9606.ENSP00000300589,9606.ENSP00000303634,9606.ENSP00000303706,…	CDC6,MIF,RIPK2,CHI3L1,CCNB1,PKMYT1,CCNE1,UBE2S,CENPE,DBF4,CCNA2,CCNB2,SLAMF8,MAD2L1,PLK1,TPX2,NOD2,LRP8,CDC25A,CXCL10,CKS1B,CLSPN,AURKB,EZH2,CDC25C,DSCC1,PIF1,EPHB3,CDKN3,MAPK15,BLM,UBE2C,IQGAP3,KIAA1804,NEK2,KIF14,FCGR1A,PSRC1,IRAK1,LMO4,CDC20,DKK1,MAGED1,CKS2,PCNA,RFC4,MST4,INCENP,CDK1,CXCR4,NCAPG2,CDKN2A,PBK,CCNE2,DBNDD1,VEGFA
GO:0048519	Negative regulation of biological process	189	5389	0.14	2.09e-05	9606.ENSP00000166345,9606.ENSP00000209728,9606.ENSP00000215743,9606.ENSP00000215754,9606.ENSP00000216127,9606.ENSP00000216911,9606.ENSP00000218230,9606.ENSP00000219097,9606.ENSP00000220751,9606.ENSP00000229239,9606.ENSP00000230321,9606.ENSP00000234392,9606.ENSP00000242208,9606.ENSP00000244534,9606.ENSP00000244573,9606.ENSP00000244745,9606.ENSP00000246515,9606.ENSP00000256412,9606.ENSP00000256442,…	TRIP13,CDC6,MMP11,MIF,RASD2,AURKA,PCSK1N,ORC6,RIPK2,GAPDH,MDFI,VAX2,INHBA,HIST1H1D,HIST1H1A,SOX4,SLURP1,ADAMDEC1,CCNB1,ESPL1,IGF2BP3,BRIP1,PKMYT1,CCNE1,BPI,EPCAM,CAPG,PKP1,POLQ,CD80,MCM2,PITX1,GAL,BCL2A1,S100A11,NFKBIE,SAMSN1,ATAD2,BUB1B,SLAMF8,CSTB,S100A1,SOX8,EN1,H2AFZ,HMGB2,MAD2L1,CHMP4C,RAD21,A2ML1,PLK1,TPX2,NOD2,CDT1,BIRC5,KRT16,BUB1,MTBP,CXCL10,CST1,CXCL8,MRPL13,HIST1H1E,CBX2,PPP1R14B,RMI2,…
GO:0031935	Regulation of chromatin silencing	8	19	1.22	2.33e-05	9606.ENSP00000244534,9606.ENSP00000244573,9606.ENSP00000287394,9606.ENSP00000307705,9606.ENSP00000330074,9606.ENSP00000339566,9606.ENSP00000399888,9606.ENSP00000405726	HIST1H1D,HIST1H1A,ATAD2,HIST1H1E,HIST1H1B,HIST1H1C,HMGA1,CDC45
GO:0050794	Regulation of cellular process	331	10932	0.08	2.75e-05	9606.ENSP00000166345,9606.ENSP00000184183,9606.ENSP00000209728,9606.ENSP00000215743,9606.ENSP00000215754,9606.ENSP00000216127,9606.ENSP00000216911,9606.ENSP00000217026,9606.ENSP00000218230,9606.ENSP00000219097,9606.ENSP00000220751,9606.ENSP00000222598,9606.ENSP00000228843,9606.ENSP00000229239,9606.ENSP00000230321,9606.ENSP00000230431,9606.ENSP00000233893,9606.ENSP00000234392,9606.ENSP00000240285,…	TRIP13,ROPN1,CDC6,MMP11,MIF,RASD2,AURKA,MYBL2,PCSK1N,ORC6,RIPK2,DLX5,RAD51AP1,GAPDH,MDFI,DNPH1,HSPE1,VAX2,RDH10,INHBA,HIST1H1D,HIST1H1A,SOX4,SLURP1,DLGAP5,CHRM3,CHI3L1,ADAMDEC1,CCNB1,ESPL1,IGF2BP3,BRIP1,KIF23,KIF11,LMNB1,NDC80,PKMYT1,IL12RB2,COTL1,CCNE1,PRDX1,BPI,KIF18A,EPCAM,CAPG,PKP1,POLQ,CD80,UBE2S,MCM2,CENPE,PITX1,GAL,DBF4,ANLN,SQLE,BCL2A1,IMPA2,PLK4,S100A11,ATP6V1C2,CCNA2,NFKBIE,CDCA5,CCT5,D…
GO:0072395	Signal transduction involved in cell cycle checkpoint	13	76	0.83	3.22e-05	9606.ENSP00000216911,9606.ENSP00000244745,9606.ENSP00000256442,9606.ENSP00000300093,9606.ENSP00000321656,9606.ENSP00000322568,9606.ENSP00000323246,9606.ENSP00000345571,9606.ENSP00000348538,9606.ENSP00000355958,9606.ENSP00000368458,9606.ENSP00000378699,9606.ENSP00000481103	AURKA,SOX4,CCNB1,PLK1,CDC25C,SOX11,E2F7,E2F1,RBM38,DTL,PCNA,CDK1,E2F8
GO:0008608	Attachment of spindle microtubules to kinetochore	8	21	1.18	4.22e-05	9606.ENSP00000261597,9606.ENSP00000263753,9606.ENSP00000265148,9606.ENSP00000271452,9606.ENSP00000301019,9606.ENSP00000313950,9606.ENSP00000335463,9606.ENSP00000361298	NDC80,SGOL1,CENPE,NUF2,CDT1,AURKB,CASC5,KIF2C
GO:0031936	Negative regulation of chromatin silencing	7	14	1.3	5.45e-05	9606.ENSP00000244534,9606.ENSP00000244573,9606.ENSP00000287394,9606.ENSP00000307705,9606.ENSP00000330074,9606.ENSP00000339566,9606.ENSP00000399888	HIST1H1D,HIST1H1A,ATAD2,HIST1H1E,HIST1H1B,HIST1H1C,HMGA1
GO:0007062	Sister chromatid cohesion	10	42	0.98	5.53e-05	9606.ENSP00000160827,9606.ENSP00000263753,9606.ENSP00000275517,9606.ENSP00000287598,9606.ENSP00000297338,9606.ENSP00000300093,9606.ENSP00000302530,9606.ENSP00000322180,9606.ENSP00000355167,9606.ENSP00000361540	KIF22,SGOL1,CDCA5,BUB1B,RAD21,PLK1,BUB1,DSCC1,HORMAD1,CDC20
GO:0051656	Establishment of organelle localization	29	385	0.48	5.6e-05	9606.ENSP00000160827,9606.ENSP00000247191,9606.ENSP00000256442,9606.ENSP00000257934,9606.ENSP00000260363,9606.ENSP00000261597,9606.ENSP00000263181,9606.ENSP00000265148,9606.ENSP00000271452,9606.ENSP00000275517,9606.ENSP00000296509,9606.ENSP00000297265,9606.ENSP00000300093,9606.ENSP00000301019,9606.ENSP00000301633,9606.ENSP00000336868,9606.ENSP00000355922,9606.ENSP00000356319,9606.ENSP00000358925,…	KIF22,DLGAP5,CCNB1,ESPL1,KIF23,NDC80,KIF18A,CENPE,NUF2,CDCA5,MAD2L1,CHMP4C,PLK1,CDT1,BIRC5,CENPA,CENPF,KIF14,PSRC1,KIF2C,CDCA8,INCENP,GPSM2,SAPCD2,KIFC1,KIF1A,NUSAP1,CCDC64B,FAM83D
GO:0043170	Macromolecule metabolic process	207	6137	0.13	6.27e-05	9606.ENSP00000005286,9606.ENSP00000005995,9606.ENSP00000160827,9606.ENSP00000166345,9606.ENSP00000209728,9606.ENSP00000215743,9606.ENSP00000216122,9606.ENSP00000216911,9606.ENSP00000218230,9606.ENSP00000219097,9606.ENSP00000220751,9606.ENSP00000221486,9606.ENSP00000228843,9606.ENSP00000229239,9606.ENSP00000240488,9606.ENSP00000242208,9606.ENSP00000242776,9606.ENSP00000244534,9606.ENSP00000255380,…	TMEM132A,PRSS21,KIF22,TRIP13,CDC6,MMP11,MCM5,AURKA,PCSK1N,ORC6,RIPK2,RNASEH2A,RAD51AP1,GAPDH,MND1,INHBA,DDX39A,HIST1H1D,CHRM3,CHI3L1,ADAMDEC1,CCNB1,ESPL1,IGF2BP3,BRIP1,MRPL15,GGH,MMP13,LYZ,MCM4,PKMYT1,IL12RB2,CCNE1,POLQ,UBE2S,NEIL3,MCM2,DBF4,PLK4,CCNA2,CDCA5,ST14,BUB1B,HIST1H2BD,TMPRSS3,PRSS33,RPL39L,HMGB2,MAD2L1,CHMP4C,RAD21,DCAF13,MELK,TMPRSS5,KIAA0101,PLK1,NOD2,CDT1,BIRC5,TK1,BUB1,LRP8,CDC25A,…
GO:0006268	DNA unwinding involved in DNA replication	7	15	1.27	7.61e-05	9606.ENSP00000262105,9606.ENSP00000265056,9606.ENSP00000307288,9606.ENSP00000347232,9606.ENSP00000372088,9606.ENSP00000399888,9606.ENSP00000482313	MCM4,MCM2,MCM7,BLM,RAD51,HMGA1,RECQL4
GO:0051984	Positive regulation of chromosome segregation	9	33	1.04	7.72e-05	9606.ENSP00000209728,9606.ENSP00000247191,9606.ENSP00000256442,9606.ENSP00000257934,9606.ENSP00000297338,9606.ENSP00000301019,9606.ENSP00000305480,9606.ENSP00000313950,9606.ENSP00000337691	CDC6,DLGAP5,CCNB1,ESPL1,RAD21,CDT1,FEN1,AURKB,MAPK15
GO:0051129	Negative regulation of cellular component organization	42	713	0.37	8.72e-05	9606.ENSP00000166345,9606.ENSP00000244534,9606.ENSP00000244573,9606.ENSP00000257934,9606.ENSP00000263867,9606.ENSP00000265056,9606.ENSP00000287394,9606.ENSP00000287598,9606.ENSP00000296509,9606.ENSP00000297338,9606.ENSP00000300093,9606.ENSP00000300403,9606.ENSP00000301633,9606.ENSP00000302530,9606.ENSP00000303398,9606.ENSP00000305651,9606.ENSP00000307705,9606.ENSP00000313950,9606.ENSP00000328174,…	TRIP13,HIST1H1D,HIST1H1A,ESPL1,CAPG,MCM2,ATAD2,BUB1B,MAD2L1,RAD21,PLK1,TPX2,BIRC5,BUB1,MTBP,CXCL10,HIST1H1E,AURKB,PIF1,HIST1H1B,BCL11A,HIST1H1C,EIF4EBP1,HORMAD1,CENPF,NEK2,KIF14,TTK,LMO4,CDC20,DKK1,CKAP2,PTTG1,SPP1,HMGA1,STMN1,TOP2A,SPTBN2,APOC1,APOC2,ENSG00000158164,VEGFA
GO:0006338	Chromatin remodeling	20	206	0.59	9.79e-05	9606.ENSP00000281453,9606.ENSP00000296503,9606.ENSP00000333277,9606.ENSP00000335463,9606.ENSP00000336868,9606.ENSP00000347168,9606.ENSP00000352252,9606.ENSP00000357308,9606.ENSP00000358154,9606.ENSP00000359393,9606.ENSP00000366956,9606.ENSP00000366999,9606.ENSP00000367034,9606.ENSP00000377007,9606.ENSP00000377601,9606.ENSP00000385479,9606.ENSP00000399888,9606.ENSP00000414109,9606.ENSP00000418915,…	CENPU,HMGB2,HIST2H3D,CASC5,CENPA,HIST1H4J,HIST1H3J,CENPW,HIST2H3C,HMGB3,HIST1H4H,HIST1H3D,HIST1H4C,CENPN,HELLS,HIST2H3A,HMGA1,HJURP,CDKN2A,ANP32E
GO:0031507	Heterochromatin assembly	11	58	0.88	0.0001	9606.ENSP00000333277,9606.ENSP00000347168,9606.ENSP00000352252,9606.ENSP00000358154,9606.ENSP00000366956,9606.ENSP00000366999,9606.ENSP00000367034,9606.ENSP00000377601,9606.ENSP00000385479,9606.ENSP00000399888,9606.ENSP00000418915	HIST2H3D,HIST1H4J,HIST1H3J,HIST2H3C,HIST1H4H,HIST1H3D,HIST1H4C,HELLS,HIST2H3A,HMGA1,CDKN2A
GO:0044260	Cellular macromolecule metabolic process	174	4976	0.14	0.0001	9606.ENSP00000005286,9606.ENSP00000160827,9606.ENSP00000166345,9606.ENSP00000209728,9606.ENSP00000216122,9606.ENSP00000216911,9606.ENSP00000219097,9606.ENSP00000220751,9606.ENSP00000221486,9606.ENSP00000228843,9606.ENSP00000229239,9606.ENSP00000240488,9606.ENSP00000242208,9606.ENSP00000244534,9606.ENSP00000255380,9606.ENSP00000256442,9606.ENSP00000258729,9606.ENSP00000259008,9606.ENSP00000260102,…	TMEM132A,KIF22,TRIP13,CDC6,MCM5,AURKA,ORC6,RIPK2,RNASEH2A,RAD51AP1,GAPDH,MND1,INHBA,HIST1H1D,CHRM3,CCNB1,IGF2BP3,BRIP1,MRPL15,MMP13,LYZ,MCM4,PKMYT1,IL12RB2,CCNE1,POLQ,UBE2S,NEIL3,MCM2,DBF4,PLK4,CCNA2,CDCA5,BUB1B,HIST1H2BD,RPL39L,HMGB2,MAD2L1,CHMP4C,RAD21,DCAF13,MELK,KIAA0101,PLK1,NOD2,CDT1,BIRC5,TK1,BUB1,CDC25A,FEN1,CXCL8,MRPL13,MCM7,HIST1H1E,RMI2,FANCI,TRIM59,CLSPN,MKRN3,AURKB,EXOSC4,TYMS,GEN1,E…
GO:0000083	Regulation of transcription involved in g1/s transition of mitotic cell cycle	9	35	1.01	0.00011	9606.ENSP00000209728,9606.ENSP00000262643,9606.ENSP00000301019,9606.ENSP00000315644,9606.ENSP00000323246,9606.ENSP00000345571,9606.ENSP00000353770,9606.ENSP00000368458,9606.ENSP00000405726	CDC6,CCNE1,CDT1,TYMS,E2F7,E2F1,RRM2,PCNA,CDC45
GO:0060968	Regulation of gene silencing	16	137	0.67	0.00013	9606.ENSP00000244534,9606.ENSP00000244573,9606.ENSP00000287394,9606.ENSP00000307705,9606.ENSP00000330074,9606.ENSP00000333277,9606.ENSP00000339566,9606.ENSP00000347168,9606.ENSP00000352252,9606.ENSP00000358154,9606.ENSP00000366956,9606.ENSP00000366999,9606.ENSP00000367034,9606.ENSP00000385479,9606.ENSP00000399888,9606.ENSP00000405726	HIST1H1D,HIST1H1A,ATAD2,HIST1H1E,HIST1H1B,HIST2H3D,HIST1H1C,HIST1H4J,HIST1H3J,HIST2H3C,HIST1H4H,HIST1H3D,HIST1H4C,HIST2H3A,HMGA1,CDC45
GO:0051782	Negative regulation of cell division	7	17	1.21	0.00014	9606.ENSP00000219097,9606.ENSP00000297265,9606.ENSP00000313950,9606.ENSP00000323246,9606.ENSP00000347232,9606.ENSP00000356379,9606.ENSP00000481103	ORC6,CHMP4C,AURKB,E2F7,BLM,ASPM,E2F8
GO:0031055	Chromatin remodeling at centromere	10	48	0.92	0.00015	9606.ENSP00000281453,9606.ENSP00000335463,9606.ENSP00000336868,9606.ENSP00000347168,9606.ENSP00000357308,9606.ENSP00000366956,9606.ENSP00000367034,9606.ENSP00000377007,9606.ENSP00000377601,9606.ENSP00000414109	CENPU,CASC5,CENPA,HIST1H4J,CENPW,HIST1H4H,HIST1H4C,CENPN,HELLS,HJURP
GO:0051347	Positive regulation of transferase activity	41	705	0.36	0.00015	9606.ENSP00000209728,9606.ENSP00000215754,9606.ENSP00000220751,9606.ENSP00000255409,9606.ENSP00000256442,9606.ENSP00000264552,9606.ENSP00000265148,9606.ENSP00000265728,9606.ENSP00000300093,9606.ENSP00000300403,9606.ENSP00000300589,9606.ENSP00000303634,9606.ENSP00000311083,9606.ENSP00000312995,9606.ENSP00000313950,9606.ENSP00000320147,9606.ENSP00000322180,9606.ENSP00000332118,9606.ENSP00000337691,…	CDC6,MIF,RIPK2,CHI3L1,CCNB1,UBE2S,CENPE,DBF4,PLK1,TPX2,NOD2,LRP8,CKS1B,CLSPN,AURKB,EZH2,DSCC1,EPHB3,MAPK15,UBE2C,IQGAP3,KIAA1804,NEK2,KIF14,FCGR1A,PSRC1,IRAK1,LMO4,CDC20,DKK1,MAGED1,CKS2,PCNA,RFC4,MST4,INCENP,CDK1,CXCR4,NCAPG2,PBK,VEGFA
GO:0072422	Signal transduction involved in dna damage checkpoint	12	75	0.8	0.00015	9606.ENSP00000216911,9606.ENSP00000244745,9606.ENSP00000256442,9606.ENSP00000300093,9606.ENSP00000321656,9606.ENSP00000323246,9606.ENSP00000345571,9606.ENSP00000348538,9606.ENSP00000355958,9606.ENSP00000368458,9606.ENSP00000378699,9606.ENSP00000481103	AURKA,SOX4,CCNB1,PLK1,CDC25C,E2F7,E2F1,RBM38,DTL,PCNA,CDK1,E2F8
GO:0032508	DNA duplex unwinding	14	106	0.72	0.00016	9606.ENSP00000216122,9606.ENSP00000259008,9606.ENSP00000262105,9606.ENSP00000264233,9606.ENSP00000265056,9606.ENSP00000307288,9606.ENSP00000322180,9606.ENSP00000328174,9606.ENSP00000347232,9606.ENSP00000372088,9606.ENSP00000376272,9606.ENSP00000399888,9606.ENSP00000480987,9606.ENSP00000482313	MCM5,BRIP1,MCM4,POLQ,MCM2,MCM7,DSCC1,PIF1,BLM,RAD51,RFC4,HMGA1,MCM3,RECQL4
GO:0000077	DNA damage checkpoint	16	140	0.66	0.00017	9606.ENSP00000216911,9606.ENSP00000244745,9606.ENSP00000256442,9606.ENSP00000259008,9606.ENSP00000300093,9606.ENSP00000312995,9606.ENSP00000321656,9606.ENSP00000323246,9606.ENSP00000345571,9606.ENSP00000347232,9606.ENSP00000348538,9606.ENSP00000355958,9606.ENSP00000368458,9606.ENSP00000378699,9606.ENSP00000434024,9606.ENSP00000481103	AURKA,SOX4,CCNB1,BRIP1,PLK1,CLSPN,CDC25C,E2F7,E2F1,BLM,RBM38,DTL,PCNA,CDK1,H2AFX,E2F8
GO:0042770	Signal transduction in response to dna damage	14	107	0.72	0.00018	9606.ENSP00000215754,9606.ENSP00000216911,9606.ENSP00000244745,9606.ENSP00000256442,9606.ENSP00000300093,9606.ENSP00000321656,9606.ENSP00000323246,9606.ENSP00000342307,9606.ENSP00000345571,9606.ENSP00000348538,9606.ENSP00000355958,9606.ENSP00000368458,9606.ENSP00000378699,9606.ENSP00000481103	MIF,AURKA,SOX4,CCNB1,PLK1,CDC25C,E2F7,FOXM1,E2F1,RBM38,DTL,PCNA,CDK1,E2F8
GO:0002376	Immune system process	100	2481	0.2	0.00019	9606.ENSP00000160827,9606.ENSP00000215754,9606.ENSP00000220751,9606.ENSP00000229239,9606.ENSP00000242208,9606.ENSP00000244745,9606.ENSP00000255409,9606.ENSP00000256412,9606.ENSP00000260118,9606.ENSP00000260363,9606.ENSP00000260731,9606.ENSP00000261267,9606.ENSP00000261622,9606.ENSP00000262428,9606.ENSP00000262746,9606.ENSP00000262865,9606.ENSP00000263181,9606.ENSP00000263735,9606.ENSP00000263946,…	KIF22,MIF,RIPK2,GAPDH,INHBA,SOX4,CHI3L1,ADAMDEC1,GGH,KIF23,KIF11,LYZ,SLC7A5,COTL1,PRDX1,BPI,KIF18A,EPCAM,PKP1,POLQ,CD80,CENPE,ANLN,S100A11,CCNB2,SLAMF8,CSTB,S100P,HMGB2,MELK,NOD2,KRT16,CLEC7A,CXCL10,CXCL8,CXCL11,PPP1R14B,TRIM59,EXOSC4,CALR,HIST1H2BC,MMP1,KIF15,PMAIP1,APOBEC3B,EPHB3,AP1S1,PLAUR,FPR3,IFI6,PODXL2,TAP1,FN1,HIST1H2BK,STAT1,PNP,CXCL9,ILF2,EXO1,EPRS,RGS1,FCGR3A,S100A7,HIST2H2BE,FCGR1A,I…
GO:0032200	Telomere organization	15	125	0.68	0.0002	9606.ENSP00000262643,9606.ENSP00000305480,9606.ENSP00000328174,9606.ENSP00000347168,9606.ENSP00000347232,9606.ENSP00000352252,9606.ENSP00000355506,9606.ENSP00000366956,9606.ENSP00000366999,9606.ENSP00000367034,9606.ENSP00000368458,9606.ENSP00000372088,9606.ENSP00000376272,9606.ENSP00000429089,9606.ENSP00000482313	CCNE1,FEN1,PIF1,HIST1H4J,BLM,HIST1H3J,EXO1,HIST1H4H,HIST1H3D,HIST1H4C,PCNA,RAD51,RFC4,CCNE2,RECQL4
GO:0044774	Mitotic dna integrity checkpoint	14	109	0.71	0.00021	9606.ENSP00000209728,9606.ENSP00000216911,9606.ENSP00000244745,9606.ENSP00000256442,9606.ENSP00000312995,9606.ENSP00000321656,9606.ENSP00000323246,9606.ENSP00000345571,9606.ENSP00000347232,9606.ENSP00000348538,9606.ENSP00000368458,9606.ENSP00000378699,9606.ENSP00000411532,9606.ENSP00000481103	CDC6,AURKA,SOX4,CCNB1,CLSPN,CDC25C,E2F7,E2F1,BLM,RBM38,PCNA,CDK1,TOP2A,E2F8
GO:0071156	Regulation of cell cycle arrest	14	110	0.7	0.00023	9606.ENSP00000215754,9606.ENSP00000216911,9606.ENSP00000244745,9606.ENSP00000256442,9606.ENSP00000320866,9606.ENSP00000321656,9606.ENSP00000323246,9606.ENSP00000342307,9606.ENSP00000345571,9606.ENSP00000348538,9606.ENSP00000368458,9606.ENSP00000378699,9606.ENSP00000418915,9606.ENSP00000481103	MIF,AURKA,SOX4,CCNB1,CALR,CDC25C,E2F7,FOXM1,E2F1,RBM38,PCNA,CDK1,CDKN2A,E2F8
GO:0090224	Regulation of spindle organization	9	39	0.96	0.00023	9606.ENSP00000297265,9606.ENSP00000300093,9606.ENSP00000300403,9606.ENSP00000323300,9606.ENSP00000326550,9606.ENSP00000337691,9606.ENSP00000358925,9606.ENSP00000362937,9606.ENSP00000385510	CHMP4C,PLK1,TPX2,SPAG5,TACC3,MAPK15,PSRC1,RCC1,GPSM2
GO:0042127	Regulation of cell population proliferation	73	1642	0.25	0.00025	9606.ENSP00000209728,9606.ENSP00000215754,9606.ENSP00000220751,9606.ENSP00000222598,9606.ENSP00000242208,9606.ENSP00000244745,9606.ENSP00000246515,9606.ENSP00000256442,9606.ENSP00000259008,9606.ENSP00000262345,9606.ENSP00000262643,9606.ENSP00000263735,9606.ENSP00000264246,9606.ENSP00000265643,9606.ENSP00000265896,9606.ENSP00000271638,9606.ENSP00000274026,9606.ENSP00000293894,9606.ENSP00000295746,…	CDC6,MIF,RIPK2,DLX5,INHBA,SOX4,SLURP1,CCNB1,BRIP1,IL12RB2,CCNE1,EPCAM,CD80,GAL,SQLE,S100A11,CCNA2,SOX8,KIAA1524,HMGB2,NOD2,BIRC5,CLEC7A,MTBP,CXCL10,SHCBP1,CXCL8,CXCL11,CDCA7,EZH2,CALR,SOX11,E2F7,CTHRC1,IDH2,CDKN3,NME1,MAPK15,FOXM1,E2F1,FN1,DHCR7,RBM38,RAB25,STAT1,IQGAP3,PNP,CXCL9,KIF14,ASPM,TTK,IRAK1,MMP9,CDC20,EDN2,PLAU,MARCKSL1,RTKN2,BAMBI,MAGED1,PRDX4,ESM1,SERPINB5,FANCA,PRC1,CDK1,SAPCD2,CDC7,…
GO:0006336	DNA replication-independent nucleosome assembly	10	53	0.88	0.0003	9606.ENSP00000263382,9606.ENSP00000281453,9606.ENSP00000335463,9606.ENSP00000336868,9606.ENSP00000347168,9606.ENSP00000357308,9606.ENSP00000366956,9606.ENSP00000367034,9606.ENSP00000377007,9606.ENSP00000414109	ASF1B,CENPU,CASC5,CENPA,HIST1H4J,CENPW,HIST1H4H,HIST1H4C,CENPN,HJURP
GO:0008284	Positive regulation of cell population proliferation	48	919	0.32	0.00031	9606.ENSP00000209728,9606.ENSP00000215754,9606.ENSP00000220751,9606.ENSP00000222598,9606.ENSP00000244745,9606.ENSP00000256442,9606.ENSP00000262345,9606.ENSP00000262643,9606.ENSP00000263735,9606.ENSP00000264246,9606.ENSP00000274026,9606.ENSP00000293894,9606.ENSP00000295746,9606.ENSP00000296503,9606.ENSP00000300589,9606.ENSP00000301633,9606.ENSP00000302569,9606.ENSP00000305651,9606.ENSP00000320147,…	CDC6,MIF,RIPK2,DLX5,SOX4,CCNB1,IL12RB2,CCNE1,EPCAM,CD80,CCNA2,SOX8,KIAA1524,HMGB2,NOD2,BIRC5,CLEC7A,CXCL10,EZH2,CALR,SOX11,CTHRC1,NME1,MAPK15,FOXM1,E2F1,FN1,RAB25,STAT1,IQGAP3,PNP,KIF14,ASPM,TTK,IRAK1,MMP9,CDC20,EDN2,MARCKSL1,RTKN2,BAMBI,ESM1,PRC1,CDK1,SAPCD2,CDC7,PRAME,VEGFA
GO:0051255	Spindle midzone assembly	6	12	1.3	0.00031	9606.ENSP00000260363,9606.ENSP00000313950,9606.ENSP00000363524,9606.ENSP00000377793,9606.ENSP00000378295,9606.ENSP00000404190	KIF23,AURKB,KIF4A,PRC1,INCENP,RACGAP1
GO:0030330	DNA damage response, signal transduction by p53 class mediator	12	82	0.76	0.00033	9606.ENSP00000215754,9606.ENSP00000216911,9606.ENSP00000244745,9606.ENSP00000256442,9606.ENSP00000321656,9606.ENSP00000323246,9606.ENSP00000342307,9606.ENSP00000345571,9606.ENSP00000348538,9606.ENSP00000368458,9606.ENSP00000378699,9606.ENSP00000481103	MIF,AURKA,SOX4,CCNB1,CDC25C,E2F7,FOXM1,E2F1,RBM38,PCNA,CDK1,E2F8
GO:0050789	Regulation of biological process	338	11475	0.07	0.00035	9606.ENSP00000166345,9606.ENSP00000184183,9606.ENSP00000209728,9606.ENSP00000215743,9606.ENSP00000215754,9606.ENSP00000216127,9606.ENSP00000216911,9606.ENSP00000217026,9606.ENSP00000218230,9606.ENSP00000219097,9606.ENSP00000220751,9606.ENSP00000222598,9606.ENSP00000228843,9606.ENSP00000229239,9606.ENSP00000230321,9606.ENSP00000230431,9606.ENSP00000233893,9606.ENSP00000234392,9606.ENSP00000240285,…	TRIP13,ROPN1,CDC6,MMP11,MIF,RASD2,AURKA,MYBL2,PCSK1N,ORC6,RIPK2,DLX5,RAD51AP1,GAPDH,MDFI,DNPH1,HSPE1,VAX2,RDH10,INHBA,HIST1H1D,HIST1H1A,SOX4,SLURP1,DLGAP5,CHRM3,CHI3L1,ADAMDEC1,CCNB1,ESPL1,IGF2BP3,BRIP1,KIF23,KIF11,LMNB1,NDC80,PKMYT1,IL12RB2,COTL1,CCNE1,PRDX1,BPI,KIF18A,EPCAM,CAPG,PKP1,POLQ,CD80,UBE2S,MCM2,CENPE,PITX1,GAL,DBF4,ANLN,SQLE,BCL2A1,IMPA2,PLK4,S100A11,ATP6V1C2,CCNA2,NFKBIE,CDCA5,CCT5,D…
GO:0034080	CENP-A containing nucleosome assembly	9	43	0.92	0.00043	9606.ENSP00000281453,9606.ENSP00000335463,9606.ENSP00000336868,9606.ENSP00000347168,9606.ENSP00000357308,9606.ENSP00000366956,9606.ENSP00000367034,9606.ENSP00000377007,9606.ENSP00000414109	CENPU,CASC5,CENPA,HIST1H4J,CENPW,HIST1H4H,HIST1H4C,CENPN,HJURP
GO:0006807	Nitrogen compound metabolic process	221	6852	0.11	0.00048	9606.ENSP00000005286,9606.ENSP00000005995,9606.ENSP00000160827,9606.ENSP00000166345,9606.ENSP00000209728,9606.ENSP00000215743,9606.ENSP00000216122,9606.ENSP00000216911,9606.ENSP00000218230,9606.ENSP00000219097,9606.ENSP00000220751,9606.ENSP00000221486,9606.ENSP00000228843,9606.ENSP00000229239,9606.ENSP00000229270,9606.ENSP00000230431,9606.ENSP00000240488,9606.ENSP00000242208,9606.ENSP00000242776,…	TMEM132A,PRSS21,KIF22,TRIP13,CDC6,MMP11,MCM5,AURKA,PCSK1N,ORC6,RIPK2,RNASEH2A,RAD51AP1,GAPDH,TPI1,DNPH1,MND1,INHBA,DDX39A,HIST1H1D,CHRM3,CHI3L1,ADAMDEC1,CCNB1,ESPL1,IGF2BP3,BRIP1,MRPL15,GGH,MMP13,LYZ,MCM4,PKMYT1,IL12RB2,CCNE1,POLQ,UBE2S,NEIL3,HRASLS,MCM2,PLK4,CCNA2,CDCA5,ST14,BUB1B,HIST1H2BD,TMPRSS3,PRSS33,RPL39L,HMGB2,MAD2L1,CHMP4C,RAD21,DCAF13,MELK,TMPRSS5,KIAA0101,PLK1,NOD2,BIRC5,TK1,BUB1,LRP8…
GO:0051785	Positive regulation of nuclear division	11	71	0.79	0.00049	9606.ENSP00000216911,9606.ENSP00000247191,9606.ENSP00000257934,9606.ENSP00000275517,9606.ENSP00000301019,9606.ENSP00000301633,9606.ENSP00000313950,9606.ENSP00000337691,9606.ENSP00000348838,9606.ENSP00000401564,9606.ENSP00000453403	AURKA,DLGAP5,ESPL1,CDCA5,CDT1,BIRC5,AURKB,MAPK15,UBE2C,RANBP1,NUSAP1
GO:1902806	Regulation of cell cycle g1/s phase transition	17	175	0.59	0.00053	9606.ENSP00000209728,9606.ENSP00000216911,9606.ENSP00000244745,9606.ENSP00000256442,9606.ENSP00000303398,9606.ENSP00000320147,9606.ENSP00000321656,9606.ENSP00000323246,9606.ENSP00000345571,9606.ENSP00000348538,9606.ENSP00000356319,9606.ENSP00000368458,9606.ENSP00000378699,9606.ENSP00000405726,9606.ENSP00000418915,9606.ENSP00000481103,9606.ENSP00000481110	CDC6,AURKA,SOX4,CCNB1,MTBP,EZH2,CDC25C,E2F7,E2F1,RBM38,KIF14,PCNA,CDK1,CDC45,CDKN2A,E2F8,FAM83D
GO:2000045	Regulation of g1/s transition of mitotic cell cycle	16	156	0.61	0.00053	9606.ENSP00000209728,9606.ENSP00000216911,9606.ENSP00000244745,9606.ENSP00000256442,9606.ENSP00000303398,9606.ENSP00000320147,9606.ENSP00000321656,9606.ENSP00000323246,9606.ENSP00000345571,9606.ENSP00000348538,9606.ENSP00000356319,9606.ENSP00000368458,9606.ENSP00000378699,9606.ENSP00000405726,9606.ENSP00000418915,9606.ENSP00000481103	CDC6,AURKA,SOX4,CCNB1,MTBP,EZH2,CDC25C,E2F7,E2F1,RBM38,KIF14,PCNA,CDK1,CDC45,CDKN2A,E2F8
GO:0050790	Regulation of catalytic activity	95	2386	0.2	0.00055	9606.ENSP00000209728,9606.ENSP00000215754,9606.ENSP00000218230,9606.ENSP00000220751,9606.ENSP00000229239,9606.ENSP00000233893,9606.ENSP00000240423,9606.ENSP00000255409,9606.ENSP00000256442,9606.ENSP00000259938,9606.ENSP00000262300,9606.ENSP00000262643,9606.ENSP00000264552,9606.ENSP00000265056,9606.ENSP00000265148,9606.ENSP00000265728,9606.ENSP00000274026,9606.ENSP00000288207,9606.ENSP00000289707,…	CDC6,MIF,PCSK1N,RIPK2,GAPDH,HSPE1,NCAPH,CHI3L1,CCNB1,CLPS,PKMYT1,CCNE1,UBE2S,MCM2,CENPE,DBF4,CCNA2,CCNB2,SLAMF8,CSTB,S100A1,HMGB2,MAD2L1,A2ML1,PLK1,TPX2,NOD2,BIRC5,CLEC7A,LRP8,CDC25A,CXCL10,CST1,PPP1R14B,CKS1B,CLSPN,AURKB,EZH2,CDC25C,DSCC1,PMAIP1,PIF1,EPHB3,CDKN3,CASC5,MAPK15,PLAUR,IFI6,FN1,BLM,UBE2C,IQGAP3,ARHGAP11A,PPP1R14C,KIAA1804,NEK2,KIF14,RGS1,EFNA3,RGS10,FCGR1A,PSRC1,IRAK1,LMO4,MMP9,CDC20…
GO:0045840	Positive regulation of mitotic nuclear division	10	58	0.84	0.00056	9606.ENSP00000216911,9606.ENSP00000247191,9606.ENSP00000257934,9606.ENSP00000275517,9606.ENSP00000301019,9606.ENSP00000301633,9606.ENSP00000313950,9606.ENSP00000348838,9606.ENSP00000401564,9606.ENSP00000453403	AURKA,DLGAP5,ESPL1,CDCA5,CDT1,BIRC5,AURKB,UBE2C,RANBP1,NUSAP1
GO:0006267	Pre-replicative complex assembly involved in nuclear cell cycle dna replication	5	7	1.45	0.00057	9606.ENSP00000216122,9606.ENSP00000262105,9606.ENSP00000265056,9606.ENSP00000307288,9606.ENSP00000480987	MCM5,MCM4,MCM2,MCM7,MCM3
GO:0044238	Primary metabolic process	233	7332	0.1	0.00059	9606.ENSP00000005286,9606.ENSP00000005995,9606.ENSP00000160827,9606.ENSP00000166345,9606.ENSP00000209728,9606.ENSP00000215743,9606.ENSP00000215754,9606.ENSP00000216122,9606.ENSP00000216911,9606.ENSP00000218230,9606.ENSP00000219097,9606.ENSP00000220751,9606.ENSP00000221486,9606.ENSP00000228843,9606.ENSP00000229239,9606.ENSP00000229270,9606.ENSP00000230431,9606.ENSP00000240285,9606.ENSP00000240488,…	TMEM132A,PRSS21,KIF22,TRIP13,CDC6,MMP11,MIF,MCM5,AURKA,PCSK1N,ORC6,RIPK2,RNASEH2A,RAD51AP1,GAPDH,TPI1,DNPH1,RDH10,MND1,INHBA,DDX39A,HIST1H1D,CHRM3,CHI3L1,ADAMDEC1,CCNB1,ESPL1,IGF2BP3,BRIP1,CLPS,MRPL15,GGH,MMP13,LYZ,MCM4,PKMYT1,IL12RB2,CCNE1,POLQ,UBE2S,NEIL3,HRASLS,MCM2,SQLE,CPNE7,IMPA2,PLK4,CCNA2,CDCA5,ST14,FADS2,GLYATL2,BUB1B,HIST1H2BD,TMPRSS3,PRSS33,RPL39L,HMGB2,MAD2L1,CHMP4C,RAD21,DCAF13,MELK,…
GO:0071704	Organic substance metabolic process	244	7755	0.1	0.00059	9606.ENSP00000005286,9606.ENSP00000005995,9606.ENSP00000160827,9606.ENSP00000166345,9606.ENSP00000209728,9606.ENSP00000215743,9606.ENSP00000215754,9606.ENSP00000216122,9606.ENSP00000216911,9606.ENSP00000218230,9606.ENSP00000219097,9606.ENSP00000220751,9606.ENSP00000221486,9606.ENSP00000228843,9606.ENSP00000229239,9606.ENSP00000229270,9606.ENSP00000230431,9606.ENSP00000240285,9606.ENSP00000240488,…	TMEM132A,PRSS21,KIF22,TRIP13,CDC6,MMP11,MIF,MCM5,AURKA,PCSK1N,ORC6,RIPK2,RNASEH2A,RAD51AP1,GAPDH,TPI1,DNPH1,RDH10,MND1,INHBA,DDX39A,HIST1H1D,CHRM3,CHI3L1,ADAMDEC1,CCNB1,ESPL1,IGF2BP3,BRIP1,CLPS,MRPL15,GGH,MMP13,LYZ,MCM4,PKMYT1,IL12RB2,CCNE1,POLQ,UBE2S,NEIL3,HRASLS,MCM2,DBF4,SQLE,CPNE7,IMPA2,PLK4,CCNA2,CDCA5,ST14,FADS2,GLYATL2,BUB1B,HIST1H2BD,TMPRSS3,PRSS33,RPL39L,HMGB2,MAD2L1,CHMP4C,RAD21,DCAF13,…
GO:0006977	DNA damage response, signal transduction by p53 class mediator resulting in cell cycle arrest	10	59	0.83	0.00062	9606.ENSP00000216911,9606.ENSP00000244745,9606.ENSP00000256442,9606.ENSP00000321656,9606.ENSP00000323246,9606.ENSP00000345571,9606.ENSP00000348538,9606.ENSP00000368458,9606.ENSP00000378699,9606.ENSP00000481103	AURKA,SOX4,CCNB1,CDC25C,E2F7,E2F1,RBM38,PCNA,CDK1,E2F8
GO:0043486	Histone exchange	10	59	0.83	0.00062	9606.ENSP00000281453,9606.ENSP00000335463,9606.ENSP00000336868,9606.ENSP00000347168,9606.ENSP00000357308,9606.ENSP00000366956,9606.ENSP00000367034,9606.ENSP00000377007,9606.ENSP00000414109,9606.ENSP00000463154	CENPU,CASC5,CENPA,HIST1H4J,CENPW,HIST1H4H,HIST1H4C,CENPN,HJURP,ANP32E
GO:0045143	Homologous chromosome segregation	10	59	0.83	0.00062	9606.ENSP00000166345,9606.ENSP00000257934,9606.ENSP00000259008,9606.ENSP00000262643,9606.ENSP00000263753,9606.ENSP00000300093,9606.ENSP00000350162,9606.ENSP00000355167,9606.ENSP00000377536,9606.ENSP00000429089	TRIP13,ESPL1,BRIP1,CCNE1,SGOL1,PLK1,SYCP2,HORMAD1,PTTG1,CCNE2
GO:0071900	Regulation of protein serine/threonine kinase activity	32	521	0.39	0.00065	9606.ENSP00000209728,9606.ENSP00000215754,9606.ENSP00000220751,9606.ENSP00000256442,9606.ENSP00000262300,9606.ENSP00000262643,9606.ENSP00000265728,9606.ENSP00000274026,9606.ENSP00000288207,9606.ENSP00000300093,9606.ENSP00000300589,9606.ENSP00000303706,9606.ENSP00000305651,9606.ENSP00000311083,9606.ENSP00000320147,9606.ENSP00000321656,9606.ENSP00000335357,9606.ENSP00000347232,9606.ENSP00000354451,…	CDC6,MIF,RIPK2,CCNB1,PKMYT1,CCNE1,DBF4,CCNA2,CCNB2,PLK1,NOD2,CDC25A,CXCL10,CKS1B,EZH2,CDC25C,CDKN3,BLM,IQGAP3,KIAA1804,PSRC1,IRAK1,DKK1,MAGED1,CKS2,INCENP,CDK1,CXCR4,CDKN2A,PBK,CCNE2,VEGFA
GO:0072331	Signal transduction by p53 class mediator	14	123	0.66	0.00065	9606.ENSP00000215754,9606.ENSP00000216911,9606.ENSP00000244745,9606.ENSP00000256442,9606.ENSP00000321656,9606.ENSP00000323246,9606.ENSP00000326119,9606.ENSP00000342307,9606.ENSP00000345571,9606.ENSP00000348538,9606.ENSP00000355249,9606.ENSP00000368458,9606.ENSP00000378699,9606.ENSP00000481103	MIF,AURKA,SOX4,CCNB1,CDC25C,E2F7,PMAIP1,FOXM1,E2F1,RBM38,E2F2,PCNA,CDK1,E2F8
GO:0051256	Mitotic spindle midzone assembly	5	8	1.4	0.00084	9606.ENSP00000260363,9606.ENSP00000313950,9606.ENSP00000363524,9606.ENSP00000377793,9606.ENSP00000404190	KIF23,AURKB,KIF4A,PRC1,RACGAP1
GO:0051052	Regulation of dna metabolic process	25	360	0.44	0.00093	9606.ENSP00000228843,9606.ENSP00000244534,9606.ENSP00000244573,9606.ENSP00000264233,9606.ENSP00000280326,9606.ENSP00000295688,9606.ENSP00000301019,9606.ENSP00000307705,9606.ENSP00000310356,9606.ENSP00000313950,9606.ENSP00000322180,9606.ENSP00000328174,9606.ENSP00000330074,9606.ENSP00000337691,9606.ENSP00000339566,9606.ENSP00000342307,9606.ENSP00000347232,9606.ENSP00000355966,9606.ENSP00000368458,…	RAD51AP1,HIST1H1D,HIST1H1A,POLQ,CCT5,CCT3,CDT1,HIST1H1E,RMI2,AURKB,DSCC1,PIF1,HIST1H1B,MAPK15,HIST1H1C,FOXM1,BLM,NEK2,PCNA,RAD51,RFC4,CDKN2A,H2AFX,KPNA2,VEGFA
GO:2000113	Negative regulation of cellular macromolecule biosynthetic process	65	1470	0.25	0.00093	9606.ENSP00000209728,9606.ENSP00000229239,9606.ENSP00000230321,9606.ENSP00000234392,9606.ENSP00000244534,9606.ENSP00000258729,9606.ENSP00000262643,9606.ENSP00000265340,9606.ENSP00000271638,9606.ENSP00000292169,9606.ENSP00000293894,9606.ENSP00000295206,9606.ENSP00000296417,9606.ENSP00000296503,9606.ENSP00000300093,9606.ENSP00000301633,9606.ENSP00000306548,9606.ENSP00000307705,9606.ENSP00000308750,…	CDC6,GAPDH,MDFI,VAX2,HIST1H1D,IGF2BP3,CCNE1,PITX1,S100A11,S100A1,SOX8,EN1,H2AFZ,HMGB2,PLK1,BIRC5,MRPL13,HIST1H1E,CBX2,AURKB,TYMS,EZH2,CALR,SOX11,E2F7,PIF1,HIST1H1B,HIST2H2AB,HIST2H3D,BCL11A,HIST1H1C,EIF4EBP1,HIST1H2AD,ETV7,FOXM1,E2F1,HIST1H4J,BLM,HIST1H2AI,HIST1H2AG,HIST1H3J,STAT1,E2F2,HIST3H2A,EPRS,CENPF,HDGF,HIST2H3C,HIST2H2AA,DKK1,MAGED1,HIST1H4H,HIST1H3D,HIST1H4C,PCNA,FOXC1,HELLS,HIST2H3A,HMG…
GO:0007076	Mitotic chromosome condensation	6	16	1.17	0.00097	9606.ENSP00000240423,9606.ENSP00000251496,9606.ENSP00000275517,9606.ENSP00000325017,9606.ENSP00000349961,9606.ENSP00000453403	NCAPH,NCAPG,CDCA5,NCAPD2,SMC4,NUSAP1
GO:0006275	Regulation of dna replication	13	111	0.67	0.00098	9606.ENSP00000209728,9606.ENSP00000265728,9606.ENSP00000271638,9606.ENSP00000274026,9606.ENSP00000301019,9606.ENSP00000322180,9606.ENSP00000323246,9606.ENSP00000347232,9606.ENSP00000368458,9606.ENSP00000376272,9606.ENSP00000378699,9606.ENSP00000393139,9606.ENSP00000481103	CDC6,DBF4,S100A11,CCNA2,CDT1,DSCC1,E2F7,BLM,PCNA,RFC4,CDK1,CDC7,E2F8
GO:0000183	rDNA heterochromatin assembly	8	37	0.93	0.001	9606.ENSP00000333277,9606.ENSP00000347168,9606.ENSP00000352252,9606.ENSP00000358154,9606.ENSP00000366956,9606.ENSP00000366999,9606.ENSP00000367034,9606.ENSP00000385479	HIST2H3D,HIST1H4J,HIST1H3J,HIST2H3C,HIST1H4H,HIST1H3D,HIST1H4C,HIST2H3A
GO:0040001	Establishment of mitotic spindle localization	8	37	0.93	0.001	9606.ENSP00000257934,9606.ENSP00000261597,9606.ENSP00000296509,9606.ENSP00000300093,9606.ENSP00000336868,9606.ENSP00000385510,9606.ENSP00000386348,9606.ENSP00000453403	ESPL1,NDC80,MAD2L1,PLK1,CENPA,GPSM2,SAPCD2,NUSAP1
GO:0000723	Telomere maintenance	13	112	0.66	0.0011	9606.ENSP00000262643,9606.ENSP00000305480,9606.ENSP00000328174,9606.ENSP00000347168,9606.ENSP00000347232,9606.ENSP00000355506,9606.ENSP00000366956,9606.ENSP00000367034,9606.ENSP00000368458,9606.ENSP00000372088,9606.ENSP00000376272,9606.ENSP00000429089,9606.ENSP00000482313	CCNE1,FEN1,PIF1,HIST1H4J,BLM,EXO1,HIST1H4H,HIST1H4C,PCNA,RAD51,RFC4,CCNE2,RECQL4
GO:0019886	Antigen processing and presentation of exogenous peptide antigen via mhc class ii	12	96	0.7	0.0011	9606.ENSP00000160827,9606.ENSP00000260363,9606.ENSP00000260731,9606.ENSP00000263181,9606.ENSP00000265148,9606.ENSP00000324020,9606.ENSP00000336666,9606.ENSP00000361298,9606.ENSP00000363524,9606.ENSP00000384886,9606.ENSP00000404190,9606.ENSP00000432568	KIF22,KIF23,KIF11,KIF18A,CENPE,KIF15,AP1S1,KIF2C,KIF4A,IFI30,RACGAP1,SPTBN2
GO:0034502	Protein localization to chromosome	10	64	0.79	0.0011	9606.ENSP00000297338,9606.ENSP00000300093,9606.ENSP00000303398,9606.ENSP00000313950,9606.ENSP00000320147,9606.ENSP00000330074,9606.ENSP00000335463,9606.ENSP00000336868,9606.ENSP00000358813,9606.ENSP00000378699	RAD21,PLK1,MTBP,AURKB,EZH2,HIST1H1B,CASC5,CENPA,TTK,CDK1
GO:0051445	Regulation of meiotic cell cycle	9	50	0.85	0.0011	9606.ENSP00000166345,9606.ENSP00000303706,9606.ENSP00000320866,9606.ENSP00000321656,9606.ENSP00000337691,9606.ENSP00000355167,9606.ENSP00000356379,9606.ENSP00000358813,9606.ENSP00000361540	TRIP13,CDC25A,CALR,CDC25C,MAPK15,HORMAD1,ASPM,TTK,CDC20
GO:0090329	Regulation of dna-dependent dna replication	9	51	0.85	0.0012	9606.ENSP00000265728,9606.ENSP00000301019,9606.ENSP00000322180,9606.ENSP00000323246,9606.ENSP00000347232,9606.ENSP00000368458,9606.ENSP00000376272,9606.ENSP00000393139,9606.ENSP00000481103	DBF4,CDT1,DSCC1,E2F7,BLM,PCNA,RFC4,CDC7,E2F8
GO:0045859	Regulation of protein kinase activity	42	812	0.31	0.0013	9606.ENSP00000209728,9606.ENSP00000215754,9606.ENSP00000220751,9606.ENSP00000255409,9606.ENSP00000256442,9606.ENSP00000262300,9606.ENSP00000262643,9606.ENSP00000265148,9606.ENSP00000265728,9606.ENSP00000274026,9606.ENSP00000288207,9606.ENSP00000300093,9606.ENSP00000300403,9606.ENSP00000300589,9606.ENSP00000303634,9606.ENSP00000303706,9606.ENSP00000305651,9606.ENSP00000311083,9606.ENSP00000312995,…	CDC6,MIF,RIPK2,CHI3L1,CCNB1,PKMYT1,CCNE1,CENPE,DBF4,CCNA2,CCNB2,PLK1,TPX2,NOD2,LRP8,CDC25A,CXCL10,CKS1B,CLSPN,EZH2,CDC25C,CDKN3,BLM,IQGAP3,KIAA1804,KIF14,FCGR1A,PSRC1,IRAK1,DKK1,MAGED1,CKS2,MST4,INCENP,CDK1,CXCR4,NCAPG2,CDKN2A,PBK,CCNE2,DBNDD1,VEGFA
GO:0048522	Positive regulation of cellular process	184	5579	0.12	0.0013	9606.ENSP00000209728,9606.ENSP00000215754,9606.ENSP00000216127,9606.ENSP00000216911,9606.ENSP00000217026,9606.ENSP00000220751,9606.ENSP00000222598,9606.ENSP00000229239,9606.ENSP00000230431,9606.ENSP00000233893,9606.ENSP00000240285,9606.ENSP00000242208,9606.ENSP00000244534,9606.ENSP00000244573,9606.ENSP00000244745,9606.ENSP00000247191,9606.ENSP00000255409,9606.ENSP00000256442,9606.ENSP00000257934,…	CDC6,MIF,RASD2,AURKA,MYBL2,RIPK2,DLX5,GAPDH,DNPH1,HSPE1,RDH10,INHBA,HIST1H1D,HIST1H1A,SOX4,DLGAP5,CHI3L1,CCNB1,ESPL1,KIF23,NDC80,IL12RB2,CCNE1,EPCAM,CD80,UBE2S,CENPE,PITX1,GAL,DBF4,ANLN,PLK4,S100A11,ATP6V1C2,CCNA2,CDCA5,CCT5,OTX1,ATAD2,S100A1,SOX8,EN1,CCT3,KIAA1524,H2AFZ,POC1A,HMGB2,MAD2L1,RAD21,MELK,PLK1,TPX2,NOD2,CDT1,BIRC5,CLEC7A,MTBP,LRP8,CDC25A,FEN1,CXCL10,CXCL8,CXCL11,HIST1H1E,FANCI,CKS1B,C…
GO:0051171	Regulation of nitrogen compound metabolic process	191	5836	0.11	0.0013	9606.ENSP00000166345,9606.ENSP00000184183,9606.ENSP00000209728,9606.ENSP00000215754,9606.ENSP00000216127,9606.ENSP00000216911,9606.ENSP00000217026,9606.ENSP00000218230,9606.ENSP00000220751,9606.ENSP00000222598,9606.ENSP00000228843,9606.ENSP00000229239,9606.ENSP00000230321,9606.ENSP00000233893,9606.ENSP00000234392,9606.ENSP00000242208,9606.ENSP00000244534,9606.ENSP00000244573,9606.ENSP00000244745,…	TRIP13,ROPN1,CDC6,MIF,RASD2,AURKA,MYBL2,PCSK1N,RIPK2,DLX5,RAD51AP1,GAPDH,MDFI,HSPE1,VAX2,INHBA,HIST1H1D,HIST1H1A,SOX4,DLGAP5,CHI3L1,CCNB1,ESPL1,IGF2BP3,BRIP1,PKMYT1,CCNE1,PRDX1,EPCAM,PKP1,POLQ,CD80,UBE2S,CENPE,PITX1,GAL,DBF4,CCNA2,NFKBIE,CCT5,OTX1,SAMSN1,ATAD2,CCNB2,CSTB,S100A1,SOX8,EN1,CCT3,H2AFZ,HMGB2,MAD2L1,RAD21,A2ML1,PLK1,TPX2,NOD2,CDT1,BIRC5,CLEC7A,MTBP,LRP8,CDC25A,CXCL10,CST1,MRPL13,CDCA7,…
GO:0051653	Spindle localization	9	52	0.84	0.0013	9606.ENSP00000257934,9606.ENSP00000261597,9606.ENSP00000296509,9606.ENSP00000300093,9606.ENSP00000336868,9606.ENSP00000356379,9606.ENSP00000385510,9606.ENSP00000386348,9606.ENSP00000453403	ESPL1,NDC80,MAD2L1,PLK1,CENPA,ASPM,GPSM2,SAPCD2,NUSAP1
GO:0000086	G2/M transition of mitotic cell cycle	14	134	0.62	0.0014	9606.ENSP00000216911,9606.ENSP00000256442,9606.ENSP00000262300,9606.ENSP00000270861,9606.ENSP00000274026,9606.ENSP00000288207,9606.ENSP00000298048,9606.ENSP00000300093,9606.ENSP00000301633,9606.ENSP00000303706,9606.ENSP00000321656,9606.ENSP00000342307,9606.ENSP00000355966,9606.ENSP00000378699	AURKA,CCNB1,PKMYT1,PLK4,CCNA2,CCNB2,MELK,PLK1,BIRC5,CDC25A,CDC25C,FOXM1,NEK2,CDK1
GO:0051640	Organelle localization	34	598	0.35	0.0014	9606.ENSP00000160827,9606.ENSP00000216911,9606.ENSP00000247191,9606.ENSP00000256442,9606.ENSP00000257934,9606.ENSP00000260363,9606.ENSP00000261597,9606.ENSP00000263181,9606.ENSP00000265148,9606.ENSP00000270861,9606.ENSP00000271452,9606.ENSP00000275517,9606.ENSP00000296509,9606.ENSP00000297265,9606.ENSP00000300093,9606.ENSP00000301019,9606.ENSP00000301633,9606.ENSP00000336868,9606.ENSP00000355922,…	KIF22,AURKA,DLGAP5,CCNB1,ESPL1,KIF23,NDC80,KIF18A,CENPE,PLK4,NUF2,CDCA5,MAD2L1,CHMP4C,PLK1,CDT1,BIRC5,CENPA,CENPF,NEK2,KIF14,ASPM,PSRC1,KIF2C,CDCA8,INCENP,CDK1,GPSM2,SAPCD2,KIFC1,KIF1A,NUSAP1,CCDC64B,FAM83D
GO:0080090	Regulation of primary metabolic process	196	6032	0.11	0.0014	9606.ENSP00000166345,9606.ENSP00000184183,9606.ENSP00000209728,9606.ENSP00000215754,9606.ENSP00000216127,9606.ENSP00000216911,9606.ENSP00000217026,9606.ENSP00000218230,9606.ENSP00000220751,9606.ENSP00000222598,9606.ENSP00000228843,9606.ENSP00000229239,9606.ENSP00000230321,9606.ENSP00000233893,9606.ENSP00000234392,9606.ENSP00000240285,9606.ENSP00000242208,9606.ENSP00000244534,9606.ENSP00000244573,…	TRIP13,ROPN1,CDC6,MIF,RASD2,AURKA,MYBL2,PCSK1N,RIPK2,DLX5,RAD51AP1,GAPDH,MDFI,HSPE1,VAX2,RDH10,INHBA,HIST1H1D,HIST1H1A,SOX4,DLGAP5,CHI3L1,CCNB1,ESPL1,IGF2BP3,BRIP1,PKMYT1,CCNE1,PRDX1,EPCAM,PKP1,POLQ,CD80,UBE2S,CENPE,PITX1,GAL,DBF4,SQLE,CCNA2,NFKBIE,CCT5,OTX1,SAMSN1,ATAD2,CCNB2,CSTB,S100A1,SOX8,EN1,CCT3,H2AFZ,HMGB2,MAD2L1,RAD21,A2ML1,PLK1,TPX2,NOD2,CDT1,BIRC5,CLEC7A,MTBP,LRP8,CDC25A,CXCL10,CST1,MR…
GO:0031145	Anaphase-promoting complex-dependent catabolic process	11	83	0.72	0.0015	9606.ENSP00000216911,9606.ENSP00000256442,9606.ENSP00000264552,9606.ENSP00000287598,9606.ENSP00000296509,9606.ENSP00000300093,9606.ENSP00000313950,9606.ENSP00000348838,9606.ENSP00000361540,9606.ENSP00000377536,9606.ENSP00000378699	AURKA,CCNB1,UBE2S,BUB1B,MAD2L1,PLK1,AURKB,UBE2C,CDC20,PTTG1,CDK1
GO:0051781	Positive regulation of cell division	13	117	0.65	0.0015	9606.ENSP00000209728,9606.ENSP00000216911,9606.ENSP00000247191,9606.ENSP00000257934,9606.ENSP00000260363,9606.ENSP00000313950,9606.ENSP00000356319,9606.ENSP00000357189,9606.ENSP00000376306,9606.ENSP00000376753,9606.ENSP00000404190,9606.ENSP00000453403,9606.ENSP00000478570	CDC6,AURKA,DLGAP5,ESPL1,KIF23,AURKB,KIF14,HDGF,CIT,GIPC1,RACGAP1,NUSAP1,VEGFA
GO:0071459	Protein localization to chromosome, centromeric region	6	18	1.12	0.0015	9606.ENSP00000303398,9606.ENSP00000313950,9606.ENSP00000335463,9606.ENSP00000336868,9606.ENSP00000358813,9606.ENSP00000378699	MTBP,AURKB,CASC5,CENPA,TTK,CDK1
GO:0006342	Chromatin silencing	9	54	0.82	0.0016	9606.ENSP00000296417,9606.ENSP00000320147,9606.ENSP00000332790,9606.ENSP00000341094,9606.ENSP00000351589,9606.ENSP00000352119,9606.ENSP00000355656,9606.ENSP00000358155,9606.ENSP00000434024	H2AFZ,EZH2,HIST2H2AB,HIST1H2AD,HIST1H2AI,HIST1H2AG,HIST3H2A,HIST2H2AA,H2AFX
GO:0010558	Negative regulation of macromolecule biosynthetic process	66	1534	0.23	0.0016	9606.ENSP00000209728,9606.ENSP00000229239,9606.ENSP00000230321,9606.ENSP00000234392,9606.ENSP00000244534,9606.ENSP00000258729,9606.ENSP00000262643,9606.ENSP00000265340,9606.ENSP00000271638,9606.ENSP00000292169,9606.ENSP00000293894,9606.ENSP00000295206,9606.ENSP00000296417,9606.ENSP00000296503,9606.ENSP00000300093,9606.ENSP00000301633,9606.ENSP00000306548,9606.ENSP00000307705,9606.ENSP00000308750,…	CDC6,GAPDH,MDFI,VAX2,HIST1H1D,IGF2BP3,CCNE1,PITX1,S100A11,S100A1,SOX8,EN1,H2AFZ,HMGB2,PLK1,BIRC5,MRPL13,HIST1H1E,CBX2,AURKB,TYMS,EZH2,CALR,SOX11,E2F7,PIF1,HIST1H1B,HIST2H2AB,HIST2H3D,BCL11A,HIST1H1C,EIF4EBP1,HIST1H2AD,ETV7,FOXM1,E2F1,HIST1H4J,BLM,HIST1H2AI,HIST1H2AG,HIST1H3J,STAT1,E2F2,HIST3H2A,EPRS,CENPF,HDGF,HIST2H3C,HIST2H2AA,DKK1,MAGED1,HIST1H4H,HIST1H3D,HIST1H4C,PCNA,FOXC1,HELLS,HIST2H3A,TON…
GO:0044773	Mitotic dna damage checkpoint	12	101	0.67	0.0016	9606.ENSP00000216911,9606.ENSP00000244745,9606.ENSP00000256442,9606.ENSP00000312995,9606.ENSP00000321656,9606.ENSP00000323246,9606.ENSP00000345571,9606.ENSP00000347232,9606.ENSP00000348538,9606.ENSP00000368458,9606.ENSP00000378699,9606.ENSP00000481103	AURKA,SOX4,CCNB1,CLSPN,CDC25C,E2F7,E2F1,BLM,RBM38,PCNA,CDK1,E2F8
GO:0071158	Positive regulation of cell cycle arrest	11	84	0.72	0.0016	9606.ENSP00000216911,9606.ENSP00000244745,9606.ENSP00000256442,9606.ENSP00000321656,9606.ENSP00000323246,9606.ENSP00000345571,9606.ENSP00000348538,9606.ENSP00000368458,9606.ENSP00000378699,9606.ENSP00000418915,9606.ENSP00000481103	AURKA,SOX4,CCNB1,CDC25C,E2F7,E2F1,RBM38,PCNA,CDK1,CDKN2A,E2F8
GO:0090304	Nucleic acid metabolic process	86	2178	0.2	0.0018	9606.ENSP00000160827,9606.ENSP00000166345,9606.ENSP00000209728,9606.ENSP00000216122,9606.ENSP00000219097,9606.ENSP00000221486,9606.ENSP00000228843,9606.ENSP00000240488,9606.ENSP00000242776,9606.ENSP00000256442,9606.ENSP00000259008,9606.ENSP00000262105,9606.ENSP00000262643,9606.ENSP00000264233,9606.ENSP00000264596,9606.ENSP00000265056,9606.ENSP00000275517,9606.ENSP00000296503,9606.ENSP00000297338,…	KIF22,TRIP13,CDC6,MCM5,ORC6,RNASEH2A,RAD51AP1,MND1,DDX39A,CCNB1,BRIP1,MCM4,CCNE1,POLQ,NEIL3,MCM2,CDCA5,HMGB2,RAD21,DCAF13,KIAA0101,TK1,FEN1,MCM7,RMI2,FANCI,CLSPN,EXOSC4,TYMS,GEN1,EZH2,DCTPP1,APOBEC3B,PIF1,LIN9,NME1,ETV7,FOXM1,E2F1,HIST1H4J,BLM,RBM38,LAGE3,WDHD1,ILF2,HORMAD1,E2F2,EXO1,HIST3H2A,EPRS,CENPF,DTL,UBE2T,TDRKH,HMGB3,LMO4,RAD54L,SRPK1,HIST1H4H,HIST1H4C,PCNA,ISG15,RAD51,FANCA,RFC4,PTTG1,HE…
GO:0050896	Response to stimulus	248	8046	0.09	0.0019	9606.ENSP00000160827,9606.ENSP00000166345,9606.ENSP00000209728,9606.ENSP00000215754,9606.ENSP00000216122,9606.ENSP00000216127,9606.ENSP00000216911,9606.ENSP00000217026,9606.ENSP00000218230,9606.ENSP00000220751,9606.ENSP00000221486,9606.ENSP00000222598,9606.ENSP00000228843,9606.ENSP00000229239,9606.ENSP00000233893,9606.ENSP00000234392,9606.ENSP00000242208,9606.ENSP00000244745,9606.ENSP00000246515,…	KIF22,TRIP13,CDC6,MIF,MCM5,RASD2,AURKA,MYBL2,PCSK1N,RIPK2,RNASEH2A,DLX5,RAD51AP1,GAPDH,HSPE1,VAX2,INHBA,SOX4,SLURP1,DLGAP5,CHRM3,CHI3L1,ADAMDEC1,CCNB1,BRIP1,CLPS,MRPL15,GGH,MMP13,LYZ,LMNB1,MCM4,IL12RB2,COTL1,CCNE1,PRDX1,BPI,KIF18A,EPCAM,PKP1,POLQ,CD80,NEIL3,MCM2,GAL,SQLE,MTFP1,BCL2A1,CPNE7,IMPA2,S100A11,ATP6V1C2,CCNA2,CDCA5,GSDMC,CCT5,DSC2,SLAMF8,CSTB,S100A1,AQP5,PRSS33,SOX8,S100P,H2AFZ,HMGB2,RAD…
GO:0007143	Female meiotic nuclear division	7	30	0.97	0.0021	9606.ENSP00000166345,9606.ENSP00000216911,9606.ENSP00000240423,9606.ENSP00000300093,9606.ENSP00000350162,9606.ENSP00000358813,9606.ENSP00000411532	TRIP13,AURKA,NCAPH,PLK1,SYCP2,TTK,TOP2A
GO:0043549	Regulation of kinase activity	45	918	0.29	0.0021	9606.ENSP00000209728,9606.ENSP00000215754,9606.ENSP00000220751,9606.ENSP00000255409,9606.ENSP00000256442,9606.ENSP00000262300,9606.ENSP00000262643,9606.ENSP00000265148,9606.ENSP00000265728,9606.ENSP00000274026,9606.ENSP00000288207,9606.ENSP00000289707,9606.ENSP00000300093,9606.ENSP00000300403,9606.ENSP00000300589,9606.ENSP00000303634,9606.ENSP00000303706,9606.ENSP00000305651,9606.ENSP00000311083,…	CDC6,MIF,RIPK2,CHI3L1,CCNB1,PKMYT1,CCNE1,CENPE,DBF4,CCNA2,CCNB2,SLAMF8,PLK1,TPX2,NOD2,LRP8,CDC25A,CXCL10,CKS1B,CLSPN,EZH2,CDC25C,EPHB3,CDKN3,BLM,IQGAP3,KIAA1804,KIF14,FCGR1A,PSRC1,IRAK1,LMO4,DKK1,MAGED1,CKS2,MST4,INCENP,CDK1,CXCR4,NCAPG2,CDKN2A,PBK,CCNE2,DBNDD1,VEGFA
GO:0048518	Positive regulation of biological process	197	6112	0.11	0.0021	9606.ENSP00000209728,9606.ENSP00000215754,9606.ENSP00000216127,9606.ENSP00000216911,9606.ENSP00000217026,9606.ENSP00000220751,9606.ENSP00000222598,9606.ENSP00000229239,9606.ENSP00000230431,9606.ENSP00000233893,9606.ENSP00000240285,9606.ENSP00000242208,9606.ENSP00000244534,9606.ENSP00000244573,9606.ENSP00000244745,9606.ENSP00000247191,9606.ENSP00000255380,9606.ENSP00000255409,9606.ENSP00000256442,…	CDC6,MIF,RASD2,AURKA,MYBL2,RIPK2,DLX5,GAPDH,DNPH1,HSPE1,RDH10,INHBA,HIST1H1D,HIST1H1A,SOX4,DLGAP5,CHRM3,CHI3L1,CCNB1,ESPL1,KIF23,NDC80,IL12RB2,CCNE1,EPCAM,PKP1,CD80,UBE2S,CENPE,PITX1,GAL,DBF4,ANLN,PLK4,S100A11,ATP6V1C2,CCNA2,CDCA5,CCT5,OTX1,ATAD2,S100A1,SOX8,EN1,CCT3,KIAA1524,H2AFZ,POC1A,HMGB2,MAD2L1,CHMP4C,RAD21,MELK,PLK1,TPX2,NOD2,CDT1,BIRC5,CLEC7A,MTBP,LRP8,CDC25A,FEN1,CXCL10,CXCL8,CXCL11,HIST…
GO:0051315	Attachment of mitotic spindle microtubules to kinetochore	5	11	1.26	0.0022	9606.ENSP00000261597,9606.ENSP00000265148,9606.ENSP00000271452,9606.ENSP00000301019,9606.ENSP00000361298	NDC80,CENPE,NUF2,CDT1,KIF2C
GO:1902969	Mitotic dna replication	5	11	1.26	0.0022	9606.ENSP00000262105,9606.ENSP00000265056,9606.ENSP00000372088,9606.ENSP00000405726,9606.ENSP00000480987	MCM4,MCM2,RAD51,CDC45,MCM3
GO:0007276	Gamete generation	36	673	0.33	0.0024	9606.ENSP00000005995,9606.ENSP00000166345,9606.ENSP00000184183,9606.ENSP00000216911,9606.ENSP00000240423,9606.ENSP00000244573,9606.ENSP00000256442,9606.ENSP00000259008,9606.ENSP00000263181,9606.ENSP00000263382,9606.ENSP00000293894,9606.ENSP00000295746,9606.ENSP00000296277,9606.ENSP00000296484,9606.ENSP00000296503,9606.ENSP00000300093,9606.ENSP00000320866,9606.ENSP00000335463,9606.ENSP00000345571,…	PRSS21,TRIP13,ROPN1,AURKA,NCAPH,HIST1H1A,CCNB1,BRIP1,KIF18A,ASF1B,SOX8,KIAA1524,RPL39L,POC1A,HMGB2,PLK1,CALR,CASC5,E2F1,SYCP2,HORMAD1,ASPM,TDRKH,TTK,SRPK1,PRDX4,FOXC1,FANCA,PTTG1,KIFC1,RACGAP1,TOP2A,ROPN1B,MYBL1,H2AFX,PAFAH1B3
GO:0031327	Negative regulation of cellular biosynthetic process	67	1592	0.22	0.0025	9606.ENSP00000209728,9606.ENSP00000229239,9606.ENSP00000230321,9606.ENSP00000234392,9606.ENSP00000244534,9606.ENSP00000258729,9606.ENSP00000262643,9606.ENSP00000265340,9606.ENSP00000271638,9606.ENSP00000292169,9606.ENSP00000293894,9606.ENSP00000295206,9606.ENSP00000296417,9606.ENSP00000296503,9606.ENSP00000300093,9606.ENSP00000301633,9606.ENSP00000306548,9606.ENSP00000307705,9606.ENSP00000308750,…	CDC6,GAPDH,MDFI,VAX2,HIST1H1D,IGF2BP3,CCNE1,PITX1,S100A11,S100A1,SOX8,EN1,H2AFZ,HMGB2,PLK1,BIRC5,MRPL13,HIST1H1E,CBX2,AURKB,TYMS,EZH2,CALR,SOX11,E2F7,PIF1,HIST1H1B,HIST2H2AB,HIST2H3D,BCL11A,HIST1H1C,EIF4EBP1,HIST1H2AD,ETV7,FOXM1,E2F1,HIST1H4J,BLM,HIST1H2AI,HIST1H2AG,HIST1H3J,STAT1,E2F2,HIST3H2A,EPRS,CENPF,HDGF,HIST2H3C,HIST2H2AA,DKK1,MAGED1,HIST1H4H,HIST1H3D,HIST1H4C,PCNA,FOXC1,HELLS,HIST2H3A,TON…
GO:0045910	Negative regulation of dna recombination	8	44	0.86	0.0026	9606.ENSP00000244534,9606.ENSP00000244573,9606.ENSP00000264233,9606.ENSP00000307705,9606.ENSP00000310356,9606.ENSP00000330074,9606.ENSP00000339566,9606.ENSP00000347232	HIST1H1D,HIST1H1A,POLQ,HIST1H1E,RMI2,HIST1H1B,HIST1H1C,BLM
GO:0046483	Heterocycle metabolic process	105	2840	0.17	0.0026	9606.ENSP00000160827,9606.ENSP00000166345,9606.ENSP00000209728,9606.ENSP00000216122,9606.ENSP00000219097,9606.ENSP00000221486,9606.ENSP00000228843,9606.ENSP00000229239,9606.ENSP00000229270,9606.ENSP00000230431,9606.ENSP00000240488,9606.ENSP00000242776,9606.ENSP00000256442,9606.ENSP00000259008,9606.ENSP00000260118,9606.ENSP00000262105,9606.ENSP00000262643,9606.ENSP00000264233,9606.ENSP00000264596,…	KIF22,TRIP13,CDC6,MCM5,ORC6,RNASEH2A,RAD51AP1,GAPDH,TPI1,DNPH1,MND1,DDX39A,CCNB1,BRIP1,GGH,MCM4,CCNE1,POLQ,NEIL3,MCM2,CDCA5,HMGB2,RAD21,DCAF13,KIAA0101,TK1,FEN1,MCM7,RMI2,FANCI,CLSPN,EXOSC4,TYMS,CYC1,GEN1,EZH2,DCTPP1,APOBEC3B,PIF1,LIN9,IDH2,NME1,ETV7,FOXM1,E2F1,HIST1H4J,BLM,RBM38,LAGE3,RRM2,WDHD1,PNP,ILF2,HORMAD1,E2F2,EXO1,HIST3H2A,EPRS,CENPF,DTL,UBE2T,TDRKH,HMGB3,LMO4,RAD54L,SRPK1,PSAT1,SLC25A39…
GO:0065007	Biological regulation	349	12171	0.06	0.0026	9606.ENSP00000166345,9606.ENSP00000184183,9606.ENSP00000209728,9606.ENSP00000215743,9606.ENSP00000215754,9606.ENSP00000216127,9606.ENSP00000216911,9606.ENSP00000217026,9606.ENSP00000218230,9606.ENSP00000219097,9606.ENSP00000220751,9606.ENSP00000222598,9606.ENSP00000228843,9606.ENSP00000229239,9606.ENSP00000230321,9606.ENSP00000230431,9606.ENSP00000233893,9606.ENSP00000234392,9606.ENSP00000240285,…	TRIP13,ROPN1,CDC6,MMP11,MIF,RASD2,AURKA,MYBL2,PCSK1N,ORC6,RIPK2,DLX5,RAD51AP1,GAPDH,MDFI,DNPH1,HSPE1,VAX2,RDH10,NCAPH,INHBA,HIST1H1D,HIST1H1A,SOX4,SLURP1,DLGAP5,CHRM3,CHI3L1,ADAMDEC1,CCNB1,ESPL1,IGF2BP3,BRIP1,CLPS,KIF23,KIF11,LYZ,LMNB1,NDC80,PKMYT1,IL12RB2,COTL1,CCNE1,PRDX1,BPI,KIF18A,EPCAM,CAPG,PKP1,POLQ,CD80,UBE2S,MCM2,CENPE,PITX1,GAL,DBF4,ANLN,SQLE,BCL2A1,IMPA2,PLK4,S100A11,ATP6V1C2,CCNA2,NFKB…
GO:2000134	Negative regulation of g1/s transition of mitotic cell cycle	12	107	0.65	0.0026	9606.ENSP00000216911,9606.ENSP00000244745,9606.ENSP00000256442,9606.ENSP00000320147,9606.ENSP00000321656,9606.ENSP00000323246,9606.ENSP00000345571,9606.ENSP00000348538,9606.ENSP00000368458,9606.ENSP00000378699,9606.ENSP00000418915,9606.ENSP00000481103	AURKA,SOX4,CCNB1,EZH2,CDC25C,E2F7,E2F1,RBM38,PCNA,CDK1,CDKN2A,E2F8
GO:0060255	Regulation of macromolecule metabolic process	204	6407	0.1	0.0028	9606.ENSP00000166345,9606.ENSP00000184183,9606.ENSP00000209728,9606.ENSP00000215754,9606.ENSP00000216127,9606.ENSP00000216911,9606.ENSP00000217026,9606.ENSP00000218230,9606.ENSP00000220751,9606.ENSP00000222598,9606.ENSP00000228843,9606.ENSP00000229239,9606.ENSP00000230321,9606.ENSP00000233893,9606.ENSP00000234392,9606.ENSP00000242208,9606.ENSP00000244534,9606.ENSP00000244573,9606.ENSP00000244745,…	TRIP13,ROPN1,CDC6,MIF,RASD2,AURKA,MYBL2,PCSK1N,RIPK2,DLX5,RAD51AP1,GAPDH,MDFI,HSPE1,VAX2,INHBA,HIST1H1D,HIST1H1A,SOX4,DLGAP5,CHI3L1,CCNB1,ESPL1,IGF2BP3,BRIP1,PKMYT1,IL12RB2,CCNE1,PRDX1,BPI,EPCAM,PKP1,POLQ,CD80,UBE2S,CENPE,PITX1,GAL,DBF4,S100A11,CCNA2,NFKBIE,CCT5,OTX1,SAMSN1,ATAD2,CCNB2,CSTB,S100A1,SOX8,EN1,CCT3,H2AFZ,HMGB2,MAD2L1,RAD21,A2ML1,PLK1,TPX2,NOD2,CDT1,BIRC5,CLEC7A,MTBP,LRP8,CDC25A,CXCL1…
GO:0006725	Cellular aromatic compound metabolic process	106	2882	0.17	0.0029	9606.ENSP00000160827,9606.ENSP00000166345,9606.ENSP00000209728,9606.ENSP00000216122,9606.ENSP00000219097,9606.ENSP00000221486,9606.ENSP00000228843,9606.ENSP00000229239,9606.ENSP00000229270,9606.ENSP00000230431,9606.ENSP00000240488,9606.ENSP00000242776,9606.ENSP00000256442,9606.ENSP00000259008,9606.ENSP00000260118,9606.ENSP00000262105,9606.ENSP00000262643,9606.ENSP00000264233,9606.ENSP00000264596,…	KIF22,TRIP13,CDC6,MCM5,ORC6,RNASEH2A,RAD51AP1,GAPDH,TPI1,DNPH1,MND1,DDX39A,CCNB1,BRIP1,GGH,MCM4,CCNE1,POLQ,NEIL3,MCM2,SQLE,CDCA5,HMGB2,RAD21,DCAF13,KIAA0101,TK1,FEN1,MCM7,RMI2,FANCI,CLSPN,EXOSC4,TYMS,CYC1,GEN1,EZH2,DCTPP1,APOBEC3B,PIF1,LIN9,IDH2,NME1,ETV7,FOXM1,E2F1,HIST1H4J,BLM,RBM38,LAGE3,RRM2,WDHD1,PNP,ILF2,HORMAD1,E2F2,EXO1,HIST3H2A,EPRS,CENPF,DTL,UBE2T,TDRKH,SLC16A10,HMGB3,LMO4,RAD54L,SRPK1,…
GO:2000105	Positive regulation of dna-dependent dna replication	5	12	1.22	0.003	9606.ENSP00000265728,9606.ENSP00000301019,9606.ENSP00000323246,9606.ENSP00000393139,9606.ENSP00000481103	DBF4,CDT1,E2F7,CDC7,E2F8
GO:0008152	Metabolic process	253	8298	0.08	0.0031	9606.ENSP00000005286,9606.ENSP00000005995,9606.ENSP00000160827,9606.ENSP00000166345,9606.ENSP00000209728,9606.ENSP00000215743,9606.ENSP00000215754,9606.ENSP00000216122,9606.ENSP00000216911,9606.ENSP00000218230,9606.ENSP00000219097,9606.ENSP00000220751,9606.ENSP00000221486,9606.ENSP00000228843,9606.ENSP00000229239,9606.ENSP00000229270,9606.ENSP00000230431,9606.ENSP00000240285,9606.ENSP00000240488,…	TMEM132A,PRSS21,KIF22,TRIP13,CDC6,MMP11,MIF,MCM5,AURKA,PCSK1N,ORC6,RIPK2,RNASEH2A,RAD51AP1,GAPDH,TPI1,DNPH1,RDH10,MND1,INHBA,DDX39A,HIST1H1D,CHRM3,CHI3L1,ADAMDEC1,CCNB1,ESPL1,IGF2BP3,BRIP1,CLPS,MRPL15,GGH,MMP13,LYZ,MCM4,PKMYT1,IL12RB2,CCNE1,PRDX1,POLQ,UBE2S,NEIL3,HRASLS,MCM2,DBF4,SQLE,CPNE7,IMPA2,PLK4,CCNA2,CDCA5,NDUFB9,ST14,FADS2,GLYATL2,BUB1B,HIST1H2BD,TMPRSS3,PRSS33,RPL39L,HMGB2,MAD2L1,CHMP4C,…
GO:0046605	Regulation of centrosome cycle	9	60	0.78	0.0032	9606.ENSP00000216911,9606.ENSP00000260731,9606.ENSP00000270861,9606.ENSP00000296484,9606.ENSP00000297265,9606.ENSP00000318977,9606.ENSP00000355966,9606.ENSP00000360944,9606.ENSP00000401564	AURKA,KIF11,PLK4,POC1A,CHMP4C,GEN1,NEK2,STIL,RANBP1
GO:0031323	Regulation of cellular metabolic process	199	6239	0.1	0.0034	9606.ENSP00000166345,9606.ENSP00000184183,9606.ENSP00000209728,9606.ENSP00000215754,9606.ENSP00000216127,9606.ENSP00000216911,9606.ENSP00000217026,9606.ENSP00000218230,9606.ENSP00000220751,9606.ENSP00000222598,9606.ENSP00000228843,9606.ENSP00000229239,9606.ENSP00000230321,9606.ENSP00000233893,9606.ENSP00000234392,9606.ENSP00000240285,9606.ENSP00000242208,9606.ENSP00000244534,9606.ENSP00000244573,…	TRIP13,ROPN1,CDC6,MIF,RASD2,AURKA,MYBL2,PCSK1N,RIPK2,DLX5,RAD51AP1,GAPDH,MDFI,HSPE1,VAX2,RDH10,INHBA,HIST1H1D,HIST1H1A,SOX4,DLGAP5,CHI3L1,CCNB1,ESPL1,IGF2BP3,BRIP1,PKMYT1,CCNE1,PRDX1,EPCAM,PKP1,POLQ,CD80,UBE2S,CENPE,PITX1,GAL,DBF4,S100A11,ATP6V1C2,CCNA2,NFKBIE,CCT5,OTX1,SAMSN1,ATAD2,CCNB2,SLAMF8,CSTB,S100A1,SOX8,EN1,CCT3,H2AFZ,HMGB2,MAD2L1,RAD21,A2ML1,PLK1,TPX2,NOD2,CDT1,BIRC5,CLEC7A,MTBP,LRP8,CD…
GO:0006139	Nucleobase-containing compound metabolic process	99	2659	0.17	0.0035	9606.ENSP00000160827,9606.ENSP00000166345,9606.ENSP00000209728,9606.ENSP00000216122,9606.ENSP00000219097,9606.ENSP00000221486,9606.ENSP00000228843,9606.ENSP00000229239,9606.ENSP00000229270,9606.ENSP00000230431,9606.ENSP00000240488,9606.ENSP00000242776,9606.ENSP00000256442,9606.ENSP00000259008,9606.ENSP00000262105,9606.ENSP00000262643,9606.ENSP00000264233,9606.ENSP00000264596,9606.ENSP00000265056,…	KIF22,TRIP13,CDC6,MCM5,ORC6,RNASEH2A,RAD51AP1,GAPDH,TPI1,DNPH1,MND1,DDX39A,CCNB1,BRIP1,MCM4,CCNE1,POLQ,NEIL3,MCM2,CDCA5,HMGB2,RAD21,DCAF13,KIAA0101,TK1,FEN1,MCM7,RMI2,FANCI,CLSPN,EXOSC4,TYMS,CYC1,GEN1,EZH2,DCTPP1,APOBEC3B,PIF1,LIN9,IDH2,NME1,ETV7,FOXM1,E2F1,HIST1H4J,BLM,RBM38,LAGE3,RRM2,WDHD1,PNP,ILF2,HORMAD1,E2F2,EXO1,HIST3H2A,EPRS,CENPF,DTL,UBE2T,TDRKH,HMGB3,LMO4,RAD54L,SRPK1,HIST1H4H,HIST1H4C,…
GO:0043085	Positive regulation of catalytic activity	63	1489	0.23	0.0036	9606.ENSP00000209728,9606.ENSP00000215754,9606.ENSP00000220751,9606.ENSP00000233893,9606.ENSP00000240423,9606.ENSP00000255409,9606.ENSP00000256442,9606.ENSP00000259938,9606.ENSP00000264552,9606.ENSP00000265148,9606.ENSP00000265728,9606.ENSP00000292169,9606.ENSP00000296503,9606.ENSP00000300093,9606.ENSP00000300403,9606.ENSP00000300589,9606.ENSP00000302569,9606.ENSP00000303634,9606.ENSP00000311083,…	CDC6,MIF,RIPK2,HSPE1,NCAPH,CHI3L1,CCNB1,CLPS,UBE2S,CENPE,DBF4,S100A1,HMGB2,PLK1,TPX2,NOD2,CLEC7A,LRP8,CKS1B,CLSPN,AURKB,EZH2,DSCC1,PMAIP1,EPHB3,MAPK15,FN1,UBE2C,IQGAP3,ARHGAP11A,KIAA1804,NEK2,KIF14,RGS1,EFNA3,RGS10,FCGR1A,PSRC1,IRAK1,LMO4,CDC20,EDN2,CLPSL1,DKK1,MAGED1,CKS2,PCNA,RFC4,MST4,INCENP,CDK1,CXCR4,NCAPG2,RANBP1,RACGAP1,CLDN4,DEPDC1,CDKN2A,PBK,RASAL1,APOC1,APOC2,VEGFA
GO:0003006	Developmental process involved in reproduction	45	945	0.28	0.0037	9606.ENSP00000005995,9606.ENSP00000166345,9606.ENSP00000184183,9606.ENSP00000230321,9606.ENSP00000240285,9606.ENSP00000242208,9606.ENSP00000244573,9606.ENSP00000256442,9606.ENSP00000259008,9606.ENSP00000263181,9606.ENSP00000263382,9606.ENSP00000270861,9606.ENSP00000278742,9606.ENSP00000293894,9606.ENSP00000295746,9606.ENSP00000296277,9606.ENSP00000296484,9606.ENSP00000296503,9606.ENSP00000308750,…	PRSS21,TRIP13,ROPN1,MDFI,RDH10,INHBA,HIST1H1A,CCNB1,BRIP1,KIF18A,ASF1B,PLK4,ST14,SOX8,KIAA1524,RPL39L,POC1A,HMGB2,CBX2,CALR,E2F7,CASC5,COL9A3,E2F1,SYCP2,HORMAD1,ASPM,TDRKH,SRPK1,PRDX4,FOXC1,SDC1,SERPINB5,GJB2,FANCA,PTTG1,SPP1,KIFC1,RACGAP1,ROPN1B,MYBL1,H2AFX,PAFAH1B3,VEGFA,E2F8
GO:0051172	Negative regulation of nitrogen compound metabolic process	92	2429	0.18	0.0037	9606.ENSP00000215754,9606.ENSP00000216127,9606.ENSP00000218230,9606.ENSP00000229239,9606.ENSP00000230321,9606.ENSP00000234392,9606.ENSP00000244534,9606.ENSP00000244573,9606.ENSP00000244745,9606.ENSP00000256442,9606.ENSP00000258729,9606.ENSP00000262643,9606.ENSP00000263946,9606.ENSP00000264233,9606.ENSP00000265340,9606.ENSP00000285670,9606.ENSP00000291568,9606.ENSP00000292169,9606.ENSP00000293894,…	MIF,RASD2,PCSK1N,GAPDH,MDFI,VAX2,HIST1H1D,HIST1H1A,SOX4,CCNB1,IGF2BP3,CCNE1,PKP1,POLQ,PITX1,SAMSN1,CSTB,S100A1,SOX8,EN1,H2AFZ,HMGB2,MAD2L1,A2ML1,PLK1,BIRC5,CST1,MRPL13,HIST1H1E,CBX2,PPP1R14B,RMI2,AURKB,TYMS,EZH2,CALR,SOX11,E2F7,PIF1,HIST1H1B,HIST2H2AB,HIST2H3D,BCL11A,PLAUR,HIST1H1C,EIF4EBP1,HIST1H2AD,ETV7,FOXM1,IFI6,E2F1,HIST1H4J,BLM,RBM38,HIST1H2AI,HIST1H2AG,HIST1H3J,STAT1,E2F2,PPP1R14C,HIST3H2A…
GO:0051382	Kinetochore assembly	5	13	1.18	0.0039	9606.ENSP00000265148,9606.ENSP00000336868,9606.ENSP00000355922,9606.ENSP00000357308,9606.ENSP00000377007	CENPE,CENPA,CENPF,CENPW,CENPN
GO:0051988	Regulation of attachment of spindle microtubules to kinetochore	5	13	1.18	0.0039	9606.ENSP00000256442,9606.ENSP00000313950,9606.ENSP00000323300,9606.ENSP00000355966,9606.ENSP00000404190	CCNB1,AURKB,SPAG5,NEK2,RACGAP1
GO:0010605	Negative regulation of macromolecule metabolic process	105	2875	0.16	0.004	9606.ENSP00000209728,9606.ENSP00000215754,9606.ENSP00000216127,9606.ENSP00000216911,9606.ENSP00000218230,9606.ENSP00000229239,9606.ENSP00000230321,9606.ENSP00000234392,9606.ENSP00000242208,9606.ENSP00000244534,9606.ENSP00000244573,9606.ENSP00000244745,9606.ENSP00000256442,9606.ENSP00000258729,9606.ENSP00000259008,9606.ENSP00000262643,9606.ENSP00000262865,9606.ENSP00000263946,9606.ENSP00000264233,…	CDC6,MIF,RASD2,AURKA,PCSK1N,GAPDH,MDFI,VAX2,INHBA,HIST1H1D,HIST1H1A,SOX4,CCNB1,IGF2BP3,BRIP1,CCNE1,BPI,PKP1,POLQ,PITX1,S100A11,SAMSN1,CSTB,S100A1,SOX8,EN1,H2AFZ,HMGB2,MAD2L1,A2ML1,PLK1,BIRC5,CST1,MRPL13,HIST1H1E,CBX2,PPP1R14B,RMI2,AURKB,EXOSC4,TYMS,EZH2,CALR,SOX11,E2F7,PIF1,HIST1H1B,HIST2H2AB,HIST2H3D,NME1,BCL11A,PLAUR,HIST1H1C,EIF4EBP1,HIST1H2AD,ETV7,FOXM1,IFI6,E2F1,FN1,HIST1H4J,BLM,RBM38,HIST1H…
GO:0034645	Cellular macromolecule biosynthetic process	66	1592	0.22	0.0041	9606.ENSP00000166345,9606.ENSP00000209728,9606.ENSP00000216122,9606.ENSP00000219097,9606.ENSP00000221486,9606.ENSP00000242208,9606.ENSP00000256442,9606.ENSP00000258729,9606.ENSP00000259008,9606.ENSP00000260102,9606.ENSP00000262105,9606.ENSP00000262643,9606.ENSP00000264233,9606.ENSP00000265056,9606.ENSP00000265728,9606.ENSP00000296277,9606.ENSP00000300035,9606.ENSP00000301019,9606.ENSP00000301634,…	TRIP13,CDC6,MCM5,ORC6,RNASEH2A,INHBA,CCNB1,IGF2BP3,BRIP1,MRPL15,MCM4,CCNE1,POLQ,MCM2,DBF4,RPL39L,KIAA0101,CDT1,TK1,FEN1,MRPL13,MCM7,RMI2,CLSPN,TYMS,GEN1,DSCC1,PIF1,LIN9,EIF4EBP1,ETV7,E2F1,HIST1H4J,BLM,RRM2,WDHD1,ILF2,E2F2,EXO1,EPRS,CENPF,DTL,LMO4,MRPL14,EXTL1,HIST1H4H,HIST1H4C,PCNA,ISG15,RAD51,RFC4,PTTG1,CDK1,MUC16,MRPS12,TONSL,NCAPG2,ACAN,CDC7,HMGA1,CDC45,MCM10,CCNE2,MUC5B,MCM3,RECQL4
GO:0048609	Multicellular organismal reproductive process	40	807	0.29	0.0041	9606.ENSP00000005995,9606.ENSP00000166345,9606.ENSP00000184183,9606.ENSP00000216911,9606.ENSP00000240423,9606.ENSP00000242208,9606.ENSP00000244573,9606.ENSP00000256442,9606.ENSP00000259008,9606.ENSP00000263181,9606.ENSP00000263382,9606.ENSP00000293894,9606.ENSP00000295746,9606.ENSP00000296277,9606.ENSP00000296484,9606.ENSP00000296503,9606.ENSP00000300093,9606.ENSP00000320866,9606.ENSP00000335463,…	PRSS21,TRIP13,ROPN1,AURKA,NCAPH,INHBA,HIST1H1A,CCNB1,BRIP1,KIF18A,ASF1B,SOX8,KIAA1524,RPL39L,POC1A,HMGB2,PLK1,CALR,CASC5,E2F1,SYCP2,HORMAD1,ASPM,TDRKH,TTK,SRPK1,PCNA,PRDX4,FOXC1,GJB2,FANCA,PTTG1,SPP1,KIFC1,RACGAP1,TOP2A,ROPN1B,MYBL1,H2AFX,PAFAH1B3
GO:0019222	Regulation of metabolic process	217	6948	0.09	0.0042	9606.ENSP00000166345,9606.ENSP00000184183,9606.ENSP00000209728,9606.ENSP00000215754,9606.ENSP00000216127,9606.ENSP00000216911,9606.ENSP00000217026,9606.ENSP00000218230,9606.ENSP00000220751,9606.ENSP00000222598,9606.ENSP00000228843,9606.ENSP00000229239,9606.ENSP00000230321,9606.ENSP00000233893,9606.ENSP00000234392,9606.ENSP00000240285,9606.ENSP00000242208,9606.ENSP00000244534,9606.ENSP00000244573,…	TRIP13,ROPN1,CDC6,MIF,RASD2,AURKA,MYBL2,PCSK1N,RIPK2,DLX5,RAD51AP1,GAPDH,MDFI,HSPE1,VAX2,RDH10,INHBA,HIST1H1D,HIST1H1A,SOX4,DLGAP5,CHI3L1,CCNB1,ESPL1,IGF2BP3,BRIP1,PKMYT1,IL12RB2,CCNE1,PRDX1,BPI,EPCAM,PKP1,POLQ,CD80,UBE2S,CENPE,PITX1,GAL,DBF4,SQLE,S100A11,ATP6V1C2,CCNA2,NFKBIE,CCT5,OTX1,SAMSN1,ATAD2,CCNB2,SLAMF8,CSTB,S100A1,SOX8,EN1,CCT3,H2AFZ,HMGB2,MAD2L1,RAD21,A2ML1,PLK1,TPX2,NOD2,CDT1,BIRC5,CL…
GO:0060236	Regulation of mitotic spindle organization	7	35	0.9	0.0043	9606.ENSP00000297265,9606.ENSP00000300093,9606.ENSP00000300403,9606.ENSP00000326550,9606.ENSP00000358925,9606.ENSP00000362937,9606.ENSP00000385510	CHMP4C,PLK1,TPX2,TACC3,PSRC1,RCC1,GPSM2
GO:0098532	Histone h3-k27 trimethylation	4	6	1.42	0.0044	9606.ENSP00000244534,9606.ENSP00000307705,9606.ENSP00000320147,9606.ENSP00000339566	HIST1H1D,HIST1H1E,EZH2,HIST1H1C
GO:0002478	Antigen processing and presentation of exogenous peptide antigen	15	174	0.54	0.0045	9606.ENSP00000160827,9606.ENSP00000260363,9606.ENSP00000260731,9606.ENSP00000263181,9606.ENSP00000265148,9606.ENSP00000320866,9606.ENSP00000324020,9606.ENSP00000336666,9606.ENSP00000346206,9606.ENSP00000358165,9606.ENSP00000361298,9606.ENSP00000363524,9606.ENSP00000384886,9606.ENSP00000404190,9606.ENSP00000432568	KIF22,KIF23,KIF11,KIF18A,CENPE,CALR,KIF15,AP1S1,TAP1,FCGR1A,KIF2C,KIF4A,IFI30,RACGAP1,SPTBN2
GO:0007098	Centrosome cycle	10	81	0.69	0.005	9606.ENSP00000216911,9606.ENSP00000260731,9606.ENSP00000263753,9606.ENSP00000270861,9606.ENSP00000300035,9606.ENSP00000300093,9606.ENSP00000355966,9606.ENSP00000360944,9606.ENSP00000378699,9606.ENSP00000384792	AURKA,KIF11,SGOL1,PLK4,KIAA0101,PLK1,NEK2,STIL,CDK1,WDR62
GO:0034501	Protein localization to kinetochore	5	14	1.15	0.005	9606.ENSP00000303398,9606.ENSP00000313950,9606.ENSP00000335463,9606.ENSP00000358813,9606.ENSP00000378699	MTBP,AURKB,CASC5,TTK,CDK1
GO:0090266	Regulation of mitotic cell cycle spindle assembly checkpoint	5	14	1.15	0.005	9606.ENSP00000256442,9606.ENSP00000261597,9606.ENSP00000296509,9606.ENSP00000301019,9606.ENSP00000318977	CCNB1,NDC80,MAD2L1,CDT1,GEN1
GO:0009059	Macromolecule biosynthetic process	67	1643	0.21	0.0055	9606.ENSP00000166345,9606.ENSP00000209728,9606.ENSP00000216122,9606.ENSP00000219097,9606.ENSP00000221486,9606.ENSP00000242208,9606.ENSP00000256442,9606.ENSP00000258729,9606.ENSP00000259008,9606.ENSP00000260102,9606.ENSP00000262105,9606.ENSP00000262643,9606.ENSP00000264233,9606.ENSP00000265056,9606.ENSP00000265728,9606.ENSP00000296277,9606.ENSP00000300035,9606.ENSP00000301019,9606.ENSP00000301634,…	TRIP13,CDC6,MCM5,ORC6,RNASEH2A,INHBA,CCNB1,IGF2BP3,BRIP1,MRPL15,MCM4,CCNE1,POLQ,MCM2,DBF4,RPL39L,KIAA0101,CDT1,TK1,FEN1,MRPL13,MCM7,RMI2,CLSPN,TYMS,GEN1,DSCC1,PIF1,LIN9,EIF4EBP1,ETV7,E2F1,HIST1H4J,BLM,RRM2,WDHD1,ILF2,E2F2,EXO1,EPRS,CENPF,DTL,LMO4,MRPL14,EXTL1,HIST1H4H,HIST1H4C,PCNA,ISG15,SDC1,RAD51,RFC4,PTTG1,CDK1,MUC16,MRPS12,TONSL,NCAPG2,ACAN,CDC7,HMGA1,CDC45,MCM10,CCNE2,MUC5B,MCM3,RECQL4
GO:0031324	Negative regulation of cellular metabolic process	97	2630	0.17	0.0055	9606.ENSP00000209728,9606.ENSP00000215754,9606.ENSP00000216127,9606.ENSP00000218230,9606.ENSP00000229239,9606.ENSP00000230321,9606.ENSP00000234392,9606.ENSP00000242208,9606.ENSP00000244534,9606.ENSP00000244573,9606.ENSP00000244745,9606.ENSP00000256442,9606.ENSP00000258729,9606.ENSP00000262300,9606.ENSP00000262643,9606.ENSP00000263946,9606.ENSP00000264233,9606.ENSP00000265340,9606.ENSP00000271638,…	CDC6,MIF,RASD2,PCSK1N,GAPDH,MDFI,VAX2,INHBA,HIST1H1D,HIST1H1A,SOX4,CCNB1,IGF2BP3,PKMYT1,CCNE1,PKP1,POLQ,PITX1,S100A11,SAMSN1,CSTB,S100A1,SOX8,EN1,H2AFZ,HMGB2,MAD2L1,A2ML1,PLK1,BIRC5,CST1,MRPL13,HIST1H1E,CBX2,PPP1R14B,RMI2,AURKB,TYMS,EZH2,CALR,SOX11,E2F7,PIF1,HIST1H1B,HIST2H2AB,HIST2H3D,CASC5,BCL11A,PLAUR,HIST1H1C,EIF4EBP1,HIST1H2AD,ETV7,FOXM1,IFI6,E2F1,HIST1H4J,BLM,RBM38,HIST1H2AI,HIST1H2AG,HIST1…
GO:0032506	Cytokinetic process	7	37	0.88	0.0056	9606.ENSP00000260363,9606.ENSP00000265748,9606.ENSP00000297265,9606.ENSP00000313950,9606.ENSP00000360540,9606.ENSP00000378356,9606.ENSP00000404190	KIF23,ANLN,CHMP4C,AURKB,CEP55,KIF20A,RACGAP1
GO:0048232	Male gamete generation	30	543	0.34	0.0056	9606.ENSP00000005995,9606.ENSP00000166345,9606.ENSP00000184183,9606.ENSP00000244573,9606.ENSP00000256442,9606.ENSP00000259008,9606.ENSP00000263181,9606.ENSP00000263382,9606.ENSP00000293894,9606.ENSP00000295746,9606.ENSP00000296277,9606.ENSP00000296484,9606.ENSP00000296503,9606.ENSP00000320866,9606.ENSP00000335463,9606.ENSP00000345571,9606.ENSP00000350162,9606.ENSP00000355167,9606.ENSP00000356379,…	PRSS21,TRIP13,ROPN1,HIST1H1A,CCNB1,BRIP1,KIF18A,ASF1B,SOX8,KIAA1524,RPL39L,POC1A,HMGB2,CALR,CASC5,E2F1,SYCP2,HORMAD1,ASPM,TDRKH,SRPK1,PRDX4,FANCA,PTTG1,KIFC1,RACGAP1,ROPN1B,MYBL1,H2AFX,PAFAH1B3
GO:0051716	Cellular response to stimulus	204	6489	0.1	0.0056	9606.ENSP00000160827,9606.ENSP00000166345,9606.ENSP00000209728,9606.ENSP00000215754,9606.ENSP00000216122,9606.ENSP00000216127,9606.ENSP00000216911,9606.ENSP00000217026,9606.ENSP00000218230,9606.ENSP00000220751,9606.ENSP00000221486,9606.ENSP00000222598,9606.ENSP00000228843,9606.ENSP00000229239,9606.ENSP00000234392,9606.ENSP00000242208,9606.ENSP00000244745,9606.ENSP00000246515,9606.ENSP00000247191,…	KIF22,TRIP13,CDC6,MIF,MCM5,RASD2,AURKA,MYBL2,PCSK1N,RIPK2,RNASEH2A,DLX5,RAD51AP1,GAPDH,VAX2,INHBA,SOX4,SLURP1,DLGAP5,CHRM3,CHI3L1,CCNB1,BRIP1,MRPL15,LMNB1,MCM4,IL12RB2,CCNE1,PRDX1,BPI,KIF18A,EPCAM,PKP1,POLQ,CD80,NEIL3,MCM2,GAL,BCL2A1,CPNE7,IMPA2,S100A11,ATP6V1C2,CCNA2,CDCA5,DSC2,SLAMF8,S100A1,AQP5,PRSS33,SOX8,H2AFZ,HMGB2,RAD21,MELK,CRABP1,KIAA0101,PLK1,NOD2,SLC39A4,BIRC5,CLEC7A,LRP8,CDC25A,FAM83B…
GO:0090169	Regulation of spindle assembly	6	25	0.98	0.0058	9606.ENSP00000297265,9606.ENSP00000300093,9606.ENSP00000323300,9606.ENSP00000337691,9606.ENSP00000362937,9606.ENSP00000385510	CHMP4C,PLK1,SPAG5,MAPK15,RCC1,GPSM2
GO:0008283	Cell population proliferation	28	493	0.35	0.006	9606.ENSP00000220751,9606.ENSP00000222598,9606.ENSP00000244745,9606.ENSP00000262746,9606.ENSP00000298048,9606.ENSP00000302530,9606.ENSP00000303706,9606.ENSP00000304078,9606.ENSP00000307288,9606.ENSP00000311083,9606.ENSP00000313950,9606.ENSP00000321656,9606.ENSP00000322568,9606.ENSP00000326550,9606.ENSP00000354394,9606.ENSP00000356319,9606.ENSP00000356379,9606.ENSP00000357643,9606.ENSP00000364976,…	RIPK2,DLX5,SOX4,PRDX1,MELK,BUB1,CDC25A,FAM83B,MCM7,CKS1B,AURKB,CDC25C,SOX11,TACC3,STAT1,KIF14,ASPM,MKI67,CKS2,FOXC1,HELLS,CDK1,NCAPG2,RACGAP1,MCM10,KIF1A,E2F8,FAM83D
GO:0044093	Positive regulation of molecular function	73	1842	0.2	0.006	9606.ENSP00000209728,9606.ENSP00000215754,9606.ENSP00000220751,9606.ENSP00000233893,9606.ENSP00000240423,9606.ENSP00000255409,9606.ENSP00000256442,9606.ENSP00000259938,9606.ENSP00000264552,9606.ENSP00000265148,9606.ENSP00000265643,9606.ENSP00000265728,9606.ENSP00000292169,9606.ENSP00000296503,9606.ENSP00000300093,9606.ENSP00000300403,9606.ENSP00000300589,9606.ENSP00000301019,9606.ENSP00000302569,…	CDC6,MIF,RIPK2,HSPE1,NCAPH,CHI3L1,CCNB1,CLPS,UBE2S,CENPE,GAL,DBF4,S100A1,HMGB2,PLK1,TPX2,NOD2,CDT1,CLEC7A,LRP8,CKS1B,CLSPN,AURKB,EZH2,DSCC1,PMAIP1,CTHRC1,EPHB3,NME1,MAPK15,PLAUR,FN1,UBE2C,IQGAP3,ARHGAP11A,KIAA1804,NEK2,KIF14,RGS1,EFNA3,RGS10,FCGR1A,PSRC1,IRAK1,LMO4,MMP9,CDC20,EDN2,RTKN2,CLPSL1,DKK1,BAMBI,MAGED1,CKS2,PCNA,FOXC1,RFC4,MST4,INCENP,CDK1,CXCR4,NCAPG2,RANBP1,RACGAP1,CLDN4,STMN1,DEPDC1,C…
GO:0044703	Multi-organism reproductive process	45	971	0.27	0.006	9606.ENSP00000005995,9606.ENSP00000166345,9606.ENSP00000184183,9606.ENSP00000216911,9606.ENSP00000240423,9606.ENSP00000244573,9606.ENSP00000256442,9606.ENSP00000259008,9606.ENSP00000263181,9606.ENSP00000263382,9606.ENSP00000280326,9606.ENSP00000293894,9606.ENSP00000295688,9606.ENSP00000295746,9606.ENSP00000296277,9606.ENSP00000296484,9606.ENSP00000296503,9606.ENSP00000300093,9606.ENSP00000320866,…	PRSS21,TRIP13,ROPN1,AURKA,NCAPH,HIST1H1A,CCNB1,BRIP1,KIF18A,ASF1B,CCT5,SOX8,CCT3,KIAA1524,RPL39L,POC1A,HMGB2,PLK1,CALR,CASC5,E2F1,SYCP2,HORMAD1,ASPM,TDRKH,TTK,MMP9,SRPK1,PRDX4,FOXC1,GJB2,FANCA,PTTG1,SPP1,CDK1,KIFC1,RACGAP1,CLDN4,TOP2A,SLC2A1,ROPN1B,MYBL1,IDO1,H2AFX,PAFAH1B3
GO:0045892	Negative regulation of transcription, dna-templated	55	1273	0.24	0.006	9606.ENSP00000230321,9606.ENSP00000234392,9606.ENSP00000244534,9606.ENSP00000262643,9606.ENSP00000265340,9606.ENSP00000292169,9606.ENSP00000293894,9606.ENSP00000295206,9606.ENSP00000296417,9606.ENSP00000296503,9606.ENSP00000300093,9606.ENSP00000301633,9606.ENSP00000307705,9606.ENSP00000308750,9606.ENSP00000313950,9606.ENSP00000320147,9606.ENSP00000320866,9606.ENSP00000322568,9606.ENSP00000323246,…	MDFI,VAX2,HIST1H1D,CCNE1,PITX1,S100A1,SOX8,EN1,H2AFZ,HMGB2,PLK1,BIRC5,HIST1H1E,CBX2,AURKB,EZH2,CALR,SOX11,E2F7,HIST1H1B,HIST2H2AB,HIST2H3D,BCL11A,HIST1H1C,HIST1H2AD,ETV7,FOXM1,E2F1,HIST1H4J,HIST1H2AI,HIST1H2AG,HIST1H3J,STAT1,E2F2,HIST3H2A,CENPF,HDGF,HIST2H3C,HIST2H2AA,DKK1,MAGED1,HIST1H4H,HIST1H3D,HIST1H4C,PCNA,FOXC1,HELLS,HIST2H3A,HMGA1,DEPDC1,CDKN2A,H2AFX,PRAME,VEGFA,E2F8
GO:1901360	Organic cyclic compound metabolic process	111	3118	0.15	0.006	9606.ENSP00000160827,9606.ENSP00000166345,9606.ENSP00000209728,9606.ENSP00000216122,9606.ENSP00000219097,9606.ENSP00000221486,9606.ENSP00000228843,9606.ENSP00000229239,9606.ENSP00000229270,9606.ENSP00000230431,9606.ENSP00000240488,9606.ENSP00000242776,9606.ENSP00000256442,9606.ENSP00000259008,9606.ENSP00000260118,9606.ENSP00000262105,9606.ENSP00000262643,9606.ENSP00000264233,9606.ENSP00000264596,…	KIF22,TRIP13,CDC6,MCM5,ORC6,RNASEH2A,RAD51AP1,GAPDH,TPI1,DNPH1,MND1,DDX39A,CCNB1,BRIP1,GGH,MCM4,CCNE1,POLQ,NEIL3,MCM2,SQLE,CDCA5,HMGB2,RAD21,DCAF13,KIAA0101,TK1,FEN1,MCM7,RMI2,FANCI,CLSPN,EXOSC4,TYMS,CYC1,GEN1,EZH2,DCTPP1,APOBEC3B,PIF1,LIN9,IDH2,NME1,ETV7,FOXM1,E2F1,HIST1H4J,BLM,DHCR7,RBM38,LAGE3,RRM2,WDHD1,PNP,ILF2,HORMAD1,E2F2,EXO1,HIST3H2A,EPRS,CENPF,DTL,UBE2T,TDRKH,SLC16A10,HMGB3,LMO4,RAD54L,…
GO:0010032	Meiotic chromosome condensation	4	7	1.36	0.0063	9606.ENSP00000240423,9606.ENSP00000325017,9606.ENSP00000349961,9606.ENSP00000378295	NCAPH,NCAPD2,SMC4,INCENP
GO:0032466	Negative regulation of cytokinesis	4	7	1.36	0.0063	9606.ENSP00000297265,9606.ENSP00000313950,9606.ENSP00000323246,9606.ENSP00000481103	CHMP4C,AURKB,E2F7,E2F8
GO:0045934	Negative regulation of nucleobase-containing compound metabolic process	63	1528	0.21	0.0065	9606.ENSP00000230321,9606.ENSP00000234392,9606.ENSP00000244534,9606.ENSP00000244573,9606.ENSP00000262643,9606.ENSP00000263946,9606.ENSP00000264233,9606.ENSP00000265340,9606.ENSP00000292169,9606.ENSP00000293894,9606.ENSP00000295206,9606.ENSP00000296417,9606.ENSP00000296503,9606.ENSP00000300093,9606.ENSP00000301633,9606.ENSP00000307705,9606.ENSP00000308750,9606.ENSP00000310356,9606.ENSP00000313950,…	MDFI,VAX2,HIST1H1D,HIST1H1A,CCNE1,PKP1,POLQ,PITX1,S100A1,SOX8,EN1,H2AFZ,HMGB2,PLK1,BIRC5,HIST1H1E,CBX2,RMI2,AURKB,EZH2,CALR,SOX11,E2F7,PIF1,HIST1H1B,HIST2H2AB,HIST2H3D,BCL11A,HIST1H1C,HIST1H2AD,ETV7,FOXM1,E2F1,HIST1H4J,BLM,RBM38,HIST1H2AI,HIST1H2AG,HIST1H3J,STAT1,E2F2,HIST3H2A,CENPF,HDGF,HIST2H3C,HIST2H2AA,DKK1,MAGED1,HIST1H4H,HIST1H3D,HIST1H4C,PCNA,FOXC1,HELLS,HIST2H3A,TONSL,HMGA1,DEPDC1,CDKN2A,…
GO:0051704	Multi-organism process	47	1036	0.26	0.0067	9606.ENSP00000005995,9606.ENSP00000166345,9606.ENSP00000184183,9606.ENSP00000216911,9606.ENSP00000240423,9606.ENSP00000244573,9606.ENSP00000256442,9606.ENSP00000259008,9606.ENSP00000263181,9606.ENSP00000263382,9606.ENSP00000280326,9606.ENSP00000293894,9606.ENSP00000295688,9606.ENSP00000295746,9606.ENSP00000296277,9606.ENSP00000296484,9606.ENSP00000296503,9606.ENSP00000300093,9606.ENSP00000320866,…	PRSS21,TRIP13,ROPN1,AURKA,NCAPH,HIST1H1A,CCNB1,BRIP1,KIF18A,ASF1B,CCT5,SOX8,CCT3,KIAA1524,RPL39L,POC1A,HMGB2,PLK1,CALR,CASC5,E2F1,SYCP2,HORMAD1,ASPM,TDRKH,TTK,MMP9,SRPK1,PRDX4,FOXC1,GJB2,FANCA,PTTG1,SPP1,CDK1,CXCR4,KIFC1,RACGAP1,CLDN4,TOP2A,SLC2A1,ROPN1B,MYBL1,IDO1,H2AFX,KPNA2,PAFAH1B3
GO:1904666	Regulation of ubiquitin protein ligase activity	6	26	0.96	0.0067	9606.ENSP00000264552,9606.ENSP00000296509,9606.ENSP00000300093,9606.ENSP00000348838,9606.ENSP00000361540,9606.ENSP00000418915	UBE2S,MAD2L1,PLK1,UBE2C,CDC20,CDKN2A
GO:0022412	Cellular process involved in reproduction in multicellular organism	22	345	0.4	0.007	9606.ENSP00000166345,9606.ENSP00000184183,9606.ENSP00000216911,9606.ENSP00000240423,9606.ENSP00000242208,9606.ENSP00000256442,9606.ENSP00000259008,9606.ENSP00000263181,9606.ENSP00000296503,9606.ENSP00000300093,9606.ENSP00000335463,9606.ENSP00000350162,9606.ENSP00000355167,9606.ENSP00000356379,9606.ENSP00000357812,9606.ENSP00000358813,9606.ENSP00000362931,9606.ENSP00000370256,9606.ENSP00000373952,…	TRIP13,ROPN1,AURKA,NCAPH,INHBA,CCNB1,BRIP1,KIF18A,HMGB2,PLK1,CASC5,SYCP2,HORMAD1,ASPM,TDRKH,TTK,SRPK1,FOXC1,FANCA,TOP2A,ROPN1B,MYBL1
GO:0044237	Cellular metabolic process	230	7513	0.09	0.0071	9606.ENSP00000005286,9606.ENSP00000160827,9606.ENSP00000166345,9606.ENSP00000209728,9606.ENSP00000215754,9606.ENSP00000216122,9606.ENSP00000216911,9606.ENSP00000218230,9606.ENSP00000219097,9606.ENSP00000220751,9606.ENSP00000221486,9606.ENSP00000228843,9606.ENSP00000229239,9606.ENSP00000229270,9606.ENSP00000230431,9606.ENSP00000240285,9606.ENSP00000240488,9606.ENSP00000242208,9606.ENSP00000242776,…	TMEM132A,KIF22,TRIP13,CDC6,MIF,MCM5,AURKA,PCSK1N,ORC6,RIPK2,RNASEH2A,RAD51AP1,GAPDH,TPI1,DNPH1,RDH10,MND1,INHBA,DDX39A,HIST1H1D,CHRM3,CCNB1,IGF2BP3,BRIP1,CLPS,MRPL15,GGH,MMP13,LYZ,MCM4,PKMYT1,IL12RB2,CCNE1,PRDX1,POLQ,UBE2S,NEIL3,HRASLS,MCM2,DBF4,SQLE,CPNE7,IMPA2,PLK4,CCNA2,CDCA5,NDUFB9,FADS2,GLYATL2,BUB1B,HIST1H2BD,RPL39L,HMGB2,MAD2L1,CHMP4C,RAD21,DCAF13,MELK,CRABP1,KIAA0101,PLK1,NOD2,CDT1,BIRC5,…
GO:0016584	Nucleosome positioning	5	16	1.09	0.0076	9606.ENSP00000244534,9606.ENSP00000244573,9606.ENSP00000307705,9606.ENSP00000330074,9606.ENSP00000339566	HIST1H1D,HIST1H1A,HIST1H1E,HIST1H1B,HIST1H1C
GO:0034641	Cellular nitrogen compound metabolic process	115	3282	0.14	0.0078	9606.ENSP00000160827,9606.ENSP00000166345,9606.ENSP00000209728,9606.ENSP00000216122,9606.ENSP00000218230,9606.ENSP00000219097,9606.ENSP00000221486,9606.ENSP00000228843,9606.ENSP00000229239,9606.ENSP00000229270,9606.ENSP00000230431,9606.ENSP00000240488,9606.ENSP00000242776,9606.ENSP00000256442,9606.ENSP00000258729,9606.ENSP00000259008,9606.ENSP00000260102,9606.ENSP00000260118,9606.ENSP00000262105,…	KIF22,TRIP13,CDC6,MCM5,PCSK1N,ORC6,RNASEH2A,RAD51AP1,GAPDH,TPI1,DNPH1,MND1,DDX39A,CCNB1,IGF2BP3,BRIP1,MRPL15,GGH,MCM4,CCNE1,POLQ,NEIL3,HRASLS,MCM2,CDCA5,RPL39L,HMGB2,RAD21,DCAF13,KIAA0101,TK1,FEN1,MRPL13,MCM7,RMI2,FANCI,CLSPN,EXOSC4,TYMS,CYC1,GEN1,EZH2,DCTPP1,APOBEC3B,PIF1,LIN9,IDH2,GSTA1,NME1,EIF4EBP1,ETV7,FOXM1,E2F1,HIST1H4J,BLM,RBM38,LAGE3,RRM2,WDHD1,PNP,ILF2,HORMAD1,E2F2,EXO1,HIST3H2A,EPRS,CE…
GO:0010971	Positive regulation of g2/m transition of mitotic cell cycle	6	27	0.95	0.0079	9606.ENSP00000256442,9606.ENSP00000303706,9606.ENSP00000321656,9606.ENSP00000355958,9606.ENSP00000378699,9606.ENSP00000393139	CCNB1,CDC25A,CDC25C,DTL,CDK1,CDC7
GO:2000573	Positive regulation of dna biosynthetic process	9	70	0.71	0.0079	9606.ENSP00000280326,9606.ENSP00000295688,9606.ENSP00000313950,9606.ENSP00000322180,9606.ENSP00000337691,9606.ENSP00000355966,9606.ENSP00000368458,9606.ENSP00000376272,9606.ENSP00000478570	CCT5,CCT3,AURKB,DSCC1,MAPK15,NEK2,PCNA,RFC4,VEGFA
GO:0019953	Sexual reproduction	39	810	0.28	0.008	9606.ENSP00000005995,9606.ENSP00000166345,9606.ENSP00000184183,9606.ENSP00000216911,9606.ENSP00000240423,9606.ENSP00000244573,9606.ENSP00000256442,9606.ENSP00000259008,9606.ENSP00000263181,9606.ENSP00000263382,9606.ENSP00000280326,9606.ENSP00000293894,9606.ENSP00000295688,9606.ENSP00000295746,9606.ENSP00000296277,9606.ENSP00000296484,9606.ENSP00000296503,9606.ENSP00000300093,9606.ENSP00000320866,…	PRSS21,TRIP13,ROPN1,AURKA,NCAPH,HIST1H1A,CCNB1,BRIP1,KIF18A,ASF1B,CCT5,SOX8,CCT3,KIAA1524,RPL39L,POC1A,HMGB2,PLK1,CALR,CASC5,E2F1,SYCP2,HORMAD1,ASPM,TDRKH,TTK,SRPK1,PRDX4,FOXC1,FANCA,PTTG1,CDK1,KIFC1,RACGAP1,TOP2A,ROPN1B,MYBL1,H2AFX,PAFAH1B3
GO:0032467	Positive regulation of cytokinesis	7	40	0.84	0.0081	9606.ENSP00000209728,9606.ENSP00000260363,9606.ENSP00000313950,9606.ENSP00000356319,9606.ENSP00000376306,9606.ENSP00000376753,9606.ENSP00000404190	CDC6,KIF23,AURKB,KIF14,CIT,GIPC1,RACGAP1
GO:0045740	Positive regulation of dna replication	7	40	0.84	0.0081	9606.ENSP00000265728,9606.ENSP00000301019,9606.ENSP00000323246,9606.ENSP00000368458,9606.ENSP00000378699,9606.ENSP00000393139,9606.ENSP00000481103	DBF4,CDT1,E2F7,PCNA,CDK1,CDC7,E2F8
GO:0044419	Interspecies interaction between organisms	74	1899	0.19	0.0083	9606.ENSP00000215754,9606.ENSP00000220751,9606.ENSP00000229239,9606.ENSP00000259938,9606.ENSP00000261267,9606.ENSP00000262345,9606.ENSP00000262428,9606.ENSP00000262746,9606.ENSP00000262865,9606.ENSP00000264246,9606.ENSP00000274026,9606.ENSP00000276708,9606.ENSP00000280326,9606.ENSP00000281453,9606.ENSP00000289707,9606.ENSP00000296503,9606.ENSP00000297265,9606.ENSP00000300589,9606.ENSP00000301653,…	MIF,RIPK2,GAPDH,CLPS,LYZ,IL12RB2,COTL1,PRDX1,BPI,CD80,CCNA2,GSDMC,CCT5,CENPU,SLAMF8,HMGB2,CHMP4C,NOD2,KRT16,BUB1,CLEC7A,CXCL10,CXCL8,CXCL11,PPP1R14B,TRIM59,EXOSC4,CDC25C,HIST1H2BC,MMP1,PMAIP1,APOBEC3B,AP1S1,CENPA,IFI6,E2F1,TAP1,FN1,RBM38,HIST1H2BK,STAT1,CXCL9,EPRS,RGS1,PVRL4,S100A14,S100A7,HIST2H2BE,FCGR1A,IRAK1,HMGB3,GBP5,LCN2,SRPK1,RCC1,UBD,PCNA,ISG15,GJB2,CDK1,IFI30,CXCR4,HTATIP2,HMGA1,RANBP1,…
GO:1903507	Negative regulation of nucleic acid-templated transcription	56	1324	0.23	0.0083	9606.ENSP00000230321,9606.ENSP00000234392,9606.ENSP00000244534,9606.ENSP00000262643,9606.ENSP00000265340,9606.ENSP00000292169,9606.ENSP00000293894,9606.ENSP00000295206,9606.ENSP00000296417,9606.ENSP00000296503,9606.ENSP00000300093,9606.ENSP00000301633,9606.ENSP00000307705,9606.ENSP00000308750,9606.ENSP00000313950,9606.ENSP00000320147,9606.ENSP00000320866,9606.ENSP00000322568,9606.ENSP00000323246,…	MDFI,VAX2,HIST1H1D,CCNE1,PITX1,S100A1,SOX8,EN1,H2AFZ,HMGB2,PLK1,BIRC5,HIST1H1E,CBX2,AURKB,EZH2,CALR,SOX11,E2F7,HIST1H1B,HIST2H2AB,HIST2H3D,BCL11A,HIST1H1C,HIST1H2AD,ETV7,FOXM1,E2F1,HIST1H4J,HIST1H2AI,HIST1H2AG,HIST1H3J,STAT1,E2F2,HIST3H2A,CENPF,HDGF,HIST2H3C,HIST2H2AA,DKK1,MAGED1,HIST1H4H,HIST1H3D,HIST1H4C,PCNA,FOXC1,HELLS,HIST2H3A,TONSL,HMGA1,DEPDC1,CDKN2A,H2AFX,PRAME,VEGFA,E2F8
GO:0000018	Regulation of dna recombination	11	106	0.62	0.0084	9606.ENSP00000228843,9606.ENSP00000244534,9606.ENSP00000244573,9606.ENSP00000264233,9606.ENSP00000307705,9606.ENSP00000310356,9606.ENSP00000330074,9606.ENSP00000339566,9606.ENSP00000347232,9606.ENSP00000372088,9606.ENSP00000438483	RAD51AP1,HIST1H1D,HIST1H1A,POLQ,HIST1H1E,RMI2,HIST1H1B,HIST1H1C,BLM,RAD51,KPNA2
GO:0051177	Meiotic sister chromatid cohesion	4	8	1.3	0.0087	9606.ENSP00000263753,9606.ENSP00000287598,9606.ENSP00000302530,9606.ENSP00000355167	SGOL1,BUB1B,BUB1,HORMAD1
GO:1901993	Regulation of meiotic cell cycle phase transition	4	8	1.3	0.0087	9606.ENSP00000303706,9606.ENSP00000321656,9606.ENSP00000337691,9606.ENSP00000358813	CDC25A,CDC25C,MAPK15,TTK
GO:0009892	Negative regulation of metabolic process	110	3124	0.15	0.0091	9606.ENSP00000209728,9606.ENSP00000215754,9606.ENSP00000216127,9606.ENSP00000216911,9606.ENSP00000218230,9606.ENSP00000229239,9606.ENSP00000230321,9606.ENSP00000234392,9606.ENSP00000242208,9606.ENSP00000244534,9606.ENSP00000244573,9606.ENSP00000244745,9606.ENSP00000256442,9606.ENSP00000258729,9606.ENSP00000259008,9606.ENSP00000262300,9606.ENSP00000262643,9606.ENSP00000262865,9606.ENSP00000263946,…	CDC6,MIF,RASD2,AURKA,PCSK1N,GAPDH,MDFI,VAX2,INHBA,HIST1H1D,HIST1H1A,SOX4,CCNB1,IGF2BP3,BRIP1,PKMYT1,CCNE1,BPI,PKP1,POLQ,PITX1,S100A11,SAMSN1,SLAMF8,CSTB,S100A1,SOX8,EN1,H2AFZ,HMGB2,MAD2L1,A2ML1,PLK1,BIRC5,CST1,MRPL13,HIST1H1E,CBX2,PPP1R14B,RMI2,AURKB,EXOSC4,TYMS,EZH2,CALR,SOX11,E2F7,PIF1,HIST1H1B,HIST2H2AB,HIST2H3D,CASC5,NME1,BCL11A,PLAUR,HIST1H1C,EIF4EBP1,HIST1H2AD,ETV7,FOXM1,IFI6,E2F1,FN1,HIST1…
GO:0051101	Regulation of dna binding	12	128	0.57	0.01	9606.ENSP00000230321,9606.ENSP00000275517,9606.ENSP00000296503,9606.ENSP00000301019,9606.ENSP00000322568,9606.ENSP00000337060,9606.ENSP00000339328,9606.ENSP00000345571,9606.ENSP00000355966,9606.ENSP00000361405,9606.ENSP00000370256,9606.ENSP00000414109	MDFI,CDCA5,HMGB2,CDT1,SOX11,NME1,PLAUR,E2F1,NEK2,MMP9,FOXC1,HJURP
GO:0098761	Cellular response to interleukin-7	7	42	0.82	0.0102	9606.ENSP00000333277,9606.ENSP00000352252,9606.ENSP00000357189,9606.ENSP00000358154,9606.ENSP00000366999,9606.ENSP00000376753,9606.ENSP00000385479	HIST2H3D,HIST1H3J,HDGF,HIST2H3C,HIST1H3D,GIPC1,HIST2H3A
GO:0010629	Negative regulation of gene expression	77	2014	0.18	0.0103	9606.ENSP00000215754,9606.ENSP00000216911,9606.ENSP00000229239,9606.ENSP00000230321,9606.ENSP00000234392,9606.ENSP00000242208,9606.ENSP00000244534,9606.ENSP00000256442,9606.ENSP00000258729,9606.ENSP00000259008,9606.ENSP00000262643,9606.ENSP00000262865,9606.ENSP00000265340,9606.ENSP00000292169,9606.ENSP00000293894,9606.ENSP00000295206,9606.ENSP00000296417,9606.ENSP00000296503,9606.ENSP00000300093,…	MIF,AURKA,GAPDH,MDFI,VAX2,INHBA,HIST1H1D,CCNB1,IGF2BP3,BRIP1,CCNE1,BPI,PITX1,S100A1,SOX8,EN1,H2AFZ,HMGB2,PLK1,BIRC5,MRPL13,HIST1H1E,CBX2,AURKB,EXOSC4,TYMS,EZH2,CALR,SOX11,E2F7,HIST1H1B,HIST2H2AB,HIST2H3D,NME1,BCL11A,HIST1H1C,EIF4EBP1,HIST1H2AD,ETV7,FOXM1,E2F1,FN1,HIST1H4J,HIST1H2AI,HIST1H2AG,HIST1H3J,STAT1,IQGAP3,E2F2,HIST3H2A,EPRS,CENPF,HDGF,TDRKH,HIST2H3C,HIST2H2AA,DKK1,MAGED1,HIST1H4H,HIST1H3D…
GO:0006271	DNA strand elongation involved in DNA replication	5	18	1.04	0.0113	9606.ENSP00000262105,9606.ENSP00000307288,9606.ENSP00000368458,9606.ENSP00000376272,9606.ENSP00000480987	MCM4,MCM7,PCNA,RFC4,MCM3
GO:0044380	Protein localization to cytoskeleton	7	43	0.81	0.0113	9606.ENSP00000216911,9606.ENSP00000265748,9606.ENSP00000323300,9606.ENSP00000358813,9606.ENSP00000360944,9606.ENSP00000373565,9606.ENSP00000481110	AURKA,ANLN,SPAG5,TTK,STIL,FAM83H,FAM83D
GO:0051707	Response to other organism	53	1256	0.22	0.0126	9606.ENSP00000215754,9606.ENSP00000220751,9606.ENSP00000229239,9606.ENSP00000259938,9606.ENSP00000261267,9606.ENSP00000262345,9606.ENSP00000262428,9606.ENSP00000262746,9606.ENSP00000262865,9606.ENSP00000264246,9606.ENSP00000276708,9606.ENSP00000280326,9606.ENSP00000289707,9606.ENSP00000296503,9606.ENSP00000300589,9606.ENSP00000301653,9606.ENSP00000302569,9606.ENSP00000305651,9606.ENSP00000306512,…	MIF,RIPK2,GAPDH,CLPS,LYZ,IL12RB2,COTL1,PRDX1,BPI,CD80,GSDMC,CCT5,SLAMF8,HMGB2,NOD2,KRT16,CLEC7A,CXCL10,CXCL8,CXCL11,PPP1R14B,TRIM59,EXOSC4,HIST1H2BC,PMAIP1,APOBEC3B,AP1S1,IFI6,HIST1H2BK,STAT1,CXCL9,EPRS,RGS1,S100A14,S100A7,HIST2H2BE,FCGR1A,IRAK1,HMGB3,GBP5,LCN2,SRPK1,UBD,ISG15,GJB2,IFI30,CXCR4,HMGA1,STMN1,OCIAD2,IDO1,CLEC5A,HIST1H2BJ
GO:0061844	Antimicrobial humoral immune response mediated by antimicrobial peptide	11	113	0.59	0.0132	9606.ENSP00000229239,9606.ENSP00000262865,9606.ENSP00000305651,9606.ENSP00000306512,9606.ENSP00000306884,9606.ENSP00000321744,9606.ENSP00000349430,9606.ENSP00000354901,9606.ENSP00000357712,9606.ENSP00000358151,9606.ENSP00000476136	GAPDH,BPI,CXCL10,CXCL8,CXCL11,HIST1H2BC,HIST1H2BK,CXCL9,S100A7,HIST2H2BE,HIST1H2BJ
GO:0045860	Positive regulation of protein kinase activity	29	550	0.32	0.0133	9606.ENSP00000209728,9606.ENSP00000215754,9606.ENSP00000220751,9606.ENSP00000255409,9606.ENSP00000256442,9606.ENSP00000265148,9606.ENSP00000265728,9606.ENSP00000300403,9606.ENSP00000300589,9606.ENSP00000303634,9606.ENSP00000311083,9606.ENSP00000312995,9606.ENSP00000320147,9606.ENSP00000354451,9606.ENSP00000355583,9606.ENSP00000356319,9606.ENSP00000358165,9606.ENSP00000358925,9606.ENSP00000358997,…	CDC6,MIF,RIPK2,CHI3L1,CCNB1,CENPE,DBF4,TPX2,NOD2,LRP8,CKS1B,CLSPN,EZH2,IQGAP3,KIAA1804,KIF14,FCGR1A,PSRC1,IRAK1,DKK1,MAGED1,CKS2,MST4,INCENP,CDK1,CXCR4,NCAPG2,PBK,VEGFA
GO:0016572	Histone phosphorylation	6	31	0.89	0.014	9606.ENSP00000216911,9606.ENSP00000256442,9606.ENSP00000274026,9606.ENSP00000313950,9606.ENSP00000378295,9606.ENSP00000378699	AURKA,CCNB1,CCNA2,AURKB,INCENP,CDK1
GO:0051253	Negative regulation of rna metabolic process	58	1422	0.21	0.0145	9606.ENSP00000230321,9606.ENSP00000234392,9606.ENSP00000244534,9606.ENSP00000262643,9606.ENSP00000263946,9606.ENSP00000265340,9606.ENSP00000292169,9606.ENSP00000293894,9606.ENSP00000295206,9606.ENSP00000296417,9606.ENSP00000296503,9606.ENSP00000300093,9606.ENSP00000301633,9606.ENSP00000307705,9606.ENSP00000308750,9606.ENSP00000313950,9606.ENSP00000320147,9606.ENSP00000320866,9606.ENSP00000322568,…	MDFI,VAX2,HIST1H1D,CCNE1,PKP1,PITX1,S100A1,SOX8,EN1,H2AFZ,HMGB2,PLK1,BIRC5,HIST1H1E,CBX2,AURKB,EZH2,CALR,SOX11,E2F7,HIST1H1B,HIST2H2AB,HIST2H3D,BCL11A,HIST1H1C,HIST1H2AD,ETV7,FOXM1,E2F1,HIST1H4J,RBM38,HIST1H2AI,HIST1H2AG,HIST1H3J,STAT1,E2F2,HIST3H2A,CENPF,HDGF,HIST2H3C,HIST2H2AA,DKK1,MAGED1,HIST1H4H,HIST1H3D,HIST1H4C,PCNA,FOXC1,HELLS,HIST2H3A,TONSL,HMGA1,DEPDC1,CDKN2A,H2AFX,PRAME,VEGFA,E2F8
GO:0000132	Establishment of mitotic spindle orientation	6	32	0.87	0.016	9606.ENSP00000261597,9606.ENSP00000296509,9606.ENSP00000300093,9606.ENSP00000336868,9606.ENSP00000385510,9606.ENSP00000386348	NDC80,MAD2L1,PLK1,CENPA,GPSM2,SAPCD2
GO:0006335	DNA replication-dependent nucleosome assembly	6	32	0.87	0.016	9606.ENSP00000263382,9606.ENSP00000347168,9606.ENSP00000352252,9606.ENSP00000366956,9606.ENSP00000366999,9606.ENSP00000367034	ASF1B,HIST1H4J,HIST1H3J,HIST1H4H,HIST1H3D,HIST1H4C
GO:0040020	Regulation of meiotic nuclear division	6	32	0.87	0.016	9606.ENSP00000166345,9606.ENSP00000320866,9606.ENSP00000337691,9606.ENSP00000355167,9606.ENSP00000358813,9606.ENSP00000361540	TRIP13,CALR,MAPK15,HORMAD1,TTK,CDC20
GO:0045815	Positive regulation of gene expression, epigenetic	8	62	0.71	0.0163	9606.ENSP00000244534,9606.ENSP00000244573,9606.ENSP00000287394,9606.ENSP00000307705,9606.ENSP00000330074,9606.ENSP00000337226,9606.ENSP00000339566,9606.ENSP00000399888	HIST1H1D,HIST1H1A,ATAD2,HIST1H1E,HIST1H1B,CDCA4,HIST1H1C,HMGA1
GO:0019730	Antimicrobial humoral response	13	160	0.51	0.0187	9606.ENSP00000229239,9606.ENSP00000261267,9606.ENSP00000262865,9606.ENSP00000305651,9606.ENSP00000306512,9606.ENSP00000306884,9606.ENSP00000321744,9606.ENSP00000349430,9606.ENSP00000354901,9606.ENSP00000357712,9606.ENSP00000358151,9606.ENSP00000362108,9606.ENSP00000476136	GAPDH,LYZ,BPI,CXCL10,CXCL8,CXCL11,HIST1H2BC,HIST1H2BK,CXCL9,S100A7,HIST2H2BE,LCN2,HIST1H2BJ
GO:0019221	Cytokine-mediated signaling pathway	33	678	0.29	0.0195	9606.ENSP00000215754,9606.ENSP00000220751,9606.ENSP00000261366,9606.ENSP00000262345,9606.ENSP00000264246,9606.ENSP00000300589,9606.ENSP00000301633,9606.ENSP00000303634,9606.ENSP00000305651,9606.ENSP00000306512,9606.ENSP00000306884,9606.ENSP00000322788,9606.ENSP00000333277,9606.ENSP00000342513,9606.ENSP00000346839,9606.ENSP00000352252,9606.ENSP00000354394,9606.ENSP00000354901,9606.ENSP00000358154,…	MIF,RIPK2,LMNB1,IL12RB2,CD80,NOD2,BIRC5,LRP8,CXCL10,CXCL8,CXCL11,MMP1,HIST2H3D,IFI6,FN1,HIST1H3J,STAT1,CXCL9,HIST2H3C,FCGR1A,IRAK1,MMP9,EDN2,LCN2,HIST1H3D,ISG15,FOXC1,SDC1,IFI30,HIST2H3A,CXCR4,LTB,VEGFA
GO:0045652	Regulation of megakaryocyte differentiation	9	82	0.64	0.0206	9606.ENSP00000296503,9606.ENSP00000333277,9606.ENSP00000347168,9606.ENSP00000352252,9606.ENSP00000358154,9606.ENSP00000366956,9606.ENSP00000366999,9606.ENSP00000367034,9606.ENSP00000385479	HMGB2,HIST2H3D,HIST1H4J,HIST1H3J,HIST2H3C,HIST1H4H,HIST1H3D,HIST1H4C,HIST2H3A
GO:0033674	Positive regulation of kinase activity	31	624	0.3	0.0209	9606.ENSP00000209728,9606.ENSP00000215754,9606.ENSP00000220751,9606.ENSP00000255409,9606.ENSP00000256442,9606.ENSP00000265148,9606.ENSP00000265728,9606.ENSP00000300403,9606.ENSP00000300589,9606.ENSP00000303634,9606.ENSP00000311083,9606.ENSP00000312995,9606.ENSP00000320147,9606.ENSP00000332118,9606.ENSP00000354451,9606.ENSP00000355583,9606.ENSP00000356319,9606.ENSP00000358165,9606.ENSP00000358925,…	CDC6,MIF,RIPK2,CHI3L1,CCNB1,CENPE,DBF4,TPX2,NOD2,LRP8,CKS1B,CLSPN,EZH2,EPHB3,IQGAP3,KIAA1804,KIF14,FCGR1A,PSRC1,IRAK1,LMO4,DKK1,MAGED1,CKS2,MST4,INCENP,CDK1,CXCR4,NCAPG2,PBK,VEGFA
GO:0071897	DNA biosynthetic process	10	101	0.6	0.0211	9606.ENSP00000264233,9606.ENSP00000300035,9606.ENSP00000301634,9606.ENSP00000315644,9606.ENSP00000329102,9606.ENSP00000355922,9606.ENSP00000355958,9606.ENSP00000368458,9606.ENSP00000368699,9606.ENSP00000376272	POLQ,KIAA0101,TK1,TYMS,LIN9,CENPF,DTL,PCNA,ISG15,RFC4
GO:0007063	Regulation of sister chromatid cohesion	5	22	0.96	0.0232	9606.ENSP00000257934,9606.ENSP00000275517,9606.ENSP00000297338,9606.ENSP00000302530,9606.ENSP00000305480	ESPL1,CDCA5,RAD21,BUB1,FEN1
GO:0006890	Retrograde vesicle-mediated transport, golgi to endoplasmic reticulum	9	84	0.63	0.0239	9606.ENSP00000160827,9606.ENSP00000260363,9606.ENSP00000260731,9606.ENSP00000263181,9606.ENSP00000265148,9606.ENSP00000324020,9606.ENSP00000361298,9606.ENSP00000363524,9606.ENSP00000404190	KIF22,KIF23,KIF11,KIF18A,CENPE,KIF15,KIF2C,KIF4A,RACGAP1
GO:1902975	Mitotic dna replication initiation	3	4	1.47	0.0245	9606.ENSP00000262105,9606.ENSP00000265056,9606.ENSP00000480987	MCM4,MCM2,MCM3
GO:2000241	Regulation of reproductive process	13	166	0.49	0.025	9606.ENSP00000166345,9606.ENSP00000216911,9606.ENSP00000242208,9606.ENSP00000303706,9606.ENSP00000320866,9606.ENSP00000321656,9606.ENSP00000337691,9606.ENSP00000355167,9606.ENSP00000356379,9606.ENSP00000358813,9606.ENSP00000361540,9606.ENSP00000368646,9606.ENSP00000478570	TRIP13,AURKA,INHBA,CDC25A,CALR,CDC25C,MAPK15,HORMAD1,ASPM,TTK,CDC20,PRDX4,VEGFA
GO:1902750	Negative regulation of cell cycle g2/m phase transition	10	104	0.58	0.0255	9606.ENSP00000209728,9606.ENSP00000216911,9606.ENSP00000297265,9606.ENSP00000297338,9606.ENSP00000300093,9606.ENSP00000312995,9606.ENSP00000313950,9606.ENSP00000347232,9606.ENSP00000355958,9606.ENSP00000378699	CDC6,AURKA,CHMP4C,RAD21,PLK1,CLSPN,AURKB,BLM,DTL,CDK1
GO:1901576	Organic substance biosynthetic process	96	2734	0.15	0.0259	9606.ENSP00000166345,9606.ENSP00000209728,9606.ENSP00000215754,9606.ENSP00000216122,9606.ENSP00000219097,9606.ENSP00000221486,9606.ENSP00000229239,9606.ENSP00000229270,9606.ENSP00000230431,9606.ENSP00000240285,9606.ENSP00000242208,9606.ENSP00000256442,9606.ENSP00000258729,9606.ENSP00000259008,9606.ENSP00000260102,9606.ENSP00000262105,9606.ENSP00000262643,9606.ENSP00000264233,9606.ENSP00000265056,…	TRIP13,CDC6,MIF,MCM5,ORC6,RNASEH2A,GAPDH,TPI1,DNPH1,RDH10,INHBA,CCNB1,IGF2BP3,BRIP1,MRPL15,MCM4,CCNE1,POLQ,MCM2,DBF4,SQLE,CPNE7,IMPA2,FADS2,RPL39L,KIAA0101,CDT1,TK1,FEN1,MRPL13,MCM7,RMI2,CLSPN,TYMS,CYC1,GEN1,DSCC1,DCTPP1,PIF1,LIN9,IDH2,GSTA1,NME1,EIF4EBP1,ETV7,E2F1,PLCH1,HIST1H4J,BLM,DHCR7,RRM2,WDHD1,PNP,ILF2,E2F2,EXO1,EPRS,CENPF,DTL,PHGDH,LMO4,MRPL14,EDN2,EXTL1,PSAT1,SLC25A39,HIST1H4H,HIST1H4C,P…
GO:0007077	Mitotic nuclear envelope disassembly	4	12	1.12	0.026	9606.ENSP00000256442,9606.ENSP00000288207,9606.ENSP00000300093,9606.ENSP00000378699	CCNB1,CCNB2,PLK1,CDK1
GO:0048513	Animal organ development	109	3197	0.13	0.0284	9606.ENSP00000209718,9606.ENSP00000216911,9606.ENSP00000222598,9606.ENSP00000230321,9606.ENSP00000234392,9606.ENSP00000240285,9606.ENSP00000242208,9606.ENSP00000244745,9606.ENSP00000252252,9606.ENSP00000255409,9606.ENSP00000256442,9606.ENSP00000259008,9606.ENSP00000260302,9606.ENSP00000263181,9606.ENSP00000263735,9606.ENSP00000263946,9606.ENSP00000265056,9606.ENSP00000265340,9606.ENSP00000265748,…	KRT23,AURKA,DLX5,MDFI,VAX2,RDH10,INHBA,SOX4,KRT6B,CHI3L1,CCNB1,BRIP1,MMP13,KIF18A,EPCAM,PKP1,MCM2,PITX1,ANLN,BCL2A1,PLK4,CCNA2,ST14,DSC2,OTX1,CCNB2,SLAMF8,S100A1,AQP5,SOX8,EN1,POC1A,HMGB2,MELK,KRT16,LRP8,CXCL10,CXCL8,TYMS,EZH2,CALR,SOX11,E2F7,TACC3,HIST1H1B,CTHRC1,EPHB3,NME1,EIF4EBP1,COL9A3,ETV7,E2F1,FN1,DHCR7,SYCP2,STAT1,CENPF,KIF14,ASPM,S100A7,PHGDH,COL11A1,LMO4,STIL,MMP9,EDN2,RTKN2,DKK1,MFAP2,…
GO:0007283	Spermatogenesis	27	525	0.31	0.0285	9606.ENSP00000005995,9606.ENSP00000166345,9606.ENSP00000184183,9606.ENSP00000244573,9606.ENSP00000256442,9606.ENSP00000259008,9606.ENSP00000263382,9606.ENSP00000293894,9606.ENSP00000295746,9606.ENSP00000296277,9606.ENSP00000296484,9606.ENSP00000296503,9606.ENSP00000320866,9606.ENSP00000335463,9606.ENSP00000345571,9606.ENSP00000355167,9606.ENSP00000356379,9606.ENSP00000357812,9606.ENSP00000362931,…	PRSS21,TRIP13,ROPN1,HIST1H1A,CCNB1,BRIP1,ASF1B,SOX8,KIAA1524,RPL39L,POC1A,HMGB2,CALR,CASC5,E2F1,HORMAD1,ASPM,TDRKH,SRPK1,PRDX4,PTTG1,KIFC1,RACGAP1,ROPN1B,MYBL1,H2AFX,PAFAH1B3
GO:0007131	Reciprocal meiotic recombination	7	53	0.72	0.0321	9606.ENSP00000166345,9606.ENSP00000240488,9606.ENSP00000259008,9606.ENSP00000297338,9606.ENSP00000361043,9606.ENSP00000372088,9606.ENSP00000411532	TRIP13,MND1,BRIP1,RAD21,RAD54L,RAD51,TOP2A
GO:0035295	Tube development	38	851	0.25	0.0333	9606.ENSP00000240285,9606.ENSP00000244745,9606.ENSP00000255409,9606.ENSP00000256442,9606.ENSP00000259008,9606.ENSP00000263181,9606.ENSP00000263735,9606.ENSP00000278742,9606.ENSP00000293894,9606.ENSP00000295206,9606.ENSP00000306512,9606.ENSP00000315644,9606.ENSP00000322568,9606.ENSP00000323246,9606.ENSP00000330523,9606.ENSP00000332118,9606.ENSP00000340691,9606.ENSP00000342307,9606.ENSP00000346839,…	RDH10,SOX4,CHI3L1,CCNB1,BRIP1,KIF18A,EPCAM,ST14,SOX8,EN1,CXCL8,TYMS,SOX11,E2F7,CTHRC1,EPHB3,EIF4EBP1,FOXM1,FN1,DHCR7,STAT1,S100A7,PHGDH,LMO4,STIL,EDN2,AARD,FOXC1,SDC1,ESM1,GJB2,TYMP,KIF26B,CXCR4,HTATIP2,MTHFD1L,VEGFA,E2F8
GO:0022411	Cellular component disassembly	22	395	0.35	0.0337	9606.ENSP00000215743,9606.ENSP00000256442,9606.ENSP00000260102,9606.ENSP00000260302,9606.ENSP00000263181,9606.ENSP00000288207,9606.ENSP00000296503,9606.ENSP00000300093,9606.ENSP00000306548,9606.ENSP00000322788,9606.ENSP00000355656,9606.ENSP00000361084,9606.ENSP00000361298,9606.ENSP00000361405,9606.ENSP00000363081,9606.ENSP00000378699,9606.ENSP00000384952,9606.ENSP00000399888,9606.ENSP00000410452,…	MMP11,CCNB1,MRPL15,MMP13,KIF18A,CCNB2,HMGB2,PLK1,MRPL13,MMP1,HIST3H2A,MRPL14,KIF2C,MMP9,DKK1,CDK1,MRPS12,HMGA1,STMN1,TOP2A,CDKN2A,KIF18B
GO:0032268	Regulation of cellular protein metabolic process	94	2693	0.14	0.0351	9606.ENSP00000184183,9606.ENSP00000209728,9606.ENSP00000215754,9606.ENSP00000216127,9606.ENSP00000216911,9606.ENSP00000218230,9606.ENSP00000220751,9606.ENSP00000229239,9606.ENSP00000233893,9606.ENSP00000242208,9606.ENSP00000244745,9606.ENSP00000247191,9606.ENSP00000255409,9606.ENSP00000256442,9606.ENSP00000257934,9606.ENSP00000258729,9606.ENSP00000262300,9606.ENSP00000262643,9606.ENSP00000262746,…	ROPN1,CDC6,MIF,RASD2,AURKA,PCSK1N,RIPK2,GAPDH,HSPE1,INHBA,SOX4,DLGAP5,CHI3L1,CCNB1,ESPL1,IGF2BP3,PKMYT1,CCNE1,PRDX1,CD80,UBE2S,CENPE,DBF4,CCNA2,SAMSN1,CCNB2,CSTB,MAD2L1,A2ML1,PLK1,TPX2,NOD2,BIRC5,CLEC7A,MTBP,LRP8,CDC25A,CXCL10,CST1,MRPL13,PPP1R14B,FANCI,CKS1B,CLSPN,TYMS,EZH2,CALR,CDC25C,PMAIP1,CDCA2,HIST1H1B,CDKN3,PLAUR,EIF4EBP1,FOXM1,IFI6,FN1,BLM,UBE2C,IQGAP3,PPP1R14C,KIAA1804,EPRS,KIF14,EFNA3,S…
GO:0000915	Actomyosin contractile ring assembly	3	5	1.38	0.0365	9606.ENSP00000260363,9606.ENSP00000265748,9606.ENSP00000404190	KIF23,ANLN,RACGAP1
GO:0016321	Female meiosis chromosome segregation	3	5	1.38	0.0365	9606.ENSP00000240423,9606.ENSP00000300093,9606.ENSP00000358813	NCAPH,PLK1,TTK
GO:0031536	Positive regulation of exit from mitosis	3	5	1.38	0.0365	9606.ENSP00000275517,9606.ENSP00000301633,9606.ENSP00000348838	CDCA5,BIRC5,UBE2C
GO:0061436	Establishment of skin barrier	5	25	0.9	0.0365	9606.ENSP00000301653,9606.ENSP00000384748,9606.ENSP00000409544,9606.ENSP00000410452,9606.ENSP00000480821	KRT16,TMEM79,CLDN4,STMN1,LSR
GO:1901995	Positive regulation of meiotic cell cycle phase transition	3	5	1.38	0.0365	9606.ENSP00000303706,9606.ENSP00000321656,9606.ENSP00000337691	CDC25A,CDC25C,MAPK15
GO:1905832	Positive regulation of spindle assembly	3	5	1.38	0.0365	9606.ENSP00000323300,9606.ENSP00000337691,9606.ENSP00000385510	SPAG5,MAPK15,GPSM2
GO:0071902	Positive regulation of protein serine/threonine kinase activity	20	348	0.36	0.0393	9606.ENSP00000209728,9606.ENSP00000215754,9606.ENSP00000220751,9606.ENSP00000256442,9606.ENSP00000265728,9606.ENSP00000300589,9606.ENSP00000311083,9606.ENSP00000320147,9606.ENSP00000354451,9606.ENSP00000355583,9606.ENSP00000358925,9606.ENSP00000358997,9606.ENSP00000363081,9606.ENSP00000364847,9606.ENSP00000364976,9606.ENSP00000378295,9606.ENSP00000378699,9606.ENSP00000386884,9606.ENSP00000428489,…	CDC6,MIF,RIPK2,CCNB1,DBF4,NOD2,CKS1B,EZH2,IQGAP3,KIAA1804,PSRC1,IRAK1,DKK1,MAGED1,CKS2,INCENP,CDK1,CXCR4,PBK,VEGFA
GO:0060707	Trophoblast giant cell differentiation	4	14	1.06	0.0398	9606.ENSP00000230321,9606.ENSP00000270861,9606.ENSP00000323246,9606.ENSP00000481103	MDFI,PLK4,E2F7,E2F8
GO:1902101	Positive regulation of metaphase/anaphase transition of cell cycle	4	14	1.06	0.0398	9606.ENSP00000247191,9606.ENSP00000257934,9606.ENSP00000301019,9606.ENSP00000337691	DLGAP5,ESPL1,CDT1,MAPK15
GO:1904668	Positive regulation of ubiquitin protein ligase activity	4	14	1.06	0.0398	9606.ENSP00000264552,9606.ENSP00000300093,9606.ENSP00000348838,9606.ENSP00000361540	UBE2S,PLK1,UBE2C,CDC20
GO:0042325	Regulation of phosphorylation	62	1626	0.18	0.0419	9606.ENSP00000184183,9606.ENSP00000209728,9606.ENSP00000215754,9606.ENSP00000220751,9606.ENSP00000242208,9606.ENSP00000255409,9606.ENSP00000256442,9606.ENSP00000262300,9606.ENSP00000262643,9606.ENSP00000262746,9606.ENSP00000264246,9606.ENSP00000265148,9606.ENSP00000265728,9606.ENSP00000274026,9606.ENSP00000285670,9606.ENSP00000288207,9606.ENSP00000289707,9606.ENSP00000300093,9606.ENSP00000300403,…	ROPN1,CDC6,MIF,RIPK2,INHBA,CHI3L1,CCNB1,PKMYT1,CCNE1,PRDX1,CD80,CENPE,DBF4,CCNA2,SAMSN1,CCNB2,SLAMF8,PLK1,TPX2,NOD2,LRP8,CDC25A,CXCL10,MCM7,PPP1R14B,CKS1B,CLSPN,EZH2,CDC25C,EPHB3,CDKN3,PLAUR,FOXM1,FN1,BLM,IQGAP3,PPP1R14C,KIAA1804,KIF14,S100A7,FCGR1A,TTK,PSRC1,IRAK1,LMO4,MMP9,DKK1,MAGED1,CKS2,RAD51,MST4,INCENP,CDK1,CXCR4,NCAPG2,CDKN2A,ROPN1B,PBK,CCNE2,DBNDD1,VEGFA,FAM83D
GO:0044249	Cellular biosynthetic process	91	2611	0.14	0.0439	9606.ENSP00000166345,9606.ENSP00000209728,9606.ENSP00000215754,9606.ENSP00000216122,9606.ENSP00000219097,9606.ENSP00000221486,9606.ENSP00000229270,9606.ENSP00000230431,9606.ENSP00000240285,9606.ENSP00000242208,9606.ENSP00000256442,9606.ENSP00000258729,9606.ENSP00000259008,9606.ENSP00000260102,9606.ENSP00000262105,9606.ENSP00000262643,9606.ENSP00000264233,9606.ENSP00000265056,9606.ENSP00000265728,…	TRIP13,CDC6,MIF,MCM5,ORC6,RNASEH2A,TPI1,DNPH1,RDH10,INHBA,CCNB1,IGF2BP3,BRIP1,MRPL15,MCM4,CCNE1,POLQ,MCM2,DBF4,CPNE7,IMPA2,FADS2,RPL39L,KIAA0101,CDT1,TK1,FEN1,MRPL13,MCM7,RMI2,CLSPN,TYMS,CYC1,GEN1,DSCC1,DCTPP1,PIF1,LIN9,IDH2,GSTA1,NME1,EIF4EBP1,ETV7,E2F1,HIST1H4J,BLM,RRM2,WDHD1,PNP,ILF2,E2F2,EXO1,EPRS,CENPF,DTL,PHGDH,LMO4,MRPL14,EDN2,EXTL1,PSAT1,SLC25A39,HIST1H4H,HIST1H4C,PCNA,ISG15,GMDS,RAD51,RF…
GO:0010604	Positive regulation of macromolecule metabolic process	119	3600	0.12	0.0443	9606.ENSP00000209728,9606.ENSP00000215754,9606.ENSP00000216127,9606.ENSP00000216911,9606.ENSP00000217026,9606.ENSP00000220751,9606.ENSP00000222598,9606.ENSP00000229239,9606.ENSP00000233893,9606.ENSP00000242208,9606.ENSP00000244534,9606.ENSP00000244573,9606.ENSP00000244745,9606.ENSP00000247191,9606.ENSP00000255409,9606.ENSP00000256442,9606.ENSP00000257934,9606.ENSP00000262345,9606.ENSP00000262643,…	CDC6,MIF,RASD2,AURKA,MYBL2,RIPK2,DLX5,GAPDH,HSPE1,INHBA,HIST1H1D,HIST1H1A,SOX4,DLGAP5,CHI3L1,CCNB1,ESPL1,IL12RB2,CCNE1,EPCAM,PKP1,CD80,UBE2S,CENPE,PITX1,GAL,DBF4,CCNA2,CCT5,OTX1,ATAD2,SOX8,EN1,CCT3,H2AFZ,HMGB2,PLK1,TPX2,NOD2,CDT1,CLEC7A,LRP8,CXCL10,HIST1H1E,FANCI,CKS1B,CLSPN,AURKB,EZH2,CALR,DSCC1,SOX11,E2F7,PMAIP1,CDCA2,HIST1H1B,CDCA4,MAPK15,BCL11A,PLAUR,HIST1H1C,FOXM1,E2F1,FN1,BLM,RBM38,UBE2C,LA…
GO:2000278	Regulation of dna biosynthetic process	10	114	0.54	0.0455	9606.ENSP00000280326,9606.ENSP00000295688,9606.ENSP00000313950,9606.ENSP00000322180,9606.ENSP00000328174,9606.ENSP00000337691,9606.ENSP00000355966,9606.ENSP00000368458,9606.ENSP00000376272,9606.ENSP00000478570	CCT5,CCT3,AURKB,DSCC1,PIF1,MAPK15,NEK2,PCNA,RFC4,VEGFA
GO:0098542	Defense response to other organism	39	900	0.24	0.0459	9606.ENSP00000215754,9606.ENSP00000220751,9606.ENSP00000229239,9606.ENSP00000261267,9606.ENSP00000262428,9606.ENSP00000262746,9606.ENSP00000262865,9606.ENSP00000276708,9606.ENSP00000289707,9606.ENSP00000296503,9606.ENSP00000300589,9606.ENSP00000301653,9606.ENSP00000302569,9606.ENSP00000305651,9606.ENSP00000310117,9606.ENSP00000311219,9606.ENSP00000315476,9606.ENSP00000321744,9606.ENSP00000326119,…	MIF,RIPK2,GAPDH,LYZ,COTL1,PRDX1,BPI,GSDMC,SLAMF8,HMGB2,NOD2,KRT16,CLEC7A,CXCL10,PPP1R14B,TRIM59,EXOSC4,HIST1H2BC,PMAIP1,APOBEC3B,IFI6,HIST1H2BK,STAT1,CXCL9,EPRS,S100A14,S100A7,HIST2H2BE,FCGR1A,IRAK1,HMGB3,GBP5,LCN2,SRPK1,UBD,ISG15,IFI30,CLEC5A,HIST1H2BJ
GO:0009893	Positive regulation of metabolic process	127	3893	0.11	0.0461	9606.ENSP00000209728,9606.ENSP00000215754,9606.ENSP00000216127,9606.ENSP00000216911,9606.ENSP00000217026,9606.ENSP00000220751,9606.ENSP00000222598,9606.ENSP00000229239,9606.ENSP00000233893,9606.ENSP00000240285,9606.ENSP00000242208,9606.ENSP00000244534,9606.ENSP00000244573,9606.ENSP00000244745,9606.ENSP00000247191,9606.ENSP00000255409,9606.ENSP00000256442,9606.ENSP00000257934,9606.ENSP00000262345,…	CDC6,MIF,RASD2,AURKA,MYBL2,RIPK2,DLX5,GAPDH,HSPE1,RDH10,INHBA,HIST1H1D,HIST1H1A,SOX4,DLGAP5,CHI3L1,CCNB1,ESPL1,IL12RB2,CCNE1,EPCAM,PKP1,CD80,UBE2S,CENPE,PITX1,GAL,DBF4,CCNA2,CCT5,OTX1,ATAD2,S100A1,SOX8,EN1,CCT3,H2AFZ,HMGB2,PLK1,TPX2,NOD2,CDT1,CLEC7A,LRP8,CXCL10,HIST1H1E,FANCI,CKS1B,CLSPN,AURKB,EZH2,CALR,DSCC1,SOX11,E2F7,PMAIP1,CDCA2,HIST1H1B,EPHB3,CDCA4,MAPK15,BCL11A,PLAUR,HIST1H1C,FOXM1,E2F1,FN1…
GO:0051493	Regulation of cytoskeleton organization	27	546	0.29	0.0464	9606.ENSP00000216911,9606.ENSP00000260731,9606.ENSP00000262428,9606.ENSP00000263181,9606.ENSP00000263867,9606.ENSP00000270861,9606.ENSP00000296484,9606.ENSP00000297265,9606.ENSP00000300093,9606.ENSP00000300403,9606.ENSP00000318977,9606.ENSP00000319417,9606.ENSP00000323300,9606.ENSP00000326550,9606.ENSP00000337691,9606.ENSP00000354451,9606.ENSP00000355966,9606.ENSP00000356989,9606.ENSP00000358925,…	AURKA,KIF11,COTL1,KIF18A,CAPG,PLK4,POC1A,CHMP4C,PLK1,TPX2,GEN1,SKA3,SPAG5,TACC3,MAPK15,IQGAP3,NEK2,PFDN2,PSRC1,STIL,RCC1,CKAP2,GPSM2,RANBP1,STMN1,SPTBN2,ENSG00000158164
GO:0010638	Positive regulation of organelle organization	30	633	0.28	0.0472	9606.ENSP00000216911,9606.ENSP00000247191,9606.ENSP00000256442,9606.ENSP00000257934,9606.ENSP00000270861,9606.ENSP00000275517,9606.ENSP00000280326,9606.ENSP00000295688,9606.ENSP00000296484,9606.ENSP00000297338,9606.ENSP00000301019,9606.ENSP00000301633,9606.ENSP00000305480,9606.ENSP00000313950,9606.ENSP00000323300,9606.ENSP00000326119,9606.ENSP00000330074,9606.ENSP00000337691,9606.ENSP00000339328,…	AURKA,DLGAP5,CCNB1,ESPL1,PLK4,CDCA5,CCT5,CCT3,POC1A,RAD21,CDT1,BIRC5,FEN1,AURKB,SPAG5,PMAIP1,HIST1H1B,MAPK15,PLAUR,E2F1,UBE2C,NEK2,PFDN2,PSRC1,MMP9,SDC1,GPSM2,RANBP1,NUSAP1,VEGFA
GO:0007064	Mitotic sister chromatid cohesion	4	15	1.03	0.0479	9606.ENSP00000263753,9606.ENSP00000275517,9606.ENSP00000322180,9606.ENSP00000361540	SGOL1,CDCA5,DSCC1,CDC20
GO:1905820	Positive regulation of chromosome separation	4	15	1.03	0.0479	9606.ENSP00000247191,9606.ENSP00000257934,9606.ENSP00000301019,9606.ENSP00000337691	DLGAP5,ESPL1,CDT1,MAPK15
GO:0031399	Regulation of protein modification process	69	1870	0.17	0.048	9606.ENSP00000184183,9606.ENSP00000209728,9606.ENSP00000215754,9606.ENSP00000216127,9606.ENSP00000220751,9606.ENSP00000242208,9606.ENSP00000244745,9606.ENSP00000255409,9606.ENSP00000256442,9606.ENSP00000262300,9606.ENSP00000262643,9606.ENSP00000262746,9606.ENSP00000264246,9606.ENSP00000264552,9606.ENSP00000265148,9606.ENSP00000265728,9606.ENSP00000274026,9606.ENSP00000285670,9606.ENSP00000288207,…	ROPN1,CDC6,MIF,RASD2,RIPK2,INHBA,SOX4,CHI3L1,CCNB1,PKMYT1,CCNE1,PRDX1,CD80,UBE2S,CENPE,DBF4,CCNA2,SAMSN1,CCNB2,MAD2L1,PLK1,TPX2,NOD2,MTBP,LRP8,CDC25A,CXCL10,PPP1R14B,FANCI,CKS1B,CLSPN,EZH2,CDC25C,CDCA2,HIST1H1B,CDKN3,PLAUR,FOXM1,FN1,BLM,UBE2C,IQGAP3,PPP1R14C,KIAA1804,KIF14,S100A7,FCGR1A,TTK,PSRC1,IRAK1,MMP9,CDC20,DKK1,MAGED1,CKS2,ISG15,RAD51,MST4,INCENP,CDK1,CXCR4,NCAPG2,CDKN2A,ROPN1B,PBK,CCNE2,D…
