# Supplementary material for: LncRNA-Based Classification of Triple Negative Breast Cancer Revealed Inherent Tumor Heterogeneity and Vulnerabilities
Source: Noncoding RNA. 2022 Jun 21;8(4):44. doi: 10.3390/ncrna8040044 (PMC9326727; doi:10.3390/ncrna8040044)
Supplement: Supplementary file 1 [file ncrna-08-00044-s001.zip › Supplementary table S7.xlsx]

## Sheet: enrichment.Process (2)
Supplemetary table S7. Enriched gene ontology (GO) terms in NT-like TNBC cluster based on STRING analysis
#term ID	term description	observed gene count	background gene count	strength	false discovery rate	matching proteins in your network (IDs)	matching proteins in your network (labels)
GO:0002376	Immune system process	77	2481	0.41	2.74e-11	9606.ENSP00000199764,9606.ENSP00000216117,9606.ENSP00000217407,9606.ENSP00000225964,9606.ENSP00000236147,9606.ENSP00000236671,9606.ENSP00000242208,9606.ENSP00000250092,9606.ENSP00000250160,9606.ENSP00000256412,9606.ENSP00000259396,9606.ENSP00000261267,9606.ENSP00000262629,9606.ENSP00000262746,9606.ENSP00000264170,9606.ENSP00000264246,9606.ENSP00000265148,9606.ENSP00000265748,9606.ENSP00000268389,…	CEACAM6,HMOX1,LBP,COL1A1,SELL,CTSD,INHBA,CD68,WISP1,ADAMDEC1,ORM1,LYZ,TYROBP,PRDX1,KYNU,CD80,CENPE,ANLN,IGSF6,S100A11,THY1,CXCL13,SLAMF8,FCER1G,S100P,CXCL10,ALCAM,CXCL8,CXCL11,MUCL1,CD84,MMP1,FPR3,IFI6,DHRS2,FN1,HIST1H2BK,PNP,CXCL9,RGS1,FCGR3A,S100A7,S100A8,S100A9,FCGR1A,HMGB3,GBP5,KIF2C,MMP9,EDN2,PLAU,HLA-DQA2,HLA-DQB1,UBD,ISG15,LY86,CALML5,SDC1,G6PD,HLA-DRA,MB,PPAPDC1A,LCP1,IFI30,CXCR4,ORM2,TST…
GO:0006955	Immune response	55	1588	0.46	8.3e-09	9606.ENSP00000199764,9606.ENSP00000217407,9606.ENSP00000236147,9606.ENSP00000236671,9606.ENSP00000250092,9606.ENSP00000256412,9606.ENSP00000259396,9606.ENSP00000261267,9606.ENSP00000262629,9606.ENSP00000262746,9606.ENSP00000264170,9606.ENSP00000264246,9606.ENSP00000268389,9606.ENSP00000271638,9606.ENSP00000286758,9606.ENSP00000289902,9606.ENSP00000296370,9606.ENSP00000305651,9606.ENSP00000305988,…	CEACAM6,LBP,SELL,CTSD,CD68,ADAMDEC1,ORM1,LYZ,TYROBP,PRDX1,KYNU,CD80,IGSF6,S100A11,CXCL13,FCER1G,S100P,CXCL10,ALCAM,CXCL8,CXCL11,CD84,IFI6,HIST1H2BK,PNP,CXCL9,RGS1,FCGR3A,S100A7,S100A8,S100A9,FCGR1A,HMGB3,GBP5,MMP9,PLAU,HLA-DQA2,HLA-DQB1,UBD,ISG15,LY86,CALML5,HLA-DRA,LCP1,IFI30,CXCR4,ORM2,TSTA3,HLA-DMB,LTB,FYB,MS4A1,ITGAX,TMC6,HIST1H2BJ
GO:0000280	Nuclear division	23	291	0.82	2.04e-08	9606.ENSP00000217026,9606.ENSP00000247191,9606.ENSP00000251496,9606.ENSP00000256442,9606.ENSP00000261597,9606.ENSP00000265148,9606.ENSP00000271452,9606.ENSP00000287598,9606.ENSP00000300093,9606.ENSP00000300403,9606.ENSP00000301633,9606.ENSP00000302530,9606.ENSP00000348838,9606.ENSP00000356379,9606.ENSP00000361298,9606.ENSP00000361540,9606.ENSP00000363055,9606.ENSP00000364976,9606.ENSP00000377536,…	MYBL2,DLGAP5,NCAPG,CCNB1,NDC80,CENPE,NUF2,BUB1B,PLK1,TPX2,BIRC5,BUB1,UBE2C,ASPM,KIF2C,CDC20,ZWINT,CKS2,PTTG1,CDK1,KIFC1,TOP2A,NUSAP1
GO:1903047	Mitotic cell cycle process	32	616	0.64	3.35e-08	9606.ENSP00000217026,9606.ENSP00000242208,9606.ENSP00000247191,9606.ENSP00000251496,9606.ENSP00000256442,9606.ENSP00000261597,9606.ENSP00000262300,9606.ENSP00000265148,9606.ENSP00000265748,9606.ENSP00000271452,9606.ENSP00000287598,9606.ENSP00000300093,9606.ENSP00000300403,9606.ENSP00000301633,9606.ENSP00000302530,9606.ENSP00000312995,9606.ENSP00000326550,9606.ENSP00000335357,9606.ENSP00000348838,…	MYBL2,INHBA,DLGAP5,NCAPG,CCNB1,NDC80,PKMYT1,CENPE,ANLN,NUF2,BUB1B,PLK1,TPX2,BIRC5,BUB1,CLSPN,TACC3,CDKN3,UBE2C,RRM2,IQGAP3,CEP55,KIF2C,CDC20,ZWINT,CKS2,CDK1,KIFC1,CDC45,TOP2A,NUSAP1,MUC1
GO:0034097	Response to cytokine	43	1101	0.51	4.25e-08	9606.ENSP00000216117,9606.ENSP00000217026,9606.ENSP00000217407,9606.ENSP00000225964,9606.ENSP00000261366,9606.ENSP00000264170,9606.ENSP00000264246,9606.ENSP00000286758,9606.ENSP00000289902,9606.ENSP00000294507,9606.ENSP00000301633,9606.ENSP00000305651,9606.ENSP00000306512,9606.ENSP00000306884,9606.ENSP00000322788,9606.ENSP00000333277,9606.ENSP00000342513,9606.ENSP00000346839,9606.ENSP00000352252,…	HMOX1,MYBL2,LBP,COL1A1,LMNB1,KYNU,CD80,CXCL13,FCER1G,LAPTM5,BIRC5,CXCL10,CXCL8,CXCL11,MMP1,HIST2H3D,IFI6,FN1,HIST1H3J,CXCL9,KMO,HIST2H3C,FCGR1A,GBP5,MMP9,EDN2,HLA-DQA2,HLA-DQB1,UBD,HIST1H3D,ISG15,POSTN,SDC1,HLA-DRA,LCP1,GGT1,IFI30,HIST2H3A,CXCR4,LTB,ITGAX,ACP5,MUC1
GO:0019221	Cytokine-mediated signaling pathway	33	678	0.61	5.34e-08	9606.ENSP00000216117,9606.ENSP00000217407,9606.ENSP00000261366,9606.ENSP00000264246,9606.ENSP00000286758,9606.ENSP00000289902,9606.ENSP00000301633,9606.ENSP00000305651,9606.ENSP00000306512,9606.ENSP00000306884,9606.ENSP00000322788,9606.ENSP00000333277,9606.ENSP00000342513,9606.ENSP00000346839,9606.ENSP00000352252,9606.ENSP00000354901,9606.ENSP00000358154,9606.ENSP00000358165,9606.ENSP00000361405,…	HMOX1,LBP,LMNB1,CD80,CXCL13,FCER1G,BIRC5,CXCL10,CXCL8,CXCL11,MMP1,HIST2H3D,IFI6,FN1,HIST1H3J,CXCL9,HIST2H3C,FCGR1A,MMP9,EDN2,HLA-DQA2,HLA-DQB1,HIST1H3D,ISG15,SDC1,HLA-DRA,LCP1,IFI30,HIST2H3A,CXCR4,LTB,ITGAX,MUC1
GO:0140014	Mitotic nuclear division	17	156	0.96	5.68e-08	9606.ENSP00000217026,9606.ENSP00000247191,9606.ENSP00000251496,9606.ENSP00000256442,9606.ENSP00000261597,9606.ENSP00000265148,9606.ENSP00000271452,9606.ENSP00000300093,9606.ENSP00000300403,9606.ENSP00000301633,9606.ENSP00000348838,9606.ENSP00000361298,9606.ENSP00000361540,9606.ENSP00000363055,9606.ENSP00000378699,9606.ENSP00000393963,9606.ENSP00000453403	MYBL2,DLGAP5,NCAPG,CCNB1,NDC80,CENPE,NUF2,PLK1,TPX2,BIRC5,UBE2C,KIF2C,CDC20,ZWINT,CDK1,KIFC1,NUSAP1
GO:0000278	Mitotic cell cycle	33	695	0.6	6.65e-08	9606.ENSP00000217026,9606.ENSP00000242208,9606.ENSP00000247191,9606.ENSP00000251496,9606.ENSP00000256442,9606.ENSP00000261597,9606.ENSP00000262300,9606.ENSP00000265148,9606.ENSP00000265748,9606.ENSP00000271452,9606.ENSP00000287598,9606.ENSP00000300093,9606.ENSP00000300403,9606.ENSP00000301633,9606.ENSP00000302530,9606.ENSP00000312995,9606.ENSP00000326550,9606.ENSP00000335357,9606.ENSP00000348838,…	MYBL2,INHBA,DLGAP5,NCAPG,CCNB1,NDC80,PKMYT1,CENPE,ANLN,NUF2,BUB1B,PLK1,TPX2,BIRC5,BUB1,CLSPN,TACC3,CDKN3,UBE2C,RRM2,IQGAP3,CEP55,KIF2C,CDC20,ZWINT,CKS2,CDK1,KIFC1,CDC45,TOP2A,ENSG00000258947,NUSAP1,MUC1
GO:0006323	DNA packaging	19	215	0.87	8.06e-08	9606.ENSP00000244573,9606.ENSP00000251496,9606.ENSP00000256442,9606.ENSP00000281453,9606.ENSP00000289316,9606.ENSP00000330074,9606.ENSP00000333277,9606.ENSP00000349430,9606.ENSP00000352252,9606.ENSP00000358154,9606.ENSP00000366618,9606.ENSP00000366999,9606.ENSP00000378699,9606.ENSP00000385479,9606.ENSP00000411532,9606.ENSP00000453403,9606.ENSP00000476136,9606.ENSP00000479284,9606.ENSP00000483903	HIST1H1A,NCAPG,CCNB1,CENPU,HIST1H2BD,HIST1H1B,HIST2H3D,HIST1H2BK,HIST1H3J,HIST2H3C,HIST1H2BL,HIST1H3D,CDK1,HIST2H3A,TOP2A,NUSAP1,HIST1H2BJ,HIST3H2BB,HIST1H2BN
GO:0010965	Regulation of mitotic sister chromatid separation	12	60	1.22	8.06e-08	9606.ENSP00000247191,9606.ENSP00000256442,9606.ENSP00000261597,9606.ENSP00000265148,9606.ENSP00000287598,9606.ENSP00000300093,9606.ENSP00000301633,9606.ENSP00000302530,9606.ENSP00000326550,9606.ENSP00000348838,9606.ENSP00000361540,9606.ENSP00000377536	DLGAP5,CCNB1,NDC80,CENPE,BUB1B,PLK1,BIRC5,BUB1,TACC3,UBE2C,CDC20,PTTG1
GO:0051983	Regulation of chromosome segregation	14	104	1.05	1.66e-07	9606.ENSP00000247191,9606.ENSP00000256442,9606.ENSP00000261597,9606.ENSP00000265148,9606.ENSP00000287598,9606.ENSP00000300093,9606.ENSP00000301633,9606.ENSP00000302530,9606.ENSP00000326550,9606.ENSP00000348838,9606.ENSP00000357643,9606.ENSP00000361298,9606.ENSP00000361540,9606.ENSP00000377536	DLGAP5,CCNB1,NDC80,CENPE,BUB1B,PLK1,BIRC5,BUB1,TACC3,UBE2C,MKI67,KIF2C,CDC20,PTTG1
GO:0071345	Cellular response to cytokine stimulus	39	1013	0.51	2.39e-07	9606.ENSP00000216117,9606.ENSP00000217026,9606.ENSP00000217407,9606.ENSP00000225964,9606.ENSP00000261366,9606.ENSP00000264246,9606.ENSP00000286758,9606.ENSP00000289902,9606.ENSP00000294507,9606.ENSP00000301633,9606.ENSP00000305651,9606.ENSP00000306512,9606.ENSP00000306884,9606.ENSP00000322788,9606.ENSP00000333277,9606.ENSP00000342513,9606.ENSP00000346839,9606.ENSP00000352252,9606.ENSP00000354901,…	HMOX1,MYBL2,LBP,COL1A1,LMNB1,CD80,CXCL13,FCER1G,LAPTM5,BIRC5,CXCL10,CXCL8,CXCL11,MMP1,HIST2H3D,IFI6,FN1,HIST1H3J,CXCL9,KMO,HIST2H3C,FCGR1A,GBP5,MMP9,EDN2,HLA-DQA2,HLA-DQB1,HIST1H3D,ISG15,POSTN,SDC1,HLA-DRA,LCP1,IFI30,HIST2H3A,CXCR4,LTB,ITGAX,MUC1
GO:0000819	Sister chromatid segregation	15	133	0.97	2.9e-07	9606.ENSP00000247191,9606.ENSP00000251496,9606.ENSP00000256442,9606.ENSP00000261597,9606.ENSP00000265148,9606.ENSP00000271452,9606.ENSP00000287598,9606.ENSP00000300093,9606.ENSP00000302530,9606.ENSP00000361298,9606.ENSP00000361540,9606.ENSP00000363055,9606.ENSP00000393963,9606.ENSP00000411532,9606.ENSP00000453403	DLGAP5,NCAPG,CCNB1,NDC80,CENPE,NUF2,BUB1B,PLK1,BUB1,KIF2C,CDC20,ZWINT,KIFC1,TOP2A,NUSAP1
GO:0022402	Cell cycle process	38	976	0.51	2.9e-07	9606.ENSP00000188790,9606.ENSP00000217026,9606.ENSP00000242208,9606.ENSP00000247191,9606.ENSP00000251496,9606.ENSP00000256442,9606.ENSP00000261597,9606.ENSP00000262300,9606.ENSP00000265148,9606.ENSP00000265748,9606.ENSP00000271452,9606.ENSP00000287598,9606.ENSP00000300093,9606.ENSP00000300403,9606.ENSP00000301633,9606.ENSP00000302530,9606.ENSP00000306512,9606.ENSP00000312995,9606.ENSP00000326550,…	FAP,MYBL2,INHBA,DLGAP5,NCAPG,CCNB1,NDC80,PKMYT1,CENPE,ANLN,NUF2,BUB1B,PLK1,TPX2,BIRC5,BUB1,CXCL8,CLSPN,TACC3,CDKN3,UBE2C,RRM2,IQGAP3,ASPM,BRINP3,DHCR24,CEP55,KIF2C,CDC20,ZWINT,CKS2,PTTG1,CDK1,KIFC1,CDC45,TOP2A,NUSAP1,MUC1
GO:0009605	Response to external stimulus	63	2310	0.36	3.1e-07	9606.ENSP00000216117,9606.ENSP00000217407,9606.ENSP00000225964,9606.ENSP00000233596,9606.ENSP00000250092,9606.ENSP00000256442,9606.ENSP00000259938,9606.ENSP00000261267,9606.ENSP00000262629,9606.ENSP00000262746,9606.ENSP00000264170,9606.ENSP00000264246,9606.ENSP00000267814,9606.ENSP00000274192,9606.ENSP00000276708,9606.ENSP00000286758,9606.ENSP00000289707,9606.ENSP00000289902,9606.ENSP00000296522,…	HMOX1,LBP,COL1A1,REEP6,CD68,CCNB1,CLPS,LYZ,TYROBP,PRDX1,KYNU,CD80,SORD,SRD5A1,GSDMC,CXCL13,SLAMF8,FCER1G,HPGD,AQP3,CXCL10,ALCAM,CXCL8,CXCL11,CD84,FPR3,IFI6,HIST1H2BK,CNTNAP2,CXCL9,KMO,RGS1,EFNA3,FABP7,S100A7,S100A8,S100A9,FCGR1A,COL11A1,HMGB3,GBP5,EDN2,PLAU,VSTM2L,CLPSL1,HLA-DQA2,HLA-DQB1,UBD,ISG15,POSTN,LY86,GJB2,G6PD,SPP1,HLA-DRA,TYMP,GGT1,IFI30,CXCR4,MS4A1,ENSG00000258947,ACP5,HIST1H2BJ
GO:0007088	Regulation of mitotic nuclear division	16	162	0.92	3.55e-07	9606.ENSP00000247191,9606.ENSP00000256442,9606.ENSP00000261597,9606.ENSP00000262300,9606.ENSP00000265148,9606.ENSP00000265748,9606.ENSP00000287598,9606.ENSP00000300093,9606.ENSP00000301633,9606.ENSP00000302530,9606.ENSP00000326550,9606.ENSP00000348838,9606.ENSP00000357643,9606.ENSP00000361540,9606.ENSP00000377536,9606.ENSP00000453403	DLGAP5,CCNB1,NDC80,PKMYT1,CENPE,ANLN,BUB1B,PLK1,BIRC5,BUB1,TACC3,UBE2C,MKI67,CDC20,PTTG1,NUSAP1
GO:0006334	Nucleosome assembly	14	135	0.94	2.21e-06	9606.ENSP00000244573,9606.ENSP00000281453,9606.ENSP00000289316,9606.ENSP00000330074,9606.ENSP00000333277,9606.ENSP00000349430,9606.ENSP00000352252,9606.ENSP00000358154,9606.ENSP00000366618,9606.ENSP00000366999,9606.ENSP00000385479,9606.ENSP00000476136,9606.ENSP00000479284,9606.ENSP00000483903	HIST1H1A,CENPU,HIST1H2BD,HIST1H1B,HIST2H3D,HIST1H2BK,HIST1H3J,HIST2H3C,HIST1H2BL,HIST1H3D,HIST2H3A,HIST1H2BJ,HIST3H2BB,HIST1H2BN
GO:0050900	Leukocyte migration	20	316	0.72	2.74e-06	9606.ENSP00000199764,9606.ENSP00000217407,9606.ENSP00000225964,9606.ENSP00000236147,9606.ENSP00000286758,9606.ENSP00000289707,9606.ENSP00000289902,9606.ENSP00000305651,9606.ENSP00000306512,9606.ENSP00000306884,9606.ENSP00000312367,9606.ENSP00000322788,9606.ENSP00000346839,9606.ENSP00000354901,9606.ENSP00000357722,9606.ENSP00000357727,9606.ENSP00000361668,9606.ENSP00000370542,9606.ENSP00000386884,…	CEACAM6,LBP,COL1A1,SELL,CXCL13,SLAMF8,FCER1G,CXCL10,CXCL8,CXCL11,CD84,MMP1,FN1,CXCL9,S100A8,S100A9,EDN2,SDC1,CXCR4,ITGAX
GO:0009607	Response to biotic stimulus	42	1289	0.44	3.3e-06	9606.ENSP00000188790,9606.ENSP00000217407,9606.ENSP00000250092,9606.ENSP00000259938,9606.ENSP00000261267,9606.ENSP00000262629,9606.ENSP00000262746,9606.ENSP00000264170,9606.ENSP00000264246,9606.ENSP00000276708,9606.ENSP00000286758,9606.ENSP00000289707,9606.ENSP00000289902,9606.ENSP00000296522,9606.ENSP00000305651,9606.ENSP00000306512,9606.ENSP00000306884,9606.ENSP00000312367,9606.ENSP00000342513,…	FAP,LBP,CD68,CLPS,LYZ,TYROBP,PRDX1,KYNU,CD80,GSDMC,CXCL13,SLAMF8,FCER1G,HPGD,CXCL10,CXCL8,CXCL11,CD84,IFI6,HIST1H2BK,CXCL9,KMO,RGS1,S100A7,S100A8,S100A9,FCGR1A,HMGB3,GBP5,HLA-DQA2,HLA-DQB1,UBD,ISG15,LY86,GJB2,HLA-DRA,GGT1,IFI30,CXCR4,MS4A1,ACP5,HIST1H2BJ
GO:0006952	Defense response	42	1296	0.43	3.63e-06	9606.ENSP00000216117,9606.ENSP00000217407,9606.ENSP00000242208,9606.ENSP00000250092,9606.ENSP00000259396,9606.ENSP00000261267,9606.ENSP00000262629,9606.ENSP00000262746,9606.ENSP00000264170,9606.ENSP00000276708,9606.ENSP00000286758,9606.ENSP00000289707,9606.ENSP00000289902,9606.ENSP00000305651,9606.ENSP00000306512,9606.ENSP00000306884,9606.ENSP00000309270,9606.ENSP00000312367,9606.ENSP00000341821,…	HMOX1,LBP,INHBA,CD68,ORM1,LYZ,TYROBP,PRDX1,KYNU,GSDMC,CXCL13,SLAMF8,FCER1G,CXCL10,CXCL8,CXCL11,CHST1,CD84,FPR3,IFI6,FN1,HIST1H2BK,CXCL9,S100A7,S100A8,S100A9,FCGR1A,HMGB3,GBP5,HLA-DQA2,HLA-DQB1,UBD,ISG15,LY86,SDC1,SPP1,HLA-DRA,IFI30,CXCR4,ORM2,ACP5,HIST1H2BJ
GO:0030071	Regulation of mitotic metaphase/anaphase transition	10	56	1.17	3.63e-06	9606.ENSP00000247191,9606.ENSP00000256442,9606.ENSP00000261597,9606.ENSP00000265148,9606.ENSP00000287598,9606.ENSP00000300093,9606.ENSP00000301633,9606.ENSP00000302530,9606.ENSP00000348838,9606.ENSP00000361540	DLGAP5,CCNB1,NDC80,CENPE,BUB1B,PLK1,BIRC5,BUB1,UBE2C,CDC20
GO:0071103	DNA conformation change	20	328	0.71	4.24e-06	9606.ENSP00000244573,9606.ENSP00000251496,9606.ENSP00000256442,9606.ENSP00000281453,9606.ENSP00000289316,9606.ENSP00000330074,9606.ENSP00000333277,9606.ENSP00000349430,9606.ENSP00000352252,9606.ENSP00000358154,9606.ENSP00000359393,9606.ENSP00000366618,9606.ENSP00000366999,9606.ENSP00000378699,9606.ENSP00000385479,9606.ENSP00000411532,9606.ENSP00000453403,9606.ENSP00000476136,9606.ENSP00000479284,…	HIST1H1A,NCAPG,CCNB1,CENPU,HIST1H2BD,HIST1H1B,HIST2H3D,HIST1H2BK,HIST1H3J,HIST2H3C,HMGB3,HIST1H2BL,HIST1H3D,CDK1,HIST2H3A,TOP2A,NUSAP1,HIST1H2BJ,HIST3H2BB,HIST1H2BN
GO:0051707	Response to other organism	41	1256	0.44	4.25e-06	9606.ENSP00000217407,9606.ENSP00000250092,9606.ENSP00000259938,9606.ENSP00000261267,9606.ENSP00000262629,9606.ENSP00000262746,9606.ENSP00000264170,9606.ENSP00000264246,9606.ENSP00000276708,9606.ENSP00000286758,9606.ENSP00000289707,9606.ENSP00000289902,9606.ENSP00000296522,9606.ENSP00000305651,9606.ENSP00000306512,9606.ENSP00000306884,9606.ENSP00000312367,9606.ENSP00000342513,9606.ENSP00000349430,…	LBP,CD68,CLPS,LYZ,TYROBP,PRDX1,KYNU,CD80,GSDMC,CXCL13,SLAMF8,FCER1G,HPGD,CXCL10,CXCL8,CXCL11,CD84,IFI6,HIST1H2BK,CXCL9,KMO,RGS1,S100A7,S100A8,S100A9,FCGR1A,HMGB3,GBP5,HLA-DQA2,HLA-DQB1,UBD,ISG15,LY86,GJB2,HLA-DRA,GGT1,IFI30,CXCR4,MS4A1,ACP5,HIST1H2BJ
GO:0051276	Chromosome organization	37	1066	0.46	5.01e-06	9606.ENSP00000244573,9606.ENSP00000247191,9606.ENSP00000251496,9606.ENSP00000256442,9606.ENSP00000261597,9606.ENSP00000265148,9606.ENSP00000271452,9606.ENSP00000281453,9606.ENSP00000287598,9606.ENSP00000289316,9606.ENSP00000300093,9606.ENSP00000302530,9606.ENSP00000308750,9606.ENSP00000330074,9606.ENSP00000333277,9606.ENSP00000341094,9606.ENSP00000349430,9606.ENSP00000351589,9606.ENSP00000352119,…	HIST1H1A,DLGAP5,NCAPG,CCNB1,NDC80,CENPE,NUF2,CENPU,BUB1B,HIST1H2BD,PLK1,BUB1,CBX2,HIST1H1B,HIST2H3D,HIST1H2AD,HIST1H2BK,HIST1H2AI,HIST1H2AG,HIST1H3J,HIST2H3C,HIST2H2AA,HMGB3,KIF2C,CDC20,ZWINT,HIST1H2BL,HIST1H3D,PTTG1,CDK1,HIST2H3A,KIFC1,TOP2A,NUSAP1,HIST1H2BJ,HIST3H2BB,HIST1H2BN
GO:0098813	Nuclear chromosome segregation	16	209	0.81	6.37e-06	9606.ENSP00000247191,9606.ENSP00000251496,9606.ENSP00000256442,9606.ENSP00000261597,9606.ENSP00000265148,9606.ENSP00000271452,9606.ENSP00000287598,9606.ENSP00000300093,9606.ENSP00000302530,9606.ENSP00000361298,9606.ENSP00000361540,9606.ENSP00000363055,9606.ENSP00000377536,9606.ENSP00000393963,9606.ENSP00000411532,9606.ENSP00000453403	DLGAP5,NCAPG,CCNB1,NDC80,CENPE,NUF2,BUB1B,PLK1,BUB1,KIF2C,CDC20,ZWINT,PTTG1,KIFC1,TOP2A,NUSAP1
GO:0051301	Cell division	24	493	0.61	6.72e-06	9606.ENSP00000251496,9606.ENSP00000256442,9606.ENSP00000261597,9606.ENSP00000265148,9606.ENSP00000265748,9606.ENSP00000271452,9606.ENSP00000287598,9606.ENSP00000300093,9606.ENSP00000300403,9606.ENSP00000301633,9606.ENSP00000302530,9606.ENSP00000326550,9606.ENSP00000348838,9606.ENSP00000356379,9606.ENSP00000360540,9606.ENSP00000361298,9606.ENSP00000361540,9606.ENSP00000363055,9606.ENSP00000364976,…	NCAPG,CCNB1,NDC80,CENPE,ANLN,NUF2,BUB1B,PLK1,TPX2,BIRC5,BUB1,TACC3,UBE2C,ASPM,CEP55,KIF2C,CDC20,ZWINT,CKS2,PTTG1,CDK1,KIFC1,TOP2A,NUSAP1
GO:0065004	protein-DNA complex assembly	16	213	0.8	7.69e-06	9606.ENSP00000244573,9606.ENSP00000265148,9606.ENSP00000281453,9606.ENSP00000289316,9606.ENSP00000330074,9606.ENSP00000333277,9606.ENSP00000349430,9606.ENSP00000352252,9606.ENSP00000358154,9606.ENSP00000366618,9606.ENSP00000366999,9606.ENSP00000385479,9606.ENSP00000405726,9606.ENSP00000476136,9606.ENSP00000479284,9606.ENSP00000483903	HIST1H1A,CENPE,CENPU,HIST1H2BD,HIST1H1B,HIST2H3D,HIST1H2BK,HIST1H3J,HIST2H3C,HIST1H2BL,HIST1H3D,HIST2H3A,CDC45,HIST1H2BJ,HIST3H2BB,HIST1H2BN
GO:0000070	Mitotic sister chromatid segregation	12	108	0.97	9.59e-06	9606.ENSP00000247191,9606.ENSP00000251496,9606.ENSP00000256442,9606.ENSP00000261597,9606.ENSP00000265148,9606.ENSP00000271452,9606.ENSP00000300093,9606.ENSP00000361298,9606.ENSP00000361540,9606.ENSP00000363055,9606.ENSP00000393963,9606.ENSP00000453403	DLGAP5,NCAPG,CCNB1,NDC80,CENPE,NUF2,PLK1,KIF2C,CDC20,ZWINT,KIFC1,NUSAP1
GO:0007346	Regulation of mitotic cell cycle	28	676	0.54	1.01e-05	9606.ENSP00000188790,9606.ENSP00000247191,9606.ENSP00000256442,9606.ENSP00000261597,9606.ENSP00000262300,9606.ENSP00000265148,9606.ENSP00000265748,9606.ENSP00000287598,9606.ENSP00000300093,9606.ENSP00000300403,9606.ENSP00000301633,9606.ENSP00000302530,9606.ENSP00000312995,9606.ENSP00000326550,9606.ENSP00000348838,9606.ENSP00000356432,9606.ENSP00000357643,9606.ENSP00000361540,9606.ENSP00000363055,…	FAP,DLGAP5,CCNB1,NDC80,PKMYT1,CENPE,ANLN,BUB1B,PLK1,TPX2,BIRC5,BUB1,CLSPN,TACC3,UBE2C,BRINP3,MKI67,CDC20,ZWINT,CKS2,UBD,HMMR,PTTG1,CDK1,CDC45,TOP2A,NUSAP1,MUC1
GO:0009617	Response to bacterium	27	634	0.55	1.04e-05	9606.ENSP00000217407,9606.ENSP00000250092,9606.ENSP00000259938,9606.ENSP00000261267,9606.ENSP00000264246,9606.ENSP00000276708,9606.ENSP00000286758,9606.ENSP00000289707,9606.ENSP00000289902,9606.ENSP00000296522,9606.ENSP00000305651,9606.ENSP00000306512,9606.ENSP00000306884,9606.ENSP00000349430,9606.ENSP00000354901,9606.ENSP00000355517,9606.ENSP00000356429,9606.ENSP00000357712,9606.ENSP00000357722,…	LBP,CD68,CLPS,LYZ,CD80,GSDMC,CXCL13,SLAMF8,FCER1G,HPGD,CXCL10,CXCL8,CXCL11,HIST1H2BK,CXCL9,KMO,RGS1,S100A7,S100A8,S100A9,GBP5,ISG15,GJB2,GGT1,MS4A1,ACP5,HIST1H2BJ
GO:0007049	Cell cycle	41	1313	0.42	1.05e-05	9606.ENSP00000188790,9606.ENSP00000217026,9606.ENSP00000242208,9606.ENSP00000247191,9606.ENSP00000251496,9606.ENSP00000251864,9606.ENSP00000256442,9606.ENSP00000261597,9606.ENSP00000262300,9606.ENSP00000265148,9606.ENSP00000265748,9606.ENSP00000271452,9606.ENSP00000287598,9606.ENSP00000300093,9606.ENSP00000300403,9606.ENSP00000301633,9606.ENSP00000302530,9606.ENSP00000306512,9606.ENSP00000312995,…	FAP,MYBL2,INHBA,DLGAP5,NCAPG,TDRD1,CCNB1,NDC80,PKMYT1,CENPE,ANLN,NUF2,BUB1B,PLK1,TPX2,BIRC5,BUB1,CXCL8,CLSPN,TACC3,CDKN3,UBE2C,RRM2,IQGAP3,ASPM,BRINP3,MKI67,DHCR24,CEP55,KIF2C,CDC20,ZWINT,CKS2,PTTG1,CDK1,KIFC1,CDC45,TOP2A,ENSG00000258947,NUSAP1,MUC1
GO:0006954	Inflammatory response	24	515	0.59	1.25e-05	9606.ENSP00000216117,9606.ENSP00000217407,9606.ENSP00000250092,9606.ENSP00000259396,9606.ENSP00000261267,9606.ENSP00000262629,9606.ENSP00000286758,9606.ENSP00000289707,9606.ENSP00000289902,9606.ENSP00000305651,9606.ENSP00000306512,9606.ENSP00000306884,9606.ENSP00000309270,9606.ENSP00000341821,9606.ENSP00000346839,9606.ENSP00000354901,9606.ENSP00000357722,9606.ENSP00000357727,9606.ENSP00000359488,…	HMOX1,LBP,CD68,ORM1,LYZ,TYROBP,CXCL13,SLAMF8,FCER1G,CXCL10,CXCL8,CXCL11,CHST1,FPR3,FN1,CXCL9,S100A8,S100A9,GBP5,LY86,SDC1,SPP1,CXCR4,ORM2
GO:1902850	Microtubule cytoskeleton organization involved in mitosis	12	112	0.95	1.25e-05	9606.ENSP00000217026,9606.ENSP00000256442,9606.ENSP00000261597,9606.ENSP00000265148,9606.ENSP00000271452,9606.ENSP00000300093,9606.ENSP00000300403,9606.ENSP00000301633,9606.ENSP00000326550,9606.ENSP00000361540,9606.ENSP00000393963,9606.ENSP00000453403	MYBL2,CCNB1,NDC80,CENPE,NUF2,PLK1,TPX2,BIRC5,TACC3,CDC20,KIFC1,NUSAP1
GO:0050896	Response to stimulus	138	8046	0.16	1.48e-05	9606.ENSP00000188790,9606.ENSP00000199764,9606.ENSP00000216117,9606.ENSP00000217026,9606.ENSP00000217407,9606.ENSP00000222271,9606.ENSP00000225964,9606.ENSP00000233596,9606.ENSP00000236147,9606.ENSP00000236671,9606.ENSP00000242208,9606.ENSP00000247191,9606.ENSP00000250092,9606.ENSP00000250160,9606.ENSP00000250457,9606.ENSP00000256412,9606.ENSP00000256442,9606.ENSP00000259396,9606.ENSP00000259938,…	FAP,CEACAM6,HMOX1,MYBL2,LBP,COMP,COL1A1,REEP6,SELL,CTSD,INHBA,DLGAP5,CD68,WISP1,EGLN3,ADAMDEC1,CCNB1,ORM1,CLPS,SULF1,MMP13,LYZ,LMNB1,TYROBP,PRDX1,KYNU,CD80,TFEC,SORD,BCL2A1,IGSF6,S100A11,SRD5A1,GGCT,GSDMC,THY1,CXCL13,SLAMF8,FCER1G,LAPTM5,S100P,HPGD,AQP3,PLK1,BIRC5,ACSM1,CXCL10,CST1,ALCAM,CXCL8,CXCL11,RND1,CHST1,MUCL1,CD84,CLSPN,MMP1,CTHRC1,HIST2H3D,UGT2B28,FPR3,IFI6,DHRS2,FN1,HIST1H2BK,HIST1H3J,T…
GO:0009987	Cellular process	212	15024	0.07	1.65e-05	9606.ENSP00000005286,9606.ENSP00000188790,9606.ENSP00000198801,9606.ENSP00000199764,9606.ENSP00000215743,9606.ENSP00000216117,9606.ENSP00000217026,9606.ENSP00000217407,9606.ENSP00000222271,9606.ENSP00000225777,9606.ENSP00000225964,9606.ENSP00000226444,9606.ENSP00000233596,9606.ENSP00000236147,9606.ENSP00000236671,9606.ENSP00000242208,9606.ENSP00000244573,9606.ENSP00000247191,9606.ENSP00000250092,…	TMEM132A,FAP,MOGAT2,CEACAM6,MMP11,HMOX1,MYBL2,LBP,COMP,SYNGR2,COL1A1,SULT1E1,REEP6,SELL,CTSD,INHBA,HIST1H1A,DLGAP5,CD68,WISP1,EGLN3,NCAPG,TDRD1,ALDH3B2,HRASLS2,CCNB1,ORM1,CLPS,SULF1,MMP13,LYZ,LMNB1,NDC80,PKMYT1,TYROBP,PRDX1,KYNU,SRD5A3,CD80,CENPE,TFEC,ANLN,SORD,BCL2A1,IGSF6,NUF2,S100A11,ABCA12,SRD5A1,GGCT,GSDMC,FADS2,CENPU,HGD,THY1,CXCL13,GLYATL2,BUB1B,HPD,HIST1H2BD,SLAMF8,FCER1G,LAPTM5,S100P,HPG…
GO:0002682	Regulation of immune system process	44	1514	0.39	1.97e-05	9606.ENSP00000216117,9606.ENSP00000217407,9606.ENSP00000225964,9606.ENSP00000236147,9606.ENSP00000242208,9606.ENSP00000250092,9606.ENSP00000259396,9606.ENSP00000262629,9606.ENSP00000264246,9606.ENSP00000284240,9606.ENSP00000285670,9606.ENSP00000286758,9606.ENSP00000289707,9606.ENSP00000289902,9606.ENSP00000297991,9606.ENSP00000305651,9606.ENSP00000306512,9606.ENSP00000311364,9606.ENSP00000312367,…	HMOX1,LBP,COL1A1,SELL,INHBA,CD68,ORM1,TYROBP,CD80,THY1,SAMSN1,CXCL13,SLAMF8,FCER1G,AQP3,CXCL10,CXCL8,MUCL1,CD84,HIST2H3D,FPR3,HIST1H3J,PNP,FCGR3A,S100A7,HIST2H3C,FCGR1A,HMGB3,GBP5,EDN2,PGC,HLA-DQA2,HLA-DQB1,HIST1H3D,ISG15,HLA-DRA,PPAPDC1A,GGT1,HIST2H3A,ORM2,HLA-DMB,FYB,MS4A1,MUC1
GO:0007059	Chromosome segregation	17	268	0.72	2.11e-05	9606.ENSP00000247191,9606.ENSP00000251496,9606.ENSP00000256442,9606.ENSP00000261597,9606.ENSP00000265148,9606.ENSP00000271452,9606.ENSP00000287598,9606.ENSP00000300093,9606.ENSP00000301633,9606.ENSP00000302530,9606.ENSP00000361298,9606.ENSP00000361540,9606.ENSP00000363055,9606.ENSP00000377536,9606.ENSP00000393963,9606.ENSP00000411532,9606.ENSP00000453403	DLGAP5,NCAPG,CCNB1,NDC80,CENPE,NUF2,BUB1B,PLK1,BIRC5,BUB1,KIF2C,CDC20,ZWINT,PTTG1,KIFC1,TOP2A,NUSAP1
GO:0002274	Myeloid leukocyte activation	25	585	0.55	2.64e-05	9606.ENSP00000199764,9606.ENSP00000217407,9606.ENSP00000236147,9606.ENSP00000236671,9606.ENSP00000250092,9606.ENSP00000259396,9606.ENSP00000261267,9606.ENSP00000262629,9606.ENSP00000271638,9606.ENSP00000289902,9606.ENSP00000296370,9606.ENSP00000306512,9606.ENSP00000344674,9606.ENSP00000354532,9606.ENSP00000357712,9606.ENSP00000357722,9606.ENSP00000357727,9606.ENSP00000361405,9606.ENSP00000361668,…	CEACAM6,LBP,SELL,CTSD,CD68,ORM1,LYZ,TYROBP,S100A11,FCER1G,S100P,CXCL8,DHRS2,PNP,S100A7,S100A8,S100A9,MMP9,EDN2,PLAU,UBD,CALML5,ORM2,ITGAX,TMC6
GO:0042221	Response to chemical	88	4333	0.23	2.79e-05	9606.ENSP00000216117,9606.ENSP00000217026,9606.ENSP00000217407,9606.ENSP00000222271,9606.ENSP00000225964,9606.ENSP00000236147,9606.ENSP00000242208,9606.ENSP00000250092,9606.ENSP00000250457,9606.ENSP00000256442,9606.ENSP00000259938,9606.ENSP00000260302,9606.ENSP00000261366,9606.ENSP00000262746,9606.ENSP00000264170,9606.ENSP00000264246,9606.ENSP00000267814,9606.ENSP00000274192,9606.ENSP00000286758,…	HMOX1,MYBL2,LBP,COMP,COL1A1,SELL,INHBA,CD68,EGLN3,CCNB1,CLPS,MMP13,LMNB1,PRDX1,KYNU,CD80,SORD,SRD5A1,CXCL13,SLAMF8,FCER1G,LAPTM5,S100P,HPGD,AQP3,BIRC5,ACSM1,CXCL10,CST1,ALCAM,CXCL8,CXCL11,MMP1,HIST2H3D,UGT2B28,FPR3,IFI6,DHRS2,FN1,HIST1H3J,TRPV6,IQGAP3,PNP,CXCL9,KMO,BRINP3,EFNA3,S100A7,S100A8,S100A9,HIST2H3C,FCGR1A,GBP5,DHCR24,MMP9,EDN2,PLAU,VSTM2L,CLPSL1,HLA-DQA2,HLA-DQB1,UBD,HIST1H3D,ISG15,POSTN…
GO:0044419	Interspecies interaction between organisms	50	1899	0.34	3.78e-05	9606.ENSP00000217407,9606.ENSP00000225777,9606.ENSP00000250092,9606.ENSP00000259938,9606.ENSP00000261267,9606.ENSP00000262629,9606.ENSP00000262746,9606.ENSP00000264170,9606.ENSP00000264246,9606.ENSP00000276708,9606.ENSP00000281453,9606.ENSP00000286758,9606.ENSP00000289707,9606.ENSP00000289902,9606.ENSP00000296522,9606.ENSP00000302530,9606.ENSP00000305651,9606.ENSP00000306512,9606.ENSP00000306884,…	LBP,SYNGR2,CD68,CLPS,LYZ,TYROBP,PRDX1,KYNU,CD80,GSDMC,CENPU,CXCL13,SLAMF8,FCER1G,HPGD,BUB1,CXCL10,CXCL8,CXCL11,CD84,MMP1,IFI6,FN1,HIST1H2BK,CXCL9,KMO,RGS1,S100A7,S100A8,S100A9,FCGR1A,HMGB3,GBP5,HLA-DQA2,HLA-DQB1,UBD,ISG15,LY86,GJB2,CDK1,HLA-DRA,GGT1,IFI30,CXCR4,ACE2,LRRC15,MS4A1,KPNA2,ACP5,HIST1H2BJ
GO:0007052	Mitotic spindle organization	10	81	1.01	4.27e-05	9606.ENSP00000217026,9606.ENSP00000256442,9606.ENSP00000261597,9606.ENSP00000265148,9606.ENSP00000271452,9606.ENSP00000300403,9606.ENSP00000301633,9606.ENSP00000326550,9606.ENSP00000361540,9606.ENSP00000393963	MYBL2,CCNB1,NDC80,CENPE,NUF2,TPX2,BIRC5,TACC3,CDC20,KIFC1
GO:0033044	Regulation of chromosome organization	19	359	0.65	4.53e-05	9606.ENSP00000244573,9606.ENSP00000247191,9606.ENSP00000256442,9606.ENSP00000261597,9606.ENSP00000265148,9606.ENSP00000287598,9606.ENSP00000300093,9606.ENSP00000301633,9606.ENSP00000302530,9606.ENSP00000307607,9606.ENSP00000326550,9606.ENSP00000330074,9606.ENSP00000348838,9606.ENSP00000357643,9606.ENSP00000361540,9606.ENSP00000377536,9606.ENSP00000405726,9606.ENSP00000411532,9606.ENSP00000484824	HIST1H1A,DLGAP5,CCNB1,NDC80,CENPE,BUB1B,PLK1,BIRC5,BUB1,SDR16C5,TACC3,HIST1H1B,UBE2C,MKI67,CDC20,PTTG1,CDC45,TOP2A,MUC1
GO:0006950	Response to stress	74	3485	0.25	8.72e-05	9606.ENSP00000216117,9606.ENSP00000217407,9606.ENSP00000222271,9606.ENSP00000225964,9606.ENSP00000242208,9606.ENSP00000250092,9606.ENSP00000250457,9606.ENSP00000256442,9606.ENSP00000259396,9606.ENSP00000261267,9606.ENSP00000262629,9606.ENSP00000262746,9606.ENSP00000264170,9606.ENSP00000265440,9606.ENSP00000267814,9606.ENSP00000267953,9606.ENSP00000274192,9606.ENSP00000276708,9606.ENSP00000286758,…	HMOX1,LBP,COMP,COL1A1,INHBA,CD68,EGLN3,CCNB1,ORM1,LYZ,TYROBP,PRDX1,KYNU,TFEC,SORD,BCL2A1,SRD5A1,GSDMC,CXCL13,SLAMF8,FCER1G,AQP3,PLK1,CXCL10,CXCL8,CXCL11,CHST1,CD84,CLSPN,HIST2H3D,FPR3,IFI6,DHRS2,FN1,HIST1H2BK,HIST1H3J,CXCL9,KMO,UBE2T,S100A7,S100A8,S100A9,HIST2H3C,FCGR1A,HMGB3,GBP5,DHCR24,MMP9,PLAU,HLA-DQA2,HLA-DQB1,UBD,HIST1H3D,ISG15,POSTN,LY86,SDC1,GJB2,G6PD,PTTG1,SPP1,CDK1,HLA-DRA,MB,IFI30,PYCR…
GO:0002252	Immune effector process	32	969	0.44	9.51e-05	9606.ENSP00000199764,9606.ENSP00000217407,9606.ENSP00000236147,9606.ENSP00000236671,9606.ENSP00000250092,9606.ENSP00000259396,9606.ENSP00000261267,9606.ENSP00000262629,9606.ENSP00000262746,9606.ENSP00000271638,9606.ENSP00000289902,9606.ENSP00000296370,9606.ENSP00000305651,9606.ENSP00000342513,9606.ENSP00000354532,9606.ENSP00000354901,9606.ENSP00000356946,9606.ENSP00000357712,9606.ENSP00000357722,…	CEACAM6,LBP,SELL,CTSD,CD68,ORM1,LYZ,TYROBP,PRDX1,S100A11,FCER1G,S100P,CXCL10,IFI6,PNP,CXCL9,FCGR3A,S100A7,S100A8,S100A9,FCGR1A,MMP9,PLAU,HLA-DQB1,ISG15,CALML5,PPAPDC1A,LCP1,ORM2,TSTA3,ITGAX,TMC6
GO:0030595	Leukocyte chemotaxis	12	142	0.85	9.51e-05	9606.ENSP00000217407,9606.ENSP00000286758,9606.ENSP00000289707,9606.ENSP00000289902,9606.ENSP00000305651,9606.ENSP00000306512,9606.ENSP00000306884,9606.ENSP00000354901,9606.ENSP00000357722,9606.ENSP00000357727,9606.ENSP00000361668,9606.ENSP00000386884	LBP,CXCL13,SLAMF8,FCER1G,CXCL10,CXCL8,CXCL11,CXCL9,S100A8,S100A9,EDN2,CXCR4
GO:0051726	Regulation of cell cycle	37	1230	0.4	9.51e-05	9606.ENSP00000188790,9606.ENSP00000217026,9606.ENSP00000242208,9606.ENSP00000247191,9606.ENSP00000256442,9606.ENSP00000261597,9606.ENSP00000262300,9606.ENSP00000265148,9606.ENSP00000265748,9606.ENSP00000287598,9606.ENSP00000296522,9606.ENSP00000300093,9606.ENSP00000300403,9606.ENSP00000301633,9606.ENSP00000302530,9606.ENSP00000306512,9606.ENSP00000312995,9606.ENSP00000326550,9606.ENSP00000335357,…	FAP,MYBL2,INHBA,DLGAP5,CCNB1,NDC80,PKMYT1,CENPE,ANLN,BUB1B,HPGD,PLK1,TPX2,BIRC5,BUB1,CXCL8,CLSPN,TACC3,CDKN3,UBE2C,RRM2,ASPM,BRINP3,MKI67,DHCR24,CDC20,ZWINT,CKS2,UBD,ALOX15B,HMMR,PTTG1,CDK1,CDC45,TOP2A,NUSAP1,MUC1
GO:0010033	Response to organic substance	66	3011	0.26	0.00016	9606.ENSP00000216117,9606.ENSP00000217026,9606.ENSP00000217407,9606.ENSP00000222271,9606.ENSP00000225964,9606.ENSP00000236147,9606.ENSP00000242208,9606.ENSP00000250092,9606.ENSP00000256442,9606.ENSP00000260302,9606.ENSP00000261366,9606.ENSP00000264170,9606.ENSP00000264246,9606.ENSP00000267814,9606.ENSP00000274192,9606.ENSP00000286758,9606.ENSP00000289902,9606.ENSP00000294507,9606.ENSP00000296370,…	HMOX1,MYBL2,LBP,COMP,COL1A1,SELL,INHBA,CD68,CCNB1,MMP13,LMNB1,KYNU,CD80,SORD,SRD5A1,CXCL13,FCER1G,LAPTM5,S100P,HPGD,AQP3,BIRC5,CXCL10,CXCL8,CXCL11,MMP1,HIST2H3D,IFI6,FN1,HIST1H3J,IQGAP3,CXCL9,KMO,BRINP3,S100A7,S100A8,HIST2H3C,FCGR1A,GBP5,DHCR24,MMP9,EDN2,HLA-DQA2,HLA-DQB1,UBD,HIST1H3D,ISG15,POSTN,SDC1,GJB2,G6PD,SPP1,CDK1,HLA-DRA,MB,LCP1,GGT1,IFI30,HIST2H3A,CXCR4,DDC,LTB,TDO2,ITGAX,ACP5,MUC1
GO:0002684	Positive regulation of immune system process	31	949	0.44	0.00017	9606.ENSP00000216117,9606.ENSP00000217407,9606.ENSP00000242208,9606.ENSP00000262629,9606.ENSP00000264246,9606.ENSP00000284240,9606.ENSP00000286758,9606.ENSP00000289902,9606.ENSP00000297991,9606.ENSP00000305651,9606.ENSP00000306512,9606.ENSP00000311364,9606.ENSP00000312367,9606.ENSP00000341821,9606.ENSP00000354532,9606.ENSP00000356946,9606.ENSP00000357712,9606.ENSP00000358165,9606.ENSP00000359393,…	HMOX1,LBP,INHBA,TYROBP,CD80,THY1,CXCL13,FCER1G,AQP3,CXCL10,CXCL8,MUCL1,CD84,FPR3,PNP,FCGR3A,S100A7,FCGR1A,HMGB3,GBP5,EDN2,PGC,HLA-DQA2,HLA-DQB1,ISG15,HLA-DRA,PPAPDC1A,HLA-DMB,FYB,MS4A1,MUC1
GO:0030593	Neutrophil chemotaxis	9	74	1.01	0.00017	9606.ENSP00000286758,9606.ENSP00000289902,9606.ENSP00000305651,9606.ENSP00000306512,9606.ENSP00000306884,9606.ENSP00000354901,9606.ENSP00000357722,9606.ENSP00000357727,9606.ENSP00000361668	CXCL13,FCER1G,CXCL10,CXCL8,CXCL11,CXCL9,S100A8,S100A9,EDN2
GO:0070887	Cellular response to chemical stimulus	64	2919	0.26	0.00024	9606.ENSP00000216117,9606.ENSP00000217026,9606.ENSP00000217407,9606.ENSP00000222271,9606.ENSP00000225964,9606.ENSP00000242208,9606.ENSP00000250092,9606.ENSP00000250457,9606.ENSP00000256442,9606.ENSP00000261366,9606.ENSP00000262746,9606.ENSP00000264246,9606.ENSP00000274192,9606.ENSP00000286758,9606.ENSP00000289707,9606.ENSP00000289902,9606.ENSP00000294507,9606.ENSP00000296522,9606.ENSP00000297991,…	HMOX1,MYBL2,LBP,COMP,COL1A1,INHBA,CD68,EGLN3,CCNB1,LMNB1,PRDX1,CD80,SRD5A1,CXCL13,SLAMF8,FCER1G,LAPTM5,HPGD,AQP3,BIRC5,ACSM1,CXCL10,CXCL8,CXCL11,MMP1,HIST2H3D,UGT2B28,IFI6,DHRS2,FN1,HIST1H3J,IQGAP3,CXCL9,KMO,BRINP3,S100A8,S100A9,HIST2H3C,FCGR1A,GBP5,MMP9,EDN2,HLA-DQA2,HLA-DQB1,HIST1H3D,ISG15,POSTN,SDC1,GJB2,G6PD,SPP1,CDK1,HLA-DRA,LCP1,GGT1,IFI30,PYCR1,HIST2H3A,CXCR4,UGT2B11,DDC,LTB,ITGAX,MUC1
GO:0042447	Hormone catabolic process	5	11	1.58	0.00025	9606.ENSP00000226444,9606.ENSP00000274192,9606.ENSP00000378517,9606.ENSP00000450980,9606.ENSP00000451406	SULT1E1,SRD5A1,SPP1,DIO2,HSD17B6
GO:0001775	Cell activation	33	1075	0.41	0.00026	9606.ENSP00000199764,9606.ENSP00000217407,9606.ENSP00000222271,9606.ENSP00000225964,9606.ENSP00000236147,9606.ENSP00000236671,9606.ENSP00000250092,9606.ENSP00000259396,9606.ENSP00000261267,9606.ENSP00000262629,9606.ENSP00000262746,9606.ENSP00000271638,9606.ENSP00000289707,9606.ENSP00000289902,9606.ENSP00000296370,9606.ENSP00000305651,9606.ENSP00000306512,9606.ENSP00000344674,9606.ENSP00000354532,…	CEACAM6,LBP,COMP,COL1A1,SELL,CTSD,CD68,ORM1,LYZ,TYROBP,PRDX1,S100A11,SLAMF8,FCER1G,S100P,CXCL10,CXCL8,DHRS2,PNP,S100A7,S100A8,S100A9,MMP9,EDN2,PLAU,UBD,CALML5,LCP1,ORM2,TPD52,MS4A1,ITGAX,TMC6
GO:0042119	Neutrophil activation	21	497	0.55	0.00027	9606.ENSP00000199764,9606.ENSP00000236147,9606.ENSP00000236671,9606.ENSP00000250092,9606.ENSP00000259396,9606.ENSP00000261267,9606.ENSP00000262629,9606.ENSP00000271638,9606.ENSP00000289902,9606.ENSP00000296370,9606.ENSP00000306512,9606.ENSP00000354532,9606.ENSP00000357712,9606.ENSP00000357722,9606.ENSP00000357727,9606.ENSP00000361405,9606.ENSP00000361850,9606.ENSP00000369689,9606.ENSP00000394936,…	CEACAM6,SELL,CTSD,CD68,ORM1,LYZ,TYROBP,S100A11,FCER1G,S100P,CXCL8,PNP,S100A7,S100A8,S100A9,MMP9,PLAU,CALML5,ORM2,ITGAX,TMC6
GO:0045321	Leukocyte activation	30	929	0.43	0.00031	9606.ENSP00000199764,9606.ENSP00000217407,9606.ENSP00000236147,9606.ENSP00000236671,9606.ENSP00000250092,9606.ENSP00000259396,9606.ENSP00000261267,9606.ENSP00000262629,9606.ENSP00000262746,9606.ENSP00000271638,9606.ENSP00000289707,9606.ENSP00000289902,9606.ENSP00000296370,9606.ENSP00000306512,9606.ENSP00000344674,9606.ENSP00000354532,9606.ENSP00000357712,9606.ENSP00000357722,9606.ENSP00000357727,…	CEACAM6,LBP,SELL,CTSD,CD68,ORM1,LYZ,TYROBP,PRDX1,S100A11,SLAMF8,FCER1G,S100P,CXCL8,DHRS2,PNP,S100A7,S100A8,S100A9,MMP9,EDN2,PLAU,UBD,CALML5,LCP1,ORM2,TPD52,MS4A1,ITGAX,TMC6
GO:0030261	Chromosome condensation	7	42	1.14	0.00042	9606.ENSP00000244573,9606.ENSP00000251496,9606.ENSP00000256442,9606.ENSP00000330074,9606.ENSP00000378699,9606.ENSP00000411532,9606.ENSP00000453403	HIST1H1A,NCAPG,CCNB1,HIST1H1B,CDK1,TOP2A,NUSAP1
GO:0098542	Defense response to other organism	29	900	0.43	0.00046	9606.ENSP00000217407,9606.ENSP00000261267,9606.ENSP00000262629,9606.ENSP00000262746,9606.ENSP00000264170,9606.ENSP00000276708,9606.ENSP00000286758,9606.ENSP00000289707,9606.ENSP00000289902,9606.ENSP00000305651,9606.ENSP00000312367,9606.ENSP00000342513,9606.ENSP00000349430,9606.ENSP00000354901,9606.ENSP00000357712,9606.ENSP00000357722,9606.ENSP00000357727,9606.ENSP00000358165,9606.ENSP00000359393,…	LBP,LYZ,TYROBP,PRDX1,KYNU,GSDMC,CXCL13,SLAMF8,FCER1G,CXCL10,CD84,IFI6,HIST1H2BK,CXCL9,S100A7,S100A8,S100A9,FCGR1A,HMGB3,GBP5,HLA-DQA2,HLA-DQB1,UBD,ISG15,LY86,HLA-DRA,IFI30,ACP5,HIST1H2BJ
GO:0002275	Myeloid cell activation involved in immune response	21	522	0.53	0.00052	9606.ENSP00000199764,9606.ENSP00000217407,9606.ENSP00000236147,9606.ENSP00000236671,9606.ENSP00000250092,9606.ENSP00000259396,9606.ENSP00000261267,9606.ENSP00000262629,9606.ENSP00000271638,9606.ENSP00000289902,9606.ENSP00000296370,9606.ENSP00000354532,9606.ENSP00000357712,9606.ENSP00000357722,9606.ENSP00000357727,9606.ENSP00000361405,9606.ENSP00000361850,9606.ENSP00000369689,9606.ENSP00000394936,…	CEACAM6,LBP,SELL,CTSD,CD68,ORM1,LYZ,TYROBP,S100A11,FCER1G,S100P,PNP,S100A7,S100A8,S100A9,MMP9,PLAU,CALML5,ORM2,ITGAX,TMC6
GO:0009056	Catabolic process	49	2042	0.3	0.00052	9606.ENSP00000188790,9606.ENSP00000215743,9606.ENSP00000216117,9606.ENSP00000226444,9606.ENSP00000236671,9606.ENSP00000255084,9606.ENSP00000255695,9606.ENSP00000256442,9606.ENSP00000259938,9606.ENSP00000260302,9606.ENSP00000262746,9606.ENSP00000264170,9606.ENSP00000264228,9606.ENSP00000267814,9606.ENSP00000274192,9606.ENSP00000283871,9606.ENSP00000287275,9606.ENSP00000287598,9606.ENSP00000289004,…	FAP,MMP11,HMOX1,SULT1E1,CTSD,ALDH3B2,HRASLS2,CCNB1,CLPS,MMP13,PRDX1,KYNU,SRD5A3,SORD,SRD5A1,HGD,GLYATL2,BUB1B,HPD,PLK1,CD84,CRAT,MMP1,UBE2C,PNP,KMO,FABP7,S100A8,S100A9,PNLIPRP3,MMP9,CDC20,PGC,CLPSL1,UBD,ISG15,SDC1,HMMR,PTTG1,FABP6,SPP1,CDK1,TYMP,GGT1,TDO2,DIO2,HSD17B6,APOC2,IL4I1
GO:2000816	Negative regulation of mitotic sister chromatid separation	6	27	1.27	0.00052	9606.ENSP00000287598,9606.ENSP00000300093,9606.ENSP00000301633,9606.ENSP00000302530,9606.ENSP00000361540,9606.ENSP00000377536	BUB1B,PLK1,BIRC5,BUB1,CDC20,PTTG1
GO:0045786	Negative regulation of cell cycle	22	571	0.51	0.00055	9606.ENSP00000188790,9606.ENSP00000242208,9606.ENSP00000256442,9606.ENSP00000287598,9606.ENSP00000296522,9606.ENSP00000300093,9606.ENSP00000301633,9606.ENSP00000302530,9606.ENSP00000306512,9606.ENSP00000312995,9606.ENSP00000335357,9606.ENSP00000353770,9606.ENSP00000356432,9606.ENSP00000360316,9606.ENSP00000361540,9606.ENSP00000363055,9606.ENSP00000369530,9606.ENSP00000377536,9606.ENSP00000378699,…	FAP,INHBA,CCNB1,BUB1B,HPGD,PLK1,BIRC5,BUB1,CXCL8,CLSPN,CDKN3,RRM2,BRINP3,DHCR24,CDC20,ZWINT,ALOX15B,PTTG1,CDK1,CDC45,TOP2A,MUC1
GO:0007051	Spindle organization	11	145	0.8	0.00059	9606.ENSP00000217026,9606.ENSP00000256442,9606.ENSP00000261597,9606.ENSP00000265148,9606.ENSP00000271452,9606.ENSP00000300403,9606.ENSP00000301633,9606.ENSP00000326550,9606.ENSP00000356379,9606.ENSP00000361540,9606.ENSP00000393963	MYBL2,CCNB1,NDC80,CENPE,NUF2,TPX2,BIRC5,TACC3,ASPM,CDC20,KIFC1
GO:0009074	Aromatic amino acid family catabolic process	6	28	1.25	0.00059	9606.ENSP00000264170,9606.ENSP00000283871,9606.ENSP00000289004,9606.ENSP00000355517,9606.ENSP00000444788,9606.ENSP00000472474	KYNU,HGD,HPD,KMO,TDO2,IL4I1
GO:0043312	Neutrophil degranulation	20	484	0.54	0.00059	9606.ENSP00000199764,9606.ENSP00000236147,9606.ENSP00000236671,9606.ENSP00000250092,9606.ENSP00000259396,9606.ENSP00000261267,9606.ENSP00000262629,9606.ENSP00000271638,9606.ENSP00000289902,9606.ENSP00000296370,9606.ENSP00000354532,9606.ENSP00000357712,9606.ENSP00000357722,9606.ENSP00000357727,9606.ENSP00000361405,9606.ENSP00000361850,9606.ENSP00000369689,9606.ENSP00000394936,9606.ENSP00000454623,…	CEACAM6,SELL,CTSD,CD68,ORM1,LYZ,TYROBP,S100A11,FCER1G,S100P,PNP,S100A7,S100A8,S100A9,MMP9,PLAU,CALML5,ORM2,ITGAX,TMC6
GO:0006629	Lipid metabolic process	34	1190	0.38	0.00065	9606.ENSP00000198801,9606.ENSP00000226444,9606.ENSP00000255084,9606.ENSP00000255695,9606.ENSP00000259938,9606.ENSP00000264228,9606.ENSP00000274192,9606.ENSP00000278840,9606.ENSP00000287275,9606.ENSP00000296522,9606.ENSP00000301956,9606.ENSP00000307607,9606.ENSP00000315013,9606.ENSP00000334276,9606.ENSP00000344674,9606.ENSP00000347717,9606.ENSP00000357429,9606.ENSP00000358232,9606.ENSP00000360316,…	MOGAT2,SULT1E1,ALDH3B2,HRASLS2,CLPS,SRD5A3,SRD5A1,FADS2,GLYATL2,HPGD,ACSM1,SDR16C5,CRAT,UGT2B28,DHRS2,DHCR7,FABP7,PNLIPRP3,DHCR24,EDN2,CLPSL1,ALOX15B,SDC1,IDI1,G6PD,FABP6,SPP1,PPAPDC1A,GGT1,UGT2B11,DBI,HSD17B6,APOC1,APOC2
GO:0016043	Cellular component organization	98	5447	0.18	0.00069	9606.ENSP00000215743,9606.ENSP00000217026,9606.ENSP00000222271,9606.ENSP00000225777,9606.ENSP00000225964,9606.ENSP00000233596,9606.ENSP00000244573,9606.ENSP00000247191,9606.ENSP00000251496,9606.ENSP00000256442,9606.ENSP00000260128,9606.ENSP00000260302,9606.ENSP00000261597,9606.ENSP00000262629,9606.ENSP00000265148,9606.ENSP00000265748,9606.ENSP00000271452,9606.ENSP00000275428,9606.ENSP00000281453,…	MMP11,MYBL2,COMP,SYNGR2,COL1A1,REEP6,HIST1H1A,DLGAP5,NCAPG,CCNB1,SULF1,MMP13,NDC80,TYROBP,CENPE,ANLN,NUF2,GGCT,CENPU,THY1,BUB1B,HIST1H2BD,SLAMF8,FCER1G,PLK1,TPX2,BIRC5,TK1,BUB1,ALCAM,RND1,CBX2,CRAT,MMP1,TACC3,COL10A1,HIST1H1B,CTHRC1,HIST2H3D,CDKN3,HIST1H2AD,IFI6,FN1,UBE2C,HIST1H2BK,HIST1H2AI,HIST1H2AG,HIST1H3J,RRM2,IQGAP3,CNTNAP2,ASPM,EFNA3,HIST2H3C,HIST2H2AA,FCGR1A,COL11A1,HMGB3,GBP5,DHCR24,CEP5…
GO:0007166	Cell surface receptor signaling pathway	53	2325	0.28	0.0007	9606.ENSP00000216117,9606.ENSP00000217407,9606.ENSP00000222271,9606.ENSP00000225964,9606.ENSP00000242208,9606.ENSP00000247191,9606.ENSP00000250160,9606.ENSP00000260128,9606.ENSP00000261366,9606.ENSP00000262629,9606.ENSP00000264246,9606.ENSP00000267953,9606.ENSP00000268389,9606.ENSP00000284240,9606.ENSP00000286758,9606.ENSP00000289902,9606.ENSP00000296522,9606.ENSP00000301633,9606.ENSP00000305651,…	HMOX1,LBP,COMP,COL1A1,INHBA,DLGAP5,WISP1,SULF1,LMNB1,TYROBP,CD80,BCL2A1,IGSF6,THY1,CXCL13,FCER1G,HPGD,BIRC5,CXCL10,CXCL8,CXCL11,MUCL1,MMP1,CTHRC1,HIST2H3D,FPR3,IFI6,FN1,HIST1H3J,CXCL9,FCGR3A,EFNA3,HIST2H3C,FCGR1A,MMP9,EDN2,HLA-DQA2,HLA-DQB1,HIST1H3D,ISG15,SDC1,HLA-DRA,PPAPDC1A,LCP1,IFI30,HIST2H3A,CXCR4,LTB,FYB,MS4A1,ENSG00000258947,ITGAX,MUC1
GO:0040011	Locomotion	35	1251	0.37	0.0007	9606.ENSP00000188790,9606.ENSP00000199764,9606.ENSP00000217407,9606.ENSP00000225964,9606.ENSP00000236147,9606.ENSP00000265748,9606.ENSP00000267814,9606.ENSP00000286758,9606.ENSP00000289707,9606.ENSP00000289902,9606.ENSP00000296370,9606.ENSP00000305651,9606.ENSP00000305988,9606.ENSP00000306512,9606.ENSP00000306884,9606.ENSP00000312367,9606.ENSP00000322788,9606.ENSP00000330523,9606.ENSP00000341821,…	FAP,CEACAM6,LBP,COL1A1,SELL,ANLN,SORD,CXCL13,SLAMF8,FCER1G,S100P,CXCL10,ALCAM,CXCL8,CXCL11,CD84,MMP1,CTHRC1,FPR3,FN1,CXCL9,ASPM,EFNA3,S100A8,S100A9,EDN2,PLAU,VSTM2L,SDC1,CDK1,TYMP,LCP1,CXCR4,ENSG00000258947,ITGAX
GO:0055114	Oxidation-reduction process	29	939	0.41	0.00082	9606.ENSP00000216117,9606.ENSP00000250457,9606.ENSP00000255084,9606.ENSP00000262746,9606.ENSP00000264228,9606.ENSP00000267814,9606.ENSP00000274192,9606.ENSP00000278840,9606.ENSP00000283871,9606.ENSP00000289004,9606.ENSP00000296522,9606.ENSP00000301956,9606.ENSP00000307607,9606.ENSP00000315013,9606.ENSP00000331897,9606.ENSP00000344674,9606.ENSP00000347717,9606.ENSP00000353770,9606.ENSP00000355517,…	HMOX1,EGLN3,ALDH3B2,PRDX1,SRD5A3,SORD,SRD5A1,FADS2,HGD,HPD,HPGD,ACSM1,SDR16C5,CRAT,IDH2,DHRS2,DHCR7,RRM2,KMO,DHCR24,ALOX15B,G6PD,IFI30,PYCR1,TSTA3,TDO2,DIO2,HSD17B6,IL4I1
GO:0002443	Leukocyte mediated immunity	23	641	0.48	0.00086	9606.ENSP00000199764,9606.ENSP00000236147,9606.ENSP00000236671,9606.ENSP00000250092,9606.ENSP00000259396,9606.ENSP00000261267,9606.ENSP00000262629,9606.ENSP00000262746,9606.ENSP00000271638,9606.ENSP00000289902,9606.ENSP00000296370,9606.ENSP00000354532,9606.ENSP00000357712,9606.ENSP00000357722,9606.ENSP00000357727,9606.ENSP00000361405,9606.ENSP00000361850,9606.ENSP00000364080,9606.ENSP00000369689,…	CEACAM6,SELL,CTSD,CD68,ORM1,LYZ,TYROBP,PRDX1,S100A11,FCER1G,S100P,PNP,S100A7,S100A8,S100A9,MMP9,PLAU,HLA-DQB1,CALML5,ORM2,TSTA3,ITGAX,TMC6
GO:0019886	Antigen processing and presentation of exogenous peptide antigen via mhc class ii	9	96	0.89	0.00086	9606.ENSP00000236671,9606.ENSP00000265148,9606.ENSP00000289902,9606.ENSP00000361298,9606.ENSP00000364076,9606.ENSP00000364080,9606.ENSP00000378786,9606.ENSP00000384886,9606.ENSP00000398890	CTSD,CENPE,FCER1G,KIF2C,HLA-DQA2,HLA-DQB1,HLA-DRA,IFI30,HLA-DMB
GO:1901990	Regulation of mitotic cell cycle phase transition	18	416	0.56	0.00086	9606.ENSP00000247191,9606.ENSP00000256442,9606.ENSP00000261597,9606.ENSP00000265148,9606.ENSP00000265748,9606.ENSP00000287598,9606.ENSP00000300093,9606.ENSP00000300403,9606.ENSP00000301633,9606.ENSP00000302530,9606.ENSP00000312995,9606.ENSP00000348838,9606.ENSP00000361540,9606.ENSP00000366249,9606.ENSP00000377492,9606.ENSP00000378699,9606.ENSP00000405726,9606.ENSP00000484824	DLGAP5,CCNB1,NDC80,CENPE,ANLN,BUB1B,PLK1,TPX2,BIRC5,BUB1,CLSPN,UBE2C,CDC20,UBD,HMMR,CDK1,CDC45,MUC1
GO:0016477	Cell migration	28	896	0.42	0.00093	9606.ENSP00000188790,9606.ENSP00000199764,9606.ENSP00000217407,9606.ENSP00000225964,9606.ENSP00000236147,9606.ENSP00000265748,9606.ENSP00000286758,9606.ENSP00000289707,9606.ENSP00000289902,9606.ENSP00000296370,9606.ENSP00000305651,9606.ENSP00000306512,9606.ENSP00000306884,9606.ENSP00000312367,9606.ENSP00000322788,9606.ENSP00000330523,9606.ENSP00000346839,9606.ENSP00000354901,9606.ENSP00000356379,…	FAP,CEACAM6,LBP,COL1A1,SELL,ANLN,CXCL13,SLAMF8,FCER1G,S100P,CXCL10,CXCL8,CXCL11,CD84,MMP1,CTHRC1,FN1,CXCL9,ASPM,S100A8,S100A9,EDN2,PLAU,SDC1,CDK1,LCP1,CXCR4,ITGAX
GO:0001906	Cell killing	10	126	0.82	0.00094	9606.ENSP00000261267,9606.ENSP00000262746,9606.ENSP00000286758,9606.ENSP00000305651,9606.ENSP00000306512,9606.ENSP00000306884,9606.ENSP00000349430,9606.ENSP00000354901,9606.ENSP00000398803,9606.ENSP00000476136	LYZ,PRDX1,CXCL13,CXCL10,CXCL8,CXCL11,HIST1H2BK,CXCL9,TSTA3,HIST1H2BJ
GO:0007093	Mitotic cell cycle checkpoint	11	156	0.77	0.00094	9606.ENSP00000256442,9606.ENSP00000287598,9606.ENSP00000300093,9606.ENSP00000301633,9606.ENSP00000302530,9606.ENSP00000312995,9606.ENSP00000361540,9606.ENSP00000363055,9606.ENSP00000378699,9606.ENSP00000411532,9606.ENSP00000484824	CCNB1,BUB1B,PLK1,BIRC5,BUB1,CLSPN,CDC20,ZWINT,CDK1,TOP2A,MUC1
GO:0044281	Small molecule metabolic process	42	1684	0.32	0.00094	9606.ENSP00000198801,9606.ENSP00000226444,9606.ENSP00000255084,9606.ENSP00000264170,9606.ENSP00000264228,9606.ENSP00000267814,9606.ENSP00000274192,9606.ENSP00000278840,9606.ENSP00000283871,9606.ENSP00000287275,9606.ENSP00000289004,9606.ENSP00000296522,9606.ENSP00000300079,9606.ENSP00000301634,9606.ENSP00000301956,9606.ENSP00000307607,9606.ENSP00000309270,9606.ENSP00000315013,9606.ENSP00000331897,…	MOGAT2,SULT1E1,ALDH3B2,KYNU,SRD5A3,SORD,SRD5A1,FADS2,HGD,GLYATL2,HPD,HPGD,GLYATL1,TK1,ACSM1,SDR16C5,CHST1,CRAT,IDH2,UGT2B28,DHCR7,RRM2,PNP,KMO,DHCR24,EDN2,ALOX15B,IDI1,G6PD,HMMR,TYMP,GGT1,PYCR1,UGT2B11,TSTA3,DDC,SEPHS2,DBI,TDO2,APOC1,ACP5,IL4I1
GO:0051303	Establishment of chromosome localization	8	73	0.96	0.00094	9606.ENSP00000247191,9606.ENSP00000256442,9606.ENSP00000261597,9606.ENSP00000265148,9606.ENSP00000271452,9606.ENSP00000301633,9606.ENSP00000361298,9606.ENSP00000393963	DLGAP5,CCNB1,NDC80,CENPE,NUF2,BIRC5,KIF2C,KIFC1
GO:0019730	Antimicrobial humoral response	11	160	0.76	0.0011	9606.ENSP00000261267,9606.ENSP00000286758,9606.ENSP00000305651,9606.ENSP00000306512,9606.ENSP00000306884,9606.ENSP00000349430,9606.ENSP00000354901,9606.ENSP00000357712,9606.ENSP00000357722,9606.ENSP00000357727,9606.ENSP00000476136	LYZ,CXCL13,CXCL10,CXCL8,CXCL11,HIST1H2BK,CXCL9,S100A7,S100A8,S100A9,HIST1H2BJ
GO:0010564	Regulation of cell cycle process	25	760	0.44	0.0012	9606.ENSP00000188790,9606.ENSP00000247191,9606.ENSP00000256442,9606.ENSP00000261597,9606.ENSP00000262300,9606.ENSP00000265148,9606.ENSP00000265748,9606.ENSP00000287598,9606.ENSP00000300093,9606.ENSP00000300403,9606.ENSP00000301633,9606.ENSP00000302530,9606.ENSP00000312995,9606.ENSP00000326550,9606.ENSP00000348838,9606.ENSP00000353770,9606.ENSP00000357643,9606.ENSP00000361540,9606.ENSP00000366249,…	FAP,DLGAP5,CCNB1,NDC80,PKMYT1,CENPE,ANLN,BUB1B,PLK1,TPX2,BIRC5,BUB1,CLSPN,TACC3,UBE2C,RRM2,MKI67,CDC20,UBD,HMMR,PTTG1,CDK1,CDC45,NUSAP1,MUC1
GO:0030335	Positive regulation of cell migration	20	522	0.51	0.0012	9606.ENSP00000199764,9606.ENSP00000216117,9606.ENSP00000217407,9606.ENSP00000225964,9606.ENSP00000250160,9606.ENSP00000271638,9606.ENSP00000284240,9606.ENSP00000286758,9606.ENSP00000305651,9606.ENSP00000306512,9606.ENSP00000346839,9606.ENSP00000357712,9606.ENSP00000361405,9606.ENSP00000361668,9606.ENSP00000361850,9606.ENSP00000369071,9606.ENSP00000386884,9606.ENSP00000398803,9606.ENSP00000413707,…	CEACAM6,HMOX1,LBP,COL1A1,WISP1,S100A11,THY1,CXCL13,CXCL10,CXCL8,FN1,S100A7,MMP9,EDN2,PLAU,POSTN,CXCR4,TSTA3,LRRC15,ITGAX
GO:0045814	Negative regulation of gene expression, epigenetic	9	103	0.86	0.0012	9606.ENSP00000333277,9606.ENSP00000341094,9606.ENSP00000351589,9606.ENSP00000352119,9606.ENSP00000352252,9606.ENSP00000358154,9606.ENSP00000358155,9606.ENSP00000366999,9606.ENSP00000385479	HIST2H3D,HIST1H2AD,HIST1H2AI,HIST1H2AG,HIST1H3J,HIST2H3C,HIST2H2AA,HIST1H3D,HIST2H3A
GO:0048519	Negative regulation of biological process	96	5389	0.17	0.0012	9606.ENSP00000188790,9606.ENSP00000199764,9606.ENSP00000215743,9606.ENSP00000216117,9606.ENSP00000217407,9606.ENSP00000222271,9606.ENSP00000225964,9606.ENSP00000231009,9606.ENSP00000242208,9606.ENSP00000244573,9606.ENSP00000250092,9606.ENSP00000250160,9606.ENSP00000251864,9606.ENSP00000256412,9606.ENSP00000256442,9606.ENSP00000259396,9606.ENSP00000260128,9606.ENSP00000262300,9606.ENSP00000262629,…	FAP,CEACAM6,MMP11,HMOX1,LBP,COMP,COL1A1,GZMK,INHBA,HIST1H1A,CD68,WISP1,TDRD1,ADAMDEC1,CCNB1,ORM1,SULF1,PKMYT1,TYROBP,CD80,TFEC,BCL2A1,S100A11,THY1,SAMSN1,CXCL13,BUB1B,SLAMF8,FCER1G,HPGD,PLK1,TPX2,BIRC5,BUB1,CXCL10,CST1,CXCL8,SDR16C5,RND1,CBX2,CD84,CLSPN,HIST1H1B,CTHRC1,IDH2,HIST2H3D,CDKN3,HIST1H2AD,IFI6,DHRS2,FN1,HIST1H2AI,HIST1H2AG,HIST1H3J,RRM2,IQGAP3,ASPM,RGS1,BRINP3,EFNA3,FABP7,HIST2H3C,HIST2…
GO:0000075	Cell cycle checkpoint	12	198	0.7	0.0013	9606.ENSP00000256442,9606.ENSP00000287598,9606.ENSP00000300093,9606.ENSP00000301633,9606.ENSP00000302530,9606.ENSP00000312995,9606.ENSP00000361540,9606.ENSP00000363055,9606.ENSP00000378699,9606.ENSP00000405726,9606.ENSP00000411532,9606.ENSP00000484824	CCNB1,BUB1B,PLK1,BIRC5,BUB1,CLSPN,CDC20,ZWINT,CDK1,CDC45,TOP2A,MUC1
GO:0032496	Response to lipopolysaccharide	15	313	0.6	0.0014	9606.ENSP00000217407,9606.ENSP00000250092,9606.ENSP00000264246,9606.ENSP00000286758,9606.ENSP00000296522,9606.ENSP00000305651,9606.ENSP00000306512,9606.ENSP00000306884,9606.ENSP00000354901,9606.ENSP00000355517,9606.ENSP00000357712,9606.ENSP00000357722,9606.ENSP00000372295,9606.ENSP00000383232,9606.ENSP00000468767	LBP,CD68,CD80,CXCL13,HPGD,CXCL10,CXCL8,CXCL11,CXCL9,KMO,S100A7,S100A8,GJB2,GGT1,ACP5
GO:0002366	Leukocyte activation involved in immune response	22	626	0.47	0.0015	9606.ENSP00000199764,9606.ENSP00000217407,9606.ENSP00000236147,9606.ENSP00000236671,9606.ENSP00000250092,9606.ENSP00000259396,9606.ENSP00000261267,9606.ENSP00000262629,9606.ENSP00000271638,9606.ENSP00000289902,9606.ENSP00000296370,9606.ENSP00000354532,9606.ENSP00000357712,9606.ENSP00000357722,9606.ENSP00000357727,9606.ENSP00000361405,9606.ENSP00000361850,9606.ENSP00000369689,9606.ENSP00000381581,…	CEACAM6,LBP,SELL,CTSD,CD68,ORM1,LYZ,TYROBP,S100A11,FCER1G,S100P,PNP,S100A7,S100A8,S100A9,MMP9,PLAU,CALML5,LCP1,ORM2,ITGAX,TMC6
GO:0065007	Biological regulation	177	12171	0.08	0.0015	9606.ENSP00000188790,9606.ENSP00000199764,9606.ENSP00000215743,9606.ENSP00000216117,9606.ENSP00000217026,9606.ENSP00000217407,9606.ENSP00000222271,9606.ENSP00000225964,9606.ENSP00000226444,9606.ENSP00000231009,9606.ENSP00000233596,9606.ENSP00000236147,9606.ENSP00000236671,9606.ENSP00000242208,9606.ENSP00000244573,9606.ENSP00000247191,9606.ENSP00000250092,9606.ENSP00000250160,9606.ENSP00000250457,…	FAP,CEACAM6,MMP11,HMOX1,MYBL2,LBP,COMP,COL1A1,SULT1E1,GZMK,REEP6,SELL,CTSD,INHBA,HIST1H1A,DLGAP5,CD68,WISP1,EGLN3,TDRD1,ADAMDEC1,CCNB1,ORM1,CLPS,SULF1,LYZ,LMNB1,NDC80,PKMYT1,TYROBP,PRDX1,SRD5A3,CD80,CENPE,TFEC,ANLN,BCL2A1,IGSF6,S100A11,ABCA12,SRD5A1,GGCT,THY1,SAMSN1,CXCL13,BUB1B,SLAMF8,FCER1G,HPGD,AQP3,PLK1,TPX2,BIRC5,ACSM1,BUB1,CXCL10,CST1,ALCAM,CXCL8,CXCL11,SDR16C5,RND1,CBX2,MUCL1,CD84,CLSPN,MM…
GO:0097549	Chromatin organization involved in negative regulation of transcription	9	108	0.84	0.0016	9606.ENSP00000333277,9606.ENSP00000341094,9606.ENSP00000351589,9606.ENSP00000352119,9606.ENSP00000352252,9606.ENSP00000358154,9606.ENSP00000358155,9606.ENSP00000366999,9606.ENSP00000385479	HIST2H3D,HIST1H2AD,HIST1H2AI,HIST1H2AG,HIST1H3J,HIST2H3C,HIST2H2AA,HIST1H3D,HIST2H3A
GO:2001251	Negative regulation of chromosome organization	10	137	0.79	0.0016	9606.ENSP00000244573,9606.ENSP00000287598,9606.ENSP00000300093,9606.ENSP00000301633,9606.ENSP00000302530,9606.ENSP00000307607,9606.ENSP00000330074,9606.ENSP00000361540,9606.ENSP00000377536,9606.ENSP00000411532	HIST1H1A,BUB1B,PLK1,BIRC5,BUB1,SDR16C5,HIST1H1B,CDC20,PTTG1,TOP2A
GO:0006928	Movement of cell or subcellular component	38	1501	0.33	0.0017	9606.ENSP00000188790,9606.ENSP00000199764,9606.ENSP00000217407,9606.ENSP00000225964,9606.ENSP00000236147,9606.ENSP00000247191,9606.ENSP00000265148,9606.ENSP00000265748,9606.ENSP00000267814,9606.ENSP00000286758,9606.ENSP00000289707,9606.ENSP00000289902,9606.ENSP00000296370,9606.ENSP00000305651,9606.ENSP00000305988,9606.ENSP00000306512,9606.ENSP00000306884,9606.ENSP00000312367,9606.ENSP00000322788,…	FAP,CEACAM6,LBP,COL1A1,SELL,DLGAP5,CENPE,ANLN,SORD,CXCL13,SLAMF8,FCER1G,S100P,CXCL10,ALCAM,CXCL8,CXCL11,CD84,MMP1,CTHRC1,FN1,CXCL9,ASPM,EFNA3,S100A8,S100A9,KIF2C,EDN2,PLAU,VSTM2L,SDC1,CDK1,CCDC64,LCP1,CXCR4,KIFC1,ENSG00000258947,ITGAX
GO:0048523	Negative regulation of cellular process	88	4874	0.18	0.002	9606.ENSP00000188790,9606.ENSP00000199764,9606.ENSP00000215743,9606.ENSP00000216117,9606.ENSP00000222271,9606.ENSP00000225964,9606.ENSP00000242208,9606.ENSP00000244573,9606.ENSP00000250160,9606.ENSP00000256412,9606.ENSP00000256442,9606.ENSP00000260128,9606.ENSP00000262300,9606.ENSP00000262629,9606.ENSP00000264246,9606.ENSP00000265440,9606.ENSP00000267953,9606.ENSP00000271638,9606.ENSP00000284240,…	FAP,CEACAM6,MMP11,HMOX1,COMP,COL1A1,INHBA,HIST1H1A,WISP1,ADAMDEC1,CCNB1,SULF1,PKMYT1,TYROBP,CD80,TFEC,BCL2A1,S100A11,THY1,SAMSN1,CXCL13,BUB1B,SLAMF8,FCER1G,HPGD,PLK1,TPX2,BIRC5,BUB1,CXCL10,CST1,CXCL8,SDR16C5,RND1,CBX2,CD84,CLSPN,HIST1H1B,CTHRC1,IDH2,HIST2H3D,CDKN3,HIST1H2AD,IFI6,DHRS2,FN1,HIST1H2AI,HIST1H2AG,HIST1H3J,RRM2,ASPM,RGS1,BRINP3,FABP7,HIST2H3C,HIST2H2AA,HMGB3,DHCR24,MMP9,CDC20,VSTM2L,ZW…
GO:0050776	Regulation of immune response	27	896	0.4	0.002	9606.ENSP00000216117,9606.ENSP00000217407,9606.ENSP00000225964,9606.ENSP00000236147,9606.ENSP00000262629,9606.ENSP00000264246,9606.ENSP00000284240,9606.ENSP00000285670,9606.ENSP00000286758,9606.ENSP00000289707,9606.ENSP00000289902,9606.ENSP00000311364,9606.ENSP00000312367,9606.ENSP00000341821,9606.ENSP00000356946,9606.ENSP00000358165,9606.ENSP00000359393,9606.ENSP00000359488,9606.ENSP00000362116,…	HMOX1,LBP,COL1A1,SELL,TYROBP,CD80,THY1,SAMSN1,CXCL13,SLAMF8,FCER1G,MUCL1,CD84,FPR3,FCGR3A,FCGR1A,HMGB3,GBP5,PGC,HLA-DQA2,HLA-DQB1,HLA-DRA,PPAPDC1A,HLA-DMB,FYB,MS4A1,MUC1
GO:0061844	Antimicrobial humoral immune response mediated by antimicrobial peptide	9	113	0.82	0.0021	9606.ENSP00000286758,9606.ENSP00000305651,9606.ENSP00000306512,9606.ENSP00000306884,9606.ENSP00000349430,9606.ENSP00000354901,9606.ENSP00000357712,9606.ENSP00000357727,9606.ENSP00000476136	CXCL13,CXCL10,CXCL8,CXCL11,HIST1H2BK,CXCL9,S100A7,S100A9,HIST1H2BJ
GO:0042127	Regulation of cell population proliferation	40	1642	0.31	0.0022	9606.ENSP00000188790,9606.ENSP00000199764,9606.ENSP00000216117,9606.ENSP00000222271,9606.ENSP00000242208,9606.ENSP00000250160,9606.ENSP00000250457,9606.ENSP00000256442,9606.ENSP00000260128,9606.ENSP00000262629,9606.ENSP00000264246,9606.ENSP00000271638,9606.ENSP00000296522,9606.ENSP00000301633,9606.ENSP00000305651,9606.ENSP00000306512,9606.ENSP00000306884,9606.ENSP00000330523,9606.ENSP00000331897,…	FAP,CEACAM6,HMOX1,COMP,INHBA,WISP1,EGLN3,CCNB1,SULF1,TYROBP,CD80,S100A11,HPGD,BIRC5,CXCL10,CXCL8,CXCL11,CTHRC1,IDH2,CDKN3,DHRS2,FN1,DHCR7,IQGAP3,PNP,CXCL9,ASPM,FABP7,DHCR24,MMP9,CDC20,EDN2,PLAU,ALOX15B,ESM1,FABP6,CDK1,ACE2,HLA-DMB,ITGAX
GO:0045055	Regulated exocytosis	23	697	0.44	0.0022	9606.ENSP00000199764,9606.ENSP00000225777,9606.ENSP00000236147,9606.ENSP00000236671,9606.ENSP00000250092,9606.ENSP00000259396,9606.ENSP00000261267,9606.ENSP00000262629,9606.ENSP00000271638,9606.ENSP00000272895,9606.ENSP00000289902,9606.ENSP00000296370,9606.ENSP00000346839,9606.ENSP00000354532,9606.ENSP00000357712,9606.ENSP00000357722,9606.ENSP00000357727,9606.ENSP00000361405,9606.ENSP00000361850,…	CEACAM6,SYNGR2,SELL,CTSD,CD68,ORM1,LYZ,TYROBP,S100A11,ABCA12,FCER1G,S100P,FN1,PNP,S100A7,S100A8,S100A9,MMP9,PLAU,CALML5,ORM2,ITGAX,TMC6
GO:0048518	Positive regulation of biological process	104	6112	0.15	0.0023	9606.ENSP00000188790,9606.ENSP00000199764,9606.ENSP00000216117,9606.ENSP00000217026,9606.ENSP00000217407,9606.ENSP00000222271,9606.ENSP00000225964,9606.ENSP00000226444,9606.ENSP00000231009,9606.ENSP00000236671,9606.ENSP00000242208,9606.ENSP00000244573,9606.ENSP00000247191,9606.ENSP00000250160,9606.ENSP00000250457,9606.ENSP00000256442,9606.ENSP00000259396,9606.ENSP00000260128,9606.ENSP00000261597,…	FAP,CEACAM6,HMOX1,MYBL2,LBP,COMP,COL1A1,SULT1E1,GZMK,CTSD,INHBA,HIST1H1A,DLGAP5,WISP1,EGLN3,CCNB1,ORM1,SULF1,NDC80,TYROBP,CD80,CENPE,TFEC,ANLN,S100A11,ABCA12,THY1,CXCL13,FCER1G,HPGD,AQP3,PLK1,TPX2,BIRC5,CXCL10,CXCL8,CXCL11,SDR16C5,MUCL1,CD84,CLSPN,MMP1,HIST1H1B,CTHRC1,FPR3,FN1,UBE2C,IQGAP3,PNP,CXCL9,KMO,ASPM,BRINP3,FCGR3A,EFNA3,S100A7,S100A8,S100A9,FCGR1A,EPS8L3,HMGB3,GBP5,MMP9,CDC20,EDN2,PLAU,PG…
GO:0007094	Mitotic spindle assembly checkpoint	5	23	1.26	0.0024	9606.ENSP00000287598,9606.ENSP00000300093,9606.ENSP00000301633,9606.ENSP00000302530,9606.ENSP00000361540	BUB1B,PLK1,BIRC5,BUB1,CDC20
GO:0048870	Cell motility	29	1018	0.38	0.0024	9606.ENSP00000188790,9606.ENSP00000199764,9606.ENSP00000217407,9606.ENSP00000225964,9606.ENSP00000236147,9606.ENSP00000265748,9606.ENSP00000267814,9606.ENSP00000286758,9606.ENSP00000289707,9606.ENSP00000289902,9606.ENSP00000296370,9606.ENSP00000305651,9606.ENSP00000306512,9606.ENSP00000306884,9606.ENSP00000312367,9606.ENSP00000322788,9606.ENSP00000330523,9606.ENSP00000346839,9606.ENSP00000354901,…	FAP,CEACAM6,LBP,COL1A1,SELL,ANLN,SORD,CXCL13,SLAMF8,FCER1G,S100P,CXCL10,CXCL8,CXCL11,CD84,MMP1,CTHRC1,FN1,CXCL9,ASPM,S100A8,S100A9,EDN2,PLAU,SDC1,CDK1,LCP1,CXCR4,ITGAX
GO:0016042	Lipid catabolic process	14	294	0.6	0.0025	9606.ENSP00000226444,9606.ENSP00000255695,9606.ENSP00000259938,9606.ENSP00000264228,9606.ENSP00000274192,9606.ENSP00000287275,9606.ENSP00000315013,9606.ENSP00000357429,9606.ENSP00000358232,9606.ENSP00000362968,9606.ENSP00000377549,9606.ENSP00000378517,9606.ENSP00000451406,9606.ENSP00000466775	SULT1E1,HRASLS2,CLPS,SRD5A3,SRD5A1,GLYATL2,CRAT,FABP7,PNLIPRP3,CLPSL1,FABP6,SPP1,HSD17B6,APOC2
GO:0008202	Steroid metabolic process	13	256	0.63	0.0026	9606.ENSP00000226444,9606.ENSP00000264228,9606.ENSP00000274192,9606.ENSP00000334276,9606.ENSP00000344674,9606.ENSP00000347717,9606.ENSP00000360316,9606.ENSP00000370748,9606.ENSP00000377192,9606.ENSP00000378517,9606.ENSP00000387683,9606.ENSP00000451406,9606.ENSP00000465356	SULT1E1,SRD5A3,SRD5A1,UGT2B28,DHRS2,DHCR7,DHCR24,IDI1,G6PD,SPP1,UGT2B11,HSD17B6,APOC1
GO:0042430	Indole-containing compound metabolic process	5	24	1.24	0.0026	9606.ENSP00000264170,9606.ENSP00000274192,9606.ENSP00000355517,9606.ENSP00000403644,9606.ENSP00000444788	KYNU,SRD5A1,KMO,DDC,TDO2
GO:0030198	Extracellular matrix organization	15	338	0.57	0.0027	9606.ENSP00000215743,9606.ENSP00000222271,9606.ENSP00000225964,9606.ENSP00000260128,9606.ENSP00000260302,9606.ENSP00000322788,9606.ENSP00000327368,9606.ENSP00000346839,9606.ENSP00000359114,9606.ENSP00000361405,9606.ENSP00000369071,9606.ENSP00000378517,9606.ENSP00000381581,9606.ENSP00000424571,9606.ENSP00000454623	MMP11,COMP,COL1A1,SULF1,MMP13,MMP1,COL10A1,FN1,COL11A1,MMP9,POSTN,SPP1,LCP1,FBN2,ITGAX
GO:0031640	Killing of cells of other organism	8	91	0.87	0.0028	9606.ENSP00000261267,9606.ENSP00000286758,9606.ENSP00000305651,9606.ENSP00000306512,9606.ENSP00000306884,9606.ENSP00000349430,9606.ENSP00000354901,9606.ENSP00000476136	LYZ,CXCL13,CXCL10,CXCL8,CXCL11,HIST1H2BK,CXCL9,HIST1H2BJ
GO:0051315	Attachment of mitotic spindle microtubules to kinetochore	4	11	1.48	0.0029	9606.ENSP00000261597,9606.ENSP00000265148,9606.ENSP00000271452,9606.ENSP00000361298	NDC80,CENPE,NUF2,KIF2C
GO:0007080	Mitotic metaphase plate congression	6	44	1.06	0.0032	9606.ENSP00000256442,9606.ENSP00000261597,9606.ENSP00000265148,9606.ENSP00000271452,9606.ENSP00000361298,9606.ENSP00000393963	CCNB1,NDC80,CENPE,NUF2,KIF2C,KIFC1
GO:1901575	Organic substance catabolic process	41	1750	0.29	0.0035	9606.ENSP00000188790,9606.ENSP00000216117,9606.ENSP00000226444,9606.ENSP00000236671,9606.ENSP00000255084,9606.ENSP00000255695,9606.ENSP00000256442,9606.ENSP00000259938,9606.ENSP00000264170,9606.ENSP00000264228,9606.ENSP00000267814,9606.ENSP00000274192,9606.ENSP00000283871,9606.ENSP00000287275,9606.ENSP00000287598,9606.ENSP00000289004,9606.ENSP00000300093,9606.ENSP00000315013,9606.ENSP00000348838,…	FAP,HMOX1,SULT1E1,CTSD,ALDH3B2,HRASLS2,CCNB1,CLPS,KYNU,SRD5A3,SORD,SRD5A1,HGD,GLYATL2,BUB1B,HPD,PLK1,CRAT,UBE2C,PNP,KMO,FABP7,PNLIPRP3,CDC20,PGC,CLPSL1,UBD,ISG15,SDC1,HMMR,PTTG1,FABP6,SPP1,CDK1,TYMP,GGT1,TDO2,DIO2,HSD17B6,APOC2,IL4I1
GO:0045930	Negative regulation of mitotic cell cycle	14	308	0.58	0.0037	9606.ENSP00000188790,9606.ENSP00000256442,9606.ENSP00000287598,9606.ENSP00000300093,9606.ENSP00000301633,9606.ENSP00000302530,9606.ENSP00000312995,9606.ENSP00000356432,9606.ENSP00000361540,9606.ENSP00000363055,9606.ENSP00000377536,9606.ENSP00000378699,9606.ENSP00000411532,9606.ENSP00000484824	FAP,CCNB1,BUB1B,PLK1,BIRC5,BUB1,CLSPN,BRINP3,CDC20,ZWINT,PTTG1,CDK1,TOP2A,MUC1
GO:0042445	Hormone metabolic process	11	194	0.68	0.004	9606.ENSP00000226444,9606.ENSP00000264228,9606.ENSP00000274192,9606.ENSP00000307607,9606.ENSP00000344674,9606.ENSP00000347717,9606.ENSP00000378517,9606.ENSP00000387683,9606.ENSP00000389326,9606.ENSP00000450980,9606.ENSP00000451406	SULT1E1,SRD5A3,SRD5A1,SDR16C5,DHRS2,DHCR7,SPP1,UGT2B11,ACE2,DIO2,HSD17B6
GO:0006959	Humoral immune response	13	275	0.6	0.0047	9606.ENSP00000261267,9606.ENSP00000286758,9606.ENSP00000305651,9606.ENSP00000306512,9606.ENSP00000306884,9606.ENSP00000349430,9606.ENSP00000354901,9606.ENSP00000357712,9606.ENSP00000357722,9606.ENSP00000357727,9606.ENSP00000364080,9606.ENSP00000433277,9606.ENSP00000476136	LYZ,CXCL13,CXCL10,CXCL8,CXCL11,HIST1H2BK,CXCL9,S100A7,S100A8,S100A9,HLA-DQB1,MS4A1,HIST1H2BJ
GO:0050789	Regulation of biological process	167	11475	0.09	0.0047	9606.ENSP00000188790,9606.ENSP00000199764,9606.ENSP00000215743,9606.ENSP00000216117,9606.ENSP00000217026,9606.ENSP00000217407,9606.ENSP00000222271,9606.ENSP00000225964,9606.ENSP00000226444,9606.ENSP00000231009,9606.ENSP00000233596,9606.ENSP00000236147,9606.ENSP00000236671,9606.ENSP00000242208,9606.ENSP00000244573,9606.ENSP00000247191,9606.ENSP00000250092,9606.ENSP00000250160,9606.ENSP00000250457,…	FAP,CEACAM6,MMP11,HMOX1,MYBL2,LBP,COMP,COL1A1,SULT1E1,GZMK,REEP6,SELL,CTSD,INHBA,HIST1H1A,DLGAP5,CD68,WISP1,EGLN3,TDRD1,ADAMDEC1,CCNB1,ORM1,SULF1,LMNB1,NDC80,PKMYT1,TYROBP,PRDX1,CD80,CENPE,TFEC,ANLN,BCL2A1,IGSF6,S100A11,ABCA12,GGCT,THY1,SAMSN1,CXCL13,BUB1B,SLAMF8,FCER1G,HPGD,AQP3,PLK1,TPX2,BIRC5,BUB1,CXCL10,CST1,ALCAM,CXCL8,CXCL11,SDR16C5,RND1,CBX2,MUCL1,CD84,CLSPN,MMP1,TACC3,HIST1H1B,CTHRC1,IDH2…
GO:0006935	Chemotaxis	19	545	0.46	0.005	9606.ENSP00000217407,9606.ENSP00000286758,9606.ENSP00000289707,9606.ENSP00000289902,9606.ENSP00000305651,9606.ENSP00000305988,9606.ENSP00000306512,9606.ENSP00000306884,9606.ENSP00000341821,9606.ENSP00000354901,9606.ENSP00000357393,9606.ENSP00000357722,9606.ENSP00000357727,9606.ENSP00000361668,9606.ENSP00000361850,9606.ENSP00000362560,9606.ENSP00000379038,9606.ENSP00000386884,9606.ENSP00000451560	LBP,CXCL13,SLAMF8,FCER1G,CXCL10,ALCAM,CXCL8,CXCL11,FPR3,CXCL9,EFNA3,S100A8,S100A9,EDN2,PLAU,VSTM2L,TYMP,CXCR4,ENSG00000258947
GO:0042742	Defense response to bacterium	13	277	0.59	0.005	9606.ENSP00000217407,9606.ENSP00000261267,9606.ENSP00000276708,9606.ENSP00000286758,9606.ENSP00000289707,9606.ENSP00000289902,9606.ENSP00000349430,9606.ENSP00000357712,9606.ENSP00000357722,9606.ENSP00000357727,9606.ENSP00000368699,9606.ENSP00000468767,9606.ENSP00000476136	LBP,LYZ,GSDMC,CXCL13,SLAMF8,FCER1G,HIST1H2BK,S100A7,S100A8,S100A9,ISG15,ACP5,HIST1H2BJ
GO:0040029	Regulation of gene expression, epigenetic	11	202	0.66	0.0054	9606.ENSP00000244573,9606.ENSP00000330074,9606.ENSP00000333277,9606.ENSP00000341094,9606.ENSP00000351589,9606.ENSP00000352119,9606.ENSP00000352252,9606.ENSP00000358154,9606.ENSP00000358155,9606.ENSP00000366999,9606.ENSP00000385479	HIST1H1A,HIST1H1B,HIST2H3D,HIST1H2AD,HIST1H2AI,HIST1H2AG,HIST1H3J,HIST2H3C,HIST2H2AA,HIST1H3D,HIST2H3A
GO:0044772	Mitotic cell cycle phase transition	13	280	0.59	0.0054	9606.ENSP00000242208,9606.ENSP00000256442,9606.ENSP00000262300,9606.ENSP00000300093,9606.ENSP00000301633,9606.ENSP00000326550,9606.ENSP00000335357,9606.ENSP00000348838,9606.ENSP00000353770,9606.ENSP00000354451,9606.ENSP00000364976,9606.ENSP00000378699,9606.ENSP00000405726	INHBA,CCNB1,PKMYT1,PLK1,BIRC5,TACC3,CDKN3,UBE2C,RRM2,IQGAP3,CKS2,CDK1,CDC45
GO:0071310	Cellular response to organic substance	50	2369	0.25	0.0056	9606.ENSP00000216117,9606.ENSP00000217026,9606.ENSP00000217407,9606.ENSP00000222271,9606.ENSP00000225964,9606.ENSP00000242208,9606.ENSP00000250092,9606.ENSP00000256442,9606.ENSP00000261366,9606.ENSP00000264246,9606.ENSP00000274192,9606.ENSP00000286758,9606.ENSP00000289902,9606.ENSP00000294507,9606.ENSP00000296522,9606.ENSP00000301633,9606.ENSP00000305651,9606.ENSP00000306512,9606.ENSP00000306884,…	HMOX1,MYBL2,LBP,COMP,COL1A1,INHBA,CD68,CCNB1,LMNB1,CD80,SRD5A1,CXCL13,FCER1G,LAPTM5,HPGD,BIRC5,CXCL10,CXCL8,CXCL11,MMP1,HIST2H3D,IFI6,FN1,HIST1H3J,IQGAP3,CXCL9,KMO,BRINP3,HIST2H3C,FCGR1A,GBP5,MMP9,EDN2,HLA-DQA2,HLA-DQB1,HIST1H3D,ISG15,POSTN,SDC1,GJB2,SPP1,HLA-DRA,LCP1,IFI30,HIST2H3A,CXCR4,DDC,LTB,ITGAX,MUC1
GO:0045087	Innate immune response	22	703	0.42	0.0057	9606.ENSP00000217407,9606.ENSP00000262629,9606.ENSP00000262746,9606.ENSP00000264170,9606.ENSP00000289902,9606.ENSP00000312367,9606.ENSP00000342513,9606.ENSP00000349430,9606.ENSP00000357712,9606.ENSP00000357722,9606.ENSP00000357727,9606.ENSP00000358165,9606.ENSP00000359393,9606.ENSP00000359488,9606.ENSP00000364076,9606.ENSP00000364080,9606.ENSP00000366249,9606.ENSP00000368699,9606.ENSP00000369286,…	LBP,TYROBP,PRDX1,KYNU,FCER1G,CD84,IFI6,HIST1H2BK,S100A7,S100A8,S100A9,FCGR1A,HMGB3,GBP5,HLA-DQA2,HLA-DQB1,UBD,ISG15,LY86,HLA-DRA,IFI30,HIST1H2BJ
GO:0038111	interleukin-7-mediated signaling pathway	5	30	1.14	0.0058	9606.ENSP00000333277,9606.ENSP00000352252,9606.ENSP00000358154,9606.ENSP00000366999,9606.ENSP00000385479	HIST2H3D,HIST1H3J,HIST2H3C,HIST1H3D,HIST2H3A
GO:0006325	Chromatin organization	22	713	0.41	0.0069	9606.ENSP00000244573,9606.ENSP00000256442,9606.ENSP00000281453,9606.ENSP00000289316,9606.ENSP00000308750,9606.ENSP00000330074,9606.ENSP00000333277,9606.ENSP00000341094,9606.ENSP00000349430,9606.ENSP00000351589,9606.ENSP00000352119,9606.ENSP00000352252,9606.ENSP00000358154,9606.ENSP00000358155,9606.ENSP00000359393,9606.ENSP00000366618,9606.ENSP00000366999,9606.ENSP00000378699,9606.ENSP00000385479,…	HIST1H1A,CCNB1,CENPU,HIST1H2BD,CBX2,HIST1H1B,HIST2H3D,HIST1H2AD,HIST1H2BK,HIST1H2AI,HIST1H2AG,HIST1H3J,HIST2H3C,HIST2H2AA,HMGB3,HIST1H2BL,HIST1H3D,CDK1,HIST2H3A,HIST1H2BJ,HIST3H2BB,HIST1H2BN
GO:0002478	Antigen processing and presentation of exogenous peptide antigen	10	174	0.68	0.0074	9606.ENSP00000236671,9606.ENSP00000265148,9606.ENSP00000289902,9606.ENSP00000358165,9606.ENSP00000361298,9606.ENSP00000364076,9606.ENSP00000364080,9606.ENSP00000378786,9606.ENSP00000384886,9606.ENSP00000398890	CTSD,CENPE,FCER1G,FCGR1A,KIF2C,HLA-DQA2,HLA-DQB1,HLA-DRA,IFI30,HLA-DMB
GO:0044283	Small molecule biosynthetic process	19	572	0.44	0.0086	9606.ENSP00000264170,9606.ENSP00000264228,9606.ENSP00000267814,9606.ENSP00000278840,9606.ENSP00000296522,9606.ENSP00000301634,9606.ENSP00000301956,9606.ENSP00000347717,9606.ENSP00000354532,9606.ENSP00000355517,9606.ENSP00000360316,9606.ENSP00000361668,9606.ENSP00000369530,9606.ENSP00000370748,9606.ENSP00000377192,9606.ENSP00000379038,9606.ENSP00000383232,9606.ENSP00000384949,9606.ENSP00000418669	KYNU,SRD5A3,SORD,FADS2,HPGD,TK1,ACSM1,DHCR7,PNP,KMO,DHCR24,EDN2,ALOX15B,IDI1,G6PD,TYMP,GGT1,PYCR1,SEPHS2
GO:0006710	Androgen catabolic process	3	5	1.7	0.0091	9606.ENSP00000274192,9606.ENSP00000378517,9606.ENSP00000451406	SRD5A1,SPP1,HSD17B6
GO:0031145	Anaphase-promoting complex-dependent catabolic process	7	83	0.85	0.0099	9606.ENSP00000256442,9606.ENSP00000287598,9606.ENSP00000300093,9606.ENSP00000348838,9606.ENSP00000361540,9606.ENSP00000377536,9606.ENSP00000378699	CCNB1,BUB1B,PLK1,UBE2C,CDC20,PTTG1,CDK1
GO:0006586	Indolalkylamine metabolic process	4	17	1.29	0.01	9606.ENSP00000264170,9606.ENSP00000355517,9606.ENSP00000403644,9606.ENSP00000444788	KYNU,KMO,DDC,TDO2
GO:0050794	Regulation of cellular process	159	10932	0.08	0.0117	9606.ENSP00000188790,9606.ENSP00000199764,9606.ENSP00000215743,9606.ENSP00000216117,9606.ENSP00000217026,9606.ENSP00000217407,9606.ENSP00000222271,9606.ENSP00000225964,9606.ENSP00000226444,9606.ENSP00000231009,9606.ENSP00000233596,9606.ENSP00000236671,9606.ENSP00000242208,9606.ENSP00000244573,9606.ENSP00000247191,9606.ENSP00000250160,9606.ENSP00000250457,9606.ENSP00000256412,9606.ENSP00000256442,…	FAP,CEACAM6,MMP11,HMOX1,MYBL2,LBP,COMP,COL1A1,SULT1E1,GZMK,REEP6,CTSD,INHBA,HIST1H1A,DLGAP5,WISP1,EGLN3,ADAMDEC1,CCNB1,SULF1,LMNB1,NDC80,PKMYT1,TYROBP,PRDX1,CD80,CENPE,TFEC,ANLN,BCL2A1,IGSF6,S100A11,ABCA12,GGCT,THY1,SAMSN1,CXCL13,BUB1B,SLAMF8,FCER1G,HPGD,AQP3,PLK1,TPX2,BIRC5,BUB1,CXCL10,CST1,ALCAM,CXCL8,CXCL11,SDR16C5,RND1,CBX2,MUCL1,CD84,CLSPN,MMP1,TACC3,HIST1H1B,CTHRC1,IDH2,HIST2H3D,CDKN3,HIST1…
GO:0002523	Leukocyte migration involved in inflammatory response	4	18	1.27	0.0118	9606.ENSP00000217407,9606.ENSP00000289707,9606.ENSP00000357722,9606.ENSP00000357727	LBP,SLAMF8,S100A8,S100A9
GO:0006082	Organic acid metabolic process	26	964	0.35	0.012	9606.ENSP00000226444,9606.ENSP00000264170,9606.ENSP00000267814,9606.ENSP00000278840,9606.ENSP00000283871,9606.ENSP00000287275,9606.ENSP00000289004,9606.ENSP00000296522,9606.ENSP00000300079,9606.ENSP00000301956,9606.ENSP00000309270,9606.ENSP00000315013,9606.ENSP00000331897,9606.ENSP00000334276,9606.ENSP00000354532,9606.ENSP00000355517,9606.ENSP00000361668,9606.ENSP00000369530,9606.ENSP00000377492,…	SULT1E1,KYNU,SORD,FADS2,HGD,GLYATL2,HPD,HPGD,GLYATL1,ACSM1,CHST1,CRAT,IDH2,UGT2B28,PNP,KMO,EDN2,ALOX15B,HMMR,GGT1,PYCR1,UGT2B11,DDC,SEPHS2,TDO2,IL4I1
GO:0000226	Microtubule cytoskeleton organization	17	492	0.46	0.0124	9606.ENSP00000217026,9606.ENSP00000256442,9606.ENSP00000261597,9606.ENSP00000265148,9606.ENSP00000271452,9606.ENSP00000300093,9606.ENSP00000300403,9606.ENSP00000301633,9606.ENSP00000326550,9606.ENSP00000356379,9606.ENSP00000361298,9606.ENSP00000361540,9606.ENSP00000369689,9606.ENSP00000378699,9606.ENSP00000393963,9606.ENSP00000451560,9606.ENSP00000453403	MYBL2,CCNB1,NDC80,CENPE,NUF2,PLK1,TPX2,BIRC5,TACC3,ASPM,KIF2C,CDC20,CALML5,CDK1,KIFC1,ENSG00000258947,NUSAP1
GO:0000183	rDNA heterochromatin assembly	5	37	1.05	0.0129	9606.ENSP00000333277,9606.ENSP00000352252,9606.ENSP00000358154,9606.ENSP00000366999,9606.ENSP00000385479	HIST2H3D,HIST1H3J,HIST2H3C,HIST1H3D,HIST2H3A
GO:0033993	Response to lipid	24	858	0.37	0.0129	9606.ENSP00000217407,9606.ENSP00000225964,9606.ENSP00000242208,9606.ENSP00000250092,9606.ENSP00000256442,9606.ENSP00000264246,9606.ENSP00000274192,9606.ENSP00000286758,9606.ENSP00000296522,9606.ENSP00000297991,9606.ENSP00000305651,9606.ENSP00000306512,9606.ENSP00000306884,9606.ENSP00000354901,9606.ENSP00000355517,9606.ENSP00000356432,9606.ENSP00000357712,9606.ENSP00000357722,9606.ENSP00000369071,…	LBP,COL1A1,INHBA,CD68,CCNB1,CD80,SRD5A1,CXCL13,HPGD,AQP3,CXCL10,CXCL8,CXCL11,CXCL9,KMO,BRINP3,S100A7,S100A8,POSTN,SDC1,GJB2,SPP1,GGT1,ACP5
GO:0002429	Immune response-activating cell surface receptor signaling pathway	13	311	0.54	0.0132	9606.ENSP00000284240,9606.ENSP00000289902,9606.ENSP00000311364,9606.ENSP00000341821,9606.ENSP00000356946,9606.ENSP00000358165,9606.ENSP00000364076,9606.ENSP00000364080,9606.ENSP00000378786,9606.ENSP00000381302,9606.ENSP00000427114,9606.ENSP00000433277,9606.ENSP00000484824	THY1,FCER1G,MUCL1,FPR3,FCGR3A,FCGR1A,HLA-DQA2,HLA-DQB1,HLA-DRA,PPAPDC1A,FYB,MS4A1,MUC1
GO:1901605	Alpha-amino acid metabolic process	10	191	0.64	0.014	9606.ENSP00000264170,9606.ENSP00000283871,9606.ENSP00000289004,9606.ENSP00000300079,9606.ENSP00000355517,9606.ENSP00000383232,9606.ENSP00000384949,9606.ENSP00000418669,9606.ENSP00000444788,9606.ENSP00000472474	KYNU,HGD,HPD,GLYATL1,KMO,GGT1,PYCR1,SEPHS2,TDO2,IL4I1
GO:0030334	Regulation of cell migration	24	865	0.37	0.0141	9606.ENSP00000199764,9606.ENSP00000216117,9606.ENSP00000217407,9606.ENSP00000225964,9606.ENSP00000250160,9606.ENSP00000260128,9606.ENSP00000271638,9606.ENSP00000284240,9606.ENSP00000286758,9606.ENSP00000289707,9606.ENSP00000305651,9606.ENSP00000306512,9606.ENSP00000331897,9606.ENSP00000346839,9606.ENSP00000357712,9606.ENSP00000361405,9606.ENSP00000361668,9606.ENSP00000361850,9606.ENSP00000369071,…	CEACAM6,HMOX1,LBP,COL1A1,WISP1,SULF1,S100A11,THY1,CXCL13,SLAMF8,CXCL10,CXCL8,IDH2,FN1,S100A7,MMP9,EDN2,PLAU,POSTN,ALOX15B,CXCR4,TSTA3,LRRC15,ITGAX
GO:0032963	Collagen metabolic process	6	63	0.9	0.0157	9606.ENSP00000215743,9606.ENSP00000225964,9606.ENSP00000236671,9606.ENSP00000260302,9606.ENSP00000322788,9606.ENSP00000361405	MMP11,COL1A1,CTSD,MMP13,MMP1,MMP9
GO:0050778	Positive regulation of immune response	19	607	0.42	0.0163	9606.ENSP00000217407,9606.ENSP00000264246,9606.ENSP00000284240,9606.ENSP00000289902,9606.ENSP00000311364,9606.ENSP00000341821,9606.ENSP00000356946,9606.ENSP00000358165,9606.ENSP00000359393,9606.ENSP00000359488,9606.ENSP00000362116,9606.ENSP00000364076,9606.ENSP00000364080,9606.ENSP00000378786,9606.ENSP00000381302,9606.ENSP00000398890,9606.ENSP00000427114,9606.ENSP00000433277,9606.ENSP00000484824	LBP,CD80,THY1,FCER1G,MUCL1,FPR3,FCGR3A,FCGR1A,HMGB3,GBP5,PGC,HLA-DQA2,HLA-DQB1,HLA-DRA,PPAPDC1A,HLA-DMB,FYB,MS4A1,MUC1
GO:0008152	Metabolic process	127	8298	0.11	0.0175	9606.ENSP00000005286,9606.ENSP00000188790,9606.ENSP00000198801,9606.ENSP00000215743,9606.ENSP00000216117,9606.ENSP00000222271,9606.ENSP00000225964,9606.ENSP00000226444,9606.ENSP00000231009,9606.ENSP00000236671,9606.ENSP00000242208,9606.ENSP00000250457,9606.ENSP00000251864,9606.ENSP00000255084,9606.ENSP00000255695,9606.ENSP00000256412,9606.ENSP00000256442,9606.ENSP00000259938,9606.ENSP00000260128,…	TMEM132A,FAP,MOGAT2,MMP11,HMOX1,COMP,COL1A1,SULT1E1,GZMK,CTSD,INHBA,EGLN3,TDRD1,ALDH3B2,HRASLS2,ADAMDEC1,CCNB1,CLPS,SULF1,MMP13,LYZ,PKMYT1,PRDX1,KYNU,SRD5A3,SORD,SRD5A1,GGCT,FADS2,HGD,THY1,GLYATL2,BUB1B,HPD,HIST1H2BD,FCER1G,CAPN13,HPGD,GLYATL1,PLK1,BIRC5,TK1,ACSM1,BUB1,CXCL8,SDR16C5,CHST1,MUCL1,CD84,CLSPN,CRAT,MMP1,IDH2,HIST2H3D,SULT1C3,UGT2B28,CDKN3,IFI6,DHRS2,FN1,DHCR7,UBE2C,HIST1H2BK,HIST1H3J,…
GO:0034754	Cellular hormone metabolic process	8	125	0.73	0.0175	9606.ENSP00000226444,9606.ENSP00000264228,9606.ENSP00000274192,9606.ENSP00000307607,9606.ENSP00000344674,9606.ENSP00000378517,9606.ENSP00000387683,9606.ENSP00000451406	SULT1E1,SRD5A3,SRD5A1,SDR16C5,DHRS2,SPP1,UGT2B11,HSD17B6
GO:0032103	Positive regulation of response to external stimulus	17	511	0.44	0.0179	9606.ENSP00000217407,9606.ENSP00000250160,9606.ENSP00000286758,9606.ENSP00000289902,9606.ENSP00000305651,9606.ENSP00000306512,9606.ENSP00000311364,9606.ENSP00000357712,9606.ENSP00000357722,9606.ENSP00000357727,9606.ENSP00000359393,9606.ENSP00000359488,9606.ENSP00000361668,9606.ENSP00000362116,9606.ENSP00000369286,9606.ENSP00000386884,9606.ENSP00000484824	LBP,WISP1,CXCL13,FCER1G,CXCL10,CXCL8,MUCL1,S100A7,S100A8,S100A9,HMGB3,GBP5,EDN2,PGC,LY86,CXCR4,MUC1
GO:0065003	Protein-containing complex assembly	31	1293	0.3	0.0193	9606.ENSP00000244573,9606.ENSP00000256442,9606.ENSP00000265148,9606.ENSP00000265748,9606.ENSP00000281453,9606.ENSP00000289316,9606.ENSP00000300403,9606.ENSP00000301634,9606.ENSP00000330074,9606.ENSP00000333277,9606.ENSP00000346839,9606.ENSP00000348838,9606.ENSP00000349430,9606.ENSP00000352252,9606.ENSP00000353770,9606.ENSP00000358154,9606.ENSP00000359488,9606.ENSP00000366618,9606.ENSP00000366999,…	HIST1H1A,CCNB1,CENPE,ANLN,CENPU,HIST1H2BD,TPX2,TK1,HIST1H1B,HIST2H3D,FN1,UBE2C,HIST1H2BK,HIST1H3J,RRM2,HIST2H3C,GBP5,HIST1H2BL,HIST1H3D,CDK1,HLA-DRA,HIST2H3A,HLA-DMB,CDC45,MS4A1,TDO2,APOC1,APOC2,HIST1H2BJ,HIST3H2BB,HIST1H2BN
GO:0043436	Oxoacid metabolic process	25	944	0.35	0.0196	9606.ENSP00000226444,9606.ENSP00000264170,9606.ENSP00000267814,9606.ENSP00000278840,9606.ENSP00000283871,9606.ENSP00000287275,9606.ENSP00000289004,9606.ENSP00000296522,9606.ENSP00000300079,9606.ENSP00000301956,9606.ENSP00000309270,9606.ENSP00000315013,9606.ENSP00000331897,9606.ENSP00000334276,9606.ENSP00000355517,9606.ENSP00000361668,9606.ENSP00000369530,9606.ENSP00000377492,9606.ENSP00000383232,…	SULT1E1,KYNU,SORD,FADS2,HGD,GLYATL2,HPD,HPGD,GLYATL1,ACSM1,CHST1,CRAT,IDH2,UGT2B28,KMO,EDN2,ALOX15B,HMMR,GGT1,PYCR1,UGT2B11,DDC,SEPHS2,TDO2,IL4I1
GO:1901615	Organic hydroxy compound metabolic process	16	467	0.46	0.0196	9606.ENSP00000198801,9606.ENSP00000226444,9606.ENSP00000255084,9606.ENSP00000264228,9606.ENSP00000267814,9606.ENSP00000274192,9606.ENSP00000307607,9606.ENSP00000331897,9606.ENSP00000347717,9606.ENSP00000360316,9606.ENSP00000369530,9606.ENSP00000370748,9606.ENSP00000377192,9606.ENSP00000403644,9606.ENSP00000450980,9606.ENSP00000465356	MOGAT2,SULT1E1,ALDH3B2,SRD5A3,SORD,SRD5A1,SDR16C5,IDH2,DHCR7,DHCR24,ALOX15B,IDI1,G6PD,DDC,DIO2,APOC1
GO:0044282	Small molecule catabolic process	15	424	0.47	0.0219	9606.ENSP00000226444,9606.ENSP00000255084,9606.ENSP00000264170,9606.ENSP00000264228,9606.ENSP00000267814,9606.ENSP00000283871,9606.ENSP00000287275,9606.ENSP00000289004,9606.ENSP00000315013,9606.ENSP00000354532,9606.ENSP00000355517,9606.ENSP00000377492,9606.ENSP00000379038,9606.ENSP00000444788,9606.ENSP00000472474	SULT1E1,ALDH3B2,KYNU,SRD5A3,SORD,HGD,GLYATL2,HPD,CRAT,PNP,KMO,HMMR,TYMP,TDO2,IL4I1
GO:0030574	Collagen catabolic process	5	43	0.99	0.0223	9606.ENSP00000215743,9606.ENSP00000236671,9606.ENSP00000260302,9606.ENSP00000322788,9606.ENSP00000361405	MMP11,CTSD,MMP13,MMP1,MMP9
GO:0090307	Mitotic spindle assembly	5	43	0.99	0.0223	9606.ENSP00000217026,9606.ENSP00000300403,9606.ENSP00000301633,9606.ENSP00000361540,9606.ENSP00000393963	MYBL2,TPX2,BIRC5,CDC20,KIFC1
GO:0019752	Carboxylic acid metabolic process	23	853	0.35	0.0267	9606.ENSP00000264170,9606.ENSP00000267814,9606.ENSP00000278840,9606.ENSP00000283871,9606.ENSP00000287275,9606.ENSP00000289004,9606.ENSP00000296522,9606.ENSP00000300079,9606.ENSP00000301956,9606.ENSP00000315013,9606.ENSP00000331897,9606.ENSP00000334276,9606.ENSP00000355517,9606.ENSP00000361668,9606.ENSP00000369530,9606.ENSP00000377492,9606.ENSP00000383232,9606.ENSP00000384949,9606.ENSP00000387683,…	KYNU,SORD,FADS2,HGD,GLYATL2,HPD,HPGD,GLYATL1,ACSM1,CRAT,IDH2,UGT2B28,KMO,EDN2,ALOX15B,HMMR,GGT1,PYCR1,UGT2B11,DDC,SEPHS2,TDO2,IL4I1
GO:0060968	Regulation of gene silencing	8	137	0.69	0.0295	9606.ENSP00000244573,9606.ENSP00000330074,9606.ENSP00000333277,9606.ENSP00000352252,9606.ENSP00000358154,9606.ENSP00000366999,9606.ENSP00000385479,9606.ENSP00000405726	HIST1H1A,HIST1H1B,HIST2H3D,HIST1H3J,HIST2H3C,HIST1H3D,HIST2H3A,CDC45
GO:0071704	Organic substance metabolic process	119	7755	0.11	0.0312	9606.ENSP00000005286,9606.ENSP00000188790,9606.ENSP00000198801,9606.ENSP00000215743,9606.ENSP00000216117,9606.ENSP00000222271,9606.ENSP00000226444,9606.ENSP00000231009,9606.ENSP00000236671,9606.ENSP00000242208,9606.ENSP00000250457,9606.ENSP00000251864,9606.ENSP00000255084,9606.ENSP00000255695,9606.ENSP00000256412,9606.ENSP00000256442,9606.ENSP00000259938,9606.ENSP00000260128,9606.ENSP00000260302,…	TMEM132A,FAP,MOGAT2,MMP11,HMOX1,COMP,SULT1E1,GZMK,CTSD,INHBA,EGLN3,TDRD1,ALDH3B2,HRASLS2,ADAMDEC1,CCNB1,CLPS,SULF1,MMP13,LYZ,PKMYT1,KYNU,SRD5A3,SORD,SRD5A1,GGCT,FADS2,HGD,THY1,GLYATL2,BUB1B,HPD,HIST1H2BD,FCER1G,CAPN13,HPGD,GLYATL1,PLK1,BIRC5,TK1,ACSM1,BUB1,CXCL8,SDR16C5,CHST1,MUCL1,CLSPN,CRAT,MMP1,IDH2,HIST2H3D,UGT2B28,CDKN3,DHRS2,FN1,DHCR7,UBE2C,HIST1H2BK,HIST1H3J,RRM2,IQGAP3,PNP,KMO,UBE2T,EFNA3…
GO:1901564	Organonitrogen compound metabolic process	87	5244	0.14	0.0314	9606.ENSP00000005286,9606.ENSP00000188790,9606.ENSP00000215743,9606.ENSP00000216117,9606.ENSP00000222271,9606.ENSP00000226444,9606.ENSP00000231009,9606.ENSP00000236671,9606.ENSP00000242208,9606.ENSP00000250457,9606.ENSP00000255084,9606.ENSP00000255695,9606.ENSP00000256412,9606.ENSP00000256442,9606.ENSP00000260128,9606.ENSP00000260302,9606.ENSP00000261267,9606.ENSP00000262300,9606.ENSP00000264170,…	TMEM132A,FAP,MMP11,HMOX1,COMP,SULT1E1,GZMK,CTSD,INHBA,EGLN3,ALDH3B2,HRASLS2,ADAMDEC1,CCNB1,SULF1,MMP13,LYZ,PKMYT1,KYNU,SRD5A3,SRD5A1,GGCT,HGD,THY1,BUB1B,HPD,HIST1H2BD,CAPN13,GLYATL1,PLK1,BIRC5,TK1,ACSM1,BUB1,CHST1,MUCL1,CLSPN,CRAT,MMP1,IDH2,HIST2H3D,CDKN3,FN1,UBE2C,HIST1H2BK,HIST1H3J,IQGAP3,PNP,KMO,UBE2T,EFNA3,S100A8,S100A9,HIST2H3C,COL11A1,CLCA2,DHCR24,MMP9,CDC20,PLAU,PGC,UBD,HIST1H2BL,HIST1H3D,…
GO:0032940	Secretion by cell	25	979	0.33	0.0316	9606.ENSP00000199764,9606.ENSP00000222271,9606.ENSP00000225777,9606.ENSP00000236147,9606.ENSP00000236671,9606.ENSP00000242208,9606.ENSP00000250092,9606.ENSP00000259396,9606.ENSP00000261267,9606.ENSP00000262629,9606.ENSP00000271638,9606.ENSP00000272895,9606.ENSP00000289902,9606.ENSP00000296370,9606.ENSP00000346839,9606.ENSP00000354532,9606.ENSP00000357712,9606.ENSP00000357722,9606.ENSP00000357727,…	CEACAM6,COMP,SYNGR2,SELL,CTSD,INHBA,CD68,ORM1,LYZ,TYROBP,S100A11,ABCA12,FCER1G,S100P,FN1,PNP,S100A7,S100A8,S100A9,MMP9,PLAU,CALML5,ORM2,ITGAX,TMC6
GO:0042537	Benzene-containing compound metabolic process	4	26	1.11	0.0348	9606.ENSP00000264170,9606.ENSP00000301956,9606.ENSP00000355517,9606.ENSP00000444788	KYNU,ACSM1,KMO,TDO2
GO:0006569	Tryptophan catabolic process	3	10	1.4	0.0359	9606.ENSP00000264170,9606.ENSP00000355517,9606.ENSP00000444788	KYNU,KMO,TDO2
GO:0006702	Androgen biosynthetic process	3	10	1.4	0.0359	9606.ENSP00000264228,9606.ENSP00000274192,9606.ENSP00000451406	SRD5A3,SRD5A1,HSD17B6
GO:0008209	Androgen metabolic process	4	27	1.09	0.0384	9606.ENSP00000264228,9606.ENSP00000274192,9606.ENSP00000378517,9606.ENSP00000451406	SRD5A3,SRD5A1,SPP1,HSD17B6
GO:0051239	Regulation of multicellular organismal process	59	3227	0.18	0.0392	9606.ENSP00000188790,9606.ENSP00000216117,9606.ENSP00000217407,9606.ENSP00000222271,9606.ENSP00000225964,9606.ENSP00000242208,9606.ENSP00000250160,9606.ENSP00000256442,9606.ENSP00000259396,9606.ENSP00000260128,9606.ENSP00000262629,9606.ENSP00000264246,9606.ENSP00000284240,9606.ENSP00000286758,9606.ENSP00000289707,9606.ENSP00000289902,9606.ENSP00000297991,9606.ENSP00000305651,9606.ENSP00000306512,…	FAP,HMOX1,LBP,COMP,COL1A1,INHBA,WISP1,CCNB1,ORM1,SULF1,TYROBP,CD80,THY1,CXCL13,SLAMF8,FCER1G,AQP3,CXCL10,CXCL8,CD84,CTHRC1,IDH2,HIST2H3D,FN1,HIST1H3J,IQGAP3,PNP,ASPM,BRINP3,EFNA3,S100A9,HIST2H3C,EPS8L3,HMGB3,GBP5,MMP9,CDC20,EDN2,PLAU,HIST1H3D,ISG15,POSTN,ALOX15B,G6PD,SPP1,CDK1,TYMP,HIST2H3A,CXCR4,ACE2,ORM2,TSTA3,LTB,FBN2,DIO2,ITGAX,APOC1,APOC2,ACP5
GO:0051128	Regulation of cellular component organization	47	2402	0.21	0.0412	9606.ENSP00000188790,9606.ENSP00000242208,9606.ENSP00000244573,9606.ENSP00000247191,9606.ENSP00000256442,9606.ENSP00000261597,9606.ENSP00000262300,9606.ENSP00000262629,9606.ENSP00000265148,9606.ENSP00000265748,9606.ENSP00000284240,9606.ENSP00000286758,9606.ENSP00000287598,9606.ENSP00000300093,9606.ENSP00000300403,9606.ENSP00000301633,9606.ENSP00000302530,9606.ENSP00000305651,9606.ENSP00000307607,…	FAP,INHBA,HIST1H1A,DLGAP5,CCNB1,NDC80,PKMYT1,TYROBP,CENPE,ANLN,THY1,CXCL13,BUB1B,PLK1,TPX2,BIRC5,BUB1,CXCL10,SDR16C5,MMP1,TACC3,HIST1H1B,FN1,UBE2C,IQGAP3,CXCL9,MKI67,S100A8,S100A9,EPS8L3,GBP5,MMP9,CDC20,SDC1,G6PD,PTTG1,SPP1,MPV17L,LCP1,CXCR4,ACE2,CDC45,TOP2A,NUSAP1,APOC1,APOC2,MUC1
GO:0042446	Hormone biosynthetic process	5	51	0.91	0.0421	9606.ENSP00000264228,9606.ENSP00000274192,9606.ENSP00000347717,9606.ENSP00000450980,9606.ENSP00000451406	SRD5A3,SRD5A1,DHCR7,DIO2,HSD17B6
GO:0071222	Cellular response to lipopolysaccharide	9	185	0.61	0.0421	9606.ENSP00000217407,9606.ENSP00000250092,9606.ENSP00000264246,9606.ENSP00000286758,9606.ENSP00000305651,9606.ENSP00000306512,9606.ENSP00000306884,9606.ENSP00000354901,9606.ENSP00000355517	LBP,CD68,CD80,CXCL13,CXCL10,CXCL8,CXCL11,CXCL9,KMO
GO:0006706	Steroid catabolic process	4	28	1.08	0.0425	9606.ENSP00000226444,9606.ENSP00000274192,9606.ENSP00000378517,9606.ENSP00000451406	SULT1E1,SRD5A1,SPP1,HSD17B6
GO:0033043	Regulation of organelle organization	30	1306	0.28	0.043	9606.ENSP00000244573,9606.ENSP00000247191,9606.ENSP00000256442,9606.ENSP00000261597,9606.ENSP00000262300,9606.ENSP00000265148,9606.ENSP00000265748,9606.ENSP00000287598,9606.ENSP00000300093,9606.ENSP00000300403,9606.ENSP00000301633,9606.ENSP00000302530,9606.ENSP00000307607,9606.ENSP00000326550,9606.ENSP00000330074,9606.ENSP00000348838,9606.ENSP00000354451,9606.ENSP00000357643,9606.ENSP00000357722,…	HIST1H1A,DLGAP5,CCNB1,NDC80,PKMYT1,CENPE,ANLN,BUB1B,PLK1,TPX2,BIRC5,BUB1,SDR16C5,TACC3,HIST1H1B,UBE2C,IQGAP3,MKI67,S100A8,S100A9,MMP9,CDC20,SDC1,PTTG1,MPV17L,LCP1,CDC45,TOP2A,NUSAP1,MUC1
GO:0006559	L-phenylalanine catabolic process	3	11	1.36	0.0431	9606.ENSP00000283871,9606.ENSP00000289004,9606.ENSP00000472474	HGD,HPD,IL4I1
GO:0051238	Sequestering of metal ion	3	11	1.36	0.0431	9606.ENSP00000357712,9606.ENSP00000357722,9606.ENSP00000357727	S100A7,S100A8,S100A9
GO:0070098	Chemokine-mediated signaling pathway	6	80	0.8	0.0431	9606.ENSP00000286758,9606.ENSP00000305651,9606.ENSP00000306512,9606.ENSP00000306884,9606.ENSP00000354901,9606.ENSP00000386884	CXCL13,CXCL10,CXCL8,CXCL11,CXCL9,CXCR4
GO:0070189	Kynurenine metabolic process	3	11	1.36	0.0431	9606.ENSP00000264170,9606.ENSP00000355517,9606.ENSP00000444788	KYNU,KMO,TDO2
GO:0007017	Microtubule-based process	20	727	0.36	0.0457	9606.ENSP00000217026,9606.ENSP00000247191,9606.ENSP00000256442,9606.ENSP00000261597,9606.ENSP00000265148,9606.ENSP00000267814,9606.ENSP00000271452,9606.ENSP00000300093,9606.ENSP00000300403,9606.ENSP00000301633,9606.ENSP00000326550,9606.ENSP00000356379,9606.ENSP00000361298,9606.ENSP00000361540,9606.ENSP00000369689,9606.ENSP00000378699,9606.ENSP00000380690,9606.ENSP00000393963,9606.ENSP00000451560,…	MYBL2,DLGAP5,CCNB1,NDC80,CENPE,SORD,NUF2,PLK1,TPX2,BIRC5,TACC3,ASPM,KIF2C,CDC20,CALML5,CDK1,CCDC64,KIFC1,ENSG00000258947,NUSAP1
GO:0032101	Regulation of response to external stimulus	25	1013	0.31	0.0457	9606.ENSP00000188790,9606.ENSP00000217407,9606.ENSP00000250160,9606.ENSP00000286758,9606.ENSP00000289707,9606.ENSP00000289902,9606.ENSP00000305651,9606.ENSP00000306512,9606.ENSP00000311364,9606.ENSP00000357429,9606.ENSP00000357712,9606.ENSP00000357722,9606.ENSP00000357727,9606.ENSP00000359393,9606.ENSP00000359488,9606.ENSP00000361668,9606.ENSP00000361850,9606.ENSP00000362116,9606.ENSP00000369286,…	FAP,LBP,WISP1,CXCL13,SLAMF8,FCER1G,CXCL10,CXCL8,MUCL1,FABP7,S100A7,S100A8,S100A9,HMGB3,GBP5,EDN2,PLAU,PGC,LY86,SPP1,GGT1,CXCR4,ACE2,ACP5,MUC1
GO:0010941	Regulation of cell death	36	1696	0.25	0.0474	9606.ENSP00000188790,9606.ENSP00000199764,9606.ENSP00000216117,9606.ENSP00000217026,9606.ENSP00000222271,9606.ENSP00000231009,9606.ENSP00000236671,9606.ENSP00000242208,9606.ENSP00000250160,9606.ENSP00000250457,9606.ENSP00000262629,9606.ENSP00000267953,9606.ENSP00000289902,9606.ENSP00000296522,9606.ENSP00000300093,9606.ENSP00000301633,9606.ENSP00000305651,9606.ENSP00000342513,9606.ENSP00000344674,…	FAP,CEACAM6,HMOX1,MYBL2,COMP,GZMK,CTSD,INHBA,WISP1,EGLN3,TYROBP,BCL2A1,FCER1G,HPGD,PLK1,BIRC5,CXCL10,IFI6,DHRS2,FN1,KMO,S100A8,S100A9,DHCR24,MMP9,VSTM2L,UBD,G6PD,CDK1,MPV17L,PYCR1,CXCR4,TOP2A,MTRNR2L1,MTRNR2L8,MUC1
GO:1901992	Positive regulation of mitotic cell cycle phase transition	6	82	0.79	0.0474	9606.ENSP00000247191,9606.ENSP00000256442,9606.ENSP00000301633,9606.ENSP00000348838,9606.ENSP00000378699,9606.ENSP00000405726	DLGAP5,CCNB1,BIRC5,UBE2C,CDK1,CDC45
GO:0140013	Meiotic nuclear division	8	152	0.64	0.0492	9606.ENSP00000271452,9606.ENSP00000287598,9606.ENSP00000300093,9606.ENSP00000302530,9606.ENSP00000356379,9606.ENSP00000364976,9606.ENSP00000377536,9606.ENSP00000411532	NUF2,BUB1B,PLK1,BUB1,ASPM,CKS2,PTTG1,TOP2A
